# Supplementary material for: Pan-mammalian analysis of molecular constraints underlying extended lifespan
Source: eLife. 2020 Feb 11;9:e51089. doi: 10.7554/eLife.51089 (PMC7012612; doi:10.7554/eLife.51089)
Supplement: Supplementary file 1. — Includes longevity, body size, 3L, and ELL values for the 61 mammal species used for analyses. [file elife-51089-supp1.xlsx]

## Sheet: Phenotype Values
Code	Name	Adult weight (g)	Maximum longevity (yrs)	3L phenotype (PC1)	ELL phenotype (PC2)	Comments
vicPac2	Alpaca	62000	25.8	0.804892	-0.309095	captivity
turTru2	Dolphin	200000	51.6	1.59797	0.028521	captivity
tupChi1	Chinese_tree_shrew	200	11.1	-0.998477	0.118434	captivity
triMan1	Manatee	322000	65	1.87887	0.124219	captivity
susScr3	Pig	130000	27	0.985939	-0.415982	captivity
speTri2	Squirrel	136	7.1	-1.43793	-0.171037	captivity
sorAra2	Shrew	9	3.2	-2.61594	-0.29304	captivity
sarHar1	Tasmanian_devil	6500	13	-0.192695	-0.429604	captivity
saiBol1	Squirrel_monkey	615	30.3	0.0389944	0.719063	captivity
rn5	Rat	300	3.8	-1.79394	-0.834708	captivity
rheMac3	Rhesus	8235	40	0.770012	0.441095	captivity
pteVam1	Megabat	872	20.9	-0.196033	0.348248	captivity
pteAle1	Black_flying-fox	672.1	19.7	-0.294891	0.35065	captivity
ponAbe2	Orangutan	64475	59	1.48716	0.357947	captivity
papHam1	Baboon	18000	37.5	0.869425	0.236403	captivity
panTro4	Chimp	44983.5	59.4	1.42267	0.433455	captivity
panHod1	Tibetan_antelope	32000	10	-0.0967524	-0.953527	wild; no specimens maintained long enough in captivity. Likely 10+ years
oviAri3	Sheep	160000	16.8	0.639335	-0.843335	captivity
otoGar3	Bushbaby	1300	18.3	-0.226739	0.162247	captivity
oryCun2	Rabbit	1800	9	-0.74229	-0.479858	unknown
oryAfe1	Aardvark	60000	29.8	0.916075	-0.18516	captivity
ornAna1	Platypus	1250	22.6	-0.0622289	0.342009	captivity
orcOrc1	Killer_whale	3990000	90	2.63371	-0.0997769	wild
odoRosDi	Pacific_walrus	1010000	40	1.70516	-0.494053	wild; little data for captivity. Likely 40+ years
octDeg1	Brush-tailed_rat	235	14	-0.777803	0.276392	captivity
ochPri3	Pika	100	7	-1.50929	-0.122817	captivity
nomLeu3	Gibbon	6000	44.1	0.788033	0.582251	captivity
myoLuc2	Microbat	10	34	-0.667962	1.61396	wild
myoDav1	Davids_Myotis_bat	5.3	24	-1.0755	1.45332	wild
musFur1	Ferret	809	11.1	-0.726744	-0.153299	captivity
monDom5	Opossum	105	5.1	-1.75808	-0.390587	captivity
mm10	Mouse	20.5	4	-2.27387	-0.271106	captivity
micOch1	Prairie_vole	40	5.3	-1.91436	-0.171558	captivity
mesAur1	Golden_hamster	105	3.9	-1.97688	-0.609389	captivity
macFas5	Crab-eating_macaque	6362.5	39	0.699201	0.470606	captivity
macEug2	Wallaby	6500	15.1	-0.0705592	-0.307469	captivity
loxAfr3	Elephant	4800000	65	2.40423	-0.401137	captivity
lepWed1	Weddell_seal	425000	30	1.3022	-0.560378	unknown; average longevity
jacJac1	Lesser_Egyptian_jerboa	55	7.3	-1.59131	0.0276564	captivity
hg19	Human	62035	95	1.86817	0.753962	captivity; longest-lived person was over 122 years old, but since the sample size for humans is so large relative to other species, maximum longevity of between 90 and 100 years is more accurate for comparative purposes
hetGla2	Naked_mole-rat	35	31	-0.49971	1.29503	captivity
gorGor3	Gorilla	139842	60.1	1.65277	0.222467	captivity
felCat5	Cat	5500	19	0.0843425	-0.0876011	captivity
eriEur2	Hedgehog	750	11.7	-0.698531	-0.0956373	captivity
equCab2	Horse	300000	57	1.75799	0.0308589	captivity
eptFus1	Big_brown_bat	23	19	-0.980636	0.977377	wild
eleEdw1	Cape_elephant_shrew	50	8.75	-1.46207	0.193963	captivity
echTel2	Tenrec	180	19	-0.580572	0.577313	captivity
dasNov3	Armadillo	5500	22.3	0.214963	0.043019	captivity
criGri1	Chinese_hamster	37	5.3	-1.92952	-0.156398	captivity
conCri1	Star-nosed_mole	55.3	2.5	-2.46426	-0.847409	captivity
chlSab1	Green_monkey	5150	13	-0.237963	-0.384336	captivity
chiLan1	Chinchilla	642.5	17.2	-0.414336	0.248721	captivity
cerSim1	White_rhinoceros	2180000	45	1.95083	-0.547588	captivity
cavPor3	Guinea_pig	728	12	-0.68367	-0.0691985	captivity
capHir1	Domestic_goat	61000	20.8	0.626027	-0.481635	captivity
canFam3	Dog	26625	20.6	0.456947	-0.328316	captivity
camFer1	Bactrian_camel	475000	35.4	1.45883	-0.447008	captivity
calJac3	Marmoset	255.2	22.8	-0.363987	0.65814	captivity
bosTau7	Cow	750000	20	1.08194	-1.00153	captivity
ailMel1	Panda	117500	36.8	1.21885	-0.143758	captivity
