# Supplementary material for: Pan-mammalian analysis of molecular constraints underlying extended lifespan
Source: eLife. 2020 Feb 11;9:e51089. doi: 10.7554/eLife.51089 (PMC7012612; doi:10.7554/eLife.51089)
Supplement: Supplementary file 2. — Pathway enrichment results for both the 3L and ELL phenotypes using MSigDB canonical pathway annotations. [file elife-51089-supp2.xlsx]

## Sheet: 3L (PC1) Negative Correlations
	stat	pval	simpermPval	p.adj	# of genes	top ten genes and rank	qval
KEGG_CYTOKINE_CYTOKINE_RECEPTOR_INTERACTION	-0.181328	7.97161e-23	0.001	3.3959e-20	253	XCR1:44, CCL22:48, AMHR2:85, IL18:130, TNFSF15:161, TNFSF14:180, TNFRSF11A:184, TNFRSF9:200, IL21:218, XCL1:304	0.0374511
NABA_SECRETED_FACTORS	-0.0897761	2.85618e-08	0.001	2.80784e-06	332	CCL22:48, NRG4:49, IL18:130, ANGPT2:154, TNFSF15:161, TNFSF14:180, WNT8A:236, XCL1:304, TNFSF8:323, XCL2:325	0.0374511
REACTOME_RIG_I_MDA5_MEDIATED_INDUCTION_OF_IFN_ALPHA_BETA_PATHWAYS	-0.194543	6.25581e-08	0.001	5.32995e-06	65	CASP10:123, IKBKG:160, IRF1:179, S100B:369, NLRC5:545, RELA:803, IFNA1:875, TRAF2:896, RIPK1:941, IFIH1:969	0.0374511
REACTOME_CHEMOKINE_RECEPTORS_BIND_CHEMOKINES	-0.212821	6.69081e-08	0.001	5.34428e-06	54	XCR1:44, CCL22:48, CCRL1:183, XCL1:304, XCL2:325, CXCL10:617, CCR4:1063, CCL2:1226, CXCL11:1305, CXCL9:1334	0.0374511
KEGG_RIG_I_LIKE_RECEPTOR_SIGNALING_PATHWAY	-0.169287	8.67546e-07	0.001	5.27964e-05	71	CASP10:123, IKBKG:160, CXCL10:617, IFNE:674, RELA:803, IFNA1:875, TRAF2:896, RIPK1:941, IFIH1:969, TRAF6:1024	0.0374511
REACTOME_EXTRINSIC_PATHWAY_FOR_APOPTOSIS	-0.36976	3.94329e-06	0.001	0.000193828	13	CASP10:123, TNFSF10:423, FASLG:557, TNFRSF10B:695, TRAF2:896, RIPK1:941, CASP8:1146, CFLAR:1412, TRADD:2422, TNF:3304	0.0374511
BIOCARTA_DEATH_PATHWAY	-0.234519	4.511e-06	0.001	0.00021352	32	CASP10:123, TNFSF10:423, TNFRSF25:567, TNFRSF10B:695, RELA:803, TRAF2:896, RIPK1:941, CASP8:1146, CFLAR:1412, NFKBIA:1497	0.0374511
BIOCARTA_ATRBRCA_PATHWAY	-0.284617	6.41969e-06	0.001	0.000282909	21	FANCD2:446, NBN:549, RAD9A:725, ATR:947, FANCC:1568, FANCG:1985, RAD1:2452, BRCA2:2576, CHEK1:2785, TP53:3130	0.0374511
PID_ATR_PATHWAY	-0.203243	1.49289e-05	0.001	0.000578156	38	CEP164:26, RPA1:379, FANCD2:446, NBN:549, RAD9A:725, RFC5:940, ATR:947, TOPBP1:1762, RPA2:1856, CDC25C:2283	0.0374511
BIOCARTA_HIVNEF_PATHWAY	-0.157843	4.55257e-05	0.001	0.00141907	56	FASLG:557, RELA:803, TRAF2:896, RIPK1:941, CASP8:1146, CFLAR:1412, NFKBIA:1497, DAXX:1521, CASP7:1615, BIRC2:1941	0.0374511
PID_BCR_5PATHWAY	-0.138496	0.000116996	0.001	0.00282114	65	IKBKG:160, VAV2:222, RELA:803, NFATC1:911, BCL2A1:965, PPP3CC:1012, TRAF6:1024, SHC1:1107, CD72:1148, ELK1:1165	0.0374511
REACTOME_MITOTIC_G2_G2_M_PHASES	-0.123417	0.000228454	0.001	0.00512218	75	CEP164:26, SDCCAG8:92, CDC25B:250, OFD1:267, XPO1:403, E2F3:419, PAFAH1B1:451, CDK5RAP2:684, FGFR1OP:737, TUBB4B:1203	0.0374511
PID_IL27_PATHWAY	-0.194501	0.000603796	0.001	0.0110236	26	IL18:130, EBI3:431, STAT2:452, IL12B:1150, IL27:1224, IL6ST:2151, TYK2:2617, IL12A:2863, TNF:3304, IFNG:4722	0.0374511
PID_EPO_PATHWAY	-0.172347	0.000620415	0.001	0.0111675	33	PTPN11:39, SH2B3:175, VAV2:222, GAB1:646, RAPGEF1:848, SHC1:1107, TRPC6:1315, SOS1:1341, BTK:3281, EPO:3495	0.0374511
PID_IGF1_PATHWAY	-0.177622	0.000941606	0.001	0.0152889	29	PTPN11:39, IGF1R:94, PRKCZ:246, IGF1:1014, SHC1:1107, CRK:1250, SOS1:1341, PTK2:2115, IRS1:2430, RAF1:2773	0.0374511
BIOCARTA_SODD_PATHWAY	-0.279459	0.00221884	0.001	0.0260154	10	TRAF2:896, RIPK1:941, CASP8:1146, TRADD:2422, TNF:3304, TNFRSF1B:4895, FADD:5774, BIRC3:6125, TNFRSF1A:6943, BAG4:14607	0.0374511
REACTOME_INNATE_IMMUNE_SYSTEM	-0.115644	5.23434e-10	0.002	1.11491e-07	248	MEF2A:69, CASP10:123, IKBKG:160, IRF1:179, TLR10:223, DEFB105A:238, S100B:369, NLRC5:545, RPS6KA5:559, C5:594	0.0499348
PID_HIV_NEF_PATHWAY	-0.193562	7.55457e-05	0.002	0.00202029	35	FASLG:557, RELA:803, TRAF2:896, RIPK1:941, CASP8:1146, CFLAR:1412, NFKBIA:1497, DAXX:1521, CASP7:1615, TRADD:2422	0.0499348
KEGG_SMALL_CELL_LUNG_CANCER	-0.124576	8.33515e-05	0.002	0.00217394	84	IKBKG:160, CDK4:198, COL4A6:343, FN1:392, E2F3:419, AKT3:541, PIAS3:616, E2F2:721, RELA:803, TRAF2:896	0.0499348
BIOCARTA_TALL1_PATHWAY	-0.282259	0.000257046	0.002	0.00566387	14	RELA:803, TRAF2:896, TRAF6:1024, TRAF5:1759, TNFSF13B:2310, CHUK:4461, TNFRSF13C:5037, TNFRSF17:5046, TRAF3:5068, MAPK14:6244	0.0499348
BIOCARTA_CYTOKINE_PATHWAY	-0.224845	0.000364549	0.002	0.00751441	21	IL18:130, IFNA1:875, IL15:990, IL12B:1150, IL1A:2013, LTA:2139, IL9:2749, IL12A:2863, IL5:3174, TNF:3304	0.0499348
PID_IL4_2PATHWAY	-0.115068	0.0016247	0.002	0.0209734	63	OPRM1:344, STAT6:592, IL13RA2:807, SHC1:1107, DOK2:1463, IRF4:2009, LTA:2139, ETS1:2317, IRS1:2430, CD40LG:3155	0.0499348
BIOCARTA_TNFR2_PATHWAY	-0.20888	0.00216709	0.002	0.025836	18	IKBKG:160, RELA:803, TRAF2:896, RIPK1:941, NFKBIA:1497, IKBKAP:1726, LTA:2139, MAP3K1:2324, CHUK:4461, TNFRSF1B:4895	0.0499348
BIOCARTA_STRESS_PATHWAY	-0.167393	0.00379503	0.002	0.0364665	25	IKBKG:160, RELA:803, TRAF2:896, RIPK1:941, NFKBIA:1497, LTA:2139, MAP3K1:2324, TRADD:2422, CRADD:2708, TNF:3304	0.0499348
KEGG_CHEMOKINE_SIGNALING_PATHWAY	-0.0979604	7.54824e-06	0.003	0.000321555	178	XCR1:44, CCL22:48, IKBKG:160, ADCY7:169, VAV2:222, PRKCZ:246, XCL1:304, TIAM2:312, XCL2:325, STAT2:452	0.0691404
ST_TUMOR_NECROSIS_FACTOR_PATHWAY	-0.159264	0.00302118	0.003	0.0327209	29	IKBKG:160, TRAF2:896, RIPK1:941, CASP8:1146, CFLAR:1412, NFKBIA:1497, BIRC2:1941, TRADD:2422, NFKBIB:2882, TNF:3304	0.0691404
BIOCARTA_NKT_PATHWAY	-0.217897	4.96308e-05	0.004	0.0015102	29	CD28:342, IL18R1:635, CCR4:1063, IL12B:1150, CXCR3:1517, CCR7:2650, IL12A:2863, CCL4:3019, CD40LG:3155, IL5:3174	0.0798956
REACTOME_CYTOKINE_SIGNALING_IN_IMMUNE_SYSTEM	-0.0716151	9.08421e-05	0.004	0.00232192	257	NUP214:90, IL18:130, IKBKG:160, IRF1:179, ADAR:302, EIF4E2:404, GHR:436, STAT2:452, KPNA1:507, IL5RA:591	0.0798956
REACTOME_NUCLEAR_SIGNALING_BY_ERBB4	-0.160325	0.000884975	0.004	0.0148816	36	NRG4:49, YAP1:270, S100B:369, GHR:436, WWOX:643, GH1:1436, PRL:2468, GH2:2599, CSH1:2977, BTC:3525	0.0798956
BIOCARTA_CD40_PATHWAY	-0.217491	0.00355576	0.004	0.0352269	15	IKBKG:160, RELA:803, TRAF6:1024, NFKBIA:1497, IKBKAP:1726, CD40:2024, MAP3K1:2324, CD40LG:3155, CHUK:4461, TRAF3:5068	0.0798956
REACTOME_IMMUNE_SYSTEM	-0.0599931	1.20362e-08	0.005	1.53823e-06	838	ASB6:25, MEF2A:69, NUP214:90, CASP10:123, ASB9:126, IL18:130, UBA5:132, IKBKG:160, IRF1:179, TLR10:223	0.0832246
REACTOME_CDC6_ASSOCIATION_WITH_THE_ORC_ORIGIN_COMPLEX	-0.344927	7.49493e-05	0.005	0.00202029	11	ORC2:387, E2F3:419, E2F2:721, ORC3:974, ORC6:2164, ORC1:2726, CDC6:3930, ORC5:4762, MCM8:5075, E2F1:6377	0.0832246
BIOCARTA_NFKB_PATHWAY	-0.212295	0.000428737	0.005	0.00869724	23	IKBKG:160, RELA:803, RIPK1:941, TRAF6:1024, IRAK1:1183, NFKBIA:1497, IL1A:2013, MAP3K1:2324, TRADD:2422, TLR4:3084	0.0832246
BIOCARTA_TOLL_PATHWAY	-0.155865	0.00105048	0.005	0.0161172	37	IKBKG:160, TLR10:223, RELA:803, TRAF6:1024, ELK1:1165, IRAK1:1183, TLR9:1289, NFKBIA:1497, ECSIT:1523, MAP3K1:2324	0.0832246
BIOCARTA_RB_PATHWAY	-0.254865	0.00147	0.005	0.0195266	13	CDK4:198, CDC25B:250, CDC25C:2283, CHEK1:2785, TP53:3130, RB1:3246, WEE1:4805, ATM:5960, MAPK14:6244, CDK1:7046	0.0832246
REACTOME_TRAF6_MEDIATED_NFKB_ACTIVATION	-0.194772	0.00201676	0.005	0.0247828	21	IKBKG:160, S100B:369, RELA:803, TRAF2:896, IFIH1:969, TRAF6:1024, NFKBIA:1497, MAP3K1:2324, NFKBIB:2882, NFKB2:3333	0.0832246
KEGG_JAK_STAT_SIGNALING_PATHWAY	-0.121982	3.51338e-07	0.006	2.4945e-05	148	PTPN11:39, IL21:218, GHR:436, STAT2:452, AKT3:541, IL5RA:591, STAT6:592, PIAS3:616, IFNE:674, IL13RA2:807	0.0898826
REACTOME_ASSOCIATION_OF_LICENSING_FACTORS_WITH_THE_PRE_REPLICATIVE_COMPLEX	-0.322522	0.000213248	0.006	0.00486662	11	ORC2:387, E2F3:419, E2F2:721, GMNN:904, ORC3:974, ORC1:2726, CDC6:3930, ORC5:4762, E2F1:6377, ORC4:9755	0.0898826
BIOCARTA_IL22BP_PATHWAY	-0.200003	0.00563249	0.006	0.0479708	16	STAT2:452, STAT6:592, IL10RA:1348, TYK2:2617, IL22RA1:2862, IL22:3491, JAK3:5473, IL22RA2:6065, JAK2:7161, STAT3:7733	0.0898826
PID_CASPASE_PATHWAY	-0.108996	0.00665011	0.006	0.0544797	52	CASP10:123, TRAF2:896, RIPK1:941, CASP8:1146, CASP7:1615, TFAP2A:1628, BIRC2:1941, PTK2:2115, SPTAN1:2174, MAP3K1:2324	0.0898826
REACTOME_CELL_CYCLE	-0.126266	3.44169e-16	0.007	1.09962e-13	364	KNTC1:1, CEP164:26, MYBL2:66, CENPN:87, SDCCAG8:92, ACD:142, RPA4:193, CASC5:196, CDK4:198, CDC25B:250	0.097547
REACTOME_CELL_CYCLE_MITOTIC	-0.131694	2.35903e-14	0.007	6.02967e-12	290	KNTC1:1, CEP164:26, MYBL2:66, CENPN:87, SDCCAG8:92, RPA4:193, CASC5:196, CDK4:198, CDC25B:250, OFD1:267	0.097547
KEGG_TOLL_LIKE_RECEPTOR_SIGNALING_PATHWAY	-0.117976	4.47454e-05	0.007	0.00141907	101	IKBKG:160, AKT3:541, CXCL10:617, RELA:803, CTSK:841, IFNA1:875, RIPK1:941, TRAF6:1024, CASP8:1146, IL12B:1150	0.097547
PID_FANCONI_PATHWAY	-0.211818	6.96693e-07	0.008	4.45187e-05	46	FANCI:134, RPA1:379, FANCD2:446, NBN:549, FANCB:597, RAD9A:725, RFC5:940, ATR:947, BLM:957, FANCC:1568	0.0998695
REACTOME_PEPTIDE_LIGAND_BINDING_RECEPTORS	-0.101174	3.53196e-06	0.008	0.000180554	179	C3AR1:8, XCR1:44, CCL22:48, EDN1:170, CCRL1:183, XCL1:304, GRPR:316, XCL2:325, OPRM1:344, MC3R:586	0.0998695
PID_IL23_PATHWAY	-0.177684	0.000187472	0.008	0.00435616	37	IL18:130, IL18R1:635, RELA:803, IL12B:1150, CCL2:1226, CXCL9:1334, NFKBIA:1497, TYK2:2617, TNF:3304, CD4:3879	0.0998695
ST_GAQ_PATHWAY	-0.132083	0.0156566	0.008	0.0939398	28	IKBKG:160, ITPR1:306, AKT3:541, NFKBIA:1497, PITX2:2096, NFKBIB:2882, ITPKB:2931, PHKA2:3023, NFKB2:3333, AKT1:3757	0.0998695
PID_PTP1B_PATHWAY	-0.0901046	0.0277919	0.008	0.141578	50	INSR:413, FER:671, EGF:919, SHC1:1107, CRK:1250, YBX1:1713, IRS1:2430, PRL:2468, TYK2:2617, LEPR:2723	0.0998695
PID_CD40_PATHWAY	-0.133059	0.0104276	0.009	0.070739	31	RELA:803, TRAF2:896, TRAF6:1024, NFKBIA:1497, BIRC2:1941, CD40:2024, MAP3K1:2324, CD40LG:3155, FCAMR:3515, AKT1:3757	0.11006
REACTOME_FANCONI_ANEMIA_PATHWAY	-0.293686	9.46143e-06	0.01	0.000390055	19	FANCD2:446, FANCB:597, ZBTB32:910, ATR:947, FANCC:1568, FANCL:1776, FANCG:1985, PALB2:2288, BRCA2:2576, FANCF:3455	0.117494
PID_FCER1_PATHWAY	-0.109669	0.00311768	0.01	0.0334526	61	NFATC2:38, PTPN11:39, PPAP2A:143, IKBKG:160, FER:671, RELA:803, SHC1:1107, SOS1:1341, KLRG1:1572, PLA2G4A:1739	0.117494
ST_FAS_SIGNALING_PATHWAY	-0.1026	0.00495468	0.011	0.0445922	63	CASP10:123, CASP8AP2:550, TRAF2:896, RIPK1:941, CASP8:1146, NFKBIA:1497, DAXX:1521, IL1A:2013, TNFRSF6B:2044, CDK2AP1:2235	0.124366
BIOCARTA_HSP27_PATHWAY	-0.186053	0.0126414	0.011	0.079374	15	FASLG:557, MAPKAPK2:799, DAXX:1521, IL1A:2013, MAPKAPK3:2914, TNF:3304, HSPB1:5645, BCL2:5991, CASP9:7210, ACTA1:8492	0.124366
KEGG_CYTOSOLIC_DNA_SENSING_PATHWAY	-0.167047	1.89596e-05	0.012	0.000692296	55	IL18:130, IKBKG:160, ADAR:302, CXCL10:617, RELA:803, IFNA1:875, RIPK1:941, IFNA21:1232, IFNA8:1246, IKBKE:1327	0.128404
REACTOME_GLUCAGON_TYPE_LIGAND_RECEPTORS	-0.161418	0.00314108	0.012	0.0334526	28	GCG:860, GNG7:869, GCGR:903, GNG13:1103, VIPR2:1666, GNB3:1963, GNAS:2077, GNGT1:2936, ADCYAP1R1:3836, GNG4:4297	0.128404
BIOCARTA_INFLAM_PATHWAY	-0.157631	0.00333371	0.012	0.0343588	29	PDGFA:706, IFNA1:875, IL15:990, IL12B:1150, IL7:1503, IL1A:2013, LTA:2139, IL12A:2863, IL5:3174, TNF:3304	0.128404
BIOCARTA_ATM_PATHWAY	-0.173869	0.00714279	0.013	0.0563487	20	NBN:549, ABL1:583, RELA:803, CDKN1A:1333, NFKBIA:1497, CHEK1:2785, TP53:3130, CHEK2:4150, RAD50:4515, ATM:5960	0.136664
PID_HEDGEHOG_2PATHWAY	-0.124962	0.042607	0.014	0.193779	22	PTCH1:1621, HHIP:1975, CDON:2291, AKT1:3757, SMO:4306, LRP2:5533, ARRB2:5904, PTHLH:6383, LRPAP1:6665, IHH:7078	0.140441
REACTOME_G2_M_CHECKPOINTS	-0.191346	2.30245e-05	0.015	0.000817368	41	RPA1:379, ORC2:387, RAD9A:725, RFC5:940, ATR:947, ORC3:974, CCNB1:1522, RPA2:1856, ORC6:2164, CDC7:2269	0.140441
REACTOME_ACTIVATION_OF_ATR_IN_RESPONSE_TO_REPLICATION_STRESS	-0.18677	0.000133874	0.015	0.00316836	35	RPA1:379, ORC2:387, RAD9A:725, RFC5:940, ATR:947, ORC3:974, RPA2:1856, ORC6:2164, CDC7:2269, CDC25C:2283	0.140441
BIOCARTA_RELA_PATHWAY	-0.230897	0.0013931	0.015	0.0191439	16	IKBKG:160, RELA:803, RIPK1:941, TRAF6:1024, NFKBIA:1497, TRADD:2422, TNF:3304, CHUK:4461, TNFRSF1B:4895, FADD:5774	0.140441
PID_CERAMIDE_PATHWAY	-0.107433	0.0101502	0.015	0.0697418	48	PRKCZ:246, PDGFA:706, RELA:803, TRAF2:896, EGF:919, RIPK1:941, IGF1:1014, CASP8:1146, NFKBIA:1497, MAP3K1:2324	0.140441
BIOCARTA_RNA_PATHWAY	-0.20863	0.0223779	0.015	0.120671	10	RELA:803, NFKBIA:1497, TP53:3130, CHUK:4461, EIF2S2:6645, DNAJC3:6843, NFKB1:8261, MAP3K14:8724, EIF2AK2:9969, EIF2S1:11722	0.140441
REACTOME_IL_6_SIGNALING	-0.196866	0.0311532	0.015	0.155329	10	IL6R:1539, IL6ST:2151, TYK2:2617, CBL:3597, IL6:5246, JAK2:7161, STAT3:7733, SOCS3:9232, STAT1:10553, JAK1:14368	0.140441
REACTOME_TRAF6_MEDIATED_IRF7_ACTIVATION	-0.211286	6.30062e-05	0.016	0.00182489	30	IRF1:179, IFNA1:875, TRAF2:896, IFIH1:969, TRAF6:1024, IFNA21:1232, SIKE1:1233, IFNA8:1246, IKBKE:1327, IFNA4:1812	0.1475
REACTOME_RECRUITMENT_OF_MITOTIC_CENTROSOME_PROTEINS_AND_COMPLEXES	-0.109903	0.00330356	0.017	0.0343247	60	CEP164:26, SDCCAG8:92, OFD1:267, PAFAH1B1:451, CDK5RAP2:684, FGFR1OP:737, TUBB4B:1203, CCNB1:1522, CEP135:3018, DYNC1I2:3797	0.154344
REACTOME_MITOTIC_PROMETAPHASE	-0.185222	1.12706e-08	0.018	1.53823e-06	80	KNTC1:1, CENPN:87, CASC5:196, XPO1:403, CDCA8:405, MLF1IP:416, PAFAH1B1:451, PPP2R5C:537, KIF2C:601, CENPT:626	0.156317
PID_RHOA_REG_PATHWAY	-0.15208	0.000570431	0.018	0.0105654	43	ARHGEF25:13, AKAP13:20, ARHGAP6:120, VAV2:222, MCF2:1189, ARHGEF5:1216, ARHGAP9:1604, VAV1:2038, ABR:2347, PLEKHG6:2664	0.156317
PID_TOLL_ENDOGENOUS_PATHWAY	-0.156223	0.00811756	0.018	0.0603153	24	IKBKG:160, VCAN:1096, IRAK1:1183, IRAK2:1373, TLR6:2849, TLR4:3084, IRAK4:3454, TLR3:3816, TIRAP:4172, TLR1:4441	0.156317
REACTOME_PRE_NOTCH_TRANSCRIPTION_AND_TRANSLATION	-0.198531	0.000989837	0.019	0.015427	23	MOV10:275, E2F3:419, MAMLD1:573, TNRC6B:1208, TNRC6C:1542, CCND1:1723, MAML3:1792, TP53:3130, MAML2:3366, KAT2B:3432	0.160354
PID_TRAIL_PATHWAY	-0.149784	0.00711338	0.019	0.0563487	27	CASP10:123, IKBKG:160, TNFSF10:423, TNFRSF10B:695, TRAF2:896, RIPK1:941, CASP8:1146, CFLAR:1412, TNFRSF10D:1460, MAP3K1:2324	0.160354
KEGG_CELL_CYCLE	-0.137119	2.69789e-07	0.02	2.02818e-05	119	CCNB3:59, CDK4:198, CDC25B:250, PTTG1:373, ORC2:387, E2F3:419, ABL1:583, E2F2:721, ESPL1:839, ATR:947	0.166449
BIOCARTA_RACCYCD_PATHWAY	-0.174614	0.00253119	0.021	0.0288396	25	IKBKG:160, CDK4:198, RELA:803, CDKN1A:1333, NFKBIA:1497, CCND1:1723, RAF1:2773, RB1:3246, AKT1:3757, CDK6:4360	0.167781
REACTOME_FACTORS_INVOLVED_IN_MEGAKARYOCYTE_DEVELOPMENT_AND_PLATELET_PRODUCTION	-0.0796446	0.00344465	0.021	0.0349386	114	SH2B3:175, IRF1:179, DOCK1:433, RCOR1:538, ABL1:583, KIF2C:601, IFNA1:875, CAPZA1:921, IFNA21:1232, IFNA8:1246	0.167781
BIOCARTA_PML_PATHWAY	-0.159217	0.0231125	0.021	0.123158	17	FASLG:557, SP100:1346, DAXX:1521, TP53:3130, RB1:3246, TNF:3304, PML:3726, TNFRSF1B:4895, HRAS:5714, TNFRSF1A:6943	0.167781
PID_NFKAPPAB_CANONICAL_PATHWAY	-0.174366	0.00570544	0.023	0.0479708	21	IKBKG:160, XPO1:403, RELA:803, TRAF6:1024, NFKBIA:1497, BIRC2:1941, MALT1:2143, CYLD:2232, TNF:3304, CHUK:4461	0.177546
BIOCARTA_FAS_PATHWAY	-0.142476	0.00697247	0.023	0.0560428	30	CASP10:123, FASLG:557, CASP8:1146, CFLAR:1412, DAXX:1521, CASP7:1615, SPTAN1:2174, MAP3K1:2324, RB1:3246, DFFA:3488	0.177546
BIOCARTA_G1_PATHWAY	-0.177778	0.00114214	0.024	0.0171724	28	CDK4:198, ABL1:583, ATR:947, SKP2:1027, CDKN1A:1333, CDKN2B:1414, CDKN2A:1545, CCND1:1723, TP53:3130, RB1:3246	0.177546
PID_CD8_TCR_DOWNSTREAM_PATHWAY	-0.111008	0.00218333	0.024	0.025836	64	NFATC2:38, TNFRSF9:200, FASLG:557, IFNA1:875, NFATC1:911, ELK1:1165, IFNA21:1232, IFNA8:1246, TNFRSF18:1593, IFNA4:1812	0.177546
PID_IL2_STAT5_PATHWAY	-0.156944	0.00295725	0.024	0.0323022	30	PTPN11:39, FASLG:557, SHC1:1107, SOS1:1341, LTA:2139, IL2RB:2361, ELF1:2752, GAB2:3599, CCND2:3619, CDK6:4360	0.177546
BIOCARTA_PARKIN_PATHWAY	-0.230701	0.0115531	0.024	0.0762196	10	SNCAIP:845, UBE2L6:2017, UBE2L3:2444, UBE2G2:3027, UBE2E2:3187, PARK2:4009, UBE2F:4491, GPR37:6063, SUMO1:12885, SNCA:17255	0.177546
KEGG_HOMOLOGOUS_RECOMBINATION	-0.188638	0.000699769	0.026	0.0120852	27	RPA4:193, RPA1:379, NBN:549, XRCC2:668, BLM:957, RAD51D:1589, RAD54B:1751, RPA2:1856, BRCA2:2576, POLD4:2711	0.185472
REACTOME_NRAGE_SIGNALS_DEATH_THROUGH_JNK	-0.122133	0.00565994	0.026	0.0479708	43	AKAP13:20, PLEKHG2:245, TIAM2:312, MCF2:1189, SOS1:1341, VAV1:2038, ABR:2347, FGD4:2394, ARHGEF4:2839, FGD3:2867	0.185472
BIOCARTA_IL12_PATHWAY	-0.164159	0.00773286	0.026	0.0591772	22	IL18:130, IL18R1:635, IL12B:1150, CXCR3:1517, TYK2:2617, IL12A:2863, IFNG:4722, IL12RB1:5897, MAPK14:6244, CD3D:6653	0.185472
PID_PLK1_PATHWAY	-0.179884	5.63126e-05	0.027	0.00167366	42	BORA:187, CDC25B:250, MLF1IP:416, PRC1:775, CDC14B:1290, SGOL1:1482, CCNB1:1522, GOLGA2:1675, SPC24:2110, CDC25C:2283	0.19034
BIOCARTA_G2_PATHWAY	-0.153469	0.00930944	0.028	0.0657319	24	CDC25B:250, ATR:947, CDKN1A:1333, CCNB1:1522, CDC25C:2283, CHEK1:2785, TP53:3130, CHEK2:4150, PLK1:4662, WEE1:4805	0.195094
REACTOME_E2F_ENABLED_INHIBITION_OF_PRE_REPLICATION_COMPLEX_FORMATION	-0.302987	0.000910473	0.029	0.0151115	10	ORC2:387, ORC3:974, CCNB1:1522, ORC6:2164, ORC1:2726, ORC5:4762, MCM8:5075, CDK1:7046, CDC25A:8359, ORC4:9755	0.199739
REACTOME_G1_PHASE	-0.21637	4.1755e-05	0.03	0.00136828	30	CDK4:198, E2F3:419, E2F2:721, SKP2:1027, CDKN1A:1333, CDKN2B:1414, CDKN2A:1545, E2F5:1683, CCND1:1723, RB1:3246	0.201842
REACTOME_DNA_REPLICATION	-0.122037	2.655e-08	0.031	2.80784e-06	177	KNTC1:1, CENPN:87, RPA4:193, CASC5:196, RPA1:379, ORC2:387, XPO1:403, CDCA8:405, MLF1IP:416, E2F3:419	0.201842
REACTOME_G_ALPHA1213_SIGNALLING_EVENTS	-0.10071	0.00476358	0.031	0.0441149	66	AKAP13:20, PLEKHG2:245, TIAM2:312, GNG7:869, GNG13:1103, MCF2:1189, SOS1:1341, GNB3:1963, VAV1:2038, ABR:2347	0.201842
PID_KIT_PATHWAY	-0.10454	0.00924299	0.031	0.0657319	52	PTPN11:39, SH2B3:175, GAB1:646, FER:671, MITF:731, SHC1:1107, SOS1:1341, VAV1:2038, KITLG:2069, RAF1:2773	0.201842
REACTOME_RIP_MEDIATED_NFKB_ACTIVATION_VIA_DAI	-0.163365	0.0164769	0.031	0.097942	18	IKBKG:160, S100B:369, RELA:803, RIPK1:941, NFKBIA:1497, NFKBIB:2882, NFKB2:3333, TLR3:3816, CHUK:4461, AGER:6149	0.201842
REACTOME_CLASS_B_2_SECRETIN_FAMILY_RECEPTORS	-0.0963365	0.00264198	0.032	0.029618	82	CD55:630, ADM:812, GCG:860, GNG7:869, GCGR:903, GNG13:1103, PTCH1:1621, VIPR2:1666, CALCRL:1784, WNT7A:1923	0.201842
BIOCARTA_TNFR1_PATHWAY	-0.135227	0.0118022	0.032	0.0764212	29	TRAF2:896, RIPK1:941, CASP8:1146, SPTAN1:2174, MAP3K1:2324, TRADD:2422, CRADD:2708, RB1:3246, TNF:3304, DFFA:3488	0.201842
REACTOME_HS_GAG_DEGRADATION	-0.151128	0.0193742	0.032	0.109296	20	SGSH:2500, GPC2:3188, GPC4:3291, GUSB:3501, HSPG2:3587, NAGLU:4366, GLB1:4602, SDC2:5058, GPC5:5880, IDUA:6403	0.201842
REACTOME_NFKB_ACTIVATION_THROUGH_FADD_RIP1_PATHWAY_MEDIATED_BY_CASPASE_8_AND10	-0.23896	0.00416698	0.033	0.0391574	12	CASP10:123, IKBKG:160, RIPK1:941, IFIH1:969, CASP8:1146, MAVS:3472, CHUK:4461, RNF135:5424, FADD:5774, DDX58:10591	0.205981
PID_P53_REGULATION_PATHWAY	-0.114206	0.00376238	0.035	0.0364266	54	ABL1:583, ATR:947, SKP2:1027, YY1:1339, DAXX:1521, CDKN2A:1545, MDM4:1870, TP53AIP1:2097, SMYD2:2242, RPL5:2654	0.213183
BIOCARTA_PTC1_PATHWAY	-0.229387	0.00845031	0.035	0.0620661	11	CDC25B:250, XPO1:403, CCNB1:1522, PTCH1:1621, CDC25C:2283, CDK1:7046, MNAT1:7230, SHH:7295, CDC25A:8359, CCNH:9469	0.213183
NABA_MATRISOME_ASSOCIATED	-0.0549696	1.03293e-06	0.036	6.00041e-05	722	CCL22:48, NRG4:49, PAPPA2:71, MMP25:106, IL18:130, ANGPT2:154, ADAM19:155, TNFSF15:161, TNFSF14:180, ADAM12:185	0.213183
PID_HES_HEY_PATHWAY	-0.0984401	0.018499	0.036	0.106494	48	GHR:436, YY1:1339, NEUROG3:1509, HES6:2064, GATA1:2910, BGLAP:3125, RB1:3246, NOTCH1:3252, MAML2:3366, ARNT:3535	0.213183
REACTOME_ADP_SIGNALLING_THROUGH_P2RY1	-0.14476	0.025108	0.036	0.132049	20	GNG7:869, GNG13:1103, PLA2G4A:1739, GNB3:1963, GNGT1:2936, GNA11:3352, GNA14:3663, GNAQ:3886, GNG4:4297, GNGT2:5800	0.213183
REACTOME_MITOTIC_M_M_G1_PHASES	-0.127148	4.62108e-08	0.037	4.21839e-06	157	KNTC1:1, CENPN:87, RPA4:193, CASC5:196, RPA1:379, ORC2:387, XPO1:403, CDCA8:405, MLF1IP:416, E2F3:419	0.213183
REACTOME_CELL_DEATH_SIGNALLING_VIA_NRAGE_NRIF_AND_NADE	-0.108633	0.00501188	0.037	0.0447915	56	AKAP13:20, PLEKHG2:245, TIAM2:312, TRAF6:1024, MCF2:1189, SOS1:1341, VAV1:2038, ABR:2347, FGD4:2394, ITGB3BP:2629	0.213183
PID_ANGIOPOIETIN_RECEPTOR_PATHWAY	-0.0911084	0.0260999	0.037	0.135043	50	PTPN11:39, ANGPT2:154, FN1:392, RELA:803, SHC1:1107, ELK1:1165, CRK:1250, CDKN1A:1333, DOK2:1463, ANGPT4:1518	0.213183
REACTOME_TRAF3_DEPENDENT_IRF_ACTIVATION_PATHWAY	-0.176721	0.0221103	0.038	0.119733	14	IFIH1:969, SIKE1:1233, IKBKE:1327, IRF3:2912, IRF7:2924, MAVS:3472, TRAF3:5068, RNF135:5424, EP300:8785, CREBBP:9218	0.21686
REACTOME_TOLL_RECEPTOR_CASCADES	-0.0666837	0.0166008	0.039	0.0982214	109	MEF2A:69, IKBKG:160, TLR10:223, S100B:369, RPS6KA5:559, MAPKAPK2:799, RELA:803, CTSK:841, RIPK1:941, TRAF6:1024	0.220467
REACTOME_G_ALPHA_S_SIGNALLING_EVENTS	-0.0686757	0.0120314	0.04	0.0772668	113	ADCY7:169, MC3R:586, NPS:758, ADM:812, GCG:860, LHB:863, GNG7:869, GCGR:903, GNG13:1103, MC2R:1321	0.222718
REACTOME_DEFENSINS	-0.168809	0.000269531	0.041	0.00583268	39	DEFB105A:238, DEFB119:1041, DEFB124:1451, DEFB126:1755, DEFB114:1919, DEFB136:2733, DEFB130:2869, DEFB113:3066, DEFB132:3394, DEFB135:3605	0.222718
REACTOME_SIGNALING_BY_ERBB4	-0.08287	0.00927168	0.041	0.0657319	83	NRG4:49, YAP1:270, S100B:369, GHR:436, AKT3:541, WWOX:643, RPS6KB2:691, EGF:919, SHC1:1107, TSC2:1156	0.222718
REACTOME_LOSS_OF_NLP_FROM_MITOTIC_CENTROSOMES	-0.0964502	0.0153362	0.041	0.0924513	53	CEP164:26, SDCCAG8:92, OFD1:267, PAFAH1B1:451, CDK5RAP2:684, FGFR1OP:737, TUBB4B:1203, CEP135:3018, DYNC1I2:3797, CENPJ:4161	0.222718
KEGG_BLADDER_CANCER	-0.125936	0.00480526	0.042	0.0441766	42	CDK4:198, E2F3:419, RPS6KA5:559, E2F2:721, EGF:919, CDKN1A:1333, CDKN2A:1545, CCND1:1723, PGF:2094, RAF1:2773	0.222718
REACTOME_NEGATIVE_REGULATORS_OF_RIG_I_MDA5_SIGNALING	-0.140809	0.0194989	0.042	0.109296	23	NLRC5:545, IFIH1:969, IKBKE:1327, RNF125:1835, UBE2L6:2017, CYLD:2232, IRF3:2912, MAVS:3472, OTUD5:4962, TRAF3:5068	0.222718
REACTOME_THROMBOXANE_SIGNALLING_THROUGH_TP_RECEPTOR	-0.146135	0.0319331	0.042	0.156362	18	GNG7:869, GNG13:1103, GNB3:1963, GNGT1:2936, GNA11:3352, GNA14:3663, GNAQ:3886, GNG4:4297, GNA13:4443, GNGT2:5800	0.222718
REACTOME_IL_3_5_AND_GM_CSF_SIGNALING	-0.0846135	0.0581495	0.043	0.234892	42	IL5RA:591, RAPGEF1:848, SHC1:1107, CRK:1250, SOS1:1341, VAV1:2038, IL2RB:2361, YWHAZ:3080, IL5:3174, CBL:3597	0.22602
KEGG_APOPTOSIS	-0.0862876	0.00708188	0.044	0.0563487	82	CASP10:123, IKBKG:160, TNFSF10:423, AKT3:541, FASLG:557, TNFRSF10B:695, RELA:803, TRAF2:896, RIPK1:941, PPP3CC:1012	0.226595
BIOCARTA_STEM_PATHWAY	-0.150229	0.0440561	0.044	0.19634	15	IL7:1503, IL9:2749, IL5:3174, EPO:3495, CD4:3879, IL6:5246, CSF3:6129, IL2:8194, IL3:8283, CD8A:9397	0.226595
BIOCARTA_NO2IL12_PATHWAY	-0.223525	0.00142735	0.045	0.0194059	17	IL12B:1150, CXCR3:1517, TYK2:2617, IL12A:2863, CD4:3879, IFNG:4722, CD2:4787, IL12RB1:5897, CD3D:6653, CD3G:7032	0.226595
REACTOME_PEPTIDE_HORMONE_BIOSYNTHESIS	-0.233768	0.00246832	0.045	0.0284191	14	CGB:225, CGB5:375, CGB8:460, LHB:863, POMC:2246, INHBC:2606, FSHB:2612, INHA:2890, INHBE:3764, CGA:8742	0.226595
BIOCARTA_IL1R_PATHWAY	-0.108166	0.0317137	0.045	0.156279	33	RELA:803, IFNA1:875, TRAF6:1024, IRAK1:1183, IRAK2:1373, NFKBIA:1497, ECSIT:1523, IL1A:2013, MAP3K1:2324, TNF:3304	0.226595
PID_TELOMERASE_PATHWAY	-0.106277	0.00289538	0.048	0.0320188	66	ACD:142, IRF1:179, DKC1:287, NBN:549, ABL1:583, RAD9A:725, EGF:919, BLM:957, CCND1:1723, IFNAR2:1817	0.234893
REACTOME_SIGNAL_ATTENUATION	-0.20543	0.0137701	0.048	0.0842019	12	INSR:413, SHC1:1107, CRK:1250, SOS1:1341, IRS1:2430, DOK1:3338, GRB10:4071, SHC2:4092, SHC3:7757, IRS2:14198	0.234893
REACTOME_SIGNALING_BY_ILS	-0.0669949	0.0198559	0.048	0.11033	102	IL18:130, IKBKG:160, IL5RA:591, RELA:803, RAPGEF1:848, TRAF6:1024, IL7R:1104, SHC1:1107, IRAK1:1183, CRK:1250	0.234893
BIOCARTA_TH1TH2_PATHWAY	-0.222601	0.000787692	0.049	0.0134223	19	IL18:130, CD28:342, IL18R1:635, IL12B:1150, CD40:2024, CD86:2837, IL12A:2863, CD40LG:3155, IL4R:4570, IFNG:4722	0.234893
REACTOME_MYOGENESIS	-0.138675	0.0144676	0.049	0.0876284	26	MEF2A:69, ABL1:583, CDON:2291, MYF5:2488, TCF4:3056, BNIP2:3911, NTN3:4380, TCF3:4766, MYOG:4802, NEO1:5436	0.234893
REACTOME_REGULATION_OF_HYPOXIA_INDUCIBLE_FACTOR_HIF_BY_OXYGEN	-0.161652	0.0252483	0.049	0.132243	16	HIF3A:240, CA9:1260, EPO:3495, ARNT:3535, EGLN3:3611, EGLN2:3683, EGLN1:5096, EPAS1:5334, VEGFA:6541, HIF1AN:8598	0.234893
PID_BETA_CATENIN_NUC_PATHWAY	-0.08615	0.00915485	0.05	0.0657319	77	SALL4:3, ADCY7:169, BCL9:337, XPO1:403, CAMK4:489, TBL1X:490, MITF:731, ZCCHC12:1015, APC:1066, VCAN:1096	0.2369
KEGG_INTESTINAL_IMMUNE_NETWORK_FOR_IGA_PRODUCTION	-0.133685	0.00173707	0.051	0.0221998	46	CD28:342, ITGB7:808, IL15:990, HLA-DPA1:1245, LTBR:1824, CD40:2024, CD80:2028, CCL28:2047, TNFSF13B:2310, CD86:2837	0.2369
PID_S1P_S1P3_PATHWAY	-0.12413	0.0231283	0.051	0.123158	28	GNAO1:426, AKT3:541, ITGAV:2736, GNA11:3352, GNA14:3663, AKT1:3757, GNAQ:3886, PDGFRB:4064, GNA13:4443, FLT1:5571	0.2369
BIOCARTA_AKT_PATHWAY	-0.134662	0.0327762	0.051	0.15927	21	IKBKG:160, GHR:436, FASLG:557, RELA:803, GH1:1436, NFKBIA:1497, AKT1:3757, FOXO4:3833, CHUK:4461, HSP90AA1:4929	0.2369
REACTOME_E2F_MEDIATED_REGULATION_OF_DNA_REPLICATION	-0.142737	0.00524795	0.053	0.0462327	32	ORC2:387, ORC3:974, CCNB1:1522, ORC6:2164, PRIM1:2701, ORC1:2726, RB1:3246, CDC6:3930, RRM2:3947, PPP2R3B:4565	0.243291
REACTOME_MITOTIC_G1_G1_S_PHASES	-0.103005	9.79363e-05	0.054	0.00245417	121	MYBL2:66, RPA4:193, CDK4:198, RPA1:379, ORC2:387, E2F3:419, E2F2:721, ORC3:974, SKP2:1027, PSMD4:1271	0.243291
KEGG_PROSTATE_CANCER	-0.0822505	0.0078549	0.054	0.0597533	88	IGF1R:94, IKBKG:160, FGFR2:391, E2F3:419, AKT3:541, PDGFA:706, E2F2:721, RELA:803, PDGFD:886, EGF:919	0.243291
NABA_PROTEOGLYCANS	-0.0891886	0.0722304	0.054	0.270705	34	ESM1:324, SRGN:698, ASPN:975, VCAN:1096, PODNL1:2082, IMPG1:2375, HSPG2:3587, OMD:4010, HAPLN2:4522, IMPG2:5253	0.243291
REACTOME_REGULATORY_RNA_PATHWAYS	-0.193377	0.00954498	0.055	0.0670246	15	POLR2G:384, DICER1:680, TARBP2:1075, TNRC6B:1208, TNRC6C:1542, POLR2E:3039, DGCR8:5390, POLR2F:6000, TNRC6A:6435, XPO5:6571	0.244935
REACTOME_BETA_DEFENSINS	-0.168622	0.000564526	0.056	0.0105654	35	DEFB105A:238, DEFB119:1041, DEFB124:1451, DEFB126:1755, DEFB114:1919, DEFB136:2733, DEFB130:2869, DEFB113:3066, DEFB132:3394, DEFB135:3605	0.244935
REACTOME_P75_NTR_RECEPTOR_MEDIATED_SIGNALLING	-0.0892522	0.00730433	0.056	0.0572695	76	AKAP13:20, PLEKHG2:245, TIAM2:312, RELA:803, TRAF6:1024, IRAK1:1183, MCF2:1189, SOS1:1341, NFKBIA:1497, VAV1:2038	0.244935
REACTOME_G_PROTEIN_ACTIVATION	-0.15351	0.0127479	0.056	0.0794724	22	OPRM1:344, GNAO1:426, GNG7:869, GNG13:1103, GNB3:1963, POMC:2246, GNGT1:2936, GNAT2:3629, PDYN:3952, GNG4:4297	0.244935
PID_IL6_7_PATHWAY	-0.0939089	0.0278061	0.057	0.141578	46	PTPN11:39, IRF1:179, PIAS3:616, GAB1:646, MITF:731, SOS1:1341, IL6R:1539, TIMP1:1611, VAV1:2038, IL6ST:2151	0.247503
REACTOME_ACTIVATION_OF_IRF3_IRF7_MEDIATED_BY_TBK1_IKK_EPSILON	-0.166948	0.0676102	0.059	0.259477	10	IKBKE:1327, IRF3:2912, IRF7:2924, TLR4:3084, TLR3:3816, TRAF3:5068, TICAM1:8012, CD14:8078, TBK1:16247, LY96:17253	0.254344
REACTOME_CHROMOSOME_MAINTENANCE	-0.113028	0.000108	0.06	0.00265432	99	CENPN:87, ACD:142, CASC5:196, DKC1:287, SYCP2:327, RPA1:379, SYNE2:397, MLF1IP:416, RSF1:525, HIST1H2BB:629	0.256807
SA_CASPASE_CASCADE	-0.153509	0.0206077	0.061	0.11255	19	CASP10:123, SREBF2:524, FASLG:557, CASP8:1146, CASP7:1615, BIRC2:1941, DFFA:3488, PRF1:5602, BIRC3:6125, CASP9:7210	0.25741
BIOCARTA_CERAMIDE_PATHWAY	-0.115718	0.0604435	0.061	0.241396	22	RELA:803, TRAF2:896, RIPK1:941, CASP8:1146, MAP3K1:2324, TRADD:2422, RAF1:2773, FADD:5774, BCL2:5991, TNFRSF1A:6943	0.25741
PID_FOXM1_PATHWAY	-0.128747	0.00489847	0.063	0.0443989	40	CDK4:198, CDC25B:250, FOXM1:362, SKP2:1027, LAMA4:1476, BIRC5:1507, CCNB1:1522, CDKN2A:1545, CCND1:1723, BRCA2:2576	0.26267
PID_LYSOPHOSPHOLIPID_PATHWAY	-0.0970829	0.00736814	0.064	0.0574176	64	LPAR2:80, ADCY7:169, GNAO1:426, MAPT:505, GAB1:646, RELA:803, CRK:1250, MAGI3:1486, NFKBIA:1497, TRIP6:1828	0.26267
BIOCARTA_KERATINOCYTE_PATHWAY	-0.0866896	0.044557	0.064	0.197722	45	FASLG:557, RELA:803, TRAF2:896, EGF:919, RIPK1:941, NFKBIA:1497, DAXX:1521, PRKCE:2178, ETS1:2317, MAP3K1:2324	0.26267
BIOCARTA_P38MAPK_PATHWAY	-0.0913085	0.0517556	0.064	0.217586	38	MEF2A:69, RPS6KA5:559, MAPKAPK2:799, TRAF2:896, RIPK1:941, SHC1:1107, ELK1:1165, DAXX:1521, PLA2G4A:1739, MAP3K1:2324	0.26267
BIOCARTA_IL6_PATHWAY	-0.143379	0.0199993	0.066	0.110645	22	PTPN11:39, SHC1:1107, ELK1:1165, SOS1:1341, IL6R:1539, IL6ST:2151, TYK2:2617, RAF1:2773, IL6:5246, JAK3:5473	0.267218
PID_P73PATHWAY	-0.0747819	0.0236783	0.066	0.125564	77	PPAP2A:143, YAP1:270, ABL1:583, UBE4B:598, WWOX:643, RELA:803, CDKN1A:1333, CCNB1:1522, TP63:1527, NEDD4L:1921	0.267218
BIOCARTA_LECTIN_PATHWAY	-0.271681	0.00181412	0.067	0.0228529	11	C5:594, C9:854, C7:1891, C3:2266, MASP2:2883, C6:5335, C8A:6454, C2:6544, C4B:8484, MASP1:8518	0.26765
KEGG_PRIMARY_IMMUNODEFICIENCY	-0.13228	0.00683137	0.067	0.0556082	35	IKBKG:160, AIRE:247, RFX5:345, IL7R:1104, CD40:2024, CD40LG:3155, BTK:3281, CD79A:3502, CIITA:3703, CD4:3879	0.26765
KEGG_PATHWAYS_IN_CANCER	-0.05605	0.000662952	0.068	0.0117674	320	IGF1R:94, IKBKG:160, CDK4:198, WNT8A:236, COL4A6:343, FGFR2:391, FN1:392, E2F3:419, AKT3:541, FASLG:557	0.268071
PID_BARD1_PATHWAY	-0.150122	0.00601622	0.068	0.0502531	28	FANCD2:446, NBN:549, ATR:947, FANCC:1568, TOPBP1:1762, FANCL:1776, FANCG:1985, UBE2L3:2444, TP53:3130, FANCF:3455	0.268071
SA_REG_CASCADE_OF_CYCLIN_EXPR	-0.230746	0.00566187	0.069	0.0479708	12	CDK4:198, E2F2:721, CDKN2A:1545, CCND1:1723, E2F4:4063, CDKN1B:4952, CCNA2:5874, E2F1:6377, CCNE2:9661, CCNA1:10053	0.26848
REACTOME_CYCLIN_A_B1_ASSOCIATED_EVENTS_DURING_G2_M_TRANSITION	-0.198873	0.00768621	0.069	0.0591745	15	CDC25B:250, XPO1:403, CCNB1:1522, CDC25C:2283, PKMYT1:3079, PLK1:4662, WEE1:4805, CCNA2:5874, CDK1:7046, MNAT1:7230	0.26848
PID_IL2_PI3K_PATHWAY	-0.128152	0.00979482	0.072	0.0680314	34	PTPN11:39, PRKCZ:246, RELA:803, SHC1:1107, SOS1:1341, IL2RB:2361, TERT:3390, RPS6:3438, GAB2:3599, AKT1:3757	0.278346
PID_SHP2_PATHWAY	-0.092293	0.0171182	0.074	0.100138	56	PTPN11:39, IGF1R:94, NTF4:463, GAB1:646, EGF:919, IGF1:1014, SHC1:1107, SOS1:1341, IL6R:1539, IL6ST:2151	0.284244
PID_DELTA_NP63_PATHWAY	-0.0760562	0.0747858	0.075	0.274645	46	HELLS:122, YAP1:270, TP63:1527, CDKN2A:1545, AXL:1619, ADRM1:1655, IL1A:2013, BRCA2:2576, FBXW7:2597, T:2631	0.28625
SIG_PIP3_SIGNALING_IN_B_LYMPHOCYTES	-0.0946382	0.0496968	0.077	0.212416	36	ITPR1:306, AKT3:541, GAB1:646, RPS6KA2:1092, CYTH3:1239, CDKN2A:1545, VAV1:2038, PITX2:2096, PPP1R13B:3184, BTK:3281	0.292024
REACTOME_INFLUENZA_LIFE_CYCLE	-0.0791905	0.0081889	0.078	0.0604937	94	NUP214:90, POLR2G:384, XPO1:403, RPS3:412, KPNA1:507, RPL28:745, RPL35:806, RPSA:872, NUP205:894, NUP50:1780	0.292118
REACTOME_PROLACTIN_RECEPTOR_SIGNALING	-0.205594	0.0136951	0.078	0.0841459	12	GHR:436, GH1:1436, PRL:2468, GH2:2599, CSH1:2977, CUL1:5190, PRLR:5878, JAK2:7161, STAT5B:9321, STAT5A:10800	0.292118
REACTOME_GPCR_LIGAND_BINDING	-0.0540319	0.000337231	0.08	0.00706527	385	C3AR1:8, XCR1:44, CCL22:48, LPAR2:80, GPR18:109, EDN1:170, CCRL1:183, XCL1:304, GRPR:316, XCL2:325	0.297748
PID_HIF1A_PATHWAY	-0.153934	0.0331095	0.081	0.16028	16	HIF3A:240, CDKN2A:1545, NAA10:1700, TP53:3130, ARNT:3535, EGLN3:3611, EGLN2:3683, HSP90AA1:4929, EGLN1:5096, HIF1AN:8598	0.29777
PID_TNF_PATHWAY	-0.0797175	0.0647107	0.081	0.252135	45	IKBKG:160, PRKCZ:246, RELA:803, NRK:879, TRAF2:896, RIPK1:941, CASP8:1146, BIRC2:1941, CYLD:2232, MAP3K1:2324	0.29777
REACTOME_ACTIVATION_OF_THE_PRE_REPLICATIVE_COMPLEX	-0.167955	0.00146929	0.083	0.0195266	30	RPA4:193, RPA1:379, ORC2:387, ORC3:974, RPA2:1856, ORC6:2164, CDC7:2269, PRIM1:2701, ORC1:2726, DBF4:2853	0.301403
REACTOME_G_ALPHA_Q_SIGNALLING_EVENTS	-0.0565342	0.0108239	0.083	0.0727795	173	ARHGEF25:13, XCR1:44, LPAR2:80, EDN1:170, XCL1:304, GRPR:316, XCL2:325, NPS:758, GNRH1:792, GCG:860	0.301403
BIOCARTA_CELLCYCLE_PATHWAY	-0.191585	0.00148207	0.084	0.0195266	23	CDK4:198, CDKN1A:1333, CDKN2B:1414, CCNB1:1522, CDKN2A:1545, CCND1:1723, RB1:3246, CCND2:3619, CDKN2C:3766, CDK6:4360	0.301403
BIOCARTA_DC_PATHWAY	-0.170484	0.00567247	0.084	0.0479708	22	IFNA1:875, IL12B:1150, TLR9:1289, CD40:2024, IL12A:2863, TLR4:3084, IL5:3174, CD7:4470, IFNG:4722, CD2:4787	0.301403
REACTOME_TAK1_ACTIVATES_NFKB_BY_PHOSPHORYLATION_AND_ACTIVATION_OF_IKKS_COMPLEX	-0.117508	0.0512578	0.087	0.217168	23	IKBKG:160, S100B:369, RELA:803, TRAF6:1024, IRAK1:1183, IRAK2:1373, NFKBIA:1497, NFKBIB:2882, NFKB2:3333, CHUK:4461	0.310309
PID_HIF2PATHWAY	-0.0924603	0.0663415	0.088	0.255375	33	BHLHE40:41, ELK1:1165, EFNA1:1774, ETS1:2317, EPO:3495, ARNT:3535, EGLN3:3611, EGLN2:3683, MMP14:4028, FXN:4561	0.312018
REACTOME_EXTENSION_OF_TELOMERES	-0.147535	0.00802354	0.089	0.0603153	27	DKC1:287, RPA1:379, RFC5:940, RPA2:1856, PRIM1:2701, POLD4:2711, TERT:3390, RPA3:4060, RUVBL1:4328, POLE:4358	0.313544
SIG_BCR_SIGNALING_PATHWAY	-0.0866812	0.0422866	0.09	0.193008	46	NFATC2:38, ITPR1:306, AKT3:541, NFATC1:911, PPP3CC:1012, SHC1:1107, SOS1:1341, VAV1:2038, RAF1:2773, PPP1R13B:3184	0.313544
ST_ADRENERGIC	-0.0973092	0.043596	0.09	0.196182	36	ITPR1:306, APC:1066, PITX2:2096, KCNJ5:2409, CCL16:2770, RAF1:2773, ITPKB:2931, PHKA2:3023, GNA11:3352, AKT1:3757	0.313544
NABA_MATRISOME	-0.0467934	1.67064e-06	0.091	8.89614e-05	994	IGSF10:16, ZP4:36, CCL22:48, NRG4:49, PAPPA2:71, CRIM1:77, MMP25:106, VWA3A:117, IL18:130, ANGPT2:154	0.315195
PID_CMYB_PATHWAY	-0.0659172	0.0396646	0.092	0.183992	82	PIAS3:616, CBX4:1174, CDKN1A:1333, CCNB1:1522, CDKN2A:1545, SND1:1697, CCND1:1723, TFEC:1779, COPA:1853, KITLG:2069	0.316827
BIOCARTA_P53HYPOXIA_PATHWAY	-0.110931	0.0718798	0.093	0.270184	22	RPA1:379, CDKN1A:1333, NFKBIB:2882, TP53:3130, AKT1:3757, HSP90AA1:4929, CSNK1A1:5163, IGFBP3:5359, TAF1:5870, ATM:5960	0.318228
REACTOME_GLYCOPROTEIN_HORMONES	-0.239531	0.0040777	0.094	0.0386022	12	CGB:225, CGB5:375, CGB8:460, LHB:863, INHBC:2606, FSHB:2612, INHA:2890, INHBE:3764, CGA:8742, TSHB:13211	0.318228
PID_IL3_PATHWAY	-0.125588	0.0333344	0.094	0.16076	24	PTPN11:39, SHC1:1107, SRP9:2905, CNKSR1:3065, YWHAZ:3080, GAB2:3599, PIM1:4256, INPP5D:5295, OSM:5394, CSF2RB:6035	0.318228
REACTOME_SIGNAL_AMPLIFICATION	-0.113432	0.0454688	0.096	0.201069	26	GNG7:869, GNG13:1103, PLA2G4A:1739, GNB3:1963, P2RY12:2173, GNGT1:2936, GNA11:3352, GNA14:3663, GNAQ:3886, GNG4:4297	0.323173
BIOCARTA_EPONFKB_PATHWAY	-0.130042	0.135445	0.097	0.377944	11	RELA:803, CDKN1A:1333, NFKBIA:1497, EPO:3495, ARNT:3535, JAK2:7161, NFKB1:8261, EPOR:11189, HIF1A:13905, SOD2:15945	0.324715
PID_NECTIN_PATHWAY	-0.092653	0.0900103	0.098	0.298837	28	VAV2:222, RAPGEF1:848, CRK:1250, PIP5K1C:1444, PTK2:2115, PVR:2155, F11R:2170, ITGAV:2736, MLLT4:3974, PDGFRB:4064	0.32624
REACTOME_HEMOSTASIS	-0.0353895	0.0139756	0.1	0.0850514	424	F8:114, ANGPT2:154, SLC16A1:157, SH2B3:175, IRF1:179, PRKCZ:246, FN1:392, DOCK1:433, GP5:528, PPP2R5C:537	0.32924
PID_GMCSF_PATHWAY	-0.0886003	0.0661578	0.1	0.255375	36	PTPN11:39, SHC1:1107, CCL2:1226, SOS1:1341, IRF8:1651, RAF1:2773, YWHAZ:3080, GAB2:3599, PIM1:4256, LYN:4321	0.32924
REACTOME_PROCESSIVE_SYNTHESIS_ON_THE_LAGGING_STRAND	-0.155496	0.0371463	0.102	0.175177	15	RPA1:379, RPA2:1856, PRIM1:2701, POLD4:2711, RPA3:4060, DNA2:5582, POLA2:6130, POLA1:7544, POLD3:8418, POLD1:9125	0.3303
REACTOME_G_ALPHA_I_SIGNALLING_EVENTS	-0.0647803	0.00254998	0.104	0.0288396	185	C3AR1:8, LPAR2:80, GPR18:109, ADCY7:169, OPRM1:344, C5:594, SSTR2:599, CXCL10:617, GNG7:869, RGS1:1009	0.3303
REACTOME_P75NTR_SIGNALS_VIA_NFKB	-0.146147	0.093373	0.104	0.304475	11	RELA:803, TRAF6:1024, IRAK1:1183, NFKBIA:1497, NGF:7640, RIPK2:7779, MYD88:7883, SQSTM1:9346, PRKCI:12880, NGFR:13121	0.3303
PID_ECADHERIN_NASCENT_AJ_PATHWAY	-0.097951	0.0517574	0.105	0.217586	33	VAV2:222, ITGB7:808, RAPGEF1:848, CRK:1250, PIP5K1C:1444, ITGAE:1657, CCND1:1723, WASF2:1821, TJP1:3547, AKT1:3757	0.3303
PID_FAS_PATHWAY	-0.0921183	0.0528017	0.106	0.220525	37	CASP10:123, IKBKG:160, FASLG:557, RIPK1:941, CASP8:1146, CFLAR:1412, BIRC2:1941, MAP3K1:2324, BTK:3281, AKT1:3757	0.3303
ST_GA13_PATHWAY	-0.0808056	0.093795	0.106	0.304475	36	IKBKG:160, AKT3:541, NFKBIA:1497, PTK2:2115, MAP3K1:2324, NFKBIB:2882, PHKA2:3023, NFKB2:3333, AKT1:3757, TONSL:4070	0.3303
PID_MET_PATHWAY	-0.0634982	0.0563191	0.107	0.231652	76	PTPN11:39, PRKCZ:246, RPTOR:295, GAB1:646, WASL:794, RAPGEF1:848, APC:1066, SHC1:1107, CRK:1250, SOS1:1341	0.3303
REACTOME_AKT_PHOSPHORYLATES_TARGETS_IN_THE_CYTOSOL	-0.150933	0.0703343	0.107	0.265154	12	AKT3:541, TSC2:1156, CDKN1A:1333, AKT1S1:3560, AKT1:3757, CHUK:4461, CDKN1B:4952, CASP9:7210, GSK3A:10839, MDM2:13376	0.3303
BIOCARTA_41BB_PATHWAY	-0.104992	0.134152	0.107	0.377944	17	TNFRSF9:200, RELA:803, TRAF2:896, NFKBIA:1497, MAP3K1:2324, CHUK:4461, IFNG:4722, MAPK14:6244, MAPK8:7853, IL2:8194	0.3303
REACTOME_CLASS_A1_RHODOPSIN_LIKE_RECEPTORS	-0.0557286	0.00126791	0.108	0.0180579	289	C3AR1:8, XCR1:44, CCL22:48, LPAR2:80, GPR18:109, EDN1:170, CCRL1:183, XCL1:304, GRPR:316, XCL2:325	0.3303
BIOCARTA_ERYTH_PATHWAY	-0.15779	0.0344378	0.109	0.165457	15	IGF1:1014, IL1A:2013, KITLG:2069, IL9:2749, EPO:3495, IL6:5246, CSF3:6129, FLT3:8147, IL3:8283, TGFB2:9493	0.3303
REACTOME_REMOVAL_OF_THE_FLAP_INTERMEDIATE_FROM_THE_C_STRAND	-0.17526	0.0550366	0.109	0.227627	10	RPA1:379, RPA2:1856, POLD4:2711, RPA3:4060, DNA2:5582, POLD3:8418, POLD1:9125, POLD2:10519, PCNA:10915, FEN1:14512	0.3303
PID_FGF_PATHWAY	-0.0694553	0.0753678	0.109	0.2752	55	PTPN11:39, KLB:116, FGFR2:391, GAB1:646, SHC1:1107, SOS1:1341, FGF19:1808, FGF4:2513, BGLAP:3125, FGF23:3521	0.3303
REACTOME_COMPLEMENT_CASCADE	-0.189008	0.000543326	0.11	0.0105208	28	C5:594, CD55:630, C9:854, CFH:1689, C7:1891, C3:2266, C8B:2740, MASP2:2883, PROS1:3533, CR1:4427	0.3303
SA_MMP_CYTOKINE_CONNECTION	-0.132672	0.0753647	0.11	0.2752	15	TNFSF8:323, IL6R:1539, ACE:2797, TNF:3304, TNFRSF1B:4895, SELL:6911, TNFRSF1A:6943, TNFRSF8:7302, TGFB2:9493, FCGR3A:10863	0.3303
KEGG_RNA_POLYMERASE	-0.110091	0.0621186	0.112	0.245158	24	POLR2G:384, ZNRD1:459, POLR1A:1865, POLR1E:1949, POLR3H:2864, POLR2E:3039, POLR1B:3239, POLR2F:6000, POLR3C:6233, POLR3B:6391	0.3303
REACTOME_THROMBIN_SIGNALLING_THROUGH_PROTEINASE_ACTIVATED_RECEPTORS_PARS	-0.0908252	0.102668	0.112	0.320024	27	GNG7:869, GNG13:1103, GNB3:1963, GNGT1:2936, GNA11:3352, GNA14:3663, GNAQ:3886, GNG4:4297, GNA13:4443, GNGT2:5800	0.3303
BIOCARTA_IL5_PATHWAY	-0.147974	0.105257	0.112	0.324924	10	IL5RA:591, IL5:3174, CCR3:3189, CD4:3879, IL6:5246, CCL11:6663, IL1B:11458, IL4:11902, HLA-DRB1:12390, HLA-DRA:14623	0.3303
REACTOME_RECRUITMENT_OF_NUMA_TO_MITOTIC_CENTROSOMES	-0.176949	0.0527355	0.113	0.220525	10	CCNB1:1522, TUBGCP6:4215, NEDD1:4765, NUMA1:4860, TUBGCP5:6320, TUBGCP2:6965, CDK1:7046, TUBG2:7966, TUBGCP3:11619, TUBG1:13259	0.3303
REACTOME_CHONDROITIN_SULFATE_BIOSYNTHESIS	-0.125568	0.0582635	0.113	0.234892	19	CHSY1:478, VCAN:1096, CHST3:2150, CHST13:2410, CHST12:2579, CHST9:3299, CHST7:4865, BGN:5579, BCAN:5976, DCN:6012	0.3303
REACTOME_PROSTACYCLIN_SIGNALLING_THROUGH_PROSTACYCLIN_RECEPTOR	-0.132491	0.0862171	0.113	0.291427	14	GNG7:869, GNG13:1103, GNB3:1963, GNAS:2077, GNGT1:2936, GNG4:4297, GNGT2:5800, GNB5:9719, GNB1:10176, GNG12:10997	0.3303
BIOCARTA_SET_PATHWAY	-0.146321	0.109201	0.113	0.331486	10	ANP32A:968, GZMA:3040, DFFA:3488, SET:4947, PRF1:5602, HMGB2:8512, DFFB:9150, CREBBP:9218, GZMB:11329, APEX1:17244	0.3303
REACTOME_ACTIVATED_TAK1_MEDIATES_P38_MAPK_ACTIVATION	-0.106087	0.130138	0.113	0.373745	17	IKBKG:160, MAPKAPK2:799, TRAF6:1024, IRAK1:1183, IRAK2:1373, MAPKAPK3:2914, MAPK14:6244, RIPK2:7779, NOD2:8755, NOD1:10285	0.3303
BIOCARTA_BCR_PATHWAY	-0.0966594	0.0627938	0.114	0.246167	31	NFATC2:38, NFATC1:911, PPP3CC:1012, SHC1:1107, ELK1:1165, SOS1:1341, VAV1:2038, MAP3K1:2324, RAF1:2773, BTK:3281	0.331606
REACTOME_ACTIVATED_TLR4_SIGNALLING	-0.058993	0.0594257	0.119	0.238824	86	MEF2A:69, IKBKG:160, S100B:369, RPS6KA5:559, MAPKAPK2:799, RELA:803, RIPK1:941, TRAF6:1024, RPS6KA2:1092, ELK1:1165	0.342821
BIOCARTA_RANKL_PATHWAY	-0.132403	0.0864248	0.119	0.291427	14	TNFRSF11A:184, RELA:803, TRAF6:1024, IFNAR2:1817, IFNAR1:6866, FOS:7524, MAPK8:7853, NFKB1:8261, IRF9:8691, EIF2AK2:9969	0.342821
PID_IL12_2PATHWAY	-0.0942248	0.0104614	0.121	0.070739	62	IL18:130, FASLG:557, STAT6:592, IL18R1:635, RELA:803, IL12B:1150, IL2RB:2361, TYK2:2617, IL12A:2863, CCL4:3019	0.346915
REACTOME_INTERFERON_SIGNALING	-0.0599635	0.0117207	0.122	0.0764212	150	NUP214:90, IRF1:179, ADAR:302, EIF4E2:404, STAT2:452, KPNA1:507, IFNA1:875, NUP205:894, EIF4E3:1007, IFNA21:1232	0.348117
KEGG_OOCYTE_MEIOSIS	-0.0661327	0.024189	0.123	0.127742	98	IGF1R:94, ADCY7:169, ITPR1:306, PTTG1:373, PLCZ1:443, PPP2R5C:537, SPDYC:600, CPEB1:683, ESPL1:839, ANAPC5:973	0.349307
REACTOME_INTERFERON_ALPHA_BETA_SIGNALING	-0.0974438	0.00810514	0.127	0.0603153	62	IRF1:179, ADAR:302, STAT2:452, IFNA1:875, IFNA21:1232, IFNA8:1246, GBP2:1555, IRF8:1651, IFNA4:1812, IFNAR2:1817	0.355092
BIOCARTA_CASPASE_PATHWAY	-0.121762	0.0433954	0.128	0.195969	23	CASP10:123, CASP8:1146, CASP7:1615, BIRC2:1941, DFFA:3488, CASP6:3906, CASP1:4077, PRF1:5602, BIRC3:6125, CASP2:6679	0.355092
BIOCARTA_CTLA4_PATHWAY	-0.121014	0.0611614	0.128	0.242746	20	PTPN11:39, CD28:342, CD80:2028, CTLA4:2827, CD86:2837, ITK:4156, ICOS:4842, ICOSLG:5257, CD3D:6653, CD3G:7032	0.355092
PID_IL5_PATHWAY	-0.134065	0.0825478	0.128	0.286299	14	PTPN11:39, IL5RA:591, IL5:3174, PIM1:4256, LYN:4321, CSF2RB:6035, JAK2:7161, STAT5B:9321, PIK3R1:9659, SDCBP:9938	0.355092
BIOCARTA_PTDINS_PATHWAY	-0.105389	0.0947722	0.128	0.304475	21	VAV2:222, PRKCZ:246, PFKL:1607, PRKCE:2178, BTK:3281, RAB5A:3449, GSK3B:3505, AKT1:3757, LYN:4321, PDPK1:5608	0.355092
REACTOME_REGULATION_OF_COMPLEMENT_CASCADE	-0.186105	0.0256493	0.129	0.133795	12	CD55:630, CFH:1689, C3:2266, PROS1:3533, CR1:4427, CFB:5556, C2:6544, C4BPA:8400, CD46:9240, CFHR3:10597	0.356217
REACTOME_G1_S_TRANSITION	-0.072146	0.0134572	0.13	0.0830835	99	RPA4:193, RPA1:379, ORC2:387, ORC3:974, SKP2:1027, PSMD4:1271, CDKN1A:1333, CCNB1:1522, RPA2:1856, ORC6:2164	0.357331
BIOCARTA_MTA3_PATHWAY	-0.114429	0.0843979	0.133	0.288397	19	PDZK1:499, TUBA4B:915, MTA3:1526, SNAI2:3624, MTA1:4144, CDH1:4281, TUBA4A:4654, SNAI1:5513, HSPB1:5645, ESR1:7775	0.36169
ST_INTERLEUKIN_4_PATHWAY	-0.0914576	0.106789	0.133	0.328859	26	AKT3:541, STAT6:592, SHC1:1107, SOS1:1341, TYK2:2617, PPP1R13B:3184, AKT1:3757, IL4R:4570, NR0B2:4791, INPP5D:5295	0.36169
KEGG_MELANOMA	-0.0809806	0.0194479	0.134	0.109296	70	IGF1R:94, CDK4:198, E2F3:419, AKT3:541, PDGFA:706, E2F2:721, MITF:731, PDGFD:886, EGF:919, IGF1:1014	0.36169
PID_IL12_STAT4_PATHWAY	-0.101932	0.0462164	0.134	0.201875	32	IL18:130, IRF1:179, CD28:342, IL18R1:635, PIAS2:1558, CD80:2028, CD86:2837, CD4:3879, IL18RAP:3914, IFNG:4722	0.36169
KEGG_NOD_LIKE_RECEPTOR_SIGNALING_PATHWAY	-0.0698474	0.0577181	0.137	0.234815	62	IL18:130, IKBKG:160, RELA:803, TRAF6:1024, CASP8:1146, CCL2:1226, NFKBIA:1497, TRIP6:1828, BIRC2:1941, MEFV:1953	0.368129
KEGG_P53_SIGNALING_PATHWAY	-0.0713113	0.0440512	0.138	0.19634	67	CCNB3:59, CDK4:198, TNFRSF10B:695, ATR:947, IGF1:1014, CASP8:1146, TSC2:1156, CDKN1A:1333, GTSE1:1379, CCNB1:1522	0.368545
BIOCARTA_MCM_PATHWAY	-0.123399	0.0700676	0.139	0.26493	18	ORC2:387, ORC3:974, KITLG:2069, ORC6:2164, ORC1:2726, CDC6:3930, ORC5:4762, CDKN1B:4952, MCM5:7429, ORC4:9755	0.368545
PID_TCPTP_PATHWAY	-0.0772222	0.0837963	0.139	0.287881	42	INSR:413, STAT6:592, GAB1:646, EGF:919, ATR:947, SHC1:1107, SOS1:1341, LMAN1:1548, KPNA2:3425, PDGFRB:4064	0.368545
REACTOME_G_BETA_GAMMA_SIGNALLING_THROUGH_PLC_BETA	-0.115915	0.120269	0.14	0.355482	15	GNG7:869, GNG13:1103, GNB3:1963, GNGT1:2936, GNG4:4297, GNGT2:5800, PLCB1:6489, PLCB2:7801, GNB5:9719, GNB1:10176	0.369561
REACTOME_DNA_REPAIR	-0.082251	0.00528166	0.142	0.0462327	97	OGG1:50, RPA1:379, POLR2G:384, ERCC4:442, FANCD2:446, NBN:549, FANCB:597, MGMT:649, MBD4:744, ZBTB32:910	0.373197
BIOCARTA_PS1_PATHWAY	-0.120016	0.120147	0.144	0.355482	14	APC:1066, DLL1:1532, NOTCH1:3252, GSK3B:3505, HNF1A:4090, ADAM17:4727, RBPJ:6302, PSEN1:8292, AXIN1:9381, FZD1:11484	0.376132
SA_G1_AND_S_PHASES	-0.176176	0.034649	0.145	0.165848	12	CDK4:198, E2F2:721, CDKN1A:1333, CDKN2A:1545, CCND1:1723, TP53:3130, CDKN1B:4952, E2F1:6377, CDK2:12985, MDM2:13376	0.376132
REACTOME_CS_DS_DEGRADATION	-0.139943	0.0933502	0.145	0.304475	12	VCAN:1096, BGN:5579, BCAN:5976, DCN:6012, IDUA:6403, HYAL1:6504, NCAN:7420, CSPG4:8987, ARSB:9211, IDS:10399	0.376132
BIOCARTA_ASBCELL_PATHWAY	-0.156422	0.0607138	0.147	0.24172	12	CD28:342, FASLG:557, CD40:2024, CD80:2028, CD40LG:3155, CD4:3879, IL2:8194, IL4:11902, FAS:11944, HLA-DRB1:12390	0.377379
PID_INSULIN_PATHWAY	-0.073138	0.0937473	0.147	0.304475	44	PTPN11:39, EXOC4:203, PRKCZ:246, INSR:413, EXOC7:569, RAPGEF1:848, SHC1:1107, CRK:1250, SOS1:1341, IRS1:2430	0.377379
BIOCARTA_FCER1_PATHWAY	-0.0863142	0.0775607	0.148	0.278784	35	NFATC2:38, NFATC1:911, PPP3CC:1012, SHC1:1107, ELK1:1165, SOS1:1341, PLA2G4A:1739, VAV1:2038, MAP3K1:2324, RAF1:2773	0.377379
BIOCARTA_HDAC_PATHWAY	-0.103515	0.0794262	0.148	0.281963	24	NFATC2:38, MEF2A:69, IGF1R:94, INSR:413, NFATC1:911, PPP3CC:1012, IGF1:1014, AKT1:3757, MAPK14:6244, MYOD1:6353	0.377379
BIOCARTA_MITOCHONDRIA_PATHWAY	-0.102453	0.104333	0.151	0.322853	21	CASP8:1146, CASP7:1615, BIRC2:1941, DFFA:3488, CASP6:3906, BCL2:5991, BIRC3:6125, BCL2L1:6875, BAX:7101, DIABLO:7155	0.38178
BIOCARTA_TEL_PATHWAY	-0.103817	0.138562	0.151	0.381045	17	IGF1R:94, TERF1:1854, TP53:3130, RB1:3246, TERT:3390, AKT1:3757, HSP90AA1:4929, BCL2:5991, TEP1:9673, MYC:10180	0.38178
REACTOME_MICRORNA_MIRNA_BIOGENESIS	-0.15129	0.0696725	0.152	0.264218	12	POLR2G:384, DICER1:680, TARBP2:1075, POLR2E:3039, DGCR8:5390, POLR2F:6000, XPO5:6571, POLR2D:6871, POLR2C:8716, POLR2A:14061	0.382693
SIG_CD40PATHWAYMAP	-0.0856281	0.0843655	0.153	0.288397	34	IKBKG:160, TRAF2:896, TRAF6:1024, NFKBIA:1497, TRAF5:1759, CD40:2024, NFKBIB:2882, MAPK8IP2:3296, NFKB2:3333, GORASP1:3653	0.383599
BIOCARTA_CARDIACEGF_PATHWAY	-0.120025	0.0868197	0.154	0.291988	17	EDN1:170, ADAM12:185, RELA:803, EGF:919, EDNRA:2057, EDNRB:4869, HRAS:5714, FOS:7524, NFKB1:8261, AGT:10028	0.384498
PID_MYC_PATHWAY	-0.124423	0.0350056	0.157	0.16693	24	SKP2:1027, CDKN2A:1545, SUPT7L:1922, SUPT3H:2006, FBXW7:2597, TAF10:2786, GSK3B:3505, PML:3726, PAK2:4175, KAT5:4195	0.389614
KEGG_UBIQUITIN_MEDIATED_PROTEOLYSIS	-0.0834558	0.00182394	0.158	0.0228529	118	AIRE:247, MID1:555, UBE4B:598, PIAS3:616, ANAPC5:973, TRAF6:1024, SKP2:1027, UBE2Q2:1145, ANAPC7:1530, PIAS2:1558	0.389614
ST_STAT3_PATHWAY	-0.118745	0.172796	0.158	0.430474	11	PIAS3:616, IL6R:1539, IL6:5246, JAK3:5473, JAK2:7161, STAT3:7733, REG1A:8624, SRC:11165, CISH:11495, PTPRU:13574	0.389614
REACTOME_CD28_DEPENDENT_VAV1_PATHWAY	-0.107577	0.238933	0.16	0.513145	10	CD28:342, CD80:2028, VAV1:2038, CD86:2837, PAK2:4175, RAC1:6451, LCK:13411, PAK1:14910, FYN:15154, GRB2:17959	0.392929
BIOCARTA_ARF_PATHWAY	-0.117337	0.0941178	0.161	0.304475	17	ABL1:583, CDKN2A:1545, POLR1A:1865, TP53:3130, POLR1B:3239, RB1:3246, E2F1:6377, RAC1:6451, TBX2:8337, POLR1D:8796	0.393771
PID_ARF6_PATHWAY	-0.0576412	0.25235	0.162	0.530998	33	EGF:919, CYTH3:1239, LHCGR:1740, EFNA1:1774, ACAP1:2124, PXN:3020, GNA11:3352, GNA14:3663, GNAQ:3886, EPHA2:5112	0.394606
KEGG_PROGESTERONE_MEDIATED_OOCYTE_MATURATION	-0.0620699	0.0513181	0.166	0.217168	83	CCNB3:59, IGF1R:94, ADCY7:169, CDC25B:250, AKT3:541, SPDYC:600, CPEB1:683, ANAPC5:973, IGF1:1014, RPS6KA2:1092	0.401885
BIOCARTA_COMP_PATHWAY	-0.202828	0.00290625	0.167	0.0320188	18	C5:594, C9:854, C7:1891, C3:2266, MASP2:2883, C6:5335, CFB:5556, C1S:6078, C8A:6454, C2:6544	0.401885
PID_CDC42_REG_PATHWAY	-0.0816552	0.135147	0.167	0.377944	28	ARHGEF25:13, VAV2:222, DNMBP:657, BCAR3:682, APC:1066, MCF2:1189, DOCK9:2560, ARHGEF6:2998, ARHGDIA:3466, RACGAP1:5161	0.401885
KEGG_O_GLYCAN_BIOSYNTHESIS	-0.0996529	0.0733448	0.168	0.271852	27	C1GALT1C1:176, GALNTL5:257, GCNT3:824, GALNT14:1987, GCNT1:4108, B4GALT5:4221, ST6GALNAC1:4324, ST3GAL1:4862, GALNT7:5191, GALNT3:5733	0.402674
BIOCARTA_IL2RB_PATHWAY	-0.0755694	0.107426	0.171	0.329235	38	FASLG:557, SHC1:1107, SOS1:1341, CFLAR:1412, IKZF3:2083, IL2RB:2361, IRS1:2430, RAF1:2773, CBL:3597, AKT1:3757	0.408232
REACTOME_NOD1_2_SIGNALING_PATHWAY	-0.0797715	0.137441	0.172	0.380195	29	IKBKG:160, TRAF6:1024, CASP8:1146, IRAK1:1183, IRAK2:1373, BIRC2:1941, CARD9:2040, CYLD:2232, CASP1:4077, CHUK:4461	0.408878
PID_MYC_ACTIV_PATHWAY	-0.0712173	0.03588	0.174	0.169832	73	CDK4:198, E2F3:419, NBN:549, IREB2:967, BIRC5:1507, CCNB1:1522, ID2:1705, BCAT1:1858, PTMA:1861, SUPT7L:1922	0.408878
REACTOME_SHC_MEDIATED_CASCADE	-0.0834823	0.126627	0.174	0.366128	28	KLB:116, FGFR2:391, SHC1:1107, SOS1:1341, FGF19:1808, FGF4:2513, FGF23:3521, KL:3712, FGF2:4349, FGFR3:4657	0.408878
BIOCARTA_TID_PATHWAY	-0.0948207	0.152714	0.174	0.405756	19	RELA:803, NFKBIA:1497, TP53:3130, RB1:3246, TNF:3304, DNAJA3:3315, IFNG:4722, TNFRSF1B:4895, TNFRSF1A:6943, JAK2:7161	0.408878
REACTOME_HYALURONAN_METABOLISM	-0.110218	0.1535	0.175	0.405926	14	HMMR:1228, GUSB:3501, HAS3:3730, SLC9A1:3945, STAB2:4206, HAS2:4497, HYAL1:6504, ABCC5:10518, HYAL2:11106, HEXA:11284	0.409504
PID_ATM_PATHWAY	-0.101567	0.0470016	0.176	0.204313	32	FANCD2:446, NBN:549, ABL1:583, RAD9A:725, BLM:957, CDC25C:2283, UIMC1:3844, CHEK2:4150, KAT5:4195, RAD50:4515	0.409504
REACTOME_LAGGING_STRAND_SYNTHESIS	-0.116357	0.0792928	0.177	0.281963	19	RPA1:379, RFC5:940, RPA2:1856, PRIM1:2701, POLD4:2711, RPA3:4060, DNA2:5582, POLA2:6130, POLA1:7544, POLD3:8418	0.409504
BIOCARTA_IL4_PATHWAY	-0.133247	0.126073	0.177	0.365356	11	STAT6:592, SHC1:1107, IRS1:2430, AKT1:3757, IL4R:4570, JAK3:5473, IL2RG:5921, IL4:11902, RPS6KB1:14190, JAK1:14368	0.409504
REACTOME_IL_RECEPTOR_SHC_SIGNALING	-0.085056	0.133639	0.179	0.377944	26	IL5RA:591, SHC1:1107, SOS1:1341, IL2RB:2361, IL5:3174, GAB2:3599, JAK3:5473, HRAS:5714, IL2RG:5921, CSF2RB:6035	0.410957
REACTOME_G_PROTEIN_BETA_GAMMA_SIGNALLING	-0.0874263	0.156042	0.179	0.406982	22	AKT3:541, GNG7:869, GNG13:1103, GNB3:1963, GNGT1:2936, AKT1:3757, GNG4:4297, PDPK1:5608, GNGT2:5800, PIK3R6:6433	0.410957
BIOCARTA_IL3_PATHWAY	-0.089301	0.247513	0.181	0.524579	14	SHC1:1107, SOS1:1341, RAF1:2773, HRAS:5714, CSF2RB:6035, JAK2:7161, FOS:7524, IL3:8283, STAT5B:9321, PTPN6:9368	0.411538
REACTOME_PRE_NOTCH_EXPRESSION_AND_PROCESSING	-0.0964643	0.0398793	0.182	0.183992	38	MOV10:275, RFNG:388, E2F3:419, MAMLD1:573, TNRC6B:1208, LFNG:1496, TNRC6C:1542, CCND1:1723, MAML3:1792, TP53:3130	0.411538
BIOCARTA_MET_PATHWAY	-0.0720387	0.1352	0.182	0.377944	36	PTPN11:39, DOCK1:433, GAB1:646, RAPGEF1:848, ELK1:1165, CRK:1250, SOS1:1341, PTK2:2115, RAF1:2773, PXN:3020	0.411538
REACTOME_HYALURONAN_UPTAKE_AND_DEGRADATION	-0.119868	0.189452	0.182	0.458097	10	HMMR:1228, GUSB:3501, SLC9A1:3945, STAB2:4206, HYAL1:6504, HYAL2:11106, HEXA:11284, LYVE1:11360, HEXB:12409, CD44:13393	0.411538
REACTOME_G_BETA_GAMMA_SIGNALLING_THROUGH_PI3KGAMMA	-0.0898607	0.175352	0.183	0.435991	19	AKT3:541, GNG7:869, GNG13:1103, GNB3:1963, GNGT1:2936, AKT1:3757, GNG4:4297, PDPK1:5608, GNGT2:5800, PIK3R6:6433	0.412243
KEGG_NEUROTROPHIN_SIGNALING_PATHWAY	-0.0506256	0.0575646	0.184	0.234815	119	PTPN11:39, SH2B3:175, NTF4:463, CAMK4:489, AKT3:541, FASLG:557, RPS6KA5:559, ABL1:583, GAB1:646, MAPKAPK2:799	0.412944
PID_SYNDECAN_3_PATHWAY	-0.0923361	0.187714	0.188	0.45695	17	CASK:1471, POMC:2246, MC4R:3805, PTN:4884, NCSTN:5385, AGRP:6769, NCAN:7420, PSEN1:8292, APH1B:8881, IL8:9652	0.420346
BIOCARTA_CLASSIC_PATHWAY	-0.22393	0.00519809	0.191	0.046133	13	C5:594, C9:854, C7:1891, C3:2266, C6:5335, C1S:6078, C8A:6454, C2:6544, C1QA:7547, C4B:8484	0.425466
REACTOME_POST_CHAPERONIN_TUBULIN_FOLDING_PATHWAY	-0.0989462	0.146358	0.193	0.39562	18	TUBB4B:1203, TBCE:2525, TUBA1B:2682, TUBB1:2988, TUBB2B:3059, TBCC:4558, TUBA4A:4654, TBCD:5992, TUBB3:7140, TUBA1A:8542	0.427383
REACTOME_GASTRIN_CREB_SIGNALLING_PATHWAY_VIA_PKC_AND_MAPK	-0.0418484	0.0460486	0.194	0.201875	194	ARHGEF25:13, XCR1:44, LPAR2:80, EDN1:170, XCL1:304, GRPR:316, XCL2:325, NPS:758, GNRH1:792, GCG:860	0.427383
PID_RET_PATHWAY	-0.0820072	0.0847113	0.194	0.288528	37	PTPN11:39, GAB1:646, SHC1:1107, CRK:1250, SOS1:1341, PTK2:2115, DOK5:2256, IRS1:2430, DOK6:2585, PXN:3020	0.427383
BIOCARTA_IL17_PATHWAY	-0.125145	0.0832266	0.195	0.286694	16	KITLG:2069, CD4:3879, CD2:4787, IL6:5246, CSF3:6129, CD3D:6653, IL17A:6916, CD3G:7032, CD58:7990, IL3:8283	0.428012
PID_RB_1PATHWAY	-0.0921284	0.0116298	0.196	0.0762196	63	CDK4:198, DNMT1:407, E2F3:419, ABL1:583, E2F2:721, MITF:731, SKP2:1027, CBX4:1174, CDKN1A:1333, CDKN2A:1545	0.428637
REACTOME_CELL_CYCLE_CHECKPOINTS	-0.0734091	0.00963041	0.198	0.067255	105	RPA1:379, ORC2:387, RAD9A:725, RFC5:940, ATR:947, ANAPC5:973, ORC3:974, PSMD4:1271, CDKN1A:1333, CCNB1:1522	0.431436
REACTOME_REGULATION_OF_INSULIN_SECRETION_BY_ACETYLCHOLINE	-0.129747	0.155507	0.199	0.406416	10	GNA11:3352, GNA14:3663, GNAQ:3886, PLCB1:6489, CHRM3:6737, PLCB2:7801, MARCKS:10051, GNA15:10250, PLCB3:12601, PRKCA:13129	0.432044
PID_PDGFRA_PATHWAY	-0.107331	0.0816011	0.2	0.284935	22	RAPGEF1:848, SHC1:1107, ELK1:1165, CRK:1250, SOS1:1341, ITGAV:2736, CAV3:4340, IFNG:4722, PDGFRA:4848, SHB:6460	0.432648
REACTOME_PHOSPHORYLATION_OF_THE_APC_C	-0.13967	0.053198	0.204	0.221015	16	ANAPC5:973, CCNB1:1522, ANAPC7:1530, CDC26:3095, ANAPC2:4054, PLK1:4662, CDC27:4923, CDK1:7046, CDC23:7191, ANAPC1:7441	0.438712
PID_S1P_S1P2_PATHWAY	-0.0988389	0.101083	0.205	0.317154	23	GNAO1:426, ELK1:1165, IRS1:2430, GNA11:3352, GNA14:3663, GNAQ:3886, GNA13:4443, GNAZ:6037, MAPK14:6244, RAC1:6451	0.438712
REACTOME_SYNTHESIS_OF_PIPS_AT_THE_GOLGI_MEMBRANE	-0.0908133	0.223529	0.205	0.494212	15	VAC14:563, OCRL:2539, PIK3R4:3751, PI4K2B:4124, INPP5E:6214, PIK3C3:7118, PIK3C2A:7615, PI4KB:7647, TPTE2:7884, PIK3C2G:8496	0.438712
KEGG_AUTOIMMUNE_THYROID_DISEASE	-0.101508	0.0123083	0.207	0.0784373	51	CD28:342, FASLG:557, IFNA1:875, IFNA21:1232, HLA-DPA1:1245, IFNA8:1246, IFNA4:1812, CD40:2024, CD80:2028, IFNA6:2627	0.439851
PID_NOTCH_PATHWAY	-0.0637796	0.0964872	0.207	0.307508	57	ADAM12:185, CNTN6:633, SKP2:1027, CDKN1A:1333, YY1:1339, DLL1:1532, CCND1:1723, MFAP2:2208, FBXW7:2597, NOTCH1:3252	0.439851
REACTOME_NOTCH_HLH_TRANSCRIPTION_PATHWAY	-0.115954	0.164423	0.208	0.41776	12	MAMLD1:573, MAML3:1792, MAML2:3366, KAT2B:3432, RBPJ:6302, NOTCH2:7448, NOTCH4:7828, MAML1:8533, CREBBP:9218, SNW1:13251	0.440414
REACTOME_MEIOSIS	-0.0738041	0.0204913	0.21	0.112394	83	ACD:142, CDK4:198, SYCP2:327, RPA1:379, SYNE2:397, NBN:549, HIST1H2BB:629, TEX12:666, ATR:947, BLM:957	0.443083
NABA_BASEMENT_MEMBRANES	-0.109531	0.0166799	0.212	0.0982347	40	COL4A6:343, PAPLN:595, LAMA4:1476, USH2A:1605, NTN5:2004, LAMA5:2424, NTN4:2976, NID1:3058, HSPG2:3587, LAMC3:4134	0.44478
PID_ER_NONGENOMIC_PATHWAY	-0.0671833	0.147104	0.213	0.39562	39	IGF1R:94, GNAO1:426, IGF1:1014, SHC1:1107, SOS1:1341, GNA11:3352, GNA14:3663, AKT1:3757, GNAQ:3886, GNA13:4443	0.44478
REACTOME_THE_ACTIVATION_OF_ARYLSULFATASES	-0.145045	0.082007	0.215	0.285572	12	SUMF1:932, ARSK:963, STS:1274, ARSG:1965, ARSJ:3506, ARSA:5275, ARSE:6156, SUMF2:6882, ARSB:9211, ARSF:15438	0.44478
KEGG_ALLOGRAFT_REJECTION	-0.107294	0.0260804	0.216	0.135043	36	CD28:342, FASLG:557, IL12B:1150, HLA-DPA1:1245, CD40:2024, CD80:2028, CD86:2837, IL12A:2863, CD40LG:3155, HLA-A:3165	0.44478
REACTOME_RNA_POL_III_TRANSCRIPTION	-0.106434	0.0404808	0.216	0.186095	31	GTF3C4:1010, BRF1:1308, POLR3E:2290, GTF3C5:2646, POLR3H:2864, POLR2E:3039, SNAPC2:3312, SNAPC4:3405, GTF3C2:3667, POU2F1:4572	0.44478
BIOCARTA_NFAT_PATHWAY	-0.0677912	0.101251	0.216	0.317154	49	NFATC2:38, EDN1:170, CAMK4:489, NFATC1:911, PPP3CC:1012, IGF1:1014, FKBP1A:1533, NPPA:1673, RAF1:2773, GSK3B:3505	0.44478
REACTOME_REGULATION_OF_KIT_SIGNALING	-0.101173	0.161383	0.216	0.414151	16	SOCS6:5, SH2B3:175, SOS1:1341, KITLG:2069, CBL:3597, LYN:4321, KIT:5213, YES1:5696, SH2B2:9068, PTPN6:9368	0.44478
KEGG_GLYCOSPHINGOLIPID_BIOSYNTHESIS_LACTO_AND_NEOLACTO_SERIES	-0.0864807	0.127252	0.217	0.367105	26	FUT9:283, GCNT2:2245, FUT1:2829, FUT5:3287, B3GNT5:3794, B3GNT4:4452, B3GNT2:5147, ABO:5195, FUT2:5549, FUT7:5845	0.445309
ST_B_CELL_ANTIGEN_RECEPTOR	-0.0771532	0.0917764	0.218	0.301517	40	AKT3:541, SHC1:1107, SOS1:1341, NFKBIA:1497, VAV1:2038, RAF1:2773, NFKBIB:2882, ITPKB:2931, PPP1R13B:3184, BTK:3281	0.445834
REACTOME_REGULATION_OF_IFNA_SIGNALING	-0.126707	0.0317939	0.219	0.156279	24	STAT2:452, IFNA1:875, IFNA21:1232, IFNA8:1246, IFNA4:1812, IFNAR2:1817, TYK2:2617, IFNA6:2627, IFNA10:4255, IFNA17:6031	0.446356
PID_E2F_PATHWAY	-0.0796772	0.018898	0.223	0.10782	73	MYBL2:66, E2F3:419, E2F2:721, CDKN1A:1333, YY1:1339, CDKN2A:1545, CASP7:1615, E2F5:1683, TOPBP1:1762, CES5A:1895	0.450405
REACTOME_INFLUENZA_VIRAL_RNA_TRANSCRIPTION_AND_REPLICATION	-0.0653865	0.0756302	0.223	0.275371	62	POLR2G:384, RPS3:412, RPL28:745, RPL35:806, RPSA:872, RPLP0:2298, RPL5:2654, POLR2E:3039, RPS24:3358, RPS3A:3384	0.450405
REACTOME_TIE2_SIGNALING	-0.106296	0.129383	0.224	0.372413	17	ANGPT2:154, SHC1:1107, SOS1:1341, DOK2:1463, ANGPT4:1518, ANGPT1:4008, HRAS:5714, GRB7:6245, NRAS:7867, PIK3R1:9659	0.450405
REACTOME_SIGNALING_BY_CONSTITUTIVELY_ACTIVE_EGFR	-0.0889678	0.233081	0.224	0.504969	15	GAB1:646, EGF:919, SHC1:1107, SOS1:1341, CBL:3597, HSP90AA1:4929, HRAS:5714, NRAS:7867, PIK3R1:9659, PIK3CA:11302	0.450405
KEGG_GLYCOSPHINGOLIPID_BIOSYNTHESIS_GLOBO_SERIES	-0.109912	0.170182	0.225	0.427293	13	FUT9:283, A4GALT:2390, FUT1:2829, ST3GAL1:4862, FUT2:5549, GLA:6534, NAGA:8443, ST3GAL2:9723, B3GALT5:10998, HEXA:11284	0.450405
REACTOME_REPAIR_SYNTHESIS_FOR_GAP_FILLING_BY_DNA_POL_IN_TC_NER	-0.129	0.0948208	0.226	0.304475	14	RPA1:379, RFC5:940, RPA2:1856, POLD4:2711, RPA3:4060, POLE:4358, POLD3:8418, POLD1:9125, RFC2:9872, POLD2:10519	0.450405
REACTOME_CHONDROITIN_SULFATE_DERMATAN_SULFATE_METABOLISM	-0.0579376	0.170095	0.227	0.427293	47	CHSY1:478, VCAN:1096, CHST3:2150, CHST13:2410, CHST12:2579, GPC2:3188, GPC4:3291, CHST9:3299, HSPG2:3587, GXYLT1:3825	0.450405
REACTOME_REGULATED_PROTEOLYSIS_OF_P75NTR	-0.121753	0.182584	0.227	0.449601	10	RELA:803, TRAF6:1024, ADAM17:4727, NCSTN:5385, PSEN1:8292, APH1B:8881, PSEN2:11703, APH1A:11901, PSENEN:12534, NGFR:13121	0.450405
REACTOME_SIGNALING_BY_SCF_KIT	-0.0527131	0.115481	0.231	0.344824	75	SOCS6:5, SH2B3:175, AKT3:541, FER:671, RPS6KB2:691, TSC2:1156, CDKN1A:1333, SOS1:1341, VAV1:2038, KITLG:2069	0.454308
REACTOME_APC_C_CDC20_MEDIATED_DEGRADATION_OF_CYCLIN_B	-0.126148	0.0807854	0.232	0.283092	16	ANAPC5:973, CCNB1:1522, ANAPC7:1530, CDC26:3095, ANAPC2:4054, CDC27:4923, CDK1:7046, CDC23:7191, ANAPC1:7441, CDC20:9014	0.454308
PID_TCR_PATHWAY	-0.0613967	0.0901319	0.232	0.298837	64	PTPN11:39, IKBKG:160, CD28:342, TRAF6:1024, SHC1:1107, SOS1:1341, CD80:2028, VAV1:2038, MALT1:2143, PRKCE:2178	0.454308
REACTOME_SIGNALING_BY_RHO_GTPASES	-0.0396928	0.15391	0.232	0.405926	109	AKAP13:20, ARHGAP6:120, PLEKHG2:245, TIAM2:312, ARHGAP30:566, MCF2:1189, SOS1:1341, TAGAP:1407, RAC3:1742, VAV1:2038	0.454308
PID_AURORA_A_PATHWAY	-0.0748297	0.163509	0.235	0.41776	29	CDC25B:250, CPEB1:683, NFKBIA:1497, BIRC5:1507, AURKA:2586, TP53:3130, GSK3B:3505, AKT1:3757, AURKAIP1:3967, TACC3:4331	0.458684
BIOCARTA_D4GDI_PATHWAY	-0.101811	0.203898	0.237	0.472925	13	CASP10:123, CASP8:1146, CASP1:4077, PRF1:5602, CASP9:7210, PARP1:7811, ARHGAP5:8855, ARHGDIB:9870, GZMB:11329, CASP3:11432	0.461086
REACTOME_HOMOLOGOUS_RECOMBINATION_REPAIR_OF_REPLICATION_INDEPENDENT_DOUBLE_STRAND_BREAKS	-0.128836	0.0745299	0.239	0.274595	16	RPA1:379, NBN:549, RPA2:1856, BRIP1:2101, BRCA2:2576, RPA3:4060, RAD50:4515, ATM:5960, MDC1:6501, BRCA1:7085	0.463472
REACTOME_TRANSPORT_OF_MATURE_MRNA_DERIVED_FROM_AN_INTRONLESS_TRANSCRIPT	-0.111184	0.0296793	0.24	0.149331	32	NUP214:90, CPSF2:192, NUP205:894, CPSF1:1204, NUP50:1780, NUP188:1801, NUP93:3529, TPR:3645, NUP133:4445, NUP210:5303	0.46391
REACTOME_INTERFERON_GAMMA_SIGNALING	-0.0549472	0.141865	0.243	0.38823	60	IRF1:179, HLA-DPA1:1245, SP100:1346, GBP2:1555, IRF8:1651, IRF4:2009, IRF3:2912, IRF7:2924, IRF5:2929, HLA-A:3165	0.466058
REACTOME_S_PHASE	-0.0536601	0.0646994	0.244	0.252135	100	CDK4:198, CDC25B:250, RPA1:379, ORC2:387, RFC5:940, ORC3:974, SKP2:1027, PSMD4:1271, CDKN1A:1333, CCND1:1723	0.466058
REACTOME_ADP_SIGNALLING_THROUGH_P2RY12	-0.0935012	0.195581	0.244	0.464597	16	GNG7:869, GNG13:1103, GNB3:1963, P2RY12:2173, GNGT1:2936, GNG4:4297, GNGT2:5800, GNB5:9719, GNB1:10176, GNAI2:10229	0.466058
PID_ILK_PATHWAY	-0.0624267	0.152572	0.245	0.405756	44	XPO1:403, CCND1:1723, ELMO2:1826, GIT2:2313, ILK:2474, AURKA:2586, TNS1:2939, ARHGEF6:2998, PXN:3020, GSK3B:3505	0.466058
ST_PHOSPHOINOSITIDE_3_KINASE_PATHWAY	-0.0685456	0.155181	0.245	0.406416	36	AKT3:541, CD55:630, RPS6KA2:1092, SHC1:1107, CYTH3:1239, SOS1:1341, CDKN2A:1545, YWHAZ:3080, PPP1R13B:3184, BTK:3281	0.466058
KEGG_B_CELL_RECEPTOR_SIGNALING_PATHWAY	-0.0599269	0.0774576	0.246	0.278784	73	NFATC2:38, IKBKG:160, VAV2:222, AKT3:541, RELA:803, NFATC1:911, PPP3CC:1012, CD72:1148, SOS1:1341, NFKBIA:1497	0.466479
REACTOME_O_LINKED_GLYCOSYLATION_OF_MUCINS	-0.0696306	0.095689	0.247	0.30577	48	C1GALT1C1:176, ST6GALNAC2:211, GALNTL5:257, GCNT3:824, B3GNT9:1504, B3GNTL1:1798, GALNT14:1987, MUCL1:3585, B3GNT5:3794, GCNT1:4108	0.466875
PID_S1P_META_PATHWAY	-0.0756605	0.230351	0.249	0.503033	21	GNAO1:426, GNA11:3352, GNA14:3663, GNAQ:3886, GNA13:4443, GNAZ:6037, S1PR1:6131, SGPP1:7351, S1PR4:7497, S1PR3:7654	0.466875
REACTOME_PROCESSING_OF_CAPPED_INTRONLESS_PRE_MRNA	-0.119788	0.0874464	0.25	0.293324	17	CPSF2:192, CPSF1:1204, CSTF2:1300, SLBP:1359, ZNF473:3170, NCBP1:5597, CPSF7:6087, LSM11:6119, PAPOLA:7069, PCF11:7431	0.466875
BIOCARTA_TCAPOPTOSIS_PATHWAY	-0.161562	0.0769552	0.251	0.278608	10	CD28:342, FASLG:557, CD4:3879, CD3D:6653, CD3G:7032, CCR5:7618, CD3E:8590, CD247:11525, FAS:11944, TRA@:12773	0.466875
REACTOME_N_GLYCAN_TRIMMING_IN_THE_ER_AND_CALNEXIN_CALRETICULIN_CYCLE	-0.117429	0.142804	0.251	0.388694	13	EDEM1:147, UGGT2:2997, EDEM3:4237, EDEM2:5228, CALR:7700, MOGS:7735, PRKCSH:9351, MLEC:10445, GANAB:10955, MAN1B1:10992	0.466875
BIOCARTA_FMLP_PATHWAY	-0.0649659	0.197011	0.253	0.464917	33	NFATC2:38, RELA:803, NFATC1:911, PPP3CC:1012, ELK1:1165, NFKBIA:1497, MAP3K1:2324, RAF1:2773, GNGT1:2936, FPR1:5328	0.466875
REACTOME_A_TETRASACCHARIDE_LINKER_SEQUENCE_IS_REQUIRED_FOR_GAG_SYNTHESIS	-0.0708315	0.220618	0.253	0.493783	25	VCAN:1096, GPC2:3188, GPC4:3291, HSPG2:3587, GXYLT1:3825, SDC2:5058, BGN:5579, GPC5:5880, BCAN:5976, DCN:6012	0.466875
REACTOME_G0_AND_EARLY_G1	-0.113193	0.0662709	0.254	0.255375	22	MYBL2:66, E2F5:1683, CDC6:3930, E2F4:4063, LIN37:5078, CCNA2:5874, E2F1:6377, CDK1:7046, DYRK1A:7478, RBL2:7714	0.466875
KEGG_RIBOSOME	-0.0659305	0.0943934	0.254	0.304475	54	RPS3:412, RPL28:745, RPL35:806, RPSA:872, RPLP0:2298, RPL5:2654, RPS24:3358, RPS3A:3384, RPS6:3438, RPL26:3573	0.466875
REACTOME_SIGNALING_BY_HIPPO	-0.081119	0.209451	0.254	0.480347	20	WWTR1:4, YAP1:270, AMOTL1:527, DVL2:1344, LATS1:1353, NPHP4:2533, TJP1:3547, AMOT:5160, LATS2:6418, SAV1:10954	0.466875
REACTOME_GLYCOSAMINOGLYCAN_METABOLISM	-0.0445755	0.110938	0.258	0.333599	108	CHSY1:478, VCAN:1096, HMMR:1228, CHST3:2150, CHST13:2410, SGSH:2500, CHST12:2579, GPC2:3188, GPC4:3291, CHST9:3299	0.471335
REACTOME_CALNEXIN_CALRETICULIN_CYCLE	-0.126235	0.147262	0.258	0.39562	11	EDEM1:147, UGGT2:2997, EDEM3:4237, EDEM2:5228, CALR:7700, PRKCSH:9351, GANAB:10955, MAN1B1:10992, CANX:11184, PDIA3:11405	0.471335
REACTOME_RNA_POL_III_TRANSCRIPTION_INITIATION_FROM_TYPE_2_PROMOTER	-0.106369	0.0917399	0.261	0.301517	21	GTF3C4:1010, BRF1:1308, POLR3E:2290, GTF3C5:2646, POLR3H:2864, POLR2E:3039, GTF3C2:3667, GTF3C3:4856, POLR2F:6000, POLR3C:6233	0.475367
REACTOME_G1_S_SPECIFIC_TRANSCRIPTION	-0.0887326	0.205528	0.262	0.475841	17	ORC1:2726, CDC6:3930, RRM2:3947, FBXO5:6021, E2F1:6377, CDK1:7046, POLA1:7544, TFDP1:7973, CDC25A:8359, TK2:8398	0.475742
BIOCARTA_PTEN_PATHWAY	-0.104596	0.124671	0.266	0.363765	18	FASLG:557, SHC1:1107, SOS1:1341, PTK2:2115, ILK:2474, AKT1:3757, CDKN1B:4952, PDPK1:5608, BCAR1:6967, PIK3R1:9659	0.480096
REACTOME_BASE_FREE_SUGAR_PHOSPHATE_REMOVAL_VIA_THE_SINGLE_NUCLEOTIDE_REPLACEMENT_PATHWAY	-0.11458	0.209729	0.266	0.480347	10	OGG1:50, MBD4:744, NTHL1:1025, CCNO:3622, MUTYH:7708, TDG:9145, MPG:10308, POLB:12684, SMUG1:15713, APEX1:17244	0.480096
REACTOME_TRANSPORT_OF_RIBONUCLEOPROTEINS_INTO_THE_HOST_NUCLEUS	-0.114391	0.039829	0.267	0.183992	27	NUP214:90, KPNA1:507, NUP205:894, NUP50:1780, NUP188:1801, NUP93:3529, TPR:3645, NUP133:4445, NUP210:5303, NUP37:5388	0.480453
BIOCARTA_IL10_PATHWAY	-0.0948028	0.189432	0.268	0.458097	16	STAT2:452, STAT6:592, IL10RA:1348, IL1A:2013, TNF:3304, IL6:5246, STAT3:7733, STAT5B:9321, STAT4:9370, STAT1:10553	0.480809
PID_AP1_PATHWAY	-0.0406339	0.240973	0.269	0.514988	70	NFATC2:38, EDN1:170, NFATC1:911, CCL2:1226, CDKN2A:1545, TIMP1:1611, NPPA:1673, CCND1:1723, TRIP6:1828, ETS1:2317	0.481162
REACTOME_DEPOSITION_OF_NEW_CENPA_CONTAINING_NUCLEOSOMES_AT_THE_CENTROMERE	-0.0773489	0.0730747	0.271	0.271852	45	CENPN:87, CASC5:196, MLF1IP:416, RSF1:525, HIST1H2BB:629, OIP5:672, MIS18A:780, CENPH:1162, CENPQ:1974, CENPP:2312	0.483297
PID_ERBB_NETWORK_PATHWAY	-0.0962192	0.197171	0.272	0.464917	15	NRG4:49, EGF:919, BTC:3525, NRG1:4214, HSP90AA1:4929, EREG:5478, NRG2:5496, ERBB2:7715, ERBB3:9324, HBEGF:10999	0.483641
BIOCARTA_CHEMICAL_PATHWAY	-0.0690205	0.262768	0.274	0.541642	22	CASP7:1615, PTK2:2115, PXN:3020, TP53:3130, AKT1:3757, CASP6:3906, ATM:5960, BCL2:5991, BCL2L1:6875, BAX:7101	0.485756
REACTOME_NRIF_SIGNALS_CELL_DEATH_FROM_THE_NUCLEUS	-0.0990674	0.234887	0.275	0.507071	12	TRAF6:1024, ITGB3BP:2629, NCSTN:5385, NGF:7640, MAPK8:7853, PSEN1:8292, APH1B:8881, SQSTM1:9346, PSEN2:11703, APH1A:11901	0.486091
REACTOME_METABOLISM_OF_NON_CODING_RNA	-0.0890433	0.0488386	0.277	0.210259	41	NUP214:90, GEMIN5:861, NUP205:894, NUP50:1780, NUP188:1801, GEMIN4:2899, NUP93:3529, TPR:3645, TGS1:4423, NUP133:4445	0.486754
PID_NFAT_TFPATHWAY	-0.0533249	0.206706	0.277	0.476841	47	NFATC2:38, CDK4:198, FASLG:557, NFATC1:911, DGKA:1811, IRF4:2009, CTLA4:2827, CD40LG:3155, IL5:3174, TNF:3304	0.486754
KEGG_GRAFT_VERSUS_HOST_DISEASE	-0.0875561	0.0733874	0.278	0.271852	35	CD28:342, FASLG:557, HLA-DPA1:1245, IL1A:2013, CD80:2028, KIR3DL2:2273, CD86:2837, HLA-A:3165, TNF:3304, HLA-F:3728	0.487083
KEGG_CHRONIC_MYELOID_LEUKEMIA	-0.0574967	0.090259	0.282	0.298837	73	PTPN11:39, IKBKG:160, CDK4:198, E2F3:419, AKT3:541, ABL1:583, E2F2:721, RELA:803, SHC1:1107, CRK:1250	0.492651
PID_AVB3_OPN_PATHWAY	-0.0710979	0.185543	0.283	0.452562	29	RELA:803, NFKBIA:1497, MAP3K1:2324, ILK:2474, ITGAV:2736, PIP5K1A:2986, CHUK:4461, SPP1:4764, RAC1:6451, BCAR1:6967	0.492961
PID_ENDOTHELIN_PATHWAY	-0.0529344	0.153658	0.286	0.405926	61	ADCY7:169, EDN1:170, GNAO1:426, CRK:1250, TRPC6:1315, PLA2G4A:1739, EDNRA:2057, PRKCE:2178, RAF1:2773, GNA11:3352	0.496742
REACTOME_NEP_NS2_INTERACTS_WITH_THE_CELLULAR_EXPORT_MACHINERY	-0.112295	0.0476762	0.29	0.206543	26	NUP214:90, XPO1:403, NUP205:894, NUP50:1780, NUP188:1801, NUP93:3529, TPR:3645, NUP133:4445, NUP210:5303, NUP37:5388	0.502234
BIOCARTA_ERK_PATHWAY	-0.0740559	0.18328	0.293	0.450168	27	IGF1R:94, RPS6KA5:559, SHC1:1107, ELK1:1165, SOS1:1341, GNAS:2077, RAF1:2773, GNGT1:2936, MKNK2:3041, PDGFRA:4848	0.503068
REACTOME_RNA_POL_I_TRANSCRIPTION_INITIATION	-0.0770785	0.201022	0.293	0.468808	23	TAF1C:103, RRN3:740, TAF1B:844, POLR1A:1865, POLR1B:3239, KAT2B:3432, UBTF:4781, EHMT2:6360, GTF2H3:6930, MNAT1:7230	0.503068
ST_T_CELL_SIGNAL_TRANSDUCTION	-0.0538863	0.211783	0.293	0.483996	45	CD28:342, SOS1:1341, NFKBIA:1497, VAV1:2038, FBXW7:2597, RAF1:2773, CTLA4:2827, NFKBIB:2882, ITPKB:2931, DTYMK:3301	0.503068
BIOCARTA_IL2_PATHWAY	-0.0702241	0.254536	0.295	0.532034	22	SHC1:1107, ELK1:1165, SOS1:1341, IL2RB:2361, RAF1:2773, JAK3:5473, HRAS:5714, IL2RG:5921, FOS:7524, MAPK8:7853	0.504518
REACTOME_PI3K_EVENTS_IN_ERBB2_SIGNALING	-0.0653745	0.143251	0.296	0.388694	42	NRG4:49, AKT3:541, GAB1:646, RPS6KB2:691, EGF:919, TSC2:1156, CDKN1A:1333, BTC:3525, AKT1S1:3560, AKT1:3757	0.504518
REACTOME_INITIAL_TRIGGERING_OF_COMPLEMENT	-0.129974	0.119126	0.299	0.35488	12	C3:2266, MASP2:2883, CFB:5556, C1S:6078, C2:6544, C1QA:7547, MASP1:8518, CFD:10010, MBL2:10425, C1QB:10578	0.504518
BIOCARTA_CXCR4_PATHWAY	-0.0675148	0.252619	0.301	0.530998	24	RELA:803, CRK:1250, PTK2:2115, RAF1:2773, GNGT1:2936, PXN:3020, GNAQ:3886, HRAS:5714, CXCR4:6487, BCAR1:6967	0.504518
SIG_IL4RECEPTOR_IN_B_LYPHOCYTES	-0.0838195	0.132025	0.302	0.377944	27	AKT3:541, STAT6:592, SHC1:1107, SOS1:1341, IRS1:2430, RAF1:2773, PPP1R13B:3184, MAP4K1:3379, GSK3B:3505, AKT1:3757	0.504518
REACTOME_SYNTHESIS_OF_GLYCOSYLPHOSPHATIDYLINOSITOL_GPI	-0.0812877	0.246153	0.302	0.522565	17	PIGM:631, PIGP:716, PIGN:2060, PIGA:4160, PIGL:4533, PIGC:5099, PIGQ:6434, DPM2:7084, PIGW:8377, PIGB:8816	0.504518
BIOCARTA_CALCINEURIN_PATHWAY	-0.0662339	0.374675	0.302	0.64101	15	NFATC2:38, NFATC1:911, PPP3CC:1012, CDKN1A:1333, GNAQ:3886, SP3:6066, SP1:6637, NFATC3:7289, MARCKS:10051, PRKCA:13129	0.504518
BIOCARTA_P53_PATHWAY	-0.108079	0.134645	0.304	0.377944	16	CDK4:198, CDKN1A:1333, CCND1:1723, TP53:3130, RB1:3246, ATM:5960, BCL2:5991, E2F1:6377, BAX:7101, CCNE1:10227	0.504518
PID_RAC1_REG_PATHWAY	-0.0655842	0.162368	0.304	0.415843	38	ARHGEF25:13, VAV2:222, TIAM2:312, DOCK1:433, MCF2:1189, SOS1:1341, ARHGAP9:1604, VAV1:2038, ABR:2347, ARHGEF6:2998	0.504518
REACTOME_FGFR_LIGAND_BINDING_AND_ACTIVATION	-0.0758022	0.218732	0.304	0.491282	22	KLB:116, FGFR2:391, FGF19:1808, FGF4:2513, FGF23:3521, KL:3712, FGF2:4349, FGFR3:4657, FGFR1:5670, FGF3:5810	0.504518
REACTOME_M_G1_TRANSITION	-0.0556581	0.101034	0.305	0.317154	73	RPA4:193, RPA1:379, ORC2:387, E2F3:419, E2F2:721, GMNN:904, ORC3:974, PSMD4:1271, RPA2:1856, ORC6:2164	0.504518
PID_P38_MK2_PATHWAY	-0.0689178	0.286289	0.305	0.563755	20	CDC25B:250, MAPKAPK2:799, TSC2:1156, RAF1:2773, MAPKAPK3:2914, YWHAZ:3080, LSP1:3186, TCF3:4766, HSPB1:5645, MAPK14:6244	0.504518
PID_ATF2_PATHWAY	-0.0545303	0.155292	0.306	0.406416	57	CDK4:198, CCND1:1723, SELE:2587, ACHE:2743, CSRP2:3158, RB1:3246, HRK:3677, KAT5:4195, IL23A:4241, POU2F1:4572	0.504518
PID_CDC42_PATHWAY	-0.0395103	0.264575	0.306	0.544487	67	VAV2:222, PRKCZ:246, EXOC7:569, WASL:794, APC:1066, PRKCE:2178, MAP3K1:2324, RAF1:2773, ARHGEF6:2998, ARHGDIA:3466	0.504518
REACTOME_PEPTIDE_CHAIN_ELONGATION	-0.0625868	0.122738	0.307	0.359768	51	RPS3:412, RPL28:745, RPL35:806, RPSA:872, RPLP0:2298, RPL5:2654, RPS24:3358, RPS3A:3384, RPS6:3438, RPL26:3573	0.504518
REACTOME_GROWTH_HORMONE_RECEPTOR_SIGNALING	-0.0830472	0.159367	0.308	0.41229	24	GHR:436, GH1:1436, IRS1:2430, PRL:2468, GH2:2599, CSH1:2977, LYN:4321, ADAM17:4727, PRLR:5878, JAK2:7161	0.504518
REACTOME_GLOBAL_GENOMIC_NER_GG_NER	-0.0646135	0.206372	0.309	0.476841	32	RPA1:379, ERCC4:442, RFC5:940, RPA2:1856, DDB2:2163, POLD4:2711, RAD23B:3162, RPA3:4060, POLE:4358, ERCC1:6554	0.504518
REACTOME_INCRETIN_SYNTHESIS_SECRETION_AND_INACTIVATION	-0.0724844	0.262083	0.309	0.541102	20	GCG:860, GNG13:1103, GNB3:1963, GRP:2623, LEP:4720, CDX2:5177, ISL1:5559, GIP:5652, GATA4:5689, GPR119:6837	0.504518
KEGG_ADIPOCYTOKINE_SIGNALING_PATHWAY	-0.0393429	0.266604	0.31	0.546903	67	PTPN11:39, IKBKG:160, AKT3:541, RELA:803, TRAF2:896, NFKBIA:1497, POMC:2246, TRADD:2422, IRS1:2430, IRS4:2502	0.504775
PID_ALK2_PATHWAY	-0.0858672	0.324224	0.311	0.600617	11	AMHR2:85, FKBP1A:1533, TLX2:2066, SMAD1:6039, SMAD9:6518, BMPR2:7340, SMAD5:8160, AMH:8568, SMAD4:16439, ACVR1:17081	0.505031
KEGG_NUCLEOTIDE_EXCISION_REPAIR	-0.0554551	0.214352	0.314	0.483996	42	RPA4:193, RPA1:379, ERCC4:442, RFC5:940, RPA2:1856, DDB2:2163, POLD4:2711, RAD23B:3162, CUL4B:3537, RPA3:4060	0.508525
REACTOME_JNK_C_JUN_KINASES_PHOSPHORYLATION_AND_ACTIVATION_MEDIATED_BY_ACTIVATED_HUMAN_TAK1	-0.0647204	0.370328	0.316	0.636238	16	IKBKG:160, TRAF6:1024, IRAK1:1183, IRAK2:1373, MAP2K7:5780, RIPK2:7779, MAPK8:7853, NOD2:8755, NOD1:10285, MAP2K4:11109	0.510384
REACTOME_GRB2_EVENTS_IN_ERBB2_SIGNALING	-0.067254	0.27518	0.317	0.552956	22	NRG4:49, EGF:919, SOS1:1341, RAF1:2773, BTC:3525, NRG1:4214, EREG:5478, NRG2:5496, HRAS:5714, CDK1:7046	0.510623
KEGG_GLIOMA	-0.0532614	0.147849	0.318	0.39562	62	IGF1R:94, CDK4:198, E2F3:419, AKT3:541, PDGFA:706, E2F2:721, EGF:919, IGF1:1014, SHC1:1107, CDKN1A:1333	0.510861
REACTOME_TRIF_MEDIATED_TLR3_SIGNALING	-0.0434157	0.213525	0.319	0.483996	69	MEF2A:69, IKBKG:160, S100B:369, RPS6KA5:559, MAPKAPK2:799, RELA:803, RIPK1:941, TRAF6:1024, RPS6KA2:1092, ELK1:1165	0.511097
BIOCARTA_IGF1_PATHWAY	-0.0884029	0.161076	0.321	0.414151	21	PTPN11:39, IGF1R:94, IGF1:1014, SHC1:1107, ELK1:1165, SOS1:1341, IRS1:2430, RAF1:2773, HRAS:5714, FOS:7524	0.51293
REACTOME_FORMATION_OF_INCISION_COMPLEX_IN_GG_NER	-0.0800588	0.215467	0.322	0.485655	20	RPA1:379, ERCC4:442, RPA2:1856, DDB2:2163, RAD23B:3162, RPA3:4060, ERCC1:6554, GTF2H3:6930, MNAT1:7230, ERCC3:7411	0.513159
REACTOME_INTERACTIONS_OF_VPR_WITH_HOST_CELLULAR_PROTEINS	-0.0893849	0.0804567	0.325	0.283092	32	NUP214:90, KPNA1:507, NUP205:894, NUP50:1780, NUP188:1801, NUP93:3529, TPR:3645, HMGA1:4168, NUP133:4445, NUP210:5303	0.515642
REACTOME_TRANSCRIPTION	-0.0504277	0.0312405	0.326	0.155329	155	TAF1C:103, CPSF2:192, POLR2G:384, HIST1H2BB:629, RRN3:740, TAF1B:844, GTF3C4:1010, CPSF1:1204, CSTF2:1300, BRF1:1308	0.515642
KEGG_BASE_EXCISION_REPAIR	-0.06074	0.227742	0.327	0.501818	33	OGG1:50, APEX2:570, MBD4:744, NTHL1:1025, NEIL2:1860, POLD4:2711, PARP4:4164, POLE:4358, NEIL3:4637, NEIL1:4700	0.515642
REACTOME_G_ALPHA_Z_SIGNALLING_EVENTS	-0.0499622	0.280944	0.327	0.559262	39	ADCY7:169, GNG7:869, GNG13:1103, GNB3:1963, GNAS:2077, PRKCE:2178, GNGT1:2936, RGS4:3106, PRKCD:3553, GNG4:4297	0.515642
KEGG_PRION_DISEASES	-0.0542086	0.274562	0.329	0.552956	34	C5:594, C9:854, ELK1:1165, C7:1891, IL1A:2013, C8B:2740, NOTCH1:3252, STIP1:4715, IL6:5246, C6:5335	0.51608
REACTOME_POL_SWITCHING	-0.0839974	0.294533	0.329	0.574174	13	RFC5:940, PRIM1:2701, POLD4:2711, POLA2:6130, POLA1:7544, POLD3:8418, POLD1:9125, RFC2:9872, POLD2:10519, PCNA:10915	0.51608
BIOCARTA_ETS_PATHWAY	-0.0754946	0.267754	0.331	0.547503	18	ETS1:2317, E2F4:4063, SIN3B:4325, DDX20:5421, HRAS:5714, E2F1:6377, ETV3:6442, ETS2:7463, FOS:7524, RBL2:7714	0.517861
PID_IFNG_PATHWAY	-0.0478769	0.30151	0.333	0.578574	39	PTPN11:39, IRF1:179, RAPGEF1:848, MAP3K1:2324, PRKCD:3553, CBL:3597, AKT1:3757, CASP1:4077, IFNG:4722, SMAD7:5532	0.519634
KEGG_PANCREATIC_CANCER	-0.0504941	0.147971	0.335	0.39562	69	IKBKG:160, CDK4:198, E2F3:419, AKT3:541, E2F2:721, RELA:803, EGF:919, RALB:1135, CDKN2A:1545, CCND1:1723	0.520046
REACTOME_RESOLUTION_OF_AP_SITES_VIA_THE_MULTIPLE_NUCLEOTIDE_PATCH_REPLACEMENT_PATHWAY	-0.0772374	0.270481	0.335	0.551315	17	OGG1:50, MBD4:744, NTHL1:1025, POLD4:2711, CCNO:3622, MUTYH:7708, POLD3:8418, POLD1:9125, TDG:9145, MPG:10308	0.520046
REACTOME_PTM_GAMMA_CARBOXYLATION_HYPUSINE_FORMATION_AND_ARYLSULFATASE_ACTIVATION	-0.0712244	0.209118	0.337	0.480347	26	SUMF1:932, ARSK:963, STS:1274, ARSG:1965, ARSJ:3506, PROS1:3533, ARSA:5275, ARSE:6156, SUMF2:6882, VKORC1:7254	0.521799
REACTOME_CONVERSION_FROM_APC_C_CDC20_TO_APC_C_CDH1_IN_LATE_ANAPHASE	-0.0966193	0.195315	0.34	0.464597	15	ANAPC5:973, ANAPC7:1530, CDC26:3095, ANAPC2:4054, CDC27:4923, CDC23:7191, ANAPC1:7441, CDC20:9014, CDC14A:9620, ANAPC10:10627	0.525087
BIOCARTA_LAIR_PATHWAY	-0.116141	0.0975202	0.341	0.309258	17	C5:594, C7:1891, IL1A:2013, C3:2266, SELP:3213, TNF:3304, IL6:5246, C6:5335, KNG1:9048, ITGAL:9226	0.525278
REACTOME_SHC1_EVENTS_IN_ERBB4_SIGNALING	-0.0697818	0.28029	0.343	0.559262	20	NRG4:49, SHC1:1107, SOS1:1341, RAF1:2773, BTC:3525, NRG1:4214, EREG:5478, NRG2:5496, HRAS:5714, CDK1:7046	0.527004
REACTOME_HORMONE_LIGAND_BINDING_RECEPTORS	-0.144963	0.112531	0.344	0.337593	10	GNRH1:792, LHB:863, LHCGR:1740, FSHB:2612, FSHR:2866, CGA:8742, TSHR:10799, TSHB:13211, GNRHR:14763, GNRH2:16151	0.527188
REACTOME_INHIBITION_OF_REPLICATION_INITIATION_OF_DAMAGED_DNA_BY_RB1_E2F1	-0.106124	0.223082	0.347	0.494212	11	PRIM1:2701, RB1:3246, PPP2R3B:4565, POLA2:6130, E2F1:6377, POLA1:7544, TFDP1:7973, PPP2R1A:10571, PRIM2:11305, PPP2R1B:13094	0.530429
REACTOME_KINESINS	-0.078907	0.190542	0.35	0.459459	23	KIF2C:601, KLC1:1408, KIF9:1906, KIF26A:2706, KIF2B:3477, KIF15:3720, KIF11:4368, KIF22:4486, KIF3B:4660, KLC4:4704	0.532299
BIOCARTA_LONGEVITY_PATHWAY	-0.0642169	0.389394	0.35	0.653796	15	IGF1R:94, GHR:436, IGF1:1014, SHC1:1107, GH1:1436, AKT1:3757, HRAS:5714, PIK3R1:9659, PIK3CA:11302, SOD3:13913	0.532299
REACTOME_NUCLEOTIDE_BINDING_DOMAIN_LEUCINE_RICH_REPEAT_CONTAINING_RECEPTOR_NLR_SIGNALING_PATHWAYS	-0.0547941	0.209259	0.354	0.480347	44	IKBKG:160, TRAF6:1024, CASP8:1146, IRAK1:1183, IRAK2:1373, BIRC2:1941, MEFV:1953, CARD9:2040, CYLD:2232, TXN:3953	0.534478
REACTOME_HIV_LIFE_CYCLE	-0.0512776	0.0789913	0.355	0.281963	99	NUP214:90, POLR2G:384, XPO1:403, NUP205:894, NUP50:1780, RNMT:1787, NUP188:1801, GTF2A2:2514, SUPT5H:2764, TAF10:2786	0.534478
REACTOME_RESOLUTION_OF_AP_SITES_VIA_THE_SINGLE_NUCLEOTIDE_REPLACEMENT_PATHWAY	-0.086323	0.300644	0.355	0.578553	12	OGG1:50, MBD4:744, NTHL1:1025, CCNO:3622, MUTYH:7708, TDG:9145, MPG:10308, LIG3:11160, XRCC1:11502, POLB:12684	0.534478
BIOCARTA_GCR_PATHWAY	-0.0653788	0.365479	0.355	0.632903	16	RELA:803, NPPA:1673, GNAS:2077, GNGT1:2936, AKT1:3757, HSP90AA1:4929, NFKB1:8261, CORIN:9342, PIK3R1:9659, GNB1:10176	0.534478
BIOCARTA_GSK3_PATHWAY	-0.0621055	0.273433	0.357	0.552956	26	RELA:803, APC:1066, IRAK1:1183, CCND1:1723, TLR4:3084, GSK3B:3505, AKT1:3757, TIRAP:4172, PDPK1:5608, MYD88:7883	0.536142
PID_HDAC_CLASSIII_PATHWAY	-0.070444	0.223154	0.358	0.494212	25	CDKN1A:1333, HOXA10:1403, TUBA1B:2682, TP53:3130, KAT2B:3432, FOXO4:3833, SIRT3:5111, MYOD1:6353, FHL2:7088, BAX:7101	0.536299
PID_CD8_TCR_PATHWAY	-0.0499451	0.213654	0.36	0.483996	52	IKBKG:160, CD28:342, TRAF6:1024, SHC1:1107, SOS1:1341, CD80:2028, VAV1:2038, MALT1:2143, PRKCE:2178, CD86:2837	0.53795
REACTOME_PRESYNAPTIC_NICOTINIC_ACETYLCHOLINE_RECEPTORS	-0.12475	0.134703	0.361	0.377944	12	CHRNB4:282, CHRNA5:1484, CHRNG:1538, CHRNA2:3985, CHRNB2:5686, CHRNB3:6385, CHRNA4:7728, CHRND:8843, CHRNA3:10216, CHRNA6:14142	0.538103
PID_TAP63_PATHWAY	-0.0379647	0.335463	0.363	0.610803	54	OGG1:50, ABL1:583, DICER1:680, CDKN1A:1333, TP63:1527, CDKN2A:1545, MFGE8:2003, TFAP2C:2676, PRKCD:3553, PML:3726	0.539741
REACTOME_SYNTHESIS_SECRETION_AND_DEACYLATION_OF_GHRELIN	-0.0828012	0.283612	0.366	0.560351	14	GCG:860, PLA2G7:922, GH1:1436, LEP:4720, BCHE:5494, SEC11A:7999, SPCS1:8833, PCSK1:10517, GHRL:10727, SEC11C:11247	0.541939
REACTOME_REGULATION_OF_WATER_BALANCE_BY_RENAL_AQUAPORINS	-0.0510981	0.296073	0.367	0.574174	35	ADCY7:169, GNG7:869, GNG13:1103, AQP2:1259, GNB3:1963, GNAS:2077, RAB11FIP2:2279, GNGT1:2936, GNG4:4297, AVP:4350	0.541939
REACTOME_DOUBLE_STRAND_BREAK_REPAIR	-0.0991118	0.107811	0.368	0.329624	22	RPA1:379, NBN:549, TDP1:1051, RPA2:1856, BRIP1:2101, BRCA2:2576, RPA3:4060, RAD50:4515, XRCC4:4630, ATM:5960	0.541939
REACTOME_MITOCHONDRIAL_TRNA_AMINOACYLATION	-0.0884904	0.160661	0.369	0.413962	21	NARS2:2007, YARS2:2901, RARS2:3378, HARS2:4659, LARS2:5023, DARS2:6057, TARS2:6850, VARS2:7594, MARS2:8197, PARS2:8576	0.541939
BIOCARTA_ARAP_PATHWAY	-0.0822155	0.255109	0.369	0.532034	16	ARFGAP3:826, CYTH3:1239, ASAP2:1710, COPA:1853, CYTH1:6475, CYTH4:8063, GPLD1:9041, ARFGEF2:9541, KDELR3:9698, KDELR2:9800	0.541939
REACTOME_ABORTIVE_ELONGATION_OF_HIV1_TRANSCRIPT_IN_THE_ABSENCE_OF_TAT	-0.0998323	0.212824	0.372	0.483996	13	POLR2G:384, SUPT5H:2764, POLR2E:3039, NCBP1:5597, POLR2F:6000, POLR2D:6871, GTF2F2:7285, CTDP1:7436, POLR2C:8716, NCBP2:13103	0.54368
REACTOME_INHIBITION_OF_INSULIN_SECRETION_BY_ADRENALINE_NORADRENALINE	-0.0692916	0.283683	0.372	0.560351	20	GNAO1:426, GNG7:869, GNG13:1103, GNB3:1963, GNGT1:2936, GNG4:4297, ADRA2A:4410, GNGT2:5800, ADCY6:7633, GNB5:9719	0.54368
KEGG_HEMATOPOIETIC_CELL_LINEAGE	-0.0572668	0.0688633	0.375	0.263495	85	GP5:528, IL5RA:591, CD55:630, CSF3R:838, IL7R:1104, IL7:1503, IL6R:1539, IL1A:2013, KITLG:2069, IL5:3174	0.545404
KEGG_REGULATION_OF_ACTIN_CYTOSKELETON	-0.0250926	0.223589	0.375	0.494212	201	VAV2:222, TIAM2:312, FGFR2:391, FN1:392, DOCK1:433, PDGFA:706, WASL:794, ITGB7:808, PDGFD:886, EGF:919	0.545404
REACTOME_COSTIMULATION_BY_THE_CD28_FAMILY	-0.0378782	0.31126	0.379	0.588446	60	CD28:342, PPP2R5C:537, AKT3:541, HLA-DPA1:1245, CD80:2028, VAV1:2038, CTLA4:2827, CD86:2837, CD274:3099, CSK:3395	0.549887
REACTOME_RNA_POL_I_RNA_POL_III_AND_MITOCHONDRIAL_TRANSCRIPTION	-0.04327	0.157343	0.381	0.409294	90	TAF1C:103, HIST1H2BB:629, RRN3:740, TAF1B:844, GTF3C4:1010, BRF1:1308, POLR1A:1865, POLR3E:2290, TFB2M:2457, GTF3C5:2646	0.550243
REACTOME_SIGNALING_BY_TGF_BETA_RECEPTOR_COMPLEX	-0.0529823	0.178894	0.382	0.443075	54	WWTR1:4, PRKCZ:246, PMEPA1:349, XPO1:403, PPP1R15A:865, CDKN2B:1414, FKBP1A:1533, E2F5:1683, UCHL5:1893, F11R:2170	0.550243
REACTOME_PI3K_EVENTS_IN_ERBB4_SIGNALING	-0.0588986	0.22193	0.382	0.494212	36	NRG4:49, AKT3:541, RPS6KB2:691, TSC2:1156, CDKN1A:1333, BTC:3525, AKT1S1:3560, AKT1:3757, FOXO4:3833, NRG1:4214	0.550243
SA_TRKA_RECEPTOR	-0.0689927	0.339579	0.384	0.613361	16	AKT3:541, SHC1:1107, ELK1:1165, CDKN1A:1333, SOS1:1341, AKT1:3757, HRAS:5714, NGF:7640, NTRK1:8858, PIK3CA:11302	0.551797
PID_PRL_SIGNALING_EVENTS_PATHWAY	-0.051991	0.398912	0.386	0.661285	22	CDKN1A:1333, PTP4A3:2636, PTP4A2:2657, TUBA1B:2682, CCNA2:5874, RAC1:6451, BCAR1:6967, RABGGTA:7042, RHOC:7145, ITGA1:9749	0.553344
KEGG_NATURAL_KILLER_CELL_MEDIATED_CYTOTOXICITY	-0.0419331	0.109874	0.387	0.33196	123	NFATC2:38, PTPN11:39, VAV2:222, SH2D1A:415, TNFSF10:423, FASLG:557, TNFRSF10B:695, IFNA1:875, NFATC1:911, KLRK1:962	0.553453
REACTOME_PD1_SIGNALING	-0.0889393	0.191683	0.388	0.461339	18	HLA-DPA1:1245, CD274:3099, CSK:3395, CD4:3879, PDCD1LG2:4737, CD3D:6653, CD3G:7032, HLA-DQA1:7036, PDCD1:8413, CD3E:8590	0.553562
REACTOME_MYD88_MAL_CASCADE_INITIATED_ON_PLASMA_MEMBRANE	-0.0375456	0.256026	0.389	0.532034	77	MEF2A:69, IKBKG:160, S100B:369, RPS6KA5:559, MAPKAPK2:799, RELA:803, TRAF6:1024, RPS6KA2:1092, ELK1:1165, IRAK1:1183	0.553671
REACTOME_KERATAN_SULFATE_BIOSYNTHESIS	-0.0637519	0.260918	0.394	0.539569	26	OMD:4010, B4GALT5:4221, B3GNT4:4452, B4GALT6:4553, ST3GAL1:4862, B3GNT2:5147, CHST5:5229, OGN:5325, KERA:6984, B4GALT1:7442	0.556514
REACTOME_SIGNALLING_BY_NGF	-0.0362884	0.0791255	0.396	0.281963	200	AKAP13:20, MEF2A:69, ADCY7:169, PLEKHG2:245, TIAM2:312, CAMK4:489, PCSK5:510, AKT3:541, RPS6KA5:559, RPS6KB2:691	0.556514
KEGG_DNA_REPLICATION	-0.0617674	0.200227	0.396	0.468808	36	RPA4:193, RPA1:379, RFC5:940, RPA2:1856, RNASEH1:2286, PRIM1:2701, POLD4:2711, RPA3:4060, POLE:4358, DNA2:5582	0.556514
BIOCARTA_VIP_PATHWAY	-0.0591405	0.337273	0.399	0.613136	22	NFATC2:38, RELA:803, NFATC1:911, PPP3CC:1012, NFKBIA:1497, VIPR2:1666, MAP3K1:2324, GNAQ:3886, CHUK:4461, EGR2:5463	0.556514
PID_IL1_PATHWAY	-0.0534348	0.30367	0.4	0.580973	31	IKBKG:160, PRKCZ:246, RELA:803, TRAF6:1024, IRAK1:1183, IL1A:2013, IRAK4:3454, CASP1:4077, CHUK:4461, MAPK8:7853	0.556514
REACTOME_TGF_BETA_RECEPTOR_SIGNALING_IN_EMT_EPITHELIAL_TO_MESENCHYMAL_TRANSITION	-0.0677478	0.436692	0.401	0.690709	11	PRKCZ:246, FKBP1A:1533, F11R:2170, TGFBR2:5168, CGN:7865, ARHGEF18:10189, PARD6A:10217, TGFB1:11798, TGFBR1:15385, SMURF1:15940	0.556514
REACTOME_INHIBITION_OF_THE_PROTEOLYTIC_ACTIVITY_OF_APC_C_REQUIRED_FOR_THE_ONSET_OF_ANAPHASE_BY_MITOTIC_SPINDLE_CHECKPOINT_COMPONENTS	-0.0834931	0.233572	0.402	0.505085	17	ANAPC5:973, ANAPC7:1530, CDC26:3095, ANAPC2:4054, CDC27:4923, BUB1B:7158, CDC23:7191, ANAPC1:7441, CDC20:9014, BUB3:9826	0.556514
BIOCARTA_BIOPEPTIDES_PATHWAY	-0.04662	0.314379	0.402	0.590953	39	STAT2:452, MAPT:505, STAT6:592, SHC1:1107, SOS1:1341, RAF1:2773, GNGT1:2936, MYLK:3166, GNA11:3352, CDK5:4151	0.556514
REACTOME_BASE_EXCISION_REPAIR	-0.0633191	0.339614	0.402	0.613361	19	OGG1:50, MBD4:744, NTHL1:1025, POLD4:2711, CCNO:3622, MUTYH:7708, POLD3:8418, POLD1:9125, TDG:9145, MPG:10308	0.556514
PID_INSULIN_GLUCOSE_PATHWAY	-0.0515277	0.382599	0.402	0.648491	24	PRKCZ:246, INSR:413, LNPEP:2426, YWHAZ:3080, PPP1R3A:3483, GSK3B:3505, PPP1CC:3639, AKT1:3757, GYS1:4428, ASIP:5059	0.556514
REACTOME_LATE_PHASE_OF_HIV_LIFE_CYCLE	-0.051868	0.0974465	0.403	0.309258	86	NUP214:90, POLR2G:384, XPO1:403, NUP205:894, NUP50:1780, RNMT:1787, NUP188:1801, GTF2A2:2514, SUPT5H:2764, TAF10:2786	0.556514
REACTOME_CGMP_EFFECTS	-0.0679438	0.305517	0.403	0.582763	19	KCNMB2:1453, PDE6G:2090, PDE10A:2353, PDE5A:2471, KCNMB1:3326, PDE3A:4061, KCNMB3:5647, PRKG1:5906, PDE1A:8128, PDE3B:10764	0.556514
REACTOME_CELL_SURFACE_INTERACTIONS_AT_THE_VASCULAR_WALL	-0.0466332	0.143155	0.404	0.388694	83	ANGPT2:154, SLC16A1:157, FN1:392, SLC7A6:1032, SHC1:1107, SOS1:1341, DOK2:1463, ANGPT4:1518, F11R:2170, APOB:2275	0.556514
BIOCARTA_GRANULOCYTES_PATHWAY	-0.0876618	0.273973	0.404	0.552956	13	C5:594, IL1A:2013, SELP:3213, TNF:3304, IFNG:4722, CSF3:6129, SELL:6911, ITGAL:9226, IL8:9652, SELPLG:12370	0.556514
BIOCARTA_ACE2_PATHWAY	-0.0854481	0.286273	0.406	0.563755	13	COL4A6:343, ACE:2797, COL4A4:4304, ACE2:4459, COL4A3:6211, COL4A1:7671, COL4A5:9238, AGT:10028, CMA1:11664, AGTR1:11898	0.557987
BIOCARTA_EPO_PATHWAY	-0.0646672	0.329432	0.408	0.604905	19	SHC1:1107, ELK1:1165, SOS1:1341, RAF1:2773, EPO:3495, HRAS:5714, JAK2:7161, FOS:7524, MAPK8:7853, STAT5B:9321	0.559452
KEGG_HEDGEHOG_SIGNALING_PATHWAY	-0.0433823	0.271064	0.409	0.551624	54	WNT8A:236, BMP8B:1516, PTCH1:1621, WNT7A:1923, HHIP:1975, BMP8A:2672, GSK3B:3505, WNT7B:3643, WNT2:4103, WNT9B:4135	0.559543
KEGG_BASAL_CELL_CARCINOMA	-0.0455508	0.24353	0.411	0.518719	55	WNT8A:236, APC:1066, DVL2:1344, PTCH1:1621, WNT7A:1923, HHIP:1975, FZD10:2421, AXIN2:2540, TP53:3130, GSK3B:3505	0.560428
REACTOME_APC_CDC20_MEDIATED_DEGRADATION_OF_NEK2A	-0.0777887	0.253484	0.413	0.531071	18	ANAPC5:973, ANAPC7:1530, CDC26:3095, ANAPC2:4054, CDC27:4923, BUB1B:7158, CDC23:7191, ANAPC1:7441, CDC20:9014, BUB3:9826	0.560428
REACTOME_TRAFFICKING_AND_PROCESSING_OF_ENDOSOMAL_TLR	-0.0775887	0.352203	0.413	0.623429	12	CTSK:841, TLR9:1289, CTSS:2234, TLR3:3816, CTSB:3972, TLR8:4640, TLR7:4933, UNC93B1:13072, LGMN:14664, CTSL1:16425	0.560428
REACTOME_TRANSPORT_OF_MATURE_TRANSCRIPT_TO_CYTOPLASM	-0.0575344	0.16861	0.416	0.425016	48	NUP214:90, CPSF2:192, NUP205:894, CPSF1:1204, SLBP:1359, SRRM1:1730, NUP50:1780, NUP188:1801, UPF3B:2520, NUP93:3529	0.560428
REACTOME_TRAF6_MEDIATED_INDUCTION_OF_NFKB_AND_MAP_KINASES_UPON_TLR7_8_OR_9_ACTIVATION	-0.0376015	0.27452	0.416	0.552956	71	MEF2A:69, IKBKG:160, S100B:369, RPS6KA5:559, MAPKAPK2:799, RELA:803, TRAF6:1024, RPS6KA2:1092, ELK1:1165, IRAK1:1183	0.560428
REACTOME_ARMS_MEDIATED_ACTIVATION	-0.0541774	0.453301	0.417	0.703056	16	RAPGEF1:848, CRK:1250, RAF1:2773, HRAS:5714, KIDINS220:5990, CDK1:7046, NGF:7640, NRAS:7867, NTRK1:8858, BRAF:9294	0.560428
KEGG_THYROID_CANCER	-0.0446795	0.405434	0.418	0.667438	29	CCND1:1723, CCDC6:1747, TP53:3130, TPR:3645, TCF7L1:3773, CDH1:4281, RXRG:4733, RXRA:4832, HRAS:5714, RET:5839	0.560428
KEGG_ANTIGEN_PROCESSING_AND_PRESENTATION	-0.0442494	0.183519	0.419	0.450168	76	RFX5:345, IFNA1:875, IFNA21:1232, HLA-DPA1:1245, IFNA8:1246, IFI30:1577, IFNA4:1812, LTA:2139, CTSS:2234, KIR3DL2:2273	0.560428
REACTOME_TELOMERE_MAINTENANCE	-0.046894	0.2138	0.419	0.483996	59	ACD:142, DKC1:287, RPA1:379, HIST1H2BB:629, RFC5:940, TERF1:1854, RPA2:1856, TINF2:2365, PRIM1:2701, POLD4:2711	0.560428
KEGG_MISMATCH_REPAIR	-0.0741945	0.218397	0.419	0.491282	23	RPA4:193, RPA1:379, RFC5:940, RPA2:1856, POLD4:2711, EXO1:3049, RPA3:4060, PMS2:6688, RFC1:8280, POLD3:8418	0.560428
REACTOME_ZINC_TRANSPORTERS	-0.0564429	0.449337	0.421	0.701164	15	SLC30A3:2618, SLC39A1:3357, SLC30A1:3923, SLC39A4:4950, SLC39A3:6355, SLC39A5:6654, SLC30A5:7258, SLC39A7:8615, SLC30A2:11055, SLC39A8:11098	0.561849
PID_INTEGRIN_A9B1_PATHWAY	-0.0562472	0.330712	0.423	0.605694	25	ADAM12:185, FN1:392, ADAM8:2218, PXN:3020, SPP1:4764, ADAM15:5070, FIGF:5364, RAC1:6451, CSF2RA:6519, VEGFA:6541	0.562097
PID_AURORA_B_PATHWAY	-0.0653094	0.164135	0.424	0.41776	38	AURKC:235, CDCA8:405, KIF2C:601, SGOL1:1482, BIRC5:1507, AURKA:2586, BUB1:3046, MYLK:3166, PPP1CC:3639, INCENP:4017	0.562097
BIOCARTA_NKCELLS_PATHWAY	-0.0563919	0.395071	0.424	0.657423	19	IL18:130, VAV1:2038, HLA-A:3165, LAT:3980, KLRC4:5220, RAC1:6451, B2M:6592, PTPN6:9368, PIK3R1:9659, KLRD1:10668	0.562097
KEGG_GLYCOSAMINOGLYCAN_DEGRADATION	-0.0561354	0.373508	0.425	0.640728	21	HYAL3:1277, SGSH:2500, SPAM1:3434, GUSB:3501, NAGLU:4366, GALNS:4538, GLB1:4602, IDUA:6403, HYAL1:6504, HPSE:6708	0.562179
REACTOME_SYNTHESIS_OF_PIPS_AT_THE_EARLY_ENDOSOME_MEMBRANE	-0.0680176	0.41475	0.426	0.673508	12	VAC14:563, PIK3R4:3751, PI4K2B:4124, MTM1:5237, INPP4B:7104, PIK3C3:7118, PIK3C2A:7615, PI4K2A:10182, MTMR2:12028, FIG4:14862	0.562261
KEGG_COMPLEMENT_AND_COAGULATION_CASCADES	-0.0752609	0.0322906	0.428	0.157509	68	C3AR1:8, F8:114, C5:594, CD55:630, TFPI:670, C9:854, CFH:1689, C7:1891, F5:1910, C3:2266	0.563659
PID_P38_ALPHA_BETA_DOWNSTREAM_PATHWAY	-0.0465689	0.340957	0.429	0.613361	35	MEF2A:69, RPS6KA5:559, MITF:731, MAPKAPK2:799, PLA2G4A:1739, MAPKAPK3:2914, TP53:3130, RAB5A:3449, ATF6:3835, SLC9A1:3945	0.563737
REACTOME_CTLA4_INHIBITORY_SIGNALING	-0.0479103	0.45853	0.431	0.705176	20	PPP2R5C:537, AKT3:541, CD80:2028, CTLA4:2827, CD86:2837, AKT1:3757, LYN:4321, PDPK1:5608, YES1:5696, PPP2R5A:6333	0.565126
PID_NFAT_3PATHWAY	-0.040246	0.325733	0.432	0.600617	50	NFATC2:38, NUP214:90, PRKCZ:246, XPO1:403, CAMK4:489, NFATC1:911, FKBP1A:1533, PRKCE:2178, MAP3K1:2324, YWHAZ:3080	0.5652
PID_ERBB4_PATHWAY	-0.0473885	0.312723	0.434	0.589468	38	NRG4:49, YAP1:270, WWOX:643, LRIG1:956, SHC1:1107, CBFA2T3:1596, PRL:2468, BTC:3525, NRG1:4214, ADAM17:4727	0.56658
PID_EPHA2_FWD_PATHWAY	-0.0555828	0.41453	0.435	0.673508	18	VAV2:222, SHC1:1107, EFNA1:1774, PTK2:2115, CBL:3597, ACP1:4365, EPHA2:5112, RAC1:6451, BCAR1:6967, PIK3R1:9659	0.566651
REACTOME_RNA_POL_II_TRANSCRIPTION_PRE_INITIATION_AND_PROMOTER_OPENING	-0.0591919	0.232847	0.439	0.504969	34	POLR2G:384, GTF2A2:2514, TAF10:2786, POLR2E:3039, TAF6:3127, TAF11:4650, GTF2E1:4914, TAF13:5460, TAF1:5870, TAF4B:5961	0.570621
REACTOME_PROCESSING_OF_INTRONLESS_PRE_MRNAS	-0.10369	0.213762	0.441	0.483996	12	CPSF2:192, CPSF1:1204, CSTF2:1300, NCBP1:5597, CPSF7:6087, PAPOLA:7069, PCF11:7431, CPSF3:11143, CSTF1:11669, NCBP2:13103	0.57198
REACTOME_RNA_POL_III_TRANSCRIPTION_INITIATION_FROM_TYPE_3_PROMOTER	-0.0666667	0.258628	0.445	0.536568	24	POLR3E:2290, POLR3H:2864, POLR2E:3039, SNAPC2:3312, SNAPC4:3405, POU2F1:4572, SNAPC3:5001, POLR2F:6000, POLR3C:6233, POLR3B:6391	0.572329
KEGG_LYSINE_DEGRADATION	-0.0425385	0.335203	0.445	0.610803	43	TMLHE:32, NSD1:874, SETDB2:901, ACAT2:976, AASDH:1263, SUV420H2:2248, SETD1B:2418, SETD2:2956, EHMT1:4305, WHSC1:4494	0.572329
KEGG_EPITHELIAL_CELL_SIGNALING_IN_HELICOBACTER_PYLORI_INFECTION	-0.0424689	0.230456	0.446	0.503033	67	PTPN11:39, IKBKG:160, RELA:803, ATP6V0E2:1178, ATP6V1F:1365, NFKBIA:1497, ATP6V1C1:1929, F11R:2170, PTPRZ1:2665, CSK:3395	0.572329
REACTOME_AQUAPORIN_MEDIATED_TRANSPORT	-0.0413075	0.355013	0.446	0.62408	42	ADCY7:169, GNG7:869, GNG13:1103, AQP2:1259, GNB3:1963, AQP7:1967, GNAS:2077, RAB11FIP2:2279, GNGT1:2936, GNG4:4297	0.572329
BIOCARTA_VITCB_PATHWAY	-0.085589	0.325794	0.447	0.600617	11	COL4A6:343, SLC23A2:2431, COL4A4:4304, COL4A3:6211, P4HB:6813, COL4A1:7671, COL4A5:9238, SLC2A3:11560, COL4A2:14022, SLC23A1:15237	0.572329
BIOCARTA_CCR5_PATHWAY	-0.0709999	0.357876	0.447	0.624597	14	CCL2:1226, CCL4:3019, GNAQ:3886, MAPK14:6244, CXCR4:6487, FOS:7524, CCR5:7618, MAPK8:7853, CXCL12:10461, PTK2B:11282	0.572329
REACTOME_INSULIN_RECEPTOR_SIGNALLING_CASCADE	-0.029924	0.347461	0.452	0.61957	83	KLB:116, TSC1:263, RPTOR:295, FGFR2:391, INSR:413, GAB1:646, EEF2K:761, SHC1:1107, TSC2:1156, CRK:1250	0.575147
KEGG_TYPE_I_DIABETES_MELLITUS	-0.0587068	0.194001	0.453	0.462563	41	CD28:342, FASLG:557, IL12B:1150, HLA-DPA1:1245, IL1A:2013, CD80:2028, LTA:2139, CD86:2837, IL12A:2863, HLA-A:3165	0.575147
BIOCARTA_IGF1MTOR_PATHWAY	-0.0511352	0.4406	0.453	0.692543	19	IGF1R:94, IGF1:1014, RPS6:3438, GSK3B:3505, AKT1:3757, PDPK1:5608, EIF2S2:6645, EIF4E:7789, MTOR:7983, PIK3R1:9659	0.575147
REACTOME_KERATAN_SULFATE_KERATIN_METABOLISM	-0.0502557	0.341236	0.454	0.613361	30	OMD:4010, B4GALT5:4221, B3GNT4:4452, B4GALT6:4553, GLB1:4602, ST3GAL1:4862, B3GNT2:5147, CHST5:5229, OGN:5325, KERA:6984	0.575147
REACTOME_NFKB_AND_MAP_KINASES_ACTIVATION_MEDIATED_BY_TLR4_SIGNALING_REPERTOIRE	-0.0326916	0.359536	0.454	0.62528	66	MEF2A:69, IKBKG:160, S100B:369, RPS6KA5:559, MAPKAPK2:799, RELA:803, RIPK1:941, TRAF6:1024, RPS6KA2:1092, ELK1:1165	0.575147
KEGG_LEISHMANIA_INFECTION	-0.0296936	0.391522	0.455	0.65411	70	RELA:803, TRAF6:1024, IL12B:1150, ELK1:1165, IRAK1:1183, HLA-DPA1:1245, NFKBIA:1497, IL1A:2013, C3:2266, IL12A:2863	0.575198
PID_A6B1_A6B4_INTEGRIN_PATHWAY	-0.0447668	0.299569	0.457	0.57745	45	EGF:919, SHC1:1107, LAMA4:1476, CASP7:1615, IL1A:2013, LAMA5:2424, YWHAZ:3080, AKT1:3757, LAMC3:4134, CDH1:4281	0.57651
NABA_ECM_GLYCOPROTEINS	-0.0323196	0.123389	0.461	0.360851	194	IGSF10:16, ZP4:36, CRIM1:77, VWA3A:117, IGFBP6:190, ZP2:268, FN1:392, PAPLN:595, GAS6:804, NDNF:829	0.57795
BIOCARTA_MYOSIN_PATHWAY	-0.04328	0.404777	0.461	0.667438	31	ARHGEF5:1216, ARHGEF4:2839, GNGT1:2936, ARHGEF6:2998, ARHGEF12:3009, MYLK:3166, ARHGEF10:3353, GNAQ:3886, GNA13:4443, ARHGEF16:5863	0.57795
PID_HEDGEHOG_GLI_PATHWAY	-0.0450974	0.296015	0.462	0.574174	45	XPO1:403, GNAO1:426, PTCH1:1621, GSK3B:3505, PRKCD:3553, AKT1:3757, SMO:4306, SIN3B:4325, KIF3A:4905, CSNK1A1:5163	0.57795
BIOCARTA_RAS_PATHWAY	-0.0500881	0.427164	0.462	0.685823	21	RELA:803, ELK1:1165, RAF1:2773, AKT1:3757, FOXO4:3833, CHUK:4461, HRAS:5714, RAC1:6451, BCL2L1:6875, CASP9:7210	0.57795
REACTOME_GLUCAGON_SIGNALING_IN_METABOLIC_REGULATION	-0.0433431	0.436074	0.465	0.690709	27	ADCY7:169, GCG:860, GNG7:869, GCGR:903, GNG13:1103, GNB3:1963, GNAS:2077, GNG4:4297, ADCY9:5449, ADCY6:7633	0.580492
PID_ERBB1_INTERNALIZATION_PATHWAY	-0.0362957	0.45164	0.469	0.703041	36	EGF:919, LRIG1:956, SHC1:1107, SOS1:1341, PTK2:2115, RAF1:2773, RAB5A:3449, CBL:3597, ZFYVE28:5548, HRAS:5714	0.584268
KEGG_ASTHMA	-0.0592565	0.278248	0.47	0.558244	28	HLA-DPA1:1245, CD40:2024, IL9:2749, CD40LG:3155, IL5:3174, TNF:3304, RNASE3:3387, FCER1G:3861, HLA-DMB:5136, CCL11:6663	0.584299
REACTOME_REGULATION_OF_GLUCOKINASE_BY_GLUCOKINASE_REGULATORY_PROTEIN	-0.0709619	0.202265	0.476	0.470845	27	NUP214:90, NUP205:894, NUP50:1780, NUP188:1801, NUP93:3529, TPR:3645, NUP133:4445, NUP210:5303, NUP37:5388, NUP107:5916	0.587038
REACTOME_HIGHLY_CALCIUM_PERMEABLE_POSTSYNAPTIC_NICOTINIC_ACETYLCHOLINE_RECEPTORS	-0.0878842	0.291987	0.478	0.570581	12	CHRNB4:282, CHRNA5:1484, CHRNA2:3985, CHRNB2:5686, CHRNB3:6385, CHRNA4:7728, CHRNA7:10040, CHRNA3:10216, CHRNA9:11401, CHRNA6:14142	0.587038
KEGG_T_CELL_RECEPTOR_SIGNALING_PATHWAY	-0.029226	0.304976	0.478	0.5826	104	NFATC2:38, IKBKG:160, CDK4:198, VAV2:222, CD28:342, AKT3:541, RELA:803, NFATC1:911, PPP3CC:1012, SOS1:1341	0.587038
KEGG_PYRIMIDINE_METABOLISM	-0.0311261	0.314435	0.478	0.590953	88	NME7:338, POLR2G:384, ZNRD1:459, POLR1A:1865, POLR1E:1949, UPP1:2420, NME6:2595, PRIM1:2701, POLD4:2711, POLR3H:2864	0.587038
BIOCARTA_CELL2CELL_PATHWAY	-0.0630004	0.431749	0.478	0.688363	13	PTK2:2115, PXN:3020, CSK:3395, ACTN3:4872, CTNNA2:4965, BCAR1:6967, ACTN2:8355, VCL:8927, SRC:11165, CTNNA1:13161	0.587038
PID_S1P_S1P1_PATHWAY	-0.045698	0.479541	0.479	0.719365	20	GNAO1:426, ITGAV:2736, PDGFRB:4064, GNAZ:6037, S1PR1:6131, RAC1:6451, VEGFA:6541, PLCB2:7801, PTGS2:7814, KDR:7954	0.587038
REACTOME_3_UTR_MEDIATED_TRANSLATIONAL_REGULATION	-0.0425472	0.222827	0.48	0.494212	69	RPS3:412, RPL28:745, EIF3K:788, RPL35:806, RPSA:872, EIF3H:887, EIF3J:1559, RPLP0:2298, RPL5:2654, RPS24:3358	0.587038
PID_PDGFRB_PATHWAY	-0.0214478	0.417277	0.481	0.675219	121	PTPN11:39, VAV2:222, ABL1:583, GAB1:646, WASL:794, RAPGEF1:848, SHC1:1107, ELK1:1165, CRK:1250, SOS1:1341	0.587038
PID_CONE_PATHWAY	-0.0900111	0.13539	0.482	0.377944	23	GNB3:1963, GUCY2F:2942, CNGB3:3007, GNAT2:3629, GUCA1B:4189, RGS9BP:5100, SLC24A2:5474, GNGT2:5800, GUCY2D:6573, GRK7:7134	0.587038
REACTOME_RNA_POL_II_PRE_TRANSCRIPTION_EVENTS	-0.0518859	0.219221	0.482	0.491517	47	POLR2G:384, GTF2A2:2514, SUPT5H:2764, TAF10:2786, SUPT16H:2961, POLR2E:3039, TAF6:3127, CCNT2:3592, TAF11:4650, GTF2E1:4914	0.587038
REACTOME_POST_TRANSLATIONAL_PROTEIN_MODIFICATION	-0.0283243	0.200423	0.484	0.468808	174	EDEM1:147, C1GALT1C1:176, ST6GALNAC2:211, GALNTL5:257, PIGM:631, DPAGT1:662, PIGP:716, GCNT3:824, SUMF1:932, ARSK:963	0.588278
REACTOME_SYNTHESIS_OF_PIPS_AT_THE_PLASMA_MEMBRANE	-0.0379229	0.472652	0.485	0.714006	30	MTMR14:1147, PIP5K1C:1444, SYNJ2:2668, MTMR3:2836, PIP4K2A:3741, PI4K2B:4124, MTM1:5237, MTMR1:5912, PIK3R6:6433, INPP4B:7104	0.5883
REACTOME_SYNTHESIS_OF_DNA	-0.0308769	0.326626	0.486	0.600617	85	RPA1:379, ORC2:387, RFC5:940, ORC3:974, PSMD4:1271, CDKN1A:1333, RPA2:1856, ORC6:2164, PRIM1:2701, POLD4:2711	0.588322
KEGG_FOCAL_ADHESION	-0.0233473	0.265716	0.49	0.545957	194	IGF1R:94, VAV2:222, COL4A6:343, FN1:392, DOCK1:433, AKT3:541, PDGFA:706, ITGB7:808, RAPGEF1:848, PDGFD:886	0.588704
REACTOME_NONSENSE_MEDIATED_DECAY_ENHANCED_BY_THE_EXON_JUNCTION_COMPLEX	-0.0359317	0.303245	0.491	0.580973	69	RPS3:412, RPL28:745, RPL35:806, RPSA:872, RPLP0:2298, UPF3B:2520, RPL5:2654, RPS24:3358, RPS3A:3384, RPS6:3438	0.588704
REACTOME_ANTIGEN_PRESENTATION_FOLDING_ASSEMBLY_AND_PEPTIDE_LOADING_OF_CLASS_I_MHC	-0.0495097	0.443666	0.491	0.695559	20	SEC31A:2345, HLA-A:3165, HLA-F:3728, SEC24D:5252, B2M:6592, HSPA5:7031, ERAP1:7386, CALR:7700, SAR1B:8132, SEC13:8375	0.588704
ST_G_ALPHA_I_PATHWAY	-0.0384718	0.431457	0.492	0.688363	35	ITPR1:306, AKT3:541, SHC1:1107, SOS1:1341, PITX2:2096, KCNJ5:2409, RAF1:2773, ITPKB:2931, AKT1:3757, ITPR2:4644	0.588704
REACTOME_DESTABILIZATION_OF_MRNA_BY_BRF1	-0.0618649	0.377434	0.493	0.644006	17	MAPKAPK2:799, ZFP36L1:1037, EXOSC9:2225, AKT1:3757, XRN1:4043, DCP2:4587, EXOSC8:9131, EXOSC3:9439, EXOSC2:10007, EXOSC5:11569	0.588704
REACTOME_SIGNALING_BY_ERBB2	-0.0326708	0.283032	0.494	0.560351	91	NRG4:49, ADCY7:169, RNF41:254, CAMK4:489, AKT3:541, GAB1:646, RPS6KB2:691, EGF:919, SHC1:1107, TSC2:1156	0.588704
KEGG_ADHERENS_JUNCTION	-0.0322897	0.354887	0.495	0.62408	69	IGF1R:94, INSR:413, FER:671, WASL:794, RAC3:1742, WASF2:1821, TJP1:3547, SNAI2:3624, TCF7L1:3773, MLLT4:3974	0.588704
SA_B_CELL_RECEPTOR_COMPLEXES	-0.0464694	0.431044	0.495	0.688363	24	VAV2:222, SHC1:1107, ELK1:1165, SOS1:1341, VAV1:2038, MAP3K1:2324, LYN:4321, HRAS:5714, RAC1:6451, PAPPA:7425	0.588704
PID_THROMBIN_PAR4_PATHWAY	-0.0617287	0.441103	0.499	0.692543	13	GNA11:3352, GNA14:3663, GNAQ:3886, GNA13:4443, PLCB2:7801, F2:8627, F2RL2:8713, GNB1:10176, GNA15:10250, ROCK2:11742	0.588704
PID_REG_GR_PATHWAY	-0.0245447	0.449221	0.5	0.701164	80	IRF1:179, RELA:803, NFATC1:911, CDKN1A:1333, POMC:2246, PRL:2468, SELE:2587, BGLAP:3125, TP53:3130, IL5:3174	0.588704
BIOCARTA_EDG1_PATHWAY	-0.0377586	0.505508	0.5	0.736646	26	PDGFA:706, SPHKAP:739, PTK2:2115, ITGAV:2736, GNGT1:2936, AKT1:3757, PDGFRA:4848, S1PR1:6131, RAC1:6451, PLCB1:6489	0.588704
REACTOME_NUCLEOTIDE_EXCISION_REPAIR	-0.0372848	0.398297	0.501	0.661285	43	RPA1:379, POLR2G:384, ERCC4:442, RFC5:940, RPA2:1856, DDB2:2163, POLD4:2711, POLR2E:3039, RAD23B:3162, RPA3:4060	0.588704
KEGG_NOTCH_SIGNALING_PATHWAY	-0.0427808	0.311059	0.502	0.588446	47	RFNG:388, DVL2:1344, LFNG:1496, DLL1:1532, MAML3:1792, NOTCH1:3252, MAML2:3366, KAT2B:3432, ADAM17:4727, NCSTN:5385	0.588704
REACTOME_GAMMA_CARBOXYLATION_TRANSPORT_AND_AMINO_TERMINAL_CLEAVAGE_OF_PROTEINS	-0.0781001	0.392568	0.502	0.65411	10	PROS1:3533, VKORC1:7254, F7:8319, F10:8420, F9:8483, F2:8627, GGCX:9584, PROZ:10026, FURIN:11788, PROC:12546	0.588704
REACTOME_APOPTOSIS	-0.0197921	0.429548	0.503	0.688363	135	CASP10:123, TNFSF10:423, MAPT:505, KPNA1:507, FASLG:557, TNFRSF10B:695, TRAF2:896, RIPK1:941, APC:1066, CASP8:1146	0.588704
PID_TRKR_PATHWAY	-0.0370335	0.32621	0.504	0.600617	59	PTPN11:39, PRKCZ:246, DOCK1:433, NTF4:463, ABL1:583, GAB1:646, RAPGEF1:848, SHC1:1107, CRK:1250, SOS1:1341	0.588704
REACTOME_IL_7_SIGNALING	-0.0805805	0.354903	0.504	0.62408	11	IL7R:1104, IL7:1503, JAK3:5473, IL2RG:5921, HGF:6588, STAT5B:9321, PIK3R1:9659, STAT5A:10800, JAK1:14368, PIK3R3:14805	0.588704
BIOCARTA_TCR_PATHWAY	-0.0381971	0.392404	0.504	0.65411	42	NFATC2:38, RELA:803, NFATC1:911, PPP3CC:1012, SHC1:1107, ELK1:1165, SOS1:1341, NFKBIA:1497, VAV1:2038, MAP3K1:2324	0.588704
REACTOME_CASPASE_MEDIATED_CLEAVAGE_OF_CYTOSKELETAL_PROTEINS	-0.0835782	0.316275	0.506	0.591462	12	MAPT:505, CASP8:1146, CASP7:1615, SPTAN1:2174, CASP6:3906, PLEC:7157, DBNL:9241, CASP3:11432, ADD1:13872, GSN:15050	0.588745
KEGG_GLYCOSYLPHOSPHATIDYLINOSITOL_GPI_ANCHOR_BIOSYNTHESIS	-0.0517979	0.370392	0.506	0.636238	25	PIGM:631, PIGP:716, PIGN:2060, PGAP1:3635, PIGA:4160, PIGL:4533, PIGC:5099, PIGZ:5207, PIGQ:6434, DPM2:7084	0.588745
REACTOME_ACETYLCHOLINE_BINDING_AND_DOWNSTREAM_EVENTS	-0.0807039	0.279387	0.507	0.558774	15	CHRNB4:282, CHRNA5:1484, CHRNG:1538, CHRNA2:3985, CHRNB2:5686, CHRNB3:6385, CHRNA4:7728, CHRND:8843, CHRNA7:10040, CHRNA3:10216	0.588766
REACTOME_PI_3K_CASCADE	-0.0349128	0.375756	0.508	0.642001	54	KLB:116, FGFR2:391, AKT3:541, GAB1:646, RPS6KB2:691, TSC2:1156, CDKN1A:1333, FGF19:1808, FGF4:2513, FGF23:3521	0.588786
REACTOME_FORMATION_OF_THE_TERNARY_COMPLEX_AND_SUBSEQUENTLY_THE_43S_COMPLEX	-0.0435023	0.410035	0.513	0.668399	30	RPS3:412, EIF3K:788, RPSA:872, EIF3H:887, EIF3J:1559, RPS24:3358, RPS3A:3384, RPS6:3438, EIF3C:4110, RPS8:5946	0.593433
REACTOME_YAP1_AND_WWTR1_TAZ_STIMULATED_GENE_EXPRESSION	-0.0438887	0.466574	0.517	0.710525	23	WWTR1:4, YAP1:270, TBL1X:490, NPPA:1673, KAT2B:3432, TGS1:4423, RXRA:4832, NCOA6:5659, TEAD4:6979, NCOA3:7925	0.596908
REACTOME_DNA_STRAND_ELONGATION	-0.050137	0.342377	0.519	0.613571	30	RPA1:379, RFC5:940, RPA2:1856, PRIM1:2701, POLD4:2711, RPA3:4060, MCM8:5075, DNA2:5582, POLA2:6130, MCM5:7429	0.598065
BIOCARTA_CDMAC_PATHWAY	-0.0642904	0.388852	0.523	0.653796	15	RELA:803, NFKBIA:1497, RAF1:2773, TNF:3304, HRAS:5714, PLCB1:6489, FOS:7524, NFKB1:8261, MYC:10180, JUN:12026	0.600363
REACTOME_ENOS_ACTIVATION_AND_REGULATION	-0.0580822	0.421412	0.523	0.680006	16	WASL:794, GCH1:1449, AKT1:3757, LYPLA1:4831, HSP90AA1:4929, PTS:4938, GCHFR:7001, NOSIP:9216, DNM2:10173, DHFR:10675	0.600363
REACTOME_SIGNALING_BY_INSULIN_RECEPTOR	-0.0235568	0.408331	0.524	0.667438	104	KLB:116, TSC1:263, RPTOR:295, FGFR2:391, INSR:413, GAB1:646, EEF2K:761, SHC1:1107, TSC2:1156, CRK:1250	0.600363
NABA_ECM_REGULATORS	-0.0256709	0.185558	0.528	0.452562	228	PAPPA2:71, MMP25:106, ADAM19:155, ADAM12:185, ADAMTS4:189, MMP12:239, ADAMTS20:352, CTSF:461, PCSK5:510, ADAMTS12:529	0.602596
BIOCARTA_SRCRPTP_PATHWAY	-0.0590887	0.497531	0.528	0.731965	11	CDC25B:250, CCNB1:1522, CDC25C:2283, CSK:3395, CDK1:7046, CDC25A:8359, SRC:11165, PRKCA:13129, PTPRA:15984, PRKCB:16668	0.602596
REACTOME_SHC_RELATED_EVENTS	-0.0525466	0.467012	0.529	0.710525	16	INSR:413, SHC1:1107, SOS1:1341, RAF1:2773, SHC2:4092, HRAS:5714, CDK1:7046, SHC3:7757, NRAS:7867, YWHAB:12606	0.602596
PID_CXCR4_PATHWAY	-0.0279681	0.340446	0.532	0.613361	98	PTPN11:39, PRKCZ:246, GNAO1:426, STAT2:452, RGS1:1009, RALB:1135, CRK:1250, VAV1:2038, PTK2:2115, ITGAV:2736	0.602596
REACTOME_HEPARAN_SULFATE_HEPARIN_HS_GAG_METABOLISM	-0.0291729	0.471894	0.533	0.713855	51	VCAN:1096, SGSH:2500, GPC2:3188, GPC4:3291, NDST4:3461, GUSB:3501, HSPG2:3587, GXYLT1:3825, NAGLU:4366, GLB1:4602	0.602596
BIOCARTA_EXTRINSIC_PATHWAY	-0.0760188	0.342793	0.534	0.613571	13	TFPI:670, F5:1910, PROS1:3533, SERPINC1:3988, F7:8319, F10:8420, F2:8627, F2R:9644, F3:11150, FGG:12249	0.602596
BIOCARTA_AMI_PATHWAY	-0.0592107	0.359609	0.534	0.62528	20	COL4A6:343, TFPI:670, PROS1:3533, SERPINC1:3988, COL4A4:4304, COL4A3:6211, PLAT:6483, COL4A1:7671, F7:8319, F10:8420	0.602596
REACTOME_PLATELET_HOMEOSTASIS	-0.0331761	0.341834	0.535	0.613571	69	PPP2R5C:537, GNG7:869, GNG13:1103, TRPC6:1315, KCNMB2:1453, PLA2G4A:1739, ATP2B3:1927, GNB3:1963, GNAS:2077, PDE6G:2090	0.602596
PID_FAK_PATHWAY	-0.0308581	0.425368	0.535	0.683799	56	PTPN21:293, DOCK1:433, WASL:794, RAPGEF1:848, CRK:1250, SOS1:1341, CCND1:1723, PTK2:2115, GIT2:2313, ETS1:2317	0.602596
REACTOME_APOPTOTIC_EXECUTION_PHASE	-0.0321483	0.423445	0.538	0.681566	52	MAPT:505, KPNA1:507, APC:1066, CASP8:1146, CASP7:1615, BIRC2:1941, PTK2:2115, SPTAN1:2174, DFFA:3488, TJP1:3547	0.603689
REACTOME_DCC_MEDIATED_ATTRACTIVE_SIGNALING	-0.0622322	0.455551	0.538	0.703991	12	DOCK1:433, WASL:794, PTK2:2115, ABLIM1:2747, TRIO:4513, RAC1:6451, SRC:11165, DCC:11922, FYN:15154, NTN1:15316	0.603689
KEGG_CELL_ADHESION_MOLECULES_CAMS	-0.0281915	0.267561	0.54	0.547503	131	CD226:330, CD28:342, CLDN22:350, ITGB7:808, VCAN:1096, HLA-DPA1:1245, CD40:2024, CD80:2028, PVR:2155, F11R:2170	0.603689
BIOCARTA_EGF_PATHWAY	-0.0405284	0.4353	0.54	0.690709	31	STAT2:452, STAT6:592, EGF:919, SHC1:1107, ELK1:1165, SOS1:1341, MAP3K1:2324, RAF1:2773, HRAS:5714, FOS:7524	0.603689
PID_P75_NTR_PATHWAY	-0.0272687	0.437951	0.547	0.690802	68	IKBKG:160, PRKCZ:246, NTF4:463, TRAF6:1024, SHC1:1107, IRAK1:1183, BIRC2:1941, TP53:3130, ZNF274:3171, ARHGDIA:3466	0.610355
REACTOME_RNA_POL_II_TRANSCRIPTION	-0.0440069	0.177558	0.548	0.440619	79	CPSF2:192, POLR2G:384, CPSF1:1204, CSTF2:1300, SLBP:1359, SRRM1:1730, RNMT:1787, GTF2A2:2514, UPF3B:2520, SUPT5H:2764	0.610355
REACTOME_DOWNSTREAM_TCR_SIGNALING	-0.0356841	0.471993	0.55	0.713855	34	IKBKG:160, RELA:803, TRAF6:1024, HLA-DPA1:1245, NFKBIA:1497, MALT1:2143, CD4:3879, CHUK:4461, PDPK1:5608, CD3D:6653	0.611446
REACTOME_ACTIVATION_OF_GENES_BY_ATF4	-0.0414981	0.481951	0.554	0.719365	24	CCL2:1226, HERPUD1:1939, EXOSC9:2225, ATF6:3835, PARN:4320, DCP2:4587, ATF3:6552, IGFBP1:8239, NFYB:8652, EXOSC8:9131	0.614752
REACTOME_SRP_DEPENDENT_COTRANSLATIONAL_PROTEIN_TARGETING_TO_MEMBRANE	-0.0360987	0.287518	0.558	0.563774	73	RPS3:412, RPL28:745, RPL35:806, RPSA:872, RPLP0:2298, RPL5:2654, SRP9:2905, SSR2:3028, RPS24:3358, RPS3A:3384	0.615619
REACTOME_ELONGATION_ARREST_AND_RECOVERY	-0.0498345	0.440682	0.558	0.692543	20	POLR2G:384, SUPT5H:2764, SUPT16H:2961, POLR2E:3039, CCNT2:3592, POLR2F:6000, POLR2D:6871, GTF2F2:7285, CTDP1:7436, POLR2C:8716	0.615619
BIOCARTA_THELPER_PATHWAY	-0.0752652	0.347599	0.561	0.61957	13	CD28:342, THY1:3632, CD4:3879, CD2:4787, CD3D:6653, CD3G:7032, CD3E:8590, ITGAL:9226, CD247:11525, PTPRC:11853	0.615619
REACTOME_SIGNALING_BY_BMP	-0.0524145	0.417389	0.561	0.675219	20	GREM2:1549, BMPR1A:2968, CER1:3356, SKI:4042, BMPR1B:4196, NOG:4748, SMAD7:5532, FSTL1:5969, SMAD1:6039, BMPR2:7340	0.615619
ST_INTEGRIN_SIGNALING_PATHWAY	-0.0234427	0.469839	0.561	0.713855	80	DOCK1:433, AKT3:541, ABL1:583, SHC1:1107, CRK:1250, SOS1:1341, CDKN2A:1545, PTK2:2115, ILK:2474, ITGB3BP:2629	0.615619
REACTOME_IL_2_SIGNALING	-0.0282436	0.53708	0.561	0.768632	40	IL5RA:591, SHC1:1107, SOS1:1341, IL2RB:2361, RAF1:2773, IL5:3174, GAB2:3599, JAK3:5473, HRAS:5714, IL2RG:5921	0.615619
REACTOME_P2Y_RECEPTORS	-0.0637966	0.463906	0.563	0.70925	11	P2RY10:2120, P2RY12:2173, P2RY13:4138, GPR17:5891, P2RY4:6332, P2RY6:7492, LPAR6:8964, LPAR4:13154, P2RY1:14842, P2RY14:15767	0.615619
REACTOME_SYNTHESIS_SECRETION_AND_INACTIVATION_OF_GLP1	-0.0425645	0.543669	0.563	0.77201	17	GCG:860, GNG13:1103, GNB3:1963, GRP:2623, LEP:4720, CDX2:5177, GPR119:6837, SEC11A:7999, SPCS1:8833, PCSK1:10517	0.615619
REACTOME_ANTIVIRAL_MECHANISM_BY_IFN_STIMULATED_GENES	-0.0288652	0.43657	0.566	0.690709	61	NUP214:90, EIF4E2:404, KPNA1:507, NUP205:894, EIF4E3:1007, NUP50:1780, NUP188:1801, UBE2L6:2017, IRF3:2912, KPNA2:3425	0.617772
PID_SYNDECAN_4_PATHWAY	-0.0297243	0.567201	0.568	0.785727	31	ADAM12:185, FN1:392, TFPI:670, PTK2:2115, PRKCD:3553, FGF2:4349, FGFR1:5670, RAC1:6451, CXCR4:6487, CCL5:6993	0.618616
REACTOME_GENERIC_TRANSCRIPTION_PATHWAY	-0.0273117	0.103366	0.569	0.320637	308	WWTR1:4, ZNF202:150, ZNF213:243, YAP1:270, ZNF544:444, TBL1X:490, MED27:497, MAMLD1:573, ZNF577:603, ZNF33B:718	0.618616
REACTOME_MEIOTIC_SYNAPSIS	-0.0326555	0.41175	0.57	0.67034	53	ACD:142, SYCP2:327, SYNE2:397, HIST1H2BB:629, TEX12:666, ATR:947, SYNE1:1332, TERF1:1854, TINF2:2365, POT1:3842	0.618616
PID_SYNDECAN_2_PATHWAY	-0.0308487	0.552631	0.572	0.777822	31	FN1:392, CASK:1471, PRKCD:3553, ITGA2:4252, SDC2:5058, HRAS:5714, BAX:7101, LAMA1:7769, MAPK8:7853, PRKACA:8039	0.618616
KEGG_SYSTEMIC_LUPUS_ERYTHEMATOSUS	-0.0259193	0.369876	0.573	0.636238	101	CD28:342, C5:594, HIST1H2BB:629, C9:854, HIST1H2AH:891, HLA-DPA1:1245, C7:1891, CD40:2024, CD80:2028, C3:2266	0.618616
REACTOME_TRANSCRIPTION_COUPLED_NER_TC_NER	-0.032645	0.486778	0.574	0.721696	38	RPA1:379, POLR2G:384, ERCC4:442, RFC5:940, RPA2:1856, POLD4:2711, POLR2E:3039, RPA3:4060, POLE:4358, POLR2F:6000	0.618616
BIOCARTA_HER2_PATHWAY	-0.0360538	0.558561	0.574	0.780153	22	SHC1:1107, SOS1:1341, IL6R:1539, IL6ST:2151, RAF1:2773, IL6:5246, HRAS:5714, STAT3:7733, ESR1:7775, EP300:8785	0.618616
BIOCARTA_PDGF_PATHWAY	-0.0380431	0.456885	0.576	0.705176	32	STAT2:452, STAT6:592, PDGFA:706, SHC1:1107, ELK1:1165, SOS1:1341, MAP3K1:2324, RAF1:2773, PDGFRA:4848, HRAS:5714	0.619657
REACTOME_PLATELET_ACTIVATION_SIGNALING_AND_AGGREGATION	-0.0145968	0.497713	0.578	0.731965	184	F8:114, PRKCZ:246, FN1:392, GP5:528, AKT3:541, SRGN:698, PDGFA:706, GNG7:869, EGF:919, GNG13:1103	0.620694
REACTOME_INTRINSIC_PATHWAY_FOR_APOPTOSIS	-0.0337629	0.551585	0.58	0.777205	26	CASP8:1146, CASP7:1615, TP53:3130, AKT1:3757, BCL2:5991, E2F1:6377, BCL2L1:6875, BAX:7101, DIABLO:7155, CASP9:7210	0.621728
PID_AR_NONGENOMIC_PATHWAY	-0.0344447	0.521277	0.584	0.753611	29	GNAO1:426, GNRH1:792, PTK2:2115, RAF1:2773, AKT1:3757, PLCG2:4370, AR:4580, HRAS:5714, GNAZ:6037, RAC1:6451	0.623697
REACTOME_METAL_ION_SLC_TRANSPORTERS	-0.0313618	0.610856	0.585	0.815751	22	SLC41A2:1369, HEPH:2282, SLC30A3:2618, SLC39A1:3357, SLC30A1:3923, SLC39A4:4950, SLC39A3:6355, SLC39A5:6654, SLC30A5:7258, SLC39A7:8615	0.623697
REACTOME_TCR_SIGNALING	-0.0310329	0.444112	0.586	0.695559	51	IKBKG:160, RELA:803, TRAF6:1024, HLA-DPA1:1245, NFKBIA:1497, EVL:1653, MALT1:2143, CSK:3395, CD4:3879, LAT:3980	0.623697
PID_RAC1_PATHWAY	-0.0229393	0.57161	0.586	0.788896	51	CRK:1250, PIP5K1C:1444, WASF2:1821, MAP3K1:2324, PIP5K1A:2986, ARHGDIA:3466, PAK2:4175, CDH1:4281, IQGAP3:4465, RACGAP1:5161	0.623697
REACTOME_METABOLISM_OF_RNA	-0.0265182	0.198379	0.589	0.466903	201	NUP214:90, XPO1:403, RPS3:412, RPL28:745, MAPKAPK2:799, RPL35:806, GEMIN5:861, RPSA:872, NUP205:894, ANP32A:968	0.625545
PID_NFKAPPAB_ATYPICAL_PATHWAY	-0.0507856	0.482072	0.59	0.719365	16	RELA:803, NFKBIA:1497, REL:5677, ARRB2:5904, MAPK14:6244, NFKB1:8261, CSNK2A2:9655, PIK3R1:9659, BCL3:10945, SSPO:11078	0.625545
REACTOME_ADAPTIVE_IMMUNE_SYSTEM	-0.0143156	0.297113	0.591	0.574587	469	ASB6:25, ASB9:126, UBA5:132, IKBKG:160, WSB1:252, RNF41:254, CD160:328, CD226:330, CD28:342, CTSF:461	0.625545
PID_ARF_3PATHWAY	-0.0353071	0.61445	0.592	0.81884	17	COPA:1853, GGA3:2691, PIP5K1A:2986, GOSR2:3288, USO1:3480, CD4:3879, RAC1:6451, ASAP1:6629, CYTH2:10143, GBF1:10396	0.625545
PID_TCR_CALCIUM_PATHWAY	-0.0348926	0.530665	0.593	0.763728	27	NFATC2:38, FASLG:557, NFATC1:911, FKBP1A:1533, CD40LG:3155, AKAP5:4268, POU2F1:4572, IFNG:4722, NFATC3:7289, FOS:7524	0.625545
KEGG_BASAL_TRANSCRIPTION_FACTORS	-0.0431018	0.406714	0.594	0.667438	31	TAF2:2348, GTF2A2:2514, TAF10:2786, TAF6:3127, TAF11:4650, GTF2E1:4914, TAF13:5460, TAF1:5870, TAF4B:5961, GTF2E2:6197	0.625545
REACTOME_CHYLOMICRON_MEDIATED_LIPID_TRANSPORT	-0.0585906	0.432274	0.596	0.688363	15	LDLR:78, LDLRAP1:1267, APOA2:2249, APOB:2275, APOA1:3420, HSPG2:3587, P4HB:6813, APOC3:7335, SAR1B:8132, SDC1:13034	0.626454
REACTOME_APOPTOTIC_CLEAVAGE_OF_CELLULAR_PROTEINS	-0.0356028	0.44818	0.598	0.70107	38	MAPT:505, APC:1066, CASP8:1146, CASP7:1615, BIRC2:1941, PTK2:2115, SPTAN1:2174, TJP1:3547, PRKCD:3553, CASP6:3906	0.626454
REACTOME_SIGNALLING_TO_RAS	-0.0380775	0.493836	0.598	0.728779	27	MAPKAPK2:799, SHC1:1107, RALB:1135, SOS1:1341, RAF1:2773, MAPKAPK3:2914, SHC2:4092, HRAS:5714, MAPK14:6244, CDK1:7046	0.626454
REACTOME_SIGNALLING_TO_ERKS	-0.0352582	0.470918	0.601	0.713855	35	MAPKAPK2:799, RAPGEF1:848, SHC1:1107, RALB:1135, CRK:1250, SOS1:1341, RAF1:2773, MAPKAPK3:2914, SHC2:4092, HRAS:5714	0.628346
PID_VEGF_VEGFR_PATHWAY	-0.0607173	0.506257	0.603	0.736897	10	PGF:2094, FLT4:2781, FIGF:5364, FLT1:5571, VEGFA:6541, KDR:7954, NRP1:10649, VEGFC:14640, VEGFB:16592, NRP2:17351	0.628346
BIOCARTA_PLATELETAPP_PATHWAY	-0.0503281	0.514577	0.603	0.746458	14	COL4A6:343, COL4A4:4304, COL4A3:6211, PLAT:6483, COL4A1:7671, F9:8483, PLAU:8611, F2:8627, COL4A5:9238, SERPINE1:9338	0.628346
REACTOME_MRNA_PROCESSING	-0.0275946	0.283306	0.604	0.560351	128	NUP214:90, CPSF2:192, ADAR:302, POLR2G:384, RBM5:882, NUP205:894, CPSF1:1204, CSTF2:1300, SLBP:1359, YBX1:1713	0.628346
BIOCARTA_AT1R_PATHWAY	-0.0376899	0.482801	0.607	0.719365	29	MEF2A:69, SHC1:1107, ELK1:1165, SOS1:1341, PTK2:2115, MAP3K1:2324, RAF1:2773, GNAQ:3886, HRAS:5714, RAC1:6451	0.630372
PID_P38_ALPHA_BETA_PATHWAY	-0.029386	0.577867	0.609	0.792397	30	RIPK1:941, TRAF6:1024, RALB:1135, DUSP16:1720, CCM2:3226, PAK2:4175, LYN:4321, YES1:5696, PRKG1:5906, MAPK14:6244	0.631355
PID_IL8_CXCR1_PATHWAY	-0.0310399	0.577008	0.611	0.792069	27	PRKCE:2178, RAB5A:3449, CBL:3597, GNA14:3663, AKT1:3757, LYN:4321, CXCR1:5505, PDPK1:5608, ARRB2:5904, PIK3R6:6433	0.632277
REACTOME_MEIOTIC_RECOMBINATION	-0.0331826	0.387174	0.612	0.651921	57	CDK4:198, RPA1:379, NBN:549, HIST1H2BB:629, BLM:957, RPA2:1856, BRCA2:2576, MSH5:3400, MND1:3558, HIST1H2BG:3991	0.632277
BIOCARTA_INSULIN_PATHWAY	-0.0445721	0.47981	0.615	0.719365	21	PTPN11:39, INSR:413, SHC1:1107, ELK1:1165, SOS1:1341, IRS1:2430, RAF1:2773, HRAS:5714, FOS:7524, MAPK8:7853	0.634283
KEGG_OTHER_GLYCAN_DEGRADATION	-0.0474397	0.5114	0.619	0.742692	16	NEU1:1475, MAN2C1:2172, MANBA:3602, NEU2:4274, GLB1:4602, NEU3:6328, GBA:7141, MAN2B1:7590, HEXA:11284, HEXB:12409	0.637312
REACTOME_GLYCOSPHINGOLIPID_METABOLISM	-0.0398103	0.402647	0.621	0.665625	37	SUMF1:932, ARSK:963, STS:1274, NEU1:1475, ARSG:1965, GALC:2268, ARSJ:3506, NEU2:4274, GLB1:4602, PSAP:5038	0.638274
PID_LYMPH_ANGIOGENESIS_PATHWAY	-0.0304489	0.598505	0.627	0.810265	25	FN1:392, SHC1:1107, CRK:1250, SOS1:1341, FLT4:2781, AKT1:3757, ITGA2:4252, FIGF:5364, MAPK14:6244, PIK3R1:9659	0.643337
KEGG_ENDOMETRIAL_CANCER	-0.0260267	0.51696	0.631	0.748217	52	AKT3:541, EGF:919, APC:1066, ELK1:1165, SOS1:1341, CCND1:1723, ILK:2474, AXIN2:2540, RAF1:2773, TP53:3130	0.646335
PID_INTEGRIN_A4B1_PATHWAY	-0.0261331	0.609304	0.633	0.815382	32	FN1:392, DOCK1:433, CRK:1250, PTK2:2115, PXN:3020, YWHAZ:3080, AMICA1:3331, SPP1:4764, IGSF8:4959, THBS2:6171	0.647277
REACTOME_TRANSCRIPTIONAL_REGULATION_OF_WHITE_ADIPOCYTE_DIFFERENTIATION	-0.0209478	0.54269	0.637	0.771776	71	CDK4:198, TBL1X:490, MED27:497, RELA:803, MED22:1416, MED6:1468, MED26:2045, PCK1:2621, MED19:2930, MED29:3109	0.650258
PID_PI3KCI_PATHWAY	-0.0289434	0.507179	0.641	0.7374	44	PLEKHA1:655, CYTH3:1239, PLEKHA2:2436, BTK:3281, LAT:3980, ITK:4156, LYN:4321, PLCG2:4370, HSP90AA1:4929, DAPP1:5173	0.651014
REACTOME_EFFECTS_OF_PIP2_HYDROLYSIS	-0.0348583	0.563089	0.641	0.783704	23	TRPC6:1315, DGKD:1392, DGKA:1811, PRKCE:2178, DGKH:2380, DAGLB:2704, PRKCD:3553, ITPR2:4644, TRPC3:7882, DGKQ:8309	0.651014
REACTOME_PLATELET_SENSITIZATION_BY_LDL	-0.043347	0.574575	0.641	0.791279	14	PPP2R5C:537, PLA2G4A:1739, APOB:2275, LRP8:3763, MAPK14:6244, PPP2R5A:6333, FGR:8643, PTPN6:9368, PPP2R1A:10571, PPP2R1B:13094	0.651014
REACTOME_EARLY_PHASE_OF_HIV_LIFE_CYCLE	-0.0463272	0.563176	0.644	0.783704	13	CD4:3879, HMGA1:4168, XRCC4:4630, PSIP1:6421, CXCR4:6487, CCR5:7618, BANF1:8454, PPIA:10524, LIG1:12545, XRCC6:13020	0.651762
PID_REELIN_PATHWAY	-0.0314466	0.565018	0.644	0.784884	28	PAFAH1B1:451, MAPT:505, RAPGEF1:848, GSK3B:3505, CBL:3597, AKT1:3757, LRP8:3763, CDK5:4151, MAP2K7:5780, ITGA3:6194	0.651762
BIOCARTA_IL7_PATHWAY	-0.0371953	0.595647	0.645	0.809694	17	IL7R:1104, IL7:1503, JAK3:5473, IL2RG:5921, BCL2:5991, EP300:8785, CREBBP:9218, STAT5B:9321, PIK3R1:9659, NMI:10667	0.651762
REACTOME_RNA_POL_I_TRANSCRIPTION_TERMINATION	-0.0393247	0.542901	0.65	0.771776	20	TAF1C:103, TAF1B:844, POLR1A:1865, POLR1B:3239, UBTF:4781, GTF2H3:6930, MNAT1:7230, ERCC3:7411, TAF1A:8253, POLR1D:8796	0.655709
REACTOME_PERK_REGULATED_GENE_EXPRESSION	-0.0289091	0.603432	0.655	0.810751	27	CCL2:1226, HERPUD1:1939, EXOSC9:2225, ATF6:3835, PARN:4320, DCP2:4587, ATF3:6552, HSPA5:7031, IGFBP1:8239, NFYB:8652	0.659541
BIOCARTA_INTRINSIC_PATHWAY	-0.0440113	0.46533	0.656	0.710504	23	F8:114, COL4A6:343, F5:1910, PROS1:3533, SERPINC1:3988, COL4A4:4304, COL4A3:6211, COL4A1:7671, F10:8420, F9:8483	0.659541
BIOCARTA_CCR3_PATHWAY	-0.0237331	0.700182	0.658	0.868607	22	GNAS:2077, PTK2:2115, RAF1:2773, GNGT1:2936, CCR3:3189, GNAQ:3886, HRAS:5714, PLCB1:6489, CCL11:6663, NOX1:6714	0.660341
REACTOME_DESTABILIZATION_OF_MRNA_BY_TRISTETRAPROLIN_TTP	-0.04286	0.540875	0.659	0.771472	17	MAPKAPK2:799, EXOSC9:2225, ZFP36:3313, XRN1:4043, DCP2:4587, TNPO1:8342, EXOSC8:9131, EXOSC3:9439, EXOSC2:10007, EXOSC5:11569	0.660341
NABA_CORE_MATRISOME	-0.0177798	0.317945	0.663	0.591462	272	IGSF10:16, ZP4:36, CRIM1:77, VWA3A:117, IGFBP6:190, ZP2:268, ESM1:324, COL4A6:343, FN1:392, PAPLN:595	0.661307
REACTOME_GENERATION_OF_SECOND_MESSENGER_MOLECULES	-0.0342202	0.538615	0.663	0.769445	27	HLA-DPA1:1245, EVL:1653, CD4:3879, LAT:3980, ITK:4156, PAK2:4175, FYB:5907, ENAH:6034, CD3D:6653, CD3G:7032	0.661307
REACTOME_P38MAPK_EVENTS	-0.050293	0.530252	0.664	0.763728	13	MAPKAPK2:799, RALB:1135, MAPKAPK3:2914, HRAS:5714, MAPK14:6244, NRAS:7867, RALA:8118, SRC:11165, KRAS:13235, RALGDS:13735	0.661307
BIOCARTA_PAR1_PATHWAY	-0.0227974	0.636383	0.665	0.833297	36	ARHGEF5:1216, ARHGEF4:2839, GNGT1:2936, ARHGEF6:2998, ARHGEF12:3009, ARHGEF10:3353, GNAQ:3886, GNA13:4443, ARHGEF16:5863, PLCB1:6489	0.661307
REACTOME_IMMUNOREGULATORY_INTERACTIONS_BETWEEN_A_LYMPHOID_AND_A_NON_LYMPHOID_CELL	-0.0385459	0.315125	0.666	0.591379	57	CD160:328, CD226:330, ITGB7:808, KLRK1:962, CD40:2024, PVR:2155, C3:2266, KIR3DL2:2273, CD40LG:3155, HLA-A:3165	0.661307
REACTOME_PI_METABOLISM	-0.0165642	0.701102	0.667	0.868607	45	VAC14:563, MTMR14:1147, PIP5K1C:1444, OCRL:2539, SYNJ2:2668, MTMR3:2836, PIP4K2A:3741, PIK3R4:3751, PI4K2B:4124, MTM1:5237	0.661307
PID_PI3KCI_AKT_PATHWAY	-0.0283682	0.56747	0.669	0.785727	34	KPNA1:507, AKT3:541, CDKN1A:1333, RAF1:2773, YWHAZ:3080, GSK3B:3505, AKT1:3757, FOXO4:3833, CHUK:4461, HSP90AA1:4929	0.661307
REACTOME_SIGNALING_BY_ACTIVATED_POINT_MUTANTS_OF_FGFR1	-0.0388768	0.655357	0.669	0.85112	11	FGF4:2513, FGF23:3521, FGF2:4349, FGFR1:5670, FGF1:6121, FGF17:6829, FGF5:9656, FGF6:14406, FGF20:15627, FGF8:16210	0.661307
REACTOME_REGULATION_OF_MITOTIC_CELL_CYCLE	-0.0257104	0.458137	0.671	0.705176	70	PTTG1:373, ANAPC5:973, SKP2:1027, PSMD4:1271, CCNB1:1522, ANAPC7:1530, AURKA:2586, CDC26:3095, ANAPC2:4054, PSMF1:4357	0.661307
PID_IL2_1PATHWAY	-0.0208296	0.597187	0.671	0.809694	54	PTPN11:39, MAPKAPK2:799, SHC1:1107, SOS1:1341, DOK2:1463, IKZF3:2083, PRKCE:2178, IL2RB:2361, IRS1:2430, RAF1:2773	0.661307
REACTOME_ANTIGEN_ACTIVATES_B_CELL_RECEPTOR_LEADING_TO_GENERATION_OF_SECOND_MESSENGERS	-0.0286303	0.613645	0.676	0.818621	26	SHC1:1107, SOS1:1341, VAV1:2038, BTK:3281, CD79A:3502, CBL:3597, LYN:4321, PLCG2:4370, ITPR2:4644, PIK3AP1:4873	0.665141
REACTOME_GLUCOSE_TRANSPORT	-0.0315104	0.502047	0.683	0.734955	38	NUP214:90, NUP205:894, NUP50:1780, NUP188:1801, NUP93:3529, TPR:3645, G6PC2:4162, NUP133:4445, G6PC3:5226, NUP210:5303	0.670927
BIOCARTA_TCYTOTOXIC_PATHWAY	-0.0540327	0.500127	0.688	0.733826	13	CD28:342, THY1:3632, CD2:4787, CD3D:6653, CD3G:7032, CD3E:8590, ITGAL:9226, CD8A:9397, CD247:11525, PTPRC:11853	0.674732
REACTOME_MTORC1_MEDIATED_SIGNALLING	-0.0364393	0.675692	0.69	0.859873	11	RPTOR:295, EEF2K:761, RHEB:2874, RPS6:3438, EIF4E:7789, MTOR:7983, EIF4B:12269, RPS6KB1:14190, EIF4G1:15215, EIF4EBP1:18566	0.675588
BIOCARTA_CTL_PATHWAY	-0.0542997	0.481957	0.694	0.719365	14	FASLG:557, HLA-A:3165, PRF1:5602, B2M:6592, CD3D:6653, CD3G:7032, CD3E:8590, ITGAL:9226, GZMB:11329, CD247:11525	0.678267
REACTOME_GAB1_SIGNALOSOME	-0.0269795	0.575828	0.695	0.792069	36	AKT3:541, GAB1:646, RPS6KB2:691, EGF:919, TSC2:1156, CDKN1A:1333, CSK:3395, AKT1S1:3560, AKT1:3757, FOXO4:3833	0.678267
BIOCARTA_TFF_PATHWAY	-0.0246354	0.703085	0.698	0.868607	20	GHR:436, SHC1:1107, SOS1:1341, GH1:1436, PTK2:2115, AKT1:3757, HRAS:5714, CASP9:7210, PIK3R1:9659, ITGB1:10853	0.680087
REACTOME_NITRIC_OXIDE_STIMULATES_GUANYLATE_CYCLASE	-0.028418	0.623122	0.7	0.825216	25	KCNMB2:1453, PDE6G:2090, PDE10A:2353, PDE5A:2471, KCNMB1:3326, PDE3A:4061, KCNMB3:5647, PRKG1:5906, NOS2:7061, PDE1A:8128	0.680928
REACTOME_FGFR1_LIGAND_BINDING_AND_ACTIVATION	-0.0266643	0.729875	0.703	0.884476	14	FGF4:2513, FGF23:3521, FGF2:4349, FGFR1:5670, FGF3:5810, FGF1:6121, FGF10:6808, FGF17:6829, FGF5:9656, FGF6:14406	0.682738
KEGG_LYSOSOME	-0.0160899	0.551177	0.705	0.777205	116	CTSF:461, LAPTM4B:584, CTSK:841, SUMF1:932, LAPTM5:1115, IGF2R:1253, NEU1:1475, ARSG:1965, CTSS:2234, GALC:2268	0.683301
KEGG_MELANOGENESIS	-0.0182147	0.538852	0.706	0.769445	96	ADCY7:169, EDN1:170, WNT8A:236, GNAO1:426, MITF:731, DVL2:1344, WNT7A:1923, KITLG:2069, GNAS:2077, POMC:2246	0.683301
PID_GLYPICAN_1PATHWAY	-0.0216125	0.697751	0.707	0.868607	27	SERPINC1:3988, SLIT2:4069, NRG1:4214, LYN:4321, FGF2:4349, TGFBR2:5168, FLT1:5571, FGFR1:5670, YES1:5696, VEGFA:6541	0.683301
PID_RHODOPSIN_PATHWAY	-0.0495197	0.401417	0.709	0.664523	24	PDE6G:2090, SLC24A1:2592, GNGT1:2936, GUCY2F:2942, CNGA1:2991, GUCA1B:4189, RGS9BP:5100, GUCY2D:6573, GUCA1A:9180, SAG:9332	0.683858
SA_PTEN_PATHWAY	-0.0336711	0.63095	0.711	0.829582	17	AKT3:541, SHC1:1107, SOS1:1341, ILK:2474, AKT1:3757, PDK1:4703, RBL2:7714, PTEN:10344, PTK2B:11282, PIK3CA:11302	0.683858
ST_MYOCYTE_AD_PATHWAY	-0.025488	0.646954	0.711	0.844543	27	ITPR1:306, APC:1066, PITX2:2096, KCNJ5:2409, AKT1:3757, GNAQ:3886, KAT5:4195, CAV3:4340, ITPR2:4644, GAST:5332	0.683858
BIOCARTA_MTOR_PATHWAY	-0.0309425	0.623755	0.713	0.825216	21	TSC1:263, TSC2:1156, FKBP1A:1533, RPS6:3438, AKT1:3757, EIF4G2:5607, PDPK1:5608, EIF4E:7789, MTOR:7983, PIK3R1:9659	0.684409
PID_TCR_JNK_PATHWAY	-0.0344327	0.655677	0.715	0.85112	14	CRK:1250, MAP3K1:2324, MAP4K1:3379, LAT:3980, MAPK8:7853, LCP2:8640, DBNL:9241, GRAP2:10593, MAP2K4:11109, JUN:12026	0.684409
SIG_PIP3_SIGNALING_IN_CARDIAC_MYOCTES	-0.0159477	0.657335	0.715	0.85112	65	TSC1:263, AKT3:541, GAB1:646, IGF1:1014, RPS6KA2:1092, SHC1:1107, TSC2:1156, CYTH3:1239, SOS1:1341, CDKN2A:1545	0.684409
REACTOME_DESTABILIZATION_OF_MRNA_BY_KSRP	-0.0374404	0.593226	0.719	0.808431	17	EXOSC9:2225, YWHAZ:3080, AKT1:3757, PARN:4320, DCP2:4587, MAPK14:6244, EXOSC8:9131, EXOSC3:9439, EXOSC2:10007, KHSRP:10848	0.685771
REACTOME_APOPTOSIS_INDUCED_DNA_FRAGMENTATION	-0.0316509	0.692856	0.719	0.867258	13	KPNA1:507, DFFA:3488, KPNB1:7086, HMGB2:8512, DFFB:9150, HIST1H1C:9861, HIST1H1B:10365, H1F0:11292, CASP3:11432, HIST1H1E:11629	0.685771
REACTOME_MRNA_CAPPING	-0.0333282	0.572255	0.721	0.788934	24	POLR2G:384, RNMT:1787, SUPT5H:2764, POLR2E:3039, NCBP1:5597, POLR2F:6000, POLR2D:6871, GTF2H3:6930, MNAT1:7230, GTF2F2:7285	0.685771
BIOCARTA_CTCF_PATHWAY	-0.026915	0.662328	0.721	0.855005	22	CDKN2A:1545, TP53:3130, CD79A:3502, CDKN1B:4952, TGFBR2:5168, SMAD1:6039, MTOR:7983, SMAD5:8160, TGFB2:9493, PIK3R1:9659	0.685771
REACTOME_PI3K_CASCADE	-0.0135326	0.702375	0.726	0.868607	67	KLB:116, TSC1:263, RPTOR:295, FGFR2:391, INSR:413, GAB1:646, EEF2K:761, TSC2:1156, TLR9:1289, FGF19:1808	0.689432
PID_AVB3_INTEGRIN_PATHWAY	-0.0180019	0.593356	0.732	0.808431	74	PTPN11:39, IGF1R:94, COL4A6:343, FN1:392, IGF1:1014, CASP8:1146, MFGE8:2003, PTK2:2115, F11R:2170, IRS1:2430	0.693582
REACTOME_ACTIVATION_OF_KAINATE_RECEPTORS_UPON_GLUTAMATE_BINDING	-0.0250538	0.684373	0.733	0.863405	22	GNG7:869, GNG13:1103, GNB3:1963, GNGT1:2936, GNG4:4297, GNGT2:5800, PLCB1:6489, PLCB2:7801, DLG1:9231, DLG3:9237	0.693582
KEGG_INOSITOL_PHOSPHATE_METABOLISM	-0.0127909	0.745555	0.734	0.896349	54	PLCZ1:443, PIP5K1C:1444, INPP5A:2401, OCRL:2539, SYNJ2:2668, PLCD4:2700, ITPKB:2931, PIP5K1A:2986, PIP4K2C:3209, CDIPT:3351	0.693582
KEGG_NON_SMALL_CELL_LUNG_CANCER	-0.0194758	0.621233	0.735	0.825216	54	CDK4:198, E2F3:419, AKT3:541, E2F2:721, EGF:919, SOS1:1341, CDKN2A:1545, CCND1:1723, RAF1:2773, TP53:3130	0.693582
REACTOME_NEF_MEDIATES_DOWN_MODULATION_OF_CELL_SURFACE_RECEPTORS_BY_RECRUITING_THEM_TO_CLATHRIN_ADAPTERS	-0.0275764	0.71167	0.739	0.873486	15	CD28:342, AP2A2:1712, HLA-A:3165, CD4:3879, B2M:6592, CD8B:7559, ATP6V1H:7753, AP1B1:10554, AP1M2:11168, PACS1:12572	0.694717
REACTOME_PROCESSING_OF_CAPPED_INTRON_CONTAINING_PRE_MRNA	-0.0196095	0.483163	0.742	0.719365	108	NUP214:90, CPSF2:192, POLR2G:384, RBM5:882, NUP205:894, CPSF1:1204, CSTF2:1300, SLBP:1359, YBX1:1713, SRRM1:1730	0.694717
REACTOME_FORMATION_OF_THE_HIV1_EARLY_ELONGATION_COMPLEX	-0.027651	0.64645	0.742	0.844543	23	POLR2G:384, SUPT5H:2764, POLR2E:3039, NCBP1:5597, POLR2F:6000, POLR2D:6871, GTF2H3:6930, MNAT1:7230, GTF2F2:7285, ERCC3:7411	0.694717
REACTOME_REGULATION_OF_INSULIN_LIKE_GROWTH_FACTOR_IGF_ACTIVITY_BY_INSULIN_LIKE_GROWTH_FACTOR_BINDING_PROTEINS_IGFBPS	-0.0312309	0.665525	0.742	0.855776	16	PAPPA2:71, IGFBP6:190, IGFBP3:5359, PAPPA:7425, IGFALS:7470, IGFBP2:8057, IGFBP1:8239, MMP2:8494, F2:8627, IGFBP5:9243	0.694717
KEGG_RENAL_CELL_CARCINOMA	-0.0145968	0.682462	0.742	0.863405	66	PTPN11:39, AKT3:541, GAB1:646, RAPGEF1:848, CRK:1250, SOS1:1341, PGF:2094, ETS1:2317, RAF1:2773, ARNT:3535	0.694717
REACTOME_REGULATION_OF_MRNA_STABILITY_BY_PROTEINS_THAT_BIND_AU_RICH_ELEMENTS	-0.018562	0.579396	0.744	0.792792	75	NUP214:90, XPO1:403, MAPKAPK2:799, ANP32A:968, ZFP36L1:1037, PSMD4:1271, EXOSC9:2225, YWHAZ:3080, ZFP36:3313, PRKCD:3553	0.695503
PID_TXA2PATHWAY	-0.0138325	0.72564	0.75	0.883905	54	PRKCZ:246, EGF:919, PRKCE:2178, SELE:2587, PTGDR:2917, GNA11:3352, PRKCD:3553, GNA14:3663, AKT1:3757, SLC9A3R1:3834	0.698931
ST_WNT_BETA_CATENIN_PATHWAY	-0.0154118	0.756076	0.75	0.902209	34	AKT3:541, RPSA:872, APC:1066, CBY1:1378, AXIN2:2540, CER1:3356, GSK3B:3505, AKT1:3757, ANKRD6:4101, CSNK1A1:5163	0.698931
REACTOME_PIP3_ACTIVATES_AKT_SIGNALING	-0.0236615	0.670707	0.756	0.857163	27	AKT3:541, RPS6KB2:691, TSC2:1156, CDKN1A:1333, AKT1S1:3560, AKT1:3757, FOXO4:3833, CHUK:4461, CDKN1B:4952, PDPK1:5608	0.701251
BIOCARTA_TRKA_PATHWAY	-0.032417	0.697502	0.756	0.868607	12	SHC1:1107, SOS1:1341, AKT1:3757, HRAS:5714, NGF:7640, NTRK1:8858, PIK3R1:9659, PIK3CA:11302, PRKCA:13129, PLCG1:16355	0.701251
PID_MTOR_4PATHWAY	-0.0126164	0.72564	0.756	0.883905	65	TSC1:263, RPTOR:295, RRN3:740, EEF2K:761, TSC2:1156, CLIP1:1170, YY1:1339, IRS1:2430, RAF1:2773, RHEB:2874	0.701251
PID_INTEGRIN3_PATHWAY	-0.0235842	0.59745	0.758	0.809694	42	COL4A6:343, FN1:392, LAMA4:1476, PVR:2155, F11R:2170, ITGAV:2736, THY1:3632, L1CAM:3755, PDGFRB:4064, COL4A4:4304	0.702019
REACTOME_NUCLEOTIDE_LIKE_PURINERGIC_RECEPTORS	-0.0285971	0.701501	0.764	0.868607	15	P2RY10:2120, P2RY12:2173, P2RY13:4138, GPR17:5891, ADORA3:5892, P2RY4:6332, P2RY6:7492, LPAR6:8964, ADORA2B:10632, ADORA1:12858	0.704149
KEGG_PHOSPHATIDYLINOSITOL_SIGNALING_SYSTEM	-0.0106027	0.754746	0.764	0.901463	73	ITPR1:306, PLCZ1:443, DGKD:1392, PIP5K1C:1444, DGKA:1811, DGKH:2380, INPP5A:2401, OCRL:2539, SYNJ2:2668, PLCD4:2700	0.704149
BIOCARTA_DNAFRAGMENT_PATHWAY	-0.0201861	0.825109	0.764	0.929607	10	CASP7:1615, DFFA:3488, TOP2A:7002, HMGB2:8512, DFFB:9150, GZMB:11329, CASP3:11432, HMGB1:13144, TOP2B:15695, ENDOG:16534	0.704149
NABA_ECM_AFFILIATED	-0.0119592	0.601664	0.765	0.810751	162	C1QTNF6:474, C1QTNF1:540, SEMA4B:572, CLEC9A:574, LGALS12:912, SEMA4C:1331, MUC20:1434, LMAN1:1548, CLEC18A:1597, CLEC14A:1627	0.704149
PID_HNF3A_PATHWAY	-0.0141622	0.751164	0.769	0.901397	42	GCG:860, APOB:2275, NFIC:2449, SFTPD:3758, POU2F1:4572, AR:4580, NKX3-1:4590, SCGB1A1:4658, CDKN1B:4952, FOXA3:5472	0.706745
REACTOME_KERATAN_SULFATE_DEGRADATION	-0.0273684	0.753362	0.771	0.901463	11	OMD:4010, GLB1:4602, OGN:5325, KERA:6984, LUM:7499, HEXA:11284, FMOD:11801, HEXB:12409, ACAN:13455, PRELP:14119	0.707498
REACTOME_BASIGIN_INTERACTIONS	-0.0242438	0.681218	0.774	0.862831	24	SLC16A1:157, SLC7A6:1032, ATP1B1:3749, L1CAM:3755, SLC3A2:4290, SLC16A3:4361, SLC7A7:6082, ITGA3:6194, ATP1B3:9410, MMP1:9725	0.709165
REACTOME_ANDROGEN_BIOSYNTHESIS	-0.0389277	0.670003	0.777	0.857163	10	LHB:863, POMC:2246, SRD5A2:3273, CGA:8742, SRD5A1:9990, HSD3B2:10094, HSD3B1:13875, CYP17A1:13973, SRD5A3:14227, HSD17B3:16509	0.709407
REACTOME_SIGNALING_BY_NOTCH	-0.0174824	0.563555	0.778	0.783704	92	MOV10:275, RFNG:388, E2F3:419, TBL1X:490, MAMLD1:573, TNRC6B:1208, LFNG:1496, DLL1:1532, TNRC6C:1542, HDAC7:1693	0.709407
REACTOME_FORMATION_OF_TUBULIN_FOLDING_INTERMEDIATES_BY_CCT_TRIC	-0.0187488	0.766293	0.778	0.909583	21	TUBB4B:1203, TUBA1B:2682, TUBB1:2988, TUBB2B:3059, CCT7:3748, CCT5:3864, TUBA4A:4654, TUBB3:7140, TUBA1A:8542, TUBB2A:8618	0.709407
REACTOME_METABOLISM_OF_MRNA	-0.0134998	0.554495	0.779	0.778011	163	NUP214:90, XPO1:403, RPS3:412, RPL28:745, MAPKAPK2:799, RPL35:806, RPSA:872, ANP32A:968, ZFP36L1:1037, PSMD4:1271	0.709407
PID_WNT_NONCANONICAL_PATHWAY	-0.0178059	0.735965	0.784	0.889001	30	NFATC2:38, PRKCZ:246, DVL2:1344, ROR2:2362, FLNA:3661, CSNK1A1:5163, NLK:5372, YES1:5696, CTHRC1:5712, ARRB2:5904	0.710117
ST_ERK1_ERK2_MAPK_PATHWAY	-0.0187974	0.717471	0.785	0.878283	31	DUSP9:307, EEF2K:761, RPS6KA2:1092, SHC1:1107, SOS1:1341, KLF6:2718, DUSP6:2854, MKNK2:3041, MOS:4013, ARAF:4016	0.710117
REACTOME_SHC_MEDIATED_SIGNALLING	-0.0239343	0.748363	0.786	0.89888	15	SHC1:1107, SOS1:1341, RAF1:2773, SHC2:4092, HRAS:5714, CDK1:7046, SHC3:7757, NRAS:7867, YWHAB:12606, KRAS:13235	0.710117
REACTOME_ACTIVATION_OF_RAC	-0.0234273	0.770014	0.788	0.909583	13	SOS1:1341, SLIT2:4069, PAK2:4175, PAK4:5027, ROBO1:6296, RAC1:6451, NCK2:9136, PAK7:11042, SOS2:11747, GPC1:14683	0.710117
REACTOME_DOWNSTREAM_SIGNALING_OF_ACTIVATED_FGFR	-0.0128218	0.670206	0.791	0.857163	93	KLB:116, ADCY7:169, FGFR2:391, CAMK4:489, AKT3:541, GAB1:646, RPS6KB2:691, SHC1:1107, TSC2:1156, CDKN1A:1333	0.710117
REACTOME_ABACAVIR_TRANSPORT_AND_METABOLISM	-0.0350594	0.701128	0.791	0.868607	10	SLC22A1:2297, PCK1:2621, SLC22A3:5775, SLC22A2:7018, ADAL:10330, ABCB1:10636, ABCG2:13031, ADH1A:13320, NT5C2:14918, GUK1:15291	0.710117
KEGG_TGF_BETA_SIGNALING_PATHWAY	-0.0142712	0.657986	0.792	0.85112	81	AMHR2:85, RPS6KB2:691, CDKN2B:1414, BMP8B:1516, E2F5:1683, ID2:1705, PITX2:2096, INHBC:2606, BMP8A:2672, BMPR1A:2968	0.710117
PID_P53_DOWNSTREAM_PATHWAY	-0.00932701	0.711718	0.792	0.873486	133	CASP10:123, SH2D1A:415, E2F3:419, C12orf5:596, CEBPZ:607, TNFRSF10B:695, E2F2:721, BCL2A1:965, APC:1066, VCAN:1096	0.710117
REACTOME_CYCLIN_E_ASSOCIATED_EVENTS_DURING_G1_S_TRANSITION_	-0.0159578	0.680172	0.793	0.86236	56	SKP2:1027, PSMD4:1271, CDKN1A:1333, PKMYT1:3079, RB1:3246, PSMF1:4357, WEE1:4805, CDKN1B:4952, PSMD13:5105, CUL1:5190	0.710117
REACTOME_SHC1_EVENTS_IN_EGFR_SIGNALING	-0.0196799	0.791953	0.793	0.917623	15	EGF:919, SHC1:1107, SOS1:1341, RAF1:2773, HRAS:5714, CDK1:7046, NRAS:7867, EGFR:11512, YWHAB:12606, KRAS:13235	0.710117
REACTOME_CLEAVAGE_OF_GROWING_TRANSCRIPT_IN_THE_TERMINATION_REGION_	-0.0249018	0.626267	0.794	0.826827	32	CPSF2:192, CPSF1:1204, CSTF2:1300, SLBP:1359, SRRM1:1730, UPF3B:2520, ZNF473:3170, NCBP1:5597, DHX38:5639, CPSF7:6087	0.710117
REACTOME_DOWNREGULATION_OF_TGF_BETA_RECEPTOR_SIGNALING	-0.0269098	0.692819	0.794	0.867258	18	PMEPA1:349, XPO1:403, PPP1R15A:865, UCHL5:1893, PPP1CC:3639, STRAP:3943, TGFBR2:5168, SMAD7:5532, TGFB1:11798, STUB1:12224	0.710117
REACTOME_ASSEMBLY_OF_THE_PRE_REPLICATIVE_COMPLEX	-0.0163454	0.66744	0.803	0.856414	58	ORC2:387, E2F3:419, E2F2:721, GMNN:904, ORC3:974, PSMD4:1271, ORC6:2164, ORC1:2726, CDC6:3930, PSMF1:4357	0.71692
REACTOME_HIV_INFECTION	-0.00975109	0.665733	0.804	0.855776	167	NUP214:90, CD28:342, POLR2G:384, XPO1:403, KPNA1:507, NUP205:894, PSMD4:1271, AP2A2:1712, NUP50:1780, RNMT:1787	0.71692
REACTOME_DOWNSTREAM_SIGNAL_TRANSDUCTION	-0.011338	0.715585	0.806	0.876814	87	ADCY7:169, CAMK4:489, AKT3:541, STAT6:592, RPS6KB2:691, PDGFA:706, RAPGEF1:848, TSC2:1156, CRK:1250, CDKN1A:1333	0.717636
BIOCARTA_FREE_PATHWAY	-0.028143	0.758019	0.808	0.903683	10	RELA:803, TNF:3304, GPX1:6265, NOX1:6714, GSS:7892, NFKB1:8261, IL8:9652, GSR:16824, SOD1:17117, XDH:18454	0.718349
KEGG_REGULATION_OF_AUTOPHAGY	-0.021475	0.684238	0.815	0.863405	30	IFNA1:875, IFNA21:1232, IFNA8:1246, IFNA4:1812, IFNA6:2627, PIK3R4:3751, IFNA10:4255, IFNG:4722, IFNA17:6031, IFNA2:6835	0.723499
REACTOME_SIGNALING_BY_FGFR3_MUTANTS	-0.023907	0.783724	0.817	0.917215	11	FGF4:2513, FGF23:3521, FGF2:4349, FGFR3:4657, FGF1:6121, FGF17:6829, FGF5:9656, FGF20:15627, FGF8:16210, FGF18:17957	0.724202
REACTOME_INSULIN_RECEPTOR_RECYCLING	-0.0200999	0.74433	0.82	0.896349	22	INSR:413, ATP6V1F:1365, ATP6V1C1:1929, ATP6V0B:4937, ATP6V1E2:6159, ATP6V1B2:6817, ATP6V0D1:6949, ATP6V1H:7753, ATP6V1G2:7806, ATP6V1B1:8226	0.725601
REACTOME_TGF_BETA_RECEPTOR_SIGNALING_ACTIVATES_SMADS	-0.0235235	0.709207	0.821	0.872345	21	PMEPA1:349, XPO1:403, PPP1R15A:865, FKBP1A:1533, UCHL5:1893, PPP1CC:3639, STRAP:3943, TGFBR2:5168, SMAD7:5532, FURIN:11788	0.725601
PID_DNA_PK_PATHWAY	-0.0284011	0.70345	0.833	0.868607	15	NHEJ1:2383, POLM:4583, PNKP:4625, XRCC4:4630, DNTT:7286, DCLRE1C:8970, CSNK2A2:9655, APLF:9895, PRKDC:10343, CSNK2A1:12911	0.734524
REACTOME_INFLAMMASOMES	-0.0257411	0.721609	0.834	0.880818	16	MEFV:1953, TXN:3953, CASP1:4077, BCL2:5991, NLRC4:6319, BCL2L1:6875, PYCARD:8133, PSTPIP1:10470, P2RX7:11072, PANX1:11706	0.734524
BIOCARTA_AKAP13_PATHWAY	-0.0166728	0.855176	0.835	0.943795	10	AKAP13:20, LPAR2:80, GNA13:4443, LPAR1:9629, PRKAR2A:10302, GNA12:10583, LPAR3:13568, PRKACB:15211, PRKAR2B:16659, PRKAG1:16688	0.734524
PID_ECADHERIN_STABILIZATION_PATHWAY	-0.0087265	0.848754	0.836	0.941587	40	IGF1R:94, EXOC4:203, EGF:919, IGF1:1014, PIP5K1C:1444, EFNA1:1774, MLLT4:3974, CDH1:4281, EPHA2:5112, ENAH:6034	0.734524
REACTOME_PI3K_AKT_ACTIVATION	-0.0143173	0.769697	0.838	0.909583	35	AKT3:541, RPS6KB2:691, TSC2:1156, CDKN1A:1333, IRS1:2430, AKT1S1:3560, AKT1:3757, FOXO4:3833, CHUK:4461, CDKN1B:4952	0.735005
REACTOME_METABOLISM_OF_PROTEINS	-0.00608699	0.689272	0.839	0.866505	377	EDEM1:147, C1GALT1C1:176, ST6GALNAC2:211, GALNTL5:257, RPS3:412, PIGM:631, DPAGT1:662, PIGP:716, FBXL5:730, RPL28:745	0.735005
BIOCARTA_MAPK_PATHWAY	-0.00892531	0.775495	0.841	0.911874	86	MAP3K4:9, MEF2A:69, RPS6KA5:559, RPS6KB2:691, MAPKAPK2:799, RELA:803, TRAF2:896, RIPK1:941, RPS6KA2:1092, SHC1:1107	0.735482
KEGG_TERPENOID_BACKBONE_BIOSYNTHESIS	-0.0216642	0.771532	0.842	0.909611	15	GGPS1:562, ACAT2:976, DHDDS:1306, FDPS:4086, MVK:4726, MVD:4880, PMVK:8437, PDSS1:10391, IDI2:11211, HMGCS1:11556	0.735482
KEGG_ONE_CARBON_POOL_BY_FOLATE	-0.0176571	0.801105	0.845	0.923185	17	GART:1886, MTR:4087, ALDH1L1:6133, AMT:6339, MTHFR:6579, MTFMT:6992, MTHFD2:7433, MTHFS:7930, SHMT2:8273, DHFR:10675	0.736429
REACTOME_FGFR2C_LIGAND_BINDING_AND_ACTIVATION	-0.0193461	0.816562	0.846	0.926402	12	FGFR2:391, FGF4:2513, FGF23:3521, FGF2:4349, FGF1:6121, FGF17:6829, FGF5:9656, FGF6:14406, FGF20:15627, FGF8:16210	0.736429
REACTOME_FGFR4_LIGAND_BINDING_AND_ACTIVATION	-0.0227032	0.785452	0.848	0.917557	12	FGF19:1808, FGF4:2513, FGF23:3521, FGF2:4349, FGF1:6121, FGF17:6829, FGFR4:7740, FGF6:14406, FGF20:15627, FGF8:16210	0.736429
REACTOME_SIGNALING_BY_NOTCH4	-0.0169279	0.839156	0.848	0.93663	12	DLL1:1532, NCSTN:5385, JAG2:6738, NOTCH4:7828, PSEN1:8292, APH1B:8881, JAG1:11359, PSEN2:11703, APH1A:11901, PSENEN:12534	0.736429
REACTOME_TRANSCRIPTIONAL_ACTIVITY_OF_SMAD2_SMAD3_SMAD4_HETEROTRIMER	-0.0161447	0.752206	0.851	0.901463	32	WWTR1:4, CDKN2B:1414, E2F5:1683, TGIF1:2904, PPM1A:3157, CCNT2:3592, SKI:4042, E2F4:4063, SMAD7:5532, SKIL:6473	0.737365
KEGG_PENTOSE_PHOSPHATE_PATHWAY	-0.0134071	0.813103	0.852	0.926402	26	PGD:289, G6PD:493, PFKL:1607, H6PD:1777, RBKS:2114, GPI:2830, FBP1:3460, PRPS1:3634, TALDO1:4053, PRPS2:4147	0.737365
BIOCARTA_VDR_PATHWAY	-0.0220399	0.791573	0.853	0.917623	12	TSC2:1156, KAT2B:3432, RXRA:4832, NCOA3:7925, EP300:8785, MED1:8825, CREBBP:9218, CARM1:11897, NCOA1:12260, HDAC1:13639	0.737365
REACTOME_PHOSPHOLIPASE_C_MEDIATED_CASCADE	-0.0112032	0.786521	0.854	0.917623	49	KLB:116, ADCY7:169, FGFR2:391, CAMK4:489, FGF19:1808, PRKCE:2178, FGF4:2513, FGF23:3521, PRKCD:3553, KL:3712	0.737365
REACTOME_CREB_PHOSPHORYLATION_THROUGH_THE_ACTIVATION_OF_RAS	-0.0110617	0.851318	0.857	0.941978	24	RPS6KA2:1092, RAF1:2773, RPS6KA6:3580, AKAP9:4367, RASGRF1:4833, PDPK1:5608, CAMK2B:5637, HRAS:5714, CAMK2D:6343, GRIN2D:6593	0.73869
REACTOME_REGULATION_OF_INSULIN_SECRETION_BY_GLUCAGON_LIKE_PEPTIDE1	-0.0137209	0.779036	0.858	0.913402	35	GCG:860, GNG7:869, GNG13:1103, GNB3:1963, GNAS:2077, GNGT1:2936, KCNB1:3456, AKAP5:4268, GNG4:4297, ITPR2:4644	0.73869
BIOCARTA_BCELLSURVIVAL_PATHWAY	-0.0117221	0.871103	0.861	0.949712	16	BIRC5:1507, CASP7:1615, AKT1:3757, FOS:7524, MTOR:7983, PIK3R1:9659, ITGA1:9749, ITGB1:10853, PIK3CA:11302, ZBTB7A:11336	0.739605
BIOCARTA_GH_PATHWAY	-0.0131211	0.813608	0.862	0.926402	27	INSR:413, GHR:436, SHC1:1107, SOS1:1341, GH1:1436, IRS1:2430, RAF1:2773, HNF1A:4090, HRAS:5714, JAK2:7161	0.739605
REACTOME_PHOSPHORYLATION_OF_CD3_AND_TCR_ZETA_CHAINS	-0.020305	0.778663	0.864	0.913402	16	HLA-DPA1:1245, CSK:3395, CD4:3879, CD3D:6653, CD3G:7032, HLA-DQA1:7036, CD3E:8590, HLA-DRB5:10163, CD247:11525, HLA-DQA2:11620	0.739605
REACTOME_CDT1_ASSOCIATION_WITH_THE_CDC6_ORC_ORIGIN_COMPLEX	-0.00942089	0.819844	0.864	0.926402	49	ORC2:387, GMNN:904, ORC3:974, PSMD4:1271, ORC6:2164, ORC1:2726, CDC6:3930, PSMF1:4357, ORC5:4762, MCM8:5075	0.739605
REACTOME_ORC1_REMOVAL_FROM_CHROMATIN	-0.00852116	0.819807	0.869	0.926402	60	ORC2:387, ORC3:974, PSMD4:1271, CDKN1A:1333, ORC6:2164, ORC1:2726, RB1:3246, CDC6:3930, PSMF1:4357, ORC5:4762	0.740558
REACTOME_CLASS_I_MHC_MEDIATED_ANTIGEN_PROCESSING_PRESENTATION	-0.00748368	0.707607	0.87	0.871216	215	ASB6:25, ASB9:126, UBA5:132, WSB1:252, RNF41:254, SPSB1:929, ANAPC5:973, SKP2:1027, UBE2Q2:1145, LRSAM1:1179	0.740558
REACTOME_SIGNALING_BY_NOTCH2	-0.0185911	0.823601	0.87	0.929409	12	DLL1:1532, NCSTN:5385, JAG2:6738, NOTCH2:7448, PSEN1:8292, APH1B:8881, JAG1:11359, PSEN2:11703, APH1A:11901, PSENEN:12534	0.740558
REACTOME_GPVI_MEDIATED_ACTIVATION_CASCADE	-0.0106664	0.842565	0.872	0.937977	29	PRKCZ:246, AKT3:541, VAV1:2038, AKT1:3757, FCER1G:3861, LAT:3980, LYN:4321, PLCG2:4370, RAC2:5594, PDPK1:5608	0.740558
BIOCARTA_NGF_PATHWAY	-0.0144999	0.831439	0.873	0.933081	18	SHC1:1107, ELK1:1165, SOS1:1341, RAF1:2773, HRAS:5714, FOS:7524, NGF:7640, MAPK8:7853, PIK3R1:9659, PIK3CA:11302	0.740558
REACTOME_SPHINGOLIPID_METABOLISM	-0.00943875	0.789839	0.874	0.917623	67	PPAP2A:143, VAPB:480, SGMS2:543, SUMF1:932, ARSK:963, STS:1274, NEU1:1475, ARSG:1965, GALC:2268, CERS2:3497	0.740558
REACTOME_COMMON_PATHWAY	-0.0202957	0.792689	0.874	0.917623	14	F5:1910, PROS1:3533, SERPINC1:3988, THBD:5033, F13B:7384, F10:8420, F2:8627, PF4V1:10337, FGG:12249, PROC:12546	0.740558
REACTOME_APC_C_CDH1_MEDIATED_DEGRADATION_OF_CDC20_AND_OTHER_APC_C_CDH1_TARGETED_PROTEINS_IN_LATE_MITOSIS_EARLY_G1	-0.010989	0.772687	0.875	0.910133	58	PTTG1:373, ANAPC5:973, SKP2:1027, PSMD4:1271, ANAPC7:1530, AURKA:2586, CDC26:3095, ANAPC2:4054, PSMF1:4357, PLK1:4662	0.740558
REACTOME_RNA_POL_III_CHAIN_ELONGATION	-0.0135391	0.856	0.878	0.943889	15	POLR3E:2290, POLR3H:2864, POLR2E:3039, POLR2F:6000, POLR3C:6233, POLR3B:6391, POLR1D:8796, POLR3GL:9513, POLR3F:10358, POLR3A:11289	0.742049
PID_P38_MKK3_6PATHWAY	-0.00875091	0.87736	0.881	0.951032	26	MAP3K4:9, TRAF2:896, TAOK2:991, TRAF6:1024, MAP3K1:2324, CCM2:3226, TXN:3953, CAMK2B:5637, ATM:5960, MAPK14:6244	0.74313
REACTOME_FRS2_MEDIATED_CASCADE	-0.00749792	0.876436	0.882	0.950837	36	KLB:116, FGFR2:391, SOS1:1341, FGF19:1808, FGF4:2513, RAF1:2773, FGF23:3521, KL:3712, FGF2:4349, FGFR3:4657	0.74313
REACTOME_TRAF6_MEDIATED_INDUCTION_OF_TAK1_COMPLEX	-0.0171992	0.850657	0.883	0.941978	10	TRAF6:1024, TLR4:3084, TLR3:3816, TICAM1:8012, CD14:8078, TAB1:11869, TAB2:12816, MAP3K7:15749, TAB3:15846, LY96:17253	0.74313
BIOCARTA_SPRY_PATHWAY	-0.0122262	0.857562	0.886	0.94421	18	EGF:919, SHC1:1107, SOS1:1341, SPRY1:1508, RAF1:2773, CBL:3597, HRAS:5714, SPRY3:10500, SRC:11165, EGFR:11512	0.744609
REACTOME_FORMATION_OF_RNA_POL_II_ELONGATION_COMPLEX_	-0.013383	0.793535	0.888	0.917772	32	POLR2G:384, SUPT5H:2764, SUPT16H:2961, POLR2E:3039, CCNT2:3592, NCBP1:5597, POLR2F:6000, POLR2D:6871, GTF2H3:6930, MNAT1:7230	0.745245
PID_THROMBIN_PAR1_PATHWAY	-0.00752867	0.867713	0.893	0.949306	41	AKAP13:20, GNAO1:426, TRPC6:1315, GNA11:3352, ARHGDIA:3466, PRKCD:3553, GNA14:3663, GNAQ:3886, GNA13:4443, SNX1:5167	0.747348
KEGG_MTOR_SIGNALING_PATHWAY	-0.00653756	0.871924	0.893	0.949712	51	TSC1:263, RPTOR:295, EIF4E2:404, AKT3:541, RPS6KB2:691, IGF1:1014, RPS6KA2:1092, TSC2:1156, PGF:2094, STK11:2605	0.747348
KEGG_ERBB_SIGNALING_PATHWAY	-0.00648718	0.834857	0.895	0.934675	87	NRG4:49, AKT3:541, ABL1:583, GAB1:646, RPS6KB2:691, EGF:919, SHC1:1107, ELK1:1165, CRK:1250, CDKN1A:1333	0.747977
BIOCARTA_PITX2_PATHWAY	-0.00980728	0.89542	0.898	0.960828	15	APC:1066, PITX2:2096, GSK3B:3505, TRRAP:8717, EP300:8785, MED1:8825, CREBBP:9218, AXIN1:9381, FZD1:11484, LEF1:11675	0.749439
REACTOME_POST_TRANSLATIONAL_MODIFICATION_SYNTHESIS_OF_GPI_ANCHORED_PROTEINS	-0.0101095	0.858507	0.903	0.94421	26	PIGM:631, PIGP:716, PIGN:2060, PGAP1:3635, PIGA:4160, PIGL:4533, PIGC:5099, PIGQ:6434, DPM2:7084, PIGS:8033	0.751715
PID_HDAC_CLASSI_PATHWAY	-0.00689995	0.850113	0.905	0.941978	63	XPO1:403, RELA:803, YY1:1339, NFKBIA:1497, HDAC7:1693, GATA1:2910, RANGAP1:3198, TNF:3304, KAT2B:3432, SIN3B:4325	0.751715
ST_GA12_PATHWAY	-0.00799092	0.894541	0.905	0.960692	23	VAV1:2038, PTK2:2115, RAF1:2773, BTK:3281, CFB:5556, F2RL1:6548, MAPK8:7853, F2:8627, F2RL2:8713, DLG4:9926	0.751715
REACTOME_SIGNALING_BY_PDGF	-0.00527621	0.846355	0.907	0.940557	114	ADCY7:169, CAMK4:489, AKT3:541, STAT6:592, RPS6KB2:691, PDGFA:706, RAPGEF1:848, PDGFD:886, TSC2:1156, CRK:1250	0.751715
BIOCARTA_SHH_PATHWAY	-0.00888453	0.90521	0.907	0.965237	15	PTCH1:1621, GSK3B:3505, SMO:4306, GLI3:5202, GLI2:7259, SHH:7295, DYRK1A:7478, GLI1:7643, PRKAR2A:10302, SUFU:12410	0.751715
REACTOME_SIGNALING_BY_FGFR	-0.00492843	0.864614	0.909	0.947664	101	KLB:116, ADCY7:169, FGFR2:391, CAMK4:489, AKT3:541, GAB1:646, RPS6KB2:691, SHC1:1107, TSC2:1156, CDKN1A:1333	0.75191
REACTOME_VEGF_LIGAND_RECEPTOR_INTERACTIONS	-0.0151426	0.86834	0.911	0.949306	10	FLT4:2781, FIGF:5364, FLT1:5571, VEGFA:6541, KDR:7954, NRP1:10649, PDGFC:11171, VEGFC:14640, VEGFB:16592, NRP2:17351	0.75191
BIOCARTA_ACH_PATHWAY	-0.00751868	0.917111	0.911	0.969338	16	FASLG:557, CHRNG:1538, PTK2:2115, TERT:3390, AKT1:3757, CHRNB1:5039, PIK3R1:9659, SRC:11165, PTK2B:11282, PIK3CA:11302	0.75191
BIOCARTA_BAD_PATHWAY	-0.00825669	0.888734	0.913	0.958483	24	IGF1R:94, IGF1:1014, KITLG:2069, AKT1:3757, KIT:5213, BCL2:5991, CSF2RB:6035, BCL2L1:6875, BAX:7101, IL3:8283	0.752524
REACTOME_SMAD2_SMAD3_SMAD4_HETEROTRIMER_REGULATES_TRANSCRIPTION	-0.00768173	0.898599	0.917	0.963431	23	WWTR1:4, CDKN2B:1414, E2F5:1683, TGIF1:2904, CCNT2:3592, E2F4:4063, SMAD7:5532, SP1:6637, TFDP1:7973, SERPINE1:9338	0.75457
REACTOME_REGULATION_OF_SIGNALING_BY_CBL	-0.00701167	0.918018	0.918	0.969338	18	RAPGEF1:848, CRK:1250, VAV1:2038, CBL:3597, LYN:4321, YES1:5696, BLNK:9309, PIK3R1:9659, PIK3CA:11302, CRKL:12185	0.75457
KEGG_SPHINGOLIPID_METABOLISM	-0.00621496	0.893307	0.922	0.960173	39	PPAP2A:143, SGMS2:543, NEU1:1475, GALC:2268, UGT8:2568, NEU2:4274, B4GALT6:4553, GLB1:4602, ACER2:4693, ARSA:5275	0.75596
BIOCARTA_NTHI_PATHWAY	-0.00739832	0.900237	0.924	0.96357	24	RELA:803, NFKBIA:1497, TNF:3304, CHUK:4461, TLR2:4800, TGFBR2:5168, MAPK14:6244, MYD88:7883, NFKB1:8261, MAP3K14:8724	0.75596
REACTOME_SIGNALING_BY_THE_B_CELL_RECEPTOR_BCR	-0.00427336	0.876366	0.925	0.950837	112	IKBKG:160, AKT3:541, RPS6KB2:691, RELA:803, SHC1:1107, TSC2:1156, PSMD4:1271, CDKN1A:1333, SOS1:1341, NFKBIA:1497	0.75596
PID_AMB2_NEUTROPHILS_PATHWAY	-0.00529201	0.909077	0.926	0.965237	39	PRKCZ:246, APOB:2275, SELP:3213, TNF:3304, THY1:3632, AKT1:3757, LYN:4321, IL6:5246, YES1:5696, AGER:6149	0.75596
KEGG_ENDOCYTOSIS	-0.00254059	0.909341	0.926	0.965237	171	PARD6B:40, LDLR:78, IGF1R:94, PRKCZ:246, RNF41:254, FGFR2:391, ARFGAP3:826, EGF:919, AGAP1:1003, TRAF6:1024	0.75596
PID_MYC_REPRESS_PATHWAY	-0.00370031	0.919278	0.928	0.969338	63	ZFP36L1:1037, TSC2:1156, CDKN1A:1333, CFLAR:1412, CDKN2B:1414, IRF8:1651, ID2:1705, CCND1:1723, CEBPD:3875, PDGFRB:4064	0.756562
REACTOME_EICOSANOID_LIGAND_BINDING_RECEPTORS	-0.00783833	0.919151	0.934	0.969338	14	PTGDR:2917, OXER1:4455, GPR17:5891, CYSLTR1:8182, PTGER4:9038, LTB4R2:9210, PTGER3:10245, PTGIR:11777, PTGER1:12038, PTGER2:12288	0.76014
BIOCARTA_EPHA4_PATHWAY	-0.00794467	0.930695	0.935	0.974142	10	SELP:3213, L1CAM:3755, LYN:4321, ACTA1:8492, ITGA1:9749, ITGB1:10853, EPHB1:12526, RAP1B:14748, FYN:15154, EPHA4:17289	0.76014
PID_ERB_GENOMIC_PATHWAY	-0.00642831	0.938561	0.938	0.979968	12	NR0B1:871, C3:2266, NR0B2:4791, NCOA3:7925, ESR2:8064, SMARCE1:10130, SMARCB1:10132, NCOA1:12260, UBA3:12643, DDX54:14643	0.76014
REACTOME_METABOLISM_OF_PORPHYRINS	-0.00535052	0.946764	0.939	0.982638	13	UROS:696, FECH:2464, HMOX2:3267, ALAS1:6113, PPOX:8065, ALAS2:8711, ALAD:10529, BLVRA:11425, HMBS:13510, HMOX1:13979	0.76014
KEGG_AMINOACYL_TRNA_BIOSYNTHESIS	-0.00620995	0.890723	0.94	0.959818	41	TARSL2:357, PSTK:368, NARS2:2007, YARS2:2901, RARS2:3378, SEPSECS:4095, HARS2:4659, LARS2:5023, DARS2:6057, TARS2:6850	0.76014
PID_LPA4_PATHWAY	-0.0066879	0.928573	0.94	0.973296	15	ADCY7:169, RPS6KA5:559, PRKCE:2178, ADCY9:5449, ADCY6:7633, PRKACA:8039, ADCY3:10528, ADCY5:10806, ADCY4:12075, ADCY1:12536	0.76014
KEGG_GLYCOSAMINOGLYCAN_BIOSYNTHESIS_KERATAN_SULFATE	-0.00733301	0.921705	0.945	0.969844	15	CHST4:1313, ST3GAL1:4862, B3GNT2:5147, B4GALT1:7442, B4GALT4:7542, CHST2:7929, ST3GAL2:9723, B3GNT7:10443, CHST6:11123, ST3GAL3:11476	0.763154
BIOCARTA_CARM_ER_PATHWAY	-0.00424656	0.93179	0.949	0.974491	34	NR0B1:871, HDAC7:1693, CCND1:1723, GTF2E1:4914, SPEN:4922, HDAC6:5665, HDAC10:6887, BRCA1:7085, GTF2A1:7256, ERCC3:7411	0.765353
PID_SMAD2_3NUCLEAR_PATHWAY	-0.00303124	0.925543	0.951	0.971137	80	CDK4:198, PIAS3:616, CDKN1A:1333, CDKN2B:1414, E2F5:1683, TGIF1:2904, IRF7:2924, IL5:3174, KAT2B:3432, SNIP1:3738	0.765711
PID_TGFBR_PATHWAY	-0.00463081	0.908206	0.952	0.965237	52	YAP1:270, PPP1R15A:865, SHC1:1107, SOS1:1341, DAXX:1521, FKBP1A:1533, NEDD4L:1921, PML:3726, STRAP:3943, TGFBR2:5168	0.765711
REACTOME_PROLONGED_ERK_ACTIVATION_EVENTS	-0.0046631	0.945425	0.956	0.982319	18	RAPGEF1:848, CRK:1250, RAF1:2773, HRAS:5714, KIDINS220:5990, CDK1:7046, NGF:7640, NRAS:7867, NTRK1:8858, BRAF:9294	0.765928
PID_HDAC_CLASSII_PATHWAY	-0.00225664	0.965351	0.957	0.98873	31	XPO1:403, CAMK4:489, HDAC7:1693, TUBA1B:2682, GATA1:2910, RANGAP1:3198, BCOR:4409, HSP90AA1:4929, HDAC6:5665, HDAC10:6887	0.765928
PID_FRA_PATHWAY	-0.00252943	0.957593	0.958	0.988074	37	NFATC2:38, NFATC1:911, CCL2:1226, CDKN2A:1545, CCND1:1723, BGLAP:3125, THBD:5033, IL6:5246, CCNA2:5874, DCN:6012	0.765928
REACTOME_SIGNALING_BY_EGFR_IN_CANCER	-0.00194276	0.948008	0.961	0.982638	95	ADCY7:169, ADAM12:185, CAMK4:489, AKT3:541, GAB1:646, RPS6KB2:691, EGF:919, LRIG1:956, SHC1:1107, TSC2:1156	0.765928
KEGG_VALINE_LEUCINE_AND_ISOLEUCINE_BIOSYNTHESIS	-0.0047636	0.956386	0.961	0.988074	11	BCAT1:1858, PDHA1:2774, LARS2:5023, VARS2:7594, IARS2:8809, BCAT2:9407, PDHA2:12122, LARS:13922, PDHB:13963, IARS:16822	0.765928
PID_BETA_CATENIN_DEG_PATHWAY	-0.00345936	0.960636	0.964	0.988481	17	APC:1066, DVL2:1344, AXIN2:2540, GSK3B:3505, CSNK1A1:5163, CUL1:5190, WNT3A:7827, AXIN1:9381, GSK3A:10839, SSPO:11078	0.765928
PID_PI3K_PLC_TRK_PATHWAY	-0.00234002	0.961835	0.966	0.98873	35	CAMK4:489, GAB1:646, SHC1:1107, SOS1:1341, CCND1:1723, YWHAZ:3080, GSK3B:3505, PRKCD:3553, AKT1:3757, PDPK1:5608	0.765928
BIOCARTA_STATHMIN_PATHWAY	-0.00320631	0.962459	0.966	0.98873	18	CAMK4:489, CCNB1:1522, CD2:4787, CAMK2B:5637, CAMK2D:6343, CD3D:6653, CD3G:7032, CDK1:7046, CD3E:8590, PRKAR2A:10302	0.765928
BIOCARTA_GLEEVEC_PATHWAY	-0.00200972	0.973404	0.966	0.989666	23	SOS1:1341, MAP3K1:2324, RAF1:2773, AKT1:3757, HRAS:5714, JAK2:7161, FOS:7524, MAPK8:7853, STAT5B:9321, PIK3R1:9659	0.765928
KEGG_NON_HOMOLOGOUS_END_JOINING	-0.00556717	0.944612	0.967	0.982319	13	NHEJ1:2383, RAD50:4515, POLM:4583, XRCC4:4630, DNTT:7286, DCLRE1C:8970, PRKDC:10343, XRCC6:13020, POLL:14192, XRCC5:14336	0.765928
REACTOME_RECYCLING_PATHWAY_OF_L1	-0.0021963	0.970936	0.968	0.98873	23	RPS6KA5:559, RPS6KA2:1092, AP2A2:1712, KIAA1598:2118, RPS6KA6:3580, L1CAM:3755, RDX:5563, SH3GL2:7185, KIF4A:8439, NUMB:9025	0.765928
REACTOME_THE_NLRP3_INFLAMMASOME	-0.00400677	0.96331	0.97	0.98873	11	MEFV:1953, TXN:3953, CASP1:4077, PYCARD:8133, PSTPIP1:10470, P2RX7:11072, PANX1:11706, NLRP3:13108, TXNIP:14297, APP:15715	0.765928
SIG_INSULIN_RECEPTOR_PATHWAY_IN_CARDIAC_MYOCYTES	-0.00272363	0.948038	0.971	0.982638	48	AKT3:541, RPS6KA2:1092, SHC1:1107, CYTH3:1239, SOS1:1341, CDKN2A:1545, LNPEP:2426, IRS1:2430, IRS4:2502, RAF1:2773	0.765928
REACTOME_SIGNALING_BY_FGFR_IN_DISEASE	-0.0016423	0.951698	0.972	0.985596	115	KLB:116, ADCY7:169, FGFR2:391, CAMK4:489, AKT3:541, GAB1:646, RPS6KB2:691, FGFR1OP:737, SHC1:1107, TSC2:1156	0.765928
PID_ERBB1_DOWNSTREAM_PATHWAY	-0.00112383	0.969444	0.972	0.98873	98	VAV2:222, PRKCZ:246, RPS6KA5:559, GAB1:646, WASL:794, EGF:919, ELK1:1165, SOS1:1341, WASF2:1821, MAP3K1:2324	0.765928
PID_WNT_SIGNALING_PATHWAY	-0.0028305	0.958694	0.973	0.988074	28	LRP5:675, WNT7A:1923, ROR2:2362, FZD10:2421, WNT7B:3643, ATP6AP2:3666, WNT2:4103, KREMEN2:5633, CTHRC1:5712, FZD6:6775	0.765928
BIOCARTA_TOB1_PATHWAY	-0.0021939	0.972922	0.974	0.989666	20	CD28:342, IFNG:4722, TOB2:4723, TGFBR2:5168, CD3D:6653, CD3G:7032, IL2:8194, CD3E:8590, TGFB2:9493, TGFB3:9669	0.765928
SA_PROGRAMMED_CELL_DEATH	-0.00310191	0.970331	0.976	0.98873	12	CASP8AP2:550, BCL2:5991, BCL2L1:6875, BAX:7101, CASP9:7210, BAK1:9844, BCL10:10767, CES1:12268, BID:13533, BCL2L11:14975	0.766495
BIOCARTA_ACTINY_PATHWAY	-0.00177674	0.979192	0.979	0.993969	18	WASL:794, WASF2:1821, PIR:3421, ARPC3:6070, RAC1:6451, PSMA7:8367, NCKAP1:8390, ACTA1:8492, NTRK1:8858, ARPC5:9858	0.767185
REACTOME_ACTIVATION_OF_THE_MRNA_UPON_BINDING_OF_THE_CAP_BINDING_COMPLEX_AND_EIFS_AND_SUBSEQUENT_BINDING_TO_43S	-0.00108878	0.981739	0.98	0.994974	37	RPS3:412, EIF3K:788, RPSA:872, EIF3H:887, EIF3J:1559, RPS24:3358, RPS3A:3384, RPS6:3438, EIF3C:4110, RPS8:5946	0.767185
KEGG_ECM_RECEPTOR_INTERACTION	-0.00125304	0.968618	0.982	0.98873	83	SV2B:280, COL4A6:343, FN1:392, GP5:528, ITGB7:808, HMMR:1228, LAMA4:1476, LAMA5:2424, ITGAV:2736, ITGA10:3169	0.767185
ST_G_ALPHA_S_PATHWAY	-0.00155427	0.982835	0.982	0.995296	16	RAF1:2773, SNX13:3391, GAST:5332, CFB:5556, RASGRF2:8436, RAPGEF3:9047, BRAF:9294, BFAR:9468, CREB5:9908, CREB3:10430	0.767185
PID_INTEGRIN_CS_PATHWAY	-0.00222193	0.968745	0.984	0.98873	26	ITGB7:808, ITGAE:1657, ITGAV:2736, ITGA10:3169, ITGAD:3446, ITGA2:4252, ITGA3:6194, ITGB5:8185, ITGB8:9069, ITGAL:9226	0.767747
REACTOME_CD28_CO_STIMULATION	-0.00130895	0.980224	0.987	0.994227	30	CD28:342, AKT3:541, CD80:2028, VAV1:2038, CD86:2837, AKT1:3757, PAK2:4175, LYN:4321, PDPK1:5608, YES1:5696	0.768866
KEGG_PROTEIN_EXPORT	-0.00120365	0.984419	0.988	0.995703	22	OXA1L:1629, SRP9:2905, SEC61A2:3496, SEC63:3959, SRP72:6827, HSPA5:7031, SRP14:7502, SEC11A:7999, SPCS1:8833, IMMP2L:9484	0.768866
REACTOME_POST_NMDA_RECEPTOR_ACTIVATION_EVENTS	-0.000948992	0.985661	0.995	0.995791	30	CAMK4:489, RPS6KA2:1092, RAF1:2773, RPS6KA6:3580, AKAP9:4367, RASGRF1:4833, PDPK1:5608, CAMK2B:5637, HRAS:5714, CAMK2D:6343	0.76987
KEGG_GAP_JUNCTION	-0.000262783	0.993262	0.995	0.998277	87	ADCY7:169, ITPR1:306, PDGFA:706, PDGFD:886, EGF:919, TUBB4B:1203, SOS1:1341, GNAS:2077, TUBA1B:2682, RAF1:2773	0.76987
REACTOME_TRANSLOCATION_OF_ZAP_70_TO_IMMUNOLOGICAL_SYNAPSE	-0.000629866	0.993492	0.996	0.998277	14	HLA-DPA1:1245, CD4:3879, CD3D:6653, CD3G:7032, HLA-DQA1:7036, CD3E:8590, HLA-DRB5:10163, CD247:11525, HLA-DQA2:11620, HLA-DRB1:12390	0.76987
REACTOME_VITAMIN_B5_PANTOTHENATE_METABOLISM	-0.000478586	0.995616	0.996	0.998277	11	PPCDC:4089, SLC5A6:6870, PANK2:7765, PANK3:8690, PANK4:9361, PPCS:10003, PANK1:10516, COASY:12551, FASN:13074, SLC25A16:13197	0.76987
KEGG_MAPK_SIGNALING_PATHWAY	-0.000120864	0.99472	0.997	0.998277	258	MAP3K4:9, NFATC2:38, IKBKG:160, CDC25B:250, DUSP9:307, FGFR2:391, NTF4:463, MAPT:505, AKT3:541, FASLG:557	0.76987
REACTOME_SEMA3A_PLEXIN_REPULSION_SIGNALING_BY_INHIBITING_INTEGRIN_ADHESION	-0.000367377	0.996342	0.997	0.998277	13	PIP5K1C:1444, SEMA3A:3796, FES:4941, RAC1:6451, FARP2:7446, RRAS:10648, NRP1:10649, PLXNA2:11972, PLXNA3:12986, TLN1:14732	0.76987
REACTOME_MRNA_3_END_PROCESSING	-0.000149929	0.99785	0.999	0.998277	27	CPSF2:192, CPSF1:1204, CSTF2:1300, SRRM1:1730, UPF3B:2520, NCBP1:5597, DHX38:5639, CPSF7:6087, CDC40:6533, PAPOLA:7069	0.770422

## Sheet: 3L (PC1) Positive Correlations
	stat	pval	simpermPval	p.adj	# of genes	top ten genes and rank	qval
REACTOME_OLFACTORY_SIGNALING_PATHWAY	0.238664	6.21937e-47	0.001	7.94835e-44	315	OR10A4:1, OR10P1:12, OR51G1:14, OR51Q1:15, OR51I2:38, OR51A2:58, OR51G2:60, OR52E6:61, OR8D4:70, OR51E1:78	0.501
REACTOME_GLUTAMATE_NEUROTRANSMITTER_RELEASE_CYCLE	0.233952	0.00244897	0.002	0.0284191	14	STX1A:30, SLC1A1:185, UNC13B:216, SYT1:1182, RIMS1:1484, GLS2:1730, VAMP2:2195, GLS:3279, SLC17A7:3381, SLC1A6:4085	0.501
KEGG_OLFACTORY_TRANSDUCTION	0.216506	1.44773e-45	0.004	9.25103e-43	374	OR10A4:1, OR10P1:12, OR51G1:14, OR51Q1:15, OR51I2:38, OR51A2:58, OR51G2:60, OR52E6:61, OR8D4:70, OR51E1:78	0.668
REACTOME_NEUROTRANSMITTER_RELEASE_CYCLE	0.170867	0.000690995	0.006	0.0120852	33	STX1A:30, SLC1A1:185, UNC13B:216, SLC18A3:466, SYT1:1182, GAD1:1477, RIMS1:1484, GAD2:1523, SLC6A12:1616, GLS2:1730	0.679929
REACTOME_CLASS_C_3_METABOTROPIC_GLUTAMATE_PHEROMONE_RECEPTORS	0.252848	0.00105935	0.009	0.0161172	14	GRM1:534, GRM6:628, TAS1R2:640, GRM3:745, GRM8:800, CASR:806, GRM2:2158, TAS1R1:4340, TAS1R3:6291, GRM4:6358	0.679929
REACTOME_ACTIVATED_AMPK_STIMULATES_FATTY_ACID_OXIDATION_IN_MUSCLE	0.220827	0.00118817	0.01	0.0176328	18	PRKAA2:95, PRKAB1:115, STRADB:706, SLC25A20:1338, CAB39L:1620, CPT2:1806, PRKAG3:1934, ACACB:1985, PRKAA1:2006, PRKAG1:2253	0.679929
REACTOME_BIOLOGICAL_OXIDATIONS	0.149602	6.8578e-09	0.012	1.09553e-06	127	FMO3:170, ADH7:200, CYP2B6:273, MAT2B:380, CYP4F3:393, GSTA5:429, GSTM4:565, PTGS1:569, GGT7:597, CYP4B1:709	0.679929
KEGG_FATTY_ACID_METABOLISM	0.214953	1.48697e-06	0.016	8.26236e-05	42	ALDH1B1:105, ADH7:200, ALDH3A2:478, ACAA2:595, ADH1C:734, HADHB:829, ACADM:1717, ECHS1:1723, CPT2:1806, CYP4A22:1935	0.679929
KEGG_VALINE_LEUCINE_AND_ISOLEUCINE_DEGRADATION	0.219445	4.94166e-07	0.018	3.32392e-05	44	ALDH1B1:105, ALDH6A1:279, MUT:282, IVD:443, ALDH3A2:478, ACAA2:595, DLD:609, HADHB:829, HMGCL:1160, MCCC1:1176	0.679929
KEGG_PROPANOATE_METABOLISM	0.223336	1.71481e-05	0.019	0.000644567	31	ALDH1B1:105, ACSS3:129, ALDH6A1:279, MUT:282, ALDH3A2:478, ACSS2:903, ACACA:1075, SUCLG1:1241, ACADM:1717, ECHS1:1723	0.679929
BIOCARTA_ETC_PATHWAY	0.235186	0.00693187	0.019	0.0560428	11	GPD2:2031, ATP5A1:2086, SLC25A6:2105, SDHB:2284, SDHA:3150, NDUFA1:3498, SDHD:3989, SDHC:6160, SLC25A4:6824, CYCS:6828	0.679929
REACTOME_CYTOSOLIC_SULFONATION_OF_SMALL_MOLECULES	0.254597	0.000977481	0.02	0.0154225	14	PAPSS2:724, SULT1E1:728, SULT1C2:1194, SULT1A2:2059, SULT1A4:2134, PAPSS1:2348, SULT1C4:2939, SULT1A1:3445, SULT1A3:4351, SULT1B1:4772	0.679929
REACTOME_PHASE_II_CONJUGATION	0.153294	3.11107e-05	0.022	0.00107458	62	MAT2B:380, GSTA5:429, GSTM4:565, GGT7:597, PAPSS2:724, SULT1E1:728, GGCT:927, SLC35D1:1174, SULT1C2:1194, COMT:1260	0.679929
REACTOME_PHASE1_FUNCTIONALIZATION_OF_COMPOUNDS	0.146402	4.07469e-05	0.022	0.00136828	66	FMO3:170, ADH7:200, CYP2B6:273, CYP4F3:393, PTGS1:569, CYP4B1:709, ADH1C:734, CYP2R1:770, CYP3A4:773, ACSS2:903	0.679929
REACTOME_BRANCHED_CHAIN_AMINO_ACID_CATABOLISM	0.231748	0.000945086	0.023	0.0152889	17	ALDH6A1:279, IVD:443, DLD:609, MCCC1:1176, ACAT1:1957, BCKDHA:2667, ACADSB:2776, ACAD8:3182, HIBADH:4194, DBT:4278	0.679929
KEGG_GLYCOLYSIS_GLUCONEOGENESIS	0.150756	6.42567e-05	0.024	0.00182489	59	PFKM:48, ALDH1B1:105, ADH7:200, PGM1:361, ALDH3A2:478, DLD:609, ALDH3A1:620, ADH1C:734, ACSS2:903, GCK:914	0.679929
REACTOME_ENDOSOMAL_SORTING_COMPLEX_REQUIRED_FOR_TRANSPORT_ESCRT	0.161735	0.00868563	0.025	0.0630854	22	STAM:168, CHMP4B:222, VPS37A:742, VPS25:1083, VPS37C:1111, VPS4B:1390, CHMP5:1907, CHMP7:2170, CHMP4C:3287, VPS4A:5258	0.679929
REACTOME_GABA_SYNTHESIS_RELEASE_REUPTAKE_AND_DEGRADATION	0.183978	0.0108771	0.026	0.0727795	16	STX1A:30, SYT1:1182, GAD1:1477, RIMS1:1484, GAD2:1523, SLC6A12:1616, VAMP2:2195, SLC32A1:3076, SLC6A11:4068, ALDH5A1:6480	0.679929
KEGG_BETA_ALANINE_METABOLISM	0.203372	0.000967667	0.029	0.0154225	22	ALDH1B1:105, ALDH3A2:478, GAD1:1477, GAD2:1523, ACADM:1717, ECHS1:1723, MLYCD:3042, AOC3:3316, DPYD:3564, SRM:3636	0.679929
BIOCARTA_DREAM_PATHWAY	0.225777	0.00483938	0.029	0.0441766	13	CREB1:182, CREM:718, PRKAR2B:2282, PRKAR1B:2608, PRKAR1A:3408, PRKACB:3730, MAPK3:4496, KCNIP3:4657, POLR2A:4880, OPRK1:5823	0.679929
REACTOME_GLUCOSE_METABOLISM	0.150536	7.58795e-05	0.031	0.00202029	58	SLC25A11:3, PFKM:48, PYGM:93, GYS2:326, PGM1:361, SLC25A12:637, SLC25A1:907, PC:987, ENO3:988, ALDOC:1015	0.679929
REACTOME_METABOLISM_OF_NUCLEOTIDES	0.122282	0.000554669	0.034	0.0105654	67	AK5:9, AMPD3:62, ADSS:99, ADK:208, XDH:487, UMPS:568, GMPS:811, HPRT1:1034, CMPK1:1055, ADSL:1345	0.679929
KEGG_STARCH_AND_SUCROSE_METABOLISM	0.142881	0.00137801	0.034	0.0191423	42	PYGM:93, GYS2:326, PGM1:361, AMY2A:662, AMY2B:794, GCK:914, PYGL:1149, GBA3:1700, ENPP1:1727, UGT2A3:1735	0.679929
KEGG_ARGININE_AND_PROLINE_METABOLISM	0.10848	0.00639674	0.035	0.0527421	53	CKM:13, ALDH1B1:105, GATM:290, ALDH3A2:478, AMD1:596, ASS1:1041, ACY1:1409, GOT2:1437, GLS2:1730, CKMT1B:1891	0.679929
KEGG_METABOLISM_OF_XENOBIOTICS_BY_CYTOCHROME_P450	0.169043	1.05619e-05	0.036	0.000421814	57	ADH7:200, CYP2B6:273, GSTA5:429, GSTM4:565, ALDH3A1:620, GSTT2:674, ADH1C:734, CYP3A4:773, UGT2A3:1735, CYP2S1:1899	0.679929
REACTOME_TRAFFICKING_OF_GLUR2_CONTAINING_AMPA_RECEPTORS	0.206343	0.0100234	0.036	0.0692426	13	AP2B1:969, AP2A1:1046, GRIA4:1486, GRIA2:1682, PRKCG:1773, GRIP2:2130, PRKCB:2273, GRIA1:3386, PRKCA:5812, PICK1:6028	0.679929
REACTOME_CYTOSOLIC_TRNA_AMINOACYLATION	0.168113	0.00439117	0.037	0.0409629	24	WARS:860, VARS:964, AIMP1:1161, IARS:2119, YARS:2321, QARS:2636, PPA1:2637, AARS:2993, DARS:4026, EPRS:4462	0.679929
REACTOME_PURINE_METABOLISM	0.164758	0.00127272	0.038	0.0180579	32	AMPD3:62, ADSS:99, ADK:208, XDH:487, GMPS:811, HPRT1:1034, ADSL:1345, GMPR:1636, DGUOK:2499, DCK:2719	0.679929
KEGG_DRUG_METABOLISM_CYTOCHROME_P450	0.17093	4.89102e-06	0.044	0.00022324	60	FMO3:170, ADH7:200, CYP2B6:273, GSTA5:429, GSTM4:565, ALDH3A1:620, GSTT2:674, ADH1C:734, CYP3A4:773, UGT2A3:1735	0.745933
REACTOME_TRANSPORT_OF_VITAMINS_NUCLEOSIDES_AND_RELATED_MOLECULES	0.114427	0.0276176	0.05	0.141578	31	SLC27A1:22, SLC28A3:301, SLCO4C1:1051, ALB:1153, SLC35D1:1174, SLC33A1:1354, SLC28A1:1637, SLCO1B1:2487, SLC28A2:2668, SLC29A2:3034	0.745933
REACTOME_FATTY_ACID_TRIACYLGLYCEROL_AND_KETONE_BODY_METABOLISM	0.0732454	0.00121415	0.052	0.0176328	166	ABCB4:18, SLC27A1:22, TEAD2:63, PRKAA2:95, LPIN3:164, MUT:282, LPCAT4:306, NCOA2:386, AGPAT9:490, HADHB:829	0.745933
KEGG_PYRUVATE_METABOLISM	0.136185	0.0037176	0.056	0.0362678	38	ALDH1B1:105, ALDH3A2:478, DLD:609, ACSS2:903, PC:987, ACACA:1075, PKLR:1937, ACAT1:1957, ACACB:1985, LDHAL6A:2144	0.745933
KEGG_PPAR_SIGNALING_PATHWAY	0.107497	0.00207036	0.059	0.0251993	69	SLC27A1:22, FABP4:83, SLC27A2:250, FABP2:441, LPL:510, SLC27A5:862, RXRB:959, FABP6:1043, FABP1:1352, ACADM:1717	0.745933
REACTOME_DARPP_32_EVENTS	0.169819	0.01267	0.059	0.079374	18	PPP3CB:816, PPP2CB:2262, PRKAR2B:2282, PPP2R5D:2596, PRKAR1B:2608, PPP1CA:2620, PDE4B:2757, PRKAR1A:3408, PRKACB:3730, PDE4D:5535	0.745933
REACTOME_GLUCONEOGENESIS	0.15415	0.00350887	0.06	0.0350338	30	SLC25A11:3, SLC25A12:637, SLC25A1:907, PC:987, ENO3:988, ALDOC:1015, GOT2:1437, TPI1:1989, ALDOA:2192, SLC25A13:2204	0.745933
KEGG_LINOLEIC_ACID_METABOLISM	0.137817	0.0171599	0.061	0.100138	25	CYP3A4:773, PLA2G2E:909, PLA2G12A:925, AKR1B10:2990, CYP1A2:3032, PLA2G5:3603, CYP2C19:3847, PLA2G6:4200, PLA2G2A:4523, CYP2J2:5063	0.745933
BIOCARTA_CHREBP2_PATHWAY	0.109562	0.0195942	0.062	0.109351	38	PRKAA2:95, PRKAB1:115, GCK:914, ACACA:1075, PPP2R5B:1858, PRKAG3:1934, PKLR:1937, PRKAA1:2006, PRKAG1:2253, PPP2CB:2262	0.745933
REACTOME_CYTOCHROME_P450_ARRANGED_BY_SUBSTRATE_TYPE	0.134075	0.00149966	0.063	0.0195568	47	CYP2B6:273, CYP4F3:393, CYP4B1:709, CYP2R1:770, CYP3A4:773, CYP4F2:1872, CYP2S1:1899, CYP11A1:1991, CYP27B1:2171, CYP26B1:2260	0.745933
REACTOME_MITOCHONDRIAL_FATTY_ACID_BETA_OXIDATION	0.249926	0.00121033	0.064	0.0176328	14	MUT:282, HADHB:829, ACADM:1717, ECHS1:1723, PCCB:1745, DECR1:2801, ECI1:3523, PCCA:5307, MCEE:5539, ACADL:6574	0.745933
REACTOME_METABOLISM_OF_AMINO_ACIDS_AND_DERIVATIVES	0.0676988	0.00128581	0.064	0.0180579	193	CKM:13, PHGDH:258, ALDH6A1:279, GATM:290, MAT2B:380, IVD:443, QDPR:500, DLST:592, AMD1:596, DLD:609	0.745933
REACTOME_TRANSPORT_OF_INORGANIC_CATIONS_ANIONS_AND_AMINO_ACIDS_OLIGOPEPTIDES	0.0939901	0.00190178	0.065	0.0235968	92	SLC4A1:19, SLC12A1:106, SLC1A1:185, SLC34A1:391, SLC4A3:694, SLC4A8:1100, SLC4A9:1108, SLC6A20:1151, SLC5A8:1253, SLC24A4:1262	0.745933
REACTOME_GLYCOLYSIS	0.160741	0.0054412	0.065	0.0473051	25	PFKM:48, ENO3:988, ALDOC:1015, PKLR:1937, TPI1:1989, ALDOA:2192, PPP2CB:2262, PPP2R5D:2596, PGK1:2842, PFKFB3:3423	0.745933
REACTOME_GLUTATHIONE_CONJUGATION	0.154829	0.010216	0.065	0.0698185	23	GSTA5:429, GSTM4:565, GGT7:597, GGCT:927, MGST1:2065, GSTO1:2466, MGST3:2799, GSTA3:2956, GCLM:3036, GSTA2:3424	0.745933
REACTOME_SYNTHESIS_OF_BILE_ACIDS_AND_BILE_SALTS_VIA_7ALPHA_HYDROXYCHOLESTEROL	0.219239	0.00329782	0.066	0.0343247	15	SLC27A2:250, HSD17B4:276, ABCB11:782, SLC27A5:862, ACOX2:3315, CYP7A1:3718, SCP2:4120, AMACR:4413, CYP27A1:4638, ACOT8:5107	0.745933
REACTOME_SYNTHESIS_OF_PA	0.119789	0.0313576	0.067	0.155329	27	LPCAT4:306, AGPAT9:490, PLD2:796, PLA2G2E:909, PLA2G12A:925, GPD1:1505, PLD1:1764, GPD1L:2176, AGPAT1:2612, PLA2G5:3603	0.745933
REACTOME_FORMATION_OF_ATP_BY_CHEMIOSMOTIC_COUPLING	0.219816	0.0116148	0.071	0.0762196	11	ATP5B:143, ATP5A1:2086, ATP5C1:2585, ATP5D:3351, ATP5H:3751, ATP5J:4377, ATP5F1:4572, ATP5E:5517, ATP5G1:5959, ATP5L:7231	0.76152
REACTOME_BILE_ACID_AND_BILE_SALT_METABOLISM	0.195594	0.000440318	0.074	0.00879261	27	SLC27A2:250, HSD17B4:276, SLC10A2:401, ABCB11:782, SLC27A5:862, FABP6:1043, ALB:1153, SLCO1B1:2487, CYP46A1:2869, ACOX2:3315	0.76152
KEGG_ALANINE_ASPARTATE_AND_GLUTAMATE_METABOLISM	0.14205	0.00624965	0.075	0.0518639	31	ADSS:99, ACY3:514, ASS1:1041, ADSL:1345, GOT2:1437, GAD1:1477, GAD2:1523, NIT2:1604, GLS2:1730, CPS1:2877	0.76152
REACTOME_INSULIN_SYNTHESIS_AND_PROCESSING	0.126966	0.0623445	0.075	0.245158	18	STX1A:30, MYO5A:192, KIF5B:771, ERO1L:1642, VAMP2:2195, PCSK2:4000, EXOC3:4027, RAB27A:4113, EXOC6:4678, SLC30A7:6502	0.76152
REACTOME_ETHANOL_OXIDATION	0.201175	0.0276454	0.076	0.141578	10	ADH7:200, ADH1C:734, ACSS2:903, ALDH1A1:3320, ADH1A:5621, ALDH2:6085, ADH4:6557, ADH6:7915, ACSS1:9136, ADH1B:10121	0.76152
BIOCARTA_CK1_PATHWAY	0.176874	0.0177548	0.079	0.103139	15	GRM1:534, CSNK1D:1785, PRKAR2B:2282, PRKAR1B:2608, PPP1CA:2620, CDK5R1:3280, PRKAR1A:3408, PRKACB:3730, DRD1:4909, PPP3CA:5651	0.776059
BIOCARTA_NOS1_PATHWAY	0.168723	0.0160756	0.085	0.0960029	17	PPP3CB:816, PRKCB:2273, PRKAR2B:2282, GRIN2B:2308, PRKAR1B:2608, GRIN2C:2618, GRIN1:2797, PRKAR1A:3408, PRKACB:3730, PPP3CA:5651	0.782263
REACTOME_PEROXISOMAL_LIPID_METABOLISM	0.190685	0.00317479	0.086	0.0335321	20	SLC27A2:250, HSD17B4:276, SLC25A17:366, PHYH:1335, AGPS:1705, ACAA1:2295, CROT:2828, ACOX2:3315, IDH1:3970, SCP2:4120	0.782263
REACTOME_SYNTHESIS_OF_BILE_ACIDS_AND_BILE_SALTS_VIA_24_HYDROXYCHOLESTEROL	0.163986	0.0726272	0.086	0.271396	10	SLC27A2:250, SLC27A5:862, CYP46A1:2869, AMACR:4413, CYP27A1:4638, AKR1C4:5256, CYP8B1:7202, AKR1D1:8805, HSD3B7:9232, CYP39A1:13964	0.782263
KEGG_TIGHT_JUNCTION	0.0654919	0.0118399	0.087	0.0764212	125	PRKCH:7, MYH4:20, MYH13:45, MYH1:46, MYH2:298, EPB41L2:302, CLDN11:309, MAGI2:318, RAB3B:530, MYH8:654	0.782263
KEGG_CYSTEINE_AND_METHIONINE_METABOLISM	0.0926054	0.0659166	0.088	0.255375	33	MAT2B:380, AMD1:596, MTAP:767, GOT2:1437, AHCYL1:1753, MAT1A:1859, LDHAL6A:2144, LDHA:2202, BHMT:2659, LDHB:2690	0.782263
PID_ECADHERIN_KERATINOCYTE_PATHWAY	0.120511	0.0691486	0.089	0.263559	19	JUP:291, CASR:806, AKT2:1353, FMN1:1896, PLCG1:2586, CTNNB1:2854, CTNND1:3372, FYN:3787, ZYX:4869, CTNNA1:5780	0.782263
KEGG_BUTANOATE_METABOLISM	0.152381	0.00213084	0.093	0.0256907	34	ALDH1B1:105, ALDH3A2:478, HMGCL:1160, BDH1:1171, GAD1:1477, GAD2:1523, ECHS1:1723, ACAT1:1957, ACSM5:2455, AKR1B10:2990	0.79325
REACTOME_MEMBRANE_TRAFFICKING	0.0632569	0.0201714	0.094	0.111116	114	MYO6:55, FTH1:108, FTL:140, STAM:168, CHMP4B:222, CLTA:642, VPS37A:742, GJA1:763, AP4E1:823, GJB4:934	0.79325
REACTOME_TRIGLYCERIDE_BIOSYNTHESIS	0.122166	0.00925405	0.095	0.0657319	38	LPIN3:164, LPCAT4:306, AGPAT9:490, SLC25A1:907, LPIN2:944, ELOVL4:1005, DGAT2:1023, ACACA:1075, GPD1:1505, GPD1L:2176	0.79325
KEGG_AMYOTROPHIC_LATERAL_SCLEROSIS_ALS	0.0669701	0.0986415	0.098	0.311269	51	NEFL:25, NEFM:184, TOMM40:227, PPP3CB:816, DERL1:1169, MAPK12:1549, GRIA2:1682, SOD1:1824, BAD:2160, MAP3K5:2280	0.795238
REACTOME_REGULATION_OF_GENE_EXPRESSION_IN_BETA_CELLS	0.125761	0.0578771	0.099	0.234815	19	PAX6:448, MAFA:835, GCK:914, AKT2:1353, HNF4A:1586, PKLR:1937, NEUROD1:1945, FOXA2:2986, NKX2-2:4507, FOXO1:4996	0.795238
REACTOME_PURINE_SALVAGE	0.200522	0.0123364	0.1	0.0784373	13	AMPD3:62, ADK:208, HPRT1:1034, GMPR:1636, DGUOK:2499, DCK:2719, AMPD1:3018, AMPD2:4995, PNP:8048, ADAL:8611	0.795238
REACTOME_BOTULINUM_NEUROTOXICITY	0.122871	0.0889829	0.106	0.29692	16	STX1A:30, STX11:32, SYT2:341, SYT1:1182, VAMP2:2195, STX3:5134, STX8:6217, STX10:7380, VAMP1:7394, STX6:8902	0.797366
BIOCARTA_CARM1_PATHWAY	0.145596	0.0808519	0.109	0.283092	12	CREB1:182, RARA:270, PRKAR2B:2282, PRKAR1B:2608, PRKAR1A:3408, PRKACB:3730, CARM1:7044, PRKAR2A:8639, CREBBP:9723, EP300:10156	0.797366
KEGG_RETINOL_METABOLISM	0.114803	0.00390616	0.11	0.0372543	53	ADH7:200, CYP2B6:273, ADH1C:734, CYP3A4:773, DGAT2:1023, DHRS4:1088, ALDH1A2:1110, UGT2A3:1735, CYP4A22:1935, CYP26B1:2260	0.797366
REACTOME_SYNTHESIS_OF_BILE_ACIDS_AND_BILE_SALTS	0.165544	0.0125388	0.11	0.0793294	19	SLC27A2:250, HSD17B4:276, ABCB11:782, SLC27A5:862, CYP46A1:2869, ACOX2:3315, CYP7A1:3718, SCP2:4120, AMACR:4413, CYP27A1:4638	0.797366
KEGG_SULFUR_METABOLISM	0.15638	0.0509958	0.11	0.217168	13	PAPSS2:724, SULT1E1:728, SULT1A2:2059, SULT1A4:2134, PAPSS1:2348, SULT1A1:3445, SULT1A3:4351, CHST11:5587, BPNT1:6344, SUOX:7596	0.797366
REACTOME_LYSOSOME_VESICLE_BIOGENESIS	0.108069	0.103142	0.112	0.320637	19	CLTA:642, VAMP8:1150, VAMP2:2195, DNAJC6:2602, TXNDC5:3142, AP1M1:3412, GNS:3635, ARRB1:5195, AP1G1:5568, DNASE2:7367	0.797366
REACTOME_SPRY_REGULATION_OF_FGF_SIGNALING	0.146676	0.108344	0.112	0.329837	10	GRB2:982, PPP2CB:2262, MKNK1:2864, SPRY2:4238, MAPK3:4496, MAPK1:4578, SRC:7776, PPP2R1A:8370, BRAF:9647, CBL:15344	0.797366
REACTOME_RECYCLING_OF_BILE_ACIDS_AND_SALTS	0.252749	0.00371102	0.113	0.0362678	11	SLC10A2:401, ABCB11:782, SLC27A5:862, FABP6:1043, ALB:1153, SLCO1B1:2487, SLCO1A2:3399, SLCO1B3:3744, SLC10A1:8883, ABCC3:10337	0.797366
KEGG_GLYOXYLATE_AND_DICARBOXYLATE_METABOLISM	0.125283	0.0828877	0.117	0.286299	16	CS:494, MTHFD1:2224, HAO1:2531, HYI:3160, MDH2:3682, ACO2:3819, MTHFD2L:3986, MTHFD1L:4455, GRHPR:5654, PGP:6131	0.814125
BIOCARTA_PROTEASOME_PATHWAY	0.110101	0.0569148	0.119	0.233132	25	PSMB4:1038, UBA1:1720, PSMB1:2035, PSMC2:2662, PSMA4:2693, PSMC4:2720, PSMC3:3528, PSMB7:3531, PSMC6:3864, PSMA6:3963	0.816699
KEGG_TYPE_II_DIABETES_MELLITUS	0.0997323	0.0208305	0.121	0.113282	45	SLC2A4:785, MAFA:835, GCK:914, CACNA1G:975, CACNA1D:1033, SOCS1:1123, PIK3CG:1731, PKLR:1937, IKBKB:1992, SOCS4:2001	0.819203
BIOCARTA_LEPTIN_PATHWAY	0.158223	0.0692926	0.124	0.263559	11	PRKAA2:95, PRKAB1:115, ACACA:1075, PRKAG3:1934, PRKAA1:2006, PRKAG1:2253, CPT1A:4713, PRKAB2:8245, LEP:14221, PRKAG2:15675	0.82832
REACTOME_SIGNALING_BY_GPCR	0.060634	4.56868e-09	0.126	8.34111e-07	872	OR10A4:1, PRKCH:7, OR10P1:12, OR51G1:14, OR51Q1:15, OR51I2:38, TAAR2:57, OR51A2:58, OR51G2:60, OR52E6:61	0.830605
BIOCARTA_NDKDYNAMIN_PATHWAY	0.120832	0.147385	0.135	0.39562	12	PPP3CB:816, AP2A1:1046, BIN1:3061, EPS15:4040, EPN1:4847, PICALM:4961, PPP3CA:5651, DNM1:5715, AMPH:6315, SYNJ1:8686	0.873538
BIOCARTA_NUCLEARRS_PATHWAY	0.115913	0.133349	0.136	0.377944	14	ABCB4:18, RARA:270, NR1H4:685, ABCB11:782, CYP1A2:3032, PPARG:3949, CYP2E1:5418, ABCB1:8305, PPARA:8950, PPARD:9965	0.873538
REACTOME_GRB2_SOS_PROVIDES_LINKAGE_TO_MAPK_SIGNALING_FOR_INTERGRINS_	0.108451	0.160202	0.14	0.413613	14	GRB2:982, ITGA2B:1181, FGB:1930, VWF:2041, ITGB3:3262, FGA:3802, RAP1B:4193, TLN1:4209, FGG:6692, SRC:7776	0.878296
REACTOME_GPCR_DOWNSTREAM_SIGNALING	0.0620395	1.35606e-08	0.142	1.57549e-06	771	OR10A4:1, PRKCH:7, OR10P1:12, OR51G1:14, OR51Q1:15, OR51I2:38, TAAR2:57, OR51A2:58, OR51G2:60, OR52E6:61	0.878296
REACTOME_AMINE_COMPOUND_SLC_TRANSPORTERS	0.131279	0.0183257	0.142	0.105974	27	SLC6A7:732, SLC6A9:1032, RHAG:1124, SLC6A20:1151, SLC6A12:1616, SLC6A14:1792, SLC14A2:2016, SLC5A7:2164, SLC6A19:2744, SLC44A2:2830	0.878296
REACTOME_STRIATED_MUSCLE_CONTRACTION	0.138126	0.0130646	0.146	0.0810516	27	NEB:10, MYL1:36, MYBPC1:37, MYBPC2:211, MYH8:654, MYL2:936, VIM:972, MYH6:1569, MYL3:2345, TNNI1:3111	0.892024
REACTOME_REGULATION_OF_AMPK_ACTIVITY_VIA_LKB1	0.12327	0.110423	0.149	0.33283	14	PRKAA2:95, PRKAB1:115, STRADB:706, CAB39L:1620, PRKAG3:1934, PRKAA1:2006, PRKAG1:2253, CAB39:2550, PRKAB2:8245, STRADA:8473	0.895906
REACTOME_ERKS_ARE_INACTIVATED	0.179147	0.039712	0.152	0.183992	11	DUSP4:376, DUSP7:1900, PPP2CB:2262, PPP2R5D:2596, MAPK3:4496, MAPK1:4578, MAPK7:5785, PPP2R1B:5847, DUSP3:8021, PPP2R1A:8370	0.895906
REACTOME_NA_CL_DEPENDENT_NEUROTRANSMITTER_TRANSPORTERS	0.139909	0.0459223	0.152	0.201875	17	SLC6A7:732, SLC6A9:1032, SLC6A20:1151, SLC6A12:1616, SLC6A14:1792, SLC6A19:2744, SLC6A6:4008, SLC6A11:4068, SLC6A5:4922, SLC6A3:5124	0.895906
KEGG_ARACHIDONIC_ACID_METABOLISM	0.0796438	0.0396481	0.155	0.183992	56	ALOX12B:90, ALOX5:209, CYP2B6:273, CBR1:319, CYP4F3:393, PTGS1:569, GGT7:597, PTGES2:690, PLA2G2E:909, PLA2G12A:925	0.900674
REACTOME_SYNTHESIS_AND_INTERCONVERSION_OF_NUCLEOTIDE_DI_AND_TRIPHOSPHATES	0.11938	0.0984409	0.159	0.311269	16	AK5:9, CMPK1:1055, AK2:1422, GLRX:1559, GSR:2117, RRM1:3209, GUK1:3650, AK1:3756, NME1-NME2:4615, NME4:8025	0.900674
REACTOME_NEURONAL_SYSTEM	0.0658449	0.000273835	0.16	0.00583268	263	NEFL:25, STX1A:30, STX11:32, MYO6:55, CREB1:182, SLC1A1:185, UNC13B:216, KCNA4:285, SYT2:341, KCNS2:406	0.900674
KEGG_ALPHA_LINOLENIC_ACID_METABOLISM	0.118164	0.0828072	0.16	0.286299	18	PLA2G2E:909, PLA2G12A:925, FADS2:2964, PLA2G5:3603, PLA2G6:4200, PLA2G2A:4523, ACOX1:4639, ACOX3:5055, PLA2G1B:5142, PLA2G10:5199	0.900674
REACTOME_PURINE_RIBONUCLEOSIDE_MONOPHOSPHATE_BIOSYNTHESIS	0.133436	0.125536	0.166	0.364626	11	ADSS:99, GMPS:811, ADSL:1345, IMPDH2:3048, PFAS:4525, ADSSL1:4728, ATIC:5914, IMPDH1:9284, PAICS:10762, PPAT:12643	0.919418
KEGG_CITRATE_CYCLE_TCA_CYCLE	0.138565	0.00868781	0.167	0.0630854	30	CS:494, DLST:592, DLD:609, PC:987, SUCLG1:1241, SDHB:2284, ACLY:2563, DLAT:2947, SDHA:3150, MDH2:3682	0.919418
KEGG_PHENYLALANINE_METABOLISM	0.122418	0.0807145	0.174	0.283092	17	ALDH3A1:620, PAH:1112, GOT2:1437, ALDH3B2:2113, MIF:2181, AOC3:3316, PRDX6:4034, AOC2:4123, ALDH3B1:4617, IL4I1:6524	0.943631
REACTOME_AMINO_ACID_AND_OLIGOPEPTIDE_SLC_TRANSPORTERS	0.0941813	0.0227991	0.178	0.122425	49	SLC1A1:185, SLC6A20:1151, SLC5A8:1253, SLC38A1:1524, SLC6A12:1616, SLC6A14:1792, SLC7A5:2159, SLC6A19:2744, SLC3A1:3072, SLC32A1:3076	0.943631
PID_NCADHERIN_PATHWAY	0.0622912	0.230498	0.18	0.503033	31	JUP:291, GJA1:763, KIF5B:771, MYL2:936, GRIA2:1682, PTPN1:2426, CAMK2G:2546, PLCG1:2586, CTNNB1:2854, DAGLA:3155	0.943631
REACTOME_OTHER_SEMAPHORIN_INTERACTIONS	0.10285	0.168041	0.183	0.424419	15	SEMA6D:1279, PLXNC1:2152, SEMA4A:2373, PLXNA1:2447, TYROBP:4433, SEMA5A:5980, SEMA7A:6826, PLXNA2:6969, SEMA3E:7436, ITGB1:8088	0.943631
REACTOME_METABOLISM_OF_LIPIDS_AND_LIPOPROTEINS	0.047919	0.000522337	0.184	0.01027	463	DHCR24:16, ABCB4:18, SLC27A1:22, TEAD2:63, FABP4:83, APOE:91, PRKAA2:95, LPIN3:164, MTMR7:221, SLC27A2:250	0.943631
KEGG_ETHER_LIPID_METABOLISM	0.0727031	0.155082	0.185	0.406416	32	LPCAT4:306, PLD2:796, PPAP2B:875, PLA2G2E:909, PLA2G12A:925, AGPS:1705, PLD1:1764, PAFAH1B3:2266, ENPP2:2445, PLA2G5:3603	0.943631
REACTOME_DOPAMINE_NEUROTRANSMITTER_RELEASE_CYCLE	0.141511	0.121351	0.187	0.357342	10	STX1A:30, SYT1:1182, RIMS1:1484, VAMP2:2195, SYN3:4493, SYN1:7497, SYN2:8519, RAB3A:11662, SLC18A2:11873, STXBP1:13127	0.943631
REACTOME_NCAM_SIGNALING_FOR_NEURITE_OUT_GROWTH	0.0680703	0.0602568	0.188	0.241396	64	SPTB:40, COL9A1:141, CREB1:182, SPTA1:558, CACNA1S:585, CACNA1G:975, GRB2:982, ST8SIA2:1256, COL3A1:1271, COL1A2:1291	0.943631
KEGG_ASCORBATE_AND_ALDARATE_METABOLISM	0.138064	0.0488631	0.193	0.210259	17	ALDH1B1:105, ALDH3A2:478, UGT2A3:1735, UGT2B11:3063, UGT2A1:3263, ALDH7A1:4971, UGT2B10:5049, UGT2B28:5266, MIOX:5327, ALDH2:6085	0.943631
REACTOME_ACYL_CHAIN_REMODELLING_OF_PG	0.115636	0.109458	0.193	0.331486	16	LPCAT4:306, LPGAT1:360, PLA2G2E:909, PLA2G12A:925, PLA2G5:3603, PLA2G2A:4523, PLA2G1B:5142, PLA2G10:5199, LPCAT1:6841, PLA2G4D:7415	0.943631
KEGG_GALACTOSE_METABOLISM	0.0853013	0.132521	0.194	0.377944	26	PFKM:48, PGM1:361, GCK:914, GALE:2397, GALT:2715, PGM2:2987, GANC:3344, GALK2:3626, LCT:4321, G6PC:4693	0.943631
KEGG_ALDOSTERONE_REGULATED_SODIUM_REABSORPTION	0.0636718	0.16408	0.194	0.41776	40	SFN:436, SCNN1G:1003, ATP1A3:1479, PIK3CG:1731, PRKCG:1773, PRKCB:2273, ATP1A1:3138, KCNJ1:3680, PIK3R2:3688, PIK3R5:3804	0.943631
KEGG_LONG_TERM_POTENTIATION	0.0633517	0.0851897	0.2	0.288786	62	GRM1:534, PPP3CB:816, MAP2K2:1377, GRIA2:1682, PRKCG:1773, PPP1R1A:2049, PRKCB:2273, GRIN2B:2308, CAMK2G:2546, PLCB4:2558	0.944363
KEGG_LEUKOCYTE_TRANSENDOTHELIAL_MIGRATION	0.0558284	0.0430167	0.201	0.194948	111	CLDN11:309, MYL2:936, ITGAM:1004, CLDN9:1295, MAPK12:1549, CLDN16:1701, PIK3CG:1731, PRKCG:1773, MYL12B:1842, VAV3:1853	0.944363
KEGG_PEROXISOME	0.0972203	0.00347637	0.204	0.0349827	76	SLC27A2:250, HSD17B4:276, ABCD3:293, SLC25A17:366, XDH:487, DHRS4:1088, HMGCL:1160, PHYH:1335, AGPS:1705, SOD1:1824	0.944363
REACTOME_GAP_JUNCTION_TRAFFICKING	0.107805	0.0622847	0.206	0.245158	25	MYO6:55, CLTA:642, GJA1:763, GJB4:934, GJC2:1020, GJB3:2289, GJB6:2876, CLTCL1:3380, GJC1:3490, GJD2:4495	0.944363
REACTOME_AMINE_LIGAND_BINDING_RECEPTORS	0.0819607	0.0848878	0.206	0.288528	37	TAAR2:57, TAAR5:300, HRH3:419, HTR1E:1234, HTR6:1532, ADRB1:1815, HTR1F:1952, HRH1:1986, HTR1A:2206, ADRB2:3552	0.944363
BIOCARTA_RAC1_PATHWAY	0.0936947	0.120116	0.207	0.355482	23	WASF1:292, LIMK1:571, MYL2:936, PIK3CG:1731, PLD1:1764, CHN1:2649, NCF2:2895, RALBP1:2959, CDK5R1:3280, CFL1:3515	0.944363
REACTOME_VOLTAGE_GATED_POTASSIUM_CHANNELS	0.0968563	0.028219	0.208	0.142999	43	KCNA4:285, KCNS2:406, KCNAB3:740, KCNQ5:912, KCNS1:1071, KCNC2:1506, KCND2:1617, KCNA7:1710, KCNC3:2240, KCNH5:2446	0.944363
REACTOME_NCAM1_INTERACTIONS	0.0884206	0.0563722	0.211	0.231652	39	COL9A1:141, CACNA1S:585, CACNA1G:975, ST8SIA2:1256, COL3A1:1271, COL1A2:1291, CACNB3:1883, CACNB2:1990, COL9A2:2101, COL6A1:2650	0.944363
REACTOME_TRANS_GOLGI_NETWORK_VESICLE_BUDDING	0.0432107	0.281972	0.212	0.560351	52	FTH1:108, FTL:140, CLTA:642, AP4E1:823, VAMP8:1150, TGOLN2:1759, SNAP23:1808, BLOC1S3:2151, VAMP2:2195, DNAJC6:2602	0.944363
KEGG_PRIMARY_BILE_ACID_BIOSYNTHESIS	0.126148	0.0807854	0.213	0.283092	16	HSD17B4:276, SLC27A5:862, CYP46A1:2869, ACOX2:3315, CYP7A1:3718, SCP2:4120, AMACR:4413, CYP27A1:4638, AKR1C4:5256, CYP8B1:7202	0.944363
KEGG_ALZHEIMERS_DISEASE	0.0605113	0.0112403	0.217	0.0748182	149	RYR3:89, APOE:91, ATP2A1:131, ATP5B:143, CAPN1:153, LPL:510, CACNA1S:585, ADAM10:717, PPP3CB:816, IDE:882	0.946333
BIOCARTA_PLCE_PATHWAY	0.132525	0.146845	0.22	0.39562	10	PRKAR2B:2282, PRKAR1B:2608, PRKAR1A:3408, ADRB2:3552, PRKACB:3730, ADCY1:6405, PTGER1:6903, PRKAR2A:8639, PLCE1:8702, GNAS:16864	0.946333
BIOCARTA_CFTR_PATHWAY	0.124154	0.154049	0.22	0.405926	11	PRKAR2B:2282, PRKAR1B:2608, PRKAR1A:3408, ADRB2:3552, PRKACB:3730, CFTR:4216, EZR:4747, ADCY1:6405, PRKAR2A:8639, SLC9A3R1:15107	0.946333
SIG_REGULATION_OF_THE_ACTIN_CYTOSKELETON_BY_RHO_GTPASES	0.0820019	0.120441	0.221	0.355482	30	PAK6:171, WASF1:292, MYH2:298, GDI1:367, LIMK1:571, FSCN1:1676, PFN1:1678, RPS4X:1869, PAK3:2396, CFL1:3515	0.946333
REACTOME_EXTRACELLULAR_MATRIX_ORGANIZATION	0.0748235	0.0188121	0.223	0.107811	83	COL28A1:8, CTRB1:54, COL9A1:141, COL14A1:223, COL16A1:325, COL8A1:417, MMP8:488, COL17A1:572, COL19A1:679, KLKB1:1226	0.946805
REACTOME_MUSCLE_CONTRACTION	0.100347	0.028309	0.226	0.142999	40	NEB:10, MYL1:36, MYBPC1:37, MYBPC2:211, MYH8:654, MYL2:936, VIM:972, MYH6:1569, MYL12B:1842, MYL3:2345	0.951479
REACTOME_SLC_MEDIATED_TRANSMEMBRANE_TRANSPORT	0.055453	0.00343543	0.228	0.0349386	239	SLC4A1:19, SLC27A1:22, SLC12A1:106, SLC1A1:185, SLC28A3:301, SLC34A1:391, SLC22A6:397, SLC4A3:694, SLC6A7:732, SLC2A4:785	0.9519
REACTOME_PKA_MEDIATED_PHOSPHORYLATION_OF_CREB	0.0959742	0.184021	0.231	0.450535	16	CREB1:182, PRKAR2B:2282, PRKAR1B:2608, ADCY8:2897, PRKAR1A:3408, PRKACB:3730, ADCY2:4174, ADCY1:6405, ADCY4:6866, ADCY5:8135	0.95446
REACTOME_XENOBIOTICS	0.167901	0.0440921	0.236	0.19634	12	CYP2B6:273, CYP3A4:773, CYP2D6:2504, CYP1A2:3032, CYP2C19:3847, CYP2A6:4106, CYP2E1:5418, CYP2C9:6116, CYP2F1:6259, CYP2C8:9414	0.95446
REACTOME_CELL_CELL_COMMUNICATION	0.0551378	0.0394294	0.238	0.183992	118	JUP:291, CLDN11:309, MAGI2:318, CDH11:536, COL17A1:572, PVRL3:714, CDH6:956, GRB2:982, CD47:1065, LAMB3:1211	0.95446
REACTOME_TRANSMISSION_ACROSS_CHEMICAL_SYNAPSES	0.0590769	0.00792127	0.239	0.0599017	172	NEFL:25, STX1A:30, MYO6:55, CREB1:182, SLC1A1:185, UNC13B:216, GABRA1:462, SLC18A3:466, KCNJ3:842, AP2B1:969	0.95446
REACTOME_METABOLISM_OF_POLYAMINES	0.0889597	0.233124	0.241	0.504969	15	AMD1:596, MTAP:767, ADC:2926, SRM:3636, SMS:4226, PAOX:5330, SMOX:6864, AGMAT:7524, MRI1:8515, ENOPH1:8753	0.95446
REACTOME_REGULATION_OF_APOPTOSIS	0.059663	0.141215	0.242	0.387279	51	PSMB4:1038, UNC5A:1556, DAPK2:1703, PSMB1:2035, PSME4:2331, PSMC2:2662, PSMA4:2693, PSMC4:2720, PSMA8:3285, APPL1:3525	0.95446
REACTOME_GLYCOGEN_BREAKDOWN_GLYCOGENOLYSIS	0.142891	0.0745574	0.245	0.274595	13	PYGM:93, PGM1:361, PYGL:1149, PYGB:2804, PGM2:2987, GYG2:3532, PHKB:4754, GYG1:6095, PHKG1:6554, AGL:7906	0.95446
KEGG_CIRCADIAN_RHYTHM_MAMMAL	0.104495	0.192224	0.245	0.461772	13	CSNK1E:194, CSNK1D:1785, NPAS2:2255, CLOCK:3935, ARNTL:4307, PER2:5402, CRY1:5560, NR1D1:5652, PER1:6787, CRY2:7715	0.95446
KEGG_GLUTATHIONE_METABOLISM	0.0619023	0.134535	0.247	0.377944	49	GSTA5:429, GSTM4:565, GGT7:597, GSTT2:674, GGCT:927, MGST1:2065, GSR:2117, LAP3:2252, GSTO1:2466, MGST3:2799	0.95446
REACTOME_POTASSIUM_CHANNELS	0.0648925	0.0311349	0.25	0.155329	93	KCNA4:285, KCNS2:406, KCNAB3:740, HCN2:834, KCNJ3:842, KCNQ5:912, KCNS1:1071, KCNMB4:1210, KCNN4:1491, KCNC2:1506	0.95446
BIOCARTA_MCALPAIN_PATHWAY	0.0792356	0.179396	0.25	0.443459	24	CAPN1:153, MYL2:936, CAPNS2:1885, CAPNS1:1916, PRKAR2B:2282, CAPN2:2312, PRKAR1B:2608, PRKAR1A:3408, PRKACB:3730, TLN1:4209	0.95446
REACTOME_CELL_JUNCTION_ORGANIZATION	0.0552245	0.0947897	0.254	0.304475	77	JUP:291, CLDN11:309, CDH11:536, COL17A1:572, PVRL3:714, CDH6:956, LAMB3:1211, CLDN9:1295, CDH9:1541, TESK1:1568	0.95446
BIOCARTA_PPARA_PATHWAY	0.0403943	0.301047	0.256	0.578553	55	HSD17B4:276, LPL:510, NRIP1:891, FABP1:1352, PIK3CG:1731, PRKCB:2273, PRKAR2B:2282, SRA1:2298, CITED2:2440, PRKAR1B:2608	0.95446
REACTOME_VIF_MEDIATED_DEGRADATION_OF_APOBEC3G	0.067803	0.133595	0.257	0.377944	41	PSMB4:1038, PSMB1:2035, PSME4:2331, PSMC2:2662, PSMA4:2693, PSMC4:2720, PSMA8:3285, PSMC3:3528, PSMB7:3531, PSME2:3813	0.95446
REACTOME_ROLE_OF_DCC_IN_REGULATING_APOPTOSIS	0.103795	0.255852	0.259	0.532034	10	UNC5A:1556, DAPK2:1703, APPL1:3525, MAGED1:4049, DCC:7019, CASP3:7509, UNC5B:9403, DAPK3:10713, DAPK1:10771, CASP9:11731	0.95446
REACTOME_FATTY_ACYL_COA_BIOSYNTHESIS	0.111261	0.102407	0.26	0.319991	18	SLC25A1:907, ELOVL4:1005, ACACA:1075, ACSL4:2555, ACLY:2563, ACSL3:2623, ELOVL1:2743, FASN:5867, HSD17B12:6436, ACSL5:7148	0.95446
REACTOME_UNBLOCKING_OF_NMDA_RECEPTOR_GLUTAMATE_BINDING_AND_ACTIVATION	0.110485	0.138643	0.261	0.381045	15	NEFL:25, GRIA4:1486, GRIA2:1682, GRIN2B:2308, GRIN2C:2618, GRIN1:2797, CAMK2A:3139, GRIA1:3386, GRIN2A:7707, ACTN2:10586	0.95446
REACTOME_ACTIVATION_OF_THE_AP1_FAMILY_OF_TRANSCRIPTION_FACTORS	0.118019	0.196368	0.265	0.464917	10	ATF2:2770, MAPK11:3549, MAPK9:3782, MAPK10:3915, MAPK3:4496, MAPK1:4578, JUN:6915, MAPK8:11088, FOS:11417, MAPK14:12697	0.962065
KEGG_PROTEASOME	0.0646701	0.157569	0.271	0.409294	40	PSMB4:1038, POMP:1599, PSMB1:2035, PSME4:2331, PSMC2:2662, PSMA4:2693, PSMC4:2720, PSMA8:3285, PSMC3:3528, PSMB7:3531	0.966965
NABA_COLLAGENS	0.102045	0.0193687	0.274	0.109296	44	COL28A1:8, COL9A1:141, COL14A1:223, COL16A1:325, COL8A1:417, COL17A1:572, COL19A1:679, COL3A1:1271, COL1A2:1291, COL12A1:1635	0.966965
KEGG_FC_GAMMA_R_MEDIATED_PHAGOCYTOSIS	0.0392618	0.197014	0.274	0.464917	91	WASF1:292, DNM1L:455, PIKFYVE:456, LIMK1:571, PLD2:796, PPAP2B:875, AKT2:1353, PIK3CG:1731, PLD1:1764, PRKCG:1773	0.966965
REACTOME_CREB_PHOSPHORYLATION_THROUGH_THE_ACTIVATION_OF_CAMKII	0.108557	0.193037	0.275	0.461988	12	NEFL:25, CREB1:182, GRIN2B:2308, GRIN2C:2618, GRIN1:2797, CAMK2A:3139, GRIN2A:7707, ACTN2:10586, GRIN2D:12348, CAMK2D:12598	0.966965
REACTOME_REGULATION_OF_ORNITHINE_DECARBOXYLASE_ODC	0.0640057	0.138029	0.276	0.380997	45	PSMB4:1038, PSMB1:2035, PSME4:2331, AZIN1:2367, PSMC2:2662, PSMA4:2693, PSMC4:2720, PSMA8:3285, PSMC3:3528, PSMB7:3531	0.966965
ST_JNK_MAPK_PATHWAY	0.0607825	0.189619	0.278	0.458097	39	DUSP4:376, GADD45A:489, DLD:609, GCK:914, MAP3K12:978, MAP3K10:1164, MAP3K9:2207, MAP3K5:2280, DUSP8:2665, MYEF2:2768	0.967208
REACTOME_GOLGI_ASSOCIATED_VESICLE_BIOGENESIS	0.0438707	0.309347	0.285	0.588312	45	FTH1:108, FTL:140, CLTA:642, AP4E1:823, VAMP8:1150, TGOLN2:1759, BLOC1S3:2151, VAMP2:2195, DNAJC6:2602, TXNDC5:3142	0.984724
REACTOME_CITRIC_ACID_CYCLE_TCA_CYCLE	0.139158	0.0358465	0.288	0.169832	19	CS:494, DLST:592, DLD:609, SUCLG1:1241, SDHB:2284, SDHA:3150, MDH2:3682, ACO2:3819, SDHD:3989, IDH3B:5246	0.985074
KEGG_GLYCOSAMINOGLYCAN_BIOSYNTHESIS_HEPARAN_SULFATE	0.0830228	0.14318	0.291	0.388694	26	HS3ST3B1:712, EXT1:1098, B3GAT2:1248, HS6ST1:1490, HS6ST3:1807, HS3ST3A1:2556, XYLT1:3459, B3GAT3:3579, NDST3:3910, HS2ST1:5091	0.985074
REACTOME_SYNTHESIS_OF_SUBSTRATES_IN_N_GLYCAN_BIOSYTHESIS	0.0771761	0.317601	0.291	0.591462	14	GMPPA:453, ALG5:1137, GMPPB:2076, GNPNAT1:3329, GFPT2:3416, DOLK:3932, DPM1:4545, DPM3:9178, MPI:10539, DOLPP1:10971	0.985074
KEGG_PENTOSE_AND_GLUCURONATE_INTERCONVERSIONS	0.090725	0.171237	0.296	0.428264	19	UGT2A3:1735, CRYL1:1902, UGT2B11:3063, UGT2A1:3263, DHDH:3597, XYLB:4635, AKR1B1:4830, RPE:4942, UGT2B10:5049, UGT2B28:5266	0.985942
KEGG_NITROGEN_METABOLISM	0.0889142	0.149119	0.297	0.397857	22	CA3:68, CA5B:463, CA8:889, CA2:910, GLS2:1730, CPS1:2877, GLS:3279, ASNS:3293, CA12:4760, CTH:5304	0.985942
REACTOME_TRANSMEMBRANE_TRANSPORT_OF_SMALL_MOLECULES	0.0395936	0.00761474	0.3	0.0589796	398	SLC4A1:19, SLC27A1:22, ATP11B:56, ABCA12:103, SLC12A1:106, FTH1:108, ATP2A1:131, FTL:140, SLC1A1:185, GLRA1:215	0.985942
REACTOME_SIGNAL_REGULATORY_PROTEIN_SIRP_FAMILY_INTERACTIONS	0.0872617	0.295419	0.3	0.574174	12	GRB2:982, CD47:1065, SIRPA:3826, TYROBP:4433, SKAP2:6559, SIRPB1:6935, SIRPG:7285, PTK2B:7659, SRC:7776, PTPN6:9573	0.985942
REACTOME_GLUCURONIDATION	0.129597	0.136788	0.303	0.380033	11	SLC35D1:1174, UGT2B11:3063, UGT2A1:3263, UGT2B10:5049, UGT2B28:5266, UGP2:5326, UGT1A4:7513, UGT2B7:7999, UGT2B4:8369, UGT2B17:8481	0.985942
REACTOME_CDK_MEDIATED_PHOSPHORYLATION_AND_REMOVAL_OF_CDC6	0.0593812	0.18893	0.305	0.458097	41	PSMB4:1038, PSMB1:2035, PSME4:2331, PSMC2:2662, PSMA4:2693, PSMC4:2720, PSMA8:3285, PSMC3:3528, PSMB7:3531, PSME2:3813	0.985942
REACTOME_DEADENYLATION_OF_MRNA	0.0842787	0.229203	0.306	0.503033	17	RQCD1:1089, CNOT4:1780, TNKS1BP1:1888, EIF4A2:3509, EIF4G1:3726, CNOT10:4165, CNOT7:4586, EIF4A3:4938, PABPC1:5741, CNOT2:5801	0.985942
REACTOME_AXON_GUIDANCE	0.0380026	0.0490564	0.307	0.210383	230	SPTB:40, ANK1:87, COL9A1:141, PAK6:171, CREB1:182, ALCAM:416, SPTA1:558, LIMK1:571, CACNA1S:585, CLTA:642	0.985942
REACTOME_ER_PHAGOSOME_PATHWAY	0.0489039	0.223355	0.311	0.494212	52	PSMB4:1038, PSMB1:2035, PSME4:2331, PSMC2:2662, PSMA4:2693, PSMC4:2720, PSMA8:3285, PSMC3:3528, PSMB7:3531, HLA-C:3612	0.986441
BIOCARTA_MEF2D_PATHWAY	0.0790227	0.274028	0.312	0.552956	16	PPP3CB:816, CAPNS2:1885, CAPNS1:1916, CABIN1:2219, PRKCB:2273, CAPN2:2312, HDAC1:5302, PPP3CA:5651, PRKCA:5812, TRA@:6168	0.986441
REACTOME_PYRUVATE_METABOLISM	0.0885104	0.193834	0.315	0.462563	18	PDHX:464, PDP1:497, DLD:609, LDHA:2202, LDHB:2690, DLAT:2947, SLC16A8:2985, PDHB:4978, BSG:5338, PDK2:6810	0.986441
REACTOME_DESTABILIZATION_OF_MRNA_BY_AUF1_HNRNP_D0	0.0595853	0.16736	0.316	0.424342	45	PSMB4:1038, PSMB1:2035, PSME4:2331, PSMC2:2662, PSMA4:2693, PSMC4:2720, PSMA8:3285, PSMC3:3528, PSMB7:3531, EIF4G1:3726	0.986441
REACTOME_PYRUVATE_METABOLISM_AND_CITRIC_ACID_TCA_CYCLE	0.0930581	0.0419833	0.317	0.192311	40	PDHX:464, CS:494, PDP1:497, DLST:592, DLD:609, SUCLG1:1241, LDHA:2202, SDHB:2284, LDHB:2690, DLAT:2947	0.986441
REACTOME_TRAFFICKING_OF_AMPA_RECEPTORS	0.0860976	0.136518	0.321	0.380033	25	MYO6:55, AP2B1:969, AP2A1:1046, GRIA4:1486, GRIA2:1682, PRKCG:1773, GRIP2:2130, PRKCB:2273, CAMK2A:3139, GRIA1:3386	0.987627
REACTOME_COLLAGEN_FORMATION	0.0778367	0.0462828	0.327	0.201875	55	COL28A1:8, COL9A1:141, COL14A1:223, COL16A1:325, COL8A1:417, COL17A1:572, COL19A1:679, COL3A1:1271, COL1A2:1291, COL12A1:1635	0.987627
KEGG_MATURITY_ONSET_DIABETES_OF_THE_YOUNG	0.0696199	0.238127	0.327	0.512334	24	PAX6:448, MAFA:835, GCK:914, HNF4A:1586, PKLR:1937, NEUROD1:1945, FOXA2:2986, ONECUT1:3113, NKX2-2:4507, MNX1:4816	0.987627
REACTOME_PROTEOLYTIC_CLEAVAGE_OF_SNARE_COMPLEX_PROTEINS	0.0759076	0.325621	0.328	0.600617	14	STX1A:30, STX11:32, VAMP2:2195, STX3:5134, STX8:6217, STX10:7380, VAMP1:7394, STX6:8902, STX2:9077, STX4:10077	0.987627
KEGG_DRUG_METABOLISM_OTHER_ENZYMES	0.0725653	0.108397	0.331	0.329837	41	XDH:487, UMPS:568, CYP3A4:773, GMPS:811, HPRT1:1034, UGT2A3:1735, NAT1:2622, IMPDH2:3048, UGT2B11:3063, UGT2A1:3263	0.987627
REACTOME_DEADENYLATION_DEPENDENT_MRNA_DECAY	0.0662533	0.158125	0.332	0.409905	38	RQCD1:1089, CNOT4:1780, TNKS1BP1:1888, EDC3:2825, DIS3:2880, EXOSC4:3005, EIF4A2:3509, EIF4G1:3726, LSM1:3927, CNOT10:4165	0.987627
REACTOME_SIGNALING_BY_WNT	0.0522358	0.181105	0.332	0.446819	55	PSMB4:1038, PPP2R5B:1858, PSMB1:2035, PPP2CB:2262, FRAT1:2271, PPP2R5E:2297, PSME4:2331, PPP2R5D:2596, PSMC2:2662, PSMA4:2693	0.987627
REACTOME_AMINO_ACID_TRANSPORT_ACROSS_THE_PLASMA_MEMBRANE	0.0836382	0.107399	0.335	0.329235	31	SLC6A20:1151, SLC38A1:1524, SLC6A12:1616, SLC6A14:1792, SLC7A5:2159, SLC6A19:2744, SLC3A1:3072, SLC7A8:3132, SLC7A10:3800, SLC6A6:4008	0.987627
REACTOME_REGULATION_OF_PYRUVATE_DEHYDROGENASE_PDH_COMPLEX	0.100078	0.230149	0.339	0.503033	12	PDHX:464, PDP1:497, DLD:609, DLAT:2947, PDHB:4978, PDK2:6810, PDPR:7870, PDP2:9663, PDK4:9720, PDK3:9784	0.987627
REACTOME_AMINO_ACID_SYNTHESIS_AND_INTERCONVERSION_TRANSAMINATION	0.0792754	0.272497	0.34	0.552956	16	PHGDH:258, GOT2:1437, GLS2:1730, CCBL1:2812, GLS:3279, ASNS:3293, GPT2:5845, PSAT1:6139, GLUD1:6386, GOT1:11042	0.987627
REACTOME_SIGNALING_BY_NODAL	0.10848	0.121696	0.343	0.357534	17	SMAD3:271, ACVR2A:337, LEFTY1:1120, SMAD4:2502, SMAD2:3149, FOXO3:3350, LEFTY2:4159, ACVR2B:5411, ACVR1C:5795, NODAL:6019	0.987627
REACTOME_ALPHA_LINOLENIC_ACID_ALA_METABOLISM	0.11889	0.172273	0.348	0.43001	11	HSD17B4:276, ACAA1:2295, FADS2:2964, SCP2:4120, ACOX1:4639, ACOT8:5107, ACSL1:7504, FADS1:7552, ELOVL5:10595, ELOVL2:11553	0.987627
REACTOME_TANDEM_PORE_DOMAIN_POTASSIUM_CHANNELS	0.0687421	0.409798	0.349	0.668399	12	KCNK1:1574, KCNK18:2536, KCNK17:3461, KCNK3:3561, KCNK16:4992, KCNK6:5321, KCNK10:5954, KCNK7:6676, KCNK2:9057, KCNK13:14286	0.987627
PID_ARF6_DOWNSTREAM_PATHWAY	0.0984943	0.280933	0.358	0.559262	10	TIAM1:289, PLD2:796, PLD1:1764, MAPK3:4496, MAPK1:4578, PLAUR:5895, RAB11FIP3:11202, RAC1:12490, KALRN:12843, PIP5K1A:15955	0.987627
KEGG_FRUCTOSE_AND_MANNOSE_METABOLISM	0.0592557	0.239307	0.36	0.513145	33	PFKM:48, MTMR7:221, GMPPA:453, ALDOC:1015, TPI1:1989, GMPPB:2076, ALDOA:2192, AKR1B10:2990, PFKFB3:3423, AKR1B1:4830	0.987627
BIOCARTA_WNT_PATHWAY	0.0584057	0.312492	0.362	0.589468	25	CSNK1D:1785, FRAT1:2271, CTBP1:2362, SMAD4:2502, WIF1:2590, CTNNB1:2854, MAP3K7:3192, WNT1:3714, HDAC1:5302, CSNK2A1:6030	0.987627
KEGG_HYPERTROPHIC_CARDIOMYOPATHY_HCM	0.048185	0.137399	0.364	0.380195	80	TTN:69, PRKAA2:95, PRKAB1:115, ITGB6:551, CACNA1S:585, MYL2:936, CACNA1D:1033, SGCD:1096, CACNA2D3:1142, ITGA2B:1181	0.987627
REACTOME_EGFR_DOWNREGULATION	0.0632275	0.353319	0.367	0.62408	18	STAM:168, CLTA:642, AP2B1:969, GRB2:982, AP2A1:1046, EPS15:4040, SPRY2:4238, EPN1:4847, EGFR:7429, SH3KBP1:8302	0.987627
REACTOME_ACYL_CHAIN_REMODELLING_OF_PC	0.0645235	0.295142	0.368	0.574174	22	LPCAT4:306, PLA2G2E:909, PLA2G12A:925, PLBD1:2754, PLA2G5:3603, PLA2G6:4200, PLA2G2A:4523, PNPLA8:4779, PLA2G1B:5142, PLA2G10:5199	0.987627
PID_HNF3B_PATHWAY	0.0498687	0.253147	0.37	0.531071	44	CREB1:182, UCP2:775, GCK:914, ALB:1153, BDH1:1171, HNF4A:1586, ACADM:1717, PKLR:1937, CPT1C:2353, FOXA2:2986	0.987627
REACTOME_AUTODEGRADATION_OF_THE_E3_UBIQUITIN_LIGASE_COP1	0.0527309	0.237726	0.372	0.512333	42	PSMB4:1038, PSMB1:2035, PSME4:2331, PSMC2:2662, PSMA4:2693, PSMC4:2720, PSMA8:3285, PSMC3:3528, PSMB7:3531, PSME2:3813	0.987627
REACTOME_RETROGRADE_NEUROTROPHIN_SIGNALLING	0.0997184	0.274997	0.372	0.552956	10	CLTA:642, AP2B1:969, AP2A1:1046, DNAL4:2548, DNM1:5715, DNM2:8768, NTRK1:10083, NGF:11301, SH3GL2:11756, AP2A2:17229	0.987627
REACTOME_NUCLEAR_RECEPTOR_TRANSCRIPTION_PATHWAY	0.0361378	0.392162	0.375	0.65411	47	RARA:270, RXRB:959, NR1D2:1216, HNF4A:1586, NRBP1:1609, ESRRG:1884, NR4A2:1912, THRB:2131, NRBF2:2488, RORB:2494	0.987627
KEGG_TRYPTOPHAN_METABOLISM	0.0807378	0.0776582	0.376	0.278784	40	ALDH1B1:105, ALDH3A2:478, WARS:860, TPH2:965, ECHS1:1723, ACAT1:1957, CAT:2805, INMT:3027, CYP1A2:3032, GCDH:3578	0.987627
REACTOME_LIPID_DIGESTION_MOBILIZATION_AND_TRANSPORT	0.0705127	0.114373	0.377	0.342315	42	FABP4:83, APOE:91, ABHD5:444, LPL:510, PNLIP:526, PNLIPRP2:539, ABCG8:552, CLPS:858, ALB:1153, MTTP:1471	0.987627
KEGG_VASCULAR_SMOOTH_MUSCLE_CONTRACTION	0.0265957	0.348288	0.377	0.619933	105	PRKCH:7, CACNA1S:585, AVPR1A:722, PLA2G2E:909, PLA2G12A:925, CACNA1D:1033, KCNMB4:1210, MAP2K2:1377, ARHGEF1:1579, PRKCG:1773	0.987627
KEGG_BIOSYNTHESIS_OF_UNSATURATED_FATTY_ACIDS	0.0821572	0.192763	0.382	0.461988	21	PTPLB:992, ACAA1:2295, ACOT2:2821, FADS2:2964, SCD5:3065, ACOX1:4639, ACOX3:5055, PECR:5163, ACOT4:5798, HSD17B12:6436	0.987627
PID_NETRIN_PATHWAY	0.06049	0.251985	0.383	0.530998	30	NCK1:1273, MAP2K2:1377, UNC5A:1556, MAP1B:1734, PLCG1:2586, MAP2K1:2673, CAMK2A:3139, ELMO1:3520, NTN1:3625, FYN:3787	0.987627
REACTOME_INTRINSIC_PATHWAY	0.091901	0.20334	0.385	0.472488	16	C1QBP:470, GP1BA:887, KLKB1:1226, SERPING1:1591, A2M:2013, VWF:2041, GP9:3387, F12:5572, F11:6237, KNG1:9893	0.987627
REACTOME_SCF_BETA_TRCP_MEDIATED_DEGRADATION_OF_EMI1	0.0501904	0.255523	0.385	0.532034	43	PSMB4:1038, PSMB1:2035, PSME4:2331, PSMC2:2662, PSMA4:2693, PSMC4:2720, PSMA8:3285, PSMC3:3528, PSMB7:3531, PSME2:3813	0.987627
BIOCARTA_P35ALZHEIMERS_PATHWAY	0.0841229	0.357102	0.386	0.624597	10	CAPN1:153, CSNK1D:1785, CAPNS2:1885, CAPNS1:1916, APP:3226, CDK5R1:3280, CSNK1A1:13778, CDK5:14790, GSK3B:15436, MAPT:18436	0.987627
REACTOME_CELL_CELL_JUNCTION_ORGANIZATION	0.0496034	0.20006	0.387	0.468808	56	JUP:291, CLDN11:309, CDH11:536, PVRL3:714, CDH6:956, CLDN9:1295, CDH9:1541, CLDN16:1701, CLDN7:2061, CRB3:2292	0.987627
REACTOME_ADVANCED_GLYCOSYLATION_ENDPRODUCT_RECEPTOR_SIGNALING	0.0698676	0.383264	0.391	0.648756	13	CAPZA2:1906, SAA1:2866, DDOST:3098, APP:3226, MAPK3:4496, MAPK1:4578, LGALS3:5074, HMGB1:5797, S100A12:8299, PRKCSH:9590	0.987627
BIOCARTA_FIBRINOLYSIS_PATHWAY	0.115067	0.167678	0.395	0.424342	12	SERPINB2:412, PLG:1239, F13A1:1294, FGB:1930, FGA:3802, FGG:6692, F2R:9297, SERPINE1:9603, F2:10314, PLAU:10330	0.987627
REACTOME_N_GLYCAN_ANTENNAE_ELONGATION_IN_THE_MEDIAL_TRANS_GOLGI	0.104399	0.125384	0.397	0.364626	18	MGAT4B:169, FUT8:1070, ST8SIA2:1256, MGAT2:2532, MGAT4A:2664, MGAT5:4612, B4GALT2:5129, ST6GAL1:6200, MGAT4C:6365, B4GALT3:6373	0.987627
PID_EPHA_FWDPATHWAY	0.0535716	0.2874	0.397	0.563774	33	EPHA3:84, EPHA7:852, EPHA6:1179, EPHA8:1299, EPHA4:1652, PIK3CG:1731, VAV3:1853, PLCG1:2586, EPHA1:2817, HCK:3595	0.987627
PID_SYNDECAN_1_PATHWAY	0.0711166	0.0957025	0.398	0.30577	46	COL9A1:141, COL14A1:223, COL16A1:325, COL8A1:417, COL17A1:572, COL3A1:1271, COL1A2:1291, COL12A1:1635, COL10A1:2058, COL9A2:2101	0.987627
REACTOME_DEGRADATION_OF_THE_EXTRACELLULAR_MATRIX	0.0679145	0.213984	0.4	0.483996	28	CTRB1:54, MMP8:488, KLKB1:1226, PLG:1239, MMP3:2080, CTRB2:2756, TPSAB1:2843, PRSS1:2847, KLK2:3269, CTSG:4177	0.987627
REACTOME_ACYL_CHAIN_REMODELLING_OF_PS	0.0680875	0.361455	0.401	0.627635	15	LPCAT4:306, PLA2G2E:909, PLA2G12A:925, PLA2G5:3603, PLA2G2A:4523, PLA2G1B:5142, PLA2G10:5199, PLA2G4D:7415, LPCAT3:8530, PLA2G2D:8751	0.987627
REACTOME_TRANSPORT_OF_GLUCOSE_AND_OTHER_SUGARS_BILE_SALTS_AND_ORGANIC_ACIDS_METAL_IONS_AND_AMINE_COMPOUNDS	0.0520646	0.0906274	0.412	0.299281	89	SLC22A6:397, SLC6A7:732, SLC2A4:785, SLC22A7:885, SLC2A7:924, SLC22A5:929, SLC40A1:1025, SLC22A8:1031, SLC6A9:1032, RHAG:1124	0.987627
REACTOME_HDL_MEDIATED_LIPID_TRANSPORT	0.0898697	0.244515	0.412	0.519951	14	APOE:91, ALB:1153, A2M:2013, ABCA1:2340, CETP:2780, LCAT:6876, ABCG1:7585, PLTP:7630, AMN:7685, CUBN:9820	0.987627
REACTOME_PKB_MEDIATED_EVENTS	0.0468786	0.391017	0.418	0.65411	28	PRKAA2:95, PRKAB1:115, MLST8:362, EIF4EBP1:375, STRADB:706, AKT2:1353, CAB39L:1620, PRKAG3:1934, PRKAA1:2006, PRKAG1:2253	0.987627
REACTOME_TIGHT_JUNCTION_INTERACTIONS	0.04696	0.38189	0.419	0.648147	29	CLDN11:309, CLDN9:1295, CLDN16:1701, CLDN7:2061, CRB3:2292, CLDN3:2324, CLDN17:2347, INADL:2450, CLDN10:2543, PARD3:2782	0.987627
REACTOME_PYRIMIDINE_METABOLISM	0.0665714	0.269444	0.423	0.550079	23	UMPS:568, DCTD:2687, DCK:2719, NT5C1A:2856, TYMS:2857, DPYD:3564, UPP2:4871, NT5E:4924, UPB1:4936, UCK2:6292	0.987627
REACTOME_CIRCADIAN_CLOCK	0.0423738	0.31062	0.423	0.588446	48	CREB1:182, CSNK1E:194, NCOA2:386, NAMPT:801, SMARCD3:1167, CCRN4L:1754, CSNK1D:1785, NPAS2:2255, NCOR1:2714, ATF2:2770	0.987627
REACTOME_SEMAPHORIN_INTERACTIONS	0.0353899	0.340157	0.424	0.613361	61	LIMK1:571, SEMA6D:1279, MYL12B:1842, PLXNC1:2152, DPYSL2:2278, RHOB:2344, SEMA4A:2373, PLXNA1:2447, HSP90AB1:2470, MYH14:2640	0.987627
REACTOME_RORA_ACTIVATES_CIRCADIAN_EXPRESSION	0.0523754	0.38493	0.425	0.649856	23	NCOA2:386, SMARCD3:1167, NPAS2:2255, NCOR1:2714, CLOCK:3935, HDAC3:4289, ARNTL:4307, CPT1A:4713, TBL1XR1:5598, NR1D1:5652	0.987627
REACTOME_ACYL_CHAIN_REMODELLING_OF_PI	0.0663237	0.374027	0.426	0.64076	15	PLA2G2E:909, PLA2G12A:925, PLBD1:2754, PLA2G5:3603, PLA2G2A:4523, MBOAT7:4876, PLA2G1B:5142, PLA2G10:5199, PLA2G4D:7415, PLA2G2D:8751	0.987627
REACTOME_PREFOLDIN_MEDIATED_TRANSFER_OF_SUBSTRATE_TO_CCT_TRIC	0.0591766	0.287622	0.432	0.563774	27	CCT8:316, PFDN6:555, PFDN5:682, PFDN1:985, TUBA3C:1449, CCT2:1774, TUBA3D:2247, CCT3:3241, TUBB6:4043, CCT6A:4142	0.987627
REACTOME_DSCAM_INTERACTIONS	0.0883158	0.310618	0.432	0.588446	11	MAPK12:1549, MAPK11:3549, NTN1:3625, MAPK13:3838, PAK1:4031, DSCAM:5381, DCC:7019, MAPK8:11088, RAC1:12490, MAPK14:12697	0.987627
BIOCARTA_RHO_PATHWAY	0.0538396	0.316091	0.432	0.591462	29	LIMK1:571, MYL2:936, ARHGAP1:1331, ARHGEF1:1579, PFN1:1678, ARPC1B:2015, CFL1:3515, ARPC1A:3739, GSN:3891, ARPC2:4016	0.987627
KEGG_GNRH_SIGNALING_PATHWAY	0.0288302	0.333199	0.432	0.609197	95	CACNA1S:585, PLD2:796, PLA2G2E:909, PLA2G12A:925, GRB2:982, CACNA1D:1033, MAP2K2:1377, MAPK12:1549, PLD1:1764, PRKCB:2273	0.987627
REACTOME_RESPONSE_TO_ELEVATED_PLATELET_CYTOSOLIC_CA2_	0.0346623	0.297486	0.434	0.574587	76	ALB:1153, ITGA2B:1181, PLG:1239, F13A1:1294, TF:1487, SERPING1:1591, PFN1:1678, HRG:1690, SCG3:1772, PRKCG:1773	0.987627
REACTOME_SIGNAL_TRANSDUCTION_BY_L1	0.0527836	0.317505	0.434	0.591462	30	CLTA:642, AP2B1:969, AP2A1:1046, ITGA2B:1181, MAP2K2:1377, RPS6KA4:2108, MAP2K1:2673, ITGB3:3262, RPS6KA3:3476, PAK1:4031	0.987627
ST_DIFFERENTIATION_PATHWAY_IN_PC12_CELLS	0.0396798	0.357845	0.435	0.624597	45	CREB1:182, EGR3:219, FRS2:899, MAP1B:1734, CAMP:2346, OPN1LW:2522, ATF1:2908, TH:3055, RPS6KA3:3476, TERF2IP:3649	0.987627
REACTOME_TCA_CYCLE_AND_RESPIRATORY_ELECTRON_TRANSPORT	0.0533238	0.053265	0.442	0.221015	111	ATP5B:143, PDHX:464, CS:494, PDP1:497, DLST:592, DLD:609, UCP2:775, NDUFS7:1107, SUCLG1:1241, COX6B1:1540	0.987627
REACTOME_MITOCHONDRIAL_PROTEIN_IMPORT	0.040222	0.340888	0.442	0.613361	47	ATP5B:143, TOMM40:227, CS:494, SLC25A12:637, COX17:769, DNAJC19:798, HSPD1:1309, ATP5A1:2086, SLC25A6:2105, TOMM70A:2141	0.987627
KEGG_STEROID_HORMONE_BIOSYNTHESIS	0.0743449	0.0884541	0.445	0.295927	44	SULT1E1:728, CYP3A4:773, COMT:1260, UGT2A3:1735, CYP11A1:1991, HSD17B3:2432, HSD17B7:2777, UGT2B11:3063, UGT2A1:3263, CYP7A1:3718	0.987627
KEGG_TASTE_TRANSDUCTION	0.0479543	0.251195	0.445	0.530623	48	TAS1R2:640, TAS2R38:701, SCNN1G:1003, GNAT3:1221, TRPM5:1316, ADCY8:2897, TAS2R50:3205, PRKACB:3730, TAS2R14:4146, SCNN1A:4269	0.987627
REACTOME_SIGNALING_BY_FGFR1_FUSION_MUTANTS	0.0610764	0.369936	0.448	0.636238	18	CPSF6:101, GRB2:982, PLCG1:2586, MYO18A:3899, BCR:4519, TRIM24:5117, FGFR1OP2:5631, ZMYM2:7397, CUX1:7475, PIK3CA:7639	0.987627
KEGG_TYROSINE_METABOLISM	0.0549725	0.223904	0.45	0.494212	41	ADH7:200, ALDH3A1:620, ADH1C:734, COMT:1260, GOT2:1437, ALDH3B2:2113, MIF:2181, TH:3055, GSTZ1:3156, AOC3:3316	0.987627
KEGG_INSULIN_SIGNALING_PATHWAY	0.0205893	0.418102	0.45	0.675517	131	PYGM:93, PRKAA2:95, PRKAB1:115, GYS2:326, EIF4EBP1:375, SLC2A4:785, GCK:914, FLOT2:952, GRB2:982, ACACA:1075	0.987627
REACTOME_L1CAM_INTERACTIONS	0.0369818	0.260187	0.453	0.538928	78	SPTB:40, ANK1:87, ALCAM:416, SPTA1:558, CLTA:642, AP2B1:969, AP2A1:1046, ITGA2B:1181, MAP2K2:1377, CNTNAP1:1501	0.987627
REACTOME_CROSS_PRESENTATION_OF_SOLUBLE_EXOGENOUS_ANTIGENS_ENDOSOMES	0.0428396	0.326264	0.454	0.600617	44	PSMB4:1038, PSMB1:2035, PSME4:2331, PSMC2:2662, PSMA4:2693, PSMC4:2720, PSMA8:3285, PSMC3:3528, PSMB7:3531, PSME2:3813	0.987627
REACTOME_GLYCEROPHOSPHOLIPID_BIOSYNTHESIS	0.0376442	0.240057	0.455	0.51389	82	LPIN3:164, LPCAT4:306, LPGAT1:360, AGPAT9:490, PLD2:796, HADHB:829, PLA2G2E:909, PLA2G12A:925, LPIN2:944, DGAT2:1023	0.987627
REACTOME_AMYLOIDS	0.0386792	0.335511	0.456	0.610803	52	HIST1H2BN:394, SNCA:1686, APCS:1748, HIST1H2BI:1953, HIST1H2AB:1993, HIST1H2BM:1999, H2AFX:2177, HIST1H2BH:2785, SAA1:2866, HIST1H2AD:2968	0.987627
REACTOME_RAF_MAP_KINASE_CASCADE	0.0550985	0.546397	0.459	0.773627	10	MAP2K2:1377, MAP2K1:2673, MAPK3:4496, MAPK1:4578, KRAS:5706, YWHAB:6335, NRAS:11074, CDK1:11895, HRAS:13227, RAF1:16168	0.987627
REACTOME_HORMONE_SENSITIVE_LIPASE_HSL_MEDIATED_TRIACYLGLYCEROL_HYDROLYSIS	0.0645734	0.479635	0.46	0.719365	10	FABP4:83, ABHD5:444, PPP1CA:2620, PRKACB:3730, CAV1:7190, MGLL:9064, PLIN1:10766, PRKACA:10902, PPP1CC:15302, LIPE:16548	0.987627
PID_P38_GAMMA_DELTA_PATHWAY	0.0651211	0.45468	0.461	0.703991	11	PKN1:744, MAPK12:1549, SNTA1:1821, ZAK:2835, MAPK13:3838, MAP2K3:5043, STMN1:7673, MAP2K6:8429, CCND1:17218, EEF2K:18180	0.987627
REACTOME_RNA_POL_I_PROMOTER_OPENING	0.0444625	0.370159	0.462	0.636238	34	HIST1H2BN:394, HIST1H2BI:1953, HIST1H2AB:1993, HIST1H2BM:1999, H2AFX:2177, HIST1H2BH:2785, HIST1H2AD:2968, HIST1H2BO:3482, HIST1H2BC:3777, HIST1H2BK:4380	0.987627
REACTOME_P130CAS_LINKAGE_TO_MAPK_SIGNALING_FOR_INTEGRINS	0.0640189	0.407094	0.463	0.667438	14	ITGA2B:1181, FGB:1930, VWF:2041, ITGB3:3262, FGA:3802, RAP1B:4193, TLN1:4209, FGG:6692, SRC:7776, APBB1IP:8009	0.987627
KEGG_GLYCEROLIPID_METABOLISM	0.0386776	0.349782	0.465	0.620864	49	ALDH1B1:105, ALDH3A2:478, AGPAT9:490, LPL:510, PNLIP:526, PNLIPRP2:539, PNLIPRP1:764, PPAP2B:875, DGAT2:1023, DGKI:2226	0.987627
KEGG_DILATED_CARDIOMYOPATHY	0.0374814	0.231049	0.468	0.503033	86	TTN:69, PLN:363, ITGB6:551, CACNA1S:585, MYL2:936, CACNA1D:1033, SGCD:1096, CACNA2D3:1142, ITGA2B:1181, CACNG5:1223	0.987627
PID_RXR_VDR_PATHWAY	0.0551472	0.330809	0.472	0.605694	26	RARA:270, NR1H4:685, RXRB:959, THRB:2131, ABCA1:2340, VDR:3862, PPARG:3949, RPS6KB1:4751, RARG:5350, SREBF1:5879	0.987627
REACTOME_CA_DEPENDENT_EVENTS	0.0497277	0.389822	0.472	0.653796	25	CREB1:182, PRKCG:1773, PRKAR2B:2282, PRKAR1B:2608, ADCY8:2897, PRKAR1A:3408, PRKACB:3730, ADCY2:4174, ADRBK1:4492, MAPK1:4578	0.987627
BIOCARTA_MPR_PATHWAY	0.043082	0.40693	0.474	0.667438	31	PAQR7:1674, ARPC1B:2015, PRKAR2B:2282, CAP1:2570, PRKAR1B:2608, PRKAR1A:3408, GNAI1:3428, PRKACB:3730, ARPC1A:3739, ARPC2:4016	0.987627
KEGG_GLYCINE_SERINE_AND_THREONINE_METABOLISM	0.0606996	0.242629	0.476	0.517663	31	PHGDH:258, GATM:290, GNMT:399, DLD:609, BHMT:2659, SRR:2742, AOC3:3316, SDS:3450, AOC2:4123, GAMT:4134	0.987627
KEGG_PROXIMAL_TUBULE_BICARBONATE_RECLAMATION	0.0487437	0.45075	0.476	0.702511	20	CA2:910, ATP1A3:1479, SLC4A4:1624, GLS2:1730, ATP1A1:3138, GLS:3279, ATP1B2:5400, ATP1A2:6093, GLUD1:6386, PCK2:6569	0.987627
REACTOME_SEMA3A_PAK_DEPENDENT_AXON_REPULSION	0.0579914	0.452674	0.476	0.703056	14	LIMK1:571, PLXNA1:2447, HSP90AB1:2470, CFL1:3515, FYN:3787, PAK1:4031, PLXNA3:5955, PLXNA2:6969, NRP1:8292, RAC1:12490	0.987627
KEGG_HISTIDINE_METABOLISM	0.055934	0.297634	0.483	0.574587	29	ALDH1B1:105, ALDH3A2:478, ACY3:514, ALDH3A1:620, HDC:808, ALDH3B2:2113, UROC1:3535, HNMT:4517, ALDH3B1:4617, FTCD:4958	0.987627
BIOCARTA_TPO_PATHWAY	0.0604026	0.306072	0.483	0.582951	24	GRB2:982, RASA1:1054, PIK3CG:1731, PRKCB:2273, PLCG1:2586, MAP2K1:2673, MPL:2885, MAPK3:4496, THPO:4966, PRKCA:5812	0.987627
REACTOME_RAP1_SIGNALLING	0.0639227	0.407799	0.488	0.667438	14	RASGRP2:166, SIPA1:2045, PRKACB:3730, RAP1B:4193, RAPGEF4:4262, RAP1GAP2:4677, RAP1GAP:4897, YWHAB:6335, RAPGEF3:9894, RASGRP1:10385	0.987627
PID_EPHRINB_REV_PATHWAY	0.0445413	0.398944	0.49	0.661285	30	TIAM1:289, ITGA2B:1181, FGB:1930, EFNB1:3051, MAP3K7:3192, ITGB3:3262, HCK:3595, FYN:3787, FGA:3802, LCK:5530	0.987627
KEGG_CALCIUM_SIGNALING_PATHWAY	0.0241352	0.279365	0.491	0.558774	171	RYR1:59, RYR3:89, ATP2A1:131, PPID:239, PLN:363, GRM1:534, CACNA1S:585, AVPR1A:722, PPP3CB:816, CACNA1G:975	0.987627
KEGG_STEROID_BIOSYNTHESIS	0.0691305	0.338615	0.491	0.613361	16	DHCR24:16, MSMO1:629, CYP27B1:2171, HSD17B7:2777, CEL:3041, LIPA:6013, SOAT2:6435, LSS:7463, EBP:8936, DHCR7:9747	0.987627
REACTOME_MRNA_SPLICING_MINOR_PATHWAY	0.0570341	0.354763	0.491	0.62408	22	EFTUD2:683, POLR2K:1078, SNRNP40:1728, DDX23:3053, SRSF7:3394, SNRPB:4738, SRSF6:4780, SNRNP200:4782, POLR2A:4880, GTF2F1:4896	0.987627
REACTOME_IRON_UPTAKE_AND_TRANSPORT	0.044353	0.357691	0.495	0.624597	36	FTH1:108, FTL:140, ATP6V0C:499, SLC40A1:1025, ATP6V1A:1469, TF:1487, MCOLN1:1650, STEAP3:2274, TCIRG1:3356, ATP6V1E1:3358	0.987627
REACTOME_LATENT_INFECTION_OF_HOMO_SAPIENS_WITH_MYCOBACTERIUM_TUBERCULOSIS	0.0422942	0.415563	0.495	0.673971	31	ATP6V0C:499, ATP6V1A:1469, CAMP:2346, NOS3:2863, NCF2:2895, TCIRG1:3356, ATP6V1E1:3358, LTF:3472, ATP6V1G3:4019, CYBB:4629	0.987627
PID_LKB1_PATHWAY	0.0386589	0.365113	0.496	0.632903	46	ETV4:71, PRKAA2:95, PRKAB1:115, CREB1:182, MLST8:362, SFN:436, CDC37:653, STRADB:706, MARK4:1091, SMARCD3:1167	0.987627
REACTOME_REGULATION_OF_IFNG_SIGNALING	0.0446975	0.576985	0.496	0.792069	13	SOCS1:1123, PTPN1:2426, PIAS1:3850, JAK1:4573, SUMO1:6056, STAT1:8388, PTPN2:9248, PTPN6:9573, IFNGR1:9643, SOCS3:9709	0.987627
KEGG_SPLICEOSOME	0.0527917	0.0764005	0.497	0.277386	95	ZMAT2:233, SLU7:347, EFTUD2:683, PRPF3:922, SF3A2:932, U2AF2:1245, XAB2:1696, SNRNP40:1728, DDX39B:1932, HSPA2:2360	0.987627
REACTOME_N_GLYCAN_ANTENNAE_ELONGATION	0.0890736	0.248719	0.503	0.526263	14	MGAT4B:169, ST8SIA2:1256, MGAT4A:2664, MGAT5:4612, B4GALT2:5129, ST6GAL1:6200, MGAT4C:6365, B4GALT3:6373, ST8SIA6:7059, ST8SIA3:7745	0.987627
REACTOME_REGULATION_OF_BETA_CELL_DEVELOPMENT	0.049964	0.352187	0.505	0.623429	29	PAX6:448, MAFA:835, GCK:914, AKT2:1353, HNF4A:1586, PKLR:1937, NEUROD1:1945, PTF1A:2019, FOXA2:2986, ONECUT1:3113	0.987627
BIOCARTA_AGPCR_PATHWAY	0.06463	0.438373	0.513	0.690802	12	PRKCB:2273, PRKAR2B:2282, PRKAR1B:2608, PRKAR1A:3408, PRKACB:3730, ARRB1:5195, PRKCA:5812, PRKAR2A:8639, GNB1:8765, GNGT1:16005	0.987627
BIOCARTA_SARS_PATHWAY	0.0549149	0.547735	0.513	0.774342	10	CKM:13, LDHA:2202, LDHB:2690, NCL:5056, ANPEP:7851, FBL:11110, EIF4E:11152, GPT:11603, MAPK14:12697, LDHC:13219	0.987627
REACTOME_ACYL_CHAIN_REMODELLING_OF_PE	0.043212	0.493314	0.518	0.728779	21	LPCAT4:306, PLA2G2E:909, PLA2G12A:925, PLBD1:2754, PLA2G5:3603, PLA2G6:4200, PLA2G2A:4523, PNPLA8:4779, PLA2G1B:5142, PLA2G10:5199	0.987627
REACTOME_P53_DEPENDENT_G1_DNA_DAMAGE_RESPONSE	0.0366985	0.379877	0.519	0.64731	48	PSMB4:1038, PSMB1:2035, PSME4:2331, PSMC2:2662, PSMA4:2693, PSMC4:2720, PSMA8:3285, PSMC3:3528, PSMB7:3531, PSME2:3813	0.987627
REACTOME_PACKAGING_OF_TELOMERE_ENDS	0.0383845	0.452857	0.522	0.703056	32	HIST1H2BN:394, HIST3H3:1092, HIST1H2BI:1953, HIST1H2AB:1993, HIST1H2BM:1999, H2AFX:2177, HIST1H2BH:2785, HIST1H2AD:2968, HIST1H2BO:3482, TERF2IP:3649	0.987627
PID_RAS_PATHWAY	0.0485131	0.358239	0.523	0.624597	30	RASGRP2:166, RASA4:948, GRB2:982, RASA1:1054, RABGEF1:1904, PRKCB:2273, SYNGAP1:2723, RASGRP3:2975, RIN1:3738, LGALS3:5074	0.987627
REACTOME_DEVELOPMENTAL_BIOLOGY	0.0209889	0.171239	0.529	0.428264	371	SPTB:40, FABP4:83, ANK1:87, COL9A1:141, PAK6:171, CREB1:182, SMAD3:271, ACVR2A:337, NCOA2:386, ALCAM:416	0.987627
PID_RETINOIC_ACID_PATHWAY	0.0518714	0.32594	0.529	0.600617	30	RARA:270, NCOA2:386, NRIP1:891, RXRB:959, PRKCG:1773, CDK7:2052, VDR:3862, HDAC3:4289, MAPK3:4496, MAPK1:4578	0.987627
KEGG_N_GLYCAN_BIOSYNTHESIS	0.0517171	0.230757	0.531	0.503033	45	MGAT4B:169, ALG3:311, FUT8:1070, ALG5:1137, TUSC3:1458, MGAT2:2532, MGAT4A:2664, DDOST:3098, STT3A:3163, ALG10:3268	0.987627
KEGG_ABC_TRANSPORTERS	0.046125	0.290533	0.531	0.568608	44	ABCB4:18, ABCA12:103, ABCD3:293, ABCG8:552, ABCB9:705, ABCB11:782, ABCC11:2062, ABCA1:2340, ABCB6:2490, ABCC2:3593	0.987627
REACTOME_MRNA_DECAY_BY_5_TO_3_EXORIBONUCLEASE	0.0668993	0.463954	0.531	0.70925	10	EDC3:2825, LSM1:3927, LSM4:4287, PATL1:4946, DCP1A:6302, DDX6:6362, EDC4:6449, DCP1B:10507, DCP2:14354, XRN1:14898	0.987627
KEGG_DORSO_VENTRAL_AXIS_FORMATION	0.0355763	0.546624	0.531	0.773627	24	SPIRE1:605, GRB2:982, PIWIL1:1517, MAP2K1:2673, SPIRE2:2905, NOTCH3:3242, FMN2:4006, ETV6:4350, MAPK3:4496, MAPK1:4578	0.987627
REACTOME_P53_INDEPENDENT_G1_S_DNA_DAMAGE_CHECKPOINT	0.0369046	0.403125	0.533	0.665625	43	PSMB4:1038, PSMB1:2035, PSME4:2331, PSMC2:2662, PSMA4:2693, PSMC4:2720, PSMA8:3285, PSMC3:3528, PSMB7:3531, PSME2:3813	0.987627
KEGG_RNA_DEGRADATION	0.0401511	0.317447	0.536	0.591462	52	XRN2:286, PAPD7:627, ENO3:988, RQCD1:1089, HSPD1:1309, CNOT4:1780, EDC3:2825, DIS3:2880, EXOSC4:3005, LSM1:3927	0.987627
REACTOME_GABA_B_RECEPTOR_ACTIVATION	0.0416304	0.408401	0.537	0.667438	33	KCNJ3:842, GNG8:2073, GNAL:2484, KCNJ4:2883, ADCY8:2897, KCNJ10:3108, GNAI1:3428, ADCY2:4174, KCNJ9:4244, KCNJ15:4633	0.987627
REACTOME_ADENYLATE_CYCLASE_INHIBITORY_PATHWAY	0.053929	0.500949	0.544	0.734189	13	GNAL:2484, ADCY8:2897, GNAI1:3428, ADCY2:4174, GNAI3:5766, ADCY1:6405, ADCY4:6866, ADCY5:8135, ADCY3:8413, GNAI2:8712	0.987627
REACTOME_TRNA_AMINOACYLATION	0.0412636	0.355524	0.547	0.624121	42	WARS:860, VARS:964, AIMP1:1161, IARS:2119, YARS:2321, QARS:2636, PPA1:2637, CARS2:2808, AARS:2993, DARS:4026	0.987627
PID_RHOA_PATHWAY	0.0308677	0.48437	0.547	0.719797	43	LIMK1:571, PKN1:744, PLD2:796, MYL2:936, MAPK12:1549, PLD1:1764, ATF2:2770, CIT:2906, CFL1:3515, TLN1:4209	0.987627
PID_TCR_RAS_PATHWAY	0.048141	0.533017	0.551	0.76533	14	MAP3K8:1266, PRKCB:2273, MAP2K1:2673, MAPK3:4496, MAPK1:4578, PTPN7:4764, KRAS:5706, PRKCA:5812, BRAF:9647, NRAS:11074	0.987627
KEGG_AMINO_SUGAR_AND_NUCLEOTIDE_SUGAR_METABOLISM	0.0311278	0.480696	0.553	0.719365	43	PGM1:361, GMPPA:453, GCK:914, UXS1:2003, GMPPB:2076, GALE:2397, GALT:2715, NANS:2971, PGM2:2987, GNPNAT1:3329	0.987627
BIOCARTA_MAL_PATHWAY	0.0474509	0.498414	0.555	0.732152	17	MAL:524, LIMK1:571, MAP2K2:1377, MAP2K1:2673, MAP4K2:3768, MAPK3:4496, MAPK1:4578, ROCK1:5422, SRF:5644, ACTA1:10449	0.987627
REACTOME_PLATELET_CALCIUM_HOMEOSTASIS	0.0561068	0.437377	0.556	0.690802	16	ATP2A1:131, STIM1:287, ATP2A3:2387, ORAI1:2627, TRPC7:3135, ATP2A2:3977, SLC8A2:4647, ITPR3:7974, P2RX1:8304, SLC8A3:9562	0.987627
BIOCARTA_CREB_PATHWAY	0.0445093	0.432516	0.557	0.688363	26	CREB1:182, GRB2:982, PRKCB:2273, PRKAR2B:2282, CAMK2G:2546, PRKAR1B:2608, CAMK2A:3139, PRKAR1A:3408, PRKACB:3730, MAPK3:4496	0.987627
KEGG_LONG_TERM_DEPRESSION	0.0252924	0.471868	0.561	0.713855	68	RYR1:59, GRM1:534, PRKG2:700, PLA2G2E:909, PLA2G12A:925, MAP2K2:1377, GRIA2:1682, PRKCG:1773, PPP2CB:2262, PRKCB:2273	0.987627
REACTOME_TRANSPORT_OF_ORGANIC_ANIONS	0.0583207	0.503137	0.562	0.734985	11	SLCO4C1:1051, ALB:1153, SLCO1B1:2487, SLCO1A2:3399, SLCO1B3:3744, SLCO2A1:5859, SLCO2B1:9680, SLCO1C1:12791, SLCO3A1:14352, AVP:14591	0.987627
BIOCARTA_TGFB_PATHWAY	0.046459	0.483517	0.563	0.719365	19	SMAD3:271, SMAD4:2502, MAP2K1:2673, SMAD2:3149, MAP3K7:3192, TGFBR1:3556, MAPK3:4496, ZFYVE9:5858, TAB1:7072, TGFB1:7143	0.987627
REACTOME_DAG_AND_IP3_SIGNALING	0.0415258	0.455556	0.571	0.703991	27	CREB1:182, PRKCG:1773, PRKAR2B:2282, PLCG1:2586, PRKAR1B:2608, ADCY8:2897, PRKAR1A:3408, PRKACB:3730, ADCY2:4174, ADRBK1:4492	0.987627
REACTOME_MAPK_TARGETS_NUCLEAR_EVENTS_MEDIATED_BY_MAP_KINASES	0.0466935	0.384597	0.572	0.649856	29	CREB1:182, DUSP4:376, DUSP7:1900, PPP2CB:2262, PPP2R5D:2596, ATF2:2770, ATF1:2908, RPS6KA3:3476, MAPK11:3549, MAPK9:3782	0.987627
KEGG_GLYCOSAMINOGLYCAN_BIOSYNTHESIS_CHONDROITIN_SULFATE	0.0434875	0.480441	0.574	0.719365	22	CHPF:50, CHSY3:1117, B3GAT2:1248, CSGALNACT1:2303, XYLT1:3459, B3GAT3:3579, DSE:3867, CHST14:4915, B3GALT6:5115, CHST11:5587	0.987627
REACTOME_PYRIMIDINE_CATABOLISM	0.0553156	0.525388	0.576	0.75784	11	NT5C1A:2856, DPYD:3564, UPP2:4871, NT5E:4924, UPB1:4936, AGXT2:6831, TYMP:7501, NT5M:8359, DPYS:10081, NT5C:14405	0.987627
REACTOME_SEMA4D_INDUCED_CELL_MIGRATION_AND_GROWTH_CONE_COLLAPSE	0.0373691	0.553571	0.58	0.778011	21	LIMK1:571, MYL12B:1842, RHOB:2344, MYH14:2640, RND1:3639, MYH11:4748, ROCK1:5422, ROCK2:7199, MYH9:7900, LIMK2:7905	0.987627
BIOCARTA_EIF_PATHWAY	0.0456207	0.569143	0.581	0.78634	13	EIF6:626, EIF2S3:1671, EIF3A:2163, EIF4A2:3509, EIF4G1:3726, EIF2S1:7219, EIF4G3:8375, EEF2:9342, EIF4E:11152, EIF5:12252	0.987627
REACTOME_GAP_JUNCTION_ASSEMBLY	0.0596741	0.381026	0.585	0.647965	18	GJA1:763, GJB4:934, GJC2:1020, GJB3:2289, GJB6:2876, GJC1:3490, GJD2:4495, GJA10:6008, GJA4:8076, GJB2:9912	0.987627
REACTOME_METABOLISM_OF_CARBOHYDRATES	0.0155985	0.422152	0.585	0.680342	227	SLC25A11:3, TKT:39, PFKM:48, CHPF:50, PYGM:93, GYS2:326, PGM1:361, SLC25A12:637, AMY2A:662, HS3ST3B1:712	0.987627
KEGG_GLYCEROPHOSPHOLIPID_METABOLISM	0.0228299	0.495424	0.586	0.730279	75	LYPLA2:210, LPCAT4:306, LPGAT1:360, AGPAT9:490, PLD2:796, PPAP2B:875, PLA2G2E:909, PLA2G12A:925, GPD1:1505, PLD1:1764	0.987627
REACTOME_ADHERENS_JUNCTIONS_INTERACTIONS	0.052089	0.349275	0.587	0.620826	27	JUP:291, CDH11:536, PVRL3:714, CDH6:956, CDH9:1541, CDH12:2300, CDH24:2509, CTNNB1:2854, CTNND1:3372, CDH18:4358	0.987627
PID_AJDISS_2PATHWAY	0.030615	0.478061	0.588	0.719365	45	TIAM1:289, JUP:291, RAB7A:549, ADAM10:717, RIN2:1744, MMP3:2080, PTPN1:2426, CABLES1:2791, CTNNB1:2854, BDNF:3000	0.987627
BIOCARTA_CDK5_PATHWAY	0.0677811	0.436466	0.593	0.690709	11	MAP2K2:1377, MAP2K1:2673, CDK5R1:3280, MAPK3:4496, MAPK1:4578, EGR1:5339, NGFR:5820, NGF:11301, HRAS:13227, CDK5:14790	0.987627
REACTOME_UNWINDING_OF_DNA	0.0643643	0.45994	0.593	0.706494	11	MCM4:923, CDC45:4093, GINS1:5053, MCM2:5423, MCM6:6117, MCM3:6881, MCM7:8871, GINS4:9339, GINS2:10404, MCM5:11512	0.987627
REACTOME_APOPTOTIC_CLEAVAGE_OF_CELL_ADHESION_PROTEINS	0.0751704	0.367414	0.594	0.635393	12	PKP1:431, DSG1:632, CTNNB1:2854, LOC647859:4266, TJP2:4990, DSG2:5683, CASP3:7509, DSP:9465, OCLN:11137, DSG3:11898	0.987627
KEGG_VIBRIO_CHOLERAE_INFECTION	0.0354927	0.38612	0.596	0.651004	50	ATP6V0C:499, MUC2:542, ATP6V1A:1469, ERO1L:1642, PRKCG:1773, PRKCB:2273, PLCG1:2586, PDIA4:2605, TCIRG1:3356, ATP6V1E1:3358	0.987627
PID_WNT_CANONICAL_PATHWAY	0.0368182	0.568913	0.601	0.78634	20	DVL3:1547, CUL3:2518, CTNNB1:2854, LRP6:3979, FZD5:4412, RANBP3:4718, PIP5K1B:5549, DVL1:6236, NKD2:6654, KLHL12:6657	0.987627
REACTOME_TRANSFERRIN_ENDOCYTOSIS_AND_RECYCLING	0.0425264	0.462092	0.605	0.708098	25	ATP6V0C:499, ATP6V1A:1469, TF:1487, MCOLN1:1650, STEAP3:2274, TCIRG1:3356, ATP6V1E1:3358, ATP6V1G3:4019, ATP6V0A2:5169, ATP6V0D2:6424	0.987627
BIOCARTA_AHSP_PATHWAY	0.0388195	0.628073	0.605	0.827668	13	HBA2:265, CPOX:1865, UROD:3074, HBA1:3663, AHSP:4634, HBB:5046, HMBS:5431, ALAD:8412, ALAS2:10230, ALAS1:12828	0.987627
REACTOME_ACTIVATION_OF_CHAPERONES_BY_ATF6_ALPHA	0.0540134	0.535184	0.608	0.766777	11	HSP90B1:269, XBP1:611, ATF4:2851, MBTPS2:3023, NFYA:7118, DDIT3:9563, NFYB:10289, CALR:11241, HSPA5:11910, MBTPS1:13984	0.987627
BIOCARTA_GLYCOLYSIS_PATHWAY	0.0544253	0.55131	0.608	0.777205	10	PKLR:1937, TPI1:1989, PGK1:2842, GAPDH:4746, ENO1:5131, ALDOB:7034, HK1:9814, PGAM1:11420, GPI:16111, PFKL:17334	0.987627
REACTOME_PRE_NOTCH_PROCESSING_IN_GOLGI	0.0423558	0.557682	0.609	0.780153	16	ATP2A1:131, ATP2A3:2387, TMED2:2523, NOTCH3:3242, ATP2A2:3977, RAB6A:5093, FURIN:7153, ST3GAL3:7465, ST3GAL6:7557, SEL1L:8489	0.987627
BIOCARTA_SALMONELLA_PATHWAY	0.0478394	0.600486	0.609	0.810751	10	WASF1:292, ARPC1B:2015, ARPC1A:3739, ARPC2:4016, ACTR3:6450, ARPC5:9083, ACTA1:10449, RAC1:12490, ARPC3:12871, WASL:18147	0.987627
REACTOME_INWARDLY_RECTIFYING_K_CHANNELS	0.0390842	0.490682	0.612	0.7258	26	KCNJ3:842, GNG8:2073, KCNJ4:2883, KCNJ10:3108, KCNJ1:3680, KCNJ9:4244, KCNJ14:4568, KCNJ15:4633, KCNJ6:4721, KCNJ2:4881	0.987627
BIOCARTA_TCRA_PATHWAY	0.0586711	0.481748	0.615	0.719365	12	ZAP70:1072, FYN:3787, HLA-DRA:4318, LCK:5530, TRA@:6168, HLA-DRB1:6551, PTPRC:7088, CD247:7416, CD3E:10351, CD3G:11909	0.987627
BIOCARTA_GPCR_PATHWAY	0.0319917	0.544616	0.615	0.772496	30	CREB1:182, PPP3CB:816, PRKCB:2273, PRKAR2B:2282, PLCG1:2586, PRKAR1B:2608, MAP2K1:2673, NFATC4:2763, PRKAR1A:3408, GNAI1:3428	0.987627
KEGG_VEGF_SIGNALING_PATHWAY	0.0177179	0.604132	0.615	0.810751	72	PPP3CB:816, PLA2G2E:909, PLA2G12A:925, AKT2:1353, MAP2K2:1377, MAPK12:1549, PIK3CG:1731, PRKCG:1773, BAD:2160, PRKCB:2273	0.987627
REACTOME_METABOLISM_OF_STEROID_HORMONES_AND_VITAMINS_A_AND_D	0.0462882	0.343875	0.616	0.614646	35	PNLIP:526, CYP2R1:770, CLPS:858, CYP11A1:1991, CYP27B1:2171, HSD17B3:2432, STARD4:2747, RBP2:3204, LRAT:4143, STAR:4154	0.987627
KEGG_PURINE_METABOLISM	0.0177707	0.458057	0.616	0.705176	148	AK5:9, AMPD3:62, ADSS:99, ADK:208, PRHOXNB:324, XDH:487, PAPSS2:724, GMPS:811, HPRT1:1034, POLR2K:1078	0.987627
PID_ERA_GENOMIC_PATHWAY	0.0214641	0.56611	0.619	0.785547	60	NCOA2:386, XBP1:611, NRIP1:891, CD82:892, APBB1:1360, HSF2:1371, TFF1:1443, TRIM59:1536, SOD1:1824, SRA1:2298	0.987627
REACTOME_DOWNREGULATION_OF_SMAD2_3_SMAD4_TRANSCRIPTIONAL_ACTIVITY	0.0414339	0.578655	0.623	0.792627	15	SMAD3:271, SMAD4:2502, NCOR1:2714, SMAD2:3149, SMURF2:4444, HDAC1:5302, NCOR2:6164, TGIF2:8197, TRIM33:8394, USP9X:8943	0.987627
PID_SMAD2_3PATHWAY	0.0420342	0.560676	0.625	0.782254	16	SMAD3:271, CTDSPL:726, CTDSP1:2457, SMAD4:2502, SMAD2:3149, MAPK3:4496, MAPK1:4578, CTDSP2:6088, TGFBRAP1:6833, NUP153:8233	0.987627
REACTOME_ORGANIC_CATION_ANION_ZWITTERION_TRANSPORT	0.0510842	0.523802	0.626	0.756406	13	SLC22A6:397, SLC22A7:885, SLC22A5:929, SLC22A8:1031, SLC22A11:5793, SLC22A4:5971, SLC22A12:6254, SLC22A18:8478, SLC22A2:11923, SLC22A3:13166	0.987627
REACTOME_ION_CHANNEL_TRANSPORT	0.0247679	0.533575	0.636	0.76533	53	ATP11B:56, ATP2A1:131, GLRA1:215, GABRA1:462, ATP11C:1170, ATP1A3:1479, HTR3C:1966, ATP2A3:2387, GLRA3:2628, ATP1A1:3138	0.987627
KEGG_AXON_GUIDANCE	0.022873	0.381275	0.643	0.647965	124	EPHA3:84, PAK6:171, EPHB6:232, LIMK1:571, PPP3CB:816, EPHA7:852, SLIT3:990, RASA1:1054, SRGAP2:1128, EPHA6:1179	0.987627
REACTOME_RESPIRATORY_ELECTRON_TRANSPORT_ATP_SYNTHESIS_BY_CHEMIOSMOTIC_COUPLING_AND_HEAT_PRODUCTION_BY_UNCOUPLING_PROTEINS_	0.0428513	0.200703	0.644	0.468808	75	ATP5B:143, UCP2:775, NDUFS7:1107, COX6B1:1540, NDUFB2:1767, ATP5A1:2086, SDHB:2284, NDUFV1:2573, ATP5C1:2585, NDUFA2:2601	0.987627
REACTOME_INTEGRATION_OF_ENERGY_METABOLISM	0.0205787	0.465924	0.645	0.710525	106	STX1A:30, TKT:39, PRKAA2:95, PAX6:448, ACACA:1075, SPCS2:1302, KCNC2:1506, CACNB3:1883, PKLR:1937, ACACB:1985	0.987627
REACTOME_SYNTHESIS_OF_VERY_LONG_CHAIN_FATTY_ACYL_COAS	0.0456303	0.554592	0.647	0.778011	14	ELOVL4:1005, ACSL4:2555, ACSL3:2623, ELOVL1:2743, HSD17B12:6436, ACSL5:7148, ACSL1:7504, ACSL6:8551, ELOVL7:9346, ELOVL5:10595	0.987627
REACTOME_SIGNALLING_TO_P38_VIA_RIT_AND_RIN	0.0313163	0.674674	0.647	0.859873	15	MAP2K2:1377, MAP2K1:2673, MAPK3:4496, MAPK1:4578, RIT2:4975, KRAS:5706, YWHAB:6335, RIT1:8476, BRAF:9647, NTRK1:10083	0.987627
KEGG_PORPHYRIN_AND_CHLOROPHYLL_METABOLISM	0.0337105	0.503218	0.648	0.734985	33	FTH1:108, BLVRB:884, UGT2A3:1735, CPOX:1865, UGT2B11:3063, UROD:3074, UGT2A1:3263, MMAB:3699, EPRS:4462, COX10:4577	0.987627
REACTOME_ION_TRANSPORT_BY_P_TYPE_ATPASES	0.0311886	0.541904	0.649	0.771776	32	ATP11B:56, ATP2A1:131, ATP11C:1170, ATP1A3:1479, ATP2A3:2387, ATP1A1:3138, ATP7B:3247, ATP2A2:3977, ATP11A:4188, ATP8B1:4332	0.987627
REACTOME_FACILITATIVE_NA_INDEPENDENT_GLUCOSE_TRANSPORTERS	0.0455594	0.584875	0.651	0.798925	12	SLC2A4:785, SLC2A7:924, SLC2A1:3096, SLC2A9:5204, SLC2A8:5742, SLC2A2:6905, SLC2A3:7381, SLC2A11:9050, SLC2A5:12545, SLC2A10:12917	0.987627
BIOCARTA_LYM_PATHWAY	0.0608765	0.505143	0.655	0.736646	10	ICAM1:2042, ITGB2:2745, VCAM1:2837, CD34:3594, ITGB1:8088, ITGA4:9062, IL8:9289, ITGAL:9715, SELL:12030, IL1A:16928	0.987627
BIOCARTA_CSK_PATHWAY	0.0272995	0.657809	0.655	0.85112	22	ZAP70:1072, PRKAR2B:2282, PRKAR1B:2608, PRKAR1A:3408, PRKACB:3730, HLA-DRA:4318, LCK:5530, TRA@:6168, ADCY1:6405, HLA-DRB1:6551	0.987627
KEGG_VIRAL_MYOCARDITIS	0.0258618	0.461952	0.657	0.708098	68	MYH4:20, MYH13:45, MYH1:46, MYH2:298, MYH8:654, SGCD:1096, MYH7B:1231, HLA-DPB1:1311, MYH6:1569, ICAM1:2042	0.987627
BIOCARTA_AKAPCENTROSOME_PATHWAY	0.036672	0.660144	0.659	0.853048	12	PKN1:744, PRKAG1:2253, PRKAR2B:2282, PPP1CA:2620, PRKACB:3730, NUP85:8012, PRKAR2A:8639, PCNT:9809, CDK1:11895, AKAP9:14574	0.987627
KEGG_PATHOGENIC_ESCHERICHIA_COLI_INFECTION	0.0169738	0.678528	0.661	0.861986	50	TUBA3E:1201, NCK1:1273, TUBA3C:1449, LY96:1688, TUBA8:1871, ARPC1B:2015, TUBA3D:2247, ARPC5L:2323, CTNNB1:2854, YWHAQ:3620	0.987627
REACTOME_ENDOGENOUS_STEROLS	0.0436796	0.558246	0.667	0.780153	15	CYP11A1:1991, CYP46A1:2869, CYP7A1:3718, CYP11B2:4284, CYP27A1:4638, CYP11B1:4729, CYP17A1:4968, CYP8B1:7202, CYP7B1:7476, CYP19A1:10657	0.987627
REACTOME_REGULATION_OF_RHEB_GTPASE_ACTIVITY_BY_AMPK	0.0448647	0.623329	0.668	0.825216	10	PRKAA2:95, PRKAB1:115, PRKAG3:1934, PRKAA1:2006, PRKAG1:2253, PRKAB2:8245, PRKAG2:15675, RHEB:16067, TSC2:17785, TSC1:18678	0.987627
REACTOME_PLATELET_ADHESION_TO_EXPOSED_COLLAGEN	0.0433733	0.618516	0.669	0.822867	11	GP1BA:887, COL1A2:1291, VWF:2041, GP9:3387, FYN:3787, COL1A1:7263, ITGB1:8088, LYN:14620, ITGA2:14689, FCER1G:15080	0.987627
REACTOME_INHIBITION_OF_VOLTAGE_GATED_CA2_CHANNELS_VIA_GBETA_GAMMA_SUBUNITS	0.0334968	0.604275	0.67	0.810751	20	KCNJ3:842, GNG8:2073, KCNJ4:2883, KCNJ10:3108, KCNJ9:4244, KCNJ15:4633, KCNJ6:4721, KCNJ2:4881, KCNJ16:5494, KCNJ12:5936	0.987627
BIOCARTA_ARENRF2_PATHWAY	0.0375189	0.652805	0.671	0.849577	12	CREB1:182, PRKCB:2273, KEAP1:2559, MAPK1:4578, PRKCA:5812, JUN:6915, MAFG:8933, MAPK8:11088, FOS:11417, MAPK14:12697	0.987627
REACTOME_BMAL1_CLOCK_NPAS2_ACTIVATES_CIRCADIAN_EXPRESSION	0.0216777	0.657562	0.672	0.85112	35	NCOA2:386, NAMPT:801, SMARCD3:1167, CCRN4L:1754, NPAS2:2255, NCOR1:2714, CLOCK:3935, HDAC3:4289, ARNTL:4307, NR3C1:4325	0.987627
BIOCARTA_NO1_PATHWAY	0.0276208	0.626205	0.673	0.826827	26	PRKG2:700, PRKAR2B:2282, PRKAR1B:2608, NOS3:2863, TNNI1:3111, CHRNA1:3405, PRKAR1A:3408, PRKACB:3730, BDKRB2:3806, CHRM1:6660	0.987627
REACTOME_CRMPS_IN_SEMA3A_SIGNALING	0.0361036	0.640123	0.674	0.837336	14	DPYSL2:2278, PLXNA1:2447, CDK5R1:3280, FYN:3787, PLXNA3:5955, DPYSL4:6868, PLXNA2:6969, DPYSL3:7913, NRP1:8292, DPYSL5:10440	0.987627
REACTOME_ANTIGEN_PROCESSING_CROSS_PRESENTATION	0.0150899	0.672351	0.678	0.858406	66	PSMB4:1038, PSMB1:2035, PSME4:2331, PSMC2:2662, PSMA4:2693, PSMC4:2720, NCF2:2895, PSMA8:3285, PSMC3:3528, PSMB7:3531	0.987627
PID_S1P_S1P4_PATHWAY	0.0436207	0.600952	0.681	0.810751	12	S1PR5:856, PLCG1:2586, GNAI1:3428, MAPK3:4496, MAPK1:4578, GNAI3:5766, GNA12:8358, GNAI2:8712, S1PR4:11444, GNAZ:12904	0.987627
KEGG_TAURINE_AND_HYPOTAURINE_METABOLISM	0.0286326	0.753943	0.682	0.901463	10	GGT7:597, ADO:741, GAD1:1477, GAD2:1523, CSAD:9553, GGT5:11362, CDO1:12185, BAAT:13355, GGT1:15734, GGT6:17805	0.987627
PID_ALPHA_SYNUCLEIN_PATHWAY	0.024764	0.622881	0.684	0.825216	33	PLD2:796, SNCA:1686, PLD1:1764, BAD:2160, PPP2R5D:2596, TH:3055, HCK:3595, FYN:3787, KLK6:4254, MAPK3:4496	0.987627
REACTOME_CD28_DEPENDENT_PI3K_AKT_SIGNALING	0.0326644	0.604574	0.685	0.810751	21	MLST8:362, MAP3K8:1266, THEM4:1314, AKT2:1353, TRIB3:3439, PIK3R2:3688, FYN:3787, PIK3R3:4136, LCK:5530, MAPKAP1:6372	0.987627
BIOCARTA_ECM_PATHWAY	0.0251775	0.676191	0.688	0.859873	23	MYL2:936, PFN1:1678, PIK3CG:1731, MAP2K1:2673, FYN:3787, GSN:3891, TLN1:4209, MAPK3:4496, MAPK1:4578, ROCK1:5422	0.987627
KEGG_ARRHYTHMOGENIC_RIGHT_VENTRICULAR_CARDIOMYOPATHY_ARVC	0.0236336	0.489204	0.689	0.724453	72	JUP:291, ITGB6:551, CACNA1S:585, GJA1:763, CACNA1D:1033, SGCD:1096, CACNA2D3:1142, ITGA2B:1181, CACNG5:1223, CACNB3:1883	0.987627
REACTOME_ABCA_TRANSPORTERS_IN_LIPID_HOMEOSTASIS	0.0394386	0.585128	0.69	0.798925	16	ABCA12:103, ABCD3:293, ABCG8:552, PEX3:2239, ABCG4:5089, ABCA3:6814, ABCG5:6945, ABCG1:7585, ABCA9:9088, ABCD2:9254	0.987627
REACTOME_CELL_EXTRACELLULAR_MATRIX_INTERACTIONS	0.0366197	0.63535	0.693	0.832797	14	TESK1:1568, PARVB:2106, ACTN1:2538, LIMS1:3223, PARVA:4423, LIMS3:5628, VASP:7402, FBLIM1:7811, ITGB1:8088, FERMT2:10309	0.987627
BIOCARTA_UCALPAIN_PATHWAY	0.0303343	0.665172	0.694	0.855776	17	CAPN1:153, CAPNS2:1885, CAPNS1:1916, ACTN1:2538, ITGB3:3262, TLN1:4209, EZR:4747, SRC:7776, ITGB1:8088, ITGA1:9192	0.987627
REACTOME_CTNNB1_PHOSPHORYLATION_CASCADE	0.0294025	0.703388	0.697	0.868607	14	PPP2R5B:1858, PPP2CB:2262, FRAT1:2271, PPP2R5E:2297, PPP2R5D:2596, CTNNB1:2854, PPP2R1B:5847, PPP2R1A:8370, AXIN1:9560, PPP2R5A:12608	0.987627
REACTOME_ACTIVATION_OF_NMDA_RECEPTOR_UPON_GLUTAMATE_BINDING_AND_POSTSYNAPTIC_EVENTS	0.0239808	0.628847	0.7	0.827668	34	NEFL:25, CREB1:182, GRIA4:1486, GRIA2:1682, GRIN2B:2308, GRIN2C:2618, GRIN1:2797, ADCY8:2897, CAMK2A:3139, GRIA1:3386	0.987627
REACTOME_SYNTHESIS_SECRETION_AND_INACTIVATION_OF_GIP	0.038113	0.634342	0.703	0.83233	13	PAX6:448, SPCS2:1302, FFAR1:2100, SPCS3:4130, SEC11C:7694, DPP4:7708, PCSK1:8424, SPCS1:10108, SEC11A:10942, GPR119:12104	0.987627
REACTOME_SIGNALING_BY_FGFR1_MUTANTS	0.0231817	0.665992	0.706	0.855776	29	CPSF6:101, FGF9:843, GRB2:982, PLCG1:2586, FGF8:2731, FGF20:3314, MYO18A:3899, BCR:4519, FGF6:4535, TRIM24:5117	0.987627
KEGG_NEUROACTIVE_LIGAND_RECEPTOR_INTERACTION	0.0105587	0.555959	0.71	0.779075	268	TAAR2:57, MC5R:79, MTNR1A:187, GLRA1:215, TAAR5:300, GRIN3B:323, SSTR4:338, HRH3:419, GABRA1:462, PRSS3:504	0.987627
REACTOME_CIRCADIAN_REPRESSION_OF_EXPRESSION_BY_REV_ERBA	0.0250538	0.684373	0.717	0.863405	22	NCOA2:386, SMARCD3:1167, NPAS2:2255, NCOR1:2714, CLOCK:3935, HDAC3:4289, ARNTL:4307, TBL1XR1:5598, NR1D1:5652, NCOA1:6681	0.987627
REACTOME_NEUROTRANSMITTER_RECEPTOR_BINDING_AND_DOWNSTREAM_TRANSMISSION_IN_THE_POSTSYNAPTIC_CELL	0.0206153	0.430037	0.718	0.688363	124	NEFL:25, MYO6:55, CREB1:182, GABRA1:462, KCNJ3:842, AP2B1:969, AP2A1:1046, GRIA4:1486, GRIA2:1682, PRKCG:1773	0.987627
REACTOME_NUCLEAR_EVENTS_KINASE_AND_TRANSCRIPTION_FACTOR_ACTIVATION	0.0299966	0.61876	0.721	0.822867	23	CREB1:182, DUSP4:376, DUSP7:1900, PPP2CB:2262, PPP2R5D:2596, ATF1:2908, RPS6KA3:3476, MAPK11:3549, MAPK3:4496, MAPK1:4578	0.987627
REACTOME_SPHINGOLIPID_DE_NOVO_BIOSYNTHESIS	0.028073	0.594977	0.723	0.809694	30	PPAP2B:875, PPM1L:926, SGMS1:1326, ACER1:1673, SGPP2:2070, SPTLC2:2576, DEGS2:2784, ACER3:3481, SPTLC1:5293, PPAP2C:5693	0.987627
BIOCARTA_BARRESTIN_SRC_PATHWAY	0.0248244	0.739339	0.723	0.891392	15	MAP2K2:1377, MAP2K1:2673, HCK:3595, MAPK3:4496, MAPK1:4578, ARRB1:5195, DNM1:5715, ADCY1:6405, SRC:7776, GNB1:8765	0.987627
REACTOME_BIOSYNTHESIS_OF_THE_N_GLYCAN_PRECURSOR_DOLICHOL_LIPID_LINKED_OLIGOSACCHARIDE_LLO_AND_TRANSFER_TO_A_NASCENT_PROTEIN	0.0221532	0.690576	0.726	0.866951	27	ALG3:311, GMPPA:453, ALG5:1137, GMPPB:2076, ALG10:3268, GNPNAT1:3329, GFPT2:3416, DOLK:3932, DPM1:4545, ALG10B:5088	0.987627
KEGG_SNARE_INTERACTIONS_IN_VESICULAR_TRANSPORT	0.0161011	0.738457	0.726	0.891169	36	STX1A:30, STX11:32, VAMP8:1150, SNAP23:1808, VAMP3:1823, VAMP2:2195, VTI1B:3576, STX3:5134, VTI1A:5358, GOSR1:5449	0.987627
REACTOME_MRNA_DECAY_BY_3_TO_5_EXORIBONUCLEASE	0.0371405	0.669817	0.73	0.857163	11	DIS3:2880, EXOSC4:3005, EXOSC6:5630, EXOSC1:5860, EXOSC7:6873, EXOSC5:7372, EXOSC2:8934, EXOSC3:9502, EXOSC8:9810, DCPS:11558	0.987627
PID_INTEGRIN2_PATHWAY	0.0348424	0.516478	0.733	0.748217	29	GP1BA:887, ITGAM:1004, FGB:1930, ICAM1:2042, ICAM3:2706, ITGB2:2745, VCAM1:2837, FCGR2A:3792, FGA:3802, SPON2:5234	0.987627
REACTOME_SEMA4D_IN_SEMAPHORIN_SIGNALING	0.0226533	0.689542	0.733	0.866505	26	LIMK1:571, MYL12B:1842, RHOB:2344, MYH14:2640, ARHGAP35:3577, RND1:3639, MYH11:4748, ROCK1:5422, PTPRC:7088, ROCK2:7199	0.987627
PID_ERBB2_ERBB3_PATHWAY	0.0228842	0.604159	0.734	0.810751	43	NF2:202, PPP3CB:816, GRB2:982, MAP2K2:1377, BAD:2160, CHRNE:2254, MAP2K1:2673, NFATC4:2763, CHRNA1:3405, PIK3R2:3688	0.987627
REACTOME_PLATELET_AGGREGATION_PLUG_FORMATION	0.0199906	0.687003	0.734	0.865867	34	RASGRP2:166, GP1BA:887, GRB2:982, ITGA2B:1181, FGB:1930, VWF:2041, PTPN1:2426, MPL:2885, ITGB3:3262, GP9:3387	0.987627
PID_VEGFR1_PATHWAY	0.0271443	0.632172	0.735	0.830334	26	RASA1:1054, NCK1:1273, NRP2:1590, PRKCB:2273, VEGFB:2349, PLCG1:2586, NOS3:2863, MAPK3:4496, MAPK1:4578, HIF1A:5036	0.987627
REACTOME_PPARA_ACTIVATES_GENE_EXPRESSION	0.0130545	0.649947	0.739	0.847583	102	ABCB4:18, SLC27A1:22, TEAD2:63, NCOA2:386, CDK8:1012, SMARCD3:1167, MED15:1173, FABP1:1352, HMGCR:1535, ACADM:1717	0.987627
PID_ERBB1_RECEPTOR_PROXIMAL_PATHWAY	0.0169204	0.729341	0.739	0.884476	35	GRB2:982, RASA1:1054, NCK1:1273, PTPN1:2426, PLCG1:2586, GNAI1:3428, PIK3R2:3688, GSN:3891, PIK3CB:3918, PAK1:4031	0.987627
REACTOME_INTEGRIN_ALPHAIIB_BETA3_SIGNALING	0.0204219	0.718752	0.74	0.878394	26	RASGRP2:166, GRB2:982, ITGA2B:1181, FGB:1930, VWF:2041, PTPN1:2426, ITGB3:3262, FGA:3802, RAP1B:4193, TLN1:4209	0.987627
BIOCARTA_AKAP95_PATHWAY	0.034888	0.702519	0.741	0.868607	10	PRKAG1:2253, PRKAR2B:2282, PPP1CA:2620, PRKACB:3730, PRKAR2A:8639, AKAP8:9172, DDX5:10716, CDK1:11895, NCAPD2:12711, CCNB1:17419	0.987627
BIOCARTA_RAB_PATHWAY	0.0337006	0.712185	0.743	0.873486	10	RAB7A:549, RAB2A:1328, RAB4A:3914, RAB27A:4113, RAB6A:5093, ACTA1:10449, RAB3A:11662, RAB8A:12753, RAB5A:15492, RAB9A:16972	0.987627
REACTOME_SOS_MEDIATED_SIGNALLING	0.0261132	0.735246	0.746	0.888973	14	GRB2:982, MAP2K2:1377, MAP2K1:2673, MAPK3:4496, MAPK1:4578, IRS2:4743, KRAS:5706, YWHAB:6335, NRAS:11074, CDK1:11895	0.987627
REACTOME_ENERGY_DEPENDENT_REGULATION_OF_MTOR_BY_LKB1_AMPK	0.0242876	0.728956	0.747	0.884476	17	PRKAA2:95, PRKAB1:115, STRADB:706, CAB39L:1620, PRKAG3:1934, PRKAA1:2006, PRKAG1:2253, CAB39:2550, PRKAB2:8245, STRADA:8473	0.987627
REACTOME_TRYPTOPHAN_CATABOLISM	0.044553	0.609001	0.748	0.815382	11	CCBL1:2812, HAAO:4021, CCBL2:4394, KYNU:4834, TDO2:5460, ACMSD:5755, IDO2:6207, AADAT:8860, IDO1:10074, KMO:17362	0.987627
REACTOME_ABC_FAMILY_PROTEINS_MEDIATED_TRANSPORT	0.0247292	0.628661	0.748	0.827668	32	ABCA12:103, ABCD3:293, ABCG8:552, ABCC11:2062, PEX3:2239, ABCB6:2490, ABCC2:3593, CFTR:4216, ABCG4:5089, ABCC8:5300	0.987627
BIOCARTA_EIF4_PATHWAY	0.0272565	0.651157	0.748	0.848297	23	EIF4EBP1:375, PRKCB:2273, MKNK1:2864, EIF4A2:3509, EIF4G1:3726, MAPK3:4496, MAPK1:4578, RPS6KB1:4751, PABPC1:5741, PRKCA:5812	0.987627
REACTOME_SYNTHESIS_OF_PC	0.0261814	0.700727	0.75	0.868607	18	LPIN3:164, LPIN2:944, SLC44A2:2830, SLC44A4:3803, SLC44A1:3834, PCYT1A:4127, PEMT:5987, PHOSPHO1:6147, CHAT:6923, CHPT1:7725	0.987627
REACTOME_IL1_SIGNALING	0.0140577	0.770651	0.751	0.909583	36	PELI2:591, IL1RN:830, MAP3K8:1266, IL1RAP:1495, IKBKB:1992, MAP2K1:2673, TAB3:3095, MAP3K7:3192, TMEM189-UBE2V1:3524, PELI1:3606	0.987627
PID_NEPHRIN_NEPH1_PATHWAY	0.0224041	0.666273	0.752	0.855776	31	GRB2:982, NCK1:1273, BAD:2160, PLCG1:2586, KIRREL:2865, PIK3R2:3688, MAPK9:3782, FYN:3787, MAPK10:3915, PIK3CB:3918	0.987627
REACTOME_MHC_CLASS_II_ANTIGEN_PRESENTATION	0.0130031	0.688502	0.752	0.866505	80	KIF5A:161, KIF2A:382, RAB7A:549, DYNC1I1:616, CLTA:642, KIF5B:771, AP2B1:969, AP2A1:1046, DYNC1LI2:1215, HLA-DPB1:1311	0.987627
PID_INTEGRIN5_PATHWAY	0.0244389	0.727334	0.752	0.884428	17	ITGB6:551, EDIL3:1551, VTN:2552, VCAM1:2837, FBN1:3443, TGFBR1:3556, PLAUR:5895, SDC1:5907, ITGA4:9062, CYR61:9684	0.987627
REACTOME_GABA_RECEPTOR_ACTIVATION	0.0215147	0.610441	0.754	0.815751	47	GABRA1:462, KCNJ3:842, GNG8:2073, GNAL:2484, KCNJ4:2883, ADCY8:2897, KCNJ10:3108, GNAI1:3428, ADCY2:4174, KCNJ9:4244	0.987627
BIOCARTA_ERK5_PATHWAY	0.0252245	0.718936	0.76	0.878394	17	CREB1:182, GRB2:982, PIK3CG:1731, PLCG1:2586, MAPK3:4496, MAPK1:4578, MAPK7:5785, PIK3CA:7639, RPS6KA1:8488, PIK3R1:9282	0.987627
REACTOME_NEPHRIN_INTERACTIONS	0.0277348	0.675747	0.761	0.859873	19	MAGI2:318, NCK1:1273, ACTN1:2538, PIK3R2:3688, FYN:3787, PIK3CB:3918, CD2AP:5658, SPTBN1:6198, PIK3CA:7639, KIRREL3:7778	0.987627
REACTOME_METABOLISM_OF_VITAMINS_AND_COFACTORS	0.0168828	0.680156	0.765	0.86236	50	NAMPT:801, MOCS1:1218, CYB5A:1605, ENPP1:1727, GPHN:1840, AASDHPPT:2096, MTHFD1:2224, GSTO1:2466, RFK:2524, SLC2A1:3096	0.987627
PID_EPHB_FWD_PATHWAY	0.0182216	0.697884	0.769	0.868607	38	GRB2:982, RASA1:1054, NCK1:1273, TF:1487, MAP2K1:2673, EFNB1:3051, GRIA1:3386, PAK1:4031, MAP4K4:4151, RAP1B:4193	0.987627
REACTOME_FORMATION_OF_TRANSCRIPTION_COUPLED_NER_TC_NER_REPAIR_COMPLEX	0.0195748	0.74539	0.772	0.896349	23	POLR2K:1078, ERCC2:1269, XAB2:1696, CDK7:2052, ERCC6:3432, ERCC8:4081, GTF2H2B:4155, TCEA1:4282, GTF2H4:4819, POLR2A:4880	0.987627
KEGG_OXIDATIVE_PHOSPHORYLATION	0.0191145	0.486497	0.773	0.721696	112	ATP5B:143, ATP6V0C:499, COX17:769, NDUFS7:1107, ATP6V1A:1469, COX6B1:1540, NDUFB2:1767, ATP5A1:2086, SDHB:2284, NDUFV1:2573	0.987627
BIOCARTA_BARR_MAPK_PATHWAY	0.0237745	0.775592	0.778	0.911874	12	MAP2K2:1377, MAP2K1:2673, MAPK3:4496, MAPK1:4578, ARRB1:5195, DNM1:5715, ADCY1:6405, GNB1:8765, PLCB1:12452, GNGT1:16005	0.987627
ST_P38_MAPK_PATHWAY	0.0118814	0.80538	0.782	0.924361	36	CREB1:182, GADD45A:489, MAP3K10:1164, MAPK12:1549, MAP3K5:2280, MYEF2:2768, MKNK1:2864, ATF1:2908, MAP3K7:3192, MAPK11:3549	0.987627
REACTOME_STEROID_HORMONES	0.0281151	0.600614	0.783	0.810751	29	CYP2R1:770, CYP11A1:1991, CYP27B1:2171, HSD17B3:2432, STARD4:2747, STAR:4154, LGMN:4277, CYP11B2:4284, SRD5A3:4714, CYP11B1:4729	0.987627
KEGG_PARKINSONS_DISEASE	0.0174505	0.532617	0.786	0.76533	108	ATP5B:143, PPID:239, UBE2J1:789, NDUFS7:1107, COX6B1:1540, SNCA:1686, UBA1:1720, NDUFB2:1767, ATP5A1:2086, SLC25A6:2105	0.987627
BIOCARTA_SPPA_PATHWAY	0.0128167	0.835266	0.79	0.934675	22	PTGS1:569, PRKCB:2273, MAP2K1:2673, GNAI1:3428, MAPK3:4496, MAPK1:4578, F2RL3:5650, PRKCA:5812, SYK:6677, TBXAS1:6762	0.987627
BIOCARTA_EIF2_PATHWAY	0.0267006	0.759192	0.792	0.904238	11	EIF2S3:1671, PPP1CA:2620, EIF2AK3:2991, EIF2B5:3749, EIF2S1:7219, EIF2AK2:8972, EIF2AK4:10695, EIF5:12252, EIF2S2:12296, EIF2AK1:13159	0.987627
REACTOME_FORMATION_OF_FIBRIN_CLOT_CLOTTING_CASCADE	0.027436	0.597409	0.794	0.809694	31	C1QBP:470, GP1BA:887, KLKB1:1226, F13A1:1294, SERPING1:1591, FGB:1930, A2M:2013, VWF:2041, GP9:3387, FGA:3802	0.987627
KEGG_SELENOAMINO_ACID_METABOLISM	0.0166951	0.768446	0.795	0.909583	26	MAT2B:380, GGT7:597, PAPSS2:724, AHCYL1:1753, MAT1A:1859, PAPSS1:2348, SEPHS2:4923, AHCYL2:5030, LCMT1:5147, CTH:5304	0.987627
REACTOME_ACTIVATED_NOTCH1_TRANSMITS_SIGNAL_TO_THE_NUCLEUS	0.0234059	0.69166	0.797	0.867258	24	ADAM10:717, NEURL:2811, DNER:2829, DLL4:4827, DTX4:5120, ARRB1:5195, CNTN1:5672, MIB1:6027, MIB2:6220, PSENEN:6407	0.987627
REACTOME_RNA_POL_I_TRANSCRIPTION	0.0118891	0.754642	0.797	0.901463	58	HIST1H2BN:394, POLR2K:1078, ERCC2:1269, CBX3:1332, HIST1H2BI:1953, HIST1H2AB:1993, HIST1H2BM:1999, CDK7:2052, H2AFX:2177, HIST1H2BH:2785	0.987627
REACTOME_AMINE_DERIVED_HORMONES	0.0200065	0.788581	0.798	0.917623	15	TPH2:965, IYD:2461, TH:3055, DIO3:3818, TSHB:5730, SLC5A5:5747, AANAT:6955, DIO2:8368, TPO:8433, CGA:10199	0.987627
REACTOME_INTERACTION_BETWEEN_L1_AND_ANKYRINS	0.0237512	0.706523	0.805	0.871216	21	SPTB:40, ANK1:87, SPTA1:558, NRCAM:1558, SCN5A:1835, SCN4A:2401, ANK3:2982, SPTBN4:4403, SPTBN1:6198, SPTBN2:6411	0.987627
BIOCARTA_RARRXR_PATHWAY	0.0198432	0.790267	0.81	0.917623	15	RARA:270, NCOA2:386, HDAC3:4289, POLR2A:4880, GTF2F1:4896, NCOR2:6164, NCOA1:6681, GTF2B:9654, TBP:10980, NCOA3:11016	0.987627
BIOCARTA_VEGF_PATHWAY	0.010704	0.847474	0.811	0.940983	27	EIF2S3:1671, PIK3CG:1731, PRKCB:2273, EIF2B1:2370, PLCG1:2586, NOS3:2863, EIF2B2:2871, EIF2B5:3749, HIF1A:5036, EIF2B4:5365	0.987627
BIOCARTA_EGFR_SMRTE_PATHWAY	0.0214919	0.805108	0.812	0.924361	11	RARA:270, ZBTB16:374, THRB:2131, MAP2K1:2673, NCOR2:6164, EGFR:7429, MAPK14:12697, THRA:13859, RXRA:14109, MAP3K1:16617	0.987627
BIOCARTA_CBL_PATHWAY	0.0197065	0.805742	0.812	0.924361	13	GRB2:982, SH3GLB2:2043, PRKCB:2273, PRKCA:5812, EGFR:7429, SH3GLB1:7627, SRC:7776, SH3KBP1:8302, CSF1R:9320, MET:10911	0.987627
REACTOME_ADENYLATE_CYCLASE_ACTIVATING_PATHWAY	0.0266128	0.770797	0.819	0.909583	10	GNAL:2484, ADCY8:2897, ADCY2:4174, ADCY1:6405, ADCY4:6866, ADCY5:8135, ADCY3:8413, ADCY6:11308, ADCY9:13492, ADCY7:18772	0.987627
REACTOME_PHOSPHOLIPID_METABOLISM	0.00713814	0.73429	0.821	0.888658	193	LPIN3:164, MTMR7:221, LPCAT4:306, LPGAT1:360, PIKFYVE:456, AGPAT9:490, ARSH:720, PLD2:796, HADHB:829, PPAP2B:875	0.987627
REACTOME_SEROTONIN_RECEPTORS	0.0219583	0.792327	0.822	0.917623	12	HTR1E:1234, HTR6:1532, HTR1F:1952, HTR1A:2206, HTR2A:7489, HTR1D:8319, HTR1B:10847, HTR7:11822, HTR2B:13515, HTR2C:13862	0.987627
REACTOME_ACTIVATED_POINT_MUTANTS_OF_FGFR2	0.016071	0.82396	0.823	0.929409	16	FGF22:385, FGF9:843, FGF18:984, FGF7:1039, FGF8:2731, FGF20:3314, FGF6:4535, FGF5:9285, FGF17:12112, FGF10:12133	0.987627
REACTOME_ACTIVATION_OF_CHAPERONE_GENES_BY_XBP1S	0.0110701	0.797548	0.825	0.920746	45	SSR1:449, XBP1:611, CXXC1:989, WFS1:1340, C19orf10:1634, PPP2R5B:1858, SULT1A4:2134, ARFGAP1:2935, YIF1A:3077, DCTN1:3893	0.987627
REACTOME_AUTODEGRADATION_OF_CDH1_BY_CDH1_APC_C	0.0124763	0.760631	0.829	0.905109	50	PSMB4:1038, CDC16:1786, PSMB1:2035, PSMC2:2662, PSMA4:2693, PSMC4:2720, PSMC3:3528, PSMB7:3531, PSME2:3813, PSMD3:3822	0.987627
PID_CIRCADIAN_PATHWAY	0.0174424	0.815151	0.83	0.926402	15	CSNK1E:194, NONO:1880, NPAS2:2255, CLOCK:3935, ARNTL:4307, PER2:5402, CRY1:5560, NR1D1:5652, PER1:6787, CRY2:7715	0.987627
BIOCARTA_MONOCYTE_PATHWAY	0.0315094	0.730143	0.831	0.884476	10	ITGAM:1004, ICAM1:2042, ITGB2:2745, CD44:5548, ITGB1:8088, ITGA4:9062, ITGAL:9715, SELL:12030, SELP:15728, SELE:16354	0.987627
WNT_SIGNALING	0.0116235	0.707172	0.834	0.871216	88	WNT4:357, FZD8:465, WNT16:600, SFRP4:708, FZD2:739, CXXC4:753, HPRT1:1034, RHOU:1263, DIXDC1:1649, CSNK1D:1785	0.987627
KEGG_CARDIAC_MUSCLE_CONTRACTION	0.0102754	0.768448	0.834	0.909583	69	CACNA1S:585, MYL2:936, CACNA1D:1033, CACNA2D3:1142, CACNG5:1223, ATP1A3:1479, COX6B1:1540, MYH6:1569, CACNB3:1883, CACNB2:1990	0.987627
BIOCARTA_AGR_PATHWAY	0.0112265	0.818428	0.834	0.926402	35	PAK6:171, RAPSN:255, MUSK:1196, NRG3:1851, PAK3:2396, CHRNA1:3405, PAK1:4031, MAPK3:4496, MAPK1:4578, DVL1:6236	0.987627
PID_MAPK_TRK_PATHWAY	0.0139648	0.781535	0.839	0.915492	33	CREB1:182, TRPV1:904, EHD4:1813, MAP2K1:2673, CDK5R1:3280, RAP1B:4193, MAPK3:4496, MAPK1:4578, RIT2:4975, MAP2K3:5043	0.987627
BIOCARTA_INTEGRIN_PATHWAY	0.0117517	0.807461	0.839	0.925503	36	CAPN1:153, GRB2:982, MAP2K2:1377, CAPNS2:1885, CAPNS1:1916, ACTN1:2538, MAP2K1:2673, FYN:3787, TLN1:4209, MAPK3:4496	0.987627
REACTOME_ACTIVATION_OF_NF_KAPPAB_IN_B_CELLS	0.0110604	0.777045	0.84	0.912742	55	PSMB4:1038, IKBKB:1992, PSMB1:2035, PRKCB:2273, PSME4:2331, PSMC2:2662, PSMA4:2693, PSMC4:2720, MAP3K7:3192, PSMA8:3285	0.987627
REACTOME_HS_GAG_BIOSYNTHESIS	0.0136908	0.795425	0.84	0.919126	30	HS3ST3B1:712, EXT1:1098, HS6ST1:1490, HS6ST3:1807, HS3ST3A1:2556, HS3ST6:2874, NDST3:3910, GPC1:4258, HS2ST1:5091, GLCE:5209	0.987627
BIOCARTA_GATA3_PATHWAY	0.016438	0.825619	0.845	0.929607	15	PRKAR2B:2282, PRKAR1B:2608, MAF:3121, PRKAR1A:3408, PRKACB:3730, MAP2K3:5043, JUNB:6772, IL4:7039, PRKAR2A:8639, IL13:8790	0.987627
REACTOME_DIABETES_PATHWAYS	0.0065469	0.800586	0.846	0.923185	126	STX1A:30, MYO5A:192, HSP90B1:269, SSR1:449, XBP1:611, KIF5B:771, CXXC1:989, PLG:1239, SPCS2:1302, WFS1:1340	0.987627
BIOCARTA_HCMV_PATHWAY	0.0127996	0.855101	0.846	0.943795	17	CREB1:182, MAP2K2:1377, PIK3CG:1731, MAP2K1:2673, MAPK3:4496, MAPK1:4578, MAP2K3:5043, PIK3CA:7639, MAP2K6:8429, PIK3R1:9282	0.987627
KEGG_WNT_SIGNALING_PATHWAY	0.00861781	0.726213	0.849	0.883905	140	CSNK1E:194, SMAD3:271, WNT4:357, FZD8:465, WNT16:600, SFRP4:708, FZD2:739, CXXC4:753, PPP3CB:816, DVL3:1547	0.987627
KEGG_COLORECTAL_CANCER	0.0109269	0.768367	0.849	0.909583	61	SMAD3:271, AKT2:1353, PIK3CG:1731, APC2:2146, BAD:2160, SMAD4:2502, MAP2K1:2673, CTNNB1:2854, SMAD2:3149, MLH1:3346	0.987627
REACTOME_ERK_MAPK_TARGETS	0.0173735	0.788082	0.849	0.917623	20	DUSP4:376, DUSP7:1900, PPP2CB:2262, PPP2R5D:2596, RPS6KA3:3476, MAPK11:3549, MAPK3:4496, MAPK1:4578, MAPK7:5785, PPP2R1B:5847	0.987627
KEGG_PANTOTHENATE_AND_COA_BIOSYNTHESIS	0.0173037	0.810704	0.854	0.926402	16	ENPP1:1727, ENPP3:2044, DPYD:3564, UPB1:4936, COASY:6390, VNN1:7329, PANK1:8425, VNN2:8533, PPCS:8938, BCAT2:9534	0.987627
REACTOME_SYNTHESIS_OF_PIPS_AT_THE_LATE_ENDOSOME_MEMBRANE	0.0167707	0.854335	0.858	0.943795	10	MTMR7:221, PIKFYVE:456, MTMR4:3922, FIG4:4079, MTMR2:6913, PIK3C2A:11326, PIK3C3:11823, MTM1:13704, PIK3R4:15190, VAC14:18378	0.987627
REACTOME_LIGAND_GATED_ION_CHANNEL_TRANSPORT	0.0148029	0.814463	0.86	0.926402	21	GLRA1:215, GABRA1:462, HTR3C:1966, GLRA3:2628, GABRB2:4329, GABRB3:4944, ARHGEF9:5726, GLRA2:6204, GABRA3:6296, GABRA2:7839	0.987627
ST_WNT_CA2_CYCLIC_GMP_PATHWAY	0.0151489	0.814686	0.861	0.926402	20	SLC6A13:1284, TF:1487, ITPKA:2055, CAMK2G:2546, CAMK2A:3139, PDE6H:3270, PDE6A:3596, PDE6D:4775, PDE6B:6620, ITPR3:7974	0.987627
REACTOME_SULFUR_AMINO_ACID_METABOLISM	0.0135755	0.818067	0.864	0.926402	24	MAT2B:380, MTAP:767, MAT1A:1859, BHMT:2659, GCLM:3036, CTH:5304, CNDP2:6510, AHCY:7206, GCLC:7408, SUOX:7596	0.987627
REACTOME_SIGNALING_BY_NOTCH3	0.0192645	0.817322	0.866	0.926402	12	ADAM10:717, NOTCH3:3242, DLL4:4827, PSENEN:6407, APH1A:7040, PSEN2:7238, JAG1:7582, APH1B:10060, PSEN1:10649, JAG2:12203	0.987627
REACTOME_RAS_ACTIVATION_UOPN_CA2_INFUX_THROUGH_NMDA_RECEPTOR	0.0137958	0.858212	0.867	0.94421	14	NEFL:25, GRIN2B:2308, GRIN2C:2618, GRIN1:2797, CAMK2A:3139, GRIN2A:7707, RASGRF2:10505, ACTN2:10586, GRIN2D:12348, CAMK2D:12598	0.987627
BIOCARTA_IGF1R_PATHWAY	0.0145664	0.813166	0.868	0.926402	22	GRB2:982, BAD:2160, PRKAR2B:2282, PRKAR1B:2608, MAP2K1:2673, PRKAR1A:3408, PRKACB:3730, MAPK3:4496, MAPK1:4578, ADCY1:6405	0.987627
PID_UPA_UPAR_PATHWAY	0.010253	0.818423	0.868	0.926402	42	CTRC:434, ITGAM:1004, PLG:1239, FGB:1930, MMP3:2080, VTN:2552, ITGB2:2745, ITGB3:3262, VLDLR:3740, FGA:3802	0.987627
SIG_CHEMOTAXIS	0.00914111	0.835942	0.87	0.934675	43	PAK6:171, WASF1:292, GDI1:367, LIMK1:571, ARHGAP1:1331, AKT2:1353, PIK3CG:1731, RPS4X:1869, PAK3:2396, CFL1:3515	0.987627
REACTOME_MRNA_SPLICING	0.0125645	0.700268	0.871	0.868607	79	EFTUD2:683, SF3A2:932, FUS:1053, POLR2K:1078, U2AF2:1245, SNRNP40:1728, HNRNPA0:1749, HNRNPA1:2472, CLP1:2679, CSTF3:2712	0.987627
REACTOME_ASSOCIATION_OF_TRIC_CCT_WITH_TARGET_PROTEINS_DURING_BIOSYNTHESIS	0.0154875	0.784768	0.871	0.917557	26	XRN2:286, CCT8:316, FKBP9:1357, CCT2:1774, AP3M1:1982, CCT3:3241, FBXO4:3638, LONP2:3657, CCT6A:4142, KIFC3:5097	0.987627
REACTOME_PLC_BETA_MEDIATED_EVENTS	0.0125227	0.789643	0.873	0.917623	38	CREB1:182, PRKCG:1773, PRKAR2B:2282, PLCB4:2558, PRKAR1B:2608, ADCY8:2897, PRKAR1A:3408, GNAI1:3428, PRKACB:3730, ADCY2:4174	0.987627
KEGG_FC_EPSILON_RI_SIGNALING_PATHWAY	0.00720709	0.826317	0.874	0.929607	78	PLA2G2E:909, PLA2G12A:925, GRB2:982, AKT2:1353, MAP2K2:1377, MAPK12:1549, PIK3CG:1731, VAV3:1853, PRKCB:2273, PLCG1:2586	0.987627
PID_ANTHRAX_PATHWAY	0.0114591	0.870133	0.877	0.949712	17	MAP2K2:1377, MAP2K1:2673, VCAM1:2837, MAPK3:4496, MAPK1:4578, MAP2K3:5043, NLRP1:6482, ANTXR1:6495, IL1B:7483, MAP2K4:7832	0.987627
PID_PS1_PATHWAY	0.00907735	0.831595	0.879	0.933081	46	ADAM10:717, FRAT1:2271, CTBP1:2362, WIF1:2590, PPP2R5D:2596, CTNNB1:2854, MAP3K7:3192, WNT1:3714, LRP6:3979, MAPK3:4496	0.987627
BIOCARTA_CACAM_PATHWAY	0.0178112	0.845408	0.879	0.940323	10	CREB1:182, CAMK2G:2546, CAMK2A:3139, CAMK1G:7738, CAMKK1:8580, CAMK1:9265, CAMKK2:9274, CAMK2D:12598, CAMK2B:13304, CAMK4:18452	0.987627
REACTOME_SIGNALING_BY_NOTCH1	0.00903035	0.80316	0.884	0.924336	64	ADAM10:717, CDK8:1012, KAT2A:1446, HEY2:2699, NCOR1:2714, NEURL:2811, DNER:2829, HEY1:2881, TLE2:2944, CCNC:3064	0.987627
BIOCARTA_PYK2_PATHWAY	0.0118862	0.837144	0.885	0.935202	25	GRB2:982, MAP2K2:1377, PRKCB:2273, PLCG1:2586, MAP2K1:2673, PAK1:4031, MAPK3:4496, MAPK1:4578, MAP2K3:5043, PRKCA:5812	0.987627
REACTOME_INTEGRIN_CELL_SURFACE_INTERACTIONS	0.00715392	0.82866	0.888	0.931422	77	RASGRP2:166, ITGB6:551, TNC:977, GRB2:982, ITGAM:1004, ITGA2B:1181, COL1A2:1291, ITGA8:1926, FGB:1930, VWF:2041	0.987627
REACTOME_SMOOTH_MUSCLE_CONTRACTION	0.0139888	0.841809	0.889	0.937977	17	MYL12B:1842, MYL6B:2460, TPM1:3382, TLN1:4209, MYH11:4748, TPM3:5864, SORBS1:7805, ITGA1:9192, SORBS3:9205, CALD1:9659	0.987627
REACTOME_LIPOPROTEIN_METABOLISM	0.0138435	0.80355	0.891	0.924336	27	APOE:91, LPL:510, ALB:1153, MTTP:1471, A2M:2013, ABCA1:2340, CETP:2780, APOA5:3762, LIPC:4184, SDC1:5907	0.987627
KEGG_ACUTE_MYELOID_LEUKEMIA	0.0092817	0.808869	0.892	0.926285	57	RARA:270, JUP:291, ZBTB16:374, EIF4EBP1:375, GRB2:982, RUNX1:1189, AKT2:1353, MAP2K2:1377, PIK3CG:1731, IKBKB:1992	0.987627
PID_VEGFR1_2_PATHWAY	0.00595005	0.867557	0.894	0.949306	66	PRKAA2:95, PRKAB1:115, GRB2:982, NCK1:1273, MYOF:1349, MAP2K2:1377, PRKAA1:2006, PRKAG1:2253, PRKCB:2273, HSP90AB1:2470	0.987627
REACTOME_NEGATIVE_REGULATION_OF_FGFR_SIGNALING	0.00745858	0.882252	0.894	0.953907	33	FGF22:385, FGF9:843, FRS2:899, GRB2:982, FGF18:984, FGF7:1039, PPP2CB:2262, FGF8:2731, MKNK1:2864, FGF20:3314	0.987627
KEGG_VASOPRESSIN_REGULATED_WATER_REABSORPTION	0.00641356	0.888532	0.897	0.958483	40	CREB1:182, DYNC1I1:616, DYNC1LI2:1215, AQP3:1519, DCTN6:2115, VAMP2:2195, DCTN2:2685, PRKACB:3730, DCTN4:3841, DCTN1:3893	0.987627
REACTOME_MAP_KINASE_ACTIVATION_IN_TLR_CASCADE	0.00678473	0.871034	0.9	0.949712	48	CREB1:182, DUSP4:376, MAP2K2:1377, DUSP7:1900, PPP2CB:2262, PPP2R5D:2596, MAP2K1:2673, ATF2:2770, ATF1:2908, TAB3:3095	0.987627
KEGG_RENIN_ANGIOTENSIN_SYSTEM	0.00946279	0.892606	0.901	0.960173	17	THOP1:1848, CTSA:2053, NLN:3062, REN:3747, CTSG:4177, AGTR2:5588, MME:6820, AGTR1:7043, CMA1:7277, ANPEP:7851	0.987627
REACTOME_TRANSPORT_TO_THE_GOLGI_AND_SUBSEQUENT_MODIFICATION	0.01209	0.810263	0.902	0.926402	33	MGAT4B:169, FUT8:1070, ST8SIA2:1256, SEC24C:2424, MGAT2:2532, MGAT4A:2664, MAN1A1:3758, MGAT5:4612, B4GALT2:5129, ST6GAL1:6200	0.987627
PID_IL8_CXCR2_PATHWAY	0.00824267	0.873931	0.902	0.950539	31	RAB7A:549, PLD2:796, PIK3CG:1731, PRKCG:1773, PRKCB:2273, ELMO1:3520, HCK:3595, DOCK2:4098, ARRB1:5195, DNM1:5715	0.987627
KEGG_HUNTINGTONS_DISEASE	0.00678077	0.76862	0.904	0.909583	160	ATP5B:143, CREB1:182, PPID:239, DNAL1:254, CLTA:642, AP2B1:969, AP2A1:1046, POLR2K:1078, NDUFS7:1107, COX6B1:1540	0.987627
REACTOME_ACTIVATION_OF_BH3_ONLY_PROTEINS	0.00981556	0.90251	0.907	0.964563	13	BAD:2160, BBC3:2398, BCL2L11:3966, BMF:5034, BID:5408, YWHAB:6335, PMAIP1:7710, TFDP1:10968, MAPK8:11088, E2F1:12564	0.987627
REACTOME_REVERSIBLE_HYDRATION_OF_CARBON_DIOXIDE	0.0118158	0.887335	0.909	0.958483	12	CA3:68, CA5B:463, CA2:910, CA12:4760, CA13:5473, CA7:6253, CA6:8467, CA4:10662, CA1:15364, CA5A:16248	0.987627
KEGG_NICOTINATE_AND_NICOTINAMIDE_METABOLISM	0.00991139	0.875145	0.91	0.950837	21	NAMPT:801, ENPP1:1727, ENPP3:2044, NT5C1A:2856, NT5C2:4023, NT5E:4924, AOX1:5994, NMNAT2:6697, QPRT:6967, PNP:8048	0.987627
KEGG_RIBOFLAVIN_METABOLISM	0.00826136	0.908957	0.917	0.965237	16	MTMR7:221, ENPP1:1727, ENPP3:2044, RFK:2524, ACPT:4333, PHPT1:5849, MTMR2:6913, MTMR6:9126, ACP2:10008, TYR:11310	0.987627
REACTOME_REGULATION_OF_INSULIN_SECRETION	0.00484782	0.881192	0.919	0.953567	80	STX1A:30, PAX6:448, SPCS2:1302, KCNC2:1506, CACNB3:1883, CACNB2:1990, GNG8:2073, FFAR1:2100, SLC25A6:2105, VAMP2:2195	0.987627
REACTOME_THE_ROLE_OF_NEF_IN_HIV1_REPLICATION_AND_DISEASE_PATHOGENESIS	0.00989669	0.872427	0.922	0.949712	22	AP2B1:969, AP2A1:1046, AP1M1:3412, ELMO1:3520, HCK:3595, FYN:3787, DOCK2:4098, LCK:5530, AP1G1:5568, PACS1:6369	0.987627
PID_INTEGRIN1_PATHWAY	0.00631422	0.859533	0.928	0.944525	66	CD81:469, TNC:977, LAMB3:1211, COL3A1:1271, COL1A2:1291, F13A1:1294, MDK:1440, ITGA8:1926, FGB:1930, VTN:2552	0.987627
KEGG_FOLATE_BIOSYNTHESIS	0.0103508	0.905406	0.928	0.965237	11	QDPR:500, ALPL:3902, FPGS:6270, GGH:6504, ALPP:7766, SPR:7954, ALPI:8176, DHFR:8266, ALPPL2:13705, PTS:14003	0.987627
KEGG_GLYCOSPHINGOLIPID_BIOSYNTHESIS_GANGLIO_SERIES	0.00809244	0.913627	0.928	0.968172	15	SLC33A1:1354, ST6GALNAC6:2135, ST6GALNAC4:3195, ST6GALNAC5:3454, HEXB:6532, ST8SIA1:7625, HEXA:7657, ST3GAL2:9218, ST3GAL5:9664, ST6GALNAC3:11118	0.987627
REACTOME_TRANSLATION	0.00556175	0.842353	0.93	0.937977	108	RPS2:277, EIF4EBP1:375, SSR1:449, RPS29:507, RPL3L:762, EEF1B2:844, EIF3F:1129, SPCS2:1302, EIF2S3:1671, EEF1A1:1766	0.987627
REACTOME_ASPARAGINE_N_LINKED_GLYCOSYLATION	0.0056962	0.861454	0.931	0.945823	79	MGAT4B:169, ALG3:311, GMPPA:453, FUT8:1070, ALG5:1137, ST8SIA2:1256, TUSC3:1458, GMPPB:2076, SEC24C:2424, MGAT2:2532	0.987627
REACTOME_CHOLESTEROL_BIOSYNTHESIS	0.0108512	0.863418	0.931	0.947166	21	DHCR24:16, MSMO1:629, IDI1:778, HMGCR:1535, LBR:2368, HSD17B7:2777, HMGCS1:7385, LSS:7463, IDI2:7730, EBP:8936	0.987627
BIOCARTA_PGC1A_PATHWAY	0.00688209	0.917336	0.932	0.969338	19	SLC2A4:785, PPP3CB:816, CAMK2G:2546, CAMK2A:3139, ESRRA:3529, HDAC5:4319, PPP3CA:5651, YWHAH:7155, CAMK1G:7738, PPARA:8950	0.987627
REACTOME_BILE_SALT_AND_ORGANIC_ANION_SLC_TRANSPORTERS	0.0109518	0.899942	0.933	0.96357	11	SLC13A2:2514, SLC16A8:2985, SLC13A1:3497, SLC10A6:3815, SLC47A1:4628, SLC47A2:8675, SLC13A3:9736, SLC13A5:10280, SLC16A3:14580, SLC16A7:15511	0.987627
PID_CXCR3_PATHWAY	0.00608332	0.891655	0.934	0.960012	42	MLST8:362, MAP2K2:1377, MAP2K1:2673, ITGB2:2745, GNAI1:3428, MAPK11:3549, PIK3R2:3688, PIK3CB:3918, PIK3R3:4136, MAPK3:4496	0.987627
BIOCARTA_BLYMPHOCYTE_PATHWAY	0.0100726	0.907938	0.935	0.965237	11	ICAM1:2042, ITGB2:2745, HLA-DRA:4318, CR2:6281, HLA-DRB1:6551, PTPRC:7088, FCGR2B:7864, ITGAL:9715, CR1:14514, CD80:16913	0.987627
PID_AR_PATHWAY	0.00277744	0.940813	0.937	0.981518	60	NCOA2:386, NRIP1:891, VAV3:1853, FKBP4:1898, RANBP9:1975, TMPRSS2:2371, CTDSP1:2457, HNRNPA1:2472, PATZ1:2474, CTNNB1:2854	0.987627
PID_INTEGRIN4_PATHWAY	0.0106513	0.902674	0.939	0.964563	11	LAMB3:1211, LAMB1:4654, LAMA3:6573, ITGA6:7021, LAMB2:8210, LAMC1:8357, ITGB4:8760, LAMA2:9239, LAMA1:11172, LAMC2:11820	0.987627
REACTOME_RESPIRATORY_ELECTRON_TRANSPORT	0.00768581	0.83589	0.94	0.934675	61	NDUFS7:1107, COX6B1:1540, NDUFB2:1767, SDHB:2284, NDUFV1:2573, NDUFA2:2601, NDUFS1:2860, UQCR11:3073, SDHA:3150, NDUFA1:3498	0.987627
PID_AR_TF_PATHWAY	0.0046173	0.909347	0.942	0.965237	51	GATA2:172, NCOA2:386, PKN1:744, APPBP2:871, RXRB:959, RCHY1:2211, TMPRSS2:2371, DNAJA1:3040, KLK3:3171, KLK2:3269	0.987627
REACTOME_PROTEIN_FOLDING	0.00447497	0.91213	0.942	0.967388	51	XRN2:286, CCT8:316, PFDN6:555, PFDN5:682, PFDN1:985, FKBP9:1357, TUBA3C:1449, CCT2:1774, AP3M1:1982, TUBA3D:2247	0.987627
REACTOME_SCFSKP2_MEDIATED_DEGRADATION_OF_P27_P21	0.00411822	0.922317	0.942	0.969844	47	PSMB4:1038, PSMB1:2035, PSMC2:2662, PSMA4:2693, PSMC4:2720, PSMC3:3528, PSMB7:3531, PSME2:3813, PSMD3:3822, PSMC6:3864	0.987627
BIOCARTA_CDC42RAC_PATHWAY	0.00741806	0.929125	0.942	0.973296	12	ARPC1B:2015, ARPC1A:3739, ARPC2:4016, PAK1:4031, ACTR3:6450, PIK3CA:7639, ARPC5:9083, PIK3R1:9282, RAC1:12490, ARPC3:12871	0.987627
PID_FOXO_PATHWAY	0.00423072	0.920202	0.943	0.969512	47	CSNK1E:194, SFN:436, BCL6:445, GADD45A:489, CSNK1D:1785, IKBKB:1992, CAT:2805, CTNNB1:2854, SOD2:2996, FOXO3:3350	0.987627
REACTOME_HOST_INTERACTIONS_OF_HIV_FACTORS	0.00197695	0.944418	0.949	0.982319	105	AP2B1:969, PSMB4:1038, AP2A1:1046, RANBP1:1709, PSMB1:2035, SLC25A6:2105, PSME4:2331, CDK9:2545, PSMC2:2662, PSMA4:2693	0.987627
REACTOME_TERMINATION_OF_O_GLYCAN_BIOSYNTHESIS	0.00578722	0.934196	0.951	0.976208	17	MUC5B:183, MUC2:542, ST6GALNAC4:3195, MUC6:3644, MUC13:3985, ST6GAL1:6200, ST3GAL3:7465, MUC16:7682, ST3GAL2:9218, MUC7:10366	0.987627
PID_BMP_PATHWAY	0.00423111	0.924523	0.953	0.970863	42	BMP7:548, GREM1:550, CTDSPL:726, BMP4:1237, CTDSP1:2457, SMAD4:2502, PPP1CA:2620, FST:2666, SMURF1:3001, MAP3K7:3192	0.987627
REACTOME_NETRIN1_SIGNALING	0.00467341	0.922794	0.954	0.969844	36	SIAH2:711, TRPC5:793, SLIT3:990, NCK1:1273, TRPC4:1420, UNC5A:1556, ABLIM3:1750, PLCG1:2586, TRPC7:3135, NTN1:3625	0.987627
REACTOME_PASSIVE_TRANSPORT_BY_AQUAPORINS	0.00625536	0.945405	0.955	0.982319	10	AQP9:502, AQP3:1519, AQP10:2748, AQP5:6926, AQP6:7461, AQP4:7762, AQP8:12979, MIP:13571, AQP7:16974, AQP2:17682	0.987627
REACTOME_SYNTHESIS_OF_PE	0.00631066	0.942243	0.956	0.982208	11	LPIN3:164, LPIN2:944, ETNK2:5781, PHOSPHO1:6147, ETNK1:7273, CEPT1:9219, LPIN1:10535, CHKA:11224, PCYT2:11605, CHKB:14922	0.987627
ST_GRANULE_CELL_SURVIVAL_PATHWAY	0.00237615	0.965943	0.956	0.98873	27	CREB1:182, ITPKA:2055, CAMP:2346, MAPK9:3782, MAPK10:3915, MAPK1:4578, MAPK8IP1:6153, ASAH1:6273, JUN:6915, CXCL2:7177	0.987627
ST_INTERFERON_GAMMA_PATHWAY	0.00521484	0.954476	0.959	0.986909	10	PLA2G2A:4523, JAK1:4573, PTPRU:5367, CISH:7446, STAT1:8388, ELP2:9340, IFNGR1:9643, REG1A:10317, JAK2:11780, IFNG:14219	0.987627
BIOCARTA_HIF_PATHWAY	0.00445043	0.952434	0.96	0.985596	15	CREB1:182, LDHA:2202, NOS3:2863, COPS5:4470, HIF1A:5036, ASPH:5457, VHL:6101, JUN:6915, EP300:10156, P4HB:12128	0.987627
REACTOME_DOWNSTREAM_SIGNALING_EVENTS_OF_B_CELL_RECEPTOR_BCR	0.00317242	0.919257	0.961	0.969338	86	CREB1:182, MLST8:362, PSMB4:1038, THEM4:1314, AKT2:1353, IKBKB:1992, PSMB1:2035, BAD:2160, PRKCB:2273, PSME4:2331	0.987627
PID_HIF1_TFPATHWAY	0.00180505	0.959956	0.961	0.988481	65	GATA2:172, CREB1:182, SMAD3:271, PGM1:361, NCOA2:386, GCK:914, TF:1487, HNF4A:1586, ALDOA:2192, LDHA:2202	0.987627
BIOCARTA_ALK_PATHWAY	0.0019452	0.967381	0.962	0.98873	37	BMP7:548, MYL2:936, BMP4:1237, ACVR1:1860, SMAD4:2502, ATF2:2770, CTNNB1:2854, MAP3K7:3192, BMP2:3264, TGFBR1:3556	0.987627
REACTOME_ANTIGEN_PROCESSING_UBIQUITINATION_PROTEASOME_DEGRADATION	0.00330237	0.879692	0.965	0.952751	179	RNF123:158, ASB13:178, TRIM9:334, ZBTB16:374, FBXO44:625, TRIM21:663, ASB4:669, UBE2J1:789, PSMB4:1038, SOCS1:1123	0.988681
PID_ARF6_TRAFFICKING_PATHWAY	0.00169931	0.96859	0.972	0.98873	45	SCAMP2:114, SLC2A4:785, PLD2:796, PLD1:1764, VAMP3:1823, ITGA8:1926, SPAG9:2056, CTNNB1:2854, BIN1:3061, CTNND1:3372	0.99382
REACTOME_GABA_A_RECEPTOR_ACTIVATION	0.00435697	0.958336	0.974	0.988074	12	GABRA1:462, GABRB2:4329, GABRB3:4944, ARHGEF9:5726, GABRA3:6296, GABRA2:7839, GABRA6:8736, GABRA5:11593, GABRB1:12856, GABRG3:12860	0.993837
REACTOME_APC_C_CDC20_MEDIATED_DEGRADATION_OF_MITOTIC_PROTEINS	0.00167404	0.964602	0.979	0.98873	59	PSMB4:1038, CDC16:1786, PSMB1:2035, PSME4:2331, PSMC2:2662, PSMA4:2693, PSMC4:2720, PSMA8:3285, PSMC3:3528, PSMB7:3531	0.996909
PID_ALK1_PATHWAY	0.00151091	0.979155	0.981	0.993969	25	ACVR2A:337, ACVR1:1860, SMAD4:2502, PPP1CA:2620, TGFBR1:3556, MAPK3:4496, INHBA:4514, MAPK1:4578, ID1:5184, ACVR2B:5411	0.996919
REACTOME_UNFOLDED_PROTEIN_RESPONSE	0.000629955	0.984795	0.987	0.995703	77	HSP90B1:269, SSR1:449, XBP1:611, CXXC1:989, WFS1:1340, C19orf10:1634, PPP2R5B:1858, SULT1A4:2134, ATF4:2851, DIS3:2880	0.999
REACTOME_SIGNALING_BY_FGFR_MUTANTS	0.000122911	0.997778	0.994	0.998277	43	CPSF6:101, FGF22:385, FGF9:843, FRS2:899, GRB2:982, FGF18:984, FGF7:1039, PLCG1:2586, FGF8:2731, FGF20:3314	0.999
REACTOME_NOTCH1_INTRACELLULAR_DOMAIN_REGULATES_TRANSCRIPTION	0.000334808	0.994162	0.995	0.998277	40	CDK8:1012, KAT2A:1446, HEY2:2699, NCOR1:2714, HEY1:2881, TLE2:2944, CCNC:3064, HDAC11:4092, HDAC3:4289, HDAC5:4319	0.999
REACTOME_NGF_SIGNALLING_VIA_TRKA_FROM_THE_PLASMA_MEMBRANE	0.000225266	0.99312	0.996	0.998277	124	CREB1:182, MLST8:362, DUSP4:376, CLTA:642, FRS2:899, AP2B1:969, GRB2:982, AP2A1:1046, THEM4:1314, AKT2:1353	0.999
REACTOME_OPIOID_SIGNALLING	0.000158743	0.99645	0.996	0.998277	66	CREB1:182, PPP3CB:816, PRKCG:1773, GNG8:2073, PPP2CB:2262, PRKAR2B:2282, GNAL:2484, PLCB4:2558, PPP2R5D:2596, PRKAR1B:2608	0.999
REACTOME_SIGNALING_BY_ROBO_RECEPTOR	0.000463417	0.993356	0.997	0.998277	27	PAK6:171, CLASP1:810, SRGAP2:1128, NCK1:1273, PFN1:1678, CAP1:2570, PAK1:4031, GPC1:4258, ABL2:4694, ROBO2:4930	0.999
PID_LIS1_PATHWAY	0.000278331	0.996084	0.998	0.998277	26	DAB1:218, RELN:1126, NUDC:1560, MAP1B:1734, PAFAH1B3:2266, PPP2R5D:2596, CDK5R1:3280, VLDLR:3740, DYNLT1:4420, KATNA1:5660	0.999
REACTOME_RNA_POL_III_TRANSCRIPTION_TERMINATION	0.000151347	0.998277	0.999	0.998277	17	LZTS1:971, POLR2K:1078, POLR3D:1435, NFIB:3296, POLR3K:3335, POLR1C:6974, POLR3A:7652, POLR3F:8583, POLR3GL:9428, POLR1D:10145	0.999

## Sheet: ELL (PC2) Negative Correlations
	stat	pval	simpermPval	p.adj	# of genes	top ten genes and rank	qval
REACTOME_TRAF6_MEDIATED_INDUCTION_OF_TAK1_COMPLEX	-0.296279	0.00118118	0.001	0.0407985	10	TLR4:310, TICAM1:658, TAB1:936, TRAF6:1621, TLR3:2085, MAP3K7:3578, CD14:4252, LY96:5269, TAB2:7995, TAB3:13800	0.258116
REACTOME_IL1_SIGNALING	-0.138677	0.00402968	0.001	0.0768646	36	IRAK2:333, TAB1:936, MAP2K6:1427, TRAF6:1621, IL1RN:1668, IL1R1:2112, IL1R2:3033, CUL1:3192, IRAK1:3247, MYD88:3497	0.258116
REACTOME_BASE_FREE_SUGAR_PHOSPHATE_REMOVAL_VIA_THE_SINGLE_NUCLEOTIDE_REPLACEMENT_PATHWAY	-0.244975	0.00732358	0.002	0.103053	10	MBD4:38, MUTYH:53, OGG1:107, SMUG1:881, NTHL1:2080, APEX1:3078, TDG:4250, MPG:9197, POLB:14349, CCNO:15598	0.344155
KEGG_LYSOSOME	-0.107407	6.9335e-05	0.004	0.0115838	116	SLC11A1:76, CTSL1:199, MAN2B1:215, DNASE2B:251, ATP6V0D1:268, LAMP2:411, IDS:567, LAMP3:761, CD68:1074, AP4B1:1088	0.344155
REACTOME_THE_NLRP3_INFLAMMASOME	-0.26655	0.00221203	0.004	0.0536839	11	MEFV:17, P2RX7:1721, PANX1:1847, NLRP3:1858, CASP1:3067, APP:4513, TXN:4799, PSTPIP1:5698, HSP90AB1:6536, TXNIP:9366	0.344155
REACTOME_RIP_MEDIATED_NFKB_ACTIVATION_VIA_DAI	-0.2063	0.00245812	0.004	0.0581756	18	RELA:510, TICAM1:658, RIPK3:1391, NFKBIB:1436, TLR3:2085, ZBP1:2737, IKBKB:4402, NFKBIA:4482, APP:4513, AGER:6491	0.344155
PID_DNA_PK_PATHWAY	-0.284027	0.00014072	0.006	0.01448	15	PRKDC:572, CSNK2A1:727, PNKP:974, APLF:1148, DNTT:1293, NHEJ1:1471, POLL:2926, XRCC5:3006, XRCC6:3120, APTX:4206	0.344155
REACTOME_NUCLEOTIDE_BINDING_DOMAIN_LEUCINE_RICH_REPEAT_CONTAINING_RECEPTOR_NLR_SIGNALING_PATHWAYS	-0.13871	0.00148017	0.006	0.0443564	44	MEFV:17, IRAK2:333, TNFAIP3:877, TAB1:936, MAP2K6:1427, CARD9:1494, TRAF6:1621, P2RX7:1721, NLRC4:1810, PANX1:1847	0.344155
REACTOME_RESOLUTION_OF_AP_SITES_VIA_THE_MULTIPLE_NUCLEOTIDE_PATCH_REPLACEMENT_PATHWAY	-0.173098	0.0135261	0.006	0.134512	17	MBD4:38, MUTYH:53, OGG1:107, SMUG1:881, NTHL1:2080, APEX1:3078, LIG1:3112, POLD3:3757, TDG:4250, POLD4:5706	0.344155
KEGG_BASE_EXCISION_REPAIR	-0.150169	0.0028628	0.008	0.0630802	33	MBD4:38, MUTYH:53, OGG1:107, PARP4:462, POLE2:508, NEIL2:557, SMUG1:881, UNG:1080, NTHL1:2080, PARP2:2525	0.357392
REACTOME_INFLAMMASOMES	-0.243775	0.000739936	0.009	0.0315213	16	MEFV:17, P2RX7:1721, NLRC4:1810, PANX1:1847, NLRP3:1858, CASP1:3067, NLRP1:3499, AIM2:3897, APP:4513, TXN:4799	0.357392
REACTOME_DOWNSTREAM_TCR_SIGNALING	-0.149067	0.00265976	0.009	0.0606994	34	RELA:510, HLA-DPA1:697, HLA-DPB1:828, CD3G:902, TRAT1:1295, CD3D:1583, TRAF6:1621, CD3E:1922, HLA-DQA2:2994, MAP3K7:3578	0.357392
REACTOME_TAK1_ACTIVATES_NFKB_BY_PHOSPHORYLATION_AND_ACTIVATION_OF_IKKS_COMPLEX	-0.167964	0.00533089	0.009	0.0908383	23	IRAK2:333, RELA:510, TAB1:936, NFKBIB:1436, TRAF6:1621, IRAK1:3247, MAP3K7:3578, IKBKB:4402, NFKBIA:4482, APP:4513	0.357392
KEGG_LEISHMANIA_INFECTION	-0.0970756	0.00509003	0.01	0.0886865	70	IL12A:207, TLR4:310, RELA:510, HLA-DPA1:697, HLA-DPB1:828, TAB1:936, MARCKSL1:1233, HLA-DMB:1282, NFKBIB:1436, TRAF6:1621	0.368737
PID_IL1_PATHWAY	-0.139619	0.00719686	0.012	0.103053	31	RELA:510, TAB1:936, MAP2K6:1427, TRAF6:1621, IL1RN:1668, IL1R1:2112, IL1R2:3033, CASP1:3067, IRAK1:3247, MYD88:3497	0.412986
REACTOME_CYTOCHROME_P450_ARRANGED_BY_SUBSTRATE_TYPE	-0.16763	7.2083e-05	0.016	0.0115838	47	CYP2B6:711, CYP4A11:1319, CYP1A1:1399, CYP7A1:1687, CYP27B1:1747, CYP11A1:2082, CYP27A1:2128, TBXAS1:2170, POMC:2222, CYP2A6:2241	0.516232
KEGG_PRIMARY_IMMUNODEFICIENCY	-0.159732	0.00108955	0.017	0.0397585	35	AICDA:590, UNG:1080, CD8A:1266, CD79A:1457, CD3D:1583, CD3E:1922, RAG2:2664, RFX5:2710, CD19:2848, CD8B:3434	0.516232
PID_CDC42_REG_PATHWAY	-0.137078	0.0121341	0.02	0.124628	28	DNMBP:30, DOCK9:667, MCF2L:796, ARHGEF6:1235, ARHGEF25:1543, ITSN2:2593, FARP2:2605, VAV2:2748, ARHGDIA:3748, PLCG1:4343	0.543402
KEGG_GLYOXYLATE_AND_DICARBOXYLATE_METABOLISM	-0.168987	0.0193296	0.02	0.173363	16	GLYCTK:927, HAO2:1055, MTHFD2:1200, HYI:1432, MTHFD1L:1703, CS:1918, HAO1:5705, GRHPR:6453, MTHFD1:6984, MDH1:7016	0.543402
KEGG_HOMOLOGOUS_RECOMBINATION	-0.186316	0.000814112	0.022	0.0326969	27	RAD52:404, RPA4:679, TOP3B:1234, RAD51B:1333, NBN:2340, MUS81:2360, BRCA2:2526, RAD51D:2530, BLM:2660, XRCC3:2770	0.567855
PID_PI3K_PLC_TRK_PATHWAY	-0.130126	0.00779306	0.027	0.103053	35	HRAS:232, GRB2:274, EGR1:1237, CREB1:1287, CAMK4:1384, TRPV1:2090, CCND1:2245, BAD:2560, GSK3B:2734, PRKCD:3384	0.596894
BIOCARTA_IL1R_PATHWAY	-0.116863	0.0203022	0.029	0.177714	33	IRAK2:333, RELA:510, TAB1:936, MAP2K6:1427, TRAF6:1621, IL1RN:1668, IL1R1:2112, IRAK1:3247, MYD88:3497, MAP3K7:3578	0.596894
REACTOME_JNK_C_JUN_KINASES_PHOSPHORYLATION_AND_ACTIVATION_MEDIATED_BY_ACTIVATED_HUMAN_TAK1	-0.139486	0.0535119	0.029	0.303948	16	IRAK2:333, TAB1:936, TRAF6:1621, IRAK1:3247, MAP3K7:3578, MAPK9:3695, MAP2K7:5220, IKBKG:6598, NOD1:7631, TAB2:7995	0.596894
KEGG_ANTIGEN_PROCESSING_AND_PRESENTATION	-0.114258	0.000594253	0.033	0.028128	76	CTSL1:199, HSPA5:645, HLA-DPA1:697, HLA-DPB1:828, TAPBP:1226, CD8A:1266, HLA-DMB:1282, CREB1:1287, HSPA6:1542, HLA-F:1852	0.596894
REACTOME_TCR_SIGNALING	-0.107592	0.00797299	0.034	0.103053	51	GRAP2:275, RELA:510, HLA-DPA1:697, HLA-DPB1:828, CD3G:902, TRAT1:1295, EVL:1363, CD3D:1583, TRAF6:1621, CD3E:1922	0.596894
KEGG_GLYCOSAMINOGLYCAN_DEGRADATION	-0.14462	0.0218664	0.034	0.18385	21	HPSE:376, HPSE2:379, IDS:567, IDUA:1143, HGSNAT:1207, GLB1:1208, HEXB:1214, HYAL3:1642, ARSB:4150, HYAL1:5081	0.596894
REACTOME_RESOLUTION_OF_AP_SITES_VIA_THE_SINGLE_NUCLEOTIDE_REPLACEMENT_PATHWAY	-0.179513	0.0313624	0.034	0.230351	12	MBD4:38, MUTYH:53, OGG1:107, SMUG1:881, NTHL1:2080, APEX1:3078, TDG:4250, MPG:9197, XRCC1:12023, LIG3:12989	0.596894
KEGG_B_CELL_RECEPTOR_SIGNALING_PATHWAY	-0.103799	0.00222633	0.035	0.0536839	73	HRAS:232, GRB2:274, SOS2:495, RELA:510, CD72:1089, CD22:1245, NFKBIB:1436, VAV1:1450, CD81:1451, CD79A:1457	0.596894
PID_TOLL_ENDOGENOUS_PATHWAY	-0.152524	0.00975316	0.035	0.111291	24	TLR4:310, IRAK2:333, TLR1:445, TICAM1:658, TLR3:2085, TLR6:2179, IRAK1:3247, MYD88:3497, CD14:4252, IKBKB:4402	0.596894
REACTOME_DNA_REPAIR	-0.108432	0.0002358	0.037	0.0150676	97	MBD4:38, MUTYH:53, FANCG:80, BRIP1:95, OGG1:107, ERCC1:112, TDP1:208, FANCC:320, RAD52:404, POLH:426	0.596894
BIOCARTA_NFKB_PATHWAY	-0.157078	0.00916735	0.037	0.108853	23	TLR4:310, RELA:510, TNFAIP3:877, TAB1:936, TRAF6:1621, IL1R1:2112, FADD:2585, IRAK1:3247, MYD88:3497, MAP3K7:3578	0.596894
BIOCARTA_CTLA4_PATHWAY	-0.160951	0.0127657	0.037	0.12948	20	TRA@:16, GRB2:274, CD3G:902, CD3D:1583, CD3E:1922, CD80:3397, ICOSLG:4028, LCK:4174, ICOS:4827, CD86:5722	0.596894
REACTOME_ACTIVATED_TAK1_MEDIATES_P38_MAPK_ACTIVATION	-0.125431	0.0735286	0.04	0.350633	17	IRAK2:333, TAB1:936, MAP2K6:1427, TRAF6:1621, MAPKAPK2:2613, IRAK1:3247, MAP3K7:3578, MAP2K3:4437, IKBKG:6598, NOD1:7631	0.622515
KEGG_NOD_LIKE_RECEPTOR_SIGNALING_PATHWAY	-0.0883967	0.0163129	0.041	0.155082	62	MEFV:17, RELA:510, TNFAIP3:877, TAB1:936, CARD8:1054, NFKBIB:1436, CARD9:1494, NAIP:1620, TRAF6:1621, NLRC4:1810	0.622515
PID_INTEGRIN2_PATHWAY	-0.18765	0.000475602	0.043	0.0243128	29	ICAM3:102, GP1BA:123, ICAM2:140, ICAM1:1644, PLAUR:1718, ITGAX:2027, KNG1:2229, PLAT:2674, ICAM4:3642, ITGAM:4072	0.630951
REACTOME_BASE_EXCISION_REPAIR	-0.139312	0.0356411	0.044	0.243722	19	MBD4:38, MUTYH:53, OGG1:107, SMUG1:881, NTHL1:2080, APEX1:3078, LIG1:3112, POLD3:3757, TDG:4250, POLD4:5706	0.630951
BIOCARTA_SET_PATHWAY	-0.181809	0.04656	0.047	0.284706	10	DFFA:1040, PRF1:1966, HMGB2:2556, ANP32A:2998, APEX1:3078, SET:8158, CREBBP:8594, DFFB:10127, GZMB:11527, GZMA:12559	0.655754
REACTOME_INNATE_IMMUNE_SYSTEM	-0.0703202	0.000158524	0.05	0.01448	248	MEFV:17, DEFB127:133, CTSL1:199, LBP:214, TLR4:310, IRAK2:333, TLR1:445, RELA:510, C4BPB:548, TICAM1:658	0.679253
REACTOME_PHASE1_FUNCTIONALIZATION_OF_COMPOUNDS	-0.136097	0.000136526	0.052	0.01448	66	CYP2B6:711, FMO1:972, CYP4A11:1319, CYP1A1:1399, CYP7A1:1687, CYP27B1:1747, CYP11A1:2082, CYP27A1:2128, TBXAS1:2170, POMC:2222	0.68831
SA_PROGRAMMED_CELL_DEATH	-0.153218	0.0661867	0.056	0.331099	12	APAF1:1565, BAD:2560, BID:4207, CASP8AP2:4882, CES1:5779, CASP9:5854, BAK1:5981, BCL10:6052, BCL2:9840, BCL2L1:11160	0.692221
PID_ERB_GENOMIC_PATHWAY	-0.143025	0.0863575	0.056	0.369059	12	NR0B2:1320, NCOA3:1429, NCOA1:1976, SMARCE1:2035, ESR2:4747, SMARCA4:5358, SMARCB1:5975, UBA3:6643, DDX54:9904, C3:12719	0.692221
KEGG_TOLL_LIKE_RECEPTOR_SIGNALING_PATHWAY	-0.0904155	0.00175989	0.059	0.047854	101	IL12A:207, LBP:214, TLR4:310, TLR1:445, RELA:510, CXCL11:552, TICAM1:658, TAB1:936, MAP2K6:1427, CXCL10:1441	0.692221
REACTOME_SYNTHESIS_OF_PIPS_AT_THE_LATE_ENDOSOME_MEMBRANE	-0.170315	0.0622588	0.059	0.324398	10	MTM1:264, MTMR2:1177, PIK3R4:1577, MTMR7:2197, VAC14:2690, PIK3C2A:8681, MTMR4:8711, FIG4:8784, PIKFYVE:11606, PIK3C3:18696	0.692221
BIOCARTA_EPONFKB_PATHWAY	-0.153782	0.0774758	0.059	0.35548	11	EPO:168, RELA:510, EPOR:1321, SOD2:2862, NFKBIA:4482, HIF1A:5969, JAK2:8256, ARNT:11109, GRIN1:12246, CDKN1A:13368	0.692221
BIOCARTA_TCYTOTOXIC_PATHWAY	-0.217412	0.00666474	0.065	0.102621	13	TRA@:16, CD3G:902, CD8A:1266, CD3D:1583, ICAM1:1644, CD3E:1922, CD2:2105, ITGAL:7668, CD247:8527, ITGB2:10181	0.740681
REACTOME_SYNTHESIS_OF_PIPS_AT_THE_EARLY_ENDOSOME_MEMBRANE	-0.164289	0.0488494	0.066	0.287694	12	MTM1:264, INPP4B:387, MTMR2:1177, PIK3R4:1577, PI4K2A:2522, VAC14:2690, PIK3C2A:8681, MTMR4:8711, FIG4:8784, PIKFYVE:11606	0.740681
REACTOME_DOUBLE_STRAND_BREAK_REPAIR	-0.190238	0.00202422	0.069	0.0507245	22	BRIP1:95, TDP1:208, RAD52:404, PRKDC:572, NBN:2340, BRCA2:2526, XRCC5:3006, LIG1:3112, XRCC6:3120, MDC1:4473	0.757873
REACTOME_CS_DS_DEGRADATION	-0.178891	0.0319543	0.071	0.230408	12	IDS:567, NCAN:790, IDUA:1143, HEXB:1214, ARSB:4150, VCAN:4694, HYAL1:5081, HEXA:7846, CSPG4:8774, BGN:11635	0.763594
REACTOME_P2Y_RECEPTORS	-0.176342	0.0429155	0.073	0.268853	11	P2RY4:844, P2RY14:1111, P2RY2:2648, P2RY10:4801, P2RY12:5436, P2RY13:6340, LPAR6:6644, P2RY6:7433, P2RY1:9289, LPAR4:10202	0.769081
BIOCARTA_TOLL_PATHWAY	-0.101346	0.0331275	0.075	0.236519	37	TLR4:310, RELA:510, TAB1:936, MAP2K6:1427, TRAF6:1621, TLR3:2085, TLR6:2179, IRAK1:3247, MYD88:3497, MAP3K7:3578	0.774348
REACTOME_FANCONI_ANEMIA_PATHWAY	-0.207469	0.00175473	0.078	0.047854	19	FANCG:80, FANCC:320, FANCM:629, PALB2:1715, C19orf40:2078, FANCD2:2474, BRCA2:2526, ZBTB32:3225, FANCA:5022, ATM:5488	0.774348
REACTOME_TRAF6_MEDIATED_NFKB_ACTIVATION	-0.132514	0.035662	0.078	0.243722	21	RELA:510, NFKBIB:1436, TRAF6:1621, TRIM25:2601, MAVS:2955, IKBKB:4402, NFKBIA:4482, APP:4513, IFIH1:5125, AGER:6491	0.774348
PID_CD8_TCR_DOWNSTREAM_PATHWAY	-0.0862292	0.017306	0.08	0.159328	64	IL2RB:213, HRAS:232, CD3G:902, EGR1:1237, CD8A:1266, CD3D:1583, PPP3CB:1823, NFATC3:1880, CD3E:1922, PRF1:1966	0.779218
REACTOME_HS_GAG_DEGRADATION	-0.12371	0.0556143	0.082	0.309494	20	HPSE:376, HPSE2:379, IDS:567, IDUA:1143, GLB1:1208, GPC6:1755, SDC2:2159, SDC3:2285, GPC4:4339, AGRN:5303	0.783908
REACTOME_ACYL_CHAIN_REMODELLING_OF_PI	-0.145329	0.0514285	0.084	0.294734	15	PLA2G4C:485, PLA2G1B:2588, PLA2G4F:3142, PLA2G4D:3299, PLA2G2D:3467, PLA2G10:3938, PLA2G5:4126, PLA2G16:4547, MBOAT7:8040, PLBD1:8045	0.788427
REACTOME_GENERATION_OF_SECOND_MESSENGER_MOLECULES	-0.124555	0.0252116	0.087	0.202644	27	GRAP2:275, HLA-DPA1:697, HLA-DPB1:828, CD3G:902, EVL:1363, CD3D:1583, CD3E:1922, HLA-DQA2:2994, VASP:3179, WAS:4034	0.802004
PID_RHOA_REG_PATHWAY	-0.110942	0.0119594	0.091	0.124628	43	AKAP13:271, ARAP3:499, ARHGEF5:646, MCF2L:796, BCR:1065, ARHGEF3:1189, VAV1:1450, ARHGEF25:1543, ARHGEF1:1671, ARHGDIG:1732	0.814679
KEGG_INTESTINAL_IMMUNE_NETWORK_FOR_IGA_PRODUCTION	-0.113264	0.00796761	0.092	0.103053	46	TNFRSF17:7, MADCAM1:14, ITGB7:402, AICDA:590, HLA-DPA1:697, HLA-DPB1:828, HLA-DMB:1282, IL10:2930, HLA-DQA2:2994, CCL27:3281	0.814679
KEGG_FOLATE_BIOSYNTHESIS	-0.151255	0.0824723	0.094	0.362198	11	QDPR:1872, PTS:2294, FPGS:2815, ALPI:3042, ALPPL2:3198, ALPL:3199, SPR:5881, ALPP:8565, GGH:11163, DHFR:15458	0.814679
BIOCARTA_IL17_PATHWAY	-0.15669	0.0300898	0.096	0.227543	16	TRA@:16, CD3G:902, CD34:1057, CD8A:1266, CD3D:1583, CD3E:1922, CD2:2105, CD58:5147, CD247:8527, IL17A:8782	0.814679
REACTOME_TERMINATION_OF_O_GLYCAN_BIOSYNTHESIS	-0.136681	0.0511711	0.097	0.294734	17	MUC5B:2113, ST3GAL3:2146, ST6GAL1:2670, MUC19:2741, ST6GALNAC3:3561, MUC15:4583, MUC6:5066, MUC21:5321, MUC13:5575, ST6GALNAC2:7673	0.814679
REACTOME_P75NTR_SIGNALS_VIA_NFKB	-0.140237	0.107394	0.1	0.401039	11	RELA:510, TRAF6:1621, IRAK1:3247, MYD88:3497, PRKCI:4029, IKBKB:4402, NFKBIA:4482, RIPK2:11340, SQSTM1:12634, NGF:15045	0.814679
KEGG_HEMATOPOIETIC_CELL_LINEAGE	-0.0973619	0.00198077	0.101	0.0506285	85	GP1BA:123, CD38:153, EPO:168, CD3G:902, IL9R:1004, CSF3R:1056, CD34:1057, CD22:1245, CD8A:1266, CD1E:1292	0.814679
REACTOME_TRANSLOCATION_OF_ZAP_70_TO_IMMUNOLOGICAL_SYNAPSE	-0.184621	0.0168134	0.101	0.157996	14	HLA-DPA1:697, HLA-DPB1:828, CD3G:902, CD3D:1583, CD3E:1922, HLA-DQA2:2994, LCK:4174, HLA-DRB1:6983, ZAP70:8099, CD247:8527	0.814679
REACTOME_O_LINKED_GLYCOSYLATION_OF_MUCINS	-0.0976817	0.0194221	0.103	0.173363	48	GALNTL6:261, GALNT6:829, GCNT3:1013, MUC5B:2113, ST3GAL3:2146, GALNT5:2183, B3GNT2:2331, ST6GAL1:2670, MUC19:2741, GCNT4:3155	0.81803
PID_P38_GAMMA_DELTA_PATHWAY	-0.139313	0.109729	0.106	0.405301	11	STMN1:395, SNTA1:657, MAP2K6:1427, CCND1:2245, MAP2K3:4437, PKN1:5739, MAPT:6353, MAPK13:9998, MAPK12:13780, ZAK:13808	0.8291
BIOCARTA_AHSP_PATHWAY	-0.129646	0.105685	0.11	0.398848	13	ALAS2:821, HBA2:873, HBA1:1654, AHSP:2764, HBB:3646, GATA1:3734, ALAD:4155, FECH:6537, HMBS:11305, UROD:13676	0.842673
REACTOME_ENDOGENOUS_STEROLS	-0.163114	0.0287959	0.111	0.221694	15	CYP7A1:1687, CYP11A1:2082, CYP27A1:2128, POMC:2222, CYP7B1:3618, CYP8B1:4602, CYP46A1:5544, CYP19A1:5615, CYP11B2:6202, CYP17A1:6477	0.842673
REACTOME_NOD1_2_SIGNALING_PATHWAY	-0.0874297	0.103528	0.115	0.39852	29	IRAK2:333, TNFAIP3:877, TAB1:936, MAP2K6:1427, CARD9:1494, TRAF6:1621, BIRC2:2630, CASP1:3067, IRAK1:3247, MAP3K7:3578	0.855471
PID_BCR_5PATHWAY	-0.0748943	0.0372304	0.116	0.250423	65	HRAS:232, GRB2:274, RELA:510, CSNK2A1:727, CD72:1089, CD22:1245, NFKBIB:1436, CD79A:1457, SH3BP5:1576, TRAF6:1621	0.855471
PID_P38_MK2_PATHWAY	-0.102298	0.113476	0.123	0.408137	20	CREB1:1287, MAPKAPK2:2613, YWHAH:3425, LSP1:4057, TH:4671, YWHAQ:5342, HSPB1:5776, ETV1:6077, TCF3:6490, YWHAE:6525	0.894318
REACTOME_POST_TRANSLATIONAL_MODIFICATION_SYNTHESIS_OF_GPI_ANCHORED_PROTEINS	-0.105709	0.0623062	0.128	0.324398	26	PIGO:47, PIGV:87, PIGS:143, PLAUR:1718, PIGP:1740, PIGW:1818, PIGQ:1856, PIGK:2890, DPM1:3083, DPM2:3390	0.896614
REACTOME_NFKB_ACTIVATION_THROUGH_FADD_RIP1_PATHWAY_MEDIATED_BY_CASPASE_8_AND10	-0.169932	0.0415939	0.13	0.264462	12	CASP10:695, FADD:2585, TRIM25:2601, MAVS:2955, IKBKB:4402, IFIH1:5125, IKBKG:6598, DDX58:6925, RIPK1:8104, CHUK:11128	0.896614
KEGG_GLYCOSPHINGOLIPID_BIOSYNTHESIS_LACTO_AND_NEOLACTO_SERIES	-0.107129	0.0588716	0.13	0.319871	26	B3GALT1:130, GCNT2:1344, FUT4:1781, ST3GAL3:2146, B3GNT2:2331, B3GALT5:2951, FUT5:3648, ST8SIA1:4098, B4GALT4:5106, B3GNT3:6390	0.896614
REACTOME_IMMUNOREGULATORY_INTERACTIONS_BETWEEN_A_LYMPHOID_AND_A_NON_LYMPHOID_CELL	-0.120984	0.00161655	0.131	0.0469536	57	ICAM3:102, ICAM2:140, ITGB7:402, CD3G:902, CD34:1057, CD8A:1266, CD81:1451, LILRB1:1478, CD3D:1583, ICAM1:1644	0.896614
BIOCARTA_THELPER_PATHWAY	-0.178762	0.0256928	0.132	0.205222	13	TRA@:16, CD3G:902, CD3D:1583, ICAM1:1644, CD3E:1922, CD2:2105, ITGAL:7668, CD247:8527, ITGB2:10181, CD4:10889	0.896614
BIOCARTA_CTL_PATHWAY	-0.190604	0.0135775	0.135	0.134512	14	TRA@:16, CD3G:902, CD3D:1583, ICAM1:1644, CD3E:1922, PRF1:1966, FAS:6301, ITGAL:7668, HLA-A:8278, CD247:8527	0.901773
SIG_BCR_SIGNALING_PATHWAY	-0.0790392	0.0640748	0.137	0.32755	46	GRB2:274, SOS2:495, BCR:1065, CD22:1245, NR0B2:1320, VAV1:1450, CD81:1451, PPP3CB:1823, NFATC2:2520, BAD:2560	0.901773
BIOCARTA_FREE_PATHWAY	-0.144791	0.112957	0.138	0.408137	10	RELA:510, XDH:2567, GSS:2678, SOD1:5104, NOX1:6312, GSR:7067, GPX1:7308, TNF:11922, IL8:12139, NFKB1:14008	0.901773
REACTOME_ACTIVATION_OF_IRF3_IRF7_MEDIATED_BY_TBK1_IKK_EPSILON	-0.124287	0.173647	0.144	0.502539	10	TLR4:310, TICAM1:658, TLR3:2085, CD14:4252, LY96:5269, IRF3:7051, IRF7:11006, IKBKE:12950, TBK1:14280, TRAF3:15174	0.91285
REACTOME_INTERFERON_ALPHA_BETA_SIGNALING	-0.0953276	0.00959318	0.145	0.110717	62	IFIT1:639, IFI27:664, IFITM2:827, EGR1:1237, XAF1:1512, IRF4:1734, HLA-F:1852, USP18:2134, IFNA8:2417, OASL:2620	0.91285
BIOCARTA_GSK3_PATHWAY	-0.0970006	0.0871656	0.145	0.369059	26	LBP:214, TLR4:310, RELA:510, CCND1:2245, GSK3B:2734, IRAK1:3247, MYD88:3497, CD14:4252, APC:4508, TOLLIP:4880	0.91285
REACTOME_METABOLISM_OF_STEROID_HORMONES_AND_VITAMINS_A_AND_D	-0.130206	0.00775496	0.148	0.103053	35	CUBN:1425, HSD17B3:1712, STAR:1737, CYP27B1:1747, CYP11A1:2082, POMC:2222, LRP2:3128, PNLIP:3396, CGA:3563, CLPS:5166	0.920511
REACTOME_ACYL_CHAIN_REMODELLING_OF_PS	-0.118349	0.11268	0.152	0.408137	15	MBOAT1:1569, PLA2G1B:2588, PLA2G4F:3142, PLA2G4D:3299, PLA2G2D:3467, PLA2G10:3938, PLA2G5:4126, PLA2G16:4547, LPCAT4:10703, PLA2G12A:10929	0.934135
PID_HIF1_TFPATHWAY	-0.0519198	0.148689	0.158	0.465746	65	CP:46, EPO:168, ABCB1:625, ID2:1002, CREB1:1287, GATA2:1475, PGK1:1743, NCOA1:1976, TF:2318, TFF3:2733	0.959585
BIOCARTA_DC_PATHWAY	-0.130786	0.0338356	0.167	0.237593	22	IL12A:207, TLR4:310, ITGAX:2027, CD2:2105, IL10:2930, IL12B:3004, IFNB1:4058, CD33:4092, IL4:4940, IFNG:6308	0.963851
PID_CD8_TCR_PATHWAY	-0.0761872	0.0578307	0.167	0.3172	52	HRAS:232, GRB2:274, GRAP2:275, CD3G:902, CD8A:1266, VAV1:1450, CD3D:1583, TRAF6:1621, CD3E:1922, PRF1:1966	0.963851
REACTOME_RIG_I_MDA5_MEDIATED_INDUCTION_OF_IFN_ALPHA_BETA_PATHWAYS	-0.0848751	0.018233	0.17	0.165261	65	RELA:510, CASP10:695, TNFAIP3:877, NFKBIB:1436, SIKE1:1545, TRAF6:1621, IFNA8:2417, FADD:2585, TRIM25:2601, IFNA2:2718	0.963851
REACTOME_NUCLEOTIDE_LIKE_PURINERGIC_RECEPTORS	-0.121697	0.102861	0.172	0.398223	15	P2RY4:844, ADORA2A:914, P2RY14:1111, P2RY2:2648, ADORA2B:4787, P2RY10:4801, P2RY12:5436, P2RY13:6340, LPAR6:6644, P2RY6:7433	0.963851
REACTOME_TOLL_RECEPTOR_CASCADES	-0.0437582	0.115975	0.172	0.410107	109	CTSL1:199, LBP:214, TLR4:310, IRAK2:333, TLR1:445, RELA:510, TICAM1:658, TAB1:936, CREB1:1287, MAP2K6:1427	0.963851
REACTOME_DEGRADATION_OF_THE_EXTRACELLULAR_MATRIX	-0.102095	0.0617458	0.179	0.324398	28	MMP8:19, MMP9:182, CTRB2:249, KLKB1:338, PRSS1:864, MMP7:1052, MMP10:1160, MMP25:2203, CTRB1:2842, MMP13:3448	0.963851
KEGG_RIBOFLAVIN_METABOLISM	-0.105736	0.143303	0.184	0.459186	16	ACPP:1168, MTMR2:1177, PHPT1:1239, ENPP3:2010, MTMR7:2197, MTMR1:3260, ACP2:4330, ENPP1:4459, ACP6:6354, ACP5:7993	0.963851
REACTOME_ACYL_CHAIN_REMODELLING_OF_PE	-0.0898796	0.154193	0.185	0.475988	21	PLA2G4C:485, MBOAT1:1569, PLA2G1B:2588, PLA2G4F:3142, PLA2G4D:3299, PLA2G2D:3467, PLA2G10:3938, PNPLA8:4109, PLA2G5:4126, PLA2G16:4547	0.963851
REACTOME_SIGNALING_BY_ILS	-0.0443161	0.123405	0.187	0.425098	102	IL2RB:213, HRAS:232, GRB2:274, IRAK2:333, RELA:510, CRKL:680, CSF2RB:686, TAB1:936, MAP2K6:1427, VAV1:1450	0.963851
ST_WNT_BETA_CATENIN_PATHWAY	-0.0625104	0.20769	0.188	0.561323	34	AXIN2:973, FRAT1:2141, DKK4:2626, GSK3B:2734, FSTL1:3385, APC:4508, LRP1:4566, GSK3A:4854, PTPRA:5028, WIF1:5512	0.963851
PID_FANCONI_PATHWAY	-0.111422	0.00904644	0.193	0.108853	46	FANCG:80, BRIP1:95, RAD17:194, FANCC:320, FANCI:405, FANCM:629, PALB2:1715, C19orf40:2078, NBN:2340, FANCD2:2474	0.963851
REACTOME_CYTOKINE_SIGNALING_IN_IMMUNE_SYSTEM	-0.0333018	0.0687624	0.193	0.335413	257	EIF4A2:36, MT2A:134, IL2RB:213, HRAS:232, GRB2:274, IRAK2:333, RELA:510, IFIT1:639, IFI27:664, CRKL:680	0.963851
REACTOME_GENERIC_TRANSCRIPTION_PATHWAY	-0.062873	0.000177217	0.194	0.01448	308	ZNF585A:23, ZNF613:44, ZNF157:204, ZNF215:219, ZNF473:321, ZNF286A:363, ZNF235:439, ZFP2:479, ZNF263:528, RARG:638	0.963851
REACTOME_HOMOLOGOUS_RECOMBINATION_REPAIR_OF_REPLICATION_INDEPENDENT_DOUBLE_STRAND_BREAKS	-0.138728	0.0548232	0.196	0.307299	16	BRIP1:95, RAD52:404, NBN:2340, BRCA2:2526, LIG1:3112, MDC1:4473, ATM:5488, RPA1:6219, MRE11A:6315, RPA3:7330	0.963851
NABA_ECM_REGULATORS	-0.0527254	0.00654764	0.198	0.102621	228	MMP8:19, TMPRSS15:57, CST8:164, MMP9:182, HPSE:376, HPSE2:379, ADAM9:455, PLOD2:815, ADAM23:855, PRSS1:864	0.963851
KEGG_DNA_REPLICATION	-0.0860146	0.0744673	0.202	0.351178	36	RNASEH2B:31, DNA2:301, POLE2:508, RPA4:679, RNASEH2A:2366, MCM7:2958, LIG1:3112, RNASEH2C:3124, POLD3:3757, MCM4:4141	0.963851
PID_BARD1_PATHWAY	-0.107857	0.0484335	0.203	0.286565	28	FANCG:80, FANCC:320, PRKDC:572, CSTF1:1373, RBBP8:1761, NBN:2340, FANCD2:2474, BARD1:2502, XRCC5:3006, XRCC6:3120	0.963851
REACTOME_MITOCHONDRIAL_TRNA_AMINOACYLATION	-0.114121	0.0704233	0.203	0.340013	21	CARS2:1230, AARS2:2102, GARS:2143, TARS2:2732, PARS2:3408, FARS2:3547, PPA2:3704, DARS2:3972, RARS2:4266, HARS2:5057	0.963851
REACTOME_TRAF6_MEDIATED_IRF7_ACTIVATION	-0.12595	0.0170698	0.206	0.159235	30	SIKE1:1545, TRAF6:1621, IFNA8:2417, TRIM25:2601, IFNA2:2718, IFNA4:2864, IFNA16:2934, MAVS:2955, IFNA21:2974, IFNA17:3496	0.963851
BIOCARTA_MAL_PATHWAY	-0.0965522	0.168351	0.206	0.498332	17	HRAS:232, MAL:476, MAP4K2:1271, DIAPH1:1850, ROCK1:2501, MAPK1:3180, RAF1:6547, MAPK3:9019, MAP2K2:9648, SRF:10190	0.963851
BIOCARTA_HSP27_PATHWAY	-0.098228	0.18798	0.206	0.525687	15	HSPB2:1505, APAF1:1565, MAPKAPK2:2613, CASP3:5602, HSPB1:5776, CASP9:5854, FAS:6301, CYCS:8363, FASLG:8832, DAXX:9074	0.963851
KEGG_OTHER_GLYCAN_DEGRADATION	-0.128951	0.0742716	0.207	0.351178	16	MAN2B1:215, GLB1:1208, HEXB:1214, MANBA:1932, NEU3:3032, FUCA1:3052, AGA:4060, HEXA:7846, FUCA2:8333, NEU4:8728	0.963851
BIOCARTA_RANKL_PATHWAY	-0.112151	0.146415	0.207	0.463223	14	TNFRSF11A:101, RELA:510, TRAF6:1621, FOSL1:2991, IFNB1:4058, IRF9:7009, TNFSF11:7883, EIF2AK2:9442, IFNAR1:10347, FOS:10642	0.963851
KEGG_NON_HOMOLOGOUS_END_JOINING	-0.151265	0.0590685	0.211	0.319871	13	PRKDC:572, DNTT:1293, NHEJ1:1471, POLL:2926, XRCC5:3006, XRCC6:3120, MRE11A:6315, LIG4:6730, XRCC4:7310, DCLRE1C:9340	0.963851
BIOCARTA_D4GDI_PATHWAY	-0.107576	0.179445	0.214	0.514552	13	CASP10:695, APAF1:1565, PRF1:1966, CASP1:3067, CASP3:5602, CASP9:5854, CYCS:8363, ARHGAP5:9177, JUN:10857, GZMB:11527	0.963851
REACTOME_PD1_SIGNALING	-0.124229	0.0682027	0.219	0.333958	18	HLA-DPA1:697, HLA-DPB1:828, CD3G:902, CD3D:1583, CD3E:1922, HLA-DQA2:2994, LCK:4174, PDCD1:5205, HLA-DRB1:6983, CD247:8527	0.963851
REACTOME_HYALURONAN_UPTAKE_AND_DEGRADATION	-0.111225	0.223379	0.219	0.581421	10	HMMR:1147, HEXB:1214, SLC9A1:4893, HYAL1:5081, HEXA:7846, CD44:8062, LYVE1:8171, GUSB:11640, STAB2:11872, HYAL2:16001	0.963851
REACTOME_BIOLOGICAL_OXIDATIONS	-0.0811829	0.0016645	0.222	0.0472717	127	CYP2B6:711, SULT1E1:839, FMO1:972, CYP4A11:1319, SULT1B1:1364, CYP1A1:1399, UGT2B4:1568, CYP7A1:1687, CNDP2:1694, CYP27B1:1747	0.963851
REACTOME_INTERFERON_GAMMA_SIGNALING	-0.057969	0.121223	0.222	0.423287	60	MT2A:134, HLA-DPA1:697, GBP6:742, HLA-DPB1:828, ICAM1:1644, IRF4:1734, SP100:1757, HLA-F:1852, OASL:2620, HLA-DQA2:2994	0.963851
REACTOME_STEROID_HORMONES	-0.117233	0.0290404	0.227	0.222237	29	CUBN:1425, HSD17B3:1712, STAR:1737, CYP27B1:1747, CYP11A1:2082, POMC:2222, LRP2:3128, CGA:3563, STARD4:5261, HSD17B1:5313	0.963851
REACTOME_XENOBIOTICS	-0.167452	0.0446613	0.229	0.274409	12	CYP2B6:711, CYP1A1:1399, CYP2A6:2241, CYP2D6:4729, CYP2C8:5858, CYP2F1:5997, CYP2C9:6333, CYP3A4:8192, CYP2A13:10120, CYP2E1:10244	0.963851
REACTOME_REGULATION_OF_IFNA_SIGNALING	-0.125445	0.0335359	0.231	0.236789	24	USP18:2134, IFNA8:2417, IFNA2:2718, IFNA4:2864, IFNA16:2934, IFNA21:2974, SOCS3:3050, PTPN1:3130, TYK2:3163, STAT2:3412	0.963851
REACTOME_RECYCLING_OF_BILE_ACIDS_AND_SALTS	-0.187917	0.0309728	0.232	0.229561	11	SLCO1B3:726, SLCO1A2:1175, SLC10A1:1547, ABCB11:1829, SLC27A5:2270, FABP6:2574, SLCO1B1:6260, ABCC3:10481, SLC10A2:11170, ALB:13957	0.963851
REACTOME_INTRINSIC_PATHWAY	-0.126815	0.0791964	0.233	0.358031	16	GP1BA:123, KLKB1:338, F8:340, VWF:663, KNG1:2229, PRCP:3530, SERPING1:4115, GP9:4879, A2M:7658, F10:9669	0.963851
ST_P38_MAPK_PATHWAY	-0.0507935	0.292189	0.233	0.651688	36	MKNK1:860, TAB1:936, CREB1:1287, MAP2K6:1427, TRAF6:1621, CREB3:2039, IL1R1:2112, MAPKAPK2:2613, MAPK1:3180, MAP3K7:3578	0.963851
PID_TCR_PATHWAY	-0.0615931	0.0891078	0.234	0.369059	64	HRAS:232, GRB2:274, GRAP2:275, SLA2:421, CD3G:902, VAV1:1450, CD3D:1583, TRAF6:1621, CD3E:1922, RASSF5:2458	0.963851
KEGG_COMPLEMENT_AND_COAGULATION_CASCADES	-0.112279	0.00140433	0.238	0.0443564	68	BDKRB1:256, KLKB1:338, F8:340, C4BPB:548, VWF:663, PLAUR:1718, C1R:1763, CD59:2175, KNG1:2229, C1QA:2300	0.963851
REACTOME_TRANSPORT_OF_ORGANIC_ANIONS	-0.10973	0.207751	0.239	0.561323	11	SLCO1B3:726, SLCO1A2:1175, SLCO1C1:2696, SLCO4C1:5187, SLCO1B1:6260, SLCO2B1:6441, SLCO2A1:7197, SLCO3A1:9561, SLCO4A1:12419, ALB:13957	0.963851
KEGG_AUTOIMMUNE_THYROID_DISEASE	-0.0925462	0.0224788	0.242	0.186725	51	HLA-DPA1:697, HLA-DPB1:828, HLA-DMB:1282, HLA-F:1852, PRF1:1966, IFNA8:2417, IFNA2:2718, IFNA4:2864, IL10:2930, IFNA16:2934	0.963851
ST_T_CELL_SIGNAL_TRANSDUCTION	-0.0614021	0.154783	0.243	0.476658	45	GRB2:274, GRAP2:275, EPHB2:337, SOS2:495, NFKBIB:1436, VAV1:1450, CD3D:1583, RASGRP3:1726, RASGRP4:2117, NFAT5:2427	0.963851
BIOCARTA_NO2IL12_PATHWAY	-0.137019	0.0505978	0.244	0.294734	17	IL12A:207, CD3G:902, CD3D:1583, CD3E:1922, CD2:2105, NOS2:2944, IL12B:3004, TYK2:3163, IFNG:6308, JAK2:8256	0.963851
BIOCARTA_TCRA_PATHWAY	-0.14228	0.0880078	0.244	0.369059	12	TRA@:16, CD3G:902, CD3D:1583, CD3E:1922, LCK:4174, HLA-DRB1:6983, ZAP70:8099, CD247:8527, CD4:10889, PTPRC:12318	0.963851
KEGG_RETINOL_METABOLISM	-0.08925	0.0248738	0.253	0.202195	53	CYP2B6:711, CYP4A11:1319, CYP1A1:1399, UGT2B4:1568, CYP2A6:2241, CYP4A22:2449, ALDH1A1:2617, DHRS9:3708, UGT2A3:3910, RDH5:3924	0.963851
KEGG_CELL_ADHESION_MOLECULES_CAMS	-0.0502737	0.0480272	0.254	0.286565	131	MADCAM1:14, ICAM3:102, ICAM2:140, GLG1:344, ITGB7:402, HLA-DPA1:697, HLA-DPB1:828, SIGLEC1:943, CD34:1057, CD22:1245	0.963851
REACTOME_ACYL_CHAIN_REMODELLING_OF_PG	-0.102298	0.156771	0.254	0.479314	16	PLA2G1B:2588, PLA2G4F:3142, PLA2G4D:3299, PLA2G2D:3467, PLA2G10:3938, PLA2G5:4126, LPGAT1:4398, CRLS1:5379, LPCAT1:9557, LPCAT4:10703	0.963851
REACTOME_DEPOSITION_OF_NEW_CENPA_CONTAINING_NUCLEOSOMES_AT_THE_CENTROMERE	-0.0762478	0.0772532	0.255	0.35548	45	CASC5:121, HJURP:370, HIST1H2BF:382, HIST1H2BO:568, CENPO:1021, MLF1IP:1786, MIS18BP1:1921, CENPP:2137, HIST3H2BB:2273, RSF1:2744	0.963851
REACTOME_PHOSPHORYLATION_OF_CD3_AND_TCR_ZETA_CHAINS	-0.127374	0.0778829	0.258	0.35548	16	HLA-DPA1:697, HLA-DPB1:828, CD3G:902, CD3D:1583, CD3E:1922, HLA-DQA2:2994, LCK:4174, HLA-DRB1:6983, CD247:8527, HLA-DQA1:8736	0.963851
BIOCARTA_INTRINSIC_PATHWAY	-0.104415	0.0832512	0.258	0.363123	23	KLKB1:338, F8:340, COL4A4:478, COL4A3:880, KNG1:2229, COL4A5:3942, SERPING1:4115, PROS1:5168, FGB:5247, F5:6403	0.963851
BIOCARTA_P53HYPOXIA_PATHWAY	-0.0706142	0.251907	0.264	0.611737	22	ABCB1:625, NFKBIB:1436, NQO1:1735, GADD45A:4184, HSPA1A:4468, ATM:5488, CSNK1D:5588, EP300:5771, HIF1A:5969, RPA1:6219	0.963851
REACTOME_TRANSPORT_OF_VITAMINS_NUCLEOSIDES_AND_RELATED_MOLECULES	-0.0623228	0.230261	0.266	0.587373	31	SLCO1B3:726, SLCO1A2:1175, SLC28A3:1573, SLC29A3:1612, SLC35C1:1958, SLC28A2:2424, SLCO1C1:2696, SLC35B2:3476, SLCO4C1:5187, SLC33A1:5517	0.963851
REACTOME_SYNTHESIS_SECRETION_AND_INACTIVATION_OF_GIP	-0.119652	0.135392	0.267	0.451779	13	FFAR1:1283, GPR119:1553, SEC11C:2397, SPCS2:5754, PCSK1:5927, SPCS1:6434, SEC11A:8255, DPP4:8296, GIP:9002, SPCS3:9597	0.963851
BIOCARTA_RELA_PATHWAY	-0.105721	0.143361	0.267	0.459186	16	RELA:510, TRAF6:1621, FADD:2585, IKBKB:4402, NFKBIA:4482, TRADD:4730, EP300:5771, IKBKG:6598, RIPK1:8104, CREBBP:8594	0.963851
KEGG_MISMATCH_REPAIR	-0.0977834	0.104779	0.27	0.398848	23	MLH3:542, RPA4:679, LIG1:3112, POLD3:3757, MLH1:4259, RFC1:4276, MSH3:4715, POLD4:5706, PCNA:6024, RPA1:6219	0.963851
ST_B_CELL_ANTIGEN_RECEPTOR	-0.0705492	0.123128	0.273	0.425098	40	GRB2:274, EPHB2:337, SOS2:495, BCR:1065, NFKBIB:1436, VAV1:1450, NFAT5:2427, BAD:2560, CD19:2848, MAPK1:3180	0.963851
BIOCARTA_VDR_PATHWAY	-0.111169	0.182543	0.273	0.515222	12	NCOA3:1429, NCOA1:1976, NCOR1:2642, EP300:5771, TSC2:7049, MED1:7420, CARM1:8041, CREBBP:8594, RXRA:10107, KAT2B:10567	0.963851
REACTOME_TANDEM_PORE_DOMAIN_POTASSIUM_CHANNELS	-0.0807212	0.333102	0.274	0.669856	12	KCNK17:93, KCNK2:643, KCNK7:947, KCNK13:4597, KCNK6:6225, KCNK18:7334, KCNK16:8117, KCNK3:9307, KCNK4:14363, KCNK10:14492	0.963851
REACTOME_PHOSPHORYLATION_OF_THE_APC_C	-0.120843	0.0943859	0.275	0.380521	16	ANAPC7:452, ANAPC10:1079, ANAPC11:2097, ANAPC5:2643, CDC26:3558, PLK1:3662, CCNB1:4005, CDC16:5003, ANAPC4:6021, ANAPC2:7800	0.963851
PID_PI3KCI_PATHWAY	-0.0641029	0.141856	0.276	0.458182	44	HRAS:232, ARAP3:499, PLCG2:3316, SYK:3698, NRAS:3716, LYN:3927, SGK1:3936, INPP5D:3960, LCK:4174, PLCG1:4343	0.963851
REACTOME_RAF_MAP_KINASE_CASCADE	-0.0882727	0.33388	0.277	0.669856	10	HRAS:232, MAPK1:3180, NRAS:3716, KRAS:6164, RAF1:6547, MAPK3:9019, MAP2K2:9648, YWHAB:10829, MAP2K1:14328, CDK1:16469	0.963851
PID_AP1_PATHWAY	-0.0392263	0.25766	0.278	0.615809	70	MAF:118, MT2A:134, MMP9:182, EGR1:1237, CREB1:1287, GATA2:1475, ATF3:1635, NFATC3:1880, MYB:2120, CCND1:2245	0.963851
BIOCARTA_LYM_PATHWAY	-0.122377	0.180351	0.279	0.514552	10	CD34:1057, ICAM1:1644, VCAM1:4373, SELL:6960, ITGB1:7091, ITGAL:7668, ITGB2:10181, ITGA4:10844, IL8:12139, IL1A:12160	0.963851
REACTOME_INTERFERON_SIGNALING	-0.0413327	0.0823279	0.28	0.362198	150	EIF4A2:36, MT2A:134, IFIT1:639, IFI27:664, HLA-DPA1:697, GBP6:742, IFITM2:827, HLA-DPB1:828, EGR1:1237, XAF1:1512	0.963851
KEGG_ASTHMA	-0.0858615	0.116165	0.284	0.410107	28	HLA-DPA1:697, HLA-DPB1:828, FCER1A:1195, HLA-DMB:1282, IL10:2930, HLA-DQA2:2994, CD40LG:4132, EPX:4145, MS4A2:4727, IL4:4940	0.963851
BIOCARTA_FMLP_PATHWAY	-0.0653639	0.194281	0.285	0.535531	33	HRAS:232, RELA:510, MAP2K6:1427, PPP3CB:1823, NFATC3:1880, PIK3C2G:2210, NFATC2:2520, NCF1C:3136, MAPK1:3180, NFATC4:3459	0.963851
REACTOME_NEF_MEDIATES_DOWN_MODULATION_OF_CELL_SURFACE_RECEPTORS_BY_RECRUITING_THEM_TO_CLATHRIN_ADAPTERS	-0.082035	0.271534	0.286	0.624023	15	ATP6V1H:1588, AP1M2:1599, CD8B:3434, LCK:4174, AP2A1:5895, AP1G1:7802, AP2B1:8023, HLA-A:8278, AP1B1:9212, PACS1:10306	0.963851
REACTOME_TRAF3_DEPENDENT_IRF_ACTIVATION_PATHWAY	-0.0953722	0.216819	0.29	0.575027	14	SIKE1:1545, TRIM25:2601, MAVS:2955, IFNB1:4058, IFIH1:5125, EP300:5771, DDX58:6925, IRF3:7051, CREBBP:8594, IRF7:11006	0.963851
REACTOME_POST_TRANSLATIONAL_PROTEIN_MODIFICATION	-0.0436961	0.048245	0.292	0.286565	174	PIGO:47, PIGV:87, PIGS:143, MGAT2:200, GALNTL6:261, MAN2A1:294, EIF5A:341, PROZ:343, ARSK:628, DOLPP1:714	0.963851
REACTOME_PLATELET_AGGREGATION_PLUG_FORMATION	-0.0625393	0.20748	0.292	0.561323	34	GP1BA:123, GRB2:274, VWF:663, THPO:1534, BCAR1:2805, PTPN1:3130, MPL:3197, SYK:3698, GP9:4879, FGB:5247	0.963851
BIOCARTA_TCAPOPTOSIS_PATHWAY	-0.144693	0.113201	0.293	0.408137	10	TRA@:16, CD3G:902, CD3D:1583, CD3E:1922, FAS:6301, CD247:8527, FASLG:8832, CD4:10889, CD28:12492, CCR5:17784	0.963851
REACTOME_CIRCADIAN_REPRESSION_OF_EXPRESSION_BY_REV_ERBA	-0.0665686	0.280102	0.293	0.6347	22	TGS1:756, NCOA6:976, NCOA3:1429, NCOA1:1976, NCOR1:2642, CLOCK:4792, EP300:5771, NR1D1:6501, RORA:6513, MED1:7420	0.963851
REACTOME_INITIAL_TRIGGERING_OF_COMPLEMENT	-0.134994	0.105523	0.294	0.398848	12	C1QA:2300, C1QB:2589, C1QC:3623, CFD:3753, MBL2:4433, MASP2:4439, C1S:6044, C2:9237, CFB:9473, MASP1:10254	0.963851
REACTOME_RORA_ACTIVATES_CIRCADIAN_EXPRESSION	-0.0660863	0.272949	0.294	0.624023	23	TGS1:756, NCOA6:976, NCOA3:1429, NCOA1:1976, NCOR1:2642, CLOCK:4792, CPT1A:5389, EP300:5771, NR1D1:6501, RORA:6513	0.963851
KEGG_GLYCOSYLPHOSPHATIDYLINOSITOL_GPI_ANCHOR_BIOSYNTHESIS	-0.0813049	0.159724	0.295	0.482569	25	PIGO:47, PIGV:87, PIGS:143, PIGP:1740, PIGW:1818, PIGQ:1856, PIGK:2890, DPM2:3390, PIGY:3954, PIGN:4443	0.963851
BIOCARTA_TOB1_PATHWAY	-0.0721535	0.264268	0.298	0.622269	20	TRA@:16, TOB2:139, CD3G:902, CD3D:1583, CD3E:1922, TGFB1:4116, IL4:4940, TGFBR2:6286, IFNG:6308, CD247:8527	0.96753
REACTOME_FORMATION_OF_FIBRIN_CLOT_CLOTTING_CASCADE	-0.103097	0.0471929	0.3	0.286565	31	GP1BA:123, KLKB1:338, F8:340, VWF:663, PF4V1:1666, PF4:2030, KNG1:2229, PRCP:3530, SERPING1:4115, GP9:4879	0.967935
BIOCARTA_BLYMPHOCYTE_PATHWAY	-0.105578	0.225469	0.304	0.582368	11	ICAM1:1644, CR1:2858, CD80:3397, CR2:3977, HLA-DRB1:6983, ITGAL:7668, FCGR2B:8280, ITGB2:10181, PTPRC:12318, CD40:13679	0.974492
PID_INSULIN_GLUCOSE_PATHWAY	-0.0660791	0.262848	0.306	0.622269	24	STX4:358, VAMP2:764, STXBP4:956, GSK3B:2734, YWHAH:3425, PRKCI:4029, YWHAQ:5342, TBC1D4:5455, YWHAE:6525, RHOQ:6936	0.974492
BIOCARTA_FCER1_PATHWAY	-0.0645453	0.186878	0.312	0.524746	35	HRAS:232, GRB2:274, FCER1A:1195, VAV1:1450, PPP3CB:1823, NFATC3:1880, NFATC2:2520, MAPK1:3180, NFATC4:3459, SYK:3698	0.974492
BIOCARTA_TCR_PATHWAY	-0.057951	0.194434	0.313	0.535531	42	TRA@:16, HRAS:232, GRB2:274, RELA:510, CD3G:902, VAV1:1450, CD3D:1583, PPP3CB:1823, NFATC3:1880, CD3E:1922	0.974492
KEGG_STEROID_HORMONE_BIOSYNTHESIS	-0.103847	0.0173291	0.315	0.159328	44	SULT1E1:839, STS:939, CYP1A1:1399, UGT2B4:1568, CYP7A1:1687, HSD17B3:1712, CYP11A1:2082, COMT:2492, HSD17B2:2780, CYP7B1:3618	0.974492
REACTOME_EICOSANOID_LIGAND_BINDING_RECEPTORS	-0.0860467	0.265163	0.315	0.622269	14	TBXA2R:1063, PTGFR:1590, PTGER2:2261, CYSLTR2:2739, PTGER1:3248, PTGER4:4825, PTGER3:5053, LTB4R:11037, CYSLTR1:12037, PTGDR:12279	0.974492
BIOCARTA_DNAFRAGMENT_PATHWAY	-0.0758355	0.406439	0.318	0.728847	10	DFFA:1040, HMGB2:2556, TOP2A:3728, ENDOG:4172, CASP3:5602, DFFB:10127, GZMB:11527, HMGB1:13460, TOP2B:14000, CASP7:16181	0.974492
KEGG_CYTOSOLIC_DNA_SENSING_PATHWAY	-0.0716575	0.0665647	0.319	0.331099	55	RELA:510, RIPK3:1391, NFKBIB:1436, CXCL10:1441, IFNA8:2417, IFNA2:2718, ZBP1:2737, IFNA4:2864, IFNA16:2934, MAVS:2955	0.974492
REACTOME_MEIOTIC_RECOMBINATION	-0.0602328	0.116486	0.321	0.410107	57	TEX15:58, HIST1H2BF:382, MSH4:541, MLH3:542, HIST1H2BO:568, SPO11:1484, HIST2H3D:1733, RBBP8:1761, HIST3H2BB:2273, NBN:2340	0.974492
REACTOME_RESPONSE_TO_ELEVATED_PLATELET_CYTOSOLIC_CA2_	-0.0405113	0.22336	0.321	0.581421	76	F8:340, STX4:358, LAMP2:411, HSPA5:645, VWF:663, EGF:751, TUBA4A:781, MMRN1:965, PLEK:1888, PF4:2030	0.974492
KEGG_ALLOGRAFT_REJECTION	-0.0853426	0.0767612	0.327	0.35548	36	IL12A:207, HLA-DPA1:697, HLA-DPB1:828, HLA-DMB:1282, HLA-F:1852, PRF1:1966, IL10:2930, HLA-DQA2:2994, IL12B:3004, CD80:3397	0.974492
REACTOME_RECRUITMENT_OF_MITOTIC_CENTROSOME_PROTEINS_AND_COMPLEXES	-0.0461038	0.217772	0.327	0.575027	60	NUMA1:186, CNTRL:234, CEP250:486, CENPJ:615, CDK5RAP2:738, TUBA4A:781, CEP192:921, DYNC1I2:1033, PCNT:1729, CEP135:2173	0.974492
REACTOME_ACYL_CHAIN_REMODELLING_OF_PC	-0.0735732	0.232579	0.328	0.588868	22	PLA2G4C:485, PLA2G1B:2588, PLA2G4F:3142, PLA2G4D:3299, PLA2G2D:3467, PLA2G10:3938, PNPLA8:4109, PLA2G5:4126, PLA2G16:4547, LPCAT2:7018	0.974492
KEGG_GLYCOSPHINGOLIPID_BIOSYNTHESIS_GANGLIO_SERIES	-0.0778867	0.296515	0.329	0.654011	15	GLB1:1208, HEXB:1214, ST6GALNAC6:1667, ST6GALNAC3:3561, ST8SIA1:4098, B3GALT4:4426, SLC33A1:5517, HEXA:7846, ST6GALNAC4:11099, B4GALNT1:11297	0.974492
KEGG_DRUG_METABOLISM_OTHER_ENZYMES	-0.0773007	0.0872279	0.334	0.369059	41	UGT2B4:1568, CYP2A6:2241, TPMT:2348, XDH:2567, HPRT1:2726, CDA:2966, UPB1:3165, TYMP:3490, DPYS:3511, UGT2A3:3910	0.974492
REACTOME_BETA_DEFENSINS	-0.084739	0.08313	0.337	0.363123	35	DEFB127:133, TLR1:445, DEFB121:1479, DEFB116:1652, DEFB113:1723, DEFB104B:2282, DEFB132:2541, DEFB126:3122, DEFB128:3549, DEFB134:4159	0.974492
BIOCARTA_MONOCYTE_PATHWAY	-0.138169	0.130396	0.338	0.443206	10	ICAM1:1644, ITGAM:4072, SELL:6960, ITGB1:7091, SELE:7106, ITGAL:7668, SELP:7957, CD44:8062, ITGB2:10181, ITGA4:10844	0.974492
REACTOME_ACTIVATED_TLR4_SIGNALLING	-0.0388823	0.21408	0.34	0.572373	86	TLR4:310, IRAK2:333, TLR1:445, RELA:510, TICAM1:658, TAB1:936, CREB1:1287, MAP2K6:1427, NFKBIB:1436, TRAF6:1621	0.974492
REACTOME_BMAL1_CLOCK_NPAS2_ACTIVATES_CIRCADIAN_EXPRESSION	-0.0459093	0.347839	0.341	0.683905	35	TGS1:756, DBP:878, NCOA6:976, NCOA3:1429, NCOA1:1976, NCOR1:2642, ARNTL2:3543, CLOCK:4792, PER2:5726, EP300:5771	0.974492
KEGG_T_CELL_RECEPTOR_SIGNALING_PATHWAY	-0.0427638	0.133358	0.342	0.448505	104	HRAS:232, GRB2:274, GRAP2:275, SOS2:495, RELA:510, CD3G:902, CD8A:1266, NFKBIB:1436, VAV1:1450, CD3D:1583	0.974492
BIOCARTA_COMP_PATHWAY	-0.14331	0.035398	0.345	0.243722	18	C1R:1763, C1QA:2300, C1QB:2589, C5:3534, C1QC:3623, CFD:3753, MBL2:4433, MASP2:4439, C4B:5014, C1S:6044	0.974492
KEGG_GALACTOSE_METABOLISM	-0.062648	0.269265	0.347	0.624023	26	MGAM:534, G6PC2:1043, GLA:1121, GLB1:1208, LALBA:1978, LCT:2098, GALT:4127, PFKP:4928, PFKM:6350, HK1:6592	0.974492
REACTOME_PI_METABOLISM	-0.0374122	0.385978	0.349	0.714426	45	MTM1:264, INPP4B:387, MTMR2:1177, PIK3R4:1577, MTMR7:2197, PIK3C2G:2210, PI4K2A:2522, VAC14:2690, MTMR1:3260, PI4KA:3283	0.974492
PID_CXCR3_PATHWAY	-0.0636979	0.153796	0.35	0.475912	42	HRAS:232, CXCL11:552, MAP2K6:1427, CXCL10:1441, PF4:2030, MAPK1:3180, NRAS:3716, ARRB1:3761, GNB1:3794, CXCL9:4230	0.974492
PID_FAS_PATHWAY	-0.0531678	0.263691	0.351	0.622269	37	CASP10:695, MAP2K6:1427, EZR:2022, FADD:2585, BIRC2:2630, MAPK9:3695, SYK:3698, BID:4207, RFC1:4276, IKBKB:4402	0.974492
REACTOME_SYNTHESIS_SECRETION_AND_INACTIVATION_OF_GLP1	-0.0708376	0.312184	0.352	0.661743	17	FFAR1:1283, GPR119:1553, SEC11C:2397, GNG13:4301, GRP:5482, SPCS2:5754, PCSK1:5927, SPCS1:6434, SEC11A:8255, DPP4:8296	0.974492
BIOCARTA_IL12_PATHWAY	-0.0705139	0.252581	0.353	0.611737	22	TRA@:16, IL12A:207, CD3G:902, MAP2K6:1427, CD3D:1583, CD3E:1922, IL12B:3004, TYK2:3163, ETV5:3766, IFNG:6308	0.974492
REACTOME_PASSIVE_TRANSPORT_BY_AQUAPORINS	-0.10164	0.265852	0.355	0.622269	10	AQP10:1176, AQP5:1699, AQP8:2418, AQP6:4655, AQP7:8170, AQP9:9036, AQP2:9652, AQP3:10028, MIP:13280, AQP4:17563	0.9748
REACTOME_SHC1_EVENTS_IN_EGFR_SIGNALING	-0.068259	0.360247	0.358	0.694412	15	HRAS:232, GRB2:274, EGF:751, MAPK1:3180, NRAS:3716, KRAS:6164, RAF1:6547, MAPK3:9019, SHC1:9460, MAP2K2:9648	0.977837
KEGG_N_GLYCAN_BIOSYNTHESIS	-0.0738573	0.0869968	0.362	0.369059	45	MGAT2:200, MAN2A1:294, DOLPP1:714, MGAT3:2422, ST6GAL1:2670, ALG14:2702, ALG10:2962, DPM1:3083, DPM2:3390, MAN1A2:3594	0.981112
REACTOME_SYNTHESIS_OF_GLYCOSYLPHOSPHATIDYLINOSITOL_GPI	-0.0726898	0.299701	0.363	0.654731	17	PIGO:47, PIGV:87, PIGP:1740, PIGW:1818, PIGQ:1856, DPM2:3390, PIGN:4443, PIGL:4692, PIGF:6010, PIGH:8460	0.981112
REACTOME_ACTIVATION_OF_CHAPERONES_BY_ATF6_ALPHA	-0.0928234	0.286569	0.367	0.643685	11	HSPA5:645, CALR:1909, NFYA:3976, HSP90B1:4103, MBTPS2:5938, DDIT3:7119, MBTPS1:9042, ATF4:9199, XBP1:10824, NFYB:15558	0.984684
REACTOME_BILE_ACID_AND_BILE_SALT_METABOLISM	-0.107476	0.0534506	0.369	0.303948	27	SLCO1B3:726, SLCO1A2:1175, SLC10A1:1547, CYP7A1:1687, ABCB11:1829, CYP27A1:2128, SLC27A5:2270, FABP6:2574, CYP7B1:3618, AKR1C4:4130	0.984684
SA_CASPASE_CASCADE	-0.0727619	0.272494	0.373	0.624023	19	CASP10:695, DFFA:1040, SREBF2:1256, APAF1:1565, PRF1:1966, BIRC2:2630, CASP3:5602, CASP9:5854, FAS:6301, XIAP:7998	0.984684
REACTOME_PROTEOLYTIC_CLEAVAGE_OF_SNARE_COMPLEX_PROTEINS	-0.0702651	0.362873	0.375	0.698422	14	STX4:358, VAMP2:764, STX11:809, STX10:908, VAMP1:951, STX6:6797, STX3:8578, STX1A:8886, STX12:8984, STX16:13533	0.984684
REACTOME_TRAFFICKING_AND_PROCESSING_OF_ENDOSOMAL_TLR	-0.0834048	0.317281	0.377	0.66546	12	CTSL1:199, TLR3:2085, CNPY3:3741, HSP90B1:4103, TLR9:8074, LGMN:8580, CTSS:9257, TLR8:9352, TLR7:10290, CTSK:10528	0.984684
BIOCARTA_PTDINS_PATHWAY	-0.0632508	0.315994	0.38	0.66546	21	BAD:2560, GSK3B:2734, VAV2:2748, LYN:3927, EEA1:4261, PLCG1:4343, GSK3A:4854, PFKP:4928, PDPK1:5447, AP2A1:5895	0.984684
REACTOME_IMMUNE_SYSTEM	-0.0200227	0.057156	0.382	0.314851	838	MEFV:17, EIF4A2:36, ICAM3:102, DEFB127:133, MT2A:134, PSMA1:136, ICAM2:140, CTSL1:199, IL2RB:213, LBP:214	0.984684
KEGG_RIG_I_LIKE_RECEPTOR_SIGNALING_PATHWAY	-0.0544342	0.113679	0.382	0.408137	71	IL12A:207, RELA:510, CASP10:695, NFKBIB:1436, CXCL10:1441, SIKE1:1545, TRAF6:1621, IFNA8:2417, FADD:2585, TRIM25:2601	0.984684
PID_TAP63_PATHWAY	-0.0366746	0.352143	0.386	0.68895	54	EVPL:104, OGG1:107, ABL1:660, DST:755, NQO1:1735, TP63:2065, ITGB4:3109, PRKCD:3384, PLK1:3662, HBP1:3686	0.984684
KEGG_NATURAL_KILLER_CELL_MEDIATED_CYTOTOXICITY	-0.0386875	0.140208	0.389	0.457105	123	ICAM2:140, HRAS:232, GRB2:274, SOS2:495, NCR3:734, VAV1:1450, ICAM1:1644, PPP3CB:1823, NFATC3:1880, PRF1:1966	0.984684
ST_G_ALPHA_S_PATHWAY	-0.0769861	0.286586	0.398	0.643685	16	BFAR:986, CREB1:1287, CREB3:2039, MAPK1:3180, CREB5:4167, RAPGEF3:5306, SNX13:6113, GAST:6521, RAF1:6547, ASAH1:9466	0.984684
REACTOME_SIGNALING_BY_RHO_GTPASES	-0.0292396	0.293556	0.4	0.652461	109	FGD4:226, AKAP13:271, PLEKHG2:454, SOS2:495, ARAP3:499, FGD3:578, PREX1:722, BCR:1065, ARHGEF3:1189, ARHGEF6:1235	0.984684
PID_INTEGRIN_CS_PATHWAY	-0.0759654	0.180375	0.403	0.514552	26	ITGB7:402, ITGA7:857, ITGA10:1173, ITGAE:1424, ITGAX:2027, ITGA6:2677, ITGB4:3109, ITGAM:4072, ITGA11:5134, ITGA5:5598	0.984684
REACTOME_DEFENSINS	-0.0685661	0.138958	0.404	0.457105	39	DEFB127:133, TLR1:445, DEFB121:1479, DEFB116:1652, DEFB113:1723, DEFB104B:2282, DEFB132:2541, DEFB126:3122, DEFB128:3549, DEFB134:4159	0.984684
REACTOME_PLATELET_ACTIVATION_SIGNALING_AND_AGGREGATION	-0.0215148	0.317567	0.405	0.66546	184	GP1BA:123, GRB2:274, F8:340, STX4:358, LAMP2:411, HSPA5:645, VWF:663, GNG8:748, EGF:751, TUBA4A:781	0.984684
PID_ATM_PATHWAY	-0.0632978	0.215763	0.408	0.574923	32	RAD17:194, ABL1:660, RBBP8:1761, NBN:2340, FANCD2:2474, FAM175A:2487, BLM:2660, RAD9A:3755, UIMC1:4094, BID:4207	0.984684
SA_B_CELL_RECEPTOR_COMPLEXES	-0.0576282	0.328823	0.408	0.669856	24	HRAS:232, GRB2:274, BCR:1065, VAV1:1450, VAV2:2748, MAPK1:3180, SYK:3698, LYN:3927, BLNK:4362, ATF2:8575	0.984684
REACTOME_UNFOLDED_PROTEIN_RESPONSE	-0.0350675	0.288751	0.411	0.646277	77	ATP6V0D1:268, EXOSC2:349, EXTL3:509, HSPA5:645, DDX11:671, CTDSP2:1131, FKBP14:1300, ATF3:1635, CALR:1909, SYVN1:2470	0.984684
PID_SYNDECAN_2_PATHWAY	-0.0487909	0.347627	0.412	0.683905	31	HRAS:232, EPHB2:337, SDCBP:635, EPB41:1100, EZR:2022, SDC2:2159, KNG1:2229, LAMA1:2578, MAPK1:3180, PRKCD:3384	0.984684
REACTOME_TRYPTOPHAN_CATABOLISM	-0.103953	0.232691	0.416	0.588868	11	AADAT:598, CCBL2:702, IDO2:2243, IDO1:3472, CCBL1:5102, KMO:6295, KYNU:9344, ACMSD:10340, AFMID:12244, HAAO:15379	0.984684
KEGG_JAK_STAT_SIGNALING_PATHWAY	-0.0326227	0.173126	0.427	0.502539	148	EPO:168, IL12A:207, IL2RB:213, GRB2:274, SOS2:495, IL21R:669, CSF2RB:686, IL24:890, IL9R:1004, CSF3R:1056	0.984684
KEGG_FC_EPSILON_RI_SIGNALING_PATHWAY	-0.0322815	0.325684	0.427	0.669485	78	HRAS:232, GRB2:274, SOS2:495, FCER1A:1195, MAP2K6:1427, VAV1:1450, PLA2G1B:2588, VAV2:2748, MAPK1:3180, RAC2:3186	0.984684
REACTOME_REGULATION_OF_COMPLEMENT_CASCADE	-0.109598	0.188804	0.431	0.526837	12	C4BPB:548, C4BPA:2473, CR1:2858, CFHR3:4265, PROS1:5168, CFI:5510, CFH:8993, C2:9237, CFB:9473, CD46:12497	0.984684
REACTOME_SYNTHESIS_OF_PIPS_AT_THE_GOLGI_MEMBRANE	-0.0548342	0.462365	0.432	0.768786	15	PIK3R4:1577, PIK3C2G:2210, PI4K2A:2522, VAC14:2690, PI4KA:3283, TPTE2:4160, PIK3C2A:8681, FIG4:8784, SACM1L:9231, PIKFYVE:11606	0.984684
KEGG_STARCH_AND_SUCROSE_METABOLISM	-0.0643504	0.149624	0.433	0.46753	42	SI:497, MGAM:534, AMY1A:1015, G6PC2:1043, UGT2B4:1568, GPI:1811, AMY2A:1942, ENPP3:2010, UGT2A3:3910, UGT2B10:4193	0.984684
BIOCARTA_GRANULOCYTES_PATHWAY	-0.0883212	0.27038	0.435	0.624023	13	ICAM1:1644, C5:3534, ITGAM:4072, SELPLG:4495, IFNG:6308, SELL:6960, ITGAL:7668, SELP:7957, ITGB2:10181, TNF:11922	0.984684
PID_AMB2_NEUTROPHILS_PATHWAY	-0.0351036	0.448721	0.441	0.761575	39	MMP9:182, MST1R:1618, ICAM1:1644, PLAUR:1718, ROCK1:2501, PLAT:2674, LYN:3927, ITGAM:4072, LCK:4174, APOB:4480	0.984684
REACTOME_PEPTIDE_HORMONE_BIOSYNTHESIS	-0.106299	0.168659	0.444	0.498332	14	INHBC:446, CGB:1125, POMC:2222, CGB8:2797, CGA:3563, INHBE:5424, PCSK1:5927, LHB:7167, CGB5:7686, INHBA:7801	0.984684
REACTOME_COMMON_PATHWAY	-0.0975943	0.2063	0.445	0.561264	14	PF4V1:1666, PF4:2030, PROS1:5168, FGB:5247, THBD:6206, F5:6403, PROC:8436, FGG:8769, FGA:8787, SERPINC1:9222	0.984684
REACTOME_SYNTHESIS_OF_BILE_ACIDS_AND_BILE_SALTS_VIA_24_HYDROXYCHOLESTEROL	-0.0703758	0.441057	0.448	0.758641	10	CYP27A1:2128, SLC27A5:2270, AKR1C4:4130, CYP8B1:4602, CYP46A1:5544, AMACR:9823, HSD3B7:10911, CYP39A1:13072, SLC27A2:14245, AKR1D1:16814	0.984684
REACTOME_MYD88_MAL_CASCADE_INITIATED_ON_PLASMA_MEMBRANE	-0.0353656	0.284671	0.452	0.64164	77	TLR4:310, IRAK2:333, TLR1:445, RELA:510, TAB1:936, CREB1:1287, MAP2K6:1427, NFKBIB:1436, TRAF6:1621, TLR6:2179	0.984684
REACTOME_CHONDROITIN_SULFATE_DERMATAN_SULFATE_METABOLISM	-0.0381132	0.366803	0.453	0.701835	47	IDS:567, NCAN:790, IDUA:1143, HEXB:1214, GPC6:1755, SDC2:2159, SDC3:2285, CHST13:3053, CSGALNACT1:3265, CHST9:3527	0.984684
BIOCARTA_HIF_PATHWAY	-0.055071	0.460434	0.459	0.768786	15	EPO:168, CREB1:1287, EP300:5771, HIF1A:5969, HSP90AA1:7284, ASPH:7444, NOS3:8166, LDHA:8483, EDN1:8545, P4HB:8678	0.984684
PID_NFKAPPAB_ATYPICAL_PATHWAY	-0.0749418	0.299575	0.462	0.654731	16	RELA:510, CSNK2A1:727, ARRB2:1762, SYK:3698, LCK:4174, IKBKB:4402, NFKBIA:4482, CSNK2A2:6660, PIK3R1:8339, SRC:11629	0.984684
PID_IL12_STAT4_PATHWAY	-0.0469882	0.358139	0.463	0.693487	32	CD3G:902, CD3D:1583, PPP3CB:1823, CD3E:1922, PRF1:1966, CD80:3397, MAPK9:3695, ETV5:3766, TGFB1:4116, PIAS2:5352	0.984684
BIOCARTA_HCMV_PATHWAY	-0.0606541	0.386841	0.466	0.714426	17	RELA:510, CREB1:1287, MAP2K6:1427, MAPK1:3180, MAP2K3:4437, RB1:6421, AKT1:7002, PIK3R1:8339, MAPK3:9019, MAP2K2:9648	0.984684
REACTOME_REMOVAL_OF_THE_FLAP_INTERMEDIATE_FROM_THE_C_STRAND	-0.0843432	0.355844	0.47	0.69219	10	DNA2:301, POLD3:3757, POLD4:5706, PCNA:6024, RPA1:6219, RPA3:7330, POLD1:11119, RPA2:11656, POLD2:12331, FEN1:16517	0.984684
REACTOME_N_GLYCAN_ANTENNAE_ELONGATION_IN_THE_MEDIAL_TRANS_GOLGI	-0.0934458	0.170135	0.472	0.498332	18	MGAT2:200, MAN2A1:294, ST8SIA3:1481, MGAT3:2422, ST6GAL1:2670, B4GALT4:5106, ST8SIA6:5167, B4GALT5:6658, FUT8:7899, B4GALT3:8762	0.984684
BIOCARTA_PML_PATHWAY	-0.0526039	0.45295	0.474	0.7657	17	HRAS:232, SP100:1757, PRAM1:2011, SUMO1:4080, SIRT1:5350, FAS:6301, RB1:6421, PML:7994, CREBBP:8594, FASLG:8832	0.984684
KEGG_PRIMARY_BILE_ACID_BIOSYNTHESIS	-0.0754165	0.296525	0.475	0.654011	16	CYP7A1:1687, CYP27A1:2128, SLC27A5:2270, CYP7B1:3618, AKR1C4:4130, CYP8B1:4602, CYP46A1:5544, ACOX2:6889, AMACR:9823, CH25H:9906	0.984684
REACTOME_REPAIR_SYNTHESIS_FOR_GAP_FILLING_BY_DNA_POL_IN_TC_NER	-0.0757239	0.326793	0.475	0.669485	14	POLE2:508, POLD3:3757, POLD4:5706, PCNA:6024, RPA1:6219, RPA3:7330, RFC4:7697, RFC3:8122, POLE:9459, RFC2:10568	0.984684
BIOCARTA_CLASSIC_PATHWAY	-0.132406	0.0984653	0.476	0.388391	13	C1R:1763, C1QA:2300, C1QB:2589, C5:3534, C1QC:3623, C4B:5014, C1S:6044, C2:9237, C7:9299, C6:10374	0.984684
REACTOME_SIGNALING_BY_CONSTITUTIVELY_ACTIVE_EGFR	-0.0585742	0.432403	0.479	0.751851	15	HRAS:232, GRB2:274, EGF:751, NRAS:3716, PLCG1:4343, GAB1:5133, KRAS:6164, HSP90AA1:7284, PIK3R1:8339, SHC1:9460	0.984684
BIOCARTA_LAIR_PATHWAY	-0.0853885	0.223129	0.481	0.581421	17	ICAM1:1644, KNG1:2229, C5:3534, VCAM1:4373, SELPLG:4495, ITGB1:7091, ITGAL:7668, SELP:7957, IL6:9269, C7:9299	0.984684
REACTOME_PTM_GAMMA_CARBOXYLATION_HYPUSINE_FORMATION_AND_ARYLSULFATASE_ACTIVATION	-0.0551897	0.330437	0.482	0.669856	26	EIF5A:341, PROZ:343, ARSK:628, STS:939, DOHH:2236, EIF5A2:3072, ARSB:4150, GGCX:5084, PROS1:5168, ARSI:5889	0.984684
PID_FCER1_PATHWAY	-0.0342711	0.355641	0.482	0.69219	61	PTPN13:196, HRAS:232, GRB2:274, RELA:510, FCER1A:1195, VAV1:1450, LAT2:1520, PLD2:2346, NFATC2:2520, PLA2G1B:2588	0.984684
REACTOME_ANTIGEN_ACTIVATES_B_CELL_RECEPTOR_LEADING_TO_GENERATION_OF_SECOND_MESSENGERS	-0.0476983	0.400276	0.483	0.727276	26	GRB2:274, VAV1:1450, CD79A:1457, CD19:2848, ITPR2:3070, PLCG2:3316, SYK:3698, LYN:3927, PLCG1:4343, BLNK:4362	0.984684
REACTOME_ACTIVATION_OF_CHAPERONE_GENES_BY_XBP1S	-0.03718	0.388934	0.484	0.716221	45	ATP6V0D1:268, EXTL3:509, DDX11:671, CTDSP2:1131, FKBP14:1300, SYVN1:2470, C19orf10:2510, ADD1:2937, YIF1A:3531, TATDN2:3785	0.984684
REACTOME_CD28_DEPENDENT_VAV1_PATHWAY	-0.0532011	0.560299	0.484	0.824957	10	GRB2:274, VAV1:1450, CD80:3397, LCK:4174, CD86:5722, CD28:12492, RAC1:13378, PAK1:14337, FYN:14542, PAK2:16623	0.984684
ST_TUMOR_NECROSIS_FACTOR_PATHWAY	-0.039945	0.457	0.485	0.768786	29	TNFAIP3:877, NFKBIB:1436, FADD:2585, BIRC2:2630, BAG4:2996, MAP3K7:3578, NR2C2:3962, NFKBIA:4482, TRADD:4730, TONSL:4807	0.984684
KEGG_DRUG_METABOLISM_CYTOCHROME_P450	-0.0656218	0.0793894	0.487	0.358031	60	GSTK1:616, CYP2B6:711, FMO1:972, FMO5:1071, UGT2B4:1568, ALDH3B1:1933, CYP2A6:2241, GSTT1:2464, MGST3:3025, GSTA1:3321	0.984684
PID_HDAC_CLASSII_PATHWAY	-0.0416805	0.422362	0.49	0.743496	31	CAMK4:1384, GATA2:1475, HDAC11:2442, HDAC6:3023, ADRBK1:3290, GATA1:3734, GNB1:3794, SUMO1:4080, RANBP2:4712, HDAC7:5576	0.984684
REACTOME_COMPLEMENT_CASCADE	-0.0911764	0.0952512	0.491	0.381602	28	C4BPB:548, C1QA:2300, C4BPA:2473, C1QB:2589, CR1:2858, C5:3534, C1QC:3623, CFD:3753, CFHR3:4265, MBL2:4433	0.984684
REACTOME_GAMMA_CARBOXYLATION_TRANSPORT_AND_AMINO_TERMINAL_CLEAVAGE_OF_PROTEINS	-0.0791162	0.38644	0.492	0.714426	10	PROZ:343, GGCX:5084, PROS1:5168, F7:6988, PROC:8436, F10:9669, F9:10429, FURIN:10762, F2:11579, VKORC1:13646	0.984684
REACTOME_ACTIVATION_OF_THE_PRE_REPLICATIVE_COMPLEX	-0.0649937	0.218387	0.495	0.57546	30	POLE2:508, RPA4:679, ORC3:2258, MCM7:2958, ORC2:3482, ORC4:3699, MCM4:4141, CDC45:4739, ORC5:4830, POLA2:5046	0.984684
KEGG_OLFACTORY_TRANSDUCTION	-0.0565471	0.000215274	0.498	0.01448	374	OR6A2:124, OR4Q3:151, OR1J2:191, OR1L6:205, OR13C3:222, OR13C9:283, OR52N5:285, OR2AG1:286, OR2Y1:347, OR1Q1:418	0.984684
NABA_MATRISOME_ASSOCIATED	-0.018255	0.104727	0.498	0.398848	722	MMP8:19, CLEC4F:20, MEGF9:49, TMPRSS15:57, LGALS4:85, FCN3:141, CLEC11A:144, CST8:164, EPO:168, MMP9:182	0.984684
BIOCARTA_BCR_PATHWAY	-0.0435017	0.402375	0.5	0.727276	31	HRAS:232, GRB2:274, VAV1:1450, CD79A:1457, PPP3CB:1823, NFATC3:1880, NFATC2:2520, NFATC4:3459, SYK:3698, LYN:3927	0.984684
REACTOME_ROLE_OF_DCC_IN_REGULATING_APOPTOSIS	-0.0629453	0.490781	0.504	0.78478	10	DAPK2:3145, DAPK3:4607, CASP3:5602, CASP9:5854, UNC5A:6857, DAPK1:7565, UNC5B:9173, DCC:13459, MAGED1:14413, APPL1:14569	0.984684
BIOCARTA_AKT_PATHWAY	-0.0496095	0.431594	0.509	0.751843	21	RELA:510, BAD:2560, YWHAH:3425, IKBKB:4402, NFKBIA:4482, PDPK1:5447, CASP9:5854, IKBKG:6598, AKT1:7002, HSP90AA1:7284	0.984684
REACTOME_SYNTHESIS_OF_BILE_ACIDS_AND_BILE_SALTS	-0.0705753	0.287165	0.513	0.643855	19	CYP7A1:1687, ABCB11:1829, CYP27A1:2128, SLC27A5:2270, CYP7B1:3618, AKR1C4:4130, CYP8B1:4602, CYP46A1:5544, ACOX2:6889, AMACR:9823	0.984684
BIOCARTA_AMI_PATHWAY	-0.0636169	0.324977	0.516	0.669485	20	COL4A4:478, COL4A3:880, PLAT:2674, AHSP:2764, COL4A5:3942, PROS1:5168, FGB:5247, F7:6988, F2R:7881, PROC:8436	0.984684
BIOCARTA_MITOCHONDRIA_PATHWAY	-0.0484654	0.442291	0.517	0.758755	21	DFFA:1040, APAF1:1565, BIRC2:2630, ENDOG:4172, BID:4207, CASP3:5602, CASP9:5854, BAK1:5981, BIK:7490, XIAP:7998	0.984684
KEGG_METABOLISM_OF_XENOBIOTICS_BY_CYTOCHROME_P450	-0.0596193	0.120254	0.519	0.421053	57	GSTK1:616, CYP2B6:711, CYP1A1:1399, UGT2B4:1568, ALDH3B1:1933, GSTT1:2464, CYP2S1:2685, MGST3:3025, GSTA1:3321, GSTP1:3806	0.984684
REACTOME_APC_C_CDC20_MEDIATED_DEGRADATION_OF_CYCLIN_B	-0.0703785	0.329967	0.519	0.669856	16	ANAPC7:452, ANAPC10:1079, ANAPC11:2097, ANAPC5:2643, CDC26:3558, CCNB1:4005, CDC16:5003, ANAPC4:6021, ANAPC2:7800, UBE2E1:7936	0.984684
BIOCARTA_TID_PATHWAY	-0.0437178	0.509693	0.519	0.799248	19	TAX1BP3:51, RELA:510, IKBKB:4402, HSPA1A:4468, NFKBIA:4482, IFNGR1:4924, IFNG:6308, RB1:6421, USH1C:7518, IFNGR2:7669	0.984684
REACTOME_OLFACTORY_SIGNALING_PATHWAY	-0.0549742	0.000919771	0.521	0.0348676	315	OR6A2:124, OR4Q3:151, OR1J2:191, OR1L6:205, OR52N5:285, OR2AG1:286, OR2Y1:347, OR1Q1:418, OR51B6:489, OR1L3:609	0.984684
REACTOME_SIGNALING_BY_HIPPO	-0.0466356	0.470572	0.521	0.773225	20	SAV1:500, STK4:1660, STK3:2542, MOB1A:4286, LATS1:4810, CASP3:5602, AMOTL1:6172, YWHAE:6525, WWTR1:6723, YAP1:7233	0.984684
REACTOME_FACILITATIVE_NA_INDEPENDENT_GLUCOSE_TRANSPORTERS	-0.0605383	0.467911	0.523	0.772597	12	SLC2A11:1069, SLC2A9:4220, SLC2A8:4826, SLC2A5:5470, SLC2A10:5893, SLC2A7:8395, SLC2A6:8418, SLC2A2:8990, SLC2A12:10076, SLC2A4:12475	0.984684
BIOCARTA_CSK_PATHWAY	-0.0374859	0.543043	0.523	0.81604	22	TRA@:16, CD3G:902, CD3D:1583, CD3E:1922, GNB1:3794, LCK:4174, HLA-DRB1:6983, PRKAR2B:7487, ZAP70:8099, CD247:8527	0.984684
KEGG_ENDOMETRIAL_CANCER	-0.0359131	0.371217	0.524	0.704414	52	HRAS:232, GRB2:274, SOS2:495, EGF:751, AXIN2:973, CTNNA1:1128, CCND1:2245, BAD:2560, GSK3B:2734, TCF7:2758	0.984684
KEGG_LEUKOCYTE_TRANSENDOTHELIAL_MIGRATION	-0.0273576	0.321394	0.525	0.669485	111	MMP9:182, CYBB:960, CTNNA1:1128, VAV1:1450, ICAM1:1644, CLDN17:1657, CLDN16:1948, EZR:2022, ACTB:2032, TXK:2364	0.984684
KEGG_GRAFT_VERSUS_HOST_DISEASE	-0.0537504	0.271712	0.526	0.624023	35	HLA-DPA1:697, HLA-DPB1:828, HLA-DMB:1282, HLA-F:1852, PRF1:1966, HLA-DQA2:2994, CD80:3397, CD86:5722, KIR3DL2:6263, FAS:6301	0.984684
KEGG_VASOPRESSIN_REGULATED_WATER_REABSORPTION	-0.0319665	0.484807	0.533	0.780465	40	STX4:358, VAMP2:764, ADCY6:872, DYNC1I2:1033, CREB3L3:1281, CREB1:1287, ADCY9:1845, CREB3:2039, RAB5B:2370, DYNC1I1:3423	0.984684
REACTOME_ETHANOL_OXIDATION	-0.0796793	0.383069	0.535	0.712609	10	ACSS2:2498, ALDH1A1:2617, ADH4:4388, ADH1C:4668, ADH6:7185, ADH7:7596, ALDH2:9363, ADH1B:11494, ACSS1:15662, ADH1A:16418	0.984684
BIOCARTA_AKAP13_PATHWAY	-0.0495532	0.5875	0.535	0.836216	10	AKAP13:271, PRKAG1:368, GNA13:1398, LPAR2:2445, PRKAR2B:7487, LPAR1:7564, PRKACB:14575, LPAR3:14869, PRKAR2A:18787, GNA12:18919	0.984684
BIOCARTA_ASBCELL_PATHWAY	-0.0647933	0.437217	0.537	0.755159	12	IL10:2930, CD80:3397, CD40LG:4132, IL4:4940, FAS:6301, HLA-DRB1:6983, FASLG:8832, CD4:10889, CD28:12492, IL2:13390	0.984684
REACTOME_LOSS_OF_NLP_FROM_MITOTIC_CENTROSOMES	-0.0305263	0.442904	0.537	0.758755	53	CNTRL:234, CEP250:486, CENPJ:615, CDK5RAP2:738, TUBA4A:781, CEP192:921, DYNC1I2:1033, PCNT:1729, CEP135:2173, SSNA1:2219	0.984684
KEGG_FATTY_ACID_METABOLISM	-0.0695295	0.119512	0.539	0.419604	42	ECI2:1191, CYP4A11:1319, ACADS:1337, GCDH:1447, CYP4A22:2449, EHHADH:3447, CPT2:3643, ADH4:4388, ADH1C:4668, CPT1C:4728	0.984684
REACTOME_GLYCOSPHINGOLIPID_METABOLISM	-0.0541636	0.254852	0.542	0.613372	37	ARSK:628, STS:939, GLA:1121, GLB1:1208, HEXB:1214, ASAH2:1988, NEU3:3032, SMPD4:3184, ARSB:4150, PSAP:5213	0.984684
REACTOME_NOTCH1_INTRACELLULAR_DOMAIN_REGULATES_TRANSCRIPTION	-0.0377657	0.409185	0.543	0.730112	40	MAML3:933, MAML2:963, CCNC:1165, MAMLD1:1181, HDAC11:2442, NCOR1:2642, FBXW7:2901, HDAC6:3023, CUL1:3192, CDK8:3649	0.984684
REACTOME_SHC_MEDIATED_SIGNALLING	-0.0554303	0.457513	0.543	0.768786	15	HRAS:232, GRB2:274, MAPK1:3180, NRAS:3716, KRAS:6164, RAF1:6547, SHC2:7951, MAPK3:9019, SHC1:9460, MAP2K2:9648	0.984684
BIOCARTA_GLYCOLYSIS_PATHWAY	-0.0672543	0.461586	0.548	0.768786	10	PGK1:1743, GPI:1811, HK1:6592, PFKL:8494, PGAM1:8590, TPI1:8643, GAPDH:8737, ENO1:11402, ALDOB:13082, PKLR:15315	0.984684
PID_AR_NONGENOMIC_PATHWAY	-0.0350963	0.513427	0.549	0.799608	29	HRAS:232, CREB1:1287, PLCB3:1684, MAPK1:3180, PLCG2:3316, GNRH1:3442, PELP1:3446, GNB1:3794, GNAZ:4291, PLCG1:4343	0.984684
REACTOME_PACKAGING_OF_TELOMERE_ENDS	-0.0369998	0.469323	0.551	0.772931	32	HIST1H2BF:382, HIST1H2BO:568, ACD:641, HIST3H2BB:2273, HIST1H2AJ:2919, HIST2H2AC:3581, HIST1H2BK:3894, HIST1H2AB:4054, HIST1H2BI:5036, HIST1H2BH:5124	0.984684
REACTOME_G_ALPHA1213_SIGNALLING_EVENTS	-0.0295728	0.407196	0.555	0.728847	66	FGD4:226, AKAP13:271, PLEKHG2:454, SOS2:495, FGD3:578, PREX1:722, GNG8:748, TBXA2R:1063, ARHGEF3:1189, ARHGEF6:1235	0.984684
KEGG_ASCORBATE_AND_ALDARATE_METABOLISM	-0.0679043	0.332645	0.56	0.669856	17	UGT2B4:1568, UGT2A3:3910, UGT2B10:4193, UGT2B28:4596, UGT2B7:4848, ALDH1B1:5861, UGT2B11:6034, ALDH7A1:7315, ALDH3A2:7407, UGT1A4:8201	0.984684
PID_LKB1_PATHWAY	-0.0324523	0.447097	0.563	0.760839	46	PRKAG1:368, SIK1:1026, STRADA:1099, CREB1:1287, SIK2:1607, EZR:2022, MARK2:2274, PRKAB1:2676, GSK3B:2734, YWHAH:3425	0.984684
REACTOME_E2F_ENABLED_INHIBITION_OF_PRE_REPLICATION_COMPLEX_FORMATION	-0.092496	0.31127	0.564	0.661743	10	ORC3:2258, ORC2:3482, ORC4:3699, CCNB1:4005, ORC5:4830, MCM8:5865, ORC1:8513, ORC6:11187, CDK1:16469, CDC25A:18932	0.984684
REACTOME_PROCESSIVE_SYNTHESIS_ON_THE_LAGGING_STRAND	-0.0524498	0.482056	0.565	0.780465	15	DNA2:301, LIG1:3112, POLD3:3757, POLA2:5046, POLD4:5706, PCNA:6024, RPA1:6219, RPA3:7330, PRIM1:11046, POLD1:11119	0.984684
PID_S1P_S1P4_PATHWAY	-0.0581405	0.485721	0.565	0.780819	12	GNA13:1398, S1PR5:2325, MAPK1:3180, GNAZ:4291, PLCG1:4343, S1PR4:4356, MAPK3:9019, GNAI2:11100, GNAO1:13096, GNAI3:14699	0.984684
BIOCARTA_CD40_PATHWAY	-0.0463825	0.534154	0.566	0.813101	15	RELA:510, TNFAIP3:877, TRAF6:1621, CD40LG:4132, IKBKB:4402, NFKBIA:4482, IKBKG:6598, CHUK:11128, IKBKAP:11298, MAP3K1:13012	0.984684
BIOCARTA_FIBRINOLYSIS_PATHWAY	-0.0754867	0.365402	0.569	0.701176	12	PLAT:2674, SERPINB2:3918, CPB2:4707, FGB:5247, F2R:7881, FGG:8769, FGA:8787, PLAU:10403, SERPINE1:11478, F2:11579	0.984684
PID_NFKAPPAB_CANONICAL_PATHWAY	-0.0437432	0.488016	0.57	0.78254	21	RELA:510, TNFAIP3:877, TRAF6:1621, BIRC2:2630, MALT1:3736, IKBKB:4402, NFKBIA:4482, ATM:5488, BCL10:6052, IKBKG:6598	0.984684
BIOCARTA_BCELLSURVIVAL_PATHWAY	-0.044423	0.538619	0.571	0.814706	16	BIRC5:4051, ZBTB7A:4788, DPF2:5462, CASP3:5602, JUND:5604, AKT1:7002, ITGB1:7091, MTOR:7687, XIAP:7998, PIK3R1:8339	0.984684
REACTOME_PURINE_RIBONUCLEOSIDE_MONOPHOSPHATE_BIOSYNTHESIS	-0.0525999	0.545921	0.576	0.816411	11	PAICS:4780, ADSS:5907, ADSSL1:5967, ADSL:6269, PFAS:8068, IMPDH2:9028, ATIC:9287, IMPDH1:9784, GMPS:12202, PPAT:12256	0.984684
REACTOME_METABOLISM_OF_NUCLEOTIDES	-0.0344303	0.330951	0.577	0.669856	67	DCTD:848, NME4:1498, DGUOK:1980, XDH:2567, HPRT1:2726, AK2:2790, CDA:2966, UPB1:3165, TYMP:3490, DPYS:3511	0.984684
REACTOME_SYNTHESIS_AND_INTERCONVERSION_OF_NUCLEOTIDE_DI_AND_TRIPHOSPHATES	-0.0468195	0.516936	0.583	0.802167	16	NME4:1498, AK2:2790, AK1:3606, CMPK1:4714, TXN:4799, RRM1:4998, GSR:7067, DTYMK:7594, TXNRD1:7605, RRM2B:7755	0.984684
KEGG_SYSTEMIC_LUPUS_ERYTHEMATOSUS	-0.0273129	0.3447	0.585	0.68303	101	HIST1H2BF:382, HIST1H2BO:568, HLA-DPA1:697, HLA-DPB1:828, HLA-DMB:1282, HIST2H3D:1733, C1R:1763, TRIM21:2184, HIST3H2BB:2273, C1QA:2300	0.984684
KEGG_O_GLYCAN_BIOSYNTHESIS	-0.0414395	0.456493	0.588	0.768786	27	GALNTL6:261, GALNT6:829, GCNT3:1013, ST6GALNAC1:1871, GALNT5:2183, GCNT4:3155, GALNTL5:3694, GALNT11:4731, C1GALT1:5056, GALNT7:5871	0.984684
BIOCARTA_CACAM_PATHWAY	-0.0581589	0.52434	0.597	0.806385	10	CREB1:1287, CAMK4:1384, CAMK2G:2872, CAMKK1:4030, CAMK1:4736, CAMK1G:8868, CAMK2A:11432, CAMKK2:15112, CAMK2B:17457, CAMK2D:18254	0.984684
PID_NFAT_TFPATHWAY	-0.0259102	0.539528	0.597	0.815032	47	MAF:118, EGR1:1237, IRF4:1734, NFATC3:1880, DGKA:2181, NFATC2:2520, FOSL1:2991, PTPN1:3130, JUNB:3907, CD40LG:4132	0.984684
BIOCARTA_DEATH_PATHWAY	-0.0423852	0.407161	0.598	0.728847	32	RELA:510, CASP10:695, DFFA:1040, APAF1:1565, FADD:2585, BIRC2:2630, BID:4207, NFKBIA:4482, TRADD:4730, CASP3:5602	0.984684
KEGG_VIRAL_MYOCARDITIS	-0.0275642	0.433002	0.601	0.751871	68	ABL1:660, HLA-DPA1:697, HLA-DPB1:828, HLA-DMB:1282, SGCG:1388, ICAM1:1644, HLA-F:1852, PRF1:1966, ACTB:2032, CCND1:2245	0.984684
REACTOME_REGULATION_OF_HYPOXIA_INDUCIBLE_FACTOR_HIF_BY_OXYGEN	-0.0427615	0.553914	0.602	0.818599	16	EPO:168, CA9:3264, EGLN3:4201, EP300:5771, HIF1A:5969, EPAS1:6629, TCEB2:6978, CREBBP:8594, EGLN1:9072, HIF3A:9702	0.984684
KEGG_ONE_CARBON_POOL_BY_FOLATE	-0.0515228	0.462289	0.603	0.768786	17	MTHFD2:1200, ALDH1L1:1342, MTHFD1L:1703, SHMT2:2430, FTCD:3874, MTHFD1:6984, MTHFS:7439, MTHFD2L:8162, ATIC:9287, TYMS:9379	0.984684
REACTOME_CHROMOSOME_MAINTENANCE	-0.0317319	0.277032	0.605	0.629344	99	CASC5:121, DNA2:301, HJURP:370, HIST1H2BF:382, REC8:400, POLE2:508, HIST1H2BO:568, ACD:641, CENPO:1021, STAG3:1077	0.984684
ST_FAS_SIGNALING_PATHWAY	-0.0221765	0.543611	0.605	0.81604	63	PTPN13:196, EPHB2:337, CASP10:695, BFAR:986, DFFA:1040, NR0B2:1320, NFKBIB:1436, EZR:2022, NFAT5:2427, ROCK1:2501	0.984684
REACTOME_MEIOSIS	-0.0295758	0.353101	0.608	0.68895	83	TEX15:58, HIST1H2BF:382, REC8:400, MSH4:541, MLH3:542, HIST1H2BO:568, ACD:641, STAG3:1077, SPO11:1484, HIST2H3D:1733	0.984684
REACTOME_SYNTHESIS_OF_BILE_ACIDS_AND_BILE_SALTS_VIA_7ALPHA_HYDROXYCHOLESTEROL	-0.0655888	0.379345	0.61	0.711898	15	CYP7A1:1687, ABCB11:1829, CYP27A1:2128, SLC27A5:2270, AKR1C4:4130, CYP8B1:4602, ACOX2:6889, AMACR:9823, ACOT8:10355, HSD3B7:10911	0.984684
REACTOME_TELOMERE_MAINTENANCE	-0.0286841	0.446997	0.612	0.760839	59	DNA2:301, HIST1H2BF:382, POLE2:508, HIST1H2BO:568, ACD:641, HIST3H2BB:2273, HIST1H2AJ:2919, LIG1:3112, HIST2H2AC:3581, POLD3:3757	0.984684
PID_ANTHRAX_PATHWAY	-0.0387592	0.580275	0.613	0.835318	17	MAP2K6:1427, CASP1:3067, MAPK1:3180, NLRP1:3499, VCAM1:4373, MAP2K3:4437, MAP2K7:5220, MAPK3:9019, IL1B:9068, MAP2K2:9648	0.984684
PID_NFAT_3PATHWAY	-0.0274843	0.502142	0.614	0.791632	50	CSNK2A1:727, CAMK4:1384, CABIN1:1483, PPP3CB:1823, NFATC3:1880, NFATC2:2520, BAD:2560, GSK3B:2734, PRKCH:3063, PRKCD:3384	0.984684
BIOCARTA_MTA3_PATHWAY	-0.0408991	0.537362	0.614	0.814706	19	TUBA4A:781, HSPB2:1505, SNAI2:2238, SNAI1:2387, CTSD:3667, HSPB1:5776, PDZK1:6478, TUBA1A:8510, GAPDH:8737, TUBA1C:9171	0.984684
PID_IL3_PATHWAY	-0.0372624	0.527781	0.615	0.81041	24	CEBPB:184, CNKSR1:265, GRB2:274, CSF2RB:686, ID1:2296, SRP9:2839, INPP5D:3960, OSM:6783, JAK2:8256, PIK3R1:8339	0.984684
REACTOME_INCRETIN_SYNTHESIS_SECRETION_AND_INACTIVATION	-0.038528	0.551104	0.615	0.818599	20	FFAR1:1283, GPR119:1553, SEC11C:2397, GNG13:4301, GRP:5482, SPCS2:5754, PCSK1:5927, SPCS1:6434, SEC11A:8255, DPP4:8296	0.984684
REACTOME_INTEGRIN_ALPHAIIB_BETA3_SIGNALING	-0.0315599	0.577843	0.617	0.834581	26	GRB2:274, VWF:663, BCAR1:2805, PTPN1:3130, SYK:3698, FGB:5247, RAPGEF3:5306, PDPK1:5447, ITGA2B:6459, RAP1B:6631	0.984684
REACTOME_SIGNALING_BY_FGFR_MUTANTS	-0.0264429	0.54914	0.619	0.818599	43	HRAS:232, CNTRL:234, GRB2:274, FGF22:1049, BCR:1065, FGFR1OP2:1379, MYO18A:1821, ZMYM2:1905, FGFR3:2845, FGF3:3215	0.984684
KEGG_APOPTOSIS	-0.0199336	0.533868	0.62	0.813101	82	IRAK2:333, RELA:510, CSF2RB:686, CASP10:695, DFFA:1040, APAF1:1565, PPP3CB:1823, IL1R1:2112, BAD:2560, FADD:2585	0.984684
BIOCARTA_ATRBRCA_PATHWAY	-0.0517984	0.411551	0.624	0.731519	21	FANCG:80, RAD17:194, FANCC:320, NBN:2340, FANCD2:2474, BRCA2:2526, RAD9A:3755, ATM:5488, ATR:5720, FANCE:6140	0.984684
BIOCARTA_TFF_PATHWAY	-0.0348695	0.589541	0.624	0.836512	20	HRAS:232, GRB2:274, APAF1:1565, BAD:2560, MAPK1:3180, CASP9:5854, AKT1:7002, ITGB1:7091, PIK3R1:8339, CYCS:8363	0.984684
REACTOME_P75_NTR_RECEPTOR_MEDIATED_SIGNALLING	-0.0239986	0.470711	0.625	0.773225	76	FGD4:226, PSENEN:237, AKAP13:271, PLEKHG2:454, SOS2:495, RELA:510, FGD3:578, PREX1:722, ARHGEF3:1189, ARHGEF6:1235	0.984684
KEGG_VEGF_SIGNALING_PATHWAY	-0.0174335	0.609949	0.626	0.846092	72	HRAS:232, PPP3CB:1823, NFATC3:1880, NFAT5:2427, NFATC2:2520, BAD:2560, PLA2G1B:2588, MAPKAPK2:2613, MAPK1:3180, RAC2:3186	0.984684
REACTOME_MITOCHONDRIAL_FATTY_ACID_BETA_OXIDATION	-0.0770886	0.31815	0.631	0.66546	14	ACADS:1337, MUT:4376, ACADVL:5037, ECI1:5289, ACADM:5339, HADHB:5495, ACADL:7712, DECR1:9620, PCCB:10690, PCCA:10746	0.984684
REACTOME_FORMATION_OF_ATP_BY_CHEMIOSMOTIC_COUPLING	-0.0690833	0.427705	0.632	0.750834	11	ATP5C1:290, ATP5J:1469, ATP5A1:3313, ATP5L:3641, ATP5D:7968, ATP5H:8665, ATP5B:9385, ATP5F1:11194, ATP5G1:11441, ATP5I:15851	0.984684
PID_HEDGEHOG_2PATHWAY	-0.0240229	0.696702	0.632	0.891032	22	STIL:593, ARRB2:1762, SMO:2003, LRP2:3128, ADRBK1:3290, LRPAP1:6943, AKT1:7002, PTHLH:7391, PTCH2:7530, HHAT:8035	0.984684
BIOCARTA_MTOR_PATHWAY	-0.0385482	0.541127	0.633	0.815519	21	EIF4A2:36, MKNK1:860, EIF4G3:3909, RPS6:4088, PDPK1:5447, TSC1:6931, AKT1:7002, TSC2:7049, EIF4G2:7087, MTOR:7687	0.984684
REACTOME_SIGNALING_BY_FGFR1_FUSION_MUTANTS	-0.0391156	0.565825	0.634	0.827338	18	CNTRL:234, GRB2:274, BCR:1065, FGFR1OP2:1379, MYO18A:1821, ZMYM2:1905, PLCG1:4343, CPSF6:5906, PIK3R1:8339, GAB2:11069	0.984684
REACTOME_SYNTHESIS_OF_PIPS_AT_THE_PLASMA_MEMBRANE	-0.0260605	0.621642	0.634	0.853907	30	MTM1:264, INPP4B:387, PIK3C2G:2210, PI4K2A:2522, MTMR1:3260, INPP5K:3939, PIP5K1C:4886, SYNJ2:5385, SYNJ1:6454, MTMR14:7595	0.984684
REACTOME_GLYCOPROTEIN_HORMONES	-0.0744153	0.372246	0.643	0.704414	12	INHBC:446, CGB:1125, CGB8:2797, CGA:3563, INHBE:5424, LHB:7167, CGB5:7686, INHBA:7801, INHA:13273, TSHB:14053	0.984684
KEGG_NUCLEOTIDE_EXCISION_REPAIR	-0.0264254	0.554059	0.645	0.818599	42	ERCC1:112, POLE2:508, RPA4:679, ERCC6:856, ERCC4:1081, LIG1:3112, POLD3:3757, RFC1:4276, ERCC2:4993, POLE3:5438	0.984684
REACTOME_SYNTHESIS_OF_PC	-0.0364607	0.592486	0.646	0.836681	18	SLC44A2:425, LPIN3:1369, SLC44A5:1593, SLC44A1:2656, CHKB:4264, SLC44A4:5245, CHAT:5387, PEMT:6511, PCYT1B:6721, ACHE:8952	0.984684
PID_TCR_CALCIUM_PATHWAY	-0.0274325	0.622056	0.647	0.853907	27	CABIN1:1483, PPP3CB:1823, NFATC3:1880, NFATC2:2520, FOSL1:2991, JUNB:3907, CD40LG:4132, IL4:4940, IFNG:6308, NFATC1:7569	0.984684
KEGG_CYTOKINE_CYTOKINE_RECEPTOR_INTERACTION	-0.0227669	0.216896	0.648	0.575027	253	TNFRSF17:7, TNFRSF11A:101, EPO:168, IL12A:207, IL2RB:213, INHBC:446, CXCL11:552, IL21R:669, CSF2RB:686, EGF:751	0.984684
REACTOME_NFKB_AND_MAP_KINASES_ACTIVATION_MEDIATED_BY_TLR4_SIGNALING_REPERTOIRE	-0.0230065	0.519055	0.649	0.80309	66	TLR4:310, IRAK2:333, RELA:510, TICAM1:658, TAB1:936, CREB1:1287, MAP2K6:1427, NFKBIB:1436, TRAF6:1621, TLR3:2085	0.984684
REACTOME_REGULATION_OF_SIGNALING_BY_CBL	-0.032594	0.632311	0.649	0.854811	18	GRB2:274, CRKL:680, VAV1:1450, SYK:3698, LYN:3927, BLNK:4362, RAPGEF1:4624, PIK3R1:8339, PIK3R3:9116, PIK3CB:10358	0.984684
REACTOME_CONVERSION_FROM_APC_C_CDC20_TO_APC_C_CDH1_IN_LATE_ANAPHASE	-0.0494692	0.507299	0.65	0.797451	15	ANAPC7:452, ANAPC10:1079, ANAPC11:2097, ANAPC5:2643, CDC26:3558, CDC16:5003, ANAPC4:6021, ANAPC2:7800, UBE2E1:7936, ANAPC1:13369	0.984684
REACTOME_CYTOSOLIC_SULFONATION_OF_SMALL_MOLECULES	-0.0572828	0.458215	0.652	0.768786	14	SULT1E1:839, SULT1B1:1364, SULT1C4:3323, SULT2B1:5155, SULT1A3:6998, SULT2A1:7120, SULT1C2:8060, SULT1A4:8268, SULT4A1:8632, SULT1A1:8956	0.984684
REACTOME_CIRCADIAN_CLOCK	-0.0242974	0.560978	0.653	0.825006	48	TGS1:756, DBP:878, NCOA6:976, CREB1:1287, NCOA3:1429, NCOA1:1976, NCOR1:2642, CUL1:3192, ARNTL2:3543, CLOCK:4792	0.984684
PID_P75_NTR_PATHWAY	-0.020854	0.553052	0.656	0.818599	68	PSENEN:237, MMP7:1052, APAF1:1565, TRAF6:1621, PRDM4:2431, BAD:2560, BIRC2:2630, IRAK1:3247, RHOC:3400, MYD88:3497	0.984684
PID_ERA_GENOMIC_PATHWAY	-0.0201072	0.590911	0.656	0.836512	60	CEBPB:184, AXIN2:973, NR0B2:1320, NCOA3:1429, ATP5J:1469, NRIP1:1968, NCOA1:1976, CCND1:2245, PDIA2:2410, NCOR1:2642	0.984684
PID_ILK_PATHWAY	-0.0250182	0.566448	0.659	0.827338	44	NACA:15, PPP1R14C:823, ARHGEF6:1235, CREB1:1287, PPP1R14A:1819, DIAPH1:1850, CCND1:2245, SNAI1:2387, GSK3B:2734, PPP1R14B:3102	0.984684
PID_IL12_2PATHWAY	-0.0261359	0.477616	0.66	0.778563	62	IL12A:207, IL2RB:213, RELA:510, CD3G:902, CD8A:1266, MAP2K6:1427, CD3D:1583, PPP3CB:1823, CD3E:1922, IL1R1:2112	0.984684
PID_IFNG_PATHWAY	-0.0261639	0.572328	0.66	0.832122	39	CEBPB:184, CRKL:680, CAMK2G:2872, CASP1:3067, MAPK1:3180, PRKCD:3384, PTGES2:4531, RAPGEF1:4624, IFNGR1:4924, EP300:5771	0.984684
BIOCARTA_CELL2CELL_PATHWAY	-0.0404491	0.613715	0.66	0.84884	13	CTNNA1:1128, BCAR1:2805, PXN:4354, ACTN3:5600, VCL:6248, CTNNA3:7616, CSK:9534, SRC:11629, ACTN2:11645, CTNNA2:12164	0.984684
KEGG_AMINOACYL_TRNA_BIOSYNTHESIS	-0.0302076	0.503933	0.661	0.793136	41	CARS2:1230, PSTK:1739, AARS2:2102, GARS:2143, TARS2:2732, DARS:2812, PARS2:3408, FARS2:3547, DARS2:3972, RARS2:4266	0.984684
KEGG_FRUCTOSE_AND_MANNOSE_METABOLISM	-0.0283277	0.573747	0.663	0.833237	33	FUK:861, MTMR2:1177, PHPT1:1239, MTMR7:2197, GMDS:3071, MTMR1:3260, SORD:3269, PFKP:4928, KHK:5375, PFKM:6350	0.984684
KEGG_PANTOTHENATE_AND_COA_BIOSYNTHESIS	-0.0402426	0.577502	0.666	0.834581	16	VNN2:152, ENPP3:2010, VNN1:3038, UPB1:3165, DPYS:3511, ENPP1:4459, PANK2:6425, PPCDC:8284, DPYD:10835, BCAT2:12215	0.984684
PID_ARF6_DOWNSTREAM_PATHWAY	-0.0497123	0.5863	0.666	0.836216	10	PLAUR:1718, PLD2:2346, MAPK1:3180, RAB11FIP3:4697, PIP5K1A:6041, MAPK3:9019, TIAM1:11600, RAC1:13378, KALRN:16880, PLD1:18393	0.984684
KEGG_ARACHIDONIC_ACID_METABOLISM	-0.0247292	0.522943	0.672	0.805606	56	CYP2B6:711, CYP4A11:1319, HPGDS:2021, TBXAS1:2170, CYP4A22:2449, GGT5:2555, PLA2G1B:2588, EPHX2:3263, PLA2G12B:3389, PLA2G2D:3467	0.984684
BIOCARTA_STATHMIN_PATHWAY	-0.0293333	0.666753	0.673	0.87756	18	CD3G:902, CAMK4:1384, CD3D:1583, CD3E:1922, CD2:2105, CAMK2G:2872, CCNB1:4005, PRKAR2B:7487, CD247:8527, MAPK13:9998	0.984684
REACTOME_AMINE_COMPOUND_SLC_TRANSPORTERS	-0.0365464	0.511369	0.675	0.799608	27	SLC44A2:425, RHAG:432, SLC6A14:969, SLC6A6:1132, SLC44A5:1593, SLC14A2:1907, SLC44A1:2656, RHCG:2981, SLC18A1:4091, SLC44A4:5245	0.984684
REACTOME_PYRIMIDINE_METABOLISM	-0.0365748	0.544027	0.675	0.81604	23	DCTD:848, CDA:2966, UPB1:3165, TYMP:3490, DPYS:3511, DUT:4225, UPP2:4233, NT5E:4996, DHODH:5330, UCK1:5432	0.984684
REACTOME_COSTIMULATION_BY_THE_CD28_FAMILY	-0.0192327	0.607155	0.678	0.844662	60	GRB2:274, GRAP2:275, HLA-DPA1:697, HLA-DPB1:828, CD3G:902, VAV1:1450, CD3D:1583, CD3E:1922, HLA-DQA2:2994, CD80:3397	0.984684
PID_IL23_PATHWAY	-0.0298685	0.530067	0.679	0.81226	37	RELA:510, IL24:890, CD3E:1922, MPO:2287, IL23A:2319, NOS2:2944, IL12B:3004, SOCS3:3050, TYK2:3163, CXCL9:4230	0.984684
REACTOME_DNA_STRAND_ELONGATION	-0.0312758	0.553655	0.681	0.818599	30	DNA2:301, GINS4:1630, MCM7:2958, LIG1:3112, POLD3:3757, MCM4:4141, CDC45:4739, POLA2:5046, POLD4:5706, MCM8:5865	0.984684
REACTOME_TIGHT_JUNCTION_INTERACTIONS	-0.0243453	0.650317	0.681	0.864422	29	PARD6B:709, CLDN17:1657, CLDN16:1948, CLDN6:2372, CLDN18:2823, CLDN22:3298, PRKCI:4029, CLDN12:4461, CLDN19:4665, CLDN14:6236	0.984684
REACTOME_LAGGING_STRAND_SYNTHESIS	-0.033056	0.618115	0.684	0.853079	19	DNA2:301, LIG1:3112, POLD3:3757, POLA2:5046, POLD4:5706, PCNA:6024, RPA1:6219, RPA3:7330, RFC4:7697, RFC3:8122	0.984684
BIOCARTA_EPO_PATHWAY	-0.0318111	0.631405	0.687	0.854811	19	EPO:168, HRAS:232, GRB2:274, CSNK2A1:727, EPOR:1321, PLCG1:4343, RAF1:6547, JAK2:8256, MAPK3:9019, SHC1:9460	0.984684
PID_EPHRINB_REV_PATHWAY	-0.0258232	0.624819	0.689	0.854811	30	PTPN13:196, EPHB2:337, RGS3:1952, MAP3K7:3578, LYN:3927, CXCR4:4149, LCK:4174, BLK:4782, FGB:5247, ITGA2B:6459	0.984684
REACTOME_EARLY_PHASE_OF_HIV_LIFE_CYCLE	-0.0376703	0.638285	0.69	0.85681	13	HMGA1:691, XRCC5:3006, LIG1:3112, XRCC6:3120, CXCR4:4149, LIG4:6730, XRCC4:7310, CD4:10889, BANF1:11994, PSIP1:14544	0.984684
KEGG_LINOLEIC_ACID_METABOLISM	-0.0332401	0.565413	0.692	0.827338	25	PLA2G1B:2588, PLA2G12B:3389, PLA2G2D:3467, PLA2G10:3938, PLA2G5:4126, CYP2C8:5858, CYP2C9:6333, JMJD7-PLA2G4B:7175, PLA2G4E:7630, CYP3A4:8192	0.984684
REACTOME_INTEGRIN_CELL_SURFACE_INTERACTIONS	-0.023132	0.484057	0.694	0.780465	77	ICAM3:102, ICAM2:140, GRB2:274, ITGB7:402, COL4A4:478, VWF:663, COL4A3:880, ITGA10:1173, ITGAE:1424, ICAM1:1644	0.984684
PID_P38_MKK3_6PATHWAY	-0.0221061	0.696665	0.696	0.891032	26	TAOK1:644, TAOK3:721, TAB1:936, MAP2K6:1427, TRAF6:1621, MAP3K7:3578, GADD45A:4184, MAP2K3:4437, TXN:4799, ATM:5488	0.984684
KEGG_GLYCOSAMINOGLYCAN_BIOSYNTHESIS_KERATAN_SULFATE	-0.0551445	0.459836	0.699	0.768786	15	ST3GAL3:2146, B3GNT2:2331, B3GNT7:4157, B4GALT4:5106, CHST4:5485, CHST2:6560, B3GNT1:6844, CHST6:7158, FUT8:7899, B4GALT3:8762	0.984684
REACTOME_TRNA_AMINOACYLATION	-0.0268585	0.547584	0.699	0.817537	42	CARS2:1230, AARS2:2102, GARS:2143, TARS2:2732, DARS:2812, PARS2:3408, FARS2:3547, PPA2:3704, DARS2:3972, RARS2:4266	0.984684
NABA_ECM_AFFILIATED	-0.0157451	0.491917	0.7	0.78478	162	CLEC4F:20, LGALS4:85, FCN3:141, CLEC11A:144, CLEC4A:380, CD209:862, PLXNC1:900, LMAN1:1711, GPC6:1755, CLEC18B:1887	0.984684
PID_SYNDECAN_3_PATHWAY	-0.0278118	0.691519	0.702	0.89026	17	PSENEN:237, NCAN:790, POMC:2222, SDC3:2285, PTN:3255, CTTN:3588, AGRP:7932, NCSTN:8521, PSEN1:9086, SRC:11629	0.984684
BIOCARTA_WNT_PATHWAY	-0.0235467	0.683867	0.706	0.886391	25	CSNK2A1:727, TAB1:936, FRAT1:2141, CCND1:2245, GSK3B:2734, MAP3K7:3578, APC:4508, WIF1:5512, CSNK1D:5588, FZD1:5877	0.984684
PID_ECADHERIN_NASCENT_AJ_PATHWAY	-0.024857	0.621576	0.708	0.853907	33	ITGB7:402, CSNK2A1:727, CTNNA1:1128, KLHL20:1381, ITGAE:1424, CCND1:2245, DLG1:2673, VAV2:2748, CTTN:3588, RAPGEF1:4624	0.984684
PID_TCR_JNK_PATHWAY	-0.0322369	0.676346	0.709	0.882792	14	GRAP2:275, CRKL:680, MAP3K7:3578, MAP4K1:6302, MAP3K8:7261, LAT:7447, LCP2:8216, JUN:10857, DBNL:11076, MAP2K4:12221	0.984684
PID_TNF_PATHWAY	-0.0172745	0.68894	0.709	0.889574	45	RELA:510, TNFAIP3:877, TAB1:936, MAP4K2:1271, TRAF1:1996, FADD:2585, BIRC2:2630, BAG4:2996, MAP3K7:3578, PRKCI:4029	0.984684
REACTOME_ACTIVATED_AMPK_STIMULATES_FATTY_ACID_OXIDATION_IN_MUSCLE	-0.0350447	0.606936	0.71	0.844662	18	PRKAG1:368, STRADA:1099, PRKAB1:2676, CPT2:3643, ACACB:4045, SLC25A20:4873, CPT1A:5389, CAB39:6614, ACSL1:8764, PRKAB2:9539	0.984684
PID_CMYB_PATHWAY	-0.0150191	0.639259	0.71	0.85681	82	MAF:118, CEBPB:184, HRAS:232, ZFHX3:484, TAB1:936, CD34:1057, LECT2:1508, PIAS3:1695, MYB:2120, CCND1:2245	0.984684
BIOCARTA_TH1TH2_PATHWAY	-0.046459	0.483517	0.712	0.780465	19	IL12A:207, IL12B:3004, CD40LG:4132, IFNGR1:4924, IL4:4940, CD86:5722, IFNG:6308, HLA-DRB1:6983, IL4R:7154, IFNGR2:7669	0.984684
KEGG_NICOTINATE_AND_NICOTINAMIDE_METABOLISM	-0.0287477	0.648576	0.714	0.864317	21	CD38:153, ENPP3:2010, NMNAT3:2777, PNP:3914, BST1:4397, ENPP1:4459, NT5E:4996, NMNAT1:5715, NAMPT:6463, NUDT12:7142	0.984684
BIOCARTA_ECM_PATHWAY	-0.0241167	0.689106	0.714	0.889574	23	HRAS:232, MYLK:777, DIAPH1:1850, ROCK1:2501, MAPK1:3180, PXN:4354, RAF1:6547, ITGB1:7091, PIK3R1:8339, GSN:8992	0.984684
REACTOME_PEPTIDE_CHAIN_ELONGATION	-0.0217886	0.591057	0.715	0.836512	51	RPL28:584, RPS9:1314, RPLP1:1521, RPLP2:2640, RPL9:2796, RPL13:2971, RPS20:2976, RPL3:3064, RPL3L:3410, RPS6:4088	0.984684
REACTOME_AMINE_LIGAND_BINDING_RECEPTORS	-0.0223532	0.638415	0.715	0.85681	37	DRD3:945, TAAR8:1223, HTR2B:1390, HTR6:2368, ADRA1D:2762, TAAR1:3151, CHRM5:3274, HTR4:3348, ADRB2:4753, HTR2A:5030	0.984684
KEGG_TASTE_TRANSDUCTION	-0.0229753	0.582488	0.716	0.836216	48	TAS2R5:514, TAS2R39:666, ADCY6:872, TAS2R38:911, ADCY4:968, TAS2R13:1794, TAS1R1:2226, TAS2R43:2248, SCNN1G:2306, TAS2R7:2751	0.984684
BIOCARTA_P35ALZHEIMERS_PATHWAY	-0.0359163	0.694188	0.717	0.890603	10	GSK3B:2734, APP:4513, CSNK1D:5588, MAPT:6353, CAPN1:6514, CDK5R1:9716, CDK5:12390, CSNK1A1:12813, CAPNS1:14689, CAPNS2:14818	0.984684
REACTOME_THROMBIN_SIGNALLING_THROUGH_PROTEINASE_ACTIVATED_RECEPTORS_PARS	-0.021249	0.702589	0.72	0.893271	27	GNG8:748, GNA13:1398, ARRB2:1762, F2RL3:2199, MAPK1:3180, ARRB1:3761, GNB1:3794, GNG11:3859, GNG13:4301, GNB4:5360	0.984684
REACTOME_SPHINGOLIPID_METABOLISM	-0.0231811	0.512752	0.722	0.799608	67	VAPB:243, ARSK:628, DEGS2:731, STS:939, GLA:1121, GLB1:1208, HEXB:1214, ASAH2:1988, SGPP1:2043, DEGS1:2938	0.984684
REACTOME_INHIBITION_OF_THE_PROTEOLYTIC_ACTIVITY_OF_APC_C_REQUIRED_FOR_THE_ONSET_OF_ANAPHASE_BY_MITOTIC_SPINDLE_CHECKPOINT_COMPONENTS	-0.0379881	0.587831	0.723	0.836216	17	ANAPC7:452, ANAPC10:1079, ANAPC11:2097, ANAPC5:2643, CDC26:3558, CDC16:5003, ANAPC4:6021, ANAPC2:7800, UBE2E1:7936, MAD2L1:8863	0.984684
REACTOME_HYALURONAN_METABOLISM	-0.0287376	0.709788	0.725	0.893271	14	HMMR:1147, HEXB:1214, SLC9A1:4893, HYAL1:5081, HAS3:7307, HEXA:7846, CD44:8062, LYVE1:8171, HAS2:11283, GUSB:11640	0.984684
PID_RHOA_PATHWAY	-0.0204232	0.643597	0.726	0.861274	43	CIT:992, LIMK2:1359, MAP2K6:1427, DIAPH1:1850, EZR:2022, PLD2:2346, ROCK1:2501, CFL1:4026, MAP2K3:4437, PIP5K1C:4886	0.984684
REACTOME_BOTULINUM_NEUROTOXICITY	-0.0270198	0.708398	0.727	0.893271	16	STX4:358, VAMP2:764, STX11:809, STX10:908, VAMP1:951, STX6:6797, STX3:8578, STX1A:8886, STX12:8984, SYT2:12068	0.984684
PID_EPO_PATHWAY	-0.0208803	0.678399	0.733	0.883786	33	EPO:168, HRAS:232, GRB2:274, CRKL:680, EPOR:1321, VAV2:2748, SOCS3:3050, PLCG2:3316, LYN:3927, INPP5D:3960	0.984684
KEGG_ETHER_LIPID_METABOLISM	-0.0218946	0.668522	0.734	0.878079	32	PLD2:2346, PAFAH2:2550, PLA2G1B:2588, PLA2G12B:3389, PLA2G2D:3467, PLA2G10:3938, PLA2G5:4126, PAFAH1B1:5135, PPAP2C:5246, PAFAH1B3:5620	0.984684
BIOCARTA_NTHI_PATHWAY	-0.0204169	0.729375	0.735	0.902172	24	RELA:510, MAP2K6:1427, MYD88:3497, MAP3K7:3578, IKBKB:4402, MAP2K3:4437, NFKBIA:4482, EP300:5771, TGFBR2:6286, TLR2:6775	0.984684
REACTOME_REGULATION_OF_IFNG_SIGNALING	-0.0244353	0.760415	0.735	0.909857	13	SOCS3:3050, PTPN1:3130, SUMO1:4080, IFNGR1:4924, IFNG:6308, PTPN2:6798, IFNGR2:7669, JAK2:8256, SOCS1:11762, JAK1:12103	0.984684
BIOCARTA_EXTRINSIC_PATHWAY	-0.0435483	0.586818	0.741	0.836216	13	PROS1:5168, FGB:5247, F5:6403, F7:6988, F2R:7881, PROC:8436, FGG:8769, FGA:8787, F3:9101, SERPINC1:9222	0.984684
KEGG_TYPE_I_DIABETES_MELLITUS	-0.02466	0.585356	0.744	0.836216	41	IL12A:207, HLA-DPA1:697, HLA-DPB1:828, HLA-DMB:1282, HLA-F:1852, PRF1:1966, HLA-DQA2:2994, IL12B:3004, CD80:3397, CD86:5722	0.984684
PID_ARF6_TRAFFICKING_PATHWAY	-0.0186105	0.666286	0.751	0.87756	45	EXOC1:604, ITGA7:857, CTNNA1:1128, ACAP1:1136, ITGA10:1173, EXOC2:1962, PLD2:2346, ITGA6:2677, EXOC5:4361, ADRB2:4753	0.984684
PID_CXCR4_PATHWAY	-0.014015	0.632866	0.752	0.854811	98	MMP9:182, ITGA7:857, CD3G:902, ITGA10:1173, GNA13:1398, VAV1:1450, CD3D:1583, PLCB3:1684, ARRB2:1762, CD3E:1922	0.984684
BIOCARTA_VEGF_PATHWAY	-0.0165013	0.766837	0.754	0.911312	27	HRAS:232, EIF2B1:588, EIF2B3:2116, EIF2B5:2559, ELAVL1:2811, EIF2S1:3997, PLCG1:4343, PXN:4354, HIF1A:5969, NOS3:8166	0.984684
REACTOME_ANDROGEN_BIOSYNTHESIS	-0.041278	0.65136	0.759	0.864422	10	HSD17B3:1712, POMC:2222, CGA:3563, CYP17A1:6477, LHB:7167, HSD3B2:9183, HSD3B1:13918, SRD5A1:14078, SRD5A2:14716, SRD5A3:15912	0.984684
BIOCARTA_CDK5_PATHWAY	-0.0417372	0.631817	0.76	0.854811	11	HRAS:232, EGR1:1237, MAPK1:3180, RAF1:6547, MAPK3:9019, MAP2K2:9648, CDK5R1:9716, CDK5:12390, MAP2K1:14328, NGF:15045	0.984684
KEGG_SPHINGOLIPID_METABOLISM	-0.0210168	0.650152	0.76	0.864422	39	DEGS2:731, GLA:1121, GLB1:1208, ASAH2:1988, SGPP1:2043, DEGS1:2938, NEU3:3032, ACER1:3140, SMPD4:3184, ACER3:4773	0.984684
PID_GMCSF_PATHWAY	-0.0172609	0.720382	0.771	0.898499	36	HRAS:232, GRB2:274, CSF2RB:686, MAPK1:3180, SYK:3698, NRAS:3716, LYN:3927, INPP5D:3960, IKBKB:4402, CSF2RA:4994	0.984684
REACTOME_TRIF_MEDIATED_TLR3_SIGNALING	-0.0140299	0.687699	0.772	0.889554	69	IRAK2:333, RELA:510, TICAM1:658, TAB1:936, CREB1:1287, RIPK3:1391, MAP2K6:1427, NFKBIB:1436, TRAF6:1621, TLR3:2085	0.984684
REACTOME_A_TETRASACCHARIDE_LINKER_SEQUENCE_IS_REQUIRED_FOR_GAG_SYNTHESIS	-0.0195732	0.735002	0.772	0.902172	25	NCAN:790, GPC6:1755, SDC2:2159, SDC3:2285, B3GAT2:4190, GPC4:4339, VCAN:4694, AGRN:5303, GPC2:6017, GXYLT1:7534	0.984684
PID_FRA_PATHWAY	-0.0145923	0.759023	0.772	0.909857	37	MMP9:182, PLAUR:1718, NFATC3:1880, CCND1:2245, NFATC2:2520, FOSL1:2991, ITGB4:3109, JUNB:3907, BGLAP:5472, JUND:5604	0.984684
BIOCARTA_LECTIN_PATHWAY	-0.0502627	0.563905	0.774	0.826458	11	C5:3534, MBL2:4433, MASP2:4439, C4B:5014, C2:9237, C7:9299, MASP1:10254, C6:10374, C9:11077, C3:12719	0.984684
REACTOME_PLATELET_ADHESION_TO_EXPOSED_COLLAGEN	-0.0231502	0.790408	0.774	0.919146	11	GP1BA:123, VWF:663, LYN:3927, GP9:4879, ITGB1:7091, FCER1G:9206, ITGA2:10755, FYN:14542, COL1A2:15844, GP5:16187	0.984684
REACTOME_GPCR_DOWNSTREAM_SIGNALING	-0.0122052	0.263901	0.775	0.622269	771	OR6A2:124, OR4Q3:151, OR1J2:191, OR1L6:205, FGD4:226, BDKRB1:256, AKAP13:271, OR52N5:285, OR2AG1:286, OR2Y1:347	0.984684
BIOCARTA_BARRESTIN_SRC_PATHWAY	-0.0192308	0.796596	0.775	0.921762	15	HRAS:232, MAPK1:3180, ARRB1:3761, GNB1:3794, RAF1:6547, DNM1:8458, MAPK3:9019, MAP2K2:9648, ADCY1:10205, HCK:11341	0.984684
KEGG_CHEMOKINE_SIGNALING_PATHWAY	-0.0107929	0.621782	0.776	0.853907	178	HRAS:232, GRB2:274, SOS2:495, RELA:510, CXCL11:552, CRKL:680, PREX1:722, GNG8:748, ADCY6:872, ADCY4:968	0.984684
PID_AURORA_B_PATHWAY	-0.022815	0.626944	0.776	0.854811	38	SMC2:90, TACC1:97, STMN1:395, MYLK:777, BUB1:950, NCAPH:1126, PEBP1:1197, SMC4:1977, KLHL13:2046, SGOL1:3182	0.984684
KEGG_GLYCINE_SERINE_AND_THREONINE_METABOLISM	-0.0266917	0.60739	0.777	0.844662	31	PHGDH:332, ALAS2:821, GLYCTK:927, SHMT2:2430, SRR:3627, PIPOX:4234, BHMT:4906, AOC3:5195, DAO:5249, GAMT:6754	0.984684
REACTOME_THE_ROLE_OF_NEF_IN_HIV1_REPLICATION_AND_DISEASE_PATHOGENESIS	-0.022145	0.719366	0.778	0.898499	22	ATP6V1H:1588, AP1M2:1599, ELMO1:3187, CD8B:3434, LCK:4174, AP2A1:5895, AP1G1:7802, AP2B1:8023, HLA-A:8278, CD247:8527	0.984684
BIOCARTA_CASPASE_PATHWAY	-0.0215579	0.720627	0.782	0.898499	23	CASP10:695, DFFA:1040, APAF1:1565, PRF1:1966, BIRC2:2630, CASP1:3067, LMNB2:5427, CASP3:5602, CASP9:5854, XIAP:7998	0.984684
PID_IL5_PATHWAY	-0.026087	0.735502	0.784	0.902172	14	GRB2:274, SDCBP:635, CSF2RB:686, LYN:3927, IL5RA:7562, JAK2:8256, PIK3R1:8339, PIM1:10174, PTPN11:11110, PIK3CA:12701	0.984684
KEGG_PRION_DISEASES	-0.0157441	0.750991	0.785	0.90801	34	HSPA5:645, EGR1:1237, C1QA:2300, C1QB:2589, MAPK1:3180, C5:3534, C1QC:3623, PRKX:4456, HSPA1A:4468, SOD1:5104	0.984684
REACTOME_SYNTHESIS_SECRETION_AND_DEACYLATION_OF_GHRELIN	-0.0244073	0.751953	0.788	0.908314	14	SEC11C:2397, MBOAT4:3676, SPCS2:5754, PCSK1:5927, SPCS1:6434, GHRL:7767, SEC11A:8255, BCHE:8686, SPCS3:9597, KLF4:9858	0.984684
REACTOME_GLUTATHIONE_CONJUGATION	-0.0224695	0.70934	0.789	0.893271	23	CNDP2:1694, GGT5:2555, GSS:2678, MGST3:3025, GSTA1:3321, GSTP1:3806, MGST2:4136, GSTA2:4228, GCLC:6016, GGCT:6905	0.984684
REACTOME_SHC_RELATED_EVENTS	-0.0244013	0.735542	0.789	0.902172	16	HRAS:232, GRB2:274, MAPK1:3180, NRAS:3716, KRAS:6164, RAF1:6547, SHC2:7951, MAPK3:9019, SHC1:9460, MAP2K2:9648	0.984684
REACTOME_SEMA4D_INDUCED_CELL_MIGRATION_AND_GROWTH_CONE_COLLAPSE	-0.0170443	0.787002	0.789	0.916853	21	LIMK2:1359, ROCK1:2501, RAC2:3186, RHOC:3400, RHOB:3964, MYH11:4191, MYH9:5250, RND1:6357, MYH14:8760, PLXNB1:9039	0.984684
PID_ALPHA_SYNUCLEIN_PATHWAY	-0.0169148	0.736946	0.794	0.902172	33	CSNK2A1:727, STUB1:1318, PLD2:2346, BAD:2560, MAPK1:3180, PRKCD:3384, SYK:3698, SNCAIP:3882, LYN:3927, LCK:4174	0.984684
REACTOME_SEROTONIN_RECEPTORS	-0.0250704	0.763715	0.799	0.909857	12	HTR2B:1390, HTR6:2368, HTR4:3348, HTR2A:5030, HTR1B:7672, HTR7:8274, HTR1F:8918, HTR1E:9677, HTR1D:12627, HTR1A:15422	0.984684
REACTOME_SHC1_EVENTS_IN_ERBB4_SIGNALING	-0.0182804	0.777303	0.804	0.914112	20	HRAS:232, GRB2:274, MAPK1:3180, NRAS:3716, NRG2:4579, HBEGF:4985, KRAS:6164, RAF1:6547, NRG4:8270, MAPK3:9019	0.984684
BIOCARTA_CYTOKINE_PATHWAY	-0.018883	0.764669	0.805	0.909913	21	IL12A:207, IL10:2930, IL12B:3004, IFNB1:4058, IL4:4940, IL15:6303, IFNG:6308, IFNA1:7301, IL9:7362, IL13:8608	0.984684
PID_AR_PATHWAY	-0.00979595	0.793421	0.805	0.920761	60	PRKDC:572, HIP1:845, NCOA6:976, CTDSP2:1131, PIAS3:1695, NRIP1:1968, CCND1:2245, SNURF:2836, XRCC5:3006, NKX3-1:3048	0.984684
BIOCARTA_SPRY_PATHWAY	-0.0227777	0.738098	0.807	0.902172	18	HRAS:232, GRB2:274, EGF:751, PTPRB:782, MAPK1:3180, SPRY3:3386, SPRY1:4905, RAF1:6547, MAPK3:9019, SHC1:9460	0.984684
REACTOME_SIGNAL_REGULATORY_PROTEIN_SIRP_FAMILY_INTERACTIONS	-0.0213767	0.797707	0.807	0.921762	12	GRB2:274, TYROBP:3864, CD47:4552, SIRPA:4982, SKAP2:5649, SIRPB1:7276, SIRPG:8106, SRC:11629, FYB:12660, PTK2:15124	0.984684
REACTOME_PHASE_II_CONJUGATION	-0.0192885	0.600216	0.81	0.838335	62	SULT1E1:839, SULT1B1:1364, UGT2B4:1568, CNDP2:1694, GLYAT:1769, TPMT:2348, COMT:2492, GGT5:2555, GSS:2678, ACSM1:2785	0.984684
REACTOME_LATENT_INFECTION_OF_HOMO_SAPIENS_WITH_MYCOBACTERIUM_TUBERCULOSIS	-0.0147275	0.776795	0.81	0.914112	31	SLC11A1:76, ATP6V0D1:268, LTF:314, CYBB:960, ATP6V1H:1588, NOS2:2944, ATP6V0A4:3314, NCF2:4611, TCIRG1:5392, CYBA:5551	0.984684
PID_AURORA_A_PATHWAY	-0.0149693	0.780447	0.81	0.915102	29	TACC1:97, GSK3B:2734, CPEB1:3585, AURKB:3834, BIRC5:4051, GADD45A:4184, NFKBIA:4482, GIT1:5035, DLGAP5:5143, CKAP5:6139	0.984684
REACTOME_UNWINDING_OF_DNA	-0.0280585	0.747353	0.812	0.906642	11	GINS4:1630, MCM7:2958, MCM4:4141, CDC45:4739, MCM8:5865, MCM3:7821, GINS2:9142, MCM2:12622, MCM5:15956, GINS1:17316	0.984684
PID_HIV_NEF_PATHWAY	-0.0155697	0.750195	0.812	0.907907	35	RELA:510, DFFA:1040, APAF1:1565, TRAF1:1996, FADD:2585, BAG4:2996, BID:4207, NFKBIA:4482, TRADD:4730, MAP2K7:5220	0.984684
PID_LYSOPHOSPHOLIPID_PATHWAY	-0.0133125	0.713277	0.817	0.89401	64	MMP9:182, HRAS:232, RELA:510, ADCY6:872, ADCY4:968, GNA13:1398, ARHGEF1:1671, PLCB3:1684, ADCY9:1845, PLD2:2346	0.984684
BIOCARTA_CARM_ER_PATHWAY	-0.0168671	0.73388	0.818	0.902172	34	SPEN:67, GTF2A1:1828, NRIP1:1968, CCND1:2245, HDAC11:2442, HDAC6:3023, PELP1:3446, HDAC7:5576, HDAC10:5689, EP300:5771	0.984684
BIOCARTA_PLATELETAPP_PATHWAY	-0.0241011	0.754965	0.819	0.909778	14	COL4A4:478, COL4A3:880, PLAT:2674, COL4A5:3942, APP:4513, COL4A6:8968, PLAU:10403, F9:10429, SERPINE1:11478, F2:11579	0.984684
BIOCARTA_INTEGRIN_PATHWAY	-0.0145728	0.762496	0.82	0.909857	36	HRAS:232, GRB2:274, CRKL:680, BCR:1065, ROCK1:2501, BCAR1:2805, MAPK1:3180, PXN:4354, RAPGEF1:4624, ACTN3:5600	0.984684
REACTOME_EXTENSION_OF_TELOMERES	-0.0186094	0.738081	0.822	0.902172	27	DNA2:301, POLE2:508, LIG1:3112, POLD3:3757, TERT:4626, POLA2:5046, POLD4:5706, PCNA:6024, RPA1:6219, WRAP53:6861	0.984684
REACTOME_APOPTOTIC_CLEAVAGE_OF_CELL_ADHESION_PROTEINS	-0.0307436	0.712403	0.825	0.89401	12	OCLN:2995, DSG1:4860, DSP:5451, CASP3:5602, LOC647859:5873, DSG2:6264, DSG3:6619, CDH1:10069, CTNNB1:12604, TJP1:13453	0.984684
REACTOME_EXTRINSIC_PATHWAY_FOR_APOPTOSIS	-0.0243693	0.761042	0.829	0.909857	13	CASP10:695, FADD:2585, TRADD:4730, TNFRSF10B:5651, FAS:6301, RIPK1:8104, TNFSF10:8269, FASLG:8832, TNF:11922, CASP8:14190	0.984684
PID_RXR_VDR_PATHWAY	-0.0181858	0.748441	0.83	0.906642	26	RARG:638, NCOA1:1976, THRB:3176, NR1H3:3775, FAM120B:4000, TGFB1:4116, NR1H2:4300, RXRB:5164, PPARG:6503, MED1:7420	0.984684
PID_MAPK_TRK_PATHWAY	-0.0141694	0.778418	0.83	0.914355	33	HRAS:232, EGR1:1237, CREB1:1287, MAP2K6:1427, TRPV1:2090, MAPKAPK2:2613, MAPK1:3180, PRKCD:3384, NRAS:3716, MAP2K3:4437	0.984684
KEGG_PATHOGENIC_ESCHERICHIA_COLI_INFECTION	-0.00893099	0.827366	0.831	0.940112	50	TLR4:310, ABL1:660, TUBA4A:781, EZR:2022, ACTB:2032, ROCK1:2501, OCLN:2995, CTTN:3588, ARPC3:3803, WAS:4034	0.984684
REACTOME_TRANSCRIPTIONAL_REGULATION_OF_WHITE_ADIPOCYTE_DIFFERENTIATION	-0.0101413	0.768217	0.832	0.911312	71	ADIPOQ:132, CEBPB:184, LPL:336, RELA:510, TGS1:756, NCOA6:976, CCNC:1165, MED13L:1406, NCOA3:1429, MED15:1862	0.984684
REACTOME_RNA_POL_I_PROMOTER_OPENING	-0.0118694	0.810922	0.833	0.930303	34	HIST1H2BF:382, HIST1H2BO:568, HIST2H3D:1733, HIST3H2BB:2273, HIST1H2AJ:2919, HIST2H2AC:3581, HIST1H2BK:3894, HIST1H2AB:4054, HIST1H2BI:5036, HIST1H2BH:5124	0.984684
PID_PI3KCI_AKT_PATHWAY	-0.0174701	0.724746	0.835	0.900997	34	PRKDC:572, BAD:2560, GSK3B:2734, YWHAH:3425, MLST8:4584, GSK3A:4854, YWHAQ:5342, PDPK1:5447, TBC1D4:5455, CASP9:5854	0.984684
REACTOME_REGULATION_OF_RHEB_GTPASE_ACTIVITY_BY_AMPK	-0.0222426	0.807624	0.836	0.929022	10	PRKAG1:368, RHEB:1038, PRKAB1:2676, TSC1:6931, TSC2:7049, PRKAB2:9539, PRKAA2:11460, PRKAG3:16407, PRKAA1:18298, PRKAG2:18481	0.984684
NABA_MATRISOME	-0.0063808	0.513676	0.839	0.799608	994	MMP8:19, CLEC4F:20, IMPG1:34, MEGF9:49, TMPRSS15:57, LGALS4:85, ADIPOQ:132, FCN3:141, CLEC11A:144, CST8:164	0.984684
REACTOME_CLASS_A1_RHODOPSIN_LIKE_RECEPTORS	-0.00724714	0.675108	0.84	0.882529	289	CCRL1:115, BDKRB1:256, GALR2:521, CXCL11:552, HCAR3:613, SSTR2:653, P2RY4:844, RXFP2:851, ADORA2A:914, DRD3:945	0.984684
REACTOME_SIGNALING_BY_THE_B_CELL_RECEPTOR_BCR	-0.00989702	0.718611	0.842	0.898499	112	PSMA1:136, HRAS:232, GRB2:274, RELA:510, CREB1:1287, NFKBIB:1436, VAV1:1450, CD79A:1457, RASGRP3:1726, PSME1:2013	0.984684
ST_JNK_MAPK_PATHWAY	-0.0107573	0.816425	0.843	0.934938	39	TAB1:936, TRAF6:1621, NFATC3:1880, IL1R1:2112, MAP3K7:3578, MAPK9:3695, MAP3K12:3729, NR2C2:3962, GADD45A:4184, GAB1:5133	0.984684
BIOCARTA_TGFB_PATHWAY	-0.0157443	0.812313	0.844	0.931064	19	ZFYVE9:166, TAB1:936, MAP3K7:3578, TGFB1:4116, APC:4508, EP300:5771, TGFBR2:6286, CREBBP:8594, MAPK3:9019, SMAD4:9265	0.984684
BIOCARTA_ACE2_PATHWAY	-0.0174551	0.827563	0.844	0.940112	13	COL4A4:478, COL4A3:880, ACE2:3428, COL4A5:3942, ACE:4846, REN:8574, COL4A6:8968, CMA1:9614, AGTR2:12699, AGTR1:14714	0.984684
REACTOME_GLUCURONIDATION	-0.0242743	0.780486	0.848	0.915102	11	UGT2B4:1568, UGT2B10:4193, UGT2B28:4596, UGT2B7:4848, UGT2B11:6034, UGT1A4:8201, UGT2B17:9553, UGDH:12659, UGT2A1:14501, UGP2:17348	0.984684
REACTOME_ADAPTIVE_IMMUNE_SYSTEM	-0.00543115	0.692425	0.851	0.89026	469	ICAM3:102, PSMA1:136, ICAM2:140, CTSL1:199, HRAS:232, GRB2:274, GRAP2:275, CD207:324, ITGB7:402, ANAPC7:452	0.984684
REACTOME_SRP_DEPENDENT_COTRANSLATIONAL_PROTEIN_TARGETING_TO_MEMBRANE	-0.0128435	0.705126	0.851	0.893271	73	RPL28:584, RPS9:1314, RPLP1:1521, SEC11C:2397, RPLP2:2640, RPL9:2796, SRP9:2839, RPL13:2971, RPS20:2976, RPL3:3064	0.984684
REACTOME_ENERGY_DEPENDENT_REGULATION_OF_MTOR_BY_LKB1_AMPK	-0.0134411	0.847926	0.853	0.954757	17	PRKAG1:368, RHEB:1038, STRADA:1099, PRKAB1:2676, PPM1A:5272, CAB39:6614, TSC1:6931, TSC2:7049, PRKAB2:9539, STK11:10411	0.984684
PID_ATR_PATHWAY	-0.0133696	0.775785	0.855	0.914112	38	TIMELESS:100, RAD17:194, CLSPN:849, NBN:2340, FANCD2:2474, BRCA2:2526, MCM7:2958, PLK1:3662, RAD9A:3755, FBXW11:4743	0.984684
REACTOME_TRAF6_MEDIATED_INDUCTION_OF_NFKB_AND_MAP_KINASES_UPON_TLR7_8_OR_9_ACTIVATION	-0.00947074	0.783145	0.861	0.916465	71	IRAK2:333, RELA:510, TAB1:936, CREB1:1287, MAP2K6:1427, NFKBIB:1436, TRAF6:1621, MAPKAPK2:2613, MAPK1:3180, IRAK1:3247	0.984684
PID_KIT_PATHWAY	-0.00840267	0.834279	0.865	0.946899	52	EPO:168, HRAS:232, GRB2:274, GRAP2:275, CRKL:680, EPOR:1321, VAV1:1450, SNAI2:2238, BAD:2560, SPRED2:2582	0.984684
KEGG_ABC_TRANSPORTERS	-0.0140247	0.747926	0.871	0.906642	44	ABCA4:148, ABCB1:625, ABCC10:1764, ABCB11:1829, ABCB6:2375, ABCA6:2450, ABCG2:3406, ABCG5:4073, ABCG8:4476, ABCA3:4485	0.984684
PID_IL4_2PATHWAY	-0.00641688	0.860496	0.871	0.957311	63	CEBPB:184, GRB2:274, AICDA:590, HMGA1:691, IRF4:1734, PARP14:1840, MYB:2120, FCER2:2610, TFF3:2733, IL10:2930	0.984684
REACTOME_CHEMOKINE_RECEPTORS_BIND_CHEMOKINES	-0.0111385	0.777496	0.874	0.914112	54	CCRL1:115, CXCL11:552, CXCL10:1441, CCL16:1857, PF4:2030, XCL1:2114, CCL27:3281, CXCR5:3783, CXCR4:4149, CXCL9:4230	0.984684
BIOCARTA_MYOSIN_PATHWAY	-0.00879298	0.865592	0.874	0.957311	31	ARHGEF5:646, MYLK:777, ARHGEF3:1189, ARHGEF6:1235, GNA13:1398, ARHGEF1:1671, ARHGEF19:2271, ROCK1:2501, GNB1:3794, PKN1:5739	0.984684
REACTOME_THROMBOXANE_SIGNALLING_THROUGH_TP_RECEPTOR	-0.0105992	0.876353	0.876	0.962436	18	GNG8:748, TBXA2R:1063, GNA13:1398, GNB1:3794, GNG11:3859, GNG13:4301, GNB4:5360, GNG4:6635, GNA11:7132, GNG7:12084	0.984684
REACTOME_ACTIVATION_OF_ATR_IN_RESPONSE_TO_REPLICATION_STRESS	-0.0125947	0.796757	0.877	0.921762	35	RAD17:194, ORC3:2258, MCM7:2958, ORC2:3482, ORC4:3699, RAD9A:3755, MCM4:4141, CDC45:4739, ORC5:4830, CDC25C:5669	0.984684
REACTOME_PPARA_ACTIVATES_GENE_EXPRESSION	-0.00522787	0.855782	0.879	0.956965	102	TGS1:756, NCOA6:976, CCNC:1165, SREBF2:1256, CYP4A11:1319, CYP1A1:1399, MED13L:1406, NCOA3:1429, GLIPR1:1633, CYP7A1:1687	0.984684
REACTOME_YAP1_AND_WWTR1_TAZ_STIMULATED_GENE_EXPRESSION	-0.0109335	0.856073	0.88	0.956965	23	TGS1:756, NCOA6:976, NCOA3:1429, NCOA1:1976, TEAD2:3758, WWTR1:6723, TBX5:7092, YAP1:7233, MED1:7420, SMARCD3:8230	0.984684
REACTOME_REVERSIBLE_HYDRATION_OF_CARBON_DIOXIDE	-0.0125403	0.880477	0.881	0.962436	12	CA4:2037, CA2:3014, CA9:3264, CA1:6977, CA3:7229, CA5A:7786, CA5B:9585, CA12:10037, CA6:11102, CA14:16745	0.984684
KEGG_LYSINE_DEGRADATION	-0.00876381	0.842623	0.89	0.951274	43	AADAT:598, AASDH:760, SUV420H2:775, PLOD2:815, GCDH:1447, SETD8:1669, SETDB2:2594, EHHADH:3447, PIPOX:4234, WHSC1L1:4594	0.984684
BIOCARTA_NDKDYNAMIN_PATHWAY	-0.0124587	0.88125	0.893	0.962436	12	EPS15:920, PPP3CB:1823, SYNJ2:5385, AMPH:5681, AP2A1:5895, SYNJ1:6454, DNM1:8458, PPP3CA:12539, EPN1:13790, PICALM:15936	0.984684
SIG_REGULATION_OF_THE_ACTIN_CYTOSKELETON_BY_RHO_GTPASES	-0.00872909	0.868701	0.9	0.957311	30	MYLK:777, ROCK1:2501, FLNA:2625, VASP:3179, PAK3:3417, MYLK2:3764, CFL1:4026, WASL:4530, FSCN1:4931, WASF1:4949	0.984684
REACTOME_KERATAN_SULFATE_KERATIN_METABOLISM	-0.00903996	0.86407	0.901	0.957311	30	OMD:408, GLB1:1208, HEXB:1214, ST3GAL3:2146, B3GNT2:2331, B3GNT7:4157, B4GALT4:5106, B3GNT3:6390, CHST2:6560, B4GALT5:6658	0.984684
KEGG_PARKINSONS_DISEASE	-0.00817169	0.770123	0.902	0.911312	108	ATP5G2:211, ATP5C1:290, LRRK2:346, COX5B:1076, ATP5J:1469, UQCRB:1516, APAF1:1565, UQCRC2:2077, VDAC3:2232, COX7A1:2327	0.984684
KEGG_REGULATION_OF_AUTOPHAGY	-0.00948992	0.857375	0.903	0.956965	30	PIK3R4:1577, IFNA8:2417, IFNA2:2718, IFNA4:2864, IFNA16:2934, IFNA21:2974, IFNA17:3496, ATG5:5235, ATG4C:5988, IFNG:6308	0.984684
KEGG_PORPHYRIN_AND_CHLOROPHYLL_METABOLISM	-0.00778222	0.877182	0.906	0.962436	33	CP:46, ALAS2:821, UGT2B4:1568, COX15:1661, UGT2A3:3910, ALAD:4155, UGT2B10:4193, UGT2B28:4596, UGT2B7:4848, UGT2B11:6034	0.984684
REACTOME_DESTABILIZATION_OF_MRNA_BY_BRF1	-0.0102988	0.883184	0.907	0.962436	17	EXOSC2:349, MAPKAPK2:2613, DCP2:2721, ZFP36L1:3820, AKT1:7002, EXOSC5:8435, DIS3:8511, EXOSC6:9731, DCP1A:10117, XRN1:10186	0.984684
PID_HNF3A_PATHWAY	-0.00623841	0.88891	0.908	0.962436	42	CEBPB:184, C4BPB:548, FOXA3:989, PISD:1007, NCOA3:1429, ATP5J:1469, NRIP1:1968, NKX3-1:3048, NFIC:3058, KLK3:4185	0.984684
PID_PLK1_PATHWAY	-0.0108294	0.808408	0.909	0.929088	42	CLSPN:849, BUB1:950, PLK1S1:1301, MLF1IP:1786, NINL:2586, CENPE:3117, ERCC6L:3137, SGOL1:3182, STAG2:3379, PLK1:3662	0.984684
REACTOME_APC_CDC20_MEDIATED_DEGRADATION_OF_NEK2A	-0.0119539	0.860702	0.909	0.957311	18	ANAPC7:452, ANAPC10:1079, ANAPC11:2097, ANAPC5:2643, CDC26:3558, CDC16:5003, ANAPC4:6021, ANAPC2:7800, UBE2E1:7936, MAD2L1:8863	0.984684
REACTOME_N_GLYCAN_ANTENNAE_ELONGATION	-0.0155105	0.840813	0.911	0.950937	14	ST8SIA3:1481, ST6GAL1:2670, B4GALT4:5106, ST8SIA6:5167, B4GALT5:6658, B4GALT3:8762, MGAT4C:10102, B4GALT1:10234, MGAT4B:12413, MGAT5:13133	0.984684
BIOCARTA_AKAP95_PATHWAY	-0.0133431	0.883867	0.911	0.962436	10	PRKAG1:368, DDX5:1965, CCNB1:4005, NCAPD2:6138, PRKAR2B:7487, AKAP8:11082, PPP1CA:13111, PRKACB:14575, CDK1:16469, PRKAR2A:18787	0.984684
REACTOME_SHC_MEDIATED_CASCADE	-0.0072559	0.894378	0.911	0.962944	28	HRAS:232, GRB2:274, FGF22:1049, FGFR3:2845, FGF3:3215, NRAS:3716, FGF4:4413, FGF19:4693, FGFR1:5603, KRAS:6164	0.984684
PID_RHODOPSIN_PATHWAY	-0.0150623	0.798549	0.914	0.921902	24	GUCA1C:3542, SLC24A1:3557, GNB1:3794, RDH5:3924, PDE6A:4713, CNGB1:5223, CNGA1:6200, RGS9:6461, RGS9BP:6748, PDE6G:6787	0.984684
PID_ARF6_PATHWAY	-0.00463511	0.926662	0.915	0.975166	33	EGF:751, ACAP1:1136, FBXO8:1331, ARRB2:1762, ARRB1:3761, PXN:4354, ADRB2:4753, GIT1:5035, CYTH3:5337, TSHR:5727	0.984684
REACTOME_PURINE_SALVAGE	-0.0150154	0.851362	0.917	0.956762	13	DGUOK:1980, HPRT1:2726, APRT:3784, PNP:3914, ADAL:5090, DCK:7963, GMPR2:10094, AMPD3:10721, ADK:13674, GMPR:14599	0.984684
REACTOME_TRANSPORT_TO_THE_GOLGI_AND_SUBSEQUENT_MODIFICATION	-0.00994353	0.843466	0.92	0.951274	33	MGAT2:200, MAN2A1:294, ST8SIA3:1481, LMAN1:1711, MGAT3:2422, ST6GAL1:2670, MAN1A2:3594, B4GALT4:5106, ST8SIA6:5167, B4GALT5:6658	0.984684
REACTOME_GRB2_EVENTS_IN_ERBB2_SIGNALING	-0.00586223	0.924223	0.921	0.975166	22	HRAS:232, GRB2:274, EGF:751, MAPK1:3180, NRAS:3716, NRG2:4579, HBEGF:4985, KRAS:6164, RAF1:6547, NRG4:8270	0.984684
PID_CIRCADIAN_PATHWAY	-0.00673689	0.928052	0.923	0.975166	15	TIMELESS:100, NONO:2233, CLOCK:4792, WDR5:4888, ATR:5720, PER2:5726, BHLHE40:5796, NR1D1:6501, PER1:11954, CRY2:12923	0.984684
PID_TCR_RAS_PATHWAY	-0.00635115	0.934452	0.923	0.975166	14	HRAS:232, MAPK1:3180, NRAS:3716, KRAS:6164, RAF1:6547, MAP3K8:7261, MAPK3:9019, FOS:10642, PRKCB:12549, ELK1:12823	0.984684
KEGG_NEUROTROPHIN_SIGNALING_PATHWAY	-0.00375545	0.887973	0.924	0.962436	119	NTRK2:197, HRAS:232, GRB2:274, IRAK2:333, SOS2:495, RELA:510, ABL1:660, CRKL:680, CAMK4:1384, NFKBIB:1436	0.984684
REACTOME_PURINE_METABOLISM	-0.00843869	0.86892	0.928	0.957311	32	DGUOK:1980, XDH:2567, HPRT1:2726, APRT:3784, PNP:3914, CAT:4639, PAICS:4780, NT5E:4996, ADAL:5090, ADSS:5907	0.984684
KEGG_SULFUR_METABOLISM	-0.00889241	0.911639	0.928	0.969722	13	SUOX:746, SULT1E1:839, CHST13:3053, SULT2B1:5155, SULT1A3:6998, SULT1A4:8268, SULT1A1:8956, PAPSS2:12293, CHST11:12558, SULT1A2:14021	0.984684
PID_P53_REGULATION_PATHWAY	-0.00460627	0.90697	0.929	0.968352	54	ABL1:660, TP53AIP1:1307, SETD8:1669, CSNK1G1:1785, FBXO11:2067, PPP2R4:2326, GSK3B:2734, CSNK1G3:2885, TTC5:2906, PRKCD:3384	0.984684
REACTOME_ABC_FAMILY_PROTEINS_MEDIATED_TRANSPORT	-0.00592626	0.907735	0.93	0.968352	32	ABCA4:148, ABCB1:625, ABCB6:2375, ABCA6:2450, ABCG5:4073, ABCG8:4476, ABCA3:4485, ABCA8:4540, CFTR:4915, ABCA10:5593	0.984684
BIOCARTA_CXCR4_PATHWAY	-0.00602902	0.91863	0.93	0.973474	24	HRAS:232, RELA:510, PIK3C2G:2210, BCAR1:2805, MAPK1:3180, GNB1:3794, CXCR4:4149, PLCG1:4343, PXN:4354, RAF1:6547	0.984684
KEGG_PROTEIN_EXPORT	-0.00736122	0.904929	0.931	0.967782	22	HSPA5:645, SEC11C:2397, SRP9:2839, OXA1L:5132, SPCS2:5754, SPCS1:6434, SRP54:6684, SRP68:7833, SRP19:8167, SEC11A:8255	0.984684
KEGG_SNARE_INTERACTIONS_IN_VESICULAR_TRANSPORT	-0.00424359	0.929875	0.933	0.975166	36	STX4:358, VAMP2:764, STX11:809, STX10:908, VAMP1:951, SNAP23:1273, VAMP5:1863, VAMP4:2870, TSNARE1:4302, STX19:4571	0.984684
REACTOME_MRNA_DECAY_BY_5_TO_3_EXORIBONUCLEASE	-0.00882605	0.923029	0.935	0.975166	10	DCP2:2721, DCP1B:3229, EDC3:7750, EDC4:8236, DCP1A:10117, XRN1:10186, DDX6:11853, LSM4:13008, LSM1:13375, PATL1:14907	0.984684
PID_P53_DOWNSTREAM_PATHWAY	-0.00327721	0.896687	0.936	0.964084	133	PRMT1:693, CASP10:695, APAF1:1565, ATF3:1635, NLRC4:1810, DDX5:1965, TP63:2065, SNAI2:2238, ARID3A:2313, PRKAB1:2676	0.984684
BIOCARTA_IL2_PATHWAY	-0.00590123	0.92372	0.936	0.975166	22	IL2RB:213, HRAS:232, GRB2:274, CSNK2A1:727, SYK:3698, LCK:4174, RAF1:6547, MAPK3:9019, IL2RA:9198, SHC1:9460	0.984684
KEGG_HISTIDINE_METABOLISM	-0.00687963	0.898068	0.938	0.96448	29	ACY3:56, LCMT2:906, METTL6:1336, ALDH3B1:1933, UROC1:2750, CNDP1:2880, FTCD:3874, ALDH1B1:5861, HEMK1:6362, ABP1:6823	0.984684
BIOCARTA_ETC_PATHWAY	-0.00756834	0.930759	0.939	0.975166	11	ATP5A1:3313, SDHD:3696, NDUFA1:5080, SLC25A6:5159, SLC25A4:7901, CYCS:8363, SDHB:12071, SDHC:12669, GPD2:12865, SDHA:15461	0.984684
REACTOME_DIABETES_PATHWAYS	-0.00313498	0.903729	0.943	0.967308	126	ATP6V0D1:268, EXOSC2:349, EXTL3:509, EXOC1:604, HSPA5:645, DDX11:671, VAMP2:764, CTDSP2:1131, FKBP14:1300, ATF3:1635	0.984684
BIOCARTA_ERK5_PATHWAY	-0.0079277	0.909947	0.944	0.969722	17	HRAS:232, GRB2:274, CREB1:1287, MAPK1:3180, PLCG1:4343, AKT1:7002, PIK3R1:8339, MAPK3:9019, SHC1:9460, PIK3CG:10814	0.984684
BIOCARTA_RNA_PATHWAY	-0.00745501	0.934956	0.944	0.975166	10	RELA:510, EIF2S1:3997, NFKBIA:4482, DNAJC3:5925, EIF2AK2:9442, CHUK:11128, NFKB1:14008, EIF2S2:14537, MAP3K14:15394, TP53:15743	0.984684
KEGG_TYROSINE_METABOLISM	-0.00640476	0.887318	0.946	0.962436	41	LCMT2:906, DCT:1162, METTL6:1336, ALDH3B1:1933, MIF:1973, COMT:2492, ADH4:4388, ADH1C:4668, TH:4671, AOC3:5195	0.984684
REACTOME_PHOSPHOLIPID_METABOLISM	-0.00228249	0.913572	0.947	0.969722	193	VAPB:243, MTM1:264, INPP4B:387, SLC44A2:425, PLA2G4C:485, ARSK:628, DEGS2:731, STS:939, GLA:1121, MTMR2:1177	0.984684
REACTOME_REGULATORY_RNA_PATHWAYS	-0.00598563	0.936057	0.948	0.975166	15	TNRC6B:529, DGCR8:3657, POLR2F:4299, XPO5:7298, POLR2E:7319, DROSHA:7539, TNRC6C:8000, TARBP2:8506, DICER1:8969, POLR2K:12043	0.984684
PID_FOXO_PATHWAY	-0.00357924	0.932458	0.954	0.975166	47	CSNK1G1:1785, SOD2:2862, CSNK1G3:2885, YWHAH:3425, PLK1:3662, MAPK9:3695, SGK1:3936, CCNB1:4005, GADD45A:4184, IKBKB:4402	0.986945
ST_GRANULE_CELL_SURVIVAL_PATHWAY	-0.002885	0.958655	0.954	0.984807	27	EPHB2:337, CREB1:1287, CREB3:2039, MAPK1:3180, MAPK9:3695, CREB5:4167, APC:4508, MAP2K7:5220, CASP3:5602, MAPK8IP2:6891	0.986945
REACTOME_REGULATED_PROTEOLYSIS_OF_P75NTR	-0.00554535	0.951594	0.96	0.984241	10	PSENEN:237, RELA:510, TRAF6:1621, NCSTN:8521, PSEN1:9086, APH1B:13298, APH1A:13946, ADAM17:15635, PSEN2:16136, NGFR:16195	0.990218
BIOCARTA_IL6_PATHWAY	-0.00287539	0.962789	0.961	0.985647	22	CEBPB:184, HRAS:232, GRB2:274, CSNK2A1:727, TYK2:3163, RAF1:6547, JAK2:8256, MAPK3:9019, IL6:9269, SHC1:9460	0.990218
PID_BMP_PATHWAY	-0.00327721	0.941504	0.963	0.977451	42	RGMB:649, TAB1:936, CTDSP2:1131, SMURF2:1183, AHSG:2532, GSK3B:2734, CTDSPL:2854, MAPK1:3180, MAP3K7:3578, PPP1R15A:4062	0.990302
REACTOME_ABACAVIR_TRANSPORT_AND_METABOLISM	-0.00523932	0.954262	0.967	0.984807	10	ABCB1:625, ABCG2:3406, ADAL:5090, PCK1:5277, SLC22A2:7726, SLC22A3:11115, GUK1:13794, NT5C2:14710, ADH1A:16418, SLC22A1:17459	0.990469
REACTOME_NEGATIVE_REGULATORS_OF_RIG_I_MDA5_SIGNALING	-0.00316651	0.958107	0.967	0.984807	23	TNFAIP3:877, TRIM25:2601, MAVS:2955, UBA7:4650, IFIH1:5125, ATG5:5235, NLRC5:5802, ISG15:6890, DDX58:6925, IRF3:7051	0.990469
REACTOME_ADVANCED_GLYCOSYLATION_ENDPRODUCT_RECEPTOR_SIGNALING	-0.00276004	0.972524	0.972	0.986222	13	MAPK1:3180, DDOST:4322, APP:4513, AGER:6491, MAPK3:9019, S100A12:9469, PRKCSH:9565, SAA1:9913, S100B:10057, CAPZA2:11560	0.992134
REACTOME_SOS_MEDIATED_SIGNALLING	-0.00248447	0.974334	0.973	0.986222	14	HRAS:232, GRB2:274, MAPK1:3180, NRAS:3716, KRAS:6164, RAF1:6547, MAPK3:9019, MAP2K2:9648, YWHAB:10829, MAP2K1:14328	0.992134
REACTOME_CDC6_ASSOCIATION_WITH_THE_ORC_ORIGIN_COMPLEX	-0.00382869	0.964939	0.977	0.985647	11	ORC3:2258, ORC2:3482, ORC4:3699, ORC5:4830, MCM8:5865, ORC1:8513, ORC6:11187, E2F2:14485, CDC6:15210, E2F1:17318	0.992134
KEGG_PEROXISOME	-0.00185929	0.955434	0.979	0.984807	76	GSTK1:616, HAO2:1055, PEX1:1150, ECI2:1191, PRDX5:1834, XDH:2567, NUDT19:2846, SOD2:2862, NOS2:2944, EPHX2:3263	0.992134
KEGG_RIBOSOME	-0.00131282	0.97343	0.98	0.986222	54	RPL28:584, RPS9:1314, RPLP1:1521, RPLP2:2640, RPL9:2796, RPL13:2971, RPS20:2976, RPL3:3064, RPL3L:3410, RPS6:4088	0.992134
KEGG_GLYCOSPHINGOLIPID_BIOSYNTHESIS_GLOBO_SERIES	-0.00253396	0.974773	0.981	0.986222	13	GLA:1121, HEXB:1214, B3GALT5:2951, ST8SIA1:4098, HEXA:7846, NAGA:7997, B3GALNT1:9109, FUT9:9923, FUT2:14546, ST3GAL1:15297	0.992134
REACTOME_SIGNALING_BY_GPCR	-0.00120721	0.907086	0.984	0.968352	872	CCRL1:115, OR6A2:124, OR4Q3:151, OR1J2:191, OR1L6:205, FGD4:226, HRAS:232, BDKRB1:256, AKAP13:271, GRB2:274	0.992134
REACTOME_SEMA4D_IN_SEMAPHORIN_SIGNALING	-0.00135391	0.980952	0.984	0.989469	26	CD72:1089, LIMK2:1359, ROCK1:2501, RAC2:3186, RHOC:3400, RHOB:3964, MYH11:4191, MYH9:5250, RND1:6357, MYH14:8760	0.992134
KEGG_FC_GAMMA_R_MEDIATED_PHAGOCYTOSIS	-0.000550266	0.985574	0.988	0.991782	91	CRKL:680, MARCKSL1:1233, LIMK2:1359, VAV1:1450, PLD2:2346, VAV2:2748, PLA2G4F:3142, VASP:3179, MAPK1:3180, RAC2:3186	0.993371
BIOCARTA_PITX2_PATHWAY	-0.00213947	0.977123	0.99	0.987165	15	GSK3B:2734, APC:4508, EP300:5771, FZD1:5877, AXIN1:6924, MED1:7420, LDB1:7651, CREBBP:8594, WNT1:11386, TRRAP:12042	0.993371
REACTOME_PKB_MEDIATED_EVENTS	-0.000657237	0.990405	0.991	0.994295	28	PRKAG1:368, RHEB:1038, STRADA:1099, PRKAB1:2676, RPS6:4088, MLST8:4584, PDE3B:4837, PPM1A:5272, CAB39:6614, TSC1:6931	0.993371
REACTOME_SMOOTH_MUSCLE_CONTRACTION	-0.00139095	0.984167	0.994	0.991147	17	MYLK:777, MYL6B:1579, TPM4:3220, SORBS3:3436, MYH11:4191, CALD1:4842, SORBS1:5477, TPM2:5716, VCL:6248, TLN1:12922	0.993672
REACTOME_ASPARAGINE_N_LINKED_GLYCOSYLATION	-0.000168776	0.995874	0.997	0.99795	79	MGAT2:200, MAN2A1:294, DOLPP1:714, ST8SIA3:1481, LMAN1:1711, CALR:1909, MGAT3:2422, ST6GAL1:2670, ALG14:2702, ALG10:2962	0.993672
REACTOME_GLUCAGON_SIGNALING_IN_METABOLIC_REGULATION	-0.000168102	0.99759	0.999	0.998371	27	GNG8:748, ADCY6:872, ADCY4:968, ADCY9:1845, GCGR:2863, GNB1:3794, GNG11:3859, GNG13:4301, GNB4:5360, GNG4:6635	0.993672
KEGG_PPAR_SIGNALING_PATHWAY	-2.68053e-05	0.999387	0.999	0.999387	69	ADIPOQ:132, LPL:336, CYP4A11:1319, CYP7A1:1687, CYP27A1:2128, SLC27A5:2270, CYP4A22:2449, FABP6:2574, FABP1:2590, DBI:2647	0.993672

## Sheet: ELL (PC2) Positive Correlations
	stat	pval	simpermPval	p.adj	# of genes	top ten genes and rank	qval
REACTOME_G0_AND_EARLY_G1	0.260373	2.39354e-05	0.002	0.00611789	22	CDC25A:9, RBL2:765, E2F5:904, CCNE1:1238, CCNA2:1358, CCNE2:1461, E2F1:1623, LIN9:1970, CDK1:2472, E2F4:2522	0.689211
REACTOME_HORMONE_SENSITIVE_LIPASE_HSL_MEDIATED_TRIACYLGLYCEROL_HYDROLYSIS	0.241254	0.00826563	0.003	0.103563	10	CAV1:650, PPP1CC:1222, ABHD5:1329, PLIN1:2563, PRKACA:3464, MGLL:3894, PRKACB:4366, PPP1CA:5830, FABP4:6616, LIPE:18052	0.689211
REACTOME_ASSOCIATION_OF_TRIC_CCT_WITH_TARGET_PROTEINS_DURING_BIOSYNTHESIS	0.225009	7.25117e-05	0.005	0.0115838	26	CCT5:101, FKBP9:419, KIFC3:482, CCT8:557, CCT3:699, AP3M1:730, USP11:990, CCT7:1059, TCP1:1173, FBXO4:1245	0.689211
REACTOME_VOLTAGE_GATED_POTASSIUM_CHANNELS	0.205927	3.08385e-06	0.006	0.00197058	43	KCND3:239, KCNH1:373, KCNA3:590, KCNA5:594, KCNH2:784, KCNG3:864, KCNA6:941, KCNB2:1007, KCNF1:1035, KCNA10:1041	0.689211
REACTOME_PROTEIN_FOLDING	0.150132	0.000213703	0.006	0.01448	51	CCT5:101, FKBP9:419, KIFC3:482, CCT8:557, CCT3:699, TUBA3C:720, AP3M1:730, TUBA3D:787, USP11:990, CCT7:1059	0.689211
REACTOME_REGULATION_OF_BETA_CELL_DEVELOPMENT	0.188322	0.000453767	0.008	0.0243128	29	GCK:42, RBPJ:838, HNF4G:908, NR5A2:1343, NEUROD1:1474, FOXA2:1488, AKT3:1976, FOXO1:2079, NKX6-1:2533, NKX2-2:2629	0.689211
PID_VEGF_VEGFR_PATHWAY	0.257192	0.00487014	0.011	0.0886865	10	PGF:304, VEGFC:1470, VEGFA:2680, FIGF:2696, NRP2:3286, FLT1:5378, KDR:5612, NRP1:7010, VEGFB:7512, FLT4:8602	0.689211
BIOCARTA_NO1_PATHWAY	0.151204	0.00766706	0.011	0.103053	26	PRKAR2A:154, RYR2:465, CHRM1:639, PDE3A:642, CAV1:650, TNNI1:1448, VEGFA:2680, PRKG2:3585, SLC7A1:3928, PRKAR1A:4276	0.689211
REACTOME_ERK_MAPK_TARGETS	0.228576	0.000405416	0.014	0.023551	20	PPP2R1B:399, PPP2R1A:678, MAPK14:729, RPS6KA2:858, PPP2R5D:1076, MAPK7:1284, DUSP6:1574, DUSP7:3041, RPS6KA1:3069, MEF2C:3738	0.689211
REACTOME_REGULATION_OF_INSULIN_SECRETION_BY_ACETYLCHOLINE	0.245097	0.0072943	0.014	0.103053	10	GNA14:486, PLCB1:629, PRKCA:969, MARCKS:1539, CHRM3:1642, PLCB2:2584, GNAQ:4201, GNA15:6037, GNA11:11809, PLCB3:17257	0.689211
REACTOME_POTASSIUM_CHANNELS	0.13145	1.26551e-05	0.016	0.0040433	93	GABBR1:217, KCND3:239, KCNH1:373, HCN3:477, ABCC9:570, KCNA3:590, KCNA5:594, KCNJ2:683, KCNH2:784, KCNG3:864	0.689211
BIOCARTA_AGR_PATHWAY	0.141745	0.00374941	0.016	0.0744402	35	RAPSN:247, LAMA3:422, CHRM1:639, EGFR:1072, ITGA1:1580, NRG3:1589, DVL1:1743, DMD:2121, PAK2:2318, LAMA2:2816	0.689211
PID_ANGIOPOIETIN_RECEPTOR_PATHWAY	0.10604	0.00961624	0.016	0.110717	50	ANGPT1:1, MMP2:153, ANGPT2:187, TNIP2:324, CRK:472, MAPK14:729, RASA1:1109, GRB14:1502, STAT5B:1867, FOXO1:2079	0.689211
KEGG_ALDOSTERONE_REGULATED_SODIUM_REABSORPTION	0.114716	0.0121761	0.016	0.124628	40	ATP1B1:468, IRS2:488, IRS1:504, PRKCA:969, INSR:1091, IGF1:1256, ATP1A2:1303, HSD11B2:2041, NEDD4L:2425, IRS4:3319	0.689211
REACTOME_CLASS_B_2_SECRETIN_FAMILY_RECEPTORS	0.10919	0.00065506	0.017	0.0298988	82	ADCYAP1:37, WNT7B:48, WNT6:82, ADCYAP1R1:366, PTH1R:372, SHH:581, VIPR1:584, FZD6:663, WNT5A:728, FZD7:742	0.689211
KEGG_MATURITY_ONSET_DIABETES_OF_THE_YOUNG	0.159299	0.0069494	0.017	0.103053	24	GCK:42, HNF4G:908, NR5A2:1343, NEUROD1:1474, FOXA2:1488, MNX1:2034, NKX6-1:2533, NKX2-2:2629, NEUROG3:3349, ONECUT1:3586	0.689211
BIOCARTA_SARS_PATHWAY	0.180634	0.0479946	0.02	0.286565	10	MAPK14:729, EIF4E:2496, LDHC:3911, CKM:4051, NCL:4680, FBL:5041, GPT:6909, LDHB:8290, LDHA:10458, ANPEP:12221	0.709011
REACTOME_GABA_RECEPTOR_ACTIVATION	0.146063	0.00054295	0.025	0.0266881	47	ADCY8:127, GABBR1:217, KCNJ2:683, GABRA5:1102, GABRB3:1123, GABRG3:1193, GABRG2:1213, GNAL:1425, KCNJ12:1597, GNGT1:1613	0.709011
REACTOME_FORMATION_OF_TUBULIN_FOLDING_INTERMEDIATES_BY_CCT_TRIC	0.159861	0.0112674	0.025	0.121006	21	CCT5:101, CCT8:557, CCT3:699, TUBA3C:720, TUBA3D:787, CCT7:1059, TCP1:1173, CCT6A:1712, TUBB6:1724, CCT2:4958	0.709011
REACTOME_DSCAM_INTERACTIONS	0.240451	0.0057706	0.026	0.095777	11	MAPK14:729, DSCAML1:2213, NTN1:3065, MAPK8:3876, PAK1:4604, MAPK12:5161, DCC:5482, RAC1:5563, MAPK11:6187, DSCAM:6573	0.709011
KEGG_BIOSYNTHESIS_OF_UNSATURATED_FATTY_ACIDS	0.203791	0.00123478	0.027	0.0415275	21	FADS2:750, YOD1:1092, ELOVL5:1312, ACOT4:1821, SCD:2257, HSD17B12:2577, TECR:2713, ACOX3:2731, ACOT7:2735, PTPLA:3192	0.709011
REACTOME_HOST_INTERACTIONS_OF_HIV_FACTORS	0.0693325	0.0144828	0.027	0.14129	105	PSMD3:23, NUP155:544, NUP93:575, PSMA8:599, NUP107:769, PSMF1:781, PSMB8:1016, SEH1L:1103, NUP205:1336, NUP133:1351	0.709011
BIOCARTA_ARF_PATHWAY	0.172334	0.0139438	0.028	0.137078	17	MYC:1061, E2F1:1623, CDKN2A:2077, POLR1C:2688, MDM2:2938, TWIST1:3134, TP53:3198, TBX2:5253, RAC1:5563, POLR1B:5604	0.709011
REACTOME_HIV_INFECTION	0.0735491	0.00111996	0.03	0.0397585	167	PSMD3:23, TAF4B:186, GTF2H4:351, NUP155:544, NUP93:575, PSMA8:599, VPS37C:627, NUP107:769, PSMF1:781, CCNT2:850	0.709011
REACTOME_VEGF_LIGAND_RECEPTOR_INTERACTIONS	0.246579	0.00694822	0.031	0.103053	10	VEGFC:1470, PDGFC:2180, VEGFA:2680, FIGF:2696, NRP2:3286, FLT1:5378, KDR:5612, NRP1:7010, VEGFB:7512, FLT4:8602	0.709011
REACTOME_NEURONAL_SYSTEM	0.102953	1.27331e-08	0.032	1.62729e-05	263	CACNB2:53, ADCY8:127, STX5:152, GABBR1:217, KCND3:239, CHRNA3:322, KCNH1:373, CACNG2:383, GRIK4:425, HCN3:477	0.709011
REACTOME_MEMBRANE_TRAFFICKING	0.0781055	0.00412462	0.035	0.0775186	114	SH3GL2:66, TPD52:104, SNX5:147, GJA1:626, VPS37C:627, CHMP4C:745, SNX2:753, GJA8:782, ARCN1:790, SNF8:832	0.709011
REACTOME_REGULATION_OF_GENE_EXPRESSION_IN_BETA_CELLS	0.164506	0.0131034	0.035	0.131859	19	GCK:42, HNF4G:908, NEUROD1:1474, FOXA2:1488, AKT3:1976, FOXO1:2079, NKX6-1:2533, NKX2-2:2629, PKLR:3626, IAPP:4646	0.709011
KEGG_FOCAL_ADHESION	0.070198	0.000818702	0.036	0.0326969	194	MYL9:32, COL4A1:49, ITGAV:57, COL4A2:123, LAMB1:171, PGF:304, THBS1:323, IGF1R:379, PDGFB:389, LAMA3:422	0.709011
REACTOME_ADHERENS_JUNCTIONS_INTERACTIONS	0.17922	0.00127998	0.036	0.041944	27	CDH8:157, CDH4:178, CDH6:179, PVRL1:510, JUP:917, PVRL3:957, CDH2:1115, PVRL4:1316, CDH11:1767, CDH9:2886	0.709011
REACTOME_PREFOLDIN_MEDIATED_TRANSFER_OF_SUBSTRATE_TO_CCT_TRIC	0.152996	0.00597395	0.036	0.0978808	27	CCT5:101, CCT8:557, CCT3:699, TUBA3C:720, TUBA3D:787, CCT7:1059, TCP1:1173, CCT6A:1712, TUBB6:1724, PFDN5:1729	0.709011
KEGG_CYSTEINE_AND_METHIONINE_METABOLISM	0.103858	0.0391644	0.04	0.256819	33	MAT2A:134, DNMT1:788, DNMT3L:816, ADI1:1036, AHCY:1326, AHCYL1:2130, IL4I1:2272, LDHAL6A:3222, LDHC:3911, MTR:4188	0.709011
PID_WNT_SIGNALING_PATHWAY	0.143567	0.00861523	0.041	0.105868	28	WNT7B:48, CTHRC1:316, KREMEN2:449, LRP6:545, ROR2:591, FZD6:663, WNT5A:728, FZD7:742, FZD5:1271, IGFBP4:1555	0.709011
PID_S1P_S1P3_PATHWAY	0.124704	0.0225005	0.041	0.186725	28	GNA12:22, ITGAV:57, PDGFB:389, GNA14:486, AKT3:1976, VEGFA:2680, GNAI1:2963, S1PR2:3784, GNAQ:4201, GNAI3:4242	0.709011
REACTOME_NUCLEAR_EVENTS_KINASE_AND_TRANSCRIPTION_FACTOR_ACTIVATION	0.179425	0.00291599	0.042	0.0631633	23	PPP2R1B:399, PPP2R1A:678, MAPK14:729, RPS6KA2:858, PPP2R5D:1076, MAPK7:1284, DUSP6:1574, ATF1:2381, DUSP7:3041, RPS6KA1:3069	0.709011
REACTOME_INWARDLY_RECTIFYING_K_CHANNELS	0.151086	0.00771463	0.045	0.103053	26	GABBR1:217, ABCC9:570, KCNJ2:683, KCNJ8:1121, KCNJ12:1597, GNGT1:1613, KCNJ11:3457, GNG12:3811, KCNJ6:3902, KCNJ3:4151	0.709011
BIOCARTA_AT1R_PATHWAY	0.138553	0.00988207	0.045	0.11143	29	PTK2B:814, PRKCA:969, EGFR:1072, MEF2D:1128, SOS1:2029, MEF2C:3738, AGT:3782, PTK2:3817, MAPK8:3876, GNAQ:4201	0.709011
PID_S1P_S1P2_PATHWAY	0.154066	0.0105949	0.045	0.116726	23	GNA12:22, GNA14:486, IRS1:504, MAPK14:729, GNAI1:2963, S1PR2:3784, MAPK8:3876, GNAQ:4201, GNAI3:4242, CDH5:4272	0.709011
REACTOME_G1_S_SPECIFIC_TRANSCRIPTION	0.144277	0.03955	0.045	0.257049	17	CDC25A:9, CCNE1:1238, E2F1:1623, CDK1:2472, DHFR:3483, TFDP1:3608, CDC6:3731, CCNA1:5261, POLA1:6937, RRM2:7255	0.709011
REACTOME_LATE_PHASE_OF_HIV_LIFE_CYCLE	0.116852	0.000188584	0.046	0.01448	86	TAF4B:186, GTF2H4:351, NUP155:544, NUP93:575, VPS37C:627, NUP107:769, CCNT2:850, SEH1L:1103, ERCC3:1104, TAF12:1283	0.709011
REACTOME_RNA_POL_II_TRANSCRIPTION_PRE_INITIATION_AND_PROMOTER_OPENING	0.13884	0.00513521	0.046	0.0886865	34	TAF4B:186, GTF2H4:351, ERCC3:1104, TAF12:1283, POLR2A:1995, CDK7:2009, POLR2G:2024, GTF2H1:2481, TAF5:2702, POLR2D:3372	0.709011
SA_REG_CASCADE_OF_CYCLIN_EXPR	0.259132	0.00188923	0.047	0.0493845	12	CCNE1:1238, CCNA2:1358, CCNE2:1461, E2F1:1623, CDKN2A:2077, E2F4:2522, CDK4:3434, E2F2:4456, CCNA1:5261, CDKN1B:6197	0.709011
REACTOME_LIGAND_GATED_ION_CHANNEL_TRANSPORT	0.189741	0.00262984	0.047	0.0606994	21	GLRB:237, GABRA5:1102, GABRB3:1123, GABRG3:1193, GABRG2:1213, GLRA1:1314, GABRR2:2263, GABRB1:2266, GABRA3:2863, GABRA6:3614	0.709011
PID_NECTIN_PATHWAY	0.110986	0.0422765	0.05	0.266154	28	ITGAV:57, PDGFB:389, CRK:472, PVRL1:510, PVRL3:957, CLDN1:2198, PTPRM:3174, PTK2:3817, IQGAP1:4042, PVRL2:5012	0.714636
REACTOME_CYCLIN_E_ASSOCIATED_EVENTS_DURING_G1_S_TRANSITION_	0.120254	0.00189346	0.051	0.0493845	56	CDC25A:9, PSMD3:23, PSMF1:781, PSMB8:1016, MYC:1061, CCNE1:1238, WEE1:1246, CCNA2:1358, PSMC1:1445, CCNE2:1461	0.714636
REACTOME_TRANSMISSION_ACROSS_CHEMICAL_SYNAPSES	0.100659	6.05528e-06	0.052	0.00257955	172	CACNB2:53, ADCY8:127, GABBR1:217, CHRNA3:322, CACNG2:383, GRIK4:425, SLC1A3:620, CACNA1B:624, PLCB1:629, GRIN2B:679	0.714636
REACTOME_GABA_A_RECEPTOR_ACTIVATION	0.24148	0.00378608	0.052	0.0744402	12	GABRA5:1102, GABRB3:1123, GABRG3:1193, GABRG2:1213, GABRB1:2266, GABRA3:2863, GABRA6:3614, GABRA2:3925, GABRB2:5797, GABRA1:6048	0.714636
REACTOME_G1_PHASE	0.201841	0.000132162	0.056	0.01448	30	E2F3:380, PPP2R1B:399, CCND2:459, PPP2R1A:678, RBL2:765, E2F5:904, E2F1:1623, CDK7:2009, CDKN2D:2011, CDKN2A:2077	0.714636
REACTOME_RNA_POL_I_TRANSCRIPTION_TERMINATION	0.153616	0.0174661	0.056	0.15944	20	GTF2H4:351, ERCC3:1104, CDK7:2009, PTRF:2327, GTF2H1:2481, POLR1C:2688, MNAT1:4823, GTF2H2:4885, GTF2H2B:5370, POLR1B:5604	0.714636
REACTOME_MRNA_CAPPING	0.161021	0.00636355	0.059	0.101906	24	GTF2H4:351, ERCC3:1104, POLR2A:1995, CDK7:2009, POLR2G:2024, GTF2H1:2481, NCBP1:2764, POLR2D:3372, RNGTT:4381, MNAT1:4823	0.714636
REACTOME_NGF_SIGNALLING_VIA_TRKA_FROM_THE_PLASMA_MEMBRANE	0.0984672	0.000163772	0.061	0.01448	124	ADCYAP1:37, SH3GL2:66, ADCY8:127, KIDINS220:149, PRKAR2A:154, RICTOR:365, ADCYAP1R1:366, PPP2R1B:399, CRK:472, IRS2:488	0.714636
REACTOME_FORMATION_OF_THE_HIV1_EARLY_ELONGATION_COMPLEX	0.15155	0.0119355	0.061	0.124628	23	GTF2H4:351, ERCC3:1104, POLR2A:1995, CDK7:2009, POLR2G:2024, GTF2H1:2481, NCBP1:2764, POLR2D:3372, MNAT1:4823, GTF2H2:4885	0.714636
PID_S1P_S1P1_PATHWAY	0.117324	0.0694859	0.061	0.337654	20	ITGAV:57, PDGFB:389, PLCB2:2584, VEGFA:2680, GNAI1:2963, GNAI3:4242, S1PR1:5132, RAC1:5563, KDR:5612, GNAO1:5845	0.714636
KEGG_PATHWAYS_IN_CANCER	0.0612741	0.000197831	0.062	0.01448	320	WNT7B:48, COL4A1:49, ITGAV:57, WNT6:82, COL4A2:123, MMP2:153, LAMB1:171, RET:265, PGF:304, IGF1R:379	0.714636
PID_AVB3_INTEGRIN_PATHWAY	0.0854461	0.0112596	0.062	0.121006	74	COL4A1:49, ITGAV:57, IGF1R:379, IRS1:504, COL5A1:717, COL5A2:770, PTK2B:814, SDC1:817, COL1A1:964, CBL:1164	0.714636
REACTOME_SIGNALING_BY_PDGF	0.0763881	0.00502546	0.063	0.0886865	114	COL4A1:49, COL4A2:123, ADCY8:127, PRKAR2A:154, THBS1:323, RICTOR:365, PDGFB:389, CRK:472, COL5A1:717, COL5A2:770	0.714636
KEGG_MTOR_SIGNALING_PATHWAY	0.0931638	0.0215955	0.064	0.182775	51	ULK2:240, PGF:304, RICTOR:365, RPTOR:492, PRKAA1:643, RPS6KA2:858, IGF1:1256, VEGFC:1470, AKT3:1976, ULK3:2002	0.714636
REACTOME_HIV_LIFE_CYCLE	0.0966722	0.00092762	0.065	0.0348676	99	TAF4B:186, GTF2H4:351, NUP155:544, NUP93:575, VPS37C:627, NUP107:769, CCNT2:850, SEH1L:1103, ERCC3:1104, CCR5:1157	0.714636
KEGG_SMALL_CELL_LUNG_CANCER	0.0821759	0.00944769	0.065	0.110717	84	COL4A1:49, ITGAV:57, COL4A2:123, LAMB1:171, E2F3:380, LAMA3:422, MYC:1061, CCNE1:1238, CCNE2:1461, E2F1:1623	0.714636
PID_IL2_1PATHWAY	0.0885994	0.0245903	0.07	0.201452	54	IRS2:488, IRS1:504, MAPK14:729, PTK2B:814, MYC:1061, PPP2R5D:1076, RASA1:1109, STAT3:1144, IKZF3:1408, CISH:1471	0.720744
KEGG_VALINE_LEUCINE_AND_ISOLEUCINE_BIOSYNTHESIS	0.200683	0.0212235	0.072	0.180824	11	VARS:30, PDHA1:1199, PDHA2:2212, VARS2:3067, BCAT1:4929, IARS2:5483, PDHB:5626, BCAT2:6726, IARS:8611, LARS2:9276	0.720744
REACTOME_PLATELET_SENSITIZATION_BY_LDL	0.157904	0.0408754	0.073	0.262376	14	PTPN6:204, PPP2R1B:399, PPP2R1A:678, MAPK14:729, PPP2R5D:1076, PLA2G4A:5027, PPP2R5C:5380, LRP8:7537, PPP2R5B:9149, PPP2CB:9241	0.720744
REACTOME_GLUCOSE_TRANSPORT	0.135494	0.00389622	0.074	0.075445	38	GCK:42, G6PC:172, NUP155:544, NUP93:575, SLC2A1:600, NUP107:769, SEH1L:1103, NUP205:1336, NUP133:1351, NUP35:1487	0.720744
REACTOME_ENDOSOMAL_SORTING_COMPLEX_REQUIRED_FOR_TRANSPORT_ESCRT	0.127754	0.0381872	0.078	0.254184	22	VPS37C:627, CHMP4C:745, SNF8:832, HGS:946, CHMP2B:3070, VPS25:3371, VPS36:3459, STAM:5268, CHMP6:5559, VPS37A:6271	0.720744
BIOCARTA_MPR_PATHWAY	0.100155	0.0538624	0.078	0.304585	31	PRKAR2A:154, MYT1:766, ARPC2:1110, GNGT1:1613, CDK1:2472, GNAI1:2963, RPS6KA1:3069, PAQR7:3084, CAP1:3906, ARPC1A:3967	0.720744
KEGG_NEUROACTIVE_LIGAND_RECEPTOR_INTERACTION	0.0536746	0.00275883	0.079	0.0618559	268	DRD5:214, GABBR1:217, GLRB:237, GRID1:251, FSHB:281, CHRNA3:322, ADCYAP1R1:366, PTH1R:372, NTSR2:402, GRIK4:425	0.720744
REACTOME_TRANSPORT_OF_MATURE_MRNA_DERIVED_FROM_AN_INTRONLESS_TRANSCRIPT	0.16241	0.00149243	0.083	0.0443564	32	CPSF3:107, NUP155:544, NUP93:575, NUP107:769, SEH1L:1103, NUP205:1336, NUP133:1351, NUP35:1487, CPSF1:2147, NUP37:2441	0.720744
REACTOME_CELL_CELL_COMMUNICATION	0.0757508	0.00465953	0.083	0.0863025	118	CDH8:157, CDH4:178, CDH6:179, PTPN6:204, KIRREL3:294, LAMA3:422, PVRL1:510, SPTBN1:685, MAPK14:729, PTK2B:814	0.720744
REACTOME_MRNA_PROCESSING	0.0967446	0.000168842	0.085	0.01448	128	CPSF3:107, GTF2H4:351, PAPOLA:522, FUS:535, NUP155:544, NUP93:575, NUP107:769, HNRNPK:860, SEH1L:1103, ERCC3:1104	0.720744
REACTOME_MITOTIC_G1_G1_S_PHASES	0.0924034	0.000474617	0.085	0.0243128	121	CDC25A:9, PSMD3:23, E2F3:380, PPP2R1B:399, CCND2:459, MCM6:625, PPP2R1A:678, PRIM2:743, RBL2:765, PSMF1:781	0.720744
BIOCARTA_CELLCYCLE_PATHWAY	0.204054	0.000711742	0.085	0.0313657	23	CDC25A:9, CCND2:459, CCNE1:1238, E2F1:1623, CDK7:2009, CDKN2D:2011, CDKN2A:2077, CDK1:2472, CDK4:3434, CDK6:3531	0.720744
KEGG_PANCREATIC_CANCER	0.0892922	0.0105166	0.085	0.116726	69	PGF:304, E2F3:380, PLD1:548, SMAD2:583, EGFR:1072, STAT3:1144, VEGFC:1470, E2F1:1623, TGFA:1755, AKT3:1976	0.720744
REACTOME_SIGNAL_ATTENUATION	0.185605	0.0260487	0.085	0.205877	12	CRK:472, IRS2:488, IRS1:504, INSR:1091, SOS1:2029, GRB10:3039, SHC3:4292, DOK1:8893, SHC1:9481, MAPK3:9922	0.720744
REACTOME_FORMATION_OF_RNA_POL_II_ELONGATION_COMPLEX_	0.13182	0.00993976	0.086	0.11143	32	GTF2H4:351, CCNT2:850, ERCC3:1104, TCEA1:1297, POLR2A:1995, CDK7:2009, POLR2G:2024, GTF2H1:2481, NCBP1:2764, POLR2D:3372	0.720744
REACTOME_METABOLISM_OF_CARBOHYDRATES	0.0496021	0.0106954	0.087	0.116826	227	NDST4:29, GCK:42, G6PC:172, HS3ST2:378, PGM1:397, PPP2R1B:399, NUP155:544, NUP93:575, PHKB:580, SLC2A1:600	0.720744
REACTOME_TRIGLYCERIDE_BIOSYNTHESIS	0.131566	0.00506649	0.088	0.0886865	38	DGAT1:785, ACACA:951, ELOVL5:1312, LPIN1:1768, AGPAT5:2245, HSD17B12:2577, GPAM:2647, TECR:2713, GPD1L:2874, ELOVL4:3073	0.720744
KEGG_MELANOMA	0.0912355	0.00846954	0.088	0.105088	70	IGF1R:379, E2F3:380, PDGFB:389, MITF:621, EGFR:1072, IGF1:1256, PDGFRA:1298, FGF16:1376, FGF11:1522, E2F1:1623	0.720744
KEGG_TGF_BETA_SIGNALING_PATHWAY	0.0862063	0.00749207	0.089	0.103053	81	THBS1:323, PPP2R1B:399, ACVRL1:439, SMAD2:583, BMPR2:619, PPP2R1A:678, RBL2:765, SMAD5:779, E2F5:904, BMPR1B:991	0.720744
KEGG_RNA_DEGRADATION	0.100671	0.0121898	0.089	0.124628	52	HSPA9:125, EXOSC7:138, SKIV2L2:513, PAPOLA:522, CNOT7:821, PAPOLB:1274, HSPD1:2157, EXOSC9:2528, PARN:2598, ENO2:3171	0.720744
KEGG_PURINE_METABOLISM	0.0580285	0.0153887	0.089	0.148991	148	PDE6B:36, PDE8A:50, ADCY8:127, AK4:352, GUCY1B3:357, GDA:438, POLR3H:501, ZNRD1:537, NME6:573, PDE3A:642	0.720744
REACTOME_ION_CHANNEL_TRANSPORT	0.0954936	0.0163819	0.09	0.155082	53	GLRB:237, ATP1B1:468, ATP10A:470, ATP8A1:1038, GABRA5:1102, GABRB3:1123, GABRG3:1193, GABRG2:1213, ATP1A2:1303, GLRA1:1314	0.720744
REACTOME_ACTIVATION_OF_RAC	0.143635	0.0730586	0.092	0.349696	13	NCK2:1302, SOS1:2029, PAK2:2318, PAK7:3970, PAK6:4108, PAK1:4604, PAK4:4809, RAC1:5563, ROBO1:8278, SLIT2:8992	0.726228
REACTOME_VITAMIN_B5_PANTOTHENATE_METABOLISM	0.147894	0.0895213	0.094	0.369059	11	PANK4:653, SLC5A6:2798, PPCS:2837, COASY:3689, AASDHPPT:3794, PANK1:6656, PANK3:6677, FASN:6798, PPCDC:10657, PANK2:12516	0.726228
PID_WNT_NONCANONICAL_PATHWAY	0.0932875	0.077287	0.096	0.35548	30	CTHRC1:316, ROR2:591, FZD6:663, WNT5A:728, FZD7:742, FZD5:1271, DVL1:1743, FZD2:3045, CHD7:3552, MAPK8:3876	0.726228
REACTOME_MAPK_TARGETS_NUCLEAR_EVENTS_MEDIATED_BY_MAP_KINASES	0.14223	0.00808758	0.097	0.103359	29	PPP2R1B:399, PPP2R1A:678, MAPK14:729, RPS6KA2:858, PPP2R5D:1076, MAPK7:1284, DUSP6:1574, ATF1:2381, DUSP7:3041, RPS6KA1:3069	0.726228
REACTOME_NEUROTRANSMITTER_RELEASE_CYCLE	0.112005	0.0261325	0.098	0.205877	33	GAD1:1130, SLC38A2:1291, SYT1:1337, ABAT:1354, ALDH5A1:1446, GLS:3040, SLC1A1:3130, STXBP1:3333, SYN3:3860, SLC1A7:4044	0.726228
REACTOME_METABOLISM_OF_AMINO_ACIDS_AND_DERIVATIVES	0.0610842	0.00367722	0.099	0.0744402	193	PSMD3:23, CKMT1A:120, TDO2:124, MAT2A:134, FSHB:281, CKMT2:318, OGDH:342, CKMT1B:362, SLC6A8:529, PSMA8:599	0.726228
REACTOME_REGULATION_OF_GLUCOKINASE_BY_GLUCOKINASE_REGULATORY_PROTEIN	0.163632	0.00327867	0.101	0.0686908	27	GCK:42, NUP155:544, NUP93:575, NUP107:769, SEH1L:1103, NUP205:1336, NUP133:1351, NUP35:1487, NUP37:2441, AAAS:3173	0.726228
REACTOME_ANTIGEN_PROCESSING_CROSS_PRESENTATION	0.0631852	0.0765789	0.101	0.35548	66	PSMD3:23, ITGAV:57, PSMA8:599, MRC1:758, PSMF1:781, CD36:828, PSMB8:1016, PSMC1:1445, PSMD13:1515, ITGB5:1701	0.726228
BIOCARTA_SHH_PATHWAY	0.128221	0.0856894	0.101	0.369059	15	PRKAR2A:154, SHH:581, DYRK1B:978, SUFU:1501, GLI2:3215, PTCH1:4026, PRKAR1A:4276, PRKACB:4366, DYRK1A:5146, PRKAR1B:7755	0.726228
REACTOME_RNA_POL_II_PRE_TRANSCRIPTION_EVENTS	0.115192	0.00637911	0.102	0.101906	47	TAF4B:186, GTF2H4:351, CCNT2:850, ERCC3:1104, TAF12:1283, TCEA1:1297, POLR2A:1995, CDK7:2009, POLR2G:2024, GTF2H1:2481	0.726228
REACTOME_NEUROTRANSMITTER_RECEPTOR_BINDING_AND_DOWNSTREAM_TRANSMISSION_IN_THE_POSTSYNAPTIC_CELL	0.0945115	0.000297139	0.103	0.018083	124	ADCY8:127, GABBR1:217, CHRNA3:322, CACNG2:383, GRIK4:425, PLCB1:629, GRIN2B:679, KCNJ2:683, CAMK2D:687, RPS6KA2:858	0.726228
REACTOME_GLUCOSE_METABOLISM	0.112703	0.00305093	0.108	0.0649848	58	PGM1:397, PPP2R1B:399, PHKB:580, PPP2R1A:678, PFKFB4:760, PPP2R5D:1076, UGP2:1593, PGAM2:1853, MDH2:2120, SLC25A10:2124	0.731343
PID_LYMPH_ANGIOGENESIS_PATHWAY	0.106461	0.0656187	0.109	0.331099	25	CRK:472, MAPK14:729, COL1A1:964, VEGFC:1470, ITGA1:1580, SOS1:2029, FIGF:2696, FN1:2749, RPS6KA1:3069, COL1A2:3097	0.731343
REACTOME_HS_GAG_BIOSYNTHESIS	0.119287	0.0238827	0.11	0.196916	30	NDST4:29, HS3ST2:378, SDC1:817, HS3ST5:920, HS3ST4:1141, GPC5:2208, HS6ST2:2344, HS6ST1:2603, HSPG2:2656, HS2ST1:2986	0.731343
SA_PTEN_PATHWAY	0.146165	0.0370368	0.111	0.250423	17	BPNT1:210, PDK1:358, RBL2:765, PTK2B:814, AKT3:1976, SOS1:2029, ILK:3189, AKT2:5135, PIK3CD:5138, PIK3CA:6240	0.731343
BIOCARTA_EGFR_SMRTE_PATHWAY	0.141962	0.103139	0.112	0.398223	11	NCOR2:271, RARA:609, MAPK14:729, EGFR:1072, MAP2K1:4613, MAP3K1:5929, ZBTB16:7054, RXRA:8834, THRA:10046, THRB:15765	0.731343
REACTOME_GABA_B_RECEPTOR_ACTIVATION	0.103617	0.0396233	0.113	0.257049	33	ADCY8:127, GABBR1:217, KCNJ2:683, GNAL:1425, KCNJ12:1597, GNGT1:1613, ADCY2:2119, ADCY5:2189, GNAI1:2963, GNG12:3811	0.731343
KEGG_AMYOTROPHIC_LATERAL_SCLEROSIS_ALS	0.0690617	0.0885582	0.113	0.369059	51	PRPH2:109, DERL1:611, ALS2:666, GRIN2B:679, MAPK14:729, PPP3CC:1421, SLC1A2:1598, NEFH:1906, CCS:2716, TNFRSF1A:2806	0.731343
REACTOME_GROWTH_HORMONE_RECEPTOR_SIGNALING	0.12548	0.0334854	0.114	0.236789	24	PTPN6:204, IRS2:488, IRS1:504, STAT3:1144, CISH:1471, GH1:1710, STAT5B:1867, STAT1:2745, ADAM17:3306, PRLR:4090	0.731343
PID_TCPTP_PATHWAY	0.0899536	0.043995	0.114	0.27294	42	PDGFB:389, EGFR:1072, INSR:1091, STAT3:1144, ITGA1:1580, STAT5B:1867, PIAS1:2005, SOS1:2029, HGF:2476, VEGFA:2680	0.731343
REACTOME_STRIATED_MUSCLE_CONTRACTION	0.148321	0.00769423	0.115	0.103053	27	DES:227, TPM1:258, VIM:602, MYL1:764, TNNI1:1448, TNNT1:1485, TMOD1:1782, TCAP:1980, DMD:2121, MYBPC2:4165	0.731343
REACTOME_APOPTOSIS	0.0425677	0.0893162	0.118	0.369059	135	PSMD3:23, HIST1H1B:219, LMNA:280, PSMA8:599, VIM:602, PSMF1:781, PSMB8:1016, TJP2:1053, HIST1H1C:1134, NMT1:1350	0.743136
ST_G_ALPHA_I_PATHWAY	0.0862405	0.0778143	0.12	0.35548	35	ITPR1:253, PLCB1:629, EGFR:1072, STAT3:1144, ITPR3:1965, AKT3:1976, SOS1:2029, DRD2:2164, TERF2IP:2536, PLCB2:2584	0.748465
REACTOME_CYCLIN_A_B1_ASSOCIATED_EVENTS_DURING_G2_M_TRANSITION	0.173428	0.0200985	0.122	0.177144	15	CDC25A:9, CCNB2:999, WEE1:1246, CCNA2:1358, CDK7:2009, PKMYT1:2274, CDK1:2472, MNAT1:4823, CCNA1:5261, XPO1:6572	0.751729
REACTOME_PYRUVATE_METABOLISM_AND_CITRIC_ACID_TCA_CYCLE	0.133223	0.00359767	0.124	0.0741583	40	OGDH:342, PDK1:358, SUCLG2:370, IDH3B:450, PDK2:829, ACO2:1074, PDHA1:1199, NNT:1548, SLC16A3:1754, PDK3:1858	0.751729
REACTOME_TRANSPORT_OF_RIBONUCLEOPROTEINS_INTO_THE_HOST_NUCLEUS	0.154422	0.00552284	0.124	0.0928709	27	NUP155:544, NUP93:575, NUP107:769, SEH1L:1103, NUP205:1336, NUP133:1351, NUP35:1487, NUP37:2441, AAAS:3173, NUP188:4291	0.751729
PID_ERBB4_PATHWAY	0.0858682	0.0673598	0.129	0.331099	38	GRIN2B:679, NRG3:1589, STAT5B:1867, BTC:2020, CBFA2T3:2422, EREG:2711, MDM2:2938, NEDD4:2987, ADAM17:3306, PIK3R2:3467	0.759453
REACTOME_P53_DEPENDENT_G1_DNA_DAMAGE_RESPONSE	0.0908252	0.0297602	0.132	0.22639	48	PSMD3:23, PSMA8:599, PSMF1:781, PSMB8:1016, CCNE1:1238, PSMC1:1445, CCNE2:1461, PSMD13:1515, PSMD1:2167, PSMC2:2244	0.759453
BIOCARTA_G1_PATHWAY	0.12629	0.020842	0.133	0.178766	28	CDC25A:9, CCNE1:1238, E2F1:1623, CDKN2A:2077, CDK1:2472, TP53:3198, TGFB2:3325, CDK4:3434, DHFR:3483, CDK6:3531	0.759453
REACTOME_AMINO_ACID_AND_OLIGOPEPTIDE_SLC_TRANSPORTERS	0.0958732	0.0204664	0.138	0.177933	49	SLC6A15:283, SLC1A3:620, SLC1A5:736, SLC38A2:1291, SLC1A2:1598, SLC17A6:1780, SLC6A20:1907, SLC25A10:2124, SLC15A2:2409, SLC7A8:2789	0.759453
BIOCARTA_CTCF_PATHWAY	0.118593	0.0543297	0.138	0.305874	22	SMAD5:779, MYC:1061, CDKN2A:2077, MDM2:2938, CD79B:3103, TP53:3198, TGFBR1:3318, TGFB2:3325, RPS6KB1:5397, CDKN1B:6197	0.759453
REACTOME_ZINC_TRANSPORTERS	0.102654	0.168853	0.138	0.498332	15	SLC39A1:98, SLC30A1:877, SLC39A10:1195, SLC30A7:3939, SLC30A5:4703, SLC39A6:4974, SLC39A4:6932, SLC39A8:8062, SLC39A7:8113, SLC30A3:8990	0.759453
REACTOME_INHIBITION_OF_VOLTAGE_GATED_CA2_CHANNELS_VIA_GBETA_GAMMA_SUBUNITS	0.120628	0.0619919	0.139	0.324398	20	GABBR1:217, KCNJ2:683, KCNJ12:1597, GNGT1:1613, GNG12:3811, KCNJ6:3902, KCNJ3:4151, GABBR2:4283, GNGT2:4432, GNB3:5382	0.759453
REACTOME_PROCESSING_OF_CAPPED_INTRON_CONTAINING_PRE_MRNA	0.0889352	0.0014714	0.14	0.0443564	108	CPSF3:107, PAPOLA:522, FUS:535, NUP155:544, NUP93:575, NUP107:769, HNRNPK:860, SEH1L:1103, NUP205:1336, NUP133:1351	0.759453
BIOCARTA_PTC1_PATHWAY	0.162063	0.0628019	0.141	0.324398	11	CDC25A:9, SHH:581, CDK7:2009, CDK1:2472, PTCH1:4026, MNAT1:4823, XPO1:6572, CCNH:8559, CDC25B:11437, CDC25C:13272	0.759453
PID_ENDOTHELIN_PATHWAY	0.0700649	0.0589665	0.143	0.319871	61	GNA12:22, ADCY8:127, CRK:472, GNA14:486, PLCB1:629, MAPK14:729, PTK2B:814, PRKCA:969, GNAL:1425, PRKCE:2117	0.759453
REACTOME_PYRUVATE_METABOLISM	0.118899	0.0809121	0.144	0.360299	18	PDK1:358, PDK2:829, PDHA1:1199, SLC16A3:1754, PDK3:1858, PDP1:4322, SLC16A1:5459, PDHB:5626, SLC16A8:5795, PDK4:6618	0.759453
REACTOME_SCFSKP2_MEDIATED_DEGRADATION_OF_P27_P21	0.0910561	0.0310752	0.147	0.229561	47	PSMD3:23, PSMF1:781, PSMB8:1016, CCNE1:1238, CCNA2:1358, PSMC1:1445, CCNE2:1461, PSMD13:1515, PSMD1:2167, PSMC2:2244	0.759453
ST_STAT3_PATHWAY	0.122507	0.159586	0.147	0.482569	11	IL6R:1113, STAT3:1144, CISH:1471, JAK3:5081, REG1A:5828, JAK1:6838, SRC:7312, IL6:9672, PTPRU:10180, JAK2:10685	0.759453
REACTOME_NEP_NS2_INTERACTS_WITH_THE_CELLULAR_EXPORT_MACHINERY	0.147798	0.00915189	0.148	0.108853	26	NUP155:544, NUP93:575, NUP107:769, SEH1L:1103, NUP205:1336, NUP133:1351, NUP35:1487, NUP37:2441, AAAS:3173, NUP188:4291	0.759453
KEGG_AXON_GUIDANCE	0.0680423	0.00919889	0.148	0.108853	124	EPHA5:11, SEMA3C:88, SEMA6D:93, EPHA1:121, LRRC4C:303, ARHGEF12:315, SRGAP2:333, SEMA6C:404, EFNA3:897, RASA1:1109	0.759453
REACTOME_INTEGRATION_OF_ENERGY_METABOLISM	0.062719	0.0262698	0.149	0.205877	106	CACNB2:53, ADCY8:127, PRKAR2A:154, MLX:181, PPP2R1B:399, PRKAG2:460, GNA14:486, SLC2A1:600, PLCB1:629, PPP2R1A:678	0.759453
REACTOME_CLASS_C_3_METABOTROPIC_GLUTAMATE_PHEROMONE_RECEPTORS	0.141326	0.0672325	0.149	0.331099	14	GABBR1:217, GRM8:1083, GRM3:1148, GRM2:2107, GRM7:2527, GRM6:3241, GABBR2:4283, GRM4:5315, TAS1R3:6425, TAS1R2:10265	0.759453
REACTOME_IL_6_SIGNALING	0.130861	0.151989	0.149	0.473761	10	IL6R:1113, STAT3:1144, CBL:1164, STAT1:2745, IL6ST:3354, JAK1:6838, IL6:9672, JAK2:10685, TYK2:15778, SOCS3:15891	0.759453
REACTOME_G_ALPHA_S_SIGNALLING_EVENTS	0.0478903	0.0799155	0.15	0.358031	113	ADCYAP1:37, PDE8A:50, ADCY8:127, DRD5:214, FSHB:281, ADCYAP1R1:366, PTH1R:372, VIPR1:584, PDE3A:642, MC3R:807	0.759453
REACTOME_GABA_SYNTHESIS_RELEASE_REUPTAKE_AND_DEGRADATION	0.135528	0.0606588	0.151	0.324398	16	GAD1:1130, SYT1:1337, ABAT:1354, ALDH5A1:1446, STXBP1:3333, SLC6A1:4120, SLC32A1:4599, RIMS1:6455, HSPA8:6775, GAD2:7031	0.759453
BIOCARTA_CCR5_PATHWAY	0.134389	0.0818095	0.151	0.362198	14	MAPK14:729, PTK2B:814, PRKCA:969, CCR5:1157, MAPK8:3876, GNAQ:4201, PRKCB:6392, JUN:8084, CCL2:8143, FOS:8299	0.759453
REACTOME_CITRIC_ACID_CYCLE_TCA_CYCLE	0.175316	0.00819384	0.152	0.103563	19	OGDH:342, SUCLG2:370, IDH3B:450, ACO2:1074, NNT:1548, MDH2:2120, DLST:2151, IDH3A:2955, SDHA:3480, SUCLG1:3764	0.759453
BIOCARTA_NOS1_PATHWAY	0.143945	0.0400059	0.153	0.25822	17	PRKAR2A:154, GRIN2B:679, PRKCA:969, PPP3CC:1421, DLG4:3565, PRKAR1A:4276, PRKACB:4366, PRKCB:6392, PPP3CA:6402, GRIN1:6695	0.759453
REACTOME_TRANSPORT_OF_MATURE_TRANSCRIPT_TO_CYTOPLASM	0.097592	0.0195339	0.154	0.173363	48	CPSF3:107, NUP155:544, NUP93:575, NUP107:769, SEH1L:1103, NUP205:1336, NUP133:1351, NUP35:1487, CPSF1:2147, NUP37:2441	0.759453
KEGG_MELANOGENESIS	0.0596339	0.0442194	0.157	0.273007	96	WNT7B:48, WNT6:82, ADCY8:127, MITF:621, PLCB1:629, FZD6:663, CAMK2D:687, WNT5A:728, FZD7:742, PRKCA:969	0.759453
KEGG_RNA_POLYMERASE	0.0985796	0.0948416	0.158	0.381156	24	POLR3H:501, ZNRD1:537, POLR2A:1995, POLR2G:2024, POLR1C:2688, POLR2D:3372, POLR3C:3785, POLR3F:4180, POLR3K:4396, POLR3G:4878	0.759453
PID_E2F_PATHWAY	0.0921252	0.00664167	0.159	0.102621	73	CDC25A:9, E2F3:380, CEBPA:755, RBL2:765, E2F5:904, SMARCA2:1040, MYC:1061, CCNE1:1238, CCNA2:1358, CCNE2:1461	0.759453
REACTOME_PLATELET_HOMEOSTASIS	0.0680516	0.0512014	0.161	0.294734	69	PDE6B:36, SLC8A3:54, PTPN6:204, GUCY1B3:357, PPP2R1B:399, PDE3A:642, PPP2R1A:678, MAPK14:729, PPP2R5D:1076, PDE1A:1155	0.759453
KEGG_ENDOCYTOSIS	0.0378328	0.0899477	0.161	0.369624	171	SH3GL2:66, RET:265, IGF1R:379, PLD1:548, VPS37C:627, CHMP4C:745, HSPA1L:803, HSPA2:811, SNF8:832, HGS:946	0.759453
REACTOME_RNA_POL_I_TRANSCRIPTION_INITIATION	0.0998145	0.0977606	0.168	0.386805	23	GTF2H4:351, ERCC3:1104, EHMT2:1561, CDK7:2009, GTF2H1:2481, POLR1C:2688, MNAT1:4823, GTF2H2:4885, GTF2H2B:5370, POLR1B:5604	0.759453
REACTOME_FORMATION_OF_TRANSCRIPTION_COUPLED_NER_TC_NER_REPAIR_COMPLEX	0.0955605	0.112912	0.168	0.408137	23	GTF2H4:351, ERCC3:1104, TCEA1:1297, POLR2A:1995, CDK7:2009, POLR2G:2024, GTF2H1:2481, POLR2D:3372, MNAT1:4823, GTF2H2:4885	0.759453
BIOCARTA_EDG1_PATHWAY	0.0803385	0.156566	0.168	0.479314	26	ITGAV:57, PLCB1:629, PRKCA:969, PDGFRA:1298, GNGT1:1613, GNAI1:2963, PTK2:3817, S1PR1:5132, RAC1:5563, PIK3CA:6240	0.759453
BIOCARTA_DREAM_PATHWAY	0.147158	0.0662942	0.171	0.331099	13	PRKAR2A:154, CREM:1944, POLR2A:1995, KCNIP3:4140, PRKAR1A:4276, PRKACB:4366, OPRK1:4607, PRKAR1B:7755, JUN:8084, FOS:8299	0.759453
BIOCARTA_AGPCR_PATHWAY	0.136086	0.102735	0.174	0.398223	12	PRKAR2A:154, PRKCA:969, GNGT1:1613, PRKAR1A:4276, PRKACB:4366, GRK4:6357, PRKCB:6392, GNAS:7041, PRKAR1B:7755, PRKAR2B:11454	0.759453
REACTOME_SULFUR_AMINO_ACID_METABOLISM	0.100751	0.0877872	0.175	0.369059	24	MAT2A:134, ADI1:1036, GCLM:1070, AHCY:1326, SQRDL:1707, SLC25A10:2124, MTR:4188, CTH:4367, ETHE1:6201, TST:6764	0.759453
ST_WNT_CA2_CYCLIC_GMP_PATHWAY	0.0998836	0.122249	0.175	0.425027	20	PDE6B:36, ITPR1:253, CAMK2D:687, CAMK2B:1484, PDE6H:1530, ITPR3:1965, ITPKB:3423, DAG1:3427, PDE6D:4282, ITPKA:5645	0.759453
REACTOME_ERKS_ARE_INACTIVATED	0.181162	0.0375384	0.178	0.251173	11	PPP2R1B:399, PPP2R1A:678, PPP2R5D:1076, MAPK7:1284, DUSP6:1574, DUSP7:3041, DUSP3:8468, PPP2CB:9241, MAPK3:9922, DUSP4:13447	0.759453
BIOCARTA_GH_PATHWAY	0.106209	0.0563285	0.18	0.311636	27	PTPN6:204, IRS1:504, PRKCA:969, INSR:1091, GH1:1710, STAT5B:1867, SOS1:2029, RPS6KA1:3069, STAT5A:4125, MAP2K1:4613	0.759453
KEGG_GAP_JUNCTION	0.0530025	0.0885068	0.18	0.369059	87	ADCY8:127, ITPR1:253, GUCY1B3:357, PDGFB:389, TUBA3E:417, GJA1:626, PLCB1:629, HTR2C:673, TUBA3C:720, TUBA3D:787	0.759453
BIOCARTA_BIOPEPTIDES_PATHWAY	0.0689914	0.136525	0.181	0.453191	39	CAMK2D:687, MAPK14:729, PTK2B:814, PRKCA:969, STAT3:1144, CAMK2B:1484, GNGT1:1613, STAT4:1717, STAT5B:1867, SOS1:2029	0.759453
REACTOME_GLYCOLYSIS	0.118136	0.0410604	0.183	0.262376	25	PPP2R1B:399, PPP2R1A:678, PFKFB4:760, PPP2R5D:1076, PGAM2:1853, PFKFB1:2432, ENO2:3171, PKLR:3626, PFKFB3:4787, PFKFB2:4788	0.759453
KEGG_LONG_TERM_DEPRESSION	0.0552898	0.115784	0.183	0.410107	68	GNA12:22, ITPR1:253, GUCY1B3:357, IGF1R:379, PPP2R1B:399, PLCB1:629, PPP2R1A:678, PRKCA:969, IGF1:1256, CRHR1:1344	0.759453
SA_TRKA_RECEPTOR	0.107	0.138583	0.184	0.457105	16	AKT3:1976, SOS1:2029, NGFR:2746, NGF:3896, MAP2K1:4613, NTRK1:4998, AKT2:5135, PIK3CD:5138, CDKN1A:5573, ELK1:6118	0.759453
REACTOME_CELL_CELL_JUNCTION_ORGANIZATION	0.0740688	0.0556993	0.185	0.309494	56	CDH8:157, CDH4:178, CDH6:179, PVRL1:510, JUP:917, PVRL3:957, CLDN8:1047, CLDN10:1063, CDH2:1115, PVRL4:1316	0.759453
PID_SHP2_PATHWAY	0.070015	0.0705035	0.185	0.340013	56	ANGPT1:1, IGF1R:379, PDGFB:389, IRS1:504, EGFR:1072, IL6R:1113, IGF1:1256, FRS3:1658, SOS1:2029, VEGFA:2680	0.759453
BIOCARTA_CDC42RAC_PATHWAY	0.120669	0.147933	0.185	0.464517	12	ARPC2:1110, PDGFRA:1298, ARPC1A:3967, ACTR3:4431, PAK1:4604, RAC1:5563, PIK3CA:6240, ARPC5:8009, ARPC1B:8765, PIK3R1:10602	0.759453
KEGG_GLIOMA	0.0768856	0.0367015	0.186	0.249492	62	IGF1R:379, E2F3:380, PDGFB:389, CAMK2D:687, PRKCA:969, EGFR:1072, IGF1:1256, PDGFRA:1298, CAMK2B:1484, E2F1:1623	0.759453
PID_ERBB_NETWORK_PATHWAY	0.108836	0.144633	0.186	0.46095	15	EGFR:1072, NRG3:1589, TGFA:1755, BTC:2020, EREG:2711, ERBB4:4062, ERBB2:4708, NRG1:5301, AREG:6844, ERBB3:9738	0.759453
BIOCARTA_ETS_PATHWAY	0.101513	0.136174	0.187	0.453191	18	NCOR2:271, RBL2:765, HDAC5:1505, DDX20:1542, E2F1:1623, E2F4:2522, RBL1:3744, ETV3:6619, SIN3A:7366, JUN:8084	0.759453
REACTOME_G1_S_TRANSITION	0.0625663	0.0320912	0.189	0.230408	99	CDC25A:9, PSMD3:23, PPP2R1B:399, MCM6:625, PPP2R1A:678, PRIM2:743, PSMF1:781, PSMB8:1016, MYC:1061, CCNE1:1238	0.759453
REACTOME_SMAD2_SMAD3_SMAD4_HETEROTRIMER_REGULATES_TRANSCRIPTION	0.111926	0.06335	0.189	0.325146	23	SMAD2:583, CCNT2:850, E2F5:904, MYC:1061, E2F4:2522, CDK9:3446, CDKN2B:3572, TFDP1:3608, RBL1:3744, SMAD3:3788	0.759453
BIOCARTA_RB_PATHWAY	0.129967	0.104826	0.191	0.398848	13	MAPK14:729, MYT1:766, WEE1:1246, CDK1:2472, TP53:3198, CDK4:3434, CHEK1:4112, CDK2:6935, CDC25B:11437, RB1:12520	0.759453
BIOCARTA_ERYTH_PATHWAY	0.120039	0.107634	0.191	0.401039	15	IGF1:1256, CCL3:2209, TGFB2:3325, CSF3:3356, IL11:4041, IL3:4496, KITLG:5434, FLT3:5467, TGFB3:6676, IL1A:6781	0.759453
SIG_INSULIN_RECEPTOR_PATHWAY_IN_CARDIAC_MYOCYTES	0.0744527	0.07483	0.193	0.351591	48	FLOT2:116, PDK1:358, IRS2:488, IRS1:504, RPS6KA2:858, CBL:1164, FLOT1:1612, AKT3:1976, SOS1:2029, CDKN2A:2077	0.759453
REACTOME_LIPID_DIGESTION_MOBILIZATION_AND_TRANSPORT	0.0921013	0.039186	0.194	0.256819	42	LCAT:344, CAV1:650, SDC1:817, PPP1CC:1222, ABHD5:1329, LDLR:1895, PLTP:2116, APOA2:2487, PLIN1:2563, HSPG2:2656	0.759453
PID_VEGFR1_PATHWAY	0.0992367	0.0801227	0.194	0.358031	26	PGF:304, CAV1:650, PRKCA:969, RASA1:1109, CBL:1164, VEGFA:2680, NRP2:3286, PRKACA:3464, CD2AP:5323, FLT1:5378	0.759453
SA_G1_AND_S_PHASES	0.165014	0.0478622	0.195	0.286565	12	E2F1:1623, CDKN2A:2077, MDM2:2938, TP53:3198, CDK4:3434, E2F2:4456, CDKN1A:5573, CDKN1B:6197, NXT1:6232, CDK2:6935	0.759453
PID_RET_PATHWAY	0.0840354	0.0772922	0.195	0.35548	37	RET:265, CRK:472, IRS2:488, IRS1:504, PRKCA:969, GDNF:1077, RASA1:1109, DOK4:1266, SOS1:2029, GRB7:2173	0.759453
REACTOME_TRANSPORT_OF_INORGANIC_CATIONS_ANIONS_AND_AMINO_ACIDS_OLIGOPEPTIDES	0.0654768	0.0305287	0.197	0.229504	92	SLC8A3:54, SLC4A4:238, SLC6A15:283, SLC12A6:317, SLC1A3:620, SLC12A4:623, SLC1A5:736, SLC38A2:1291, SLC24A2:1456, SLC1A2:1598	0.759453
REACTOME_CELL_JUNCTION_ORGANIZATION	0.0605382	0.0670397	0.198	0.331099	77	CDH8:157, CDH4:178, CDH6:179, LAMA3:422, PVRL1:510, JUP:917, PVRL3:957, CLDN8:1047, CLDN10:1063, CDH2:1115	0.759453
REACTOME_FGFR2C_LIGAND_BINDING_AND_ACTIVATION	0.11423	0.17079	0.202	0.498332	12	FGFR2:2403, FGF8:2538, FGF20:3748, FGF23:5239, FGF6:5325, FGF17:5902, FGF1:8633, FGF18:8680, FGF5:8910, FGF2:9655	0.759453
REACTOME_REGULATION_OF_WATER_BALANCE_BY_RENAL_AQUAPORINS	0.0689096	0.158801	0.205	0.482061	35	ADCY8:127, PRKAR2A:154, AVP:950, AQP4:1378, GNGT1:1613, GNB5:1846, ADCY2:2119, ADCY5:2189, PRKACA:3464, GNG12:3811	0.759453
REACTOME_DARPP_32_EVENTS	0.126673	0.0629505	0.206	0.324398	18	PRKAR2A:154, PPP2R1B:399, PPP2R1A:678, PPP2R5D:1076, PDE4D:1687, PRKACA:3464, PRKAR1A:4276, PRKACB:4366, PPP1CA:5830, PPP3CA:6402	0.759453
REACTOME_INHIBITION_OF_REPLICATION_INITIATION_OF_DAMAGED_DNA_BY_RB1_E2F1	0.132813	0.127312	0.207	0.43504	11	PPP2R1B:399, PPP2R1A:678, PRIM2:743, E2F1:1623, TFDP1:3608, POLA1:6937, PRIM1:7895, PPP2CB:9241, RB1:12520, POLA2:13895	0.759453
PID_P73PATHWAY	0.0528874	0.109609	0.21	0.405301	77	HEY2:72, FLOT2:116, BUB3:199, BIN1:277, NDUFS2:326, GRAMD4:694, MAPK14:729, MYC:1061, CASP2:1132, CCNA2:1358	0.759453
BIOCARTA_ARENRF2_PATHWAY	0.112485	0.177417	0.212	0.510675	12	MAPK14:729, PRKCA:969, MAFG:3277, MAPK8:3876, KEAP1:5523, MAFF:6125, PRKCB:6392, JUN:8084, FOS:8299, MAFK:9398	0.759453
REACTOME_NEPHRIN_INTERACTIONS	0.111939	0.0913782	0.213	0.372123	19	KIRREL3:294, SPTBN1:685, NCK2:1302, MAGI2:3365, ACTN1:3421, PIK3R2:3467, IQGAP1:4042, FYN:4399, CD2AP:5323, PIK3CA:6240	0.759453
REACTOME_IL_7_SIGNALING	0.145067	0.0958185	0.214	0.382602	11	STAT5B:1867, HGF:2476, PIK3R2:3467, STAT5A:4125, IL2RG:4566, JAK3:5081, JAK1:6838, IL7:8670, PIK3R3:9825, PIK3R1:10602	0.759453
REACTOME_FACTORS_INVOLVED_IN_MEGAKARYOCYTE_DEVELOPMENT_AND_PLATELET_PRODUCTION	0.0399854	0.141972	0.215	0.458182	114	PRKAR2A:154, DOCK3:165, DOCK4:184, ZFPM2:369, HIST1H3G:810, KIF23:884, WEE1:1246, AKAP10:1678, EHD2:1752, KIF9:1869	0.759453
KEGG_BASAL_TRANSCRIPTION_FACTORS	0.0967584	0.0625251	0.216	0.324398	31	TAF4B:186, GTF2H4:351, TAF12:1283, TAF6L:1682, TAF5L:1786, GTF2H1:2481, TAF5:2702, GTF2A2:3505, TAF7L:3965, TAF11:4435	0.759453
PID_PDGFRB_PATHWAY	0.0426279	0.106922	0.217	0.400722	121	ITGAV:57, DOCK4:184, PDGFB:389, CRK:472, PPP2R1A:678, PRKCA:969, MYC:1061, RASA1:1109, ARPC2:1110, STAT3:1144	0.759453
REACTOME_SIGNALING_BY_NOTCH4	0.122342	0.142393	0.222	0.458385	12	DLL1:934, DLL4:2155, NOTCH4:2384, PSEN2:2805, JAG2:4318, APH1A:4995, APH1B:5643, JAG1:6143, PSEN1:9855, NCSTN:10420	0.759453
REACTOME_SIGNALING_BY_NOTCH2	0.131923	0.113691	0.223	0.408137	12	NOTCH2:332, DLL1:934, DLL4:2155, PSEN2:2805, JAG2:4318, APH1A:4995, APH1B:5643, JAG1:6143, PSEN1:9855, NCSTN:10420	0.759453
REACTOME_BASIGIN_INTERACTIONS	0.103311	0.0800214	0.224	0.358031	24	ATP1B1:468, CAV1:650, SLC16A3:1754, PPIA:2296, ITGA3:2562, SLC7A8:2789, SLC7A11:3121, MMP1:4714, SLC16A1:5459, SLC16A8:5795	0.759453
PID_HES_HEY_PATHWAY	0.0608397	0.145455	0.225	0.462418	48	HEY2:72, NCOR2:271, CTBP1:454, CAMK2D:687, RBPJ:838, AR:960, STAT3:1144, RUNX2:1434, E2F1:1623, HES6:1777	0.759453
REACTOME_MUSCLE_CONTRACTION	0.0967809	0.0344262	0.229	0.239113	40	MYL9:32, DES:227, TPM1:258, VIM:602, MYL1:764, TNNI1:1448, TNNT1:1485, ITGA1:1580, ITGB5:1701, TMOD1:1782	0.759453
REACTOME_BRANCHED_CHAIN_AMINO_ACID_CATABOLISM	0.136717	0.0511098	0.229	0.294734	17	HSD17B10:1247, DBT:1304, BCKDHA:1905, HIBCH:2511, MCCC1:4453, BCAT1:4929, ACAD8:4948, IVD:6432, HIBADH:6689, BCAT2:6726	0.759453
REACTOME_TRANSCRIPTIONAL_ACTIVITY_OF_SMAD2_SMAD3_SMAD4_HETEROTRIMER	0.0954224	0.0620254	0.23	0.324398	32	NCOR2:271, SMAD2:583, CCNT2:850, E2F5:904, MYC:1061, E2F4:2522, CDK9:3446, CDKN2B:3572, TFDP1:3608, RBL1:3744	0.759453
KEGG_BLADDER_CANCER	0.0762595	0.0877261	0.23	0.369059	42	MMP2:153, PGF:304, THBS1:323, E2F3:380, MYC:1061, EGFR:1072, VEGFC:1470, E2F1:1623, CDKN2A:2077, VEGFA:2680	0.759453
KEGG_WNT_SIGNALING_PATHWAY	0.0541894	0.0276739	0.231	0.214347	140	WNT7B:48, WNT6:82, PRICKLE2:156, PPP2R1B:399, CTBP1:454, CCND2:459, LRP6:545, CSNK1E:552, SMAD2:583, PLCB1:629	0.759453
REACTOME_ER_PHAGOSOME_PATHWAY	0.0605105	0.131901	0.231	0.447133	52	PSMD3:23, PSMA8:599, PSMF1:781, PSMB8:1016, PSMC1:1445, PSMD13:1515, PSMD1:2167, PSMC2:2244, SEC61A2:2640, PSMD4:3016	0.759453
REACTOME_MITOCHONDRIAL_PROTEIN_IMPORT	0.0622364	0.140565	0.231	0.457105	47	HSPA9:125, GRPEL1:295, VDAC1:445, ACO2:1074, TAZ:1865, TIMM8A:1919, TIMM50:2063, HSPD1:2157, PMPCA:2159, TIMM22:2358	0.759453
KEGG_TYPE_II_DIABETES_MELLITUS	0.0804606	0.0622556	0.233	0.324398	45	GCK:42, CACNA1D:300, IRS2:488, IRS1:504, CACNA1B:624, INSR:1091, PRKCE:2117, IRS4:3319, KCNJ11:3457, PIK3R2:3467	0.759453
REACTOME_METABOLISM_OF_NON_CODING_RNA	0.0919295	0.0419665	0.234	0.265511	41	NUP155:544, NUP93:575, NUP107:769, SEH1L:1103, NUP205:1336, NUP133:1351, NUP35:1487, DDX20:1542, NUP37:2441, PRMT5:2571	0.759453
REACTOME_NCAM1_INTERACTIONS	0.0848264	0.0671626	0.236	0.331099	39	COL4A1:49, CACNB2:53, COL4A2:123, COL5A1:717, COL5A2:770, COL1A1:964, GDNF:1077, PRNP:1452, CACNB1:2110, COL9A3:2851	0.759453
REACTOME_ELONGATION_ARREST_AND_RECOVERY	0.0943682	0.144271	0.236	0.460947	20	CCNT2:850, TCEA1:1297, POLR2A:1995, POLR2G:2024, POLR2D:3372, CDK9:3446, SSRP1:4315, POLR2C:5057, SUPT5H:6089, GTF2F2:6107	0.759453
ST_GAQ_PATHWAY	0.0639185	0.242175	0.236	0.596339	28	ITPR1:253, PDK1:358, PLD1:548, NFKBIL1:1650, ITPR3:1965, AKT3:1976, ITPKB:3423, DAG1:3427, GNAQ:4201, NFKB1:4933	0.759453
REACTOME_CDK_MEDIATED_PHOSPHORYLATION_AND_REMOVAL_OF_CDC6	0.0742647	0.100376	0.237	0.392816	41	PSMD3:23, PSMA8:599, PSMF1:781, PSMB8:1016, PSMC1:1445, PSMD13:1515, PSMD1:2167, PSMC2:2244, PSMD4:3016, PSMB4:3064	0.759453
KEGG_BASAL_CELL_CARCINOMA	0.0702162	0.0722243	0.238	0.347003	55	WNT7B:48, WNT6:82, SHH:581, FZD6:663, WNT5A:728, FZD7:742, FZD5:1271, TCF7L1:1349, SUFU:1501, FZD10:1692	0.759453
REACTOME_PROCESSING_OF_INTRONLESS_PRE_MRNAS	0.153596	0.0655214	0.241	0.331099	12	CPSF3:107, PAPOLA:522, PCF11:2105, CPSF1:2147, NCBP1:2764, CPSF7:2991, CLP1:7329, CSTF3:7348, CSTF2:9050, CPSF2:10437	0.759453
REACTOME_ALPHA_LINOLENIC_ACID_ALA_METABOLISM	0.164099	0.0595684	0.242	0.321217	11	FADS2:750, ELOVL5:1312, FADS1:4363, ELOVL2:5663, SCP2:5677, HSD17B4:6436, ABCD1:7299, ACAA1:8265, ACOT8:8586, ACOX1:9304	0.759453
REACTOME_REGULATION_OF_ORNITHINE_DECARBOXYLASE_ODC	0.072841	0.0914292	0.243	0.372123	45	PSMD3:23, PSMA8:599, OAZ3:656, PSMF1:781, PSMB8:1016, PSMC1:1445, PSMD13:1515, OAZ2:1662, PSMD1:2167, PSMC2:2244	0.759453
REACTOME_CROSS_PRESENTATION_OF_SOLUBLE_EXOGENOUS_ANTIGENS_ENDOSOMES	0.0716796	0.100479	0.244	0.392816	44	PSMD3:23, PSMA8:599, MRC1:758, PSMF1:781, PSMB8:1016, PSMC1:1445, PSMD13:1515, PSMD1:2167, PSMC2:2244, PSMD4:3016	0.759453
REACTOME_FATTY_ACYL_COA_BIOSYNTHESIS	0.127476	0.061299	0.248	0.324398	18	ACACA:951, ELOVL5:1312, HSD17B12:2577, TECR:2713, ELOVL4:3073, ACSL6:3353, ELOVL3:5296, ELOVL2:5663, ACSL5:6581, FASN:6798	0.759453
[truncated: 558 more rows]
