# Supplementary material for: Pan-mammalian analysis of molecular constraints underlying extended lifespan
Source: eLife. 2020 Feb 11;9:e51089. doi: 10.7554/eLife.51089 (PMC7012612; doi:10.7554/eLife.51089)
Supplement: Supplementary file 3. — Pathway group membership for the 3L phenotype as depicted in Figure 2. [file elife-51089-supp3.xlsx]

## Sheet: 3L (PC1) Pathway Groups
	group membership
KEGG_CYTOKINE_CYTOKINE_RECEPTOR_INTERACTION	1
NABA_SECRETED_FACTORS	1
REACTOME_CHEMOKINE_RECEPTORS_BIND_CHEMOKINES	1
KEGG_JAK_STAT_SIGNALING_PATHWAY	1
NABA_MATRISOME_ASSOCIATED	1
REACTOME_PEPTIDE_LIGAND_BINDING_RECEPTORS	1
KEGG_CHEMOKINE_SIGNALING_PATHWAY	1
BIOCARTA_NKT_PATHWAY	1
KEGG_SMALL_CELL_LUNG_CANCER	1
BIOCARTA_CYTOKINE_PATHWAY	1
PID_IL27_PATHWAY	1
BIOCARTA_TH1TH2_PATHWAY	1
BIOCARTA_RACCYCD_PATHWAY	1
PID_IL2_STAT5_PATHWAY	1
BIOCARTA_INFLAM_PATHWAY	1
REACTOME_CELL_CYCLE	2
REACTOME_CELL_CYCLE_MITOTIC	2
REACTOME_MITOTIC_PROMETAPHASE	2
REACTOME_DNA_REPLICATION	2
REACTOME_MITOTIC_M_M_G1_PHASES	2
KEGG_CELL_CYCLE	2
PID_ATR_PATHWAY	2
REACTOME_G2_M_CHECKPOINTS	2
REACTOME_G1_PHASE	2
REACTOME_CDC6_ASSOCIATION_WITH_THE_ORC_ORIGIN_COMPLEX	2
REACTOME_ACTIVATION_OF_ATR_IN_RESPONSE_TO_REPLICATION_STRESS	2
REACTOME_ASSOCIATION_OF_LICENSING_FACTORS_WITH_THE_PRE_REPLICATIVE_COMPLEX	2
REACTOME_MITOTIC_G2_G2_M_PHASES	2
REACTOME_E2F_ENABLED_INHIBITION_OF_PRE_REPLICATION_COMPLEX_FORMATION	2
BIOCARTA_G1_PATHWAY	2
BIOCARTA_RB_PATHWAY	2
REACTOME_RECRUITMENT_OF_MITOTIC_CENTROSOME_PROTEINS_AND_COMPLEXES	2
REACTOME_INNATE_IMMUNE_SYSTEM	3
REACTOME_IMMUNE_SYSTEM	3
REACTOME_RIG_I_MDA5_MEDIATED_INDUCTION_OF_IFN_ALPHA_BETA_PATHWAYS	3
KEGG_RIG_I_LIKE_RECEPTOR_SIGNALING_PATHWAY	3
KEGG_CYTOSOLIC_DNA_SENSING_PATHWAY	3
KEGG_TOLL_LIKE_RECEPTOR_SIGNALING_PATHWAY	3
REACTOME_TRAF6_MEDIATED_IRF7_ACTIVATION	3
REACTOME_CYTOKINE_SIGNALING_IN_IMMUNE_SYSTEM	3
PID_BCR_5PATHWAY	3
REACTOME_DEFENSINS	3
BIOCARTA_NFKB_PATHWAY	3
PID_EPO_PATHWAY	3
BIOCARTA_TOLL_PATHWAY	3
BIOCARTA_RELA_PATHWAY	3
REACTOME_TRAF6_MEDIATED_NFKB_ACTIVATION	3
BIOCARTA_TNFR2_PATHWAY	3
PID_CD8_TCR_DOWNSTREAM_PATHWAY	3
PID_FCER1_PATHWAY	3
REACTOME_FACTORS_INVOLVED_IN_MEGAKARYOCYTE_DEVELOPMENT_AND_PLATELET_PRODUCTION	3
BIOCARTA_CD40_PATHWAY	3
BIOCARTA_STRESS_PATHWAY	3
REACTOME_NFKB_ACTIVATION_THROUGH_FADD_RIP1_PATHWAY_MEDIATED_BY_CASPASE_8_AND10	3
BIOCARTA_IL22BP_PATHWAY	3
PID_NFKAPPAB_CANONICAL_PATHWAY	3
PID_FANCONI_PATHWAY	4
BIOCARTA_ATRBRCA_PATHWAY	4
REACTOME_FANCONI_ANEMIA_PATHWAY	4
REACTOME_EXTRINSIC_PATHWAY_FOR_APOPTOSIS	5
BIOCARTA_DEATH_PATHWAY	5
BIOCARTA_HIVNEF_PATHWAY	5
PID_HIV_NEF_PATHWAY	5
BIOCARTA_SODD_PATHWAY	5
ST_TUMOR_NECROSIS_FACTOR_PATHWAY	5
REACTOME_G_ALPHA1213_SIGNALLING_EVENTS	6
REACTOME_CELL_DEATH_SIGNALLING_VIA_NRAGE_NRIF_AND_NADE	6
REACTOME_NRAGE_SIGNALS_DEATH_THROUGH_JNK	6
PID_PLK1_PATHWAY	NA
PID_IL23_PATHWAY	NA
BIOCARTA_TALL1_PATHWAY	NA
PID_RHOA_REG_PATHWAY	NA
KEGG_HOMOLOGOUS_RECOMBINATION	NA
REACTOME_NUCLEAR_SIGNALING_BY_ERBB4	NA
PID_IGF1_PATHWAY	NA
REACTOME_PRE_NOTCH_TRANSCRIPTION_AND_TRANSLATION	NA
BIOCARTA_NO2IL12_PATHWAY	NA
PID_IL4_2PATHWAY	NA
REACTOME_PEPTIDE_HORMONE_BIOSYNTHESIS	NA
REACTOME_CLASS_B_2_SECRETIN_FAMILY_RECEPTORS	NA
PID_TELOMERASE_PATHWAY	NA
REACTOME_GLUCAGON_TYPE_LIGAND_RECEPTORS	NA
PID_P53_REGULATION_PATHWAY	NA
KEGG_BLADDER_CANCER	NA
ST_FAS_SIGNALING_PATHWAY	NA
