# Supplementary material for: Pan-mammalian analysis of molecular constraints underlying extended lifespan
Source: eLife. 2020 Feb 11;9:e51089. doi: 10.7554/eLife.51089 (PMC7012612; doi:10.7554/eLife.51089)
Supplement: Supplementary file 4. — Correlation statistics between gene evolutionary rates and phenotype values as obtained from RERconverge for both the 3L and ELL phenotypes separated by correlation direction. Also included are statistics from species removal analyses. [file elife-51089-supp4.xlsx]

## Sheet: 3L (PC1) Negative Correlations
	Rho	N	P	Padj	qval	SubtreeVariance	nomarineRho	nomarineP	nomarinePadj	nobatnmrRho	nobatnmrP	nobatnmrPadj
KNTC1	-0.393241	115	1.37727e-05	0.0815359	0.0695419	0.00753313	-0.385472	4.49437e-05	0.0980082	-0.316405	0.0010671	0.358855
C18orf63	-0.377677	114	3.43462e-05	0.0904663	0.0771587	0.00666456	-0.380036	5.86553e-05	0.0980082	-0.330155	0.000659603	0.317485
SALL4	-0.383656	109	3.82118e-05	0.0904663	0.0771587	0.0148508	-0.380176	8.80112e-05	0.0980082	-0.330778	0.000878841	0.326801
WWTR1	-0.438908	76	7.30487e-05	0.119549	0.101963	0.0158016	-0.443028	8.66935e-05	0.0980082	-0.411312	0.0004465	0.317271
SOCS6	-0.397478	93	7.97573e-05	0.119549	0.101963	0.0185518	-0.399594	0.000125933	0.117451	-0.340043	0.00155235	0.408751
PVRIG	-0.422704	80	9.38249e-05	0.119549	0.101963	0.00699042	-0.422348	0.000117292	0.116866	-0.372491	0.00162228	0.408751
TTF1	-0.366141	108	9.73927e-05	0.119549	0.101963	0.00830958	-0.386253	7.21282e-05	0.0980082	-0.295297	0.00315811	0.415116
C3AR1	-0.357282	113	0.000102433	0.119549	0.101963	0.00660158	-0.381183	6.54783e-05	0.0980082	-0.290154	0.00294866	0.415116
MAP3K4	-0.365518	105	0.000125991	0.123895	0.10567	0.00975994	-0.359557	0.000276735	0.169517	-0.33283	0.000921909	0.329243
LINS	-0.347748	116	0.000130829	0.123895	0.10567	0.00749307	-0.372276	8.50926e-05	0.0980082	-0.29393	0.00245791	0.410762
ALPK2	-0.339588	119	0.000157911	0.13054	0.111337	0.00900482	-0.370134	7.4508e-05	0.0980082	-0.297523	0.00185664	0.408751
CDH19	-0.348035	113	0.000158523	0.13054	0.111337	0.0050181	-0.341364	0.000417445	0.183883	-0.328155	0.000807701	0.32528
ARHGEF25	-0.359738	102	0.00020439	0.154846	0.132068	0.00845616	-0.360398	0.000309866	0.169517	-0.304911	0.00329511	0.41859
ANKRD30B	-0.548252	40	0.000249897	0.156139	0.133171	0.00372615	-0.608892	0.000132747	0.117451	-0.481742	0.00293083	0.415116
METTL18	-0.351587	104	0.000252479	0.156139	0.133171	0.0100529	-0.360013	0.000339066	0.17306	-0.302328	0.00306048	0.415116
IGSF10	-0.333166	116	0.00025776	0.156139	0.133171	0.00724556	-0.346892	0.000251742	0.169517	-0.376256	7.63069e-05	0.145608
GCNT7	-0.368074	94	0.000262368	0.156139	0.133171	0.0131812	-0.376918	0.000347382	0.17306	-0.315022	0.00351532	0.423809
SASH1	-0.341745	108	0.000294818	0.169208	0.144317	0.0111388	-0.346596	0.000358904	0.174216	-0.297012	0.0029793	0.415116
RTTN	-0.329669	115	0.000320918	0.173662	0.148116	0.0156882	-0.347958	0.00027565	0.169517	-0.29022	0.00294182	0.415116
AKAP13	-0.324603	117	0.000356148	0.182705	0.155829	0.0197357	-0.341865	0.000313406	0.169517	-0.254503	0.00879417	0.484027
B3GALNT2	-0.339764	105	0.000391178	0.189972	0.162027	0.0243216	-0.332164	0.000782471	0.245102	-0.284902	0.00513624	0.451464
CD101	-0.325889	114	0.000402713	0.190685	0.162635	0.0162858	-0.322694	0.000786962	0.245102	-0.273125	0.00547885	0.463691
EFCAB6	-0.32461	114	0.000425716	0.19255	0.164226	0.00797545	-0.340016	0.00041335	0.183883	-0.274911	0.00516852	0.451464
OSBPL2	-0.361681	89	0.000496679	0.209739	0.178886	0.0208636	-0.353778	0.000775199	0.245102	-0.278538	0.0123552	0.499766
ASB6	-0.360906	89	0.000511752	0.209739	0.178886	0.00587088	-0.388667	0.000258622	0.169517	-0.312342	0.00479281	0.451031
CEP164	-0.319188	114	0.000537297	0.209739	0.178886	0.0105573	-0.320603	0.000906492	0.249572	-0.290919	0.0030134	0.415116
FBXO36	-0.341814	98	0.000571612	0.209739	0.178886	0.00552974	-0.337403	0.000941875	0.249572	-0.310897	0.00302295	0.415116
LRRN1	-0.353595	90	0.000629092	0.220648	0.188191	0.019513	-0.359818	0.000834689	0.245102	-0.412963	0.000115391	0.145608
ZNF672	-0.383541	75	0.000682127	0.231433	0.197389	0.00760714	-0.388043	0.000826612	0.245102	-0.274942	0.0278955	0.593932
MFRP	-0.327436	104	0.00069162	0.231433	0.197389	0.00611409	-0.360684	0.000306215	0.169517	-0.307774	0.00268984	0.41393
ENTHD1	-0.315721	112	0.000696498	0.231433	0.197389	0.00656721	-0.338267	0.00044459	0.187034	-0.339519	0.00051386	0.317485
TMLHE	-0.383928	73	0.000798956	0.253584	0.216281	0.00803781	-0.392206	0.000940115	0.249572	-0.356059	0.00267607	0.41393
RCCD1	-0.37928	74	0.000860408	0.253584	0.216281	0.00818978	-0.411145	0.000605074	0.23803	-0.370327	0.00220831	0.410762
ZSCAN16	-0.389146	70	0.000870068	0.253584	0.216281	0.0104747	-0.395119	0.000936039	0.249572	-0.319682	0.0100239	0.484027
DDX31	-0.304796	116	0.000878724	0.253584	0.216281	0.00697796	-0.33358	0.000475232	0.195578	-0.26047	0.00757507	0.469175
ZP4	-0.318984	103	0.00102324	0.261306	0.222868	0.0110033	-0.343625	0.00069671	0.243731	-0.320478	0.0016379	0.408751
CA14	-0.320119	102	0.00103823	0.261306	0.222868	0.00923619	-0.32221	0.00163433	0.294849	-0.243447	0.020054	0.557005
NFATC2	-0.322955	100	0.00104831	0.261306	0.222868	0.0105429	-0.338662	0.000841565	0.245102	-0.356885	0.000515647	0.317485
PTPN11	-0.437382	53	0.00105692	0.261306	0.222868	0.0420684	-0.432448	0.00152873	0.289403	-0.357854	0.0115854	0.495009
PARD6B	-0.358962	80	0.00107613	0.261306	0.222868	0.0133889	-0.36809	0.00107007	0.272675	-0.435385	8.47032e-05	0.145608
BHLHE40	-0.348255	85	0.00109041	0.261422	0.222967	0.00648367	-0.347742	0.00168861	0.294849	-0.429365	9.75619e-05	0.145608
SETX	-0.298391	116	0.00114025	0.267752	0.228365	0.00583421	-0.309887	0.0011614	0.272675	-0.24775	0.0112226	0.488854
RNF207	-0.328	95	0.00117497	0.267752	0.228365	0.00774503	-0.317983	0.00253556	0.326093	-0.263766	0.0159782	0.531995
XCR1	-0.31073	106	0.0011875	0.267752	0.228365	0.00651966	-0.321484	0.0011084	0.272675	-0.206848	0.0431698	0.647159
ISG20L2	-0.33063	92	0.00128654	0.274878	0.234443	0.00767369	-0.319309	0.00272936	0.337709	-0.296012	0.00729387	0.46893
TEX36	-0.327174	94	0.00128772	0.274878	0.234443	0.00444908	-0.340679	0.00132879	0.272675	-0.340035	0.00145258	0.408751
WWC3	-0.311413	104	0.00129166	0.274878	0.234443	0.0146684	-0.337849	0.000867739	0.248896	-0.224628	0.0286358	0.599176
CCL22	-0.342304	85	0.00134308	0.276718	0.236013	0.008116	-0.344379	0.00164319	0.294849	-0.306177	0.00640627	0.46893
NRG4	-0.358772	77	0.00135485	0.276718	0.236013	0.0178749	-0.351751	0.0022759	0.312211	-0.293492	0.0136675	0.516686
OGG1	-0.316048	100	0.00135875	0.276718	0.236013	0.0126861	-0.319444	0.00202545	0.305698	-0.249369	0.0177774	0.547194
LOC283335	-0.367614	73	0.00137659	0.277368	0.236567	0.0150349	-0.388844	0.00136894	0.272675	-0.341882	0.00496045	0.451031
KIAA0430	-0.305757	106	0.00143592	0.281161	0.239802	0.00925868	-0.318691	0.00138275	0.272675	-0.287809	0.00468134	0.451031
CEP350	-0.293769	115	0.00143995	0.281161	0.239802	0.00453012	-0.309175	0.00126059	0.272675	-0.334095	0.000528078	0.317485
FOXD4L3	-0.32731	91	0.00154079	0.291152	0.248323	0.0137993	-0.336772	0.00185146	0.297033	-0.380831	0.000452574	0.317271
FAM186B	-0.293199	113	0.00162342	0.291152	0.248323	0.0058091	-0.305711	0.00168776	0.294849	-0.246747	0.0128645	0.504139
ADNP	-0.325796	91	0.00162497	0.291152	0.248323	0.0261472	-0.024592	0.823221	0.974457	-0.310293	0.00430561	0.451031
CCDC144A	-0.407151	57	0.00167103	0.291152	0.248323	0.0102214	-0.424484	0.00123799	0.272675	-0.325896	0.017247	0.537954
C4orf51	-0.311737	99	0.00168366	0.291152	0.248323	0.0128861	-0.314846	0.00211371	0.305698	-0.247057	0.0203106	0.558038
CCNB3	-0.305728	103	0.00168665	0.291152	0.248323	0.0074958	-0.303184	0.00313557	0.351475	-0.354552	0.000564348	0.317485
FOPNL	-0.314124	97	0.00172813	0.291152	0.248323	0.014719	-0.297781	0.00436536	0.36728	-0.354087	0.000713096	0.317485
ZNF407	-0.287662	116	0.00174143	0.291152	0.248323	0.0226189	-0.285725	0.00298778	0.34941	-0.188943	0.0547442	0.68592
CNDP1	-0.293764	111	0.00175221	0.291152	0.248323	0.0108081	-0.301354	0.00208461	0.305698	-0.196771	0.0497398	0.667062
ZNF217	-0.307616	101	0.00175244	0.291152	0.248323	0.0140674	-0.312181	0.00231623	0.315458	-0.181266	0.0873027	0.737334
ELF4	-0.316158	95	0.00180113	0.294081	0.250822	0.00688995	-0.300664	0.00419756	0.364514	-0.332564	0.0019961	0.408751
SLC26A11	-0.300374	104	0.00194781	0.307195	0.262006	0.00540738	-0.307349	0.00219657	0.310323	-0.295164	0.00350632	0.423809
MYBL2	-0.302374	102	0.00200942	0.307195	0.262006	0.00821597	-0.298504	0.00313608	0.351475	-0.270817	0.00902632	0.484027
CCDC168	-0.319061	91	0.00205228	0.307195	0.262006	0.0091478	-0.348479	0.0012445	0.272675	-0.215483	0.0564946	0.686643
C10orf12	-0.28932	111	0.00207131	0.307195	0.262006	0.00638521	-0.326363	0.000815018	0.245102	-0.284027	0.00418602	0.450877
MEF2A	-0.341263	79	0.0020852	0.307195	0.262006	0.0153085	-0.345067	0.00260468	0.330843	-0.450664	8.01949e-05	0.145608
ESCO2	-0.295604	106	0.00209513	0.307195	0.262006	0.00951522	-0.28094	0.00442965	0.36728	-0.28578	0.00499488	0.451031
PAPPA2	-0.288867	111	0.00210659	0.307195	0.262006	0.00778872	-0.313825	0.00131828	0.272675	-0.327892	0.000867628	0.326801
IL17RC	-0.290017	110	0.00211698	0.307195	0.262006	0.0104841	-0.279493	0.00444287	0.36728	-0.26827	0.00725827	0.46893
C10orf120	-0.311402	95	0.0021281	0.307195	0.262006	0.00560385	-0.324962	0.00226727	0.312211	-0.261592	0.0162335	0.53531
TACC2	-0.288323	111	0.0021497	0.307195	0.262006	0.0245	-0.294482	0.00279666	0.339381	-0.217708	0.0304113	0.601552
CTIF	-0.299587	102	0.00222094	0.308866	0.263431	0.00929539	-0.29921	0.00339441	0.351475	-0.344465	0.000722022	0.317485
MFSD11	-0.329179	84	0.00223217	0.308866	0.263431	0.0146304	-0.340772	0.00198055	0.305698	-0.344704	0.00245782	0.410762
CRIM1	-0.300375	101	0.00227348	0.308866	0.263431	0.0109758	-0.305544	0.00289872	0.34513	-0.29721	0.00401373	0.444552
LDLR	-0.286304	111	0.00231682	0.308866	0.263431	0.00795143	-0.291459	0.00268344	0.334212	-0.33999	0.000575163	0.317485
SPHAR	-0.337465	79	0.00235482	0.308866	0.263431	0.0093702	-0.354593	0.00193662	0.302993	-0.280939	0.0176336	0.544485
LPAR2	-0.31415	91	0.00242508	0.308866	0.263431	0.0124659	-0.299773	0.00531562	0.375603	-0.307838	0.00490103	0.451031
KDM6A	-0.349299	73	0.00245428	0.308866	0.263431	0.0218603	-0.322682	0.00727963	0.407557	-0.468793	8.19303e-05	0.145608
ANKRD20A4	-0.336024	79	0.00246504	0.308866	0.263431	0.00898729	-0.361094	0.00145877	0.278949	-0.317339	0.00700587	0.46893
C1orf194	-0.310137	93	0.00248329	0.308866	0.263431	0.0158979	-0.293366	0.00611867	0.39805	-0.332681	0.00198834	0.408751
CCDC144B	-0.500725	34	0.00256016	0.308866	0.263431	0.00516179	-0.541622	0.00136711	0.272675	-0.413597	0.0230915	0.570692
AMHR2	-0.296796	101	0.00257956	0.308866	0.263431	0.00885789	-0.286264	0.0056688	0.39024	-0.180575	0.0849754	0.733136
FBXO48	-0.315676	89	0.00258309	0.308866	0.263431	0.00621531	-0.31543	0.00389469	0.361701	-0.268597	0.0166906	0.537954
CENPN	-0.291075	105	0.00259159	0.308866	0.263431	0.0078504	-0.279337	0.00510961	0.375603	-0.339208	0.00088054	0.326801
KNOP1	-0.290912	105	0.00260664	0.308866	0.263431	0.00888724	-0.281909	0.00469998	0.367666	-0.300688	0.00323226	0.416192
C2orf81	-0.289537	106	0.00260921	0.308866	0.263431	0.00617209	-0.296359	0.00336962	0.351475	-0.315586	0.00194592	0.408751
NUP214	-0.279895	113	0.00267779	0.310837	0.265113	0.00656433	-0.300769	0.00182333	0.295022	-0.215882	0.0293171	0.600274
MPHOSPH9	-0.278472	114	0.00269909	0.310837	0.265113	0.00803853	-0.281443	0.00347128	0.351475	-0.211606	0.0327595	0.616049
SDCCAG8	-0.283003	110	0.00273777	0.310837	0.265113	0.00501623	-0.302117	0.00225131	0.312211	-0.251991	0.0118633	0.497891
RGS22	-0.283097	109	0.00285611	0.311976	0.266084	0.00700836	-0.278811	0.00496978	0.370405	-0.290954	0.00348148	0.423809
IGF1R	-0.312557	89	0.00286308	0.311976	0.266084	0.00849501	-0.298925	0.00574311	0.391089	-0.355446	0.00121421	0.370687
LRIT3	-0.281499	110	0.00289045	0.311976	0.266084	0.0136575	-0.315235	0.00140031	0.273292	-0.242423	0.0156221	0.531826
TICRR	-0.289261	104	0.00289965	0.311976	0.266084	0.012424	-0.297756	0.00321582	0.351475	-0.268102	0.00898621	0.484027
RNF213	-0.28004	111	0.00291263	0.311976	0.266084	0.00769785	-0.287932	0.00350295	0.351475	-0.254893	0.0100996	0.484027
2019-03-10	-0.277088	113	0.00296696	0.311976	0.266084	0.0077651	-0.312851	0.00122294	0.272675	-0.272194	0.00589325	0.46893
KMT2C	-0.27323	116	0.00300147	0.311976	0.266084	0.022029	-0.280021	0.00364672	0.351475	-0.19703	0.0449922	0.652077
TSHZ2	-0.283594	107	0.00307555	0.313324	0.267234	0.0137265	-0.287469	0.00391276	0.361701	-0.229385	0.0238136	0.576398
TET2	-0.277241	112	0.00308268	0.313324	0.267234	0.0152294	-0.281549	0.00414784	0.363532	-0.208937	0.036006	0.624205
BRWD1	-0.277971	111	0.00313783	0.313324	0.267234	0.0108951	-0.286257	0.00353739	0.351475	-0.13746	0.174849	0.809304
TAF1C	-0.279149	110	0.00314466	0.313324	0.267234	0.00495622	-0.298977	0.00251434	0.326093	-0.269052	0.00738666	0.469175
TMEM156	-0.285523	105	0.0031528	0.313324	0.267234	0.00753438	-0.304063	0.00246272	0.326093	-0.263232	0.00995669	0.484027
TET1	-0.273504	114	0.00323587	0.313603	0.267472	0.00496692	-0.290228	0.00254539	0.326093	-0.311027	0.001385	0.403313
MMP25	-0.291356	100	0.00327141	0.313603	0.267472	0.00793377	-0.302741	0.00335433	0.351475	-0.232055	0.027748	0.593405
ERRFI1	-0.306391	90	0.00331369	0.313603	0.267472	0.0245716	-0.306854	0.00428444	0.36728	-0.246047	0.0258656	0.591925
ANKRD20A3	-0.338745	73	0.00337344	0.313603	0.267472	0.0115007	-0.374385	0.0018014	0.295021	-0.364007	0.00266008	0.41393
GPR18	-0.299222	94	0.00339301	0.313603	0.267472	0.0153636	-0.311232	0.00299004	0.34941	-0.177358	0.104407	0.753807
PDZD2	-0.268558	117	0.00341487	0.313603	0.267472	0.00920111	-0.270803	0.00458702	0.36728	-0.258159	0.00783935	0.471058
RPRD2	-0.290023	100	0.00342304	0.313603	0.267472	0.0210802	-0.297862	0.00354857	0.351475	-0.253711	0.0152393	0.52987
KIAA1614	-0.281074	106	0.00351603	0.318629	0.271759	0.0075003	-0.291466	0.00342194	0.351475	-0.200487	0.052683	0.680671
AK308309	-0.312765	85	0.00356427	0.31994	0.272877	0.0118871	-0.313486	0.00413302	0.363532	-0.227487	0.0437749	0.647159
F8	-0.269137	115	0.00363154	0.32444	0.276715	0.0121455	-0.307534	0.00141648	0.273627	-0.219046	0.026215	0.591925
SIVA1	-0.304358	89	0.00373339	0.328886	0.280506	0.0144711	-0.295657	0.00632443	0.402141	-0.208342	0.0636612	0.694934
KLB	-0.272667	111	0.00378825	0.330593	0.281963	0.00775845	-0.282664	0.00418295	0.364514	-0.300461	0.00238677	0.410762
VWA3A	-0.267817	115	0.00380728	0.330593	0.281963	0.00621256	-0.275291	0.00447949	0.36728	-0.209929	0.0324452	0.614956
FAM150A	-0.348617	67	0.00383839	0.330593	0.281963	0.0247937	-0.309432	0.0143942	0.479322	-0.258746	0.0519621	0.675971
CDC42BPB	-0.283812	102	0.00384352	0.330593	0.281963	0.0137687	-0.298464	0.00330517	0.351475	-0.234792	0.024269	0.580004
ARHGAP6	-0.272119	111	0.00386194	0.330593	0.281963	0.0091297	-0.291955	0.00305238	0.350209	-0.270561	0.00675734	0.46893
CYTL1	-0.304873	88	0.00387496	0.330593	0.281963	0.00910654	-0.335768	0.00204317	0.305698	-0.302117	0.0064566	0.46893
HELLS	-0.284498	101	0.00393386	0.331144	0.282432	0.00618084	-0.296438	0.00371826	0.35298	-0.292778	0.00485791	0.451031
CASP10	-0.295629	93	0.00401501	0.334768	0.285523	0.00472798	-0.304211	0.00490259	0.369764	-0.238381	0.0299914	0.600909
TMEM31	-0.29241	95	0.00403438	0.334768	0.285523	0.00881262	-0.309476	0.00316616	0.351475	-0.277335	0.00930547	0.484027
MBNL3	-0.293697	94	0.00406529	0.334768	0.285523	0.0106729	-0.306764	0.00327379	0.351475	-0.305644	0.00469438	0.451031
ASB9	-0.278646	104	0.00417986	0.337227	0.287621	0.00569228	-0.278	0.00609858	0.39805	-0.320803	0.00171755	0.408751
PDZD9	-0.295687	92	0.00421458	0.337227	0.287621	0.0115871	-0.317677	0.00305032	0.350209	-0.262793	0.0163861	0.537531
OFCC1	-0.270665	110	0.0042376	0.337227	0.287621	0.00895322	-0.279275	0.00468031	0.367666	-0.200501	0.046604	0.659239
ZNF829	-0.323897	76	0.00431391	0.341697	0.291433	0.0203559	-0.249547	0.0401448	0.577995	-0.254889	0.0404532	0.642474
IL18	-0.285726	98	0.00434503	0.341697	0.291433	0.00461286	-0.259151	0.0131196	0.468031	-0.248608	0.0209924	0.558038
CLCA4	-0.264047	115	0.00435213	0.341697	0.291433	0.0060955	-0.269462	0.00544055	0.380056	-0.18938	0.0553762	0.686643
UBA5	-0.289947	95	0.00437009	0.341697	0.291433	0.004243	-0.285875	0.00727124	0.407557	-0.294469	0.00654827	0.46893
MLANA	-0.294195	92	0.00441997	0.341697	0.291433	0.0124969	-0.302218	0.00399633	0.363532	-0.29366	0.00704985	0.46893
FANCI	-0.271641	108	0.00445788	0.341697	0.291433	0.0129355	-0.283912	0.00365752	0.351475	-0.205692	0.0411004	0.642811
GLTPD1	-0.29064	94	0.00448628	0.341697	0.291433	0.00869427	-0.277417	0.00928393	0.434046	-0.254883	0.0185657	0.554276
ALS2CR11	-0.265447	113	0.00448977	0.341697	0.291433	0.00812996	-0.267909	0.00621915	0.400458	-0.23044	0.0204299	0.558038
DCXR	-0.310636	82	0.00450612	0.341697	0.291433	0.0163397	-0.305821	0.00647118	0.406459	-0.221129	0.0565802	0.686643
PP2D1	-0.264136	114	0.0045151	0.341697	0.291433	0.0106396	-0.273039	0.0048312	0.368422	-0.236873	0.0165283	0.537923
ZNF532	-0.278953	102	0.00452334	0.341697	0.291433	0.0111865	-0.285132	0.00486532	0.368422	-0.281025	0.00635904	0.46893
TCEA2	-0.319082	77	0.00467702	0.346676	0.295679	0.019431	-0.31065	0.00706399	0.407557	-0.3561	0.00230468	0.410762
SCLT1	-0.280417	100	0.00471565	0.346676	0.295679	0.00920258	-0.325979	0.00171624	0.294849	-0.239288	0.023119	0.570692
ACD	-0.266477	110	0.00489328	0.355085	0.302851	0.00598096	-0.291562	0.00324841	0.351475	-0.261073	0.00941713	0.484027
PPAP2A	-0.298954	87	0.00491194	0.355085	0.302851	0.00867717	-0.285643	0.00844233	0.418381	-0.306785	0.00596042	0.46893
ST7L	-0.273963	103	0.00510595	0.359655	0.306749	0.0114196	-0.280756	0.00585291	0.392913	-0.347972	0.000588984	0.317485
MROH8	-0.272147	104	0.00519352	0.364316	0.310725	0.00920921	-0.265262	0.00829702	0.418094	-0.372681	0.000253715	0.228682
COMMD4	-0.330342	70	0.00522306	0.365036	0.311339	0.00929428	-0.332243	0.00642094	0.406459	-0.345906	0.00548897	0.463691
EDEM1	-0.312548	78	0.00533726	0.369215	0.314903	0.0120456	-0.281415	0.0174341	0.49009	-0.354842	0.00206759	0.408751
HEATR4	-0.258608	114	0.00546651	0.370295	0.315824	0.0074868	-0.24726	0.0106089	0.442603	-0.276285	0.0049405	0.451031
C2orf53	-0.273047	102	0.00549279	0.370295	0.315824	0.00713396	-0.29464	0.0039428	0.362336	-0.234943	0.0233967	0.571673
ZNF202	-0.265264	108	0.00552839	0.370899	0.316339	0.00857929	-0.27815	0.00530935	0.375603	-0.324136	0.00119991	0.370687
TSPY26P	-0.307293	80	0.00555961	0.370899	0.316339	0.0152686	-0.313733	0.00771573	0.411594	-0.21425	0.0770998	0.717422
CAPRIN2	-0.26995	104	0.00558276	0.370899	0.316339	0.00747061	-0.287126	0.00456276	0.36728	-0.231224	0.0265788	0.591925
SYNM	-0.263924	108	0.00578057	0.373282	0.318372	0.0144219	-0.275116	0.00585135	0.392913	-0.254083	0.0124889	0.500376
ANGPT2	-0.288615	90	0.00580253	0.373282	0.318372	0.0141337	-0.293769	0.00668359	0.407557	-0.305131	0.00476799	0.451031
ADAM19	-0.262547	109	0.00581516	0.373282	0.318372	0.0110032	-0.280129	0.00476031	0.367768	-0.21357	0.0347263	0.624205
TMEM249	-0.292994	87	0.0058862	0.373282	0.318372	0.00744419	-0.293823	0.00737882	0.407557	-0.291043	0.00973379	0.484027
SLC16A1	-0.269585	103	0.00589113	0.373282	0.318372	0.00906919	-0.262051	0.00990392	0.436424	-0.198734	0.0535227	0.683133
SPATA31D1	-0.366698	55	0.0058929	0.373282	0.318372	0.00720602	-0.384432	0.00763153	0.40927	-0.334097	0.0217236	0.563695
CCDC30	-0.260859	110	0.00591454	0.373404	0.318476	0.0101586	-0.28721	0.00342407	0.351475	-0.235024	0.0198328	0.556891
IKBKG	-0.275973	98	0.00594915	0.374342	0.319276	0.0158248	-0.274886	0.00836414	0.418381	-0.168067	0.115408	0.760736
TNFSF15	-0.267458	104	0.00605519	0.375141	0.319958	0.00908553	-0.27192	0.00736097	0.407557	-0.273584	0.00730415	0.46893
ANKRD26P1	-0.304038	80	0.00610981	0.375141	0.319958	0.00572818	-0.335335	0.00373007	0.35298	-0.319411	0.00624007	0.46893
COIL	-0.26211	108	0.00613815	0.375141	0.319958	0.00825731	-0.27459	0.0056969	0.390754	-0.297596	0.00292049	0.415116
ZBTB40	-0.252863	116	0.00617046	0.375141	0.319958	0.00942192	-0.243535	0.0114801	0.450893	-0.268245	0.00590227	0.46893
TMEM176B	-0.285006	91	0.00617702	0.375141	0.319958	0.00666018	-0.247036	0.0252562	0.529794	-0.253504	0.020755	0.558038
ANKRD62	-0.30348	80	0.00620878	0.375141	0.319958	0.00583677	-0.331069	0.00450245	0.36728	-0.329814	0.00466623	0.451031
ZNF404	-0.338526	64	0.00621683	0.375141	0.319958	0.00955196	-0.320844	0.0140657	0.479322	-0.306667	0.0181579	0.549909
LENEP	-0.317198	73	0.00625006	0.375141	0.319958	0.0183425	-0.317074	0.00748514	0.407557	-0.267381	0.0299772	0.600909
ADCY7	-0.260183	109	0.00628932	0.375141	0.319958	0.0220779	-0.270543	0.00621341	0.400458	-0.114876	0.260015	0.855201
EDN1	-0.267462	103	0.00630915	0.375141	0.319958	0.0106198	-0.295879	0.00360068	0.351475	-0.226066	0.0293383	0.600274
LOC283440	-0.400934	45	0.00634475	0.37551	0.320273	0.0086339	-0.408868	0.00648411	0.406459	-0.38487	0.0170343	0.537954
SPATA4	-0.269791	101	0.00636425	0.37551	0.320273	0.0113464	-0.290518	0.00450396	0.36728	-0.270412	0.00953099	0.484027
SLC19A3	-0.253694	114	0.00645821	0.379871	0.323992	0.0107744	-0.247236	0.0106169	0.442603	-0.228059	0.0205081	0.558038
C6orf120	-0.300038	81	0.00650106	0.381207	0.325131	0.0212297	-0.310803	0.00628286	0.402141	-0.272701	0.0171576	0.537954
SH2B3	-0.307378	77	0.00654238	0.382416	0.326162	0.0185271	-0.281218	0.0183599	0.490266	-0.267872	0.0249636	0.584068
C1GALT1C1	-0.289354	87	0.00656204	0.382416	0.326162	0.0160671	-0.300596	0.00674329	0.407557	-0.257314	0.0220622	0.565078
DCLRE1A	-0.256327	111	0.00661706	0.383347	0.326956	0.00697436	-0.264165	0.00729901	0.407557	-0.245153	0.0139577	0.521066
CLHC1	-0.259815	108	0.00661851	0.383347	0.326956	0.00709697	-0.259939	0.00974234	0.436424	-0.257145	0.0110011	0.488854
IRF1	-0.290357	86	0.00668896	0.383991	0.327505	0.0118042	-0.304339	0.00573905	0.391089	-0.334354	0.0027727	0.415116
TNFSF14	-0.280622	92	0.00673837	0.383991	0.327505	0.0157823	-0.302531	0.00515699	0.375603	-0.157255	0.155669	0.79713
LAX1	-0.256866	110	0.00675126	0.383991	0.327505	0.0120472	-0.26302	0.00787515	0.411594	-0.222296	0.027808	0.593405
PGS1	-0.271755	98	0.0067923	0.385168	0.32851	0.0107591	-0.282341	0.00610677	0.39805	-0.173707	0.105545	0.753807
CCRL1	-0.271437	98	0.00685988	0.387839	0.330788	0.0186	-0.287858	0.00514303	0.375603	-0.223196	0.0355133	0.624205
TNFRSF11A	-0.259107	107	0.00704026	0.389426	0.332141	0.00880621	-0.273337	0.00674973	0.407557	-0.28097	0.00581385	0.46893
ADAM12	-0.252208	113	0.00704075	0.389426	0.332141	0.010204	-0.244828	0.0122507	0.459245	-0.21632	0.0289826	0.599543
C16orf97	-0.362596	54	0.00704844	0.389426	0.332141	0.0103636	-0.358431	0.0105905	0.442603	-0.383328	0.00715905	0.46893
BORA	-0.258963	107	0.00707315	0.389426	0.332141	0.00821005	-0.272582	0.00607498	0.39805	-0.272792	0.00716673	0.46893
ENTPD7	-0.27601	94	0.00708694	0.389426	0.332141	0.0190523	-0.131629	0.221533	0.788512	-0.207534	0.0566708	0.686643
ADAMTS4	-0.257623	108	0.00710798	0.389426	0.332141	0.00899044	-0.24631	0.01303	0.46718	-0.246676	0.0148612	0.52285
IGFBP6	-0.278828	92	0.00711412	0.389426	0.332141	0.00820179	-0.291135	0.00653722	0.407093	-0.219392	0.0476612	0.659239
FSIP2	-0.247995	116	0.00727202	0.39378	0.335855	0.00909659	-0.260065	0.00709648	0.407557	-0.251492	0.0100164	0.484027
CPSF2	-0.375038	50	0.00728407	0.39378	0.335855	0.0248683	-0.373425	0.00972645	0.436424	-0.439248	0.00321021	0.416184
RPA4	-0.292459	83	0.00729761	0.39378	0.335855	0.0146461	-0.278696	0.0141126	0.479322	-0.326385	0.00426577	0.451031
ZNF275	-0.261255	104	0.0073891	0.394503	0.336472	0.0205902	-0.266001	0.00811208	0.412633	-0.233421	0.0228143	0.570692
RABEPK	-0.262421	103	0.00740897	0.394503	0.336472	0.00921356	-0.286627	0.00463684	0.36728	-0.228033	0.0262472	0.591925
CASC5	-0.249199	114	0.00750165	0.396055	0.337795	0.00768017	-0.269351	0.00523741	0.375603	-0.208775	0.0352216	0.624205
ZCCHC8	-0.268518	98	0.00750934	0.396055	0.337795	0.00789273	-0.276216	0.00736085	0.407557	-0.217681	0.0404419	0.642474
CDK4	-0.359524	54	0.00758384	0.397889	0.339359	0.014231	-0.354985	0.00910054	0.431785	-0.385085	0.00687738	0.46893
GDPGP1	-0.252867	110	0.00769284	0.401762	0.342663	0.00690937	-0.281047	0.00403128	0.363532	-0.227113	0.0230648	0.570692
TNFRSF9	-0.266109	99	0.00776057	0.401762	0.342663	0.00780871	-0.278695	0.00781648	0.411594	-0.219591	0.0398158	0.639273
FBXW9	-0.277302	91	0.00778791	0.401762	0.342663	0.00608405	-0.256468	0.0200288	0.501542	-0.301429	0.00561906	0.464444
CAMTA1	-0.265969	99	0.00779423	0.401762	0.342663	0.0142135	-0.26174	0.0108248	0.442603	-0.176923	0.0971962	0.74795
EXOC4	-0.263303	101	0.00780615	0.401762	0.342663	0.0118175	-0.260448	0.0121621	0.458744	-0.225802	0.0304459	0.601552
PTPN22	-0.246275	115	0.0079746	0.409319	0.349108	0.00944896	-0.257006	0.00813016	0.412633	-0.161122	0.103973	0.753734
LRP11	-0.331135	63	0.00802743	0.410918	0.350471	0.0085031	-0.269573	0.0445195	0.589881	-0.201647	0.12564	0.774337
LOC643037	-0.305815	74	0.00805534	0.411235	0.350742	0.0054813	-0.319769	0.00739759	0.407557	-0.308108	0.0105843	0.484882
CD248	-0.253633	108	0.00808216	0.411495	0.350964	0.0122929	-0.247554	0.0139869	0.479322	-0.212026	0.0380935	0.631493
ARL6IP1	-0.344299	58	0.0081336	0.412088	0.351469	0.0150696	-0.357624	0.00793249	0.411594	-0.291832	0.0322587	0.614956
USP27X-AS1	-0.274058	92	0.00820413	0.412088	0.351469	0.00807081	-0.242593	0.0235768	0.526334	-0.244644	0.0267522	0.591925
DRC1	-0.24755	113	0.00820511	0.412088	0.351469	0.00641205	-0.256151	0.00867486	0.424302	-0.283741	0.00403505	0.444552
ST6GALNAC2	-0.253004	108	0.0082461	0.412088	0.351469	0.00513451	-0.247896	0.0124383	0.460307	-0.283257	0.0051659	0.451464
BBS2	-0.266721	97	0.00826954	0.412172	0.351541	0.00750007	-0.254729	0.0148217	0.479322	-0.302352	0.00466335	0.451031
SETD6	-0.252604	108	0.00835182	0.412223	0.351585	0.0049719	-0.264093	0.00792997	0.411594	-0.226275	0.0258372	0.591925
CCDC160	-0.253661	107	0.00838058	0.412223	0.351585	0.00515218	-0.275957	0.00595209	0.397851	-0.285424	0.00459901	0.451031
HSBP1L1	-0.343042	58	0.00838465	0.412223	0.351585	0.0241544	-0.301056	0.0255158	0.529794	-0.317269	0.0206218	0.558038
BCL2L15	-0.260935	101	0.00840024	0.412223	0.351585	0.0119874	-0.243901	0.0172251	0.488887	-0.170223	0.102828	0.751699
FAM122B	-0.280817	87	0.00842271	0.412223	0.351585	0.00905541	-0.284863	0.00904942	0.431124	-0.356071	0.00118856	0.370687
IL21	-0.285673	84	0.00843494	0.412223	0.351585	0.00662142	-0.287784	0.0101182	0.44034	-0.217855	0.0569969	0.687068
ELP6	-0.25809	103	0.0084857	0.412223	0.351585	0.00835481	-0.272807	0.0071634	0.407557	-0.280297	0.00650234	0.46893
C5orf47	-0.35148	55	0.00850555	0.412223	0.351585	0.0109455	-0.265742	0.0679165	0.645343	-0.34427	0.0154256	0.531131
ZFAT	-0.247497	112	0.0085149	0.412223	0.351585	0.0180135	-0.244702	0.0122971	0.460073	-0.196447	0.0489616	0.663549
VAV2	-0.278823	88	0.00852385	0.412223	0.351585	0.0134076	-0.262842	0.0170464	0.486735	-0.19304	0.0882871	0.738904
TLR10	-0.249654	110	0.00853176	0.412223	0.351585	0.00987406	-0.248476	0.012228	0.459245	-0.160159	0.113294	0.758895
CCDC181	-0.255066	105	0.00864079	0.412499	0.35182	0.0122596	-0.28814	0.00463181	0.36728	-0.248867	0.0155736	0.531131
CGB	-0.291508	80	0.00870215	0.414118	0.353201	0.00913251	-0.308429	0.00793576	0.411594	-0.326052	0.00458306	0.451031
RIOK1	-0.263497	98	0.00875391	0.415038	0.353985	0.0122601	-0.257731	0.0141886	0.479322	-0.232174	0.0267917	0.591925
TMX3	-0.257044	103	0.00876531	0.415038	0.353985	0.0314436	-0.263023	0.00888017	0.428854	-0.279846	0.00602171	0.46893
NOBOX	-0.253229	106	0.0088168	0.415098	0.354036	0.0219611	-0.271797	0.00738872	0.407557	-0.168432	0.100918	0.749452
AK123872	-0.267261	95	0.00883782	0.415098	0.354036	0.0206192	-0.261453	0.0150328	0.479322	-0.230531	0.0337873	0.619574
XKR9	-0.259265	101	0.00884266	0.415098	0.354036	0.00976162	-0.270431	0.00838508	0.418381	-0.168238	0.10892	0.756688
ZBTB49	-0.253015	106	0.00887616	0.415098	0.354036	0.012244	-0.253184	0.0123438	0.460307	-0.230432	0.0239033	0.577462
DHX32	-0.251605	107	0.00894244	0.416047	0.354846	0.0121052	-0.267475	0.00743959	0.407557	-0.199753	0.0510281	0.674012
BC037497	-0.278629	87	0.00896825	0.416047	0.354846	0.0204265	-0.272568	0.0132336	0.470022	-0.243782	0.0326361	0.615888
TIGD6	-0.281572	85	0.00903906	0.416047	0.354846	0.0111845	-0.281764	0.0118813	0.454466	-0.319649	0.00460006	0.451031
AURKC	-0.293578	78	0.00908861	0.416047	0.354846	0.0132291	-0.325942	0.00520535	0.375603	-0.219367	0.0701353	0.704255
WNT8A	-0.260867	99	0.00910868	0.416047	0.354846	0.0061819	-0.269621	0.00859003	0.422384	-0.296263	0.00481718	0.451031
ANKRD18B	-0.291649	79	0.00911074	0.416047	0.354846	0.00747531	-0.312002	0.00680659	0.407557	-0.299518	0.00952814	0.484027
DEFB105A	-0.316305	67	0.00911612	0.416047	0.354846	0.0124407	-0.341546	0.00706201	0.407557	-0.201318	0.113614	0.758895
MMP12	-0.252498	105	0.0093602	0.421188	0.359231	0.00582168	-0.256367	0.0104257	0.442603	-0.193445	0.0631867	0.694934
HIF3A	-0.256143	102	0.0093623	0.421188	0.359231	0.00797869	-0.28861	0.00456251	0.36728	-0.2312	0.0274551	0.591925
HPCAL1	-0.687719	13	0.00937757	0.421188	0.359231	0.0104669	-0.692079	0.00876171	0.425303	-0.301207	0.368065	0.892256
LIMCH1	-0.241275	115	0.00938749	0.421188	0.359231	0.00538423	-0.244917	0.0117993	0.454466	-0.210984	0.0324139	0.614956
ZNF213	-0.255988	102	0.00940669	0.421188	0.359231	0.0102528	-0.269336	0.00903607	0.431124	-0.166815	0.116076	0.760841
POTEB	-0.350013	54	0.00947253	0.423136	0.360892	0.0102994	-0.395094	0.00496083	0.370405	-0.333613	0.0204911	0.558038
PLEKHG2	-0.250567	106	0.00958024	0.425938	0.363282	0.0116236	-0.262143	0.00949016	0.436424	-0.226998	0.0269543	0.591925
PRKCZ	-0.291508	78	0.00961249	0.426	0.363335	0.0168148	-0.30672	0.00704116	0.407557	-0.258001	0.0286635	0.599176
AIRE	-0.264307	95	0.00964664	0.426	0.363335	0.00640504	-0.25595	0.0148949	0.479322	-0.253078	0.0194446	0.555365
RBM34	-0.253923	103	0.0096491	0.426	0.363335	0.00883325	-0.26421	0.00928979	0.434046	-0.24104	0.0199386	0.556891
C2orf70	-0.264072	95	0.00971366	0.427835	0.3649	0.0100242	-0.264004	0.0124221	0.460307	-0.314903	0.0031462	0.415116
CDC25B	-0.25076	105	0.00987632	0.427966	0.365012	0.00708464	-0.262559	0.0093732	0.434912	-0.210459	0.0417466	0.644609
LRRC28	-0.284941	81	0.00992898	0.427966	0.365012	0.0170605	-0.345767	0.00254935	0.326093	-0.302109	0.0093858	0.484027
WSB1	-0.279763	84	0.00995659	0.427966	0.365012	0.0120338	-0.268323	0.0183015	0.490266	-0.344987	0.00227345	0.410762
ZAR1	-0.341534	56	0.00999126	0.427966	0.365012	0.0172868	-0.340024	0.0193628	0.496113	-0.347149	0.0116879	0.496027
RNF41	-0.51492	24	0.0100308	0.427966	0.365012	0.0643134	-0.475323	0.0189051	0.492659	-0.567398	0.00588592	0.46893
FAM104B	-0.41784	37	0.0100731	0.427966	0.365012	0.017391	-0.433113	0.0118119	0.454466	-0.428205	0.00917674	0.484027
HAUS6	-0.243288	111	0.0100831	0.427966	0.365012	0.00974252	-0.252655	0.0108019	0.442603	-0.239104	0.017148	0.537954
GALNTL5	-0.252314	103	0.0101348	0.427966	0.365012	0.0180125	-0.26153	0.0113339	0.449816	-0.254497	0.0143603	0.521203
ALPK1	-0.241915	112	0.0101771	0.427966	0.365012	0.00548188	-0.254613	0.00980908	0.436424	-0.265383	0.00761929	0.469175
C5orf42	-0.237696	116	0.0101913	0.427966	0.365012	0.0106145	-0.25504	0.00802154	0.412633	-0.242303	0.0127608	0.504139
LBX2	-0.283912	81	0.0102115	0.427966	0.365012	0.00921943	-0.294994	0.0107265	0.442603	-0.191252	0.105049	0.753807
C22orf46	-0.243865	110	0.0102482	0.427966	0.365012	0.0106503	-0.248689	0.0125973	0.46217	-0.21269	0.0345487	0.623986
WDR33	-0.298737	73	0.0102504	0.427966	0.365012	0.010654	-0.307375	0.00964314	0.436424	-0.300408	0.0150396	0.526219
TSC1	-0.24276	111	0.0102523	0.427966	0.365012	0.00926638	-0.268699	0.00658896	0.407557	-0.141215	0.161086	0.801396
RAD51AP2	-0.249524	105	0.0102585	0.427966	0.365012	0.00912771	-0.256748	0.0115655	0.452371	-0.180554	0.0832883	0.730309
SCN2B	-0.300285	72	0.0103816	0.428046	0.36508	0.0155634	-0.0932274	0.449548	0.8896	-0.31708	0.010066	0.484027
AX747140	-0.275028	86	0.0103829	0.428046	0.36508	0.0064455	-0.265598	0.018763	0.49197	-0.205185	0.0696767	0.702991
OFD1	-0.240166	113	0.0104004	0.428046	0.36508	0.0108921	-0.253055	0.00954739	0.436424	-0.222544	0.024566	0.580761
ZP2	-0.239958	113	0.0104688	0.428046	0.36508	0.0106122	-0.244503	0.0123702	0.460307	-0.141054	0.159435	0.799668
AB209621	-0.32005	63	0.010555	0.428046	0.36508	0.00470422	-0.328705	0.0103394	0.442603	-0.270686	0.0456259	0.653752
YAP1	-0.303643	70	0.0106079	0.428046	0.36508	0.0220907	-0.288128	0.0199396	0.501154	-0.173059	0.168017	0.805909
WDPCP	-0.243857	109	0.0106099	0.428046	0.36508	0.00703378	-0.252278	0.0105276	0.442603	-0.258058	0.0103035	0.484027
IFT43	-0.262299	94	0.0106511	0.428046	0.36508	0.0114361	-0.285445	0.00736332	0.407557	-0.302423	0.00490639	0.451031
DNAH3	-0.235127	117	0.010715	0.428046	0.36508	0.00704707	-0.24885	0.00974693	0.436424	-0.207174	0.0339593	0.621045
ZNF204P	-0.324504	61	0.0107266	0.428046	0.36508	0.0132634	-0.323503	0.0159863	0.484251	-0.292187	0.0337538	0.619574
MOV10	-0.257854	97	0.0107749	0.428046	0.36508	0.0146177	-0.254781	0.0153754	0.48339	-0.218475	0.0420568	0.645622
TSGA13	-0.251091	102	0.0109102	0.428046	0.36508	0.00773109	-0.243724	0.0167147	0.485802	-0.215013	0.0384763	0.631493
STPG2	-0.24182	110	0.0109231	0.428046	0.36508	0.00357369	-0.225754	0.0239207	0.528629	-0.286643	0.00421625	0.450877
PEX11A	-0.265651	91	0.010927	0.428046	0.36508	0.0115353	-0.234859	0.0295057	0.542811	-0.306416	0.00458547	0.451031
KCNK9	-0.292271	75	0.0109451	0.428046	0.36508	0.0100492	-0.292395	0.0133471	0.47053	-0.246836	0.0379693	0.631493
SV2B	-0.274551	85	0.0109961	0.428046	0.36508	0.0119355	-0.277467	0.0139147	0.479322	-0.154253	0.183375	0.8164
C9orf116	-0.286438	78	0.0110087	0.428046	0.36508	0.0133468	-0.305506	0.00857984	0.422384	-0.269258	0.0212477	0.558516
CHRNB4	-0.250591	102	0.011075	0.428046	0.36508	0.011803	-0.247461	0.0156166	0.484251	-0.188015	0.0726914	0.709315
FUT9	-0.343005	54	0.0111129	0.428046	0.36508	0.0248987	-0.348944	0.0120862	0.458526	-0.336619	0.0193138	0.555365
GPR64	-0.238051	113	0.0111171	0.428046	0.36508	0.00578532	-0.271247	0.00535	0.376509	-0.204908	0.0398275	0.639273
SMCO2	-0.272544	86	0.0111253	0.428046	0.36508	0.00396993	-0.28326	0.00991737	0.436424	-0.305515	0.0081207	0.477312
UTS2B	-0.277215	83	0.011175	0.428046	0.36508	0.00558884	-0.302082	0.00799893	0.41261	-0.25203	0.0270216	0.591925
DKC1	-0.261837	93	0.0112349	0.428046	0.36508	0.00971853	-0.276128	0.00921132	0.433931	-0.234845	0.032592	0.615671
KIF20B	-0.238746	112	0.0112423	0.428046	0.36508	0.00875349	-0.2572	0.00906384	0.431124	-0.228271	0.0223562	0.568524
PGD	-0.270557	87	0.0112594	0.428046	0.36508	0.012855	-0.253793	0.0214073	0.511608	-0.231065	0.0431898	0.647159
NLRP2	-0.317098	63	0.0113348	0.428046	0.36508	0.0115683	-0.352439	0.00717152	0.407557	-0.315866	0.0166868	0.537954
CXorf58	-0.252138	100	0.0113833	0.428046	0.36508	0.0076553	-0.250667	0.0159501	0.484251	-0.206282	0.0524444	0.678515
FAM205A	-0.249642	102	0.0113937	0.428046	0.36508	0.0103923	-0.260239	0.0104464	0.442603	-0.249429	0.016496	0.537923
PTPN21	-0.244525	106	0.0115315	0.428046	0.36508	0.0102423	-0.256596	0.0107588	0.442603	-0.214516	0.0378739	0.631493
DCAF8L2	-0.247948	103	0.0115617	0.428046	0.36508	0.0117296	-0.259494	0.010677	0.442603	-0.243452	0.0200512	0.557005
RPTOR	-0.272688	85	0.0115736	0.428046	0.36508	0.0127874	-0.254758	0.0243907	0.529689	-0.285944	0.0106311	0.484882
TTC7B	-0.277577	82	0.0115764	0.428046	0.36508	0.0110659	-0.258482	0.0232202	0.526334	-0.309081	0.00779781	0.470691
ZNF839	-0.246681	104	0.0115896	0.428046	0.36508	0.0106358	-0.280872	0.00610381	0.39805	-0.208324	0.043913	0.647159
FAM122C	-0.252509	99	0.0116845	0.428046	0.36508	0.00905121	-0.275036	0.00762713	0.40927	-0.245774	0.018861	0.555365
SCRT1	-0.357422	49	0.0116936	0.428046	0.36508	0.0228639	-0.364512	0.0149893	0.479322	-0.228655	0.130841	0.778275
SUPT6H	-0.334529	56	0.0117359	0.428046	0.36508	0.0203746	-0.323977	0.0168541	0.48638	-0.241777	0.0842007	0.73031
SPOCD1	-0.239401	110	0.0117716	0.428046	0.36508	0.00365056	-0.257098	0.0098169	0.436424	-0.183458	0.0705723	0.705595
ADAR	-0.243823	106	0.0117797	0.428046	0.36508	0.00827375	-0.269595	0.00726357	0.407557	-0.276444	0.00699393	0.46893
ZSCAN12	-0.289327	75	0.0118139	0.428046	0.36508	0.00580493	-0.289846	0.0173521	0.489652	-0.270635	0.0267553	0.591925
XCL1	-0.257322	95	0.0118221	0.428046	0.36508	0.0115782	-0.253552	0.0171439	0.488015	-0.11802	0.287953	0.868448
CEP89	-0.2339	115	0.011873	0.428046	0.36508	0.00881501	-0.233553	0.0164929	0.484899	-0.254436	0.00949891	0.484027
ITPR1	-0.278175	81	0.01192	0.428046	0.36508	0.0168749	-0.267015	0.0181168	0.490266	-0.302828	0.00827024	0.477312
DUSP9	-0.2834	78	0.0119274	0.428046	0.36508	0.00920292	-0.282638	0.0154013	0.48339	-0.267411	0.0252233	0.585191
GJC3	-0.26659	88	0.0120495	0.429788	0.366566	0.0135138	-0.260572	0.0180616	0.490266	-0.25946	0.0193327	0.555365
SCAF8	-0.253822	97	0.0121182	0.431026	0.367622	0.0137681	-0.273543	0.00870042	0.424302	-0.239721	0.0244784	0.580761
C9orf96	-0.247536	102	0.0121297	0.431026	0.367622	0.00923947	-0.247024	0.015807	0.484251	-0.19115	0.0711154	0.706344
CYLC1	-0.257594	94	0.0121933	0.431666	0.368167	0.00784338	-0.277233	0.0102087	0.442603	-0.204837	0.0585042	0.690984
TIAM2	-0.232602	115	0.0123654	0.433618	0.369833	0.0109013	-0.223962	0.0210054	0.508305	-0.231936	0.0178313	0.547619
BOD1L1	-0.233529	114	0.012398	0.433618	0.369833	0.0181343	-0.237626	0.0141773	0.479322	-0.19502	0.0483722	0.660619
IKZF5	-0.308486	65	0.0124145	0.433618	0.369833	0.0196076	-0.303208	0.0148716	0.479322	-0.306137	0.018369	0.551887
WDR93	-0.238718	109	0.0124259	0.433618	0.369833	0.00669299	-0.250998	0.0122127	0.459245	-0.211626	0.0354842	0.624205
GRPR	-0.271667	84	0.0124274	0.433618	0.369833	0.00938671	-0.254673	0.0235135	0.526334	-0.262999	0.0217136	0.563695
PCDHB15	-0.246642	102	0.0124545	0.433618	0.369833	0.00918183	-0.26039	0.0108188	0.442603	-0.162627	0.123515	0.769801
VILL	-0.239458	108	0.0125607	0.436268	0.372093	0.00696639	-0.260455	0.00959325	0.436424	-0.23654	0.0184127	0.552322
NOXRED1	-0.239325	108	0.0126113	0.436268	0.372093	0.010279	-0.254051	0.0107549	0.442603	-0.204415	0.0445989	0.648461
ZNF638	-0.233994	113	0.0126148	0.436268	0.372093	0.0115404	-0.263851	0.00653466	0.407093	-0.238429	0.0158108	0.531995
SLC25A33	-0.281202	78	0.0126329	0.436268	0.372093	0.011858	-0.280933	0.0139616	0.479322	-0.309195	0.0102992	0.484027
VPS33A	-0.27253	83	0.0126818	0.436268	0.372093	0.0174442	-0.269725	0.0169345	0.486605	-0.162738	0.160144	0.801396
TNFSF8	-0.250904	98	0.0127041	0.436268	0.372093	0.00613228	-0.251279	0.0151157	0.479322	-0.173668	0.103608	0.752653
ESM1	-0.263162	89	0.0127149	0.436268	0.372093	0.00525224	-0.247643	0.0215118	0.511608	-0.265589	0.0172638	0.537954
XCL2	-0.263095	89	0.0127385	0.436287	0.372109	0.0114864	-0.258105	0.0184803	0.490266	-0.115013	0.309679	0.875323
MEI1	-0.236639	110	0.0128104	0.437959	0.373535	0.00542226	-0.253231	0.00949579	0.436424	-0.174229	0.086199	0.734996
SYCP2	-0.236301	110	0.012943	0.439569	0.374908	0.00712731	-0.238353	0.0158452	0.484251	-0.192482	0.056296	0.686643
CD160	-0.276752	80	0.0129503	0.439569	0.374908	0.0169367	-0.289479	0.0117676	0.454466	-0.119303	0.325259	0.878869
ADCY10	-0.238233	108	0.0130341	0.44083	0.375984	0.0124457	-0.255893	0.0105736	0.442603	-0.265487	0.00894246	0.484027
CD226	-0.239099	107	0.0131272	0.44254	0.377442	0.00816117	-0.257745	0.0103996	0.442603	-0.215157	0.0352736	0.624205
ANKRD18A	-0.274527	81	0.0131313	0.44254	0.377442	0.0044673	-0.288983	0.0119192	0.454466	-0.309467	0.00689822	0.46893
ATAD5	-0.231525	114	0.0131921	0.44301	0.377843	0.00688298	-0.259318	0.00755653	0.407557	-0.230211	0.0199272	0.556891
FAM114A1	-0.237677	108	0.0132539	0.444031	0.378714	0.00802575	-0.242447	0.0150834	0.479322	-0.164749	0.106833	0.753807
TTC29	-0.237544	108	0.0133071	0.444031	0.378714	0.00499047	-0.245399	0.0143558	0.479322	-0.244154	0.0165175	0.537923
RPL17-C18orf32	-0.270676	83	0.0133249	0.444031	0.378714	0.0127509	-0.278102	0.0143278	0.479322	-0.228826	0.0483029	0.660619
LOC653160	-0.331807	55	0.0133319	0.444031	0.378714	0.00989027	-0.330107	0.0205339	0.506122	-0.341182	0.0189279	0.555365
BCL9	-0.257014	92	0.0133916	0.444488	0.379104	0.0180723	-0.254041	0.0182619	0.490266	-0.233163	0.0328042	0.616049
NME7	-0.255615	93	0.0134004	0.444488	0.379104	0.00784823	-0.261533	0.0132987	0.470528	-0.184262	0.0913835	0.739497
CSRP3	-0.354137	48	0.0135313	0.446185	0.38055	0.0341096	-0.352358	0.0163223	0.48445	-0.384099	0.00768864	0.469175
TMEM116	-0.242601	103	0.0135457	0.446185	0.38055	0.00616078	-0.260559	0.00994813	0.436424	-0.223344	0.0323496	0.614956
USP38	-0.239988	105	0.0136686	0.448381	0.382424	0.0120851	-0.241986	0.0175336	0.490182	-0.264407	0.00961831	0.484027
CD28	-0.252206	95	0.0136762	0.448381	0.382424	0.00507937	-0.259033	0.0131629	0.468395	-0.239804	0.0261578	0.591925
COL4A6	-0.233261	111	0.0137462	0.448381	0.382424	0.00581912	-0.251504	0.0111795	0.448387	-0.198883	0.04844	0.660619
OPRM1	-0.248052	98	0.0137895	0.448381	0.382424	0.0104711	-0.268618	0.00962438	0.436424	-0.192908	0.0669458	0.69827
RFX5	-0.240745	104	0.0138253	0.448381	0.382424	0.00799004	-0.258532	0.0114171	0.450893	-0.172523	0.0963555	0.746854
TMEM150B	-0.249043	97	0.0138982	0.448381	0.382424	0.0121991	-0.252654	0.0151072	0.479322	-0.0497702	0.6471	0.957629
HELT	-0.246527	99	0.0138994	0.448381	0.382424	0.00575865	-0.251793	0.014903	0.479322	-0.205277	0.0522665	0.677602
FAM161A	-0.229745	114	0.0139342	0.448381	0.382424	0.0072274	-0.231027	0.0177325	0.490266	-0.249635	0.0109906	0.488854
PMEPA1	-0.268781	83	0.0140114	0.448381	0.382424	0.0195721	-0.257023	0.0240376	0.529255	-0.307732	0.00764849	0.469175
CLDN22	-0.246126	99	0.0140601	0.448381	0.382424	0.011539	-0.260454	0.0121601	0.458744	-0.185377	0.0837822	0.73031
C11orf84	-0.247281	98	0.0140964	0.448381	0.382424	0.0109072	-0.250533	0.0166099	0.485249	-0.278829	0.00814543	0.477312
ADAMTS20	-0.231379	112	0.0141034	0.448381	0.382424	0.00540952	-0.248169	0.0119043	0.454466	-0.234624	0.0187913	0.555365
LOC100130301	-0.24472	100	0.014133	0.448381	0.382424	0.00515393	-0.251282	0.0162777	0.48445	-0.243076	0.02097	0.558038
CXorf66	-0.243376	101	0.0141888	0.448381	0.382424	0.00607861	-0.267231	0.0104453	0.442603	-0.271345	0.00815909	0.477312
C17orf47	-0.232213	111	0.0141889	0.448381	0.382424	0.00948399	-0.259841	0.00868789	0.424302	-0.215627	0.0320734	0.614956
SWT1	-0.232179	111	0.0142037	0.448381	0.382424	0.00939468	-0.244941	0.0126436	0.46251	-0.275452	0.00554128	0.464094
TARSL2	-0.234187	109	0.0142468	0.448381	0.382424	0.0204691	-0.206443	0.038334	0.57504	-0.256552	0.010773	0.488126
TP53I13	-0.239618	104	0.0142896	0.448381	0.382424	0.0050303	-0.233621	0.0206027	0.506122	-0.171517	0.0983416	0.74795
SCAPER	-0.235074	108	0.014327	0.448381	0.382424	0.0107071	-0.246402	0.0134636	0.472152	-0.280958	0.0050734	0.451464
CGB2	-0.259984	88	0.0144365	0.448381	0.382424	0.00886845	-0.271226	0.0143176	0.479322	-0.292384	0.00849379	0.482794
BC037891	-0.255618	91	0.0144649	0.448381	0.382424	0.00821752	-0.239475	0.0302436	0.544821	-0.238826	0.0296763	0.600274
FOXM1	-0.231523	111	0.0144871	0.448381	0.382424	0.010623	-0.233758	0.0186381	0.491077	-0.272272	0.00587856	0.46893
C12orf71	-0.262808	86	0.0144989	0.448381	0.382424	0.00883608	-0.279857	0.0119312	0.454466	-0.283167	0.0125799	0.500376
CPLX4	-0.297362	67	0.0145351	0.448381	0.382424	0.0214939	-0.302977	0.0149518	0.479322	-0.103604	0.419068	0.911394
KLHL21	-0.301666	65	0.0146018	0.448381	0.382424	0.0210098	-0.253816	0.0545384	0.615475	-0.290841	0.0241692	0.580004
CNBD2	-0.238779	104	0.0146441	0.448381	0.382424	0.0053473	-0.231239	0.0241549	0.529255	-0.212529	0.0419587	0.645162
RHPN1	-0.247059	97	0.0147014	0.448381	0.382424	0.00933309	-0.267539	0.0107947	0.442603	-0.215517	0.0437391	0.647159
PSTK	-0.253606	92	0.0147172	0.448381	0.382424	0.0107953	-0.24052	0.0257007	0.529827	-0.250108	0.0243281	0.580648
S100B	-0.397779	37	0.0147645	0.448381	0.382424	0.0289015	-0.409369	0.0146067	0.479322	-0.378758	0.022729	0.570692
DCD	-0.377981	41	0.0148276	0.448381	0.382424	0.00990801	-0.368957	0.0226364	0.520692	-0.356907	0.0353191	0.624205
STYXL1	-0.232822	109	0.0148389	0.448381	0.382424	0.00691236	-0.245039	0.0135212	0.472268	-0.279114	0.00514666	0.451464
CCDC11	-0.234968	107	0.014843	0.448381	0.382424	0.00751995	-0.251586	0.0124561	0.460307	-0.316501	0.00177939	0.408751
PTTG1	-0.254633	91	0.0148608	0.448381	0.382424	0.00733791	-0.27461	0.0114736	0.450893	-0.284073	0.00925114	0.484027
C16orf46	-0.229631	112	0.0148685	0.448381	0.382424	0.00663175	-0.254892	0.00902077	0.431124	-0.239604	0.0163504	0.537291
CGB5	-0.260309	87	0.0148911	0.448381	0.382424	0.00723782	-0.273978	0.0133222	0.470528	-0.301513	0.00692686	0.46893
RMND1	-0.237035	105	0.0149078	0.448381	0.382424	0.0122427	-0.242048	0.0175034	0.490182	-0.220256	0.0310568	0.603667
WDR19	-0.240362	102	0.0149574	0.448381	0.382424	0.00798258	-0.250561	0.0148602	0.479322	-0.243495	0.0193403	0.555365
EFCAB11	-0.251449	93	0.0150451	0.450165	0.383945	0.0164218	-0.268568	0.0118966	0.454466	-0.133428	0.226285	0.838237
RPA1	-0.233232	108	0.0151314	0.451319	0.38493	0.00859753	-0.229785	0.0214578	0.511608	-0.17331	0.0878949	0.738098
BCAS1	-0.224893	116	0.0152192	0.452913	0.386289	0.00691536	-0.235958	0.0148912	0.479322	-0.145517	0.140507	0.788139
ANK2	-0.223821	117	0.0152722	0.452913	0.386289	0.0126445	-0.231417	0.0164698	0.484899	-0.278612	0.00400253	0.444552
TGIF2LX	-0.30441	63	0.0152804	0.452913	0.386289	0.00714176	-0.305015	0.0210507	0.508305	-0.412777	0.00192284	0.408751
KDM1B	-0.246892	96	0.0153078	0.453015	0.386376	0.0120584	-0.238639	0.0227251	0.522098	-0.27493	0.00996179	0.484027
POLR2G	-0.592704	16	0.015539	0.458325	0.390905	0.0201816	-0.59245	0.0155945	0.484251	-0.572935	0.0255833	0.5891
LOC339788	-0.370992	42	0.0155734	0.458325	0.390905	0.0125523	-0.373993	0.0225908	0.520571	-0.306728	0.0610591	0.692563
IZUMO3	-0.236501	104	0.0156452	0.458325	0.390905	0.00729996	-0.201188	0.0493501	0.60003	-0.199849	0.0534567	0.683133
ORC2	-0.24357	98	0.0156574	0.458325	0.390905	0.00832316	-0.256146	0.013719	0.47654	-0.192154	0.0728858	0.710231
RFNG	-0.276328	76	0.0156792	0.458325	0.390905	0.0121757	-0.226805	0.0590123	0.625926	-0.229449	0.0578924	0.689608
EXPH5	-0.222653	117	0.0158273	0.458325	0.390905	0.0118741	-0.266435	0.00553737	0.383985	-0.134153	0.172448	0.807399
USP48	-0.250874	92	0.0158605	0.458325	0.390905	0.00633255	-0.209159	0.0504983	0.602708	-0.2735	0.0118257	0.497415
FGFR2	-0.279388	74	0.0159224	0.458325	0.390905	0.0175285	-0.265141	0.0233901	0.526334	-0.226813	0.0649303	0.695461
FN1	-0.234555	105	0.0160224	0.458325	0.390905	0.015125	-0.24851	0.0131279	0.468031	-0.261038	0.0110467	0.488854
STON1-GTF2A1L	-0.227108	112	0.0160367	0.458325	0.390905	0.00770589	-0.249613	0.0114035	0.450893	-0.271406	0.00630646	0.46893
PRPH2	-0.25747	87	0.0160611	0.458325	0.390905	0.0158683	-0.253325	0.0224987	0.520571	-0.243712	0.0304351	0.601552
MSL3	-0.263514	83	0.016083	0.458325	0.390905	0.00956849	-0.268527	0.0174487	0.49009	-0.263737	0.0213338	0.558516
ZSCAN9	-0.261812	84	0.0161409	0.458325	0.390905	0.0126261	-0.252788	0.0286616	0.542811	-0.222953	0.0528817	0.68166
SYNE2	-0.221046	118	0.0161527	0.458325	0.390905	0.0116347	-0.233766	0.0144271	0.479322	-0.190578	0.0503675	0.670904
NPL	-0.257227	87	0.0161648	0.458325	0.390905	0.00624727	-0.272162	0.0145951	0.479322	-0.182265	0.112618	0.758895
CCDC102B	-0.237518	102	0.0162274	0.459413	0.391833	0.0101311	-0.264607	0.00995908	0.436424	-0.180732	0.0846998	0.732388
FIGLA	-0.265982	81	0.0163933	0.46218	0.394193	0.00642354	-0.276329	0.0164034	0.48445	-0.272526	0.0214886	0.560701
FTMT	-0.256667	87	0.0164063	0.46218	0.394193	0.00960807	-0.180311	0.107221	0.693969	-0.265551	0.01728	0.537954
HELZ	-0.235945	103	0.0164249	0.46218	0.394193	0.00914591	-0.232968	0.0238415	0.528506	-0.258583	0.0123257	0.499766
XPO1	-0.541993	19	0.0165237	0.46218	0.394193	0.0259838	-0.532818	0.0228063	0.522644	-0.492117	0.0380293	0.631493
EIF4E2	-0.355554	45	0.0165337	0.46218	0.394193	0.026815	-0.350302	0.0212843	0.511608	-0.263548	0.0959282	0.745881
CDCA8	-0.245392	95	0.0165347	0.46218	0.394193	0.00846304	-0.251685	0.0161014	0.484251	-0.196319	0.071744	0.706425
ANGPTL5	-0.246651	94	0.0165514	0.46218	0.394193	0.0194508	-0.251221	0.0182277	0.490266	-0.0113609	0.918306	0.988902
DNMT1	-0.231217	107	0.0165659	0.46218	0.394193	0.00762167	-0.224472	0.0255034	0.529794	-0.317606	0.00161494	0.408751
ZNF132	-0.26556	81	0.0165712	0.46218	0.394193	0.0085904	-0.28425	0.0134531	0.472152	-0.229039	0.0480893	0.660547
PDLIM1	-0.254784	88	0.0165936	0.46218	0.394193	0.0145897	-0.233042	0.0328981	0.55856	-0.182722	0.10933	0.758299
FOXI2	-0.265385	81	0.0166456	0.462218	0.394226	0.0168204	-0.212538	0.0730653	0.647513	-0.250855	0.0335507	0.619574
CCDC88C	-0.222894	115	0.0166492	0.462218	0.394226	0.011096	-0.231196	0.0165761	0.485011	-0.227187	0.021009	0.558038
RPS3	-0.313205	58	0.0166682	0.462218	0.394226	0.0112529	-0.324793	0.0155464	0.484251	-0.349968	0.00948232	0.484027
INSR	-0.254418	88	0.0167555	0.463339	0.395182	0.00691574	-0.266988	0.0146893	0.479322	-0.275266	0.0123171	0.499766
ANKRD36B	-0.358805	44	0.0167673	0.463339	0.395182	0.00619224	-0.371954	0.0214776	0.511608	-0.368705	0.0227361	0.570692
SH2D1A	-0.321244	55	0.016782	0.463339	0.395182	0.0134239	-0.306025	0.025845	0.529827	-0.197635	0.173451	0.808212
MLF1IP	-0.233377	104	0.017114	0.469875	0.400756	0.005869	-0.253303	0.0137656	0.477285	-0.266999	0.0100869	0.484027
BPTF	-0.225926	111	0.0171141	0.469875	0.400756	0.0048535	-0.22083	0.0249887	0.529794	-0.255525	0.0106897	0.48638
FAM213B	-0.260881	83	0.0172141	0.469875	0.400756	0.00708577	-0.235909	0.0402108	0.578443	-0.266278	0.0209347	0.558038
E2F3	-0.283938	70	0.0172154	0.469875	0.400756	0.0137895	-0.267943	0.0283656	0.542811	-0.380528	0.00192338	0.408751
C17orf66	-0.233167	104	0.0172172	0.469875	0.400756	0.01165	-0.229595	0.0244334	0.529689	-0.250212	0.0155661	0.531131
TCTN2	-0.224366	112	0.017396	0.470465	0.40126	0.00359805	-0.22162	0.0244612	0.529689	-0.187885	0.0586194	0.690984
EFCAB2	-0.258833	84	0.0174368	0.470465	0.40126	0.0160529	-0.265496	0.0180409	0.490266	-0.286461	0.0115453	0.495009
TNFSF10	-0.232643	104	0.0174761	0.470465	0.40126	0.00743643	-0.241942	0.0158357	0.484251	-0.15427	0.137651	0.78666
POTEA	-0.273748	75	0.017478	0.470465	0.40126	0.00744201	-0.291694	0.0157993	0.484251	-0.265782	0.0297169	0.600274
SAMHD1	-0.223051	113	0.017563	0.470465	0.40126	0.00800179	-0.257065	0.00781105	0.411594	-0.122857	0.218635	0.834794
GNAO1	-0.313331	57	0.0176305	0.470465	0.40126	0.0192587	-0.300292	0.028909	0.542811	-0.286144	0.041791	0.644609
ZBTB2	-0.255299	86	0.0176749	0.470465	0.40126	0.0174192	-0.247405	0.0289758	0.542811	-0.271794	0.0153907	0.531131
ZNF862	-0.232176	104	0.0177098	0.470465	0.40126	0.00948907	-0.224526	0.0295857	0.542811	-0.147311	0.154275	0.796725
NAA60	-0.318575	55	0.0177654	0.470465	0.40126	0.0182016	-0.323035	0.0183098	0.490266	-0.212892	0.133635	0.781419
TEX13A	-0.261126	82	0.0178091	0.470465	0.40126	0.00380344	-0.233894	0.0434174	0.589881	-0.289364	0.014383	0.521203
EBI3	-0.233031	103	0.0178433	0.470465	0.40126	0.00653735	-0.231602	0.0247004	0.529794	-0.287861	0.00565951	0.464889
GRHL2	-0.242568	95	0.0178627	0.470465	0.40126	0.00992809	-0.250053	0.0181121	0.490266	-0.254269	0.0168215	0.537954
DOCK1	-0.24645	92	0.0178749	0.470465	0.40126	0.0114512	-0.23496	0.0275561	0.538354	-0.177776	0.10786	0.753902
SYAP1	-0.243726	94	0.0179229	0.470465	0.40126	0.00720754	-0.245108	0.0198891	0.501154	-0.279442	0.00917017	0.484027
NTMT1	-0.278127	72	0.0180029	0.470465	0.40126	0.00783108	-0.255498	0.0354775	0.570443	-0.291918	0.0157156	0.531995
GHR	-0.224131	111	0.0180393	0.470465	0.40126	0.00655392	-0.252006	0.0102301	0.442603	-0.199184	0.0469498	0.659239
RIF1	-0.219262	116	0.0180399	0.470465	0.40126	0.00841835	-0.230345	0.0169904	0.486605	-0.185154	0.0598774	0.692403
AK124439	-0.248704	90	0.0180936	0.470465	0.40126	0.0221091	-0.230746	0.0382191	0.57504	-0.193043	0.086229	0.734996
TCERG1	-0.279821	71	0.0181088	0.470465	0.40126	0.0110913	-0.270037	0.0259442	0.529827	-0.235283	0.0634171	0.694934
XPO6	-0.247242	91	0.0181403	0.470465	0.40126	0.00599544	-0.253484	0.0178373	0.490266	-0.184009	0.095866	0.745808
EFCAB3	-0.229071	106	0.0181783	0.470465	0.40126	0.009371	-0.248122	0.0147897	0.479322	-0.220016	0.0321626	0.614956
ERCC4	-0.223861	111	0.0181827	0.470465	0.40126	0.0139163	-0.237659	0.0161625	0.484251	-0.186555	0.0644738	0.695461
PLCZ1	-0.221715	113	0.0182692	0.471482	0.402127	0.00956954	-0.237122	0.0148699	0.479322	-0.2521	0.0109825	0.488854
ZNF544	-0.272988	74	0.0186109	0.47525	0.40534	0.0107244	-0.300554	0.0127616	0.462816	-0.305576	0.011275	0.488854
FKSG40	-0.271065	75	0.0186585	0.47525	0.40534	0.0106848	-0.239517	0.044244	0.589881	-0.231672	0.0612476	0.692563
FANCD2	-0.221842	112	0.0187337	0.47525	0.40534	0.0117835	-0.234795	0.0169726	0.486605	-0.175776	0.07573	0.715224
OR8B4	-0.239508	96	0.0187599	0.47525	0.40534	0.0153057	-0.220285	0.0380476	0.57504	-0.179172	0.100854	0.749452
LOC100289092	-0.250097	88	0.0187709	0.47525	0.40534	0.00974282	-0.263178	0.0162235	0.48445	-0.158208	0.166535	0.804634
BBS12	-0.233447	101	0.0187998	0.47525	0.40534	0.00885497	-0.230147	0.0273122	0.53774	-0.244212	0.0189757	0.555365
PRRC2B	-0.218755	115	0.0188349	0.47525	0.40534	0.0112634	-0.238153	0.0144276	0.479322	-0.143477	0.14822	0.794589
PAFAH1B1	-0.532659	19	0.0188749	0.47525	0.40534	0.00814644	-0.497802	0.035531	0.570443	-0.511271	0.0359419	0.624205
STAT2	-0.22456	109	0.0188991	0.47525	0.40534	0.011573	-0.206534	0.0392403	0.577995	-0.211842	0.037246	0.63002
FKSG29	-0.242837	93	0.0190074	0.476068	0.406038	0.00654665	-0.246629	0.0220701	0.517541	-0.120672	0.274216	0.863065
TTLL3	-0.2223	111	0.0190276	0.476068	0.406038	0.0109307	-0.219274	0.0268092	0.535049	-0.170215	0.0904308	0.739137
TMEM9B	-0.298789	61	0.019333	0.481525	0.410692	0.00749007	-0.293268	0.0254689	0.529794	-0.247827	0.0606988	0.692403
RPUSD3	-0.225646	107	0.0194437	0.482603	0.411611	0.00510628	-0.214553	0.0329608	0.559122	-0.225595	0.0271061	0.591925
APOBR	-0.222546	110	0.0194492	0.482603	0.411611	0.00370969	-0.217602	0.0280218	0.540755	-0.190805	0.0598411	0.692403
PABPC4L	-0.243248	92	0.0194672	0.482603	0.411611	0.00351529	-0.209572	0.0542316	0.615117	-0.249638	0.0220172	0.56488
ZNRD1	-0.255759	83	0.0196115	0.483614	0.412474	0.0151392	-0.220809	0.0520529	0.60753	-0.269872	0.0192048	0.555365
CGB8	-0.262121	79	0.0196161	0.483614	0.412474	0.0100415	-0.261451	0.0254633	0.529794	-0.316876	0.00709369	0.46893
CTSF	-0.234136	99	0.0196715	0.483614	0.412474	0.00448798	-0.222223	0.0363438	0.570443	-0.227042	0.0344486	0.623318
LYST	-0.221119	111	0.0196894	0.483614	0.412474	0.0201112	-0.1187	0.2324	0.795521	-0.0955892	0.344127	0.884362
NTF4	-0.242719	92	0.0197413	0.483614	0.412474	0.00413005	-0.255278	0.0183783	0.490266	-0.232248	0.0335151	0.619574
LOC100128264	-0.25244	85	0.0197633	0.483614	0.412474	0.0101461	-0.267044	0.0173555	0.489652	-0.224668	0.0479806	0.660012
PHF16	-0.225969	106	0.0198527	0.484548	0.413271	0.006929	-0.245057	0.0150149	0.479322	-0.29605	0.00376569	0.434616
CNTD2	-0.256334	82	0.0200961	0.486942	0.415312	0.00820992	-0.264908	0.0207432	0.506432	-0.282223	0.0135106	0.516352
DZIP1	-0.220368	111	0.0201207	0.486942	0.415312	0.00917857	-0.233739	0.0180589	0.490266	-0.172876	0.0838457	0.73031
ANKLE2	-0.217428	114	0.0201373	0.486942	0.415312	0.0115268	-0.233665	0.0154227	0.48339	-0.0843139	0.39713	0.90187
NUGGC	-0.219341	112	0.0201461	0.486942	0.415312	0.00754524	-0.233949	0.0173854	0.489767	-0.163302	0.101012	0.74949
LSMD1	-0.245791	89	0.0202466	0.487363	0.415671	0.00852976	-0.224418	0.0413868	0.582112	-0.175012	0.118119	0.764424
CCDC142	-0.225047	106	0.0203751	0.487363	0.415671	0.00610308	-0.237493	0.0173492	0.489652	-0.259055	0.0112459	0.488854
SLC26A10	-0.2352	97	0.0203919	0.487363	0.415671	0.00864685	-0.216108	0.039646	0.577995	-0.167621	0.118522	0.764424
SGK2	-0.228247	103	0.0204012	0.487363	0.415671	0.00869947	-0.22799	0.0262763	0.532019	-0.16778	0.107935	0.754126
C1QTNF6	-0.229243	102	0.0204679	0.487363	0.415671	0.00586612	-0.227957	0.0271235	0.537241	-0.19533	0.0606097	0.692403
FAM195A	-0.309022	56	0.0204826	0.487363	0.415671	0.0182926	-0.26367	0.061549	0.633309	-0.31821	0.0215062	0.560701
CCDC180	-0.2196	111	0.0205702	0.488649	0.416768	0.00684108	-0.253397	0.0105645	0.442603	-0.187275	0.0634315	0.694934
CCDC33	-0.219526	111	0.0206141	0.488649	0.416768	0.0101147	-0.207895	0.0360175	0.570443	-0.229519	0.0222966	0.568524
CHSY1	-0.240461	92	0.0209505	0.492147	0.419752	0.00996072	-0.22433	0.0367209	0.570443	-0.270498	0.0145914	0.522091
ANGPTL7	-0.236527	95	0.0210151	0.492147	0.419752	0.0162174	-0.227329	0.0331699	0.559255	-0.160607	0.139617	0.787477
VAPB	-0.264307	76	0.0210447	0.492147	0.419752	0.0206596	-0.268211	0.0217757	0.515574	-0.135436	0.267176	0.859551
TTC21A	-0.220794	109	0.0210475	0.492147	0.419752	0.00748286	-0.222066	0.0263819	0.533585	-0.292606	0.00345831	0.423809
EML1	-0.2389	93	0.0210987	0.492172	0.419773	0.0140893	-0.240759	0.0255493	0.529794	-0.152146	0.16972	0.806745
NLRP12	-0.249761	85	0.0211525	0.492172	0.419773	0.00686304	-0.236986	0.034297	0.564097	-0.238589	0.0406442	0.642474
MB21D1	-0.241266	91	0.0212303	0.493377	0.420801	0.00587272	-0.269356	0.0138001	0.477604	-0.286498	0.0104742	0.484027
RGSL1	-0.2289	101	0.0213102	0.493627	0.421014	0.00763962	-0.235116	0.0232918	0.526334	-0.226502	0.0328074	0.616049
C10orf90	-0.215423	114	0.0213442	0.493627	0.421014	0.0178256	-0.235615	0.0160504	0.484251	-0.106516	0.286635	0.867796
IQCC	-0.222322	107	0.0213583	0.493627	0.421014	0.00573242	-0.224319	0.0256067	0.529794	-0.199931	0.0520709	0.676922
SLC22A16	-0.231034	99	0.0214037	0.493627	0.421014	0.0060916	-0.238276	0.022939	0.524468	-0.228874	0.0329813	0.617692
CAMK4	-0.234607	96	0.0214044	0.493627	0.421014	0.011413	-0.242277	0.0214084	0.511608	-0.272834	0.0105665	0.484882
TBL1X	-0.252236	83	0.0214219	0.493627	0.421014	0.0177849	-0.258994	0.0220409	0.517541	-0.200756	0.0841633	0.73031
LYSMD4	-0.228617	101	0.0214755	0.493766	0.421133	0.00723541	-0.218847	0.0350687	0.569971	-0.280313	0.00745098	0.469175
URM1	-0.24332	89	0.0215803	0.49417	0.421477	0.01324	-0.251157	0.0220044	0.517541	-0.114468	0.308893	0.875323
G6PD	-0.229536	100	0.0216036	0.49417	0.421477	0.00522332	-0.21921	0.0328148	0.558146	-0.156303	0.141251	0.789172
UBXN2A	-0.244485	88	0.0216965	0.494364	0.421642	0.00534118	-0.240647	0.0274522	0.53774	-0.281048	0.0126836	0.503304
SLCO6A1	-0.223827	105	0.0217165	0.494364	0.421642	0.00487875	-0.245703	0.0163937	0.48445	-0.22336	0.029571	0.600274
FAM102A	-0.256024	80	0.0218909	0.496054	0.423084	0.0181381	-0.27198	0.0167171	0.485802	-0.243083	0.0396381	0.638994
MED27	-0.361533	40	0.0218955	0.496054	0.423084	0.0210376	-0.358881	0.0248569	0.529794	-0.369292	0.0266528	0.591925
METTL6	-0.231209	98	0.0219859	0.496548	0.423506	0.00842461	-0.245005	0.0199426	0.501154	-0.225192	0.031861	0.614956
PDZK1	-0.226525	102	0.0220539	0.497263	0.424115	0.0146085	-0.240708	0.0181569	0.490266	-0.154336	0.141857	0.789172
BC040304	-0.253848	81	0.0222126	0.499651	0.426151	0.0054272	-0.262116	0.0250786	0.529794	-0.222004	0.0590674	0.690984
ENO4	-0.218829	109	0.0222496	0.499775	0.426257	0.013997	-0.238661	0.0162392	0.48445	-0.171915	0.0922251	0.742824
FAM228B	-0.229518	99	0.0222968	0.499775	0.426257	0.0131717	-0.230511	0.0279325	0.540133	-0.295172	0.00551197	0.463691
XIRP2	-0.210232	118	0.0223134	0.499775	0.426257	0.00852619	-0.22786	0.0177053	0.490266	-0.156299	0.109607	0.758828
IL18BP	-0.230639	98	0.0223236	0.499775	0.426257	0.00525476	-0.254567	0.0148875	0.479322	-0.137857	0.200247	0.825179
MAPT	-0.21379	114	0.0223736	0.500187	0.426609	0.0064916	-0.218777	0.0249484	0.529794	-0.204864	0.0369657	0.628961
ZNF646	-0.211908	116	0.0223948	0.500187	0.426609	0.0118137	-0.217766	0.0235743	0.526334	-0.238239	0.0143913	0.521203
KPNA1	-0.355731	41	0.0224551	0.500243	0.426657	0.0189857	-0.313766	0.0550688	0.616869	-0.370641	0.0219789	0.56488
NES	-0.214585	113	0.022468	0.500243	0.426657	0.0055233	-0.230227	0.0181416	0.490266	-0.194468	0.0501639	0.670375
SLC25A19	-0.22365	104	0.0224766	0.500243	0.426657	0.0101182	-0.232622	0.0218529	0.515832	-0.257102	0.012365	0.499766
PCSK5	-0.209746	118	0.022632	0.501191	0.427466	0.00606725	-0.205906	0.0317129	0.551798	-0.180014	0.0648196	0.695461
VPS13B	-0.21337	114	0.0226444	0.501191	0.427466	0.00793837	-0.223843	0.0223575	0.518689	-0.219133	0.0269097	0.591925
CREBRF	-0.252878	81	0.0227452	0.501191	0.427466	0.0127728	-0.246602	0.0317549	0.552023	-0.311185	0.00621571	0.46893
GINS3	-0.245214	86	0.0228693	0.501191	0.427466	0.00912251	-0.257797	0.0201506	0.503442	-0.341619	0.00252584	0.410762
PRUNE2	-0.209271	118	0.0229474	0.501191	0.427466	0.00650934	-0.217266	0.0239036	0.528629	-0.194755	0.0454406	0.653571
NLRP5	-0.27756	67	0.022963	0.501191	0.427466	0.0223168	-0.294075	0.0225683	0.520571	-0.17211	0.188528	0.817068
ASPHD2	-0.242228	88	0.0229792	0.501191	0.427466	0.0160698	-0.238808	0.0307209	0.550486	-0.164699	0.146928	0.794131
SMIM9	-0.250913	82	0.022982	0.501191	0.427466	0.0134719	-0.237545	0.0375045	0.572118	-0.215651	0.0613556	0.692563
C15orf60	-0.222803	104	0.0230052	0.501191	0.427466	0.00751655	-0.222616	0.029254	0.542811	-0.224745	0.0294234	0.600274
C4orf36	-0.233035	95	0.0230467	0.501191	0.427466	0.0110662	-0.247034	0.0203227	0.504893	-0.250344	0.0200842	0.557005
C9orf171	-0.229312	98	0.0231285	0.501191	0.427466	0.0141767	-0.215493	0.0391149	0.577995	-0.176026	0.0970012	0.747766
MAP1LC3B	-0.377488	36	0.0232256	0.501191	0.427466	0.0299725	-0.335528	0.0523893	0.609237	-0.392279	0.0239491	0.577462
APOD	-0.22908	98	0.023272	0.501191	0.427466	0.0100098	-0.226196	0.0310856	0.550486	-0.292297	0.00601059	0.46893
LINC00473	-0.278965	66	0.0233135	0.501191	0.427466	0.00711998	-0.268788	0.0378373	0.574878	-0.310927	0.0175196	0.543626
SREBF2	-0.215123	111	0.0233642	0.501191	0.427466	0.00884522	-0.191797	0.0534641	0.612826	-0.140069	0.166726	0.804634
RSF1	-0.221148	105	0.0233829	0.501191	0.427466	0.00767441	-0.222565	0.0260366	0.529999	-0.248196	0.0158641	0.531995
PIFO	-0.222193	104	0.0233923	0.501191	0.427466	0.0115449	-0.134473	0.193861	0.769664	-0.214704	0.0377016	0.631486
AMOTL1	-0.22539	101	0.0234396	0.501191	0.427466	0.0165043	-0.233555	0.02348	0.526334	-0.169439	0.0988687	0.749265
GP5	-0.223172	103	0.0234535	0.501191	0.427466	0.0101793	-0.226906	0.0262039	0.53112	-0.236638	0.0239237	0.577462
ADAMTS12	-0.211175	115	0.0234839	0.501191	0.427466	0.00749168	-0.22012	0.0233725	0.526334	-0.123992	0.209828	0.828283
PCDH12	-0.217895	108	0.0234897	0.501191	0.427466	0.00825631	-0.208522	0.0363849	0.570443	-0.217483	0.0323646	0.614956
HSPE1-MOB4	-0.470131	23	0.0235908	0.501191	0.427466	0.038988	-0.512761	0.0207859	0.506432	-0.448009	0.03653	0.626873
EFCC1	-0.259279	76	0.0237155	0.501191	0.427466	0.0141587	-0.210548	0.0872271	0.672407	-0.308776	0.00983897	0.484027
TGIF2LY	-0.352671	41	0.0237236	0.501191	0.427466	0.014763	-0.345595	0.0361655	0.570443	-0.362177	0.0234674	0.571673
AATK	-0.222738	103	0.0237316	0.501191	0.427466	0.012213	-0.224015	0.0308795	0.550486	-0.229584	0.0268467	0.591925
AK055055	-0.264334	73	0.0238306	0.501191	0.427466	0.00739325	-0.247559	0.0388081	0.577596	-0.211013	0.0865161	0.735659
SH3BP4	-0.223593	102	0.0238818	0.501191	0.427466	0.0230085	-0.222636	0.0301166	0.544655	-0.0813022	0.44104	0.915247
PPP2R5C	-0.243459	86	0.0238952	0.501191	0.427466	0.0134255	-0.243429	0.0275404	0.538354	-0.280681	0.0128051	0.504139
RCOR1	-0.275712	67	0.0239273	0.501191	0.427466	0.0143496	-0.256336	0.0425725	0.586138	-0.154275	0.231219	0.841679
FAM129A	-0.209577	116	0.0239513	0.501191	0.427466	0.00974415	-0.23973	0.0128811	0.464391	-0.194812	0.0475102	0.659239
C1QTNF1	-0.230331	96	0.023967	0.501191	0.427466	0.00737707	-0.243039	0.0233141	0.526334	-0.144919	0.18049	0.814261
AKT3	-0.468862	23	0.024021	0.501191	0.427466	0.0484044	-0.451222	0.0350469	0.569971	-0.442537	0.044549	0.648461
DCAF8	-0.281865	64	0.024043	0.501191	0.427466	0.0211355	-0.266273	0.0380568	0.57504	-0.229102	0.0836491	0.730309
SGMS2	-0.255285	78	0.0240872	0.501191	0.427466	0.0133526	-0.292273	0.0115088	0.451081	-0.225964	0.0581195	0.690984
TNIP3	-0.218894	106	0.0241747	0.501191	0.427466	0.0110764	-0.232175	0.0228317	0.522644	-0.263369	0.0103253	0.484027
NLRC5	-0.214815	110	0.0242192	0.501191	0.427466	0.0102243	-0.219442	0.0259383	0.529827	-0.198364	0.050229	0.670375
DUSP13	-0.215633	109	0.0243295	0.501191	0.427466	0.00613795	-0.231556	0.019811	0.501154	-0.169074	0.0943332	0.745176
CASC1	-0.215552	109	0.0243845	0.501191	0.427466	0.00680979	-0.219489	0.0266561	0.533997	-0.217335	0.0324859	0.614956
LRRC70	-0.222814	102	0.0243885	0.501191	0.427466	0.00593404	-0.219082	0.0319877	0.554541	-0.212949	0.043889	0.647159
NBN	-0.218514	106	0.0244276	0.501191	0.427466	0.00904412	-0.216144	0.0283186	0.542811	-0.207729	0.0433858	0.647159
CASP8AP2	-0.209757	115	0.0244547	0.501191	0.427466	0.00614855	-0.224177	0.0215063	0.511608	-0.199609	0.0432308	0.647159
C1orf101	-0.215388	109	0.0244959	0.501191	0.427466	0.00407814	-0.221798	0.0273562	0.53774	-0.229965	0.0234519	0.571673
CCDC79	-0.220432	104	0.0245422	0.501191	0.427466	0.00532097	-0.215629	0.0320713	0.554794	-0.239923	0.0191892	0.555365
BHLHA9	-0.24667	83	0.0245731	0.501191	0.427466	0.00724989	-0.243657	0.0315795	0.550486	-0.192383	0.100561	0.749452
SLC13A4	-0.221086	103	0.0248167	0.504565	0.430343	0.0112422	-0.228606	0.0250725	0.529794	-0.171071	0.0992339	0.749265
MID1	-0.282588	63	0.024832	0.504565	0.430343	0.0198633	-0.300268	0.0220146	0.517541	-0.167037	0.218522	0.834794
ZBTB39	-0.221055	103	0.0248378	0.504565	0.430343	0.00959581	-0.226247	0.0266541	0.533997	-0.148029	0.15676	0.79713
FASLG	-0.227757	97	0.0248553	0.504565	0.430343	0.0140414	-0.204414	0.0546668	0.615475	-0.150194	0.162493	0.801396
PPP1R42	-0.233527	92	0.0250675	0.50524	0.430919	0.0103964	-0.235806	0.0278957	0.540133	-0.255051	0.018486	0.55277
RPS6KA5	-0.236069	90	0.025091	0.50524	0.430919	0.018034	-0.241133	0.024454	0.529689	-0.296692	0.0075314	0.469175
TNFSF4	-0.238669	88	0.0251319	0.50524	0.430919	0.00950855	-0.244768	0.0248343	0.529794	-0.245407	0.0272289	0.591925
C19orf68	-0.253359	78	0.0252123	0.50524	0.430919	0.0042091	-0.253142	0.0344837	0.566677	-0.21337	0.0829779	0.730309
GGPS1	-0.263561	72	0.0252887	0.50524	0.430919	0.017318	-0.172388	0.166322	0.7538	-0.288011	0.0210096	0.558038
VAC14	-0.219275	104	0.025323	0.50524	0.430919	0.00687053	-0.227393	0.0258754	0.529827	-0.198321	0.0553467	0.686643
GON4L	-0.217142	106	0.0253614	0.50524	0.430919	0.00880761	-0.215341	0.0323074	0.556027	-0.166574	0.106667	0.753807
NUDT17	-0.231708	93	0.025431	0.50524	0.430919	0.00913545	-0.240489	0.0266222	0.533997	-0.145766	0.188547	0.817068
ARHGAP30	-0.210179	113	0.025456	0.50524	0.430919	0.00798154	-0.234663	0.0164954	0.484899	-0.190526	0.0538886	0.683649
TNFRSF25	-0.224538	99	0.0254594	0.50524	0.430919	0.0120552	-0.244949	0.020693	0.506122	-0.164578	0.11695	0.762795
ABHD14A	-0.226691	97	0.0255584	0.50524	0.430919	0.0116627	-0.22347	0.0332289	0.559255	-0.272456	0.00979232	0.484027
EXOC7	-0.249565	80	0.0255821	0.50524	0.430919	0.0137039	-0.253508	0.0271302	0.537241	-0.280931	0.0184843	0.55277
APEX2	-0.220982	102	0.0256166	0.505394	0.43105	0.0050533	-0.255329	0.0125166	0.460307	-0.218852	0.0371431	0.629701
AKNAD1	-0.208659	114	0.0258875	0.508923	0.43406	0.00459645	-0.225834	0.0211615	0.510329	-0.235855	0.0170128	0.537954
SEMA4B	-0.216346	106	0.0259164	0.508923	0.43406	0.008945	-0.223821	0.0251852	0.529794	-0.148045	0.154446	0.796725
MAMLD1	-0.207588	115	0.0260057	0.509358	0.434431	0.0134808	-0.220542	0.0237753	0.528321	-0.186268	0.0595835	0.692403
CLEC9A	-0.218193	104	0.0260726	0.509731	0.434749	0.00971147	-0.236364	0.0218147	0.515574	-0.154077	0.140323	0.788139
CDCA4	-0.230683	93	0.0261056	0.509731	0.434749	0.0108228	-0.252005	0.0192471	0.495736	-0.157292	0.153027	0.795788
C10orf131	-0.225733	97	0.0262046	0.510361	0.435287	0.00771727	-0.255289	0.0151651	0.480084	-0.233301	0.0296514	0.600274
ANKRD11	-0.211961	110	0.0262159	0.510361	0.435287	0.0152295	-0.211703	0.0326779	0.557321	-0.0566365	0.577653	0.942437
ZCCHC2	-0.228019	95	0.0262564	0.510361	0.435287	0.0177778	-0.219073	0.0391471	0.577995	-0.263721	0.0153546	0.531131
GPR183	-0.225633	97	0.0262726	0.510361	0.435287	0.018813	-0.235207	0.0256423	0.529827	-0.117339	0.276259	0.863065
GAB3	-0.217479	104	0.0265777	0.514304	0.438649	0.0197182	-0.227775	0.0248437	0.529794	-0.0968675	0.358316	0.888437
SLC48A1	-0.330525	45	0.0265841	0.514304	0.438649	0.021756	-0.271612	0.0780888	0.656365	-0.40763	0.00903279	0.484027
LINC00486	-0.346112	41	0.0266453	0.514961	0.439209	0.0104421	-0.313622	0.0551872	0.617283	-0.253389	0.141909	0.789172
ABL1	-0.218297	103	0.0267451	0.516362	0.440405	0.00764613	-0.245523	0.0159025	0.484251	-0.186876	0.0682867	0.700938
LAPTM4B	-0.241115	84	0.0271434	0.519813	0.443348	0.00460377	-0.256156	0.025515	0.529794	-0.203251	0.0724086	0.708661
FERMT1	-0.214614	106	0.0271611	0.519813	0.443348	0.00969541	-0.197263	0.051544	0.60677	-0.141192	0.172315	0.807399
MC3R	-0.219801	101	0.0272054	0.519813	0.443348	0.0158867	-0.229337	0.0270155	0.536506	-0.16104	0.129438	0.778229
PRDM5	-0.225375	96	0.0272602	0.519813	0.443348	0.0069022	-0.223593	0.0341378	0.563437	-0.299064	0.00464844	0.451031
GFRA4	-0.251644	77	0.0272647	0.519813	0.443348	0.0154364	-0.243466	0.0422575	0.584034	-0.219466	0.0743542	0.715102
KIAA1549	-0.204988	116	0.0272879	0.519813	0.443348	0.0197539	-0.203287	0.0357199	0.570443	-0.178513	0.0698211	0.702991
FOXF1	-0.277892	63	0.0274429	0.520356	0.443811	0.030891	-0.22429	0.0849208	0.669569	-0.324782	0.0137033	0.516686
IL5RA	-0.212127	108	0.0275256	0.520356	0.443811	0.0102724	-0.232908	0.0210036	0.508305	-0.204245	0.0436642	0.647159
STAT6	-0.216135	104	0.0275507	0.520356	0.443811	0.0116392	-0.218063	0.0328147	0.558146	-0.209632	0.0425749	0.647159
CIZ1	-0.212995	107	0.0276156	0.520356	0.443811	0.00650462	-0.223181	0.0271764	0.537593	-0.186886	0.0697637	0.702991
C5	-0.205421	115	0.0276387	0.520356	0.443811	0.00499624	-0.228498	0.0190532	0.494104	-0.120197	0.226521	0.838237
PAPLN	-0.204461	116	0.027695	0.520507	0.44394	0.0102062	-0.199459	0.0403787	0.578723	-0.162477	0.0993755	0.749265
C12orf5	-0.220056	100	0.0278117	0.521854	0.445089	0.0118241	-0.217621	0.0351168	0.569971	-0.28374	0.00672612	0.46893
FANCB	-0.206067	114	0.0278342	0.521854	0.445089	0.00672575	-0.214306	0.0281446	0.541452	-0.182566	0.0662729	0.698064
UBE4B	-0.212674	107	0.0278561	0.521854	0.445089	0.0117099	-0.227594	0.0242075	0.529593	-0.138165	0.177141	0.810058
SSTR2	-0.235698	87	0.0279701	0.522857	0.445944	0.0120078	-0.237956	0.0313404	0.550486	-0.165768	0.141689	0.789172
SPDYC	-0.242737	82	0.0279985	0.522857	0.445944	0.00777995	-0.204126	0.0810757	0.660716	-0.203457	0.0759409	0.715224
KIF2C	-0.214474	105	0.0280182	0.522857	0.445944	0.00860605	-0.242636	0.0160732	0.484251	-0.289715	0.00419518	0.450877
FAM160B1	-0.216465	103	0.028079	0.522857	0.445944	0.0131341	-0.188958	0.0666673	0.645343	-0.150789	0.146863	0.794131
ZNF577	-0.255381	74	0.0280902	0.522857	0.445944	0.00730634	-0.244786	0.047602	0.593854	-0.232629	0.0562595	0.686643
COX7A1	-0.241081	83	0.0281253	0.522857	0.445944	0.00642041	-0.221014	0.0518295	0.60753	-0.14538	0.213313	0.83095
MIA2	-0.20844	111	0.0281377	0.522857	0.445944	0.00534013	-0.22864	0.0201801	0.503442	-0.189101	0.0595274	0.692403
CXorf22	-0.204732	115	0.0281761	0.522857	0.445944	0.00799595	-0.212487	0.029541	0.542811	-0.261601	0.00730845	0.46893
CEBPZ	-0.209287	110	0.0282133	0.522857	0.445944	0.00648033	-0.212644	0.0310458	0.550486	-0.256238	0.0104658	0.484027
BPIFB6	-0.210061	109	0.0283551	0.522982	0.446051	0.00332677	-0.19584	0.048535	0.597827	-0.159066	0.117712	0.764079
KCNU1	-0.220387	99	0.0283794	0.522982	0.446051	0.0052985	-0.22942	0.0287035	0.542811	-0.221415	0.0359692	0.624205
TRPM1	-0.208092	111	0.0284071	0.522982	0.446051	0.0100773	-0.220382	0.0252921	0.529794	-0.172188	0.0867034	0.736056
CHD5	-0.22609	94	0.0284409	0.522982	0.446051	0.0144173	-0.223703	0.0372639	0.570747	-0.123523	0.262955	0.857346
PAGE4	-0.274006	64	0.0284544	0.522982	0.446051	0.0159242	-0.27635	0.0341142	0.563437	-0.255422	0.0529756	0.68166
ZNF581	-0.252969	75	0.0285436	0.522982	0.446051	0.0102685	-0.258097	0.0309897	0.550486	-0.148141	0.231548	0.841679
CCDC89	-0.210776	108	0.0285514	0.522982	0.446051	0.00789816	-0.223263	0.0233952	0.526334	-0.250535	0.0138172	0.519946
ADAMTSL2	-0.216801	102	0.0286189	0.523049	0.446108	0.00880198	-0.225017	0.0292222	0.542811	-0.187049	0.072602	0.709315
PIAS3	-0.236104	86	0.0286306	0.523049	0.446108	0.018308	-0.239184	0.032616	0.557321	-0.300468	0.00713392	0.46893
CXCL10	-0.240324	83	0.0286379	0.523049	0.446108	0.00650074	-0.24453	0.0298653	0.54357	-0.175619	0.134479	0.782283
SH3D21	-0.207731	111	0.0286891	0.523346	0.446361	0.00678906	-0.212101	0.0332256	0.559255	-0.264176	0.00823583	0.477312
CEP170	-0.217749	101	0.0287109	0.523346	0.446361	0.0121843	-0.235069	0.020464	0.506122	-0.158235	0.136339	0.786355
PRSS54	-0.209535	109	0.0287624	0.523346	0.446361	0.00657916	-0.223609	0.024588	0.529794	-0.230988	0.0221165	0.565704
FOXD4L6	-0.246111	79	0.0287888	0.523346	0.446361	0.0166621	-0.250571	0.032503	0.557321	-0.284366	0.0147582	0.52285
DACT3	-0.36974	35	0.0288084	0.523346	0.446361	0.0296391	-0.298591	0.0969144	0.685805	-0.318478	0.0708655	0.706344
FOXN3	-0.241444	82	0.0288711	0.523773	0.446725	0.015375	-0.241379	0.0310067	0.550486	-0.340387	0.00300302	0.415116
TM4SF18	-0.242879	81	0.0289061	0.523905	0.446838	0.0120712	-0.211487	0.0666617	0.645343	-0.224669	0.0542984	0.68506
CPVL	-0.205484	113	0.0290071	0.524732	0.447543	0.0113522	-0.219356	0.0252678	0.529794	-0.222367	0.0246836	0.580802
CENPT	-0.205209	113	0.0292275	0.526214	0.448808	0.00467367	-0.218158	0.0268441	0.535049	-0.230827	0.0202135	0.557005
KDM2B	-0.212874	105	0.0292387	0.526214	0.448808	0.0090737	-0.225145	0.026608	0.533997	-0.132452	0.19829	0.824397
TRIM54	-0.243873	80	0.0292599	0.526214	0.448808	0.0145856	-0.254357	0.0298878	0.54357	-0.274787	0.0194913	0.555365
HIST1H2BB	-0.436197	25	0.0292697	0.526214	0.448808	0.0255341	-0.429297	0.0409307	0.57968	-0.548084	0.00827126	0.477312
CD55	-0.221425	97	0.0292835	0.526214	0.448808	0.0111348	-0.22195	0.0365803	0.570443	-0.18365	0.0867573	0.736056
PIGM	-0.219048	99	0.0293802	0.526952	0.449437	0.0144133	-0.220352	0.0358309	0.570443	-0.263173	0.011722	0.496362
C2orf15	-0.230925	89	0.0294607	0.527895	0.450241	0.00672431	-0.259092	0.018021	0.490266	-0.300658	0.0051758	0.451464
CNTN6	-0.210492	107	0.029539	0.528672	0.450904	0.0147271	-0.205248	0.0437187	0.589881	-0.241396	0.0166403	0.537954
BAG5	-0.222105	96	0.0296364	0.528672	0.450904	0.0150169	-0.237059	0.0244697	0.529689	-0.149333	0.169971	0.806745
IL18R1	-0.207425	110	0.0296795	0.528672	0.450904	0.00695756	-0.22459	0.0225638	0.520571	-0.168749	0.0949785	0.74523
AHCTF1	-0.205519	112	0.0297152	0.528672	0.450904	0.0128618	-0.220428	0.0252606	0.529794	-0.207086	0.0377214	0.631486
YTHDF1	-0.22198	96	0.0297313	0.528672	0.450904	0.0263291	-0.218217	0.0366444	0.570443	-0.163412	0.130447	0.778229
EPB41L4A	-0.2208	97	0.0297552	0.528672	0.450904	0.00672184	-0.212471	0.0443765	0.589881	-0.215118	0.0429189	0.647159
COG6	-0.219557	98	0.0298411	0.529058	0.451233	0.00747373	-0.209777	0.0459612	0.590582	-0.238976	0.02494	0.584068
HYDIN	-0.20006	118	0.0298494	0.529058	0.451233	0.0113319	-0.199538	0.0384149	0.575341	-0.164011	0.0929636	0.745176
FXYD1	-0.256154	72	0.0298651	0.529058	0.451233	0.01028	-0.22984	0.0593621	0.627812	-0.16278	0.18813	0.817068
ANKRD36C	-0.310289	49	0.0300202	0.52938	0.451508	0.00683678	-0.310113	0.0381558	0.57504	-0.340776	0.0272162	0.591925
WWOX	-0.214963	102	0.0300302	0.52938	0.451508	0.0140005	-0.208816	0.043406	0.589881	-0.268925	0.00953888	0.484027
CPXM2	-0.208845	108	0.0300746	0.52938	0.451508	0.00818019	-0.197213	0.0469489	0.593341	-0.198087	0.0517804	0.674535
ABCC13	-0.245651	78	0.0301708	0.529686	0.451769	0.00560782	-0.251816	0.0354723	0.570443	-0.271387	0.0230541	0.570692
GAB1	-0.215732	101	0.0302598	0.529686	0.451769	0.0126521	-0.210502	0.0406033	0.578723	-0.290073	0.00503451	0.451464
C1orf105	-0.225894	92	0.0303764	0.530324	0.452313	0.00568055	-0.224904	0.0397032	0.577995	-0.177594	0.106059	0.753807
LOC728537	-0.228351	90	0.030408	0.530324	0.452313	0.0210026	-0.187378	0.0918543	0.679387	-0.221853	0.0479504	0.660012
MGMT	-0.227091	91	0.0304082	0.530324	0.452313	0.0127612	-0.237684	0.0284962	0.542811	-0.182767	0.0981687	0.74795
COA6	-0.294811	54	0.0304592	0.530626	0.452571	0.0103225	-0.295522	0.0352563	0.569971	-0.110318	0.460394	0.920153
GOLGA5	-0.211273	105	0.0305051	0.530626	0.452571	0.00841321	-0.233005	0.0223354	0.518689	-0.16322	0.117994	0.764424
GPR150	-0.242077	80	0.0305096	0.530626	0.452571	0.0164664	-0.194235	0.0996345	0.688931	-0.295785	0.0122659	0.499766
SOWAHA	-0.241962	80	0.0305909	0.531348	0.453187	0.00650987	-0.262304	0.0239642	0.528749	-0.189617	0.113243	0.758895
CCDC175	-0.209062	107	0.0306877	0.531348	0.453187	0.00940765	-0.204043	0.0438772	0.589881	-0.223581	0.0294057	0.600274
PLEKHA1	-0.23734	83	0.0307382	0.531348	0.453187	0.0102074	-0.251997	0.0241343	0.529255	-0.161389	0.163684	0.802023
GNPAT	-0.208021	108	0.0307449	0.531348	0.453187	0.00897223	-0.209721	0.0372126	0.570443	-0.215938	0.0336448	0.619574
DNMBP	-0.204094	112	0.0308909	0.531348	0.453187	0.0135201	-0.206326	0.0365302	0.570443	-0.125963	0.209419	0.827533
BC071797	-0.260074	69	0.0309154	0.531348	0.453187	0.00818946	-0.295669	0.0167916	0.485802	-0.226796	0.0738633	0.713737
DCAF12L1	-0.238419	82	0.0310021	0.531348	0.453187	0.00932916	-0.242027	0.0351696	0.569971	-0.269268	0.0241897	0.580004
IQCA1	-0.206667	109	0.0310735	0.531348	0.453187	0.00947104	-0.231254	0.0206163	0.506122	-0.203242	0.0447311	0.649785
NRL	-0.245948	77	0.0310743	0.531348	0.453187	0.0184004	-0.245519	0.0362894	0.570443	-0.193335	0.111456	0.758895
DPAGT1	-0.234048	85	0.031091	0.531348	0.453187	0.0110507	-0.223961	0.0444387	0.589881	-0.291222	0.00968707	0.484027
SLAMF1	-0.217944	98	0.0310964	0.531348	0.453187	0.00567411	-0.211624	0.0440387	0.589881	-0.240837	0.0229955	0.570692
C14orf166B	-0.206574	109	0.0311518	0.531348	0.453187	0.0080845	-0.217269	0.0299025	0.54357	-0.187994	0.063778	0.694986
VGLL1	-0.211453	104	0.0311794	0.531348	0.453187	0.0135754	-0.212928	0.0362608	0.570443	-0.197529	0.0563475	0.686643
TEX12	-0.257801	70	0.0311894	0.531348	0.453187	0.0127843	-0.254684	0.0406203	0.578723	-0.212666	0.0942518	0.745176
VRTN	-0.206507	109	0.031207	0.531348	0.453187	0.00844311	-0.228112	0.0231538	0.526334	-0.207125	0.0407197	0.642474
XRCC2	-0.217762	98	0.0312402	0.531348	0.453187	0.00780709	-0.239525	0.0222113	0.518689	-0.200156	0.05575	0.686643
LRRC23	-0.211352	104	0.0312621	0.531348	0.453187	0.00973723	-0.204518	0.0456312	0.59035	-0.194465	0.0589739	0.690984
TFPI	-0.21433	101	0.0313774	0.531348	0.453187	0.00762417	-0.226777	0.0288194	0.542811	-0.207532	0.0483924	0.660619
FER	-0.218679	97	0.0314023	0.531348	0.453187	0.00379154	-0.22557	0.0297054	0.542811	-0.215542	0.0425005	0.647159
OIP5	-0.213187	102	0.0314487	0.531348	0.453187	0.00703317	-0.213027	0.0371715	0.570443	-0.251961	0.0159816	0.531995
CBX1	-0.555812	15	0.0314504	0.531348	0.453187	0.035464	-0.549077	0.0340159	0.563391	-0.528482	0.0428391	0.647159
IFNE	-0.213174	102	0.0314598	0.531348	0.453187	0.00559124	-0.229582	0.0260194	0.529999	-0.195485	0.0648245	0.695461
LRP5	-0.228213	89	0.0314769	0.531348	0.453187	0.0151578	-0.226731	0.0392824	0.577995	-0.238523	0.0309267	0.603667
ZCCHC6	-0.208056	107	0.031519	0.531585	0.453389	0.00668719	-0.182776	0.0687375	0.645343	-0.205268	0.0436982	0.647159
ZER1	-0.257224	70	0.0315824	0.531707	0.453492	0.0176049	-0.206341	0.0991278	0.688931	-0.265117	0.0342444	0.623318
FMR1	-0.255343	71	0.031624	0.531935	0.453687	0.0147249	-0.26691	0.0277873	0.540084	-0.328076	0.00763054	0.469175
SDR42E1	-0.204947	110	0.0317293	0.532751	0.454383	0.0111077	-0.209576	0.0336146	0.561414	-0.207256	0.0375618	0.631486
DICER1	-0.212796	102	0.0317687	0.532751	0.454383	0.00784329	-0.224572	0.0278284	0.540133	-0.248937	0.0161195	0.532479
FAM135B	-0.201141	114	0.0318803	0.532751	0.454383	0.0146358	-0.211409	0.0295974	0.542811	-0.110926	0.264642	0.857726
BCAR3	-0.203834	111	0.0318888	0.532751	0.454383	0.0150746	-0.222741	0.0230446	0.526245	-0.132689	0.188161	0.817068
CPEB1	-0.246399	76	0.0319001	0.532751	0.454383	0.0127697	-0.249518	0.033264	0.559255	-0.203036	0.0942862	0.745176
CDK5RAP2	-0.199297	116	0.0319681	0.532751	0.454383	0.0138007	-0.200897	0.0379962	0.57504	-0.206545	0.0354098	0.624205
AX746654	-0.240005	80	0.032006	0.532751	0.454383	0.00495203	-0.273803	0.0199492	0.501154	-0.212552	0.0773013	0.717586
LEMD1	-0.219057	96	0.0320075	0.532751	0.454383	0.0113909	-0.212298	0.0457889	0.59035	-0.218835	0.0429386	0.647159
CTTNBP2	-0.205495	109	0.0320623	0.532751	0.454383	0.00840238	-0.223647	0.024563	0.529794	-0.156037	0.126952	0.777152
FLJ11235	-0.247653	75	0.0321769	0.532751	0.454383	0.0065605	-0.253837	0.0367319	0.570443	-0.24419	0.0537685	0.683133
MAP7D2	-0.205346	109	0.0321905	0.532751	0.454383	0.00611007	-0.223463	0.0246843	0.529794	-0.234499	0.020781	0.558038
TAF3	-0.203471	111	0.0322022	0.532751	0.454383	0.0136082	-0.211594	0.030247	0.544821	-0.210886	0.0351967	0.624205
RPS6KB2	-0.219882	95	0.0322703	0.532751	0.454383	0.0159191	-0.22681	0.0335849	0.561414	-0.231025	0.0323444	0.614956
C11orf63	-0.198077	117	0.0322913	0.532751	0.454383	0.00815398	-0.203448	0.0355705	0.570443	-0.22872	0.0183614	0.551887
TULP2	-0.206084	108	0.0323718	0.532963	0.454564	0.00917006	-0.229709	0.0215025	0.511608	-0.267734	0.00801886	0.477312
ACBD3	-0.217435	97	0.0324036	0.532963	0.454564	0.0157803	-0.178991	0.0895839	0.675197	-0.0939775	0.386598	0.899199
TNFRSF10B	-0.2813	58	0.0324289	0.532963	0.454564	0.00699816	-0.292963	0.0369491	0.570443	-0.276665	0.0470884	0.659239
UROS	-0.21735	97	0.032473	0.532963	0.454564	0.00742784	-0.227357	0.0311572	0.550486	-0.203456	0.0544368	0.68506
C22orf31	-0.209732	104	0.0326119	0.533667	0.455164	0.00415876	-0.197594	0.0536404	0.613205	-0.161858	0.119098	0.764424
SRGN	-0.221672	93	0.0327236	0.533667	0.455164	0.0100823	-0.229383	0.0325832	0.557321	-0.17939	0.0983936	0.74795
MILR1	-0.233268	84	0.0327238	0.533667	0.455164	0.0112987	-0.233612	0.03826	0.57504	-0.205778	0.0745311	0.715102
NOTUM	-0.250258	73	0.0327281	0.533667	0.455164	0.0146271	-0.219957	0.0673043	0.645343	-0.280846	0.0213291	0.558516
MBOAT2	-0.206615	107	0.0327414	0.533667	0.455164	0.0171227	-0.225565	0.025536	0.529794	-0.0748503	0.463863	0.920769
TTC6	-0.203654	110	0.0328465	0.533743	0.455229	0.00635834	-0.194499	0.0501265	0.601767	-0.23687	0.0188575	0.555365
GPR179	-0.199131	115	0.0328814	0.533743	0.455229	0.0114267	-0.206399	0.0346486	0.568399	-0.122857	0.216334	0.832907
SSX3	-0.262902	66	0.03295	0.533743	0.455229	0.0066982	-0.276392	0.0325396	0.557321	-0.344386	0.00934807	0.484027
NABP1	-0.243307	77	0.0329865	0.533743	0.455229	0.0201087	-0.242033	0.0435229	0.589881	-0.270501	0.0245768	0.580761
PDGFA	-0.262703	66	0.0330879	0.533743	0.455229	0.0227671	-0.221642	0.0860363	0.670079	-0.235746	0.0650984	0.695461
MAGEB5	-0.234178	83	0.0331031	0.533743	0.455229	0.00854292	-0.263685	0.0222638	0.518689	-0.276217	0.0197168	0.556891
MOSPD1	-0.275519	60	0.0331144	0.533743	0.455229	0.0202316	-0.270646	0.0381484	0.57504	-0.189497	0.165851	0.804538
EPHA1-AS1	-0.251369	72	0.033177	0.533743	0.455229	0.0147544	-0.237422	0.0512353	0.604922	-0.255525	0.0383827	0.631493
AK096898	-0.229799	86	0.0332994	0.533743	0.455229	0.00962904	-0.256288	0.0235188	0.526334	-0.167851	0.13924	0.787477
CD84	-0.208923	104	0.0333035	0.533743	0.455229	0.010375	-0.194818	0.0558471	0.618744	-0.135689	0.192237	0.819333
SAMD13	-0.207918	105	0.0333087	0.533743	0.455229	0.0119944	-0.192587	0.0601246	0.630229	-0.154226	0.135632	0.78605
ANO5	-0.205951	107	0.033319	0.533743	0.455229	0.00865605	-0.21793	0.0277797	0.540084	-0.222793	0.0282742	0.596627
ZMYND8	-0.205947	107	0.0333222	0.533743	0.455229	0.00741558	-0.218968	0.0286124	0.542811	-0.186866	0.066841	0.698215
ZC2HC1C	-0.205947	107	0.0333225	0.533743	0.455229	0.0101049	-0.20483	0.044159	0.589881	-0.210698	0.0383075	0.631493
PIGP	-0.233891	83	0.0333248	0.533743	0.455229	0.00937044	-0.240621	0.032672	0.557321	-0.205071	0.0775722	0.717925
POTEC	-0.33304	41	0.0333611	0.533743	0.455229	0.0115321	-0.339023	0.0347477	0.569038	-0.31664	0.0436943	0.647159
ZNF33B	-0.262303	66	0.033366	0.533743	0.455229	0.0170953	-0.253027	0.0531694	0.612306	-0.284744	0.0261366	0.591925
LRCH4	-0.207811	105	0.0334016	0.533863	0.455331	0.01006	-0.215343	0.0351112	0.569971	-0.298008	0.00318869	0.416184
TMEM202	-0.228292	87	0.033442	0.534057	0.455497	0.00781105	-0.199104	0.0766301	0.654263	-0.188751	0.100175	0.74945
E2F2	-0.208692	104	0.0335038	0.534468	0.455847	0.0104054	-0.193094	0.0555022	0.617948	-0.269942	0.00815589	0.477312
TMEM179	-0.270339	62	0.0335806	0.534468	0.455847	0.0120873	-0.261402	0.0455189	0.59035	-0.202411	0.134634	0.782283
MGC13053	-0.22547	89	0.0336324	0.534822	0.456149	0.00462494	-0.254276	0.0181509	0.490266	-0.252802	0.0227875	0.570692
SCAND3	-0.25247	71	0.0336593	0.534822	0.456149	0.0102487	-0.210028	0.10133	0.689398	-0.161339	0.206502	0.826745
RAD9A	-0.211554	101	0.0336927	0.534903	0.456219	0.0114542	-0.161794	0.121283	0.713316	-0.17092	0.103312	0.752111
KIAA0040	-0.229147	86	0.0338167	0.535838	0.457016	0.00734417	-0.237351	0.0328799	0.55856	-0.247337	0.0301063	0.600909
CATSPERD	-0.216842	96	0.0338298	0.535838	0.457016	0.00490273	-0.235297	0.0291953	0.542811	-0.217644	0.045401	0.653571
FAM90A27P	-0.300674	50	0.0338648	0.535838	0.457016	0.00664337	-0.306504	0.0382879	0.57504	-0.289662	0.0564954	0.686643
C6orf165	-0.203376	109	0.0339174	0.536019	0.45717	0.00702229	-0.192563	0.0537009	0.613328	-0.235881	0.019375	0.555365
FBXL5	-0.210235	102	0.0339328	0.536019	0.45717	0.0126034	-0.197556	0.0549838	0.61628	-0.280461	0.00677149	0.46893
MITF	-0.235868	81	0.0340205	0.536956	0.45797	0.00968136	-0.228402	0.0442942	0.589881	-0.253529	0.028182	0.596627
GOLGB1	-0.201274	111	0.0341512	0.537684	0.45859	0.0110403	-0.213354	0.0313133	0.550486	-0.0945063	0.352129	0.886727
PPFIBP1	-0.207951	104	0.0341513	0.537684	0.45859	0.00760825	-0.218591	0.0342909	0.564097	-0.213965	0.0373388	0.630097
ZNF649	-0.244898	75	0.0342074	0.53807	0.458919	0.00887628	-0.256893	0.0358566	0.570443	-0.201917	0.0986905	0.74871
NLRP9	-0.261061	66	0.0342418	0.53807	0.458919	0.015849	-0.256289	0.050074	0.601767	-0.31824	0.0124381	0.500376
DCAF17	-0.211946	100	0.0342661	0.53807	0.458919	0.0082821	-0.191682	0.0671863	0.645343	-0.211956	0.0449057	0.651322
FGFR1OP	-0.22338	90	0.0343135	0.53807	0.458919	0.014499	-0.267463	0.014507	0.479322	-0.174789	0.114005	0.759036
ZNF645	-0.228432	86	0.0343921	0.538213	0.459041	0.0059656	-0.245638	0.0301803	0.544655	-0.213235	0.0608678	0.692403
SPHKAP	-0.194923	118	0.0344127	0.538213	0.459041	0.00993056	-0.233883	0.0148429	0.479322	-0.157988	0.105776	0.753807
RRN3	-0.21277	99	0.0344788	0.538358	0.459165	0.0059269	-0.222094	0.0314434	0.550486	-0.232296	0.0275823	0.591925
RNF168	-0.201656	110	0.0346367	0.539398	0.460052	0.00663155	-0.207739	0.0352371	0.569971	-0.242724	0.0154899	0.531131
DLEC1	-0.205348	106	0.0347137	0.539398	0.460052	0.0100627	-0.182862	0.0730083	0.647513	-0.209412	0.0416786	0.64452
MKL2	-0.206317	105	0.0347221	0.539398	0.460052	0.0115404	-0.218463	0.0289908	0.542811	-0.150882	0.146612	0.794049
MBD4	-0.202406	109	0.0347969	0.539398	0.460052	0.00689426	-0.234149	0.0184363	0.490266	-0.142822	0.162846	0.801396
RPL28	-0.374247	32	0.0348409	0.539398	0.460052	0.0153854	-0.33181	0.0786693	0.656365	-0.348906	0.0687994	0.702991
RGAG1	-0.205204	106	0.034844	0.539398	0.460052	0.0138376	-0.217246	0.0334911	0.561414	-0.246614	0.0159868	0.531995
AMZ2	-0.216749	95	0.034876	0.539398	0.460052	0.0094755	-0.218445	0.0420858	0.584034	-0.166589	0.123035	0.769801
LSM14A	-0.250806	71	0.0348871	0.539398	0.460052	0.0158086	-0.265494	0.0286579	0.542811	-0.276158	0.0226338	0.570692
SAMD12	-0.212268	99	0.034917	0.539419	0.46007	0.0147926	-0.212895	0.0393831	0.577995	-0.168485	0.114491	0.75941
CNST	-0.207942	103	0.035055	0.539967	0.460538	0.0118382	-0.225124	0.0274366	0.53774	-0.120205	0.256394	0.852795
CASS4	-0.200252	111	0.0350914	0.539967	0.460538	0.01455	-0.216106	0.0291454	0.542811	-0.103322	0.306321	0.874273
POLG	-0.200223	111	0.0351188	0.539967	0.460538	0.00818878	-0.231496	0.0192284	0.495736	-0.240001	0.0167232	0.537954
PRUNE	-0.213076	98	0.0351579	0.539967	0.460538	0.0137981	-0.203892	0.0525581	0.609252	-0.129849	0.227899	0.839224
COX4I2	-0.226164	87	0.0351715	0.539967	0.460538	0.0103198	-0.214528	0.0529398	0.612031	-0.230073	0.0400649	0.641149
ANKRD36BP2	-0.352067	36	0.0352216	0.539967	0.460538	0.00810679	-0.390558	0.0246293	0.529794	-0.208612	0.260074	0.855201
COX20	-0.235713	80	0.0353039	0.539967	0.460538	0.00865602	-0.251662	0.0272532	0.53774	-0.233354	0.0454	0.653571
TBX22	-0.213958	97	0.0353471	0.539967	0.460538	0.0108966	-0.236139	0.0276696	0.539282	-0.15406	0.156699	0.79713
NPS	-0.21968	92	0.0353727	0.539967	0.460538	0.00635042	-0.207784	0.0548928	0.615735	-0.158377	0.15018	0.794593
ZNF487P	-0.333597	40	0.0354108	0.539967	0.460538	0.00544917	-0.391711	0.0199604	0.501154	-0.310853	0.064993	0.695461
FAM117A	-0.20942	101	0.0355697	0.540563	0.461045	0.00902947	-0.182949	0.0759694	0.654014	-0.151076	0.152869	0.795788
EEF2K	-0.204387	106	0.0355904	0.540563	0.461045	0.010369	-0.21078	0.0362433	0.570443	-0.178215	0.0807284	0.72799
CPSF4L	-0.215688	95	0.0357979	0.542435	0.462642	0.0128181	-0.215695	0.0400344	0.577995	-0.135781	0.218127	0.834381
CLPTM1L	-0.224091	88	0.0358282	0.542435	0.462642	0.0116826	-0.225805	0.0377176	0.574284	-0.182627	0.100547	0.749452
NANOG	-0.23801	78	0.0358731	0.54268	0.462852	0.00744705	-0.226316	0.0493145	0.60003	-0.279607	0.0199772	0.556891
KDM8	-0.198489	112	0.0359086	0.542707	0.462874	0.00868351	-0.224662	0.0232009	0.526334	-0.142426	0.157487	0.797246
OXLD1	-0.230566	83	0.0359894	0.542707	0.462874	0.00785927	-0.241563	0.0331183	0.559255	-0.213429	0.0678768	0.700188
C10orf62	-0.199215	111	0.0360679	0.542922	0.463058	0.0105291	-0.221581	0.0252093	0.529794	-0.223485	0.02467	0.580802
ANKS3	-0.197417	113	0.0360897	0.542922	0.463058	0.01034	-0.167406	0.0893967	0.67516	-0.172999	0.0836221	0.730309
C20orf62	-0.288241	53	0.036346	0.544522	0.464422	0.00914118	-0.238268	0.102925	0.691155	-0.224691	0.12891	0.778229
CCL1	-0.219627	91	0.0364602	0.544603	0.464492	0.00908607	-0.206575	0.0578489	0.62278	-0.157451	0.165805	0.804538
TSNAXIP1	-0.196069	114	0.0365543	0.545149	0.464957	0.00922223	-0.190273	0.0518739	0.60753	-0.173709	0.079292	0.723352
IQCH	-0.197662	112	0.0367035	0.546795	0.466361	0.0079952	-0.221637	0.0237501	0.528321	-0.249972	0.0121332	0.499766
LOC388813	-0.212416	97	0.0367224	0.546795	0.466361	0.0145922	-0.188146	0.0774494	0.655429	-0.163033	0.131352	0.778512
CATSPER4	-0.211203	98	0.036835	0.547652	0.467092	0.00548581	-0.24655	0.0178272	0.490266	-0.216492	0.0427721	0.647159
PRC1	-0.224065	87	0.0369499	0.547867	0.467275	0.0075639	-0.243586	0.0284285	0.542811	-0.213534	0.0622271	0.692563
BC037321	-0.241292	75	0.0370263	0.547867	0.467275	0.00490618	-0.249554	0.0401389	0.577995	-0.261562	0.0325119	0.614956
ANKRD30A	-0.376109	31	0.0370425	0.547867	0.467275	0.0101254	-0.386437	0.0422259	0.584034	-0.473874	0.0144645	0.521203
ZNF554	-0.263308	63	0.0370658	0.547867	0.467275	0.0118824	-0.243599	0.0629988	0.635973	-0.217423	0.110812	0.758895
CNTN4	-0.212028	97	0.0370759	0.547867	0.467275	0.0119052	-0.196192	0.0653792	0.645343	-0.232018	0.0286799	0.599176
MIS18A	-0.222421	88	0.0372674	0.548683	0.467971	0.0086678	-0.233928	0.0355633	0.570443	-0.350885	0.00175543	0.408751
ANKRD20A8P	-0.231811	81	0.0373128	0.548683	0.467971	0.00641475	-0.257238	0.0258827	0.529827	-0.224605	0.056083	0.686643
PKDREJ	-0.201385	107	0.0375226	0.55059	0.469598	0.0156315	-0.208081	0.0397794	0.577995	-0.169966	0.0942906	0.745176
SPAG17	-0.195074	114	0.0375353	0.55059	0.469598	0.0114462	-0.192901	0.0497732	0.601767	-0.171036	0.0856554	0.734278
BNC1	-0.199486	109	0.0375587	0.55059	0.469598	0.0200724	-0.201274	0.0446398	0.589881	-0.156747	0.117497	0.763962
SPATA1	-0.206994	101	0.0378092	0.552565	0.471282	0.00973717	-0.220984	0.0352904	0.570036	-0.200844	0.0562698	0.686643
CPA5	-0.197404	111	0.0378276	0.552565	0.471282	0.0111147	-0.19116	0.0555021	0.617948	-0.18075	0.0704771	0.705595
GPR126	-0.196506	112	0.0378393	0.552565	0.471282	0.0164581	-0.214065	0.0291081	0.542811	-0.089861	0.373943	0.895496
EIF3K	-0.342669	37	0.0378791	0.552719	0.471414	0.0398694	-0.345748	0.0419101	0.583999	-0.336706	0.0515159	0.674221
POGK	-0.222897	87	0.0379719	0.553648	0.472206	0.00954038	-0.211352	0.0566397	0.620583	-0.260857	0.0219405	0.56488
FUT11	-0.206696	101	0.0380916	0.554538	0.472965	0.0107507	-0.206757	0.0455632	0.59035	-0.229529	0.0295396	0.600274
PNMA6C	-0.31731	43	0.03814	0.554817	0.473203	0.00811989	-0.295414	0.0607695	0.631692	-0.363918	0.0247013	0.580802
GNRH1	-0.229119	82	0.038402	0.556442	0.474589	0.0141418	-0.218773	0.0543127	0.615316	-0.145073	0.217482	0.833771
C17orf82	-0.227724	83	0.0384068	0.556442	0.474589	0.00776732	-0.2496	0.0308036	0.550486	-0.217509	0.0645273	0.695461
WASL	-0.237889	76	0.0385174	0.55731	0.47533	0.0162221	-0.224273	0.0564566	0.619925	-0.151364	0.214412	0.831288
AX746903	-0.223434	86	0.0386454	0.557884	0.475819	0.0109776	-0.202385	0.0718007	0.646512	-0.245792	0.0323383	0.614956
DDX17	-0.267593	60	0.0387316	0.558278	0.476155	0.0171837	-0.257495	0.0531473	0.612306	-0.190078	0.168609	0.805909
LOC100505624	-0.213414	94	0.0388951	0.558795	0.476596	0.0118731	-0.203452	0.0544416	0.615475	-0.122769	0.260116	0.855201
RP1	-0.191196	117	0.0389247	0.558795	0.476596	0.00999422	-0.214932	0.0262016	0.53112	-0.124238	0.206689	0.826745
MAPKAPK2	-0.276744	56	0.0389445	0.558795	0.476596	0.0279027	-0.296103	0.0297053	0.542811	-0.21655	0.119361	0.76456
ADAMTSL4	-0.197113	110	0.0390163	0.559136	0.476887	0.00942844	-0.221936	0.0257101	0.529827	-0.161331	0.112508	0.758895
ZNF747	-0.215587	92	0.0390274	0.559136	0.476887	0.010019	-0.20695	0.0558958	0.618744	-0.147518	0.183232	0.8164
PCIF1	-0.222802	86	0.039213	0.560947	0.478431	0.0160548	-0.243858	0.0292701	0.542811	-0.220659	0.0537995	0.683133
RELA	-0.209708	97	0.0392469	0.561009	0.478484	0.00880728	-0.211504	0.0418335	0.583852	-0.175928	0.103112	0.752111
GAS6	-0.212954	94	0.0393277	0.561068	0.478534	0.0160582	-0.191482	0.079171	0.656365	-0.14823	0.170631	0.807123
TSPAN32	-0.225269	84	0.0393749	0.561068	0.478534	0.00614025	-0.238825	0.0352245	0.569971	-0.18721	0.107768	0.753807
RPL35	-0.423136	24	0.0393797	0.561068	0.478534	0.0209459	-0.422058	0.0448462	0.589881	-0.361622	0.0899817	0.738904
IL13RA2	-0.203333	103	0.0393992	0.561068	0.478534	0.0145096	-0.226052	0.0267885	0.535049	-0.166642	0.112368	0.758895
ITGB7	-0.193958	113	0.0395451	0.5623	0.479586	0.0140369	-0.186208	0.058412	0.623335	-0.0952052	0.343616	0.884362
AGBL1	-0.195656	111	0.0395941	0.562574	0.479819	0.00929321	-0.23593	0.0169765	0.486605	-0.150384	0.137343	0.78666
C18orf25	-0.233507	78	0.0396363	0.562752	0.47997	0.0115253	-0.239492	0.0385044	0.576117	-0.305575	0.009558	0.484027
TMEM14E	-0.371276	31	0.0397456	0.563038	0.480214	0.0149822	-0.374809	0.0451418	0.589881	-0.327675	0.0771184	0.717422
ADM	-0.212354	94	0.0398984	0.564392	0.481369	0.00648636	-0.221372	0.0370845	0.570443	-0.240995	0.0272224	0.591925
ZCCHC5	-0.21461	92	0.0399444	0.564392	0.481369	0.0111483	-0.249147	0.0222879	0.518689	-0.135812	0.229676	0.841612
C12orf40	-0.200822	105	0.0399604	0.564392	0.481369	0.00445527	-0.198559	0.0537374	0.613328	-0.176676	0.0850769	0.733136
C11orf65	-0.203717	102	0.040007	0.564629	0.481572	0.00836044	-0.212136	0.0369771	0.570443	-0.173284	0.0966967	0.747565
TRMT12	-0.198773	107	0.0401208	0.564751	0.481676	0.00682079	-0.144292	0.152063	0.747618	-0.207336	0.0426686	0.647159
NMNAT1	-0.21801	89	0.0401323	0.564751	0.481676	0.00655763	-0.219648	0.0409398	0.57968	-0.163033	0.148471	0.794589
ASTE1	-0.19254	114	0.0401349	0.564751	0.481676	0.0174937	-0.213506	0.0295414	0.542811	-0.208528	0.0354433	0.624205
LIM2	-0.216754	90	0.0401666	0.564777	0.481698	0.0112558	-0.22097	0.0421261	0.584034	-0.121665	0.282341	0.865773
TTC23L	-0.20554	100	0.0402161	0.564777	0.481698	0.00713244	-0.182254	0.0803777	0.658646	-0.220032	0.0382753	0.631493
KANSL2	-0.20654	99	0.0402558	0.564777	0.481698	0.00760279	-0.227835	0.028062	0.54079	-0.199604	0.057839	0.689406
SLC7A3	-0.206494	99	0.0403006	0.564777	0.481698	0.0144995	-0.200666	0.0537747	0.613328	-0.239976	0.0251692	0.585191
LOC253044	-0.231248	79	0.0403156	0.564777	0.481698	0.00840044	-0.215165	0.0656167	0.645343	-0.23753	0.047707	0.659239
GCNT3	-0.193992	112	0.0404128	0.565302	0.482145	0.0107512	-0.20699	0.0350079	0.569971	-0.161253	0.107188	0.753807
CATSPER3	-0.199331	106	0.0405101	0.565422	0.482248	0.00846233	-0.207464	0.0393508	0.577995	-0.195833	0.0571802	0.687068
ARFGAP3	-0.206239	99	0.0405541	0.565422	0.482248	0.0128378	-0.230549	0.0270364	0.536506	-0.173907	0.0992245	0.749265
C11orf35	-0.209431	96	0.0405707	0.565422	0.482248	0.0058256	-0.229752	0.0333363	0.559973	-0.200193	0.0645874	0.695461
METTL8	-0.20016	105	0.0406344	0.565478	0.482295	0.00694941	-0.200099	0.048212	0.596927	-0.175635	0.0886653	0.738904
NDNF	-0.206067	99	0.040725	0.565996	0.482737	0.00508882	-0.188627	0.0717486	0.646512	-0.170912	0.111359	0.758895
COX6C	-0.235246	76	0.0407912	0.565996	0.482737	0.0167769	-0.245664	0.0361758	0.570443	-0.254726	0.0333321	0.619574
2019-09-09	-0.213645	92	0.0408681	0.566649	0.483294	0.0141796	-0.225102	0.0371793	0.570443	-0.163404	0.147537	0.794568
KIAA1586	-0.252334	66	0.0409523	0.567303	0.483852	0.0205852	-0.238001	0.0670741	0.645343	-0.210642	0.106205	0.753807
PHF19	-0.233496	77	0.0409785	0.567303	0.483852	0.00919001	-0.234221	0.0431173	0.589821	-0.182804	0.132724	0.781394
ZHX1	-0.20168	103	0.0410633	0.567303	0.483852	0.0132934	-0.202871	0.0462702	0.590582	-0.156301	0.134618	0.782283
AK124326	-0.248442	68	0.0410651	0.567303	0.483852	0.00839334	-0.247391	0.043553	0.589881	-0.237121	0.0635027	0.694934
CBY3	-0.234839	76	0.041151	0.567754	0.484237	0.00926412	-0.253471	0.0342415	0.564097	-0.238962	0.049701	0.667062
HIRIP3	-0.197627	107	0.0413075	0.567754	0.484237	0.00688055	-0.203321	0.0457775	0.59035	-0.199999	0.0507362	0.672975
CSF3R	-0.19009	115	0.0418696	0.572985	0.488698	0.0039762	-0.189319	0.0519359	0.60753	-0.187557	0.0565789	0.686643
ESPL1	-0.190771	114	0.0420379	0.574457	0.489954	0.00679132	-0.204674	0.0371448	0.570443	-0.150704	0.130554	0.778229
TMEM159	-0.205738	98	0.0421166	0.574541	0.490025	0.0116053	-0.207509	0.0471667	0.59344	-0.155561	0.147826	0.794568
CTSK	-0.213474	91	0.0421797	0.574541	0.490025	0.0130983	-0.219291	0.0412765	0.582112	-0.127121	0.255088	0.852606
TMEM92	-0.200533	103	0.0422516	0.574541	0.490025	0.00953664	-0.220604	0.032629	0.557321	-0.208992	0.0432259	0.647159
PQBP1	-0.236752	74	0.042263	0.574541	0.490025	0.012493	-0.234861	0.0470494	0.59344	-0.256301	0.0363005	0.625201
TAF1B	-0.194848	109	0.0423237	0.574541	0.490025	0.00919236	-0.202081	0.0437733	0.589881	-0.153601	0.131034	0.778275
SNCAIP	-0.200352	103	0.0424417	0.574541	0.490025	0.00858759	-0.182131	0.0741806	0.648069	-0.178804	0.0881287	0.738904
GALNT15	-0.196419	107	0.0425899	0.574541	0.490025	0.0109895	-0.198257	0.0503549	0.602572	-0.203591	0.0466423	0.659239
CATSPERB	-0.192826	111	0.0425986	0.574541	0.490025	0.00404075	-0.221551	0.0252298	0.529794	-0.19197	0.0556962	0.686643
RAPGEF1	-0.197327	106	0.0426114	0.574541	0.490025	0.013813	-0.207115	0.0386788	0.577423	-0.151915	0.139528	0.787477
C2orf88	-0.223107	83	0.0426209	0.574541	0.490025	0.00799581	-0.210776	0.0605575	0.631296	-0.213812	0.0636554	0.694934
SURF1	-0.202033	101	0.0427569	0.574541	0.490025	0.0132928	-0.21003	0.0421747	0.584034	-0.108469	0.306095	0.874273
BC073928	-0.214032	90	0.0428018	0.574541	0.490025	0.00778124	-0.189399	0.0883405	0.67317	-0.14462	0.194867	0.820768
AK307192	-0.244597	69	0.0428122	0.574541	0.490025	0.0115021	-0.268699	0.0318028	0.552347	-0.302399	0.0178508	0.547619
TTC16	-0.19528	108	0.0428327	0.574541	0.490025	0.0103426	-0.173511	0.0875224	0.672407	-0.19687	0.0545411	0.68506
C9	-0.194318	109	0.0428986	0.574585	0.490063	0.00871561	-0.192316	0.0540141	0.614055	-0.0888144	0.386988	0.899487
CCDC85C	-0.306625	44	0.042927	0.574585	0.490063	0.0240929	-0.226013	0.150086	0.745272	-0.261761	0.11758	0.763962
ADAT1	-0.194154	109	0.0430778	0.574989	0.490408	0.00944456	-0.187024	0.0598065	0.629348	-0.133964	0.186182	0.816495
PNCK	-0.210221	93	0.0431211	0.574989	0.490408	0.00909261	-0.202079	0.0636429	0.639164	-0.185216	0.0877673	0.738098
C9orf142	-0.213608	90	0.0432249	0.574989	0.490408	0.0107068	-0.200272	0.0677644	0.645343	-0.171058	0.129237	0.778229
ADIG	-0.226479	80	0.0433691	0.576025	0.491291	0.00876784	-0.200476	0.0824904	0.664003	-0.165458	0.164839	0.803317
GCG	-0.232328	76	0.0434301	0.576431	0.491637	0.0166253	-0.24477	0.0382438	0.57504	-0.193286	0.108893	0.756688
GEMIN5	-0.190315	113	0.0434798	0.576517	0.491711	0.00750144	-0.207533	0.0345216	0.566807	-0.20873	0.0343539	0.623318
DUSP27	-0.196507	106	0.0434975	0.576517	0.491711	0.0135271	-0.188377	0.0646277	0.643728	-0.268914	0.00741801	0.469175
LHB	-0.2182	86	0.0435617	0.576561	0.491748	0.00905078	-0.236179	0.0373651	0.57091	-0.268043	0.0169255	0.537954
FAM227B	-0.198198	104	0.0437109	0.577136	0.492239	0.00685361	-0.204118	0.0472447	0.59344	-0.218289	0.0355487	0.624205
PPP1R15A	-0.191783	111	0.043753	0.577136	0.492239	0.00777799	-0.207344	0.0374786	0.572118	-0.16109	0.111185	0.758895
ARL16	-0.219136	85	0.0439066	0.577136	0.492239	0.0114799	-0.210812	0.0621975	0.634051	-0.114394	0.32186	0.877205
TMEM89	-0.21291	90	0.0439289	0.577136	0.492239	0.0109541	-0.213471	0.0512097	0.604922	-0.224466	0.0481871	0.660619
SFXN4	-0.220242	84	0.0441042	0.577136	0.492239	0.00581624	-0.232637	0.0417487	0.583711	-0.204679	0.0845861	0.731739
GNG7	-0.397893	26	0.0441067	0.577136	0.492239	0.0262539	-0.400225	0.0427681	0.587322	-0.524329	0.0102181	0.484027
ZNF668	-0.210269	92	0.0442406	0.577136	0.492239	0.00672828	-0.219128	0.0402465	0.578516	-0.180808	0.0997846	0.749265
NR0B1	-0.1977	104	0.0442528	0.577136	0.492239	0.00705183	-0.190864	0.062498	0.635419	-0.212707	0.040656	0.642474
RPSA	-0.405537	25	0.0443001	0.577136	0.492239	0.0615099	-0.380706	0.0731058	0.647513	-0.415243	0.0390006	0.635532
DNMT3L	-0.209023	93	0.0443515	0.577136	0.492239	0.0130763	-0.218501	0.0445372	0.589881	-0.161054	0.138505	0.787477
NSD1	-0.195699	106	0.0443846	0.577136	0.492239	0.0079615	-0.195807	0.0533258	0.612826	-0.302019	0.00293434	0.415116
IFNA1	-0.213656	89	0.0443872	0.577136	0.492239	0.0120338	-0.222142	0.0435484	0.589881	-0.194953	0.0851198	0.733136
NPHP3	-0.197478	104	0.0444971	0.577136	0.492239	0.00724715	-0.179385	0.0787264	0.656365	-0.204781	0.0477154	0.659239
ENPP6	-0.198384	103	0.0445562	0.577136	0.492239	0.0129056	-0.192946	0.0582919	0.623335	-0.136277	0.19274	0.819333
SPATA9	-0.212282	90	0.04457	0.577136	0.492239	0.00728542	-0.181024	0.0973224	0.685805	-0.205678	0.0637714	0.694986
NRK	-0.195505	106	0.0446001	0.577136	0.492239	0.00615158	-0.191839	0.0597787	0.629348	-0.241989	0.0181461	0.549909
ARNTL2	-0.21711	86	0.044648	0.577224	0.492314	0.0134493	-0.186724	0.0994117	0.688931	-0.198293	0.0818012	0.72799
FP15737	-0.245674	67	0.0450799	0.580031	0.494708	0.0102471	-0.273735	0.0359172	0.570443	-0.202456	0.108629	0.756208
RBM5	-0.238588	71	0.0450989	0.580031	0.494708	0.013477	-0.204055	0.103011	0.691155	-0.263665	0.0338207	0.619574
DQX1	-0.193199	108	0.0451412	0.580031	0.494708	0.00836382	-0.201456	0.0444433	0.589881	-0.170088	0.0975644	0.74795
CCP110	-0.189655	112	0.0451964	0.580031	0.494708	0.0101608	-0.200446	0.0413302	0.582112	-0.201701	0.0431059	0.647159
DDX55	-0.194958	106	0.0452122	0.580031	0.494708	0.00932524	-0.196191	0.0528511	0.611568	-0.218886	0.0321453	0.614956
PDGFD	-0.212851	89	0.0452137	0.580031	0.494708	0.01039	-0.217014	0.0460446	0.590582	-0.25351	0.0232699	0.571673
EIF3H	-0.249053	65	0.0454341	0.580031	0.494708	0.0162975	-0.216297	0.0940782	0.682112	-0.332204	0.00890551	0.484027
FAHD1	-0.222948	81	0.045435	0.580031	0.494708	0.0130709	-0.20464	0.0742155	0.648069	-0.0826886	0.486748	0.924702
LRRIQ1	-0.186132	116	0.0454456	0.580031	0.494708	0.00480273	-0.218816	0.0242263	0.529593	-0.208484	0.0336848	0.619574
GPR125	-0.19757	103	0.0454558	0.580031	0.494708	0.0120569	-0.208415	0.0394553	0.577995	-0.195693	0.0587242	0.690984
HIST1H2AH	-0.430309	22	0.0456062	0.580031	0.494708	0.0492931	-0.41224	0.0708888	0.645343	-0.441564	0.039654	0.638994
GOLGA6A	-0.213682	88	0.0456077	0.580031	0.494708	0.0111366	-0.224462	0.0453199	0.59035	-0.109291	0.331427	0.879168
RNF20	-0.217361	85	0.0456888	0.580031	0.494708	0.0265002	-0.0735184	0.519639	0.90842	-0.233866	0.0393246	0.636729
NUP205	-0.202286	98	0.0457669	0.580031	0.494708	0.00776148	-0.205978	0.048857	0.60003	-0.261965	0.0131417	0.507646
TMEM182	-0.22261	81	0.0457715	0.580031	0.494708	0.017944	-0.232331	0.0420262	0.584034	-0.154341	0.192317	0.819333
TRAF2	-0.207654	93	0.0457939	0.580031	0.494708	0.0135844	-0.194641	0.0725214	0.647513	-0.202379	0.0616629	0.692563
BCCIP	-0.202225	98	0.0458341	0.580031	0.494708	0.00517874	-0.197106	0.0611109	0.633179	-0.152859	0.152689	0.795788
ERICH1	-0.219834	83	0.045835	0.580031	0.494708	0.00798706	-0.223495	0.0539214	0.613671	-0.218296	0.0599025	0.692403
HSF4	-0.202203	98	0.0458583	0.580031	0.494708	0.0194116	-0.191841	0.0654498	0.645343	-0.127387	0.231506	0.841679
FAM46A	-0.231254	75	0.0459087	0.580031	0.494708	0.0101147	-0.247159	0.0391348	0.577995	-0.288519	0.0178954	0.547752
SETDB2	-0.190748	110	0.0459234	0.580031	0.494708	0.00370643	-0.198323	0.0446228	0.589881	-0.18318	0.0695452	0.702991
OVCH1	-0.244701	67	0.0459644	0.580031	0.494708	0.009331	-0.224894	0.0868053	0.672407	-0.161226	0.222502	0.835785
GCGR	-0.204145	96	0.046036	0.580031	0.494708	0.0116094	-0.211368	0.0467703	0.592646	-0.203137	0.0606743	0.692403
GMNN	-0.209697	91	0.0460461	0.580031	0.494708	0.0110446	-0.250252	0.0208921	0.508103	-0.239363	0.0303232	0.601552
RECQL5	-0.185615	116	0.0460591	0.580031	0.494708	0.0160236	-0.186822	0.0517559	0.60753	-0.126584	0.200382	0.825179
YKT6	-0.232659	74	0.0460643	0.580031	0.494708	0.019398	-0.239711	0.0425513	0.586138	-0.0809702	0.511569	0.931008
CCDC81	-0.187216	114	0.0460901	0.580031	0.494708	0.0150608	-0.195492	0.0467264	0.592646	-0.204546	0.0391874	0.635595
NEDD9	-0.191315	109	0.0462828	0.580669	0.495252	0.0168255	-0.185325	0.0635372	0.638441	-0.0608165	0.549849	0.937101
FAM212B	-0.198766	101	0.0463007	0.580669	0.495252	0.00712684	-0.215739	0.0388855	0.577596	-0.172316	0.100484	0.749452
ZBTB32	-0.187831	113	0.0463446	0.580669	0.495252	0.00864749	-0.207968	0.0341368	0.563437	-0.144729	0.144674	0.790626
NFATC1	-0.200724	99	0.0463554	0.580669	0.495252	0.0171921	-0.191859	0.0700547	0.645343	-0.152399	0.151583	0.795614
LGALS12	-0.198635	101	0.0464485	0.580793	0.495357	0.0135152	-0.185536	0.0733985	0.647513	-0.146958	0.166912	0.804634
USP53	-0.190975	109	0.0466787	0.580793	0.495357	0.00485612	-0.196012	0.0506449	0.603372	-0.150338	0.141609	0.789172
ADAM33	-0.190063	110	0.0467239	0.580793	0.495357	0.00832256	-0.204965	0.0397709	0.577995	-0.126261	0.2154	0.83257
TUBA4B	-0.212615	88	0.0467248	0.580793	0.495357	0.0117584	-0.195372	0.080481	0.658991	-0.121633	0.282468	0.86584
PROP1	-0.409751	24	0.0467565	0.580793	0.495357	0.0112201	-0.400393	0.0893744	0.67516	-0.457948	0.0368329	0.628873
FOXS1	-0.198342	101	0.046778	0.580793	0.495357	0.00900012	-0.20428	0.0470661	0.59344	-0.173018	0.0990858	0.749265
CXorf61	-0.221596	81	0.0467946	0.580793	0.495357	0.0105919	-0.211631	0.0702818	0.645343	-0.34337	0.00239165	0.410762
EGF	-0.188234	112	0.0468627	0.581178	0.495686	0.016091	-0.214336	0.0289	0.542811	-0.200652	0.044226	0.648461
ANKRD61	-0.188953	111	0.0470177	0.581372	0.495852	0.0105121	-0.182051	0.0684442	0.645343	-0.292791	0.00311489	0.415116
CAPZA1	-0.266334	56	0.0472443	0.581799	0.496216	0.0241738	-0.282056	0.0427826	0.587322	-0.246403	0.0782538	0.720374
PLA2G7	-0.187776	112	0.0474109	0.583092	0.497319	0.00664215	-0.230439	0.0191925	0.49568	-0.186574	0.0630784	0.694934
NAGK	-0.20608	93	0.0475003	0.583435	0.497611	0.00792038	-0.206776	0.056107	0.618948	-0.196798	0.0763785	0.715224
TRIP11	-0.189209	110	0.0477378	0.584835	0.498805	0.0116185	-0.204967	0.036869	0.570443	-0.231205	0.0213052	0.558516
C4orf22	-0.205792	93	0.0478177	0.585254	0.499162	0.00563877	-0.208215	0.0515712	0.60677	-0.161694	0.144182	0.790036
CGB1	-0.229162	75	0.0479656	0.585901	0.499715	0.0137605	-0.239801	0.048881	0.60003	-0.265755	0.0297344	0.600274
PGBD1	-0.20332	95	0.0481344	0.585901	0.499715	0.011018	-0.197107	0.0689054	0.645343	-0.0655291	0.556144	0.93862
MYBBP1A	-0.187104	112	0.0482234	0.585901	0.499715	0.00347762	-0.184799	0.0616587	0.633309	-0.170445	0.0883572	0.738904
SPSB1	-0.29951	44	0.048253	0.585901	0.499715	0.0359805	-0.30353	0.0478514	0.595579	-0.232153	0.139029	0.787477
AKAP12	-0.187917	111	0.048263	0.585901	0.499715	0.00981257	-0.194246	0.0516032	0.606771	-0.153948	0.12816	0.778229
DBF4B	-0.205328	93	0.0483337	0.585901	0.499715	0.00620892	-0.210205	0.0534915	0.612826	-0.212506	0.0568265	0.686646
SUMF1	-0.203119	95	0.0483611	0.585901	0.499715	0.0123675	-0.201632	0.0581175	0.623335	-0.213949	0.0466103	0.659239
HFE2	-0.217373	83	0.0483819	0.585901	0.499715	0.0145989	-0.196032	0.0833726	0.664566	-0.17938	0.118524	0.764424
NSUN7	-0.189526	109	0.0484011	0.585901	0.499715	0.0123287	-0.185153	0.06515	0.645343	-0.251788	0.0123833	0.499766
EPT1	-0.201926	96	0.048505	0.585901	0.499715	0.0105548	-0.208755	0.0496182	0.601359	-0.220283	0.0391795	0.635595
ZNF286A	-0.201907	96	0.0485264	0.585901	0.499715	0.0108549	-0.200132	0.0600499	0.630229	-0.172452	0.112338	0.758895
RANBP17	-0.190182	108	0.0486712	0.586781	0.500465	0.00724247	-0.199938	0.045003	0.589881	-0.307565	0.0019562	0.408751
DNHD1	-0.18503	114	0.0487401	0.586864	0.500536	0.00618994	-0.208399	0.0337587	0.562576	-0.153145	0.124365	0.772284
FOXRED2	-0.186648	112	0.0487817	0.586992	0.500645	0.00643475	-0.191214	0.0530126	0.612031	-0.150977	0.129849	0.778229
RFC5	-0.225198	77	0.0489353	0.588093	0.501584	0.0160549	-0.202646	0.0833515	0.664566	-0.27981	0.0198837	0.556891
RIPK1	-0.186299	112	0.0492133	0.588306	0.501766	0.0146448	-0.206017	0.0377679	0.574284	-0.090026	0.373062	0.895496
MCC	-0.195206	102	0.0492819	0.588306	0.501766	0.0151261	-0.168317	0.104879	0.693535	-0.23858	0.0220055	0.56488
PPAPDC3	-0.22629	76	0.049341	0.588306	0.501766	0.013409	-0.228993	0.0530082	0.612031	-0.223827	0.0644845	0.695461
DNAJC13	-0.205483	92	0.0494149	0.588306	0.501766	0.0158168	-0.201082	0.0618222	0.633309	-0.187387	0.0898197	0.738904
SEC22C	-0.204365	93	0.049419	0.588306	0.501766	0.00725757	-0.197678	0.0664599	0.645343	-0.205878	0.0572073	0.687068
KIAA1551	-0.187728	110	0.0495406	0.588751	0.502145	0.00460609	-0.205803	0.0399563	0.577995	-0.175714	0.0835143	0.730309
ATR	-0.191088	106	0.0497428	0.588751	0.502145	0.0105059	-0.188713	0.0641433	0.642146	-0.21252	0.0366283	0.627421
IL17RE	-0.192913	104	0.0497588	0.588751	0.502145	0.0105526	-0.204183	0.0483826	0.597827	-0.199173	0.051719	0.674221
SEPHS1	-0.388537	26	0.0498122	0.588751	0.502145	0.0460439	-0.392378	0.0474039	0.593854	-0.35075	0.0856028	0.73416
PROK2	-0.233688	71	0.0498338	0.588751	0.502145	0.019662	-0.223463	0.0758992	0.654014	-0.304919	0.0121086	0.499766
FAM47E	-0.194715	102	0.0498667	0.588751	0.502145	0.0105184	-0.192927	0.0610454	0.633179	-0.162536	0.123728	0.770117
GARNL3	-0.19364	103	0.0500151	0.588751	0.502145	0.00778353	-0.209004	0.0432139	0.589821	-0.181853	0.0810573	0.72799
AFMID	-0.187345	110	0.0500154	0.588751	0.502145	0.00766086	-0.178195	0.0731536	0.647513	-0.0951718	0.351242	0.886087
CATSPERG	-0.186375	111	0.0501658	0.589244	0.502565	0.00574814	-0.197866	0.0451273	0.589881	-0.190265	0.0579487	0.689845
LOC100505666	-0.225442	76	0.0502216	0.589244	0.502565	0.00898093	-0.21066	0.0756968	0.653604	-0.167538	0.168823	0.806126
LRIG1	-0.18549	112	0.0502243	0.589244	0.502565	0.00816523	-0.165564	0.0946552	0.683251	-0.148005	0.141683	0.789172
BLM	-0.18378	114	0.0503112	0.589244	0.502565	0.010583	-0.214092	0.0290877	0.542811	-0.166713	0.089175	0.738904
LRRC32	-0.1854	112	0.0503377	0.589244	0.502565	0.00658702	-0.188958	0.0559311	0.618744	-0.157671	0.113492	0.758895
RHBDD3	-0.190531	106	0.0504258	0.58991	0.503134	0.0100755	-0.163099	0.110439	0.697442	-0.154518	0.12872	0.778229
KIAA0922	-0.186036	111	0.0505919	0.590165	0.503351	0.0109507	-0.196299	0.0458097	0.59035	-0.172283	0.0881575	0.738904
FAM3A	-0.228066	74	0.0506614	0.590165	0.503351	0.0130061	-0.237589	0.0493272	0.60003	-0.199401	0.105718	0.753807
KLRK1	-0.204326	92	0.0507376	0.590165	0.503351	0.0111523	-0.199867	0.0634472	0.637875	-0.162463	0.142259	0.789176
ARSK	-0.185079	112	0.0507446	0.590165	0.503351	0.0054313	-0.176959	0.0737501	0.648069	-0.211539	0.0346204	0.624205
KIAA1755	-0.183436	114	0.0507499	0.590165	0.503351	0.00768488	-0.193752	0.0476577	0.593949	-0.16929	0.088947	0.738904
BCL2A1	-0.212588	85	0.0507797	0.590165	0.503351	0.0178079	-0.190966	0.0939765	0.682112	-0.199993	0.0811776	0.72799
SH3D19	-0.182564	115	0.0508384	0.590165	0.503351	0.0100604	-0.179703	0.0652926	0.645343	-0.131791	0.184506	0.816495
IREB2	-0.199813	96	0.0509563	0.590237	0.503412	0.00866905	-0.208059	0.0504007	0.602708	-0.183139	0.0876524	0.738098
ANP32A	-0.272097	52	0.0510082	0.590237	0.503412	0.0173723	-0.186455	0.204473	0.780706	-0.260294	0.0772231	0.717422
IFIH1	-0.18655	110	0.0510136	0.590237	0.503412	0.010328	-0.192975	0.0531806	0.612306	-0.0683951	0.501159	0.929621
TIAF1	-0.217463	81	0.0511578	0.591171	0.504209	0.00723257	-0.211498	0.0724576	0.647513	-0.206913	0.0748872	0.715102
OSMR	-0.184697	112	0.0512318	0.591665	0.504631	0.00684188	-0.198459	0.0455465	0.59035	-0.150593	0.130838	0.778275
BTBD16	-0.188066	108	0.05128	0.59186	0.504797	0.0106383	-0.201318	0.0456992	0.59035	-0.218582	0.0323911	0.614956
ANAPC5	-0.224352	76	0.0513729	0.592211	0.505097	0.0134152	-0.215269	0.0735048	0.647821	-0.153533	0.201135	0.825237
ORC3	-0.189713	106	0.0514406	0.592581	0.505412	0.00606188	-0.184974	0.0668102	0.645343	-0.160549	0.118146	0.764424
ASPN	-0.202593	93	0.0514675	0.592581	0.505412	0.00846148	-0.217598	0.0416962	0.583711	-0.140331	0.20295	0.825871
ACAT2	-0.195239	100	0.0515801	0.592876	0.505663	0.0108063	-0.20843	0.0461723	0.590582	-0.214518	0.0435163	0.647159
FKBPL	-0.199283	96	0.0515871	0.592876	0.505663	0.00408346	-0.200943	0.0575534	0.62278	-0.1743	0.106389	0.753807
PLAGL2	-0.252348	60	0.051755	0.593672	0.506342	0.0221093	-0.254295	0.0519478	0.60753	-0.262732	0.0549373	0.68592
BC114339	-0.216892	81	0.051786	0.593672	0.506342	0.00984189	-0.212093	0.0677338	0.645343	-0.216104	0.0702872	0.705032
LYRM7	-0.238634	67	0.0518062	0.593672	0.506342	0.0079321	-0.223618	0.0756905	0.653604	-0.233224	0.0754527	0.715102
LOC286094	-0.228528	73	0.0518157	0.593672	0.506342	0.00840098	-0.200811	0.108723	0.69634	-0.255486	0.0415947	0.644037
MAP10	-0.184963	111	0.0519619	0.593672	0.506342	0.00816863	-0.187957	0.0598034	0.629348	-0.228661	0.0228159	0.570692
AX748120	-0.273622	51	0.0520324	0.593672	0.506342	0.0120105	-0.293628	0.0502675	0.602572	-0.316159	0.0303891	0.601552
PGPEP1L	-0.204277	91	0.0521041	0.593672	0.506342	0.00767008	-0.24002	0.0288466	0.542811	-0.173501	0.116737	0.762467
LOC646498	-0.20425	91	0.0521356	0.593672	0.506342	0.00575848	-0.21597	0.0484854	0.597827	-0.267271	0.0145803	0.522091
ANKAR	-0.189082	106	0.0522354	0.593672	0.506342	0.00988193	-0.155897	0.127298	0.717765	-0.212387	0.0387979	0.633254
C9orf66	-0.247642	62	0.0523071	0.593672	0.506342	0.0117294	-0.243262	0.0682438	0.645343	-0.185298	0.175607	0.809304
C2orf40	-0.200682	94	0.0524491	0.593672	0.506342	0.0109711	-0.178852	0.0994247	0.688931	-0.17345	0.112398	0.758895
CHGA	-0.189813	105	0.0524537	0.593672	0.506342	0.00669012	-0.189543	0.0629601	0.635973	-0.204818	0.0476743	0.659239
IL15	-0.19956	95	0.0525167	0.593672	0.506342	0.0101511	-0.200025	0.0601909	0.63024	-0.112475	0.302512	0.87308
TAOK2	-0.188769	106	0.0526345	0.593672	0.506342	0.00804149	-0.183861	0.0699467	0.645343	-0.106217	0.303014	0.87308
TAPBPL	-0.185266	110	0.0526594	0.593672	0.506342	0.00708467	-0.189652	0.0538246	0.613457	-0.167517	0.0974506	0.74795
GTF3C6	-0.196271	98	0.0527526	0.59373	0.506392	0.00519341	-0.224217	0.0336277	0.561414	-0.20762	0.0495793	0.666977
EFCAB5	-0.181895	114	0.0527586	0.59373	0.506392	0.00822115	-0.193601	0.048935	0.60003	-0.184439	0.0621753	0.692563
CC2D2B	-0.191361	103	0.0528266	0.593768	0.506425	0.0080492	-0.170922	0.0959067	0.685122	-0.194309	0.0591819	0.690984
BC113958	-0.275336	50	0.0529576	0.594542	0.507084	0.011217	-0.270079	0.066358	0.645343	-0.194841	0.216273	0.832907
ZNF200	-0.206994	88	0.0529877	0.594542	0.507084	0.00668713	-0.189117	0.0888249	0.673426	-0.161333	0.152809	0.795788
KDM5D	-0.339642	33	0.0531393	0.595537	0.507933	0.00687013	-0.336561	0.0554746	0.617948	-0.352588	0.060658	0.692403
DBH	-0.190143	104	0.0531957	0.595817	0.508172	0.00479276	-0.20839	0.0427081	0.587151	-0.20722	0.0439127	0.647159
ZKSCAN4	-0.195758	98	0.0533878	0.595961	0.508294	0.00852758	-0.184929	0.0759619	0.654014	-0.0653046	0.545512	0.936942
LOC641515	-0.189015	105	0.0534725	0.595961	0.508294	0.018087	-0.181728	0.0763907	0.654263	-0.174937	0.089961	0.738904
AATK-AS1	-0.286594	46	0.0534825	0.595961	0.508294	0.0182194	-0.351488	0.0304709	0.547811	-0.271854	0.0815764	0.72799
AGAP1	-0.208963	86	0.0535002	0.595961	0.508294	0.0221024	-0.218922	0.0467654	0.592646	-0.183254	0.113069	0.758895
GMEB2	-0.211434	84	0.0535236	0.595961	0.508294	0.0177591	-0.210492	0.0592709	0.627199	-0.133002	0.252058	0.851484
TASP1	-0.235165	68	0.0535529	0.595961	0.508294	0.0144967	-0.22099	0.0768851	0.654263	-0.225157	0.0864271	0.735302
GDNF-AS1	-0.226876	73	0.0535787	0.595961	0.508294	0.010005	-0.242196	0.0500785	0.601767	-0.209626	0.0911621	0.739137
EIF4E3	-0.264135	54	0.053607	0.595961	0.508294	0.0460063	-0.242946	0.0858309	0.670079	-0.276717	0.0542561	0.68506
TANGO6	-0.185387	109	0.0536139	0.595961	0.508294	0.00569333	-0.1925	0.0537809	0.613328	-0.190419	0.0617302	0.692563
RGS1	-0.205268	89	0.0536409	0.595961	0.508294	0.00951987	-0.191261	0.081369	0.662385	-0.125841	0.25994	0.855201
GTF3C4	-0.18973	104	0.0537251	0.59627	0.508559	0.00696629	-0.205165	0.0438057	0.589881	-0.199212	0.0529393	0.68166
TRMT61B	-0.202878	91	0.0537694	0.59627	0.508559	0.00866347	-0.200124	0.0732473	0.647513	-0.281009	0.0115711	0.495009
PPP3CC	-0.19631	97	0.0539591	0.59627	0.508559	0.00951623	-0.194333	0.0619615	0.6338	-0.260756	0.0135853	0.516352
WDR66	-0.186847	107	0.053971	0.59627	0.508559	0.00774659	-0.207989	0.0398696	0.577995	-0.164687	0.106967	0.753807
IGF1	-0.216243	80	0.0540347	0.59627	0.508559	0.0112312	-0.228053	0.0460655	0.590582	-0.228618	0.0517207	0.674221
ZCCHC12	-0.203712	90	0.0541273	0.59627	0.508559	0.012025	-0.210567	0.0560368	0.61877	-0.196986	0.076093	0.715224
NANOGP1	-0.256453	57	0.0541521	0.59627	0.508559	0.00799981	-0.253537	0.0617987	0.633309	-0.262168	0.0658804	0.696012
SYCE1L	-0.201402	92	0.0542118	0.59627	0.508559	0.00787321	-0.253509	0.018515	0.490266	-0.144	0.19965	0.825179
ADTRP	-0.184038	110	0.0542751	0.59627	0.508559	0.0136044	-0.19674	0.0463893	0.590582	-0.218696	0.0288157	0.599367
SFSWAP	-0.184861	109	0.0543074	0.596279	0.508566	0.0127627	-0.190021	0.0582764	0.623335	-0.100215	0.321171	0.877188
SSX4B	-0.27646	49	0.0544897	0.597368	0.509495	0.00920587	-0.288232	0.0577801	0.62278	-0.299586	0.0455743	0.653715
RD3L	-0.195786	97	0.0546168	0.597368	0.509495	0.00831984	-0.206004	0.050107	0.601767	-0.158667	0.135257	0.78436
SND1-IT1	-0.227497	72	0.0546214	0.597368	0.509495	0.00457393	-0.228426	0.0629953	0.635973	-0.176453	0.163084	0.801396
PALMD	-0.182913	111	0.0546647	0.597368	0.509495	0.0114605	-0.196896	0.0451411	0.589881	-0.152506	0.127882	0.778229
TRAF6	-0.197796	95	0.0546838	0.597368	0.509495	0.00876773	-0.220628	0.037741	0.574284	-0.189894	0.0763857	0.715224
NTHL1	-0.193703	99	0.0547214	0.597368	0.509495	0.0160282	-0.204091	0.0523226	0.609176	-0.125031	0.243027	0.844233
TIMM21	-0.188726	104	0.0550285	0.599099	0.510971	0.0100296	-0.185841	0.0713697	0.64646	-0.133613	0.204172	0.825871
SKP2	-0.199384	93	0.0553562	0.600399	0.51208	0.0048369	-0.189451	0.0788369	0.656365	-0.190113	0.0813794	0.72799
AK311291	-0.228409	71	0.0553834	0.600399	0.51208	0.00979408	-0.269002	0.031603	0.550486	-0.137756	0.277695	0.863267
BANP	-0.220539	76	0.0555703	0.600505	0.51217	0.0191988	-0.220744	0.0605586	0.631296	-0.146714	0.225527	0.837999
C6orf118	-0.191105	101	0.0555737	0.600505	0.51217	0.00637109	-0.196676	0.0602367	0.630285	-0.196549	0.0604067	0.692403
STK33	-0.182192	111	0.055641	0.600535	0.512196	0.00900729	-0.200301	0.0414806	0.582112	-0.198022	0.0494401	0.666243
SLC7A6	-0.20121	91	0.0558121	0.601297	0.512846	0.0122402	-0.210026	0.049529	0.600662	-0.201787	0.0673472	0.700026
SCN1B	-0.195759	96	0.0559462	0.602399	0.513786	0.00592878	-0.171178	0.110795	0.698029	-0.190113	0.0813796	0.72799
SAMD15	-0.179522	114	0.055979	0.60241	0.513795	0.00958982	-0.158017	0.107412	0.694614	-0.160552	0.105217	0.753807
ATE1	-0.184347	108	0.0561459	0.60291	0.514222	0.0112618	-0.175455	0.0808001	0.660176	-0.142252	0.164549	0.802878
NSG1	-0.277391	48	0.0562868	0.603601	0.514811	0.0312169	-0.255638	0.093963	0.682112	-0.126018	0.420693	0.912127
ZFP36L1	-0.207823	85	0.0563186	0.603601	0.514811	0.0101891	-0.204152	0.0711252	0.645343	-0.106213	0.361147	0.889383
HOMEZ	-0.187727	104	0.056351	0.603601	0.514811	0.00582077	-0.182025	0.0759027	0.654014	-0.168945	0.105475	0.753807
BCS1L	-0.210281	83	0.0563796	0.603601	0.514811	0.00747188	-0.20822	0.0638195	0.639919	-0.155547	0.176748	0.810044
PTGES	-0.208935	84	0.0564766	0.603991	0.515143	0.0130551	-0.193402	0.0876804	0.672407	-0.153413	0.185799	0.816495
DEFB119	-0.208888	84	0.0565334	0.604257	0.51537	0.008707	-0.230389	0.0385275	0.576117	-0.16222	0.167316	0.805433
COG1	-0.178237	115	0.056678	0.604937	0.51595	0.0170282	-0.195745	0.045373	0.59035	-0.172295	0.0818065	0.72799
MRPL27	-0.198324	93	0.0566929	0.604937	0.51595	0.00677674	-0.201757	0.0624835	0.635419	-0.172453	0.112335	0.758895
THEMIS	-0.180431	112	0.056945	0.60555	0.516473	0.0057534	-0.184512	0.062071	0.6338	-0.147527	0.14299	0.789365
AHRR	-0.193802	97	0.0571636	0.60555	0.516473	0.0128706	-0.218039	0.0401056	0.577995	-0.134434	0.209106	0.827331
SOX7	-0.208348	84	0.0571895	0.60555	0.516473	0.0135223	-0.218944	0.0510314	0.603798	-0.132236	0.251618	0.851092
ZNF596	-0.249002	59	0.0572008	0.60555	0.516473	0.00576158	-0.237655	0.086613	0.671721	-0.200067	0.15501	0.797073
GABPB2	-0.193746	97	0.0572366	0.60555	0.516473	0.0104979	-0.202737	0.0539405	0.613671	-0.220799	0.0375897	0.631486
WEE2	-0.181015	111	0.0572682	0.60555	0.516473	0.00773337	-0.208077	0.0358523	0.570443	-0.183746	0.0672544	0.69983
OC90	-0.177811	115	0.0572813	0.60555	0.516473	0.0110814	-0.168568	0.0841098	0.666094	-0.114762	0.248374	0.847546
TDP1	-0.180975	111	0.0573242	0.60555	0.516473	0.00856276	-0.196434	0.0467368	0.592646	-0.129116	0.195888	0.821941
WDR11	-0.187908	103	0.0573347	0.60555	0.516473	0.00837733	-0.19435	0.0577723	0.62278	-0.227841	0.0289391	0.599461
REP15	-0.193662	97	0.057347	0.60555	0.516473	0.0135376	-0.170477	0.108172	0.69587	-0.138716	0.192269	0.819333
NDUFB8	-0.201099	90	0.0573557	0.60555	0.516473	0.0117245	-0.180579	0.102329	0.69062	-0.183829	0.0961981	0.746245
BC118554	-0.235146	66	0.0573578	0.60555	0.516473	0.00702928	-0.247706	0.0542626	0.615117	-0.191616	0.132471	0.781394
SERPINA11	-0.183234	108	0.0576741	0.607205	0.517884	0.00659148	-0.181897	0.0730412	0.647513	-0.174101	0.0880974	0.738904
ZC3HAV1	-0.179109	113	0.0576748	0.607205	0.517884	0.0122554	-0.201622	0.0411229	0.580907	-0.128205	0.201361	0.825237
COA1	-0.220144	75	0.057718	0.607321	0.517984	0.0149526	-0.231365	0.0557743	0.618744	-0.242585	0.0446056	0.648461
CCDC63	-0.182265	109	0.0578432	0.607508	0.518143	0.0137254	-0.183768	0.0686397	0.645343	-0.213605	0.0337605	0.619574
BC007896	-0.209071	83	0.0578464	0.607508	0.518143	0.0136089	-0.225272	0.0445279	0.589881	-0.159909	0.170552	0.807123
C1orf177	-0.184829	106	0.0578614	0.607508	0.518143	0.00870274	-0.16695	0.102165	0.69062	-0.153767	0.138956	0.787477
SSX5	-0.231172	68	0.057864	0.607508	0.518143	0.00806075	-0.232306	0.0716135	0.646512	-0.252904	0.0554417	0.686643
CCR4	-0.194167	96	0.0580122	0.608066	0.518619	0.0159904	-0.166421	0.119065	0.70976	-0.195003	0.0719817	0.706425
SNX31	-0.17803	114	0.0580842	0.608066	0.518619	0.00635415	-0.206127	0.033165	0.559255	-0.208611	0.0344592	0.623318
VSTM5	-0.212704	80	0.0581879	0.608066	0.518619	0.0132465	-0.210089	0.0704332	0.645343	-0.252616	0.0298979	0.600909
APC	-0.183669	107	0.0582632	0.608066	0.518619	0.00685221	-0.16916	0.0941638	0.682184	-0.212412	0.0357454	0.624205
UBXN11	-0.186171	104	0.0584623	0.608066	0.518619	0.0106021	-0.172367	0.0913584	0.679037	-0.155682	0.134043	0.781419
ZNF619	-0.224016	72	0.0585325	0.608066	0.518619	0.00852653	-0.236933	0.059424	0.628012	-0.245339	0.0470866	0.659239
IL25	-0.197918	92	0.0586027	0.608066	0.518619	0.012351	-0.210035	0.0508697	0.603754	-0.18076	0.104133	0.753807
AL157440	-0.252002	57	0.0586158	0.608066	0.518619	0.0191718	-0.212162	0.127221	0.717765	-0.133865	0.34901	0.886019
BOLA3	-0.222384	73	0.0586234	0.608066	0.518619	0.0114704	-0.207827	0.0866088	0.671721	-0.258606	0.0360294	0.624205
ODF3L1	-0.187863	102	0.05865	0.608066	0.518619	0.0103331	-0.192889	0.061098	0.633179	-0.22811	0.0278681	0.593932
ZKSCAN5	-0.184221	106	0.0587055	0.608066	0.518619	0.0142588	-0.229785	0.0235639	0.526334	-0.173486	0.0909547	0.739137
ROM1	-0.18687	103	0.0587495	0.608066	0.518619	0.0094031	-0.197499	0.0563861	0.619925	-0.1076	0.301948	0.87308
TARBP2	-0.230361	68	0.0587725	0.608066	0.518619	0.0143422	-0.220485	0.07758	0.655655	-0.210897	0.102787	0.751699
ACTL8	-0.203403	87	0.0588141	0.608066	0.518619	0.00755611	-0.199914	0.0717458	0.646512	-0.247474	0.0289298	0.599461
TEX26	-0.189613	100	0.058829	0.608066	0.518619	0.010058	-0.1998	0.0548384	0.615735	-0.2445	0.0195066	0.555365
ZNF80	-0.237426	64	0.0588803	0.608066	0.518619	0.0135039	-0.219889	0.100273	0.689008	-0.116268	0.393468	0.90149
GFOD2	-0.226858	70	0.0589506	0.60846	0.518955	0.016289	-0.22639	0.0675687	0.645343	-0.210509	0.0923437	0.743147
UBN1	-0.180568	110	0.0590623	0.608477	0.51897	0.0100771	-0.179067	0.074652	0.649764	-0.175253	0.0811558	0.72799
FAM124B	-0.178926	112	0.0590808	0.608477	0.51897	0.00792809	-0.182505	0.0636963	0.639361	-0.176262	0.0778683	0.718105
FAM71E2	-0.193195	96	0.0593049	0.609488	0.519831	0.0038476	-0.177039	0.0989243	0.688931	-0.171871	0.113572	0.758895
ZNF584	-0.19845	91	0.0593322	0.609488	0.519831	0.00584913	-0.199524	0.0723118	0.646881	-0.193764	0.0792287	0.723352
TAF1D	-0.206588	84	0.0593716	0.609488	0.519831	0.00723163	-0.21451	0.0576456	0.62278	-0.172324	0.128857	0.778229
PAX1	-0.189142	100	0.0594715	0.609488	0.519831	0.0143443	-0.131102	0.215457	0.786689	-0.228919	0.0319273	0.614956
CDC42EP2	-0.207748	83	0.0594851	0.609488	0.519831	0.0125876	-0.212125	0.0588911	0.625276	-0.206655	0.0752592	0.715102
KATNAL2	-0.186326	103	0.0595025	0.609488	0.519831	0.00870448	-0.200729	0.0523923	0.609237	-0.203694	0.0514729	0.674221
CCDC40	-0.189079	100	0.0595583	0.609488	0.519831	0.00398621	-0.201185	0.0558436	0.618744	-0.175822	0.097394	0.74795
FUBP3	-0.203988	86	0.0595808	0.609488	0.519831	0.0111745	-0.201083	0.073687	0.648069	-0.210077	0.0631351	0.694934
RS1	-0.231372	67	0.0595826	0.609488	0.519831	0.0169892	-0.217193	0.084718	0.668806	-0.155285	0.228144	0.839224
ZNF615	-0.212896	79	0.0595972	0.609488	0.519831	0.0132608	-0.216575	0.0657106	0.645343	-0.0668289	0.57976	0.942875
RPS6KA2	-0.210138	81	0.0597104	0.610316	0.520538	0.0151509	-0.194811	0.0939602	0.682112	-0.125347	0.294115	0.871256
SPATA8	-0.215414	77	0.0599063	0.6111	0.521206	0.0127294	-0.221047	0.0584071	0.623335	-0.22555	0.0644057	0.695461
RAD18	-0.181636	108	0.0599272	0.6111	0.521206	0.0129051	-0.186372	0.0607198	0.631692	-0.144017	0.159319	0.799668
L3MBTL2	-0.189757	99	0.0599436	0.6111	0.521206	0.00578823	-0.170362	0.10446	0.693535	-0.214715	0.0409692	0.642474
VCAN	-0.173698	118	0.05996	0.6111	0.521206	0.00731931	-0.20109	0.0369025	0.570443	-0.151359	0.12143	0.767777
ARID5A	-0.179916	110	0.059999	0.6111	0.521206	0.00552722	-0.197282	0.04799	0.596073	-0.211313	0.0348194	0.624205
ATRX	-0.183287	106	0.0600195	0.6111	0.521206	0.00747075	-0.191444	0.0576635	0.62278	-0.19005	0.0622453	0.692563
RGS12	-0.183269	106	0.0600452	0.6111	0.521206	0.0177931	-0.188908	0.0652847	0.645343	-0.170956	0.0958402	0.745808
MAPKBP1	-0.181502	108	0.0601183	0.61143	0.521488	0.0095724	-0.189962	0.0596631	0.629063	-0.125358	0.221157	0.835769
IQCF3	-0.200023	89	0.0601933	0.61147	0.521523	0.0196158	-0.205335	0.0625732	0.635727	-0.169312	0.125971	0.77452
CEP44	-0.181435	108	0.0602143	0.61147	0.521523	0.00479163	-0.18065	0.0706356	0.645343	-0.216402	0.0332562	0.619574
GNG13	-0.33579	32	0.0602568	0.61147	0.521523	0.0196659	-0.369834	0.0442671	0.589881	-0.209199	0.285347	0.867047
IL7R	-0.183958	105	0.0603121	0.61147	0.521523	0.00670947	-0.191128	0.0607489	0.631692	-0.158565	0.12282	0.769801
LYSMD1	-0.197664	91	0.0603667	0.61147	0.521523	0.0126044	-0.20497	0.0598651	0.629495	-0.123648	0.265415	0.858032
DNAH14	-0.188489	100	0.0603722	0.61147	0.521523	0.0123225	-0.183823	0.0700052	0.645343	-0.150453	0.161762	0.801396
SHC1	-0.200918	88	0.0605159	0.611808	0.52181	0.00822543	-0.190735	0.0841282	0.666094	-0.133637	0.240343	0.843849
GAPT	-0.192269	96	0.0605574	0.611808	0.52181	0.00807562	-0.187921	0.0778112	0.656365	-0.171433	0.11894	0.764424
ITGBL1	-0.185565	103	0.0605697	0.611808	0.52181	0.0171114	-0.152908	0.134847	0.72812	-0.0644194	0.541812	0.936621
KIAA1984	-0.184628	104	0.0606214	0.611808	0.52181	0.00988889	-0.184124	0.0740718	0.648069	-0.108412	0.29567	0.871965
ORAOV1	-0.219172	74	0.0606317	0.611808	0.52181	0.0156703	-0.211639	0.0808587	0.660369	-0.137047	0.268773	0.859551
WDR35	-0.192101	96	0.060787	0.612968	0.5228	0.0075154	-0.19962	0.0622315	0.634051	-0.223598	0.0373555	0.630097
SPATS2	-0.188174	100	0.0608114	0.612968	0.5228	0.00771316	-0.19219	0.0664517	0.645343	-0.157956	0.137039	0.78666
ATXN2	-0.192005	96	0.0609178	0.613388	0.523158	0.0101242	-0.205464	0.0520485	0.60753	-0.267763	0.0116637	0.496027
LAPTM5	-0.191958	96	0.0609818	0.613589	0.52333	0.00878772	-0.201011	0.0546907	0.615475	-0.152214	0.156851	0.79713
TTC28	-0.180867	108	0.0610363	0.613603	0.523341	0.00996281	-0.168684	0.0934093	0.682112	-0.287056	0.00436122	0.451031
SCNM1	-0.197039	91	0.0612	0.614449	0.524063	0.0115155	-0.201341	0.0679666	0.645343	-0.116201	0.301578	0.87308
TMEM95	-0.181468	107	0.061395	0.61522	0.524721	0.0137633	-0.198115	0.0505237	0.602708	-0.0404824	0.695347	0.961867
NUDT14	-0.210048	80	0.0614729	0.61522	0.524721	0.00823293	-0.20153	0.0851011	0.669836	-0.185769	0.123632	0.770028
CCDC15	-0.180534	108	0.0615216	0.61522	0.524721	0.0079543	-0.215598	0.0330015	0.559255	-0.148049	0.150003	0.794593
ZNF518A	-0.174917	115	0.0615222	0.61522	0.524721	0.0114665	-0.149977	0.12491	0.716566	-0.213766	0.0301479	0.600909
GPR89C	-0.249226	57	0.0615467	0.61522	0.524721	0.015594	-0.240453	0.0742457	0.648069	-0.0699048	0.622408	0.949565
LRRC27	-0.197874	90	0.0615545	0.61522	0.524721	0.0115884	-0.209589	0.062056	0.6338	-0.116635	0.290708	0.869276
RNASE13	-0.184816	103	0.0616332	0.615425	0.524895	0.0118984	-0.205347	0.0447428	0.589881	-0.0993908	0.34054	0.881168
THUMPD3	-0.18045	108	0.0616445	0.615425	0.524895	0.00949752	-0.165989	0.0971295	0.685805	-0.176169	0.0827042	0.730238
ANGEL2	-0.195533	92	0.0617733	0.615533	0.524987	0.018112	-0.201808	0.064007	0.64112	-0.158738	0.14924	0.794589
FASTKD3	-0.181109	107	0.0619189	0.616584	0.525884	0.00894677	-0.19086	0.061118	0.633179	-0.177206	0.0793115	0.723352
WBP4	-0.183693	104	0.0619598	0.616668	0.525956	0.0109284	-0.202296	0.0469059	0.593341	-0.168969	0.105425	0.753807
ZNF470	-0.188242	99	0.0620531	0.617272	0.526471	0.00606119	-0.190251	0.0677573	0.645343	-0.188289	0.0738803	0.713737
CBLN4	-0.255539	54	0.0621841	0.617926	0.527028	0.0366087	-0.257803	0.0650119	0.645343	-0.211429	0.136391	0.786355
TESPA1	-0.183472	104	0.0622802	0.618556	0.527566	0.00644359	-0.205473	0.0457649	0.59035	-0.0856764	0.41677	0.909516
DNM1P41	-0.356692	28	0.0624335	0.618615	0.527616	0.00910092	-0.337356	0.0791547	0.656365	-0.243321	0.231001	0.841679
TOR3A	-0.181595	106	0.0624635	0.618615	0.527616	0.0107986	-0.177367	0.0806028	0.659415	-0.212267	0.0378695	0.631493
TTLL6	-0.175001	114	0.0625593	0.618615	0.527616	0.00472393	-0.184744	0.0604564	0.631296	-0.136565	0.171105	0.807253
RALB	-0.289887	42	0.0625754	0.618615	0.527616	0.0376691	-0.283689	0.0722641	0.646881	-0.249751	0.130478	0.778229
GGT6	-0.178139	110	0.062615	0.618615	0.527616	0.00713502	-0.183056	0.0683059	0.645343	-0.145064	0.149858	0.794589
CC2D2A	-0.175732	113	0.062631	0.618615	0.527616	0.0124439	-0.182215	0.0628289	0.635973	-0.120822	0.226416	0.838237
PHF1	-0.205251	83	0.0626822	0.618615	0.527616	0.00458984	-0.215255	0.056763	0.620583	-0.205884	0.0763777	0.715224
EFHC2	-0.176459	112	0.0627232	0.618615	0.527616	0.00671801	-0.161023	0.104188	0.693535	-0.230188	0.0212241	0.558516
CCDC105	-0.178053	110	0.0627434	0.618615	0.527616	0.00804281	-0.178426	0.0757146	0.653604	-0.229442	0.0230485	0.570692
EPHB4	-0.186773	100	0.0627928	0.61878	0.527757	0.00488641	-0.179122	0.0875554	0.672407	-0.174351	0.0983514	0.74795
ZBTB8A	-0.196913	90	0.0628538	0.61906	0.527996	0.00583676	-0.201103	0.0666084	0.645343	-0.233445	0.0336724	0.619574
ANGPTL1	-0.195715	91	0.0629971	0.619593	0.52845	0.0180018	-0.205265	0.0564878	0.619925	-0.176871	0.114203	0.759264
DAOA	-0.273324	47	0.0630375	0.619593	0.52845	0.00602642	-0.271579	0.067891	0.645343	-0.240785	0.119853	0.765481
UBE2Q2	-0.231916	65	0.0630381	0.619593	0.52845	0.0189815	-0.222032	0.0939115	0.682112	-0.275963	0.0360086	0.624205
CASP8	-0.17621	112	0.0631004	0.619771	0.528602	0.00528466	-0.196962	0.0440226	0.589881	-0.127302	0.206893	0.826745
MTMR14	-0.182892	104	0.0631264	0.619771	0.528602	0.0111115	-0.165193	0.104048	0.693535	-0.112994	0.278217	0.863874
CD72	-0.183713	103	0.0632291	0.619771	0.528602	0.00801387	-0.17833	0.0838044	0.66552	-0.102853	0.329247	0.879168
C1orf111	-0.184577	102	0.0632891	0.619771	0.528602	0.00964152	-0.190626	0.0628323	0.635973	-0.1994	0.0567003	0.686643
IL12B	-0.181008	106	0.0633301	0.619771	0.528602	0.00902334	-0.195717	0.0534378	0.612826	-0.181365	0.0802199	0.725467
MAGED4	-0.224759	69	0.0633515	0.619771	0.528602	0.00660674	-0.208737	0.0951811	0.684602	-0.232675	0.0711509	0.706344
TOMM20L	-0.243084	59	0.0635754	0.620762	0.529447	0.00608601	-0.233413	0.0925548	0.681242	-0.265028	0.0551267	0.68628
BVES-AS1	-0.251859	55	0.0636016	0.620762	0.529447	0.00639062	-0.223931	0.11798	0.709034	-0.243221	0.0887565	0.738904
FBLL1	-0.23695	62	0.0636996	0.620762	0.529447	0.0178834	-0.226401	0.0846578	0.66861	-0.246156	0.0649248	0.695461
R3HCC1L	-0.179895	107	0.0637175	0.620762	0.529447	0.00520213	-0.170503	0.0949708	0.68439	-0.165164	0.107806	0.753807
TSC2	-0.184165	102	0.0638922	0.620762	0.529447	0.011874	-0.194859	0.0557952	0.618744	-0.129895	0.209616	0.827857
FAM181A	-0.186001	100	0.0639076	0.620762	0.529447	0.00558899	-0.175226	0.0911725	0.678922	-0.186457	0.0784708	0.721368
BHLHE23	-0.288454	42	0.0639427	0.620762	0.529447	0.0217617	-0.330447	0.0399161	0.577995	-0.293328	0.0699352	0.702991
ALKBH1	-0.179669	107	0.0640574	0.621184	0.529807	0.00821393	-0.149763	0.138993	0.731871	-0.223466	0.0294918	0.600274
KRTAP23-1	-0.206658	81	0.0641618	0.621184	0.529807	0.0125728	-0.162472	0.166648	0.754263	-0.227217	0.0549285	0.68592
DNAH6	-0.173068	115	0.0643636	0.621184	0.529807	0.00788748	-0.17729	0.0690492	0.645343	-0.153685	0.12116	0.767777
CENPH	-0.192604	93	0.0643647	0.621184	0.529807	0.00936554	-0.189245	0.0774156	0.655429	-0.26666	0.014816	0.52285
GOLGA6D	-0.201505	85	0.0644148	0.621184	0.529807	0.0153264	-0.20452	0.0706068	0.645343	-0.126734	0.272059	0.861321
WDR54	-0.187549	98	0.0644194	0.621184	0.529807	0.0100457	-0.19037	0.0706873	0.645343	-0.170292	0.10856	0.756039
ELK1	-0.194685	91	0.0644232	0.621184	0.529807	0.0127581	-0.175033	0.104903	0.693535	-0.236882	0.032135	0.614956
SLC16A6	-0.187497	98	0.0644948	0.621184	0.529807	0.0137806	-0.188614	0.0717677	0.646512	-0.130338	0.220787	0.83531
CRISP1	-0.192478	93	0.0645424	0.621184	0.529807	0.00517067	-0.211261	0.0495021	0.600662	-0.195675	0.0726995	0.709315
ZNF395	-0.180995	105	0.0646404	0.621184	0.529807	0.0134708	-0.200997	0.0471953	0.59344	-0.105684	0.308058	0.875056
HOXB3	-0.208877	79	0.064692	0.621184	0.529807	0.0126873	-0.190137	0.10713	0.693969	-0.259538	0.0276943	0.593405
CLIP1	-0.179234	107	0.0647141	0.621184	0.529807	0.0140719	-0.179825	0.0734114	0.647513	-0.171012	0.0939744	0.745176
CLDN24	-0.193316	92	0.0648453	0.621184	0.529807	0.0112689	-0.188834	0.0780727	0.656365	-0.178581	0.11069	0.758895
LRRC3	-0.195429	90	0.0649028	0.621184	0.529807	0.0063154	-0.201125	0.0665775	0.645343	-0.170348	0.12133	0.767777
NCKAP5	-0.172722	115	0.0649069	0.621184	0.529807	0.00961831	-0.176489	0.0717044	0.646512	-0.166088	0.0936008	0.745176
CBX4	-0.214222	75	0.0649588	0.621184	0.529807	0.0164983	-0.202785	0.0875672	0.672407	-0.222427	0.064212	0.695461
TSPAN31	-0.220227	71	0.0649718	0.621184	0.529807	0.0126265	-0.220299	0.0732335	0.647513	-0.229373	0.068272	0.700938
KAAG1	-0.205983	81	0.0650559	0.621674	0.530225	0.00766468	-0.199936	0.0854638	0.669898	-0.190898	0.110782	0.758895
TEX28	-0.191023	94	0.0651432	0.622032	0.53053	0.0125551	-0.214834	0.0408551	0.57968	-0.165088	0.128762	0.778229
ATP6V0E2	-0.214066	75	0.065159	0.622032	0.53053	0.00641932	-0.213218	0.0763564	0.654263	-0.22541	0.0645761	0.695461
LRSAM1	-0.176387	110	0.0652834	0.622199	0.530673	0.00858263	-0.190409	0.0564875	0.619925	-0.100118	0.321645	0.877205
N4BP2L2	-0.176386	110	0.0652859	0.622199	0.530673	0.0104841	-0.189753	0.0586393	0.625057	-0.137509	0.176943	0.810058
MFSD6L	-0.176298	110	0.0654222	0.622199	0.530673	0.00881577	-0.181008	0.068663	0.645343	-0.203478	0.0423062	0.647159
DPEP2	-0.187782	97	0.0654919	0.622199	0.530673	0.0115409	-0.222492	0.0361122	0.570443	-0.199401	0.0625248	0.692595
IRAK1	-0.174643	112	0.0655198	0.622199	0.530673	0.0124662	-0.182878	0.0631466	0.636543	-0.0939818	0.349881	0.886019
RAD21L1	-0.177823	108	0.0655929	0.622199	0.530673	0.00736287	-0.183592	0.0660973	0.645343	-0.225907	0.0260861	0.591925
RBM33	-0.179478	106	0.0656354	0.622199	0.530673	0.00782757	-0.200472	0.0489689	0.60003	-0.158395	0.121241	0.767777
GVINP1	-0.192758	92	0.0656372	0.622199	0.530673	0.0100981	-0.197341	0.0737395	0.648069	-0.101876	0.359432	0.888747
LOC285074	-0.210871	77	0.0656391	0.622199	0.530673	0.00989938	-0.216865	0.0672807	0.645343	-0.25986	0.0286334	0.599176
TRIM65	-0.176933	109	0.0656974	0.622199	0.530673	0.00957494	-0.187144	0.062263	0.634051	-0.139771	0.172112	0.807399
MCF2	-0.176105	110	0.0657212	0.622199	0.530673	0.0131408	-0.169464	0.0886146	0.67318	-0.193819	0.0558419	0.686643
FOXD4L2	-0.212138	76	0.0658085	0.622199	0.530673	0.0156853	-0.211232	0.0792014	0.656365	-0.252072	0.0352795	0.624205
CENPBD1	-0.212105	76	0.0658518	0.622199	0.530673	0.0106345	-0.214186	0.074999	0.651586	-0.1823	0.130926	0.778275
CENPC1	-0.177633	108	0.0658869	0.622199	0.530673	0.00436175	-0.178914	0.0779541	0.656365	-0.154419	0.133046	0.781394
USP11	-0.180985	104	0.0659738	0.622199	0.530673	0.00836504	-0.188229	0.0634406	0.637875	-0.213228	0.0390692	0.635595
MAS1	-0.19246	92	0.0660637	0.622201	0.530675	0.0127447	-0.194486	0.0694117	0.645343	-0.185443	0.0855007	0.733949
UNK	-0.196796	88	0.0661016	0.622248	0.530715	0.0156253	-0.186313	0.0917088	0.679387	-0.196948	0.0799414	0.725303
RPL36A-HNRNPH2	-0.205132	81	0.0661978	0.622844	0.531223	0.0128332	-0.240966	0.0360043	0.570443	-0.173255	0.137148	0.78666
SOWAHD	-0.21603	73	0.0664099	0.623559	0.531833	0.00760399	-0.2113	0.0885499	0.67317	-0.190093	0.126316	0.774759
ANKRD36	-0.279222	44	0.066428	0.623559	0.531833	0.00444174	-0.279801	0.0727124	0.647513	-0.299391	0.0760807	0.715224
RBM48	-0.179684	105	0.0666343	0.623613	0.531879	0.00909684	-0.188357	0.0605553	0.631296	-0.210309	0.0407917	0.642474
MAGED2	-0.193124	91	0.0666353	0.623613	0.531879	0.0138057	-0.190863	0.0783557	0.656365	-0.0879663	0.437798	0.914418
ING5	-0.26693	48	0.0666487	0.623613	0.531879	0.018977	-0.261762	0.0723009	0.646881	-0.382463	0.0104019	0.484027
KLF11	-0.175464	110	0.0667259	0.623613	0.531879	0.00879161	-0.201824	0.0419332	0.583999	-0.0948351	0.352957	0.887262
TUBB4B	-0.522893	13	0.066728	0.623613	0.531879	0.0161778	-0.56138	0.0723389	0.646881	-0.417757	0.176595	0.810044
CPSF1	-0.193041	91	0.0667543	0.623613	0.531879	0.0153766	-0.165215	0.128463	0.718889	-0.122582	0.266637	0.858902
ALPK3	-0.175381	110	0.0668574	0.624091	0.532286	0.0147024	-0.187232	0.0582528	0.623335	-0.144748	0.150758	0.794593
LCN8	-0.20083	84	0.0669859	0.624559	0.532686	0.00669811	-0.222439	0.0567988	0.620583	-0.21094	0.0692768	0.702991
ASXL2	-0.174398	111	0.0671523	0.625302	0.53332	0.00697145	-0.197024	0.0460679	0.590582	-0.192582	0.0549066	0.68592
TNRC6B	-0.190572	93	0.0672849	0.625614	0.533585	0.0186041	-0.186349	0.0803761	0.658646	-0.0835436	0.447159	0.916887
C11orf93	-0.179196	105	0.0673899	0.626283	0.534156	0.00766822	-0.172668	0.0874376	0.672407	-0.0947862	0.358296	0.888437
GLTPD2	-0.182556	101	0.0676672	0.626512	0.534351	0.00688122	-0.198432	0.0579378	0.623193	-0.165041	0.1222	0.769463
ASTL	-0.183458	100	0.0676918	0.626512	0.534351	0.0147159	-0.169657	0.107894	0.69555	-0.115541	0.278171	0.863874
GAB4	-0.193461	90	0.0677028	0.626512	0.534351	0.00563832	-0.20919	0.0561699	0.618948	-0.24806	0.0265139	0.591925
LINC00602	-0.216465	72	0.0677985	0.626512	0.534351	0.0149783	-0.226494	0.0674395	0.645343	-0.193379	0.119773	0.765481
TBATA	-0.177155	107	0.0679332	0.626512	0.534351	0.00987081	-0.192537	0.0575155	0.62278	-0.224219	0.0280812	0.596627
ATP10A	-0.178794	105	0.0680174	0.626512	0.534351	0.00903876	-0.175555	0.0888128	0.673426	-0.234862	0.0234457	0.571673
ARHGEF5	-0.170729	115	0.0681092	0.626512	0.534351	0.0199118	-0.179282	0.0646414	0.643728	-0.113468	0.253781	0.852202
C9orf117	-0.171482	114	0.0681094	0.626512	0.534351	0.00917155	-0.157743	0.108028	0.69555	-0.189087	0.0557612	0.686643
TAMM41	-0.184082	99	0.0681596	0.626512	0.534351	0.00612586	-0.194678	0.0644334	0.643197	-0.164849	0.122641	0.769801
PDZD3	-0.174516	110	0.0682353	0.626512	0.534351	0.00969203	-0.191138	0.0555308	0.617948	-0.20156	0.0454349	0.653571
CIAPIN1	-0.183084	100	0.0682638	0.626512	0.534351	0.0175044	-0.196791	0.0572936	0.62278	-0.138502	0.190438	0.819333
OBFC1	-0.177719	106	0.0683682	0.626512	0.534351	0.00611581	-0.173413	0.0860609	0.670079	-0.141227	0.172209	0.807399
GABPB1	-0.343074	29	0.0684564	0.626512	0.534351	0.0154343	-0.348761	0.0689229	0.645343	-0.491074	0.0148194	0.52285
NYNRIN	-0.170515	115	0.068461	0.626512	0.534351	0.0108667	-0.152983	0.119225	0.710213	-0.175913	0.075499	0.715102
IL27	-0.18671	96	0.0685362	0.626512	0.534351	0.00863379	-0.210026	0.0456981	0.59035	-0.154814	0.149806	0.794589
ZFP42	-0.181983	101	0.0685486	0.626512	0.534351	0.00902205	-0.158776	0.124332	0.715769	-0.156646	0.140369	0.788139
CCL2	-0.196202	87	0.0685574	0.626512	0.534351	0.00969195	-0.183108	0.0954759	0.685122	-0.14867	0.191	0.819333
CHAF1A	-0.171919	113	0.0686392	0.626512	0.534351	0.00875182	-0.194481	0.0457514	0.59035	-0.235447	0.0177792	0.547194
HMMR	-0.173434	111	0.0687008	0.626512	0.534351	0.0135128	-0.195219	0.0492661	0.60003	-0.141135	0.16349	0.801758
C19orf47	-0.186598	96	0.0687046	0.626512	0.534351	0.0119513	-0.17988	0.0935419	0.682112	-0.228106	0.0315587	0.61078
MEIOB	-0.180923	102	0.0687947	0.62673	0.534537	0.0121964	-0.166145	0.109503	0.696692	-0.0791692	0.450645	0.916887
GPATCH2L	-0.191545	91	0.0689352	0.627105	0.534857	0.00868745	-0.179022	0.101143	0.689008	-0.165558	0.137159	0.78666
IFNA21	-0.194741	88	0.0690392	0.627412	0.535119	0.0177703	-0.185108	0.0980448	0.687351	-0.129344	0.25905	0.854312
SIKE1	-0.215464	72	0.0691111	0.627412	0.535119	0.0133576	-0.20238	0.100503	0.689008	-0.253206	0.0418413	0.644609
SLC25A24	-0.188216	94	0.069267	0.627412	0.535119	0.0122108	-0.188144	0.079186	0.656365	-0.2045	0.0620472	0.692563
DHRS4L2	-0.232276	62	0.0692693	0.627412	0.535119	0.0062966	-0.254946	0.0628143	0.635973	-0.252691	0.0602532	0.692403
KIAA1671	-0.176315	107	0.0692704	0.627412	0.535119	0.0115594	-0.200185	0.0481142	0.596887	-0.122175	0.23821	0.842722
ACP6	-0.172298	112	0.069281	0.627412	0.535119	0.0100812	-0.202076	0.0406595	0.578723	-0.145211	0.147372	0.794568
CDHR2	-0.170717	114	0.0693665	0.627412	0.535119	0.015767	-0.178777	0.0680439	0.645343	-0.0838509	0.402091	0.903023
CYTH3	-0.282826	42	0.0695453	0.627412	0.535119	0.0295818	-0.289201	0.0666642	0.645343	-0.296153	0.0635239	0.694934
EDARADD	-0.19109	91	0.0696095	0.627412	0.535119	0.0159881	-0.190355	0.0791675	0.656365	-0.158687	0.154461	0.796725
STAU1	-0.196505	86	0.0697754	0.627412	0.535119	0.00869313	-0.198963	0.0768426	0.654263	-0.226646	0.0445811	0.648461
FCAR	-0.235713	60	0.069823	0.627412	0.535119	0.0145072	-0.22857	0.0997207	0.688931	-0.221875	0.100286	0.749452
FKBP14	-0.216371	71	0.0699323	0.627412	0.535119	0.0178693	-0.217005	0.0754796	0.653362	-0.276682	0.0281515	0.596627
FBXL19-AS1	-0.181995	100	0.0699494	0.627412	0.535119	0.00795617	-0.198415	0.0565761	0.620535	-0.150136	0.153155	0.795788
HLA-DPA1	-0.210398	75	0.0700116	0.627412	0.535119	0.0153998	-0.205766	0.0874686	0.672407	-0.0401906	0.743001	0.966003
IFNA8	-0.187718	94	0.0700202	0.627412	0.535119	0.0171571	-0.184762	0.0848328	0.669154	-0.0957507	0.389193	0.900168
PRPH	-0.202322	81	0.0700824	0.627412	0.535119	0.0123878	-0.197469	0.0851709	0.669867	-0.19021	0.102141	0.751564
MROH9	-0.16949	115	0.0701643	0.627412	0.535119	0.00630361	-0.177587	0.0699275	0.645343	-0.163681	0.0985205	0.748038
OR9K2	-0.188607	93	0.0702108	0.627412	0.535119	0.0290023	-0.185347	0.0856656	0.670079	-0.0758124	0.495751	0.928954
CRK	-0.282155	42	0.0702382	0.627412	0.535119	0.0479412	-0.17391	0.283169	0.824846	-0.393238	0.0160502	0.531995
IGF2BP3	-0.210232	75	0.0702383	0.627412	0.535119	0.0142422	-0.200355	0.0869736	0.672407	-0.147046	0.235054	0.842678
SCRIB	-0.184615	97	0.0702541	0.627412	0.535119	0.00885903	-0.173533	0.101903	0.690366	-0.161745	0.127747	0.778229
IGF2R	-0.169435	115	0.0702572	0.627412	0.535119	0.00859294	-0.172271	0.0788698	0.656365	-0.114167	0.250851	0.849881
LOC100996485	-0.203454	80	0.0702816	0.627412	0.535119	0.0159627	-0.195172	0.0933413	0.682112	-0.0746087	0.530443	0.93522
DSCC1	-0.189565	92	0.070322	0.627412	0.535119	0.00786759	-0.190081	0.0778287	0.656365	-0.120423	0.284232	0.86673
APOO	-0.192727	89	0.0703762	0.627412	0.535119	0.00837683	-0.185668	0.0908527	0.678922	-0.177715	0.114773	0.760314
GRAMD3	-0.179875	102	0.070444	0.627412	0.535119	0.0072214	-0.178535	0.0851316	0.669836	-0.0959515	0.365595	0.891813
AK127191	-0.292777	39	0.070487	0.627412	0.535119	0.00679173	-0.313603	0.0665784	0.645343	-0.284704	0.120578	0.766587
AQP2	-0.200752	82	0.0705389	0.627528	0.535218	0.0133618	-0.196637	0.0824062	0.664003	-0.172796	0.143766	0.789365
CA9	-0.176311	106	0.0706225	0.627619	0.535296	0.010054	-0.190689	0.0586747	0.625082	-0.116856	0.262011	0.857025
ARFRP1	-0.245641	55	0.0706551	0.627619	0.535296	0.0191074	-0.245656	0.0762223	0.654263	-0.159692	0.258122	0.854312
JOSD1	-0.257743	50	0.0707481	0.62762	0.535297	0.0295749	-0.252342	0.0835733	0.665038	-0.255607	0.0864353	0.735302
AASDH	-0.171345	112	0.0708575	0.628019	0.535637	0.00441263	-0.191214	0.0507042	0.603698	-0.156129	0.118967	0.764424
SCGN	-0.195762	86	0.0708594	0.628019	0.535637	0.00943532	-0.195664	0.08002	0.658062	-0.171539	0.133177	0.781394
DACH2	-0.194572	87	0.0709344	0.628044	0.535658	0.0136616	-0.188607	0.095987	0.685192	-0.185653	0.103662	0.752653
CTC1	-0.17205	111	0.0709761	0.628044	0.535658	0.00442417	-0.17056	0.0865419	0.67172	-0.147068	0.142211	0.789172
LDLRAP1	-0.184923	96	0.0712745	0.628352	0.535921	0.0100297	-0.178137	0.0911482	0.678922	-0.0954446	0.373612	0.895496
RNASE9	-0.191042	90	0.0712781	0.628352	0.535921	0.00506725	-0.211686	0.0547148	0.615475	-0.144072	0.199423	0.824885
ZBED6CL	-0.20528	78	0.0713939	0.628352	0.535921	0.0143655	-0.204971	0.0863974	0.670874	-0.0606779	0.620405	0.949565
SELV	-0.188837	92	0.0714275	0.628352	0.535921	0.00660234	-0.193181	0.0730153	0.647513	-0.180351	0.100658	0.749452
PSMD4	-0.238451	58	0.0714581	0.628352	0.535921	0.0159704	-0.228114	0.0908514	0.678922	-0.125553	0.375143	0.895496
FLJ30403	-0.312964	34	0.0715143	0.628352	0.535921	0.00938175	-0.407621	0.0281723	0.541452	-0.288871	0.135996	0.786355
ECEL1	-0.185722	95	0.0715553	0.628352	0.535921	0.0163645	-0.162158	0.133464	0.727463	-0.111925	0.302019	0.87308
STS	-0.202536	80	0.0715854	0.628352	0.535921	0.00958252	-0.246601	0.0395941	0.577995	-0.173974	0.143864	0.789365
MIIP	-0.176527	105	0.0716422	0.628352	0.535921	0.00826013	-0.174055	0.0881823	0.67317	-0.181087	0.0806928	0.72799
AL833346	-0.215059	71	0.0716883	0.628352	0.535921	0.0101328	-0.201166	0.099977	0.688931	-0.139902	0.278135	0.863874
HYAL3	-0.176496	105	0.0716923	0.628352	0.535921	0.0124925	-0.180114	0.0790851	0.656365	-0.177265	0.0856992	0.73432
FAM110C	-0.226612	64	0.0717552	0.628352	0.535921	0.0112414	-0.222656	0.0845726	0.668215	-0.199586	0.123041	0.769801
LOC400043	-0.182681	98	0.0717927	0.628352	0.535921	0.00471094	-0.197482	0.065145	0.645343	-0.168149	0.115227	0.760736
NEURL3	-0.201049	81	0.0719011	0.62901	0.536482	0.0172532	-0.19291	0.0972753	0.685805	-0.143422	0.232782	0.842237
SH2D3A	-0.180722	100	0.0719646	0.629275	0.536708	0.00630462	-0.191504	0.0674464	0.645343	-0.116979	0.269472	0.859958
ARL13A	-0.191591	89	0.0720798	0.6296	0.536985	0.00812363	-0.219816	0.0458532	0.590509	-0.132435	0.241574	0.843849
RNF151	-0.179732	101	0.0721015	0.6296	0.536985	0.00757641	-0.174742	0.0957146	0.685122	-0.157103	0.139201	0.787477
CYBRD1	-0.178762	102	0.0722297	0.630138	0.537444	0.0175369	-0.192563	0.0601565	0.630229	-0.143515	0.174732	0.809304
NLRP7	-0.23171	61	0.0723645	0.630612	0.537848	0.00688046	-0.252352	0.0683076	0.645343	-0.233759	0.0801052	0.725303
MCTS1	-0.303046	36	0.0723961	0.630612	0.537848	0.0302814	-0.257398	0.141662	0.732934	-0.239188	0.195003	0.820768
LRRC69	-0.177758	103	0.072436	0.630612	0.537848	0.00855731	-0.172169	0.088372	0.67317	-0.162953	0.116588	0.762448
ABCC6P2	-0.210052	74	0.0724511	0.630612	0.537848	0.00937475	-0.20302	0.0918713	0.679387	-0.128904	0.302296	0.87308
TLR9	-0.168096	115	0.0725362	0.630612	0.537848	0.00695755	-0.170474	0.0806125	0.659415	-0.13441	0.175859	0.809304
CDC14B	-0.190198	90	0.0725603	0.630612	0.537848	0.00764769	-0.172343	0.116966	0.708495	-0.22526	0.0418779	0.644609
ARID4B	-0.175954	105	0.0725836	0.630612	0.537848	0.0128872	-0.184207	0.0708873	0.645343	-0.0563764	0.587373	0.943158
MMS19	-0.173405	108	0.0726973	0.630856	0.538056	0.00603239	-0.174424	0.0810692	0.660716	-0.096135	0.343854	0.884362
ZCCHC18	-0.184982	95	0.0727116	0.630856	0.538056	0.0133642	-0.18893	0.0796782	0.657198	-0.0811307	0.457729	0.918613
RPL32P3	-0.316444	33	0.0727871	0.630928	0.538118	0.0187876	-0.359122	0.0512972	0.604922	-0.325286	0.0850972	0.733136
BAHCC1	-0.181118	99	0.0727995	0.630928	0.538118	0.0142875	-0.178775	0.0936893	0.682112	-0.154685	0.147788	0.794568
KISS1	-0.197961	83	0.0728199	0.630928	0.538118	0.0179866	-0.231046	0.0432069	0.589821	-0.138288	0.243308	0.844233
QRFP	-0.176552	104	0.0729994	0.63151	0.538614	0.0100956	-0.180934	0.0777058	0.656365	-0.101282	0.328758	0.879157
C19orf31	-0.235056	59	0.0731214	0.631806	0.538867	0.00800391	-0.254488	0.0659256	0.645343	-0.19479	0.166419	0.804634
DCAF5	-0.175481	105	0.0733665	0.632481	0.539443	0.0131822	-0.1689	0.101795	0.690366	-0.151244	0.143452	0.789365
CSTF2	-0.198747	82	0.0734533	0.632677	0.539609	0.00577593	-0.206044	0.0703232	0.645343	-0.233576	0.0437122	0.647159
LARP7	-0.177137	103	0.073456	0.632677	0.539609	0.0076003	-0.167544	0.104613	0.693535	-0.137119	0.189977	0.819333
BASP1	-0.199864	81	0.0736284	0.633784	0.540553	0.0107002	-0.210943	0.0692733	0.645343	-0.154614	0.188403	0.817068
FANK1	-0.181492	98	0.0736941	0.633784	0.540553	0.0117256	-0.165318	0.119434	0.710562	-0.120727	0.259758	0.855201
BAZ1B	-0.179586	100	0.073801	0.633784	0.540553	0.0155076	-0.196036	0.058275	0.623335	-0.118715	0.265092	0.858032
CXCL11	-0.197248	83	0.0738781	0.633784	0.540553	0.0098368	-0.202048	0.0722855	0.646881	-0.182781	0.119058	0.764424
DHDDS	-0.197203	83	0.0739449	0.633784	0.540553	0.0109649	-0.190114	0.0911982	0.678922	-0.119595	0.300202	0.87308
TESK2	-0.18039	99	0.073978	0.633784	0.540553	0.0113543	-0.157402	0.13186	0.72397	-0.0765453	0.475867	0.921515
BRF1	-0.190341	89	0.0739917	0.633784	0.540553	0.0122963	-0.178952	0.105512	0.693969	-0.0877837	0.441722	0.915247
PLEKHO1	-0.188112	91	0.0741561	0.633784	0.540553	0.0158951	-0.185257	0.0896174	0.675197	-0.143738	0.197633	0.824397
SETD4	-0.181182	98	0.0741954	0.633784	0.540553	0.0170215	-0.204113	0.0522967	0.609176	-0.0762974	0.482438	0.924702
C16orf96	-0.173308	107	0.0742304	0.633784	0.540553	0.00854842	-0.185413	0.0690289	0.645343	-0.166331	0.107184	0.753807
ZNF687	-0.171624	109	0.0743568	0.633784	0.540553	0.00705715	-0.168612	0.0918867	0.679387	-0.145195	0.153728	0.796104
CHST4	-0.17237	108	0.074448	0.633784	0.540553	0.00864022	-0.177074	0.0764868	0.654263	-0.185235	0.0678436	0.700188
EFHB	-0.169993	111	0.0744684	0.633784	0.540553	0.00849765	-0.15248	0.127947	0.717765	-0.240393	0.0159897	0.531995
TRPC6	-0.180033	99	0.0745614	0.633784	0.540553	0.0125479	-0.161029	0.121026	0.713306	-0.0195433	0.854114	0.981941
ESF1	-0.170712	110	0.0745703	0.633784	0.540553	0.00799855	-0.199565	0.0443319	0.589881	-0.0998145	0.32312	0.877205
LOC100130155	-0.195532	84	0.0746711	0.633784	0.540553	0.0071845	-0.184213	0.108762	0.69634	-0.224367	0.0529666	0.68166
ZFP64	-0.181801	97	0.0747159	0.633784	0.540553	0.0131515	-0.180338	0.0853912	0.669898	-0.169947	0.113423	0.758895
C1orf189	-0.19668	83	0.0747298	0.633784	0.540553	0.011112	-0.226342	0.0492871	0.60003	-0.177127	0.123299	0.769801
TEX37	-0.185679	93	0.074759	0.633784	0.540553	0.0135184	-0.192982	0.0733169	0.647513	-0.191016	0.0817667	0.72799
MC2R	-0.205611	76	0.0747725	0.633784	0.540553	0.0207469	-0.21638	0.0699201	0.645343	-0.154019	0.199694	0.825179
FOXD4	-0.200345	80	0.0747741	0.633784	0.540553	0.0107959	-0.200522	0.091237	0.678922	-0.220937	0.0585356	0.690984
SLC20A1	-0.180789	98	0.0748359	0.633784	0.540553	0.00620007	-0.175866	0.0917534	0.679387	-0.137823	0.195175	0.820768
FLRT3	-0.190877	88	0.0748469	0.633784	0.540553	0.0191167	-0.185283	0.09561	0.685122	-0.238029	0.033491	0.619574
TSGA10IP	-0.17046	110	0.0750062	0.634487	0.541154	0.0110845	-0.211592	0.0336605	0.561434	-0.144865	0.152532	0.795788
POTEM	-0.296087	37	0.0751826	0.634845	0.541459	0.0153331	-0.315161	0.0651663	0.645343	-0.290836	0.0807521	0.72799
IKBKE	-0.173515	106	0.0752754	0.635151	0.541719	0.00789027	-0.190302	0.0591993	0.626961	-0.169938	0.0996765	0.749265
MASTL	-0.167975	113	0.0753371	0.635256	0.541809	0.00518469	-0.179692	0.0693353	0.645343	-0.163722	0.100126	0.74945
CIB1	-0.182352	96	0.0753685	0.635256	0.541809	0.00879352	-0.171445	0.104177	0.693535	-0.18683	0.0831451	0.730309
BEST1	-0.17684	102	0.0753989	0.635256	0.541809	0.00749746	-0.16627	0.109232	0.696692	-0.105082	0.324285	0.878141
SEMA4C	-0.17424	105	0.0754558	0.635452	0.541977	0.00803252	-0.17438	0.087581	0.672407	-0.239239	0.0202167	0.557005
SYNE1	-0.166409	115	0.0754929	0.635483	0.542003	0.0145886	-0.164883	0.0896648	0.675197	-0.0736177	0.457669	0.918613
CDKN1A	-0.184183	94	0.0755576	0.635744	0.542226	0.0105911	-0.190096	0.0743713	0.648813	-0.163694	0.13922	0.787477
CXCL9	-0.186046	92	0.0757943	0.6365	0.54287	0.00867277	-0.196789	0.0727869	0.647513	-0.128573	0.243783	0.844233
DEFB133	-0.198358	81	0.0758711	0.6365	0.54287	0.0128715	-0.216245	0.0642408	0.642442	-0.159609	0.17435	0.808927
ALS2CR12	-0.177282	101	0.0761361	0.637223	0.543487	0.00581189	-0.17379	0.0957112	0.685122	-0.154165	0.14684	0.794131
MTBP	-0.166035	115	0.0761621	0.637223	0.543487	0.00711895	-0.166881	0.087305	0.672407	-0.10086	0.305954	0.874273
MCAT	-0.177262	101	0.0761689	0.637223	0.543487	0.00963587	-0.186385	0.0720687	0.646881	-0.15313	0.1473	0.794568
YY1	-0.405078	20	0.0764324	0.638547	0.544616	0.0143654	-0.405203	0.0763328	0.654263	-0.391955	0.107686	0.753807
ZBTB46	-0.179802	98	0.0764638	0.638547	0.544616	0.0122912	-0.185422	0.0735779	0.647862	-0.160611	0.128298	0.778229
SOS1	-0.224823	63	0.0764777	0.638547	0.544616	0.0361244	-0.043615	0.736421	0.958558	-0.306488	0.020407	0.558038
BATF2	-0.177958	100	0.0764979	0.638547	0.544616	0.0116233	-0.173731	0.0995735	0.688931	-0.168474	0.112443	0.758895
AGO1	-0.454919	16	0.0766462	0.638547	0.544616	0.121822	-0.433438	0.106525	0.693969	0.217838	0.435433	0.914127
DVL2	-0.193034	85	0.0767235	0.638547	0.544616	0.0100758	-0.159126	0.164056	0.752361	-0.186926	0.105908	0.753807
MAPK15	-0.19537	83	0.0767248	0.638547	0.544616	0.00703573	-0.210507	0.0661167	0.645343	-0.224569	0.0511414	0.674221
SP100	-0.177819	100	0.0767322	0.638547	0.544616	0.00700695	-0.160004	0.131955	0.724131	-0.119268	0.268382	0.859551
ABCB8	-0.170254	109	0.0767335	0.638547	0.544616	0.00527586	-0.174086	0.0832342	0.664566	-0.1019	0.318078	0.875565
IL10RA	-0.168646	111	0.0768312	0.638857	0.544881	0.00636681	-0.163546	0.0971403	0.685805	-0.202574	0.0411614	0.642811
NIM1	-0.180445	97	0.0769462	0.638857	0.544881	0.0114906	-0.186021	0.0774901	0.65548	-0.179968	0.0933776	0.745176
CCDC152	-0.182325	95	0.0769914	0.638857	0.544881	0.00450363	-0.166742	0.120494	0.711943	-0.17026	0.121524	0.767777
ADAMTS7	-0.18729	90	0.0771233	0.638943	0.544954	0.00614807	-0.183862	0.0982273	0.687772	-0.179667	0.101978	0.751564
ZNF683	-0.17159	107	0.077191	0.638943	0.544954	0.00579752	-0.173962	0.0850568	0.669836	-0.20698	0.0430337	0.647159
LATS1	-0.176636	101	0.0772296	0.638943	0.544954	0.0104548	-0.173308	0.0930404	0.682112	-0.152388	0.149294	0.794589
SLC9C2	-0.166857	113	0.0773297	0.638943	0.544954	0.00711312	-0.182964	0.0630198	0.635973	-0.162964	0.101728	0.751564
OR2T5	-0.260201	47	0.0773325	0.638943	0.544954	0.0126949	-0.265292	0.078194	0.656365	-0.316126	0.0343833	0.623318
RNF133	-0.169908	109	0.0773444	0.638943	0.544954	0.0127795	-0.176025	0.0767772	0.654263	-0.216433	0.0305551	0.602445
KIF7	-0.171496	107	0.0773546	0.638943	0.544954	0.0122863	-0.168491	0.0972253	0.685805	-0.105148	0.307934	0.875056
ATAD3B	-0.193628	84	0.0776	0.639811	0.545695	0.00778932	-0.210007	0.0667786	0.645343	-0.192774	0.0908468	0.739137
SLBP	-0.199704	79	0.0776423	0.639811	0.545695	0.0119993	-0.192804	0.0929621	0.682112	-0.184309	0.118533	0.764424
CD3EAP	-0.172089	106	0.077742	0.639811	0.545695	0.00780247	-0.184314	0.067806	0.645343	-0.156325	0.130327	0.778229
SPPL2A	-0.17543	102	0.0777953	0.639811	0.545695	0.00572469	-0.193284	0.057844	0.62278	-0.215557	0.0369302	0.628961
NKRF	-0.190074	87	0.0778389	0.639811	0.545695	0.0130435	-0.199256	0.072705	0.647513	-0.227319	0.0439348	0.647159
REPIN1	-0.185791	91	0.0778634	0.639811	0.545695	0.0123644	-0.175128	0.104713	0.693535	-0.182821	0.0960051	0.745881
ZNF330	-0.206265	74	0.0778733	0.639811	0.545695	0.0119904	-0.210109	0.0786328	0.656365	-0.159237	0.201567	0.825377
ATP6V1F	-0.216695	67	0.0781814	0.640446	0.546236	0.0174667	-0.209951	0.0958883	0.685122	-0.292081	0.0191853	0.555365
DNTTIP2	-0.166315	113	0.0783104	0.640446	0.546236	0.00706791	-0.17496	0.075665	0.653604	-0.157368	0.11603	0.760841
PLEKHH2	-0.174168	103	0.07849	0.640446	0.546236	0.00939225	-0.16917	0.0976221	0.686034	-0.240243	0.0203644	0.558038
GSE1	-0.179518	97	0.0785007	0.640446	0.546236	0.0192274	-0.17504	0.100865	0.689008	-0.081736	0.451681	0.916887
SLC41A2	-0.180424	96	0.0785606	0.640446	0.546236	0.0132743	-0.181335	0.0890078	0.674273	-0.127652	0.24149	0.843849
RNF13	-0.204395	75	0.0785765	0.640446	0.546236	0.016963	-0.194967	0.100758	0.689008	-0.161613	0.187951	0.817068
FAM19A4	-0.225062	62	0.0786265	0.640446	0.546236	0.0118352	-0.227629	0.0802641	0.658639	-0.289168	0.0291357	0.600274
GPR174	-0.188487	88	0.0786315	0.640446	0.546236	0.0136484	-0.188271	0.0882891	0.67317	-0.20725	0.0633867	0.694934
IRAK2	-0.166135	113	0.0786377	0.640446	0.546236	0.00703941	-0.175743	0.0715473	0.646512	-0.161407	0.105086	0.753807
LRRC8A	-0.214679	68	0.0787434	0.640446	0.546236	0.0239126	-0.214823	0.0857089	0.670079	-0.0732315	0.568417	0.939051
FLYWCH1	-0.169909	108	0.078746	0.640446	0.546236	0.007153	-0.180554	0.0752216	0.652622	-0.169636	0.0984708	0.748038
CENPL	-0.177513	99	0.0787836	0.640446	0.546236	0.0105466	-0.187822	0.0714088	0.646504	-0.272875	0.0101052	0.484027
NRDE2	-0.166704	112	0.07896	0.640446	0.546236	0.0151151	-0.173443	0.0768236	0.654263	-0.117501	0.241906	0.843864
CBY1	-0.197559	80	0.0789909	0.640446	0.546236	0.0158747	-0.193174	0.0991418	0.688931	-0.17126	0.144577	0.790454
GTSE1	-0.174733	102	0.0790018	0.640446	0.546236	0.0106842	-0.204659	0.0503534	0.602572	-0.133685	0.203929	0.825871
MALL	-0.186127	90	0.0790098	0.640446	0.546236	0.0144557	-0.19424	0.0766487	0.654263	-0.105303	0.349478	0.886019
CCNF	-0.170514	107	0.0790925	0.640687	0.546441	0.0110642	-0.185269	0.0663688	0.645343	-0.0902766	0.379188	0.896449
ZDHHC7	-0.208293	72	0.0791218	0.640687	0.546441	0.0192344	-0.247372	0.0435701	0.589881	-0.237601	0.0566735	0.686643
IL34	-0.175482	101	0.0792138	0.641158	0.546843	0.00787274	-0.187635	0.0686323	0.645343	-0.181243	0.0873447	0.737334
CD164L2	-0.189172	87	0.0792869	0.641299	0.546963	0.0100454	-0.201686	0.070987	0.645343	-0.239486	0.0335274	0.619574
CCR8	-0.174514	102	0.0793842	0.641299	0.546963	0.0053294	-0.168114	0.107224	0.693969	-0.171018	0.105056	0.753807
NPLOC4	-0.205113	74	0.0795849	0.641299	0.546963	0.0173932	-0.217123	0.0709996	0.645343	-0.163506	0.179458	0.813602
GPX6	-0.193503	83	0.0796422	0.641299	0.546963	0.0111325	-0.109584	0.34932	0.853339	-0.161147	0.17018	0.806906
EXOSC10	-0.168622	109	0.0796455	0.641299	0.546963	0.0114871	-0.159792	0.108657	0.69634	-0.180869	0.0747057	0.715102
CCDC83	-0.167016	111	0.0797675	0.641299	0.546963	0.00625797	-0.174289	0.0768116	0.654263	-0.208757	0.0381134	0.631493
SPATA5	-0.172585	104	0.0797858	0.641299	0.546963	0.00719987	-0.174476	0.0908236	0.678922	-0.145461	0.157337	0.79713
ZNF774	-0.188857	87	0.0797967	0.641299	0.546963	0.00991021	-0.206558	0.0642939	0.642633	-0.20336	0.0668867	0.69827
DGKD	-0.172562	104	0.0798263	0.641299	0.546963	0.0173354	-0.129169	0.204934	0.780717	-0.134688	0.198028	0.824397
POM121L2	-0.182575	93	0.0798367	0.641299	0.546963	0.00842489	-0.174123	0.108847	0.69634	-0.146107	0.193079	0.819333
RBPMS2	-0.21714	66	0.0798921	0.641299	0.546963	0.0305686	-0.0789803	0.53836	0.913859	-0.337449	0.0083713	0.480157
RSPH3	-0.167666	110	0.0799761	0.641299	0.546963	0.00971317	-0.167314	0.0944517	0.682523	-0.14782	0.14425	0.790036
ANKS4B	-0.172321	104	0.0802559	0.641488	0.547125	0.0111104	-0.176343	0.0840184	0.665782	-0.0655068	0.532725	0.935645
AK9	-0.169825	107	0.0803296	0.641488	0.547125	0.0125504	-0.177681	0.076966	0.654263	-0.172027	0.0955206	0.745373
C1orf227	-0.199211	78	0.0803687	0.641488	0.547125	0.0157599	-0.194662	0.0988794	0.688931	-0.115233	0.345755	0.884803
PLA2G4F	-0.16593	112	0.0803811	0.641488	0.547125	0.00587367	-0.184539	0.0620317	0.6338	-0.144788	0.148567	0.794589
FAM169B	-0.181266	94	0.0803872	0.641488	0.547125	0.00576105	-0.160318	0.14034	0.731932	-0.148414	0.167587	0.805713
THRAP3	-0.181262	94	0.080395	0.641488	0.547125	0.00535944	-0.183327	0.0819604	0.664003	-0.202373	0.0632505	0.694934
OLFR690	-0.191779	84	0.0805325	0.641488	0.547125	0.017402	-0.191547	0.0951537	0.684602	-0.19667	0.0908048	0.739137
HOXA10	-0.203088	75	0.0805489	0.641488	0.547125	0.0110551	-0.190879	0.118943	0.70976	-0.30651	0.0130171	0.506971
TECPR2	-0.163606	115	0.0806187	0.641488	0.547125	0.0160387	-0.169555	0.0822845	0.664003	-0.104173	0.295014	0.871965
SLITRK2	-0.182081	93	0.0806706	0.641488	0.547125	0.0160013	-0.188915	0.0815062	0.662514	-0.153163	0.161676	0.801396
GPATCH11	-0.188321	87	0.0806718	0.641488	0.547125	0.0161456	-0.190518	0.0844881	0.668105	-0.194349	0.0861092	0.734996
TAGAP	-0.164997	113	0.0807351	0.641488	0.547125	0.00744422	-0.1734	0.0783516	0.656365	-0.131789	0.186713	0.816617
KLC1	-0.202941	75	0.0807728	0.641488	0.547125	0.0161417	-0.211185	0.077079	0.654635	-0.233873	0.0530986	0.682315
MS4A14	-0.177249	98	0.0808075	0.641488	0.547125	0.0111655	-0.192527	0.0674976	0.645343	-0.154828	0.154619	0.796725
DNAJC15	-0.190464	85	0.0808086	0.641488	0.547125	0.00535258	-0.166712	0.141982	0.733385	-0.192663	0.0910359	0.739137
C10orf54	-0.176292	99	0.0808965	0.641488	0.547125	0.00900408	-0.182948	0.0792129	0.656365	-0.0956237	0.372712	0.895496
CFLAR	-0.165637	112	0.0809239	0.641488	0.547125	0.00650117	-0.191426	0.053937	0.613671	-0.163332	0.102677	0.751699
BCL7A	-0.181926	93	0.0809327	0.641488	0.547125	0.00885365	-0.155211	0.156075	0.74902	-0.194083	0.0716597	0.706425
CDKN2B	-0.188143	87	0.0809641	0.641488	0.547125	0.0132214	-0.183305	0.10142	0.689398	-0.117811	0.301117	0.87308
bK250D10.C22.8	-0.211509	69	0.0810497	0.641488	0.547125	0.00751608	-0.227471	0.077893	0.656365	-0.173767	0.184242	0.8164
MED22	-0.208392	71	0.0811633	0.641851	0.547434	0.0217757	-0.210065	0.0831947	0.664566	-0.230178	0.0650952	0.695461
GSC2	-0.248893	50	0.081339	0.642972	0.54839	0.0180285	-0.157583	0.301218	0.835255	-0.279811	0.0658323	0.696012
C17orf58	-0.224844	61	0.081484	0.64385	0.549139	0.015737	-0.241344	0.0655549	0.645343	-0.180952	0.177966	0.81038
STRA13	-0.201022	76	0.0816409	0.644284	0.549509	0.0137933	-0.207339	0.0763039	0.654263	-0.127812	0.291687	0.869602
TRAPPC2	-0.199675	77	0.0816734	0.644284	0.549509	0.015739	-0.210617	0.0757581	0.653681	-0.23065	0.0584475	0.690984
MAATS1	-0.163739	114	0.0817265	0.644421	0.549626	0.0100684	-0.15696	0.109812	0.696751	-0.165237	0.0969803	0.747766
ZNF605	-0.176633	98	0.0818856	0.644506	0.549699	0.00975691	-0.178477	0.0961702	0.685724	-0.195726	0.0709116	0.706344
OR52B6	-0.185394	89	0.0819654	0.644694	0.549859	0.0209083	-0.195321	0.0768013	0.654263	-0.0200489	0.861688	0.983147
CHST8	-0.17122	104	0.0822349	0.646136	0.551088	0.010218	-0.170453	0.0950697	0.684602	-0.178938	0.0844166	0.730607
C3orf72	-0.256087	47	0.0823039	0.646283	0.551214	0.00679174	-0.25967	0.0887173	0.673426	-0.136189	0.395862	0.90149
TXNDC11	-0.164878	112	0.082345	0.646309	0.551236	0.00874812	-0.173535	0.0795979	0.65716	-0.249962	0.0108828	0.488126
LY6G6F	-0.172733	102	0.0825482	0.646539	0.551433	0.0118277	-0.163423	0.109724	0.696692	-0.0968636	0.358335	0.888437
ZNF2	-0.172722	102	0.0825678	0.646539	0.551433	0.0106409	-0.180672	0.0830841	0.664497	-0.209069	0.0443041	0.648461
MLLT11	-0.210446	69	0.0826252	0.646539	0.551433	0.00940464	-0.206593	0.0987072	0.688931	-0.126284	0.316151	0.875323
TRIML2	-0.170994	104	0.0826456	0.646539	0.551433	0.00649039	-0.188181	0.0693191	0.645343	-0.127426	0.223529	0.83668
POU2AF1	-0.193767	81	0.0830487	0.648636	0.553221	0.0104736	-0.19354	0.0916965	0.679387	-0.239108	0.0401959	0.642474
LEO1	-0.179643	94	0.0831811	0.648661	0.553243	0.00990946	-0.192463	0.0707686	0.645343	-0.165816	0.129359	0.778229
ADAMTS18	-0.168251	107	0.0832139	0.648661	0.553243	0.0162215	-0.14104	0.159478	0.74902	-0.145518	0.157173	0.79713
MUC20	-0.178607	95	0.083317	0.648661	0.553243	0.00751117	-0.175449	0.108253	0.69587	-0.203052	0.062351	0.692563
LOC100129726	-0.218139	64	0.0833379	0.648661	0.553243	0.00783727	-0.22074	0.0958892	0.685122	-0.143324	0.287508	0.868364
GH1	-0.19732	78	0.0833421	0.648661	0.553243	0.0113604	-0.187786	0.111623	0.699251	-0.243278	0.0409206	0.642474
IFNL4	-0.225343	60	0.0834292	0.648661	0.553243	0.00811182	-0.191981	0.152527	0.748053	-0.206041	0.146901	0.794131
KHDRBS1	-0.26391	44	0.0834478	0.648661	0.553243	0.0240706	-0.250416	0.105313	0.693969	-0.233455	0.152618	0.795788
ZDHHC14	-0.202358	74	0.0838005	0.649765	0.554184	0.0111749	-0.201982	0.0935807	0.682112	-0.179638	0.139685	0.787477
ZNF345	-0.216089	65	0.083835	0.649765	0.554184	0.0235645	-0.134444	0.314327	0.841703	-0.12241	0.355688	0.887809
KLF14	-0.221277	62	0.0839217	0.649765	0.554184	0.0200559	-0.231806	0.085605	0.670079	-0.253973	0.0589192	0.690984
MAPT-IT1	-0.194446	80	0.0839259	0.649765	0.554184	0.0102202	-0.190123	0.097686	0.686034	-0.19722	0.0992403	0.749265
TXNRD3	-0.170268	104	0.0839779	0.649765	0.554184	0.018117	-0.165827	0.10638	0.693969	-0.144093	0.165873	0.804538
PIP5K1C	-0.182148	91	0.0839799	0.649765	0.554184	0.00726159	-0.185787	0.0867766	0.672407	-0.124603	0.261714	0.857025
FOXP1	-0.205047	72	0.0840166	0.649765	0.554184	0.0186524	-0.20855	0.0854933	0.669898	-0.246324	0.0444966	0.648461
LOC441493	-0.195549	79	0.0841518	0.649803	0.554216	0.00810043	-0.190167	0.107073	0.693969	-0.199215	0.0982584	0.74795
SERTAD4	-0.185153	88	0.084164	0.649803	0.554216	0.00880427	-0.203737	0.0663721	0.645343	-0.205733	0.067129	0.698909
AK128361	-0.210934	68	0.0842317	0.649803	0.554216	0.015557	-0.215311	0.0875167	0.672407	-0.141928	0.27523	0.863065
GCH1	-0.207804	70	0.0843108	0.649803	0.554216	0.0206344	-0.210072	0.0904613	0.678495	-0.251639	0.0431678	0.647159
AK310493	-0.207769	70	0.0843643	0.649803	0.554216	0.00808975	-0.251505	0.0467705	0.592646	-0.257041	0.043719	0.647159
DEFB124	-0.199287	76	0.0843646	0.649803	0.554216	0.016917	-0.223747	0.058844	0.625276	-0.155907	0.194173	0.82012
HN1	-0.177066	96	0.0843783	0.649803	0.554216	0.010761	-0.160813	0.129988	0.723125	-0.156276	0.14833	0.794589
KCNMB2	-0.237014	54	0.0844164	0.649803	0.554216	0.0190974	-0.228768	0.0994189	0.688931	-0.185546	0.206728	0.826745
KIAA1804	-0.169819	104	0.0848105	0.651192	0.555401	0.012657	-0.164178	0.113827	0.703975	-0.148231	0.149496	0.794589
MTERFD1	-0.171474	102	0.0848441	0.651192	0.555401	0.00638096	-0.170794	0.099791	0.688931	-0.186353	0.0753034	0.715102
SEL1L3	-0.16504	110	0.0848857	0.651192	0.555401	0.00531077	-0.165206	0.0987396	0.688931	-0.204386	0.0424313	0.647159
CCDC129	-0.159296	118	0.0848888	0.651192	0.555401	0.0115666	-0.0549369	0.572275	0.922475	-0.132697	0.175096	0.809304
GOLGA7B	-0.299672	34	0.0850989	0.652445	0.55647	0.0477432	-0.270634	0.134096	0.727463	-0.233275	0.191381	0.819333
NPEPL1	-0.184451	88	0.0853673	0.653116	0.557042	0.0143068	-0.200501	0.0708983	0.645343	-0.149432	0.177552	0.8102
TNFRSF10D	-0.231963	56	0.085387	0.653116	0.557042	0.0169531	-0.249493	0.0872408	0.672407	-0.227508	0.119911	0.765481
ZNF827	-0.176503	96	0.0853872	0.653116	0.557042	0.00683264	-0.175456	0.0981048	0.687351	-0.179117	0.0969189	0.747766
CCDC121	-0.184399	88	0.0854578	0.653116	0.557042	0.00446284	-0.197602	0.0789251	0.656365	-0.185631	0.10602	0.753807
DOK2	-0.16321	112	0.0855371	0.653116	0.557042	0.010249	-0.152789	0.121521	0.713316	-0.116439	0.246221	0.846281
ECEL1P2	-0.243155	51	0.085554	0.653116	0.557042	0.00748001	-0.222378	0.133	0.726645	-0.249642	0.102204	0.751564
GABRR2	-0.178289	94	0.085568	0.653116	0.557042	0.0134965	-0.160012	0.136435	0.729824	-0.116437	0.288593	0.868825
CCDC41	-0.167748	106	0.0856524	0.653116	0.557042	0.00858556	-0.198673	0.0498643	0.601767	-0.127615	0.215322	0.83257
EED	-0.336969	27	0.0856568	0.653116	0.557042	0.0193724	-0.33248	0.0970066	0.685805	-0.327382	0.102558	0.751699
MED6	-0.229663	57	0.0856953	0.653146	0.557068	0.0129915	-0.225545	0.10104	0.689008	-0.242942	0.0826703	0.730238
SOX4	-0.282429	38	0.0857921	0.65326	0.557165	0.0217926	-0.249086	0.176608	0.759703	-0.286481	0.095223	0.74523
RAB39A	-0.245429	50	0.0858089	0.65326	0.557165	0.0290363	-0.206803	0.163101	0.750815	-0.244759	0.113681	0.758997
CASK	-0.330461	28	0.0858805	0.65326	0.557165	0.0480734	-0.314739	0.102832	0.691155	-0.366322	0.0602006	0.692403
STBD1	-0.170028	103	0.0859677	0.65326	0.557165	0.00608796	-0.160971	0.11717	0.708495	-0.1215	0.248611	0.84784
DCST2	-0.168346	105	0.0860423	0.65326	0.557165	0.0108872	-0.164851	0.108483	0.69634	-0.0783022	0.453157	0.916999
C19orf43	-0.255899	46	0.086064	0.65326	0.557165	0.0249601	-0.111558	0.48183	0.899178	-0.23678	0.131104	0.778275
NEU1	-0.170804	102	0.0860864	0.65326	0.557165	0.0166791	-0.1752	0.0860797	0.670079	-0.0670925	0.522832	0.934239
LAMA4	-0.16143	114	0.0861836	0.65326	0.557165	0.0108391	-0.138134	0.157921	0.74902	-0.069056	0.490408	0.925736
ARMC3	-0.168247	105	0.0862294	0.65326	0.557165	0.0143004	-0.192531	0.061589	0.633309	-0.120804	0.241027	0.843849
C11orf70	-0.181864	90	0.0862469	0.65326	0.557165	0.0067191	-0.18664	0.089145	0.674502	-0.17664	0.112401	0.758895
PLA2G4C	-0.261621	44	0.0862615	0.65326	0.557165	0.00586908	-0.280623	0.0879018	0.673167	-0.252338	0.116216	0.76089
ZNF391	-0.211144	67	0.0863164	0.65326	0.557165	0.0172422	-0.193734	0.131362	0.72397	-0.378506	0.00311672	0.415116
LOC285484	-0.281787	38	0.0865374	0.654113	0.557893	0.0209063	-0.286673	0.124565	0.715948	-0.361254	0.0358045	0.624205
SGOL1	-0.163351	111	0.086702	0.654113	0.557893	0.00898891	-0.178257	0.0730515	0.647513	-0.169873	0.0910904	0.739137
ADAM20P1	-0.181595	90	0.0867207	0.654113	0.557893	0.00680926	-0.172775	0.113825	0.703975	-0.246752	0.0294162	0.600274
CHRNA5	-0.174793	97	0.0868218	0.654113	0.557893	0.0121872	-0.163791	0.120815	0.71295	-0.138548	0.200623	0.825179
ECD	-0.169554	103	0.0868592	0.654113	0.557893	0.00962361	-0.168248	0.103142	0.691422	-0.157038	0.132766	0.781394
MAGI3	-0.165443	108	0.0870549	0.655011	0.558658	0.0117024	-0.162764	0.105665	0.693969	-0.120664	0.239072	0.843353
CIB4	-0.196295	77	0.0870812	0.655011	0.558658	0.0167906	-0.148554	0.209729	0.783891	-0.201438	0.0944855	0.745176
GPBP1L1	-0.175514	96	0.0871819	0.655419	0.559007	0.00742891	-0.186186	0.0772229	0.65527	-0.176327	0.102319	0.751699
FUT10	-0.169363	103	0.08722	0.655419	0.559007	0.00793042	-0.156514	0.125781	0.71734	-0.172621	0.0979999	0.74795
TXNDC8	-0.178232	93	0.0874004	0.655849	0.559373	0.00856527	-0.186741	0.0814911	0.662514	-0.12577	0.248556	0.84784
USP40	-0.16147	113	0.0875263	0.656534	0.559957	0.0105109	-0.175433	0.0748643	0.651013	-0.153731	0.122915	0.769801
C1orf112	-0.160013	115	0.0875937	0.656653	0.560059	0.00914456	-0.160924	0.0993665	0.688931	-0.137614	0.1636	0.80182
LRRC66	-0.164385	109	0.087621	0.656653	0.560059	0.00764044	-0.173356	0.0829757	0.664497	-0.0989738	0.334789	0.880156
FBXO28	-0.198582	75	0.0876475	0.656653	0.560059	0.00865398	-0.198211	0.0975197	0.685805	-0.291144	0.0144753	0.521203
TMEM140	-0.163553	110	0.0877692	0.657055	0.560402	0.00964329	-0.177638	0.0770375	0.654576	-0.128934	0.20341	0.825871
LFNG	-0.195801	77	0.0878945	0.657733	0.56098	0.0265811	-0.135462	0.263518	0.813123	-0.246864	0.0440173	0.647254
NFKBIA	-0.195761	77	0.0879613	0.657852	0.561081	0.00866795	-0.203976	0.0771646	0.655068	-0.165137	0.175098	0.809304
FHAD1	-0.163446	110	0.0879799	0.657852	0.561081	0.00832212	-0.163107	0.104922	0.693535	-0.15197	0.135223	0.78436
C20orf85	-0.182933	88	0.0880174	0.657873	0.561099	0.0110921	-0.170542	0.118642	0.709705	-0.14205	0.208783	0.826745
SYNPO2L	-0.164138	109	0.0881046	0.657952	0.561166	0.00621203	-0.179886	0.0718536	0.646512	-0.20635	0.0414949	0.644037
IZUMO1	-0.16413	109	0.08812	0.657952	0.561166	0.0100391	-0.163473	0.102377	0.690695	-0.0728406	0.475981	0.921515
AK8	-0.165566	107	0.0883254	0.658227	0.561401	0.0114177	-0.154329	0.127207	0.717765	-0.139791	0.16758	0.805713
IL7	-0.183808	87	0.0883428	0.658227	0.561401	0.00516188	-0.173764	0.116174	0.706397	-0.20978	0.0635175	0.694934
B3GNT9	-0.175769	95	0.0884192	0.658537	0.561666	0.0115302	-0.172942	0.101144	0.689008	-0.157382	0.145443	0.791988
SLC4A1AP	-0.166284	106	0.0884601	0.658583	0.561705	0.00753034	-0.159139	0.117543	0.70883	-0.182196	0.0772052	0.717422
ZRANB3	-0.160921	113	0.0886226	0.659255	0.562278	0.00635586	-0.177482	0.0714771	0.646512	-0.159927	0.106598	0.753807
BIRC5	-0.21986	61	0.0886549	0.659255	0.562278	0.01235	-0.21485	0.0963527	0.685805	-0.197508	0.152269	0.795788
SPRY1	-0.187922	83	0.088891	0.660058	0.562963	0.00932803	-0.172491	0.131007	0.72397	-0.182013	0.115573	0.760736
NEUROG3	-0.177388	93	0.0889328	0.660058	0.562963	0.00909898	-0.17444	0.102058	0.690576	-0.186453	0.0875297	0.73765
ADAMTSL1	-0.165242	107	0.0889583	0.660058	0.562963	0.0158587	-0.186416	0.0633056	0.637633	-0.155196	0.127032	0.777391
CYB5D2	-0.182395	88	0.0889709	0.660058	0.562963	0.00812039	-0.19325	0.0838901	0.66552	-0.183869	0.107084	0.753807
FLJ41200	-0.187861	83	0.0889955	0.660058	0.562963	0.010464	-0.199935	0.0792524	0.656365	-0.189677	0.103123	0.752111
SIMC1	-0.162924	110	0.0890132	0.660058	0.562963	0.0156002	-0.161597	0.106432	0.693969	-0.201355	0.0467952	0.659239
SHARPIN	-0.175345	95	0.0892019	0.660728	0.563535	0.0079731	-0.13903	0.199046	0.775348	-0.16479	0.129462	0.778229
NPR3	-0.182226	88	0.0892716	0.660728	0.563535	0.012043	-0.143132	0.196748	0.773402	-0.176503	0.119701	0.765481
BMP8B	-0.215827	63	0.089346	0.661021	0.563784	0.00657952	-0.210046	0.113523	0.703243	-0.181569	0.172551	0.807399
CXCR3	-0.172474	98	0.0894602	0.661122	0.563871	0.0158664	-0.16739	0.108768	0.69634	-0.118327	0.272205	0.861321
ANGPT4	-0.16417	108	0.0895471	0.661122	0.563871	0.0108103	-0.164137	0.0992553	0.688931	-0.193054	0.0568353	0.686646
DNAH10	-0.158344	116	0.0895694	0.661122	0.563871	0.0140902	-0.161442	0.0982684	0.687772	-0.119285	0.227786	0.839146
FLJ20021	-0.185127	85	0.0898463	0.662136	0.564735	0.00638063	-0.209084	0.0661906	0.645343	-0.157566	0.168283	0.805909
DAXX	-0.169576	101	0.0900174	0.662624	0.565151	0.00964423	-0.17786	0.088074	0.67317	-0.251573	0.0155609	0.531131
CCNB1	-0.175825	94	0.090054	0.662635	0.565161	0.00695516	-0.171944	0.109185	0.696692	-0.218465	0.0433011	0.647159
ECSIT	-0.165438	106	0.090115	0.662826	0.565324	0.00706178	-0.188298	0.0647423	0.644394	-0.153313	0.133806	0.781419
TCOF1	-0.1631	109	0.0901611	0.662844	0.565339	0.00676832	-0.223219	0.0255906	0.529794	-0.167845	0.100314	0.749452
DND1	-0.175706	94	0.0902755	0.663043	0.565509	0.0102834	-0.189251	0.0774052	0.655429	-0.245456	0.0244186	0.580648
MTA3	-0.21697	62	0.0902845	0.663043	0.565509	0.0134436	-0.170829	0.1998	0.776516	-0.263875	0.0473243	0.659239
TP63	-0.206987	68	0.0903392	0.663187	0.565632	0.0211733	-0.190409	0.131792	0.72397	-0.332249	0.00780533	0.470691
SCRN1	-0.174625	95	0.0905437	0.663689	0.566059	0.00696768	-0.185673	0.0780562	0.656365	-0.17527	0.1065	0.753807
TTC30B	-0.174582	95	0.0906243	0.663689	0.566059	0.00952686	-0.151645	0.156011	0.74902	-0.147211	0.176188	0.809788
ANAPC7	-0.186921	83	0.090636	0.663689	0.566059	0.0108105	-0.193681	0.0959204	0.685122	-0.114554	0.324447	0.878141
SYNPO2	-0.161349	111	0.0906877	0.663689	0.566059	0.00695753	-0.163137	0.101361	0.689398	-0.174594	0.0839112	0.73031
DLL1	-0.170895	99	0.0907878	0.663753	0.566114	0.0103598	-0.173529	0.0980772	0.687351	-0.103218	0.332987	0.879462
FKBP1A	-0.388174	20	0.0907885	0.663753	0.566114	0.0264316	-0.389469	0.0993032	0.688931	-0.381085	0.118691	0.764424
CCDC153	-0.16833	102	0.0908016	0.663753	0.566114	0.0084327	-0.16077	0.119616	0.710891	-0.129006	0.217793	0.833815
GPR89B	-0.216564	62	0.090904	0.664072	0.566386	0.0142652	-0.205495	0.115226	0.706397	-0.117689	0.383272	0.897724
WDR5	-0.388033	20	0.0909154	0.664072	0.566386	0.0176381	-0.372584	0.127834	0.717765	-0.392823	0.0866568	0.736056
CDC20B	-0.175273	94	0.0910846	0.664167	0.566467	0.016231	-0.188331	0.0824707	0.664003	-0.16612	0.133375	0.781419
CHRNG	-0.16186	110	0.0911487	0.664167	0.566467	0.0138589	-0.146703	0.1412	0.732547	-0.0639727	0.52717	0.934745
IL6R	-0.168955	101	0.0912181	0.664167	0.566467	0.0076512	-0.171186	0.100866	0.689008	-0.154911	0.144871	0.791234
GAGE1	-0.251891	46	0.0912684	0.664167	0.566467	0.0121491	-0.294577	0.0615382	0.633309	-0.246654	0.120031	0.765481
PIH1D2	-0.167211	103	0.0913726	0.664167	0.566467	0.0077283	-0.183687	0.068764	0.645343	-0.131618	0.20854	0.826745
TNRC6C	-0.168003	102	0.0914389	0.664167	0.566467	0.0103291	-0.180503	0.0768498	0.654263	-0.119908	0.252271	0.851525
EPG5	-0.160245	112	0.0914549	0.664167	0.566467	0.00938961	-0.172883	0.0792589	0.656365	-0.214723	0.0302185	0.601446
USP20	-0.164708	106	0.0915634	0.664167	0.566467	0.00922905	-0.152754	0.133197	0.727094	-0.201655	0.047622	0.659239
CDKN2A	-0.179916	89	0.0915789	0.664167	0.566467	0.0181189	-0.182937	0.09996	0.688931	-0.0962395	0.398825	0.902009
ZNF319	-0.198859	73	0.0916769	0.664167	0.566467	0.0142236	-0.193273	0.108918	0.69634	-0.208939	0.0975377	0.74795
DNAJB2	-0.179862	89	0.0916779	0.664167	0.566467	0.00700325	-0.18563	0.0909206	0.678922	-0.147715	0.188172	0.817068
LMAN1	-0.166239	104	0.0916837	0.664167	0.566467	0.00811303	-0.202255	0.0469507	0.593341	-0.124743	0.230943	0.841679
GREM2	-0.241041	50	0.0917429	0.664167	0.566467	0.0332602	-0.265751	0.0742519	0.648069	-0.159664	0.289186	0.868825
NFATC2IP	-0.176818	92	0.0917753	0.664167	0.566467	0.0071484	-0.167066	0.12418	0.715739	-0.197411	0.0718683	0.706425
NPR1	-0.173037	96	0.091807	0.664167	0.566467	0.00758962	-0.157756	0.137543	0.731871	-0.187928	0.0850077	0.733136
IFT122	-0.165318	105	0.0919213	0.664167	0.566467	0.0102335	-0.15224	0.134523	0.727697	-0.171661	0.0980557	0.74795
FAM208B	-0.158568	114	0.0919767	0.664167	0.566467	0.0134135	-0.191835	0.0499439	0.601767	-0.106706	0.280982	0.865144
EFTUD1P1	-0.179683	89	0.0920059	0.664167	0.566467	0.016551	-0.176738	0.114481	0.705941	-0.194474	0.0799868	0.725303
GBP2	-0.194635	76	0.0920224	0.664167	0.566467	0.0110762	-0.188393	0.115632	0.706397	-0.0428439	0.730658	0.963955
MYO1F	-0.166062	104	0.0920356	0.664167	0.566467	0.00776582	-0.132188	0.199196	0.775536	-0.0504934	0.628876	0.951205
C1orf61	-0.187241	82	0.092096	0.664167	0.566467	0.00842065	-0.191934	0.0944752	0.682523	-0.115581	0.323414	0.877205
PIAS2	-0.202848	70	0.0921532	0.664167	0.566467	0.0226385	-0.210802	0.0893212	0.67516	-0.360252	0.00372909	0.433032
EIF3J	-0.238265	51	0.0922376	0.664167	0.566467	0.0250858	-0.206657	0.15875	0.74902	-0.283478	0.0508811	0.673953
HNRNPH3	-0.359279	23	0.0922377	0.664167	0.566467	0.0373403	-0.347129	0.113463	0.703243	-0.382675	0.07879	0.722384
FBLN7	-0.169276	100	0.092249	0.664167	0.566467	0.00818691	-0.162613	0.115379	0.706397	-0.151935	0.148235	0.794589
CCNI2	-0.195813	75	0.0922495	0.664167	0.566467	0.00764821	-0.205293	0.0955989	0.685122	-0.101903	0.404746	0.904804
SLC25A3P1	-0.193176	77	0.0923209	0.664167	0.566467	0.00763149	-0.175747	0.134192	0.727463	-0.162619	0.188571	0.817068
BCMO1	-0.163472	107	0.0924837	0.664167	0.566467	0.00890345	-0.160985	0.10427	0.693535	-0.121077	0.237457	0.842678
TWISTNB	-0.174499	94	0.0925446	0.664167	0.566467	0.0110023	-0.195323	0.0681978	0.645343	-0.216631	0.047785	0.65965
PLB1	-0.158984	113	0.0925788	0.664167	0.566467	0.0127479	-0.156828	0.113647	0.703547	-0.154938	0.11812	0.764424
AX746485	-0.173548	95	0.092581	0.664167	0.566467	0.00889264	-0.182921	0.0862009	0.670447	-0.146323	0.181463	0.814819
FANCC	-0.158974	113	0.0925996	0.664167	0.566467	0.00649626	-0.173223	0.0801499	0.658306	-0.140897	0.159904	0.801329
TRABD	-0.183503	85	0.0927487	0.664167	0.566467	0.016145	-0.212543	0.0600314	0.630229	-0.129399	0.262025	0.857025
TDRD9	-0.15957	112	0.0928469	0.664167	0.566467	0.0128318	-0.171442	0.0833531	0.664566	-0.0386565	0.701126	0.963156
CENPW	-0.194147	76	0.0928571	0.664167	0.566467	0.0159767	-0.190158	0.109612	0.696692	-0.204167	0.0924266	0.743489
KLRG1	-0.195456	75	0.0928571	0.664167	0.566467	0.0120901	-0.176216	0.150591	0.745997	-0.191995	0.114007	0.759036
SMCO3	-0.185624	83	0.0929373	0.664379	0.566649	0.0119267	-0.173076	0.132251	0.724436	-0.102886	0.379731	0.896449
TARBP1	-0.161574	109	0.0932533	0.66571	0.567783	0.0136783	-0.172927	0.0837531	0.66552	-0.1693	0.0938879	0.745176
BTBD6	-0.195183	75	0.0933226	0.66571	0.567783	0.0233275	-0.166009	0.166478	0.753972	-0.106288	0.391963	0.900811
RTCA	-0.173136	95	0.0933702	0.66571	0.567783	0.0104897	-0.169542	0.1143	0.705865	-0.205698	0.0589434	0.690984
IFI30	-0.175938	92	0.0934301	0.66571	0.567783	0.00448429	-0.192216	0.0780061	0.656365	-0.152271	0.177532	0.8102
FAM220A	-0.173092	95	0.0934554	0.66571	0.567783	0.0155415	-0.180982	0.0896421	0.675197	-0.192773	0.0771311	0.717422
KMO	-0.161431	109	0.0935468	0.66571	0.567783	0.0132206	-0.163504	0.102311	0.69062	-0.124669	0.218886	0.834794
C2orf71	-0.154431	119	0.0935539	0.66571	0.567783	0.0105941	-0.161772	0.0928482	0.682112	-0.0911033	0.350689	0.886019
ZFP69B	-0.176783	91	0.0936749	0.66571	0.567783	0.00992805	-0.164796	0.134131	0.727463	-0.256772	0.0198767	0.556891
CNPPD1	-0.172046	96	0.0937115	0.66571	0.567783	0.0102576	-0.153597	0.148353	0.743103	-0.142499	0.193269	0.819333
PDLIM2	-0.16601	103	0.0937571	0.66571	0.567783	0.0125798	-0.140678	0.178625	0.760872	-0.0910816	0.387876	0.900033
COG7	-0.165194	104	0.0937711	0.66571	0.567783	0.0126767	-0.164506	0.109236	0.696692	-0.185826	0.0713924	0.706425
RSC1A1	-0.161313	109	0.0937902	0.66571	0.567783	0.00900202	-0.186626	0.063004	0.635973	-0.0867816	0.397991	0.90187
TRPM6	-0.156311	116	0.0938156	0.66571	0.567783	0.0117085	-0.173926	0.074577	0.649595	-0.103559	0.29549	0.871965
MARVELD1	-0.232525	53	0.0938366	0.66571	0.567783	0.0197542	-0.186799	0.198727	0.774892	-0.217716	0.128805	0.778229
ASXL1	-0.160515	110	0.093906	0.66571	0.567783	0.00559456	-0.178648	0.0709948	0.645343	-0.182547	0.0705319	0.705595
RAD51D	-0.168371	100	0.0940282	0.666061	0.568083	0.00994666	-0.198747	0.0561557	0.618948	-0.159624	0.130693	0.778229
MIA3	-0.165061	104	0.0940397	0.666061	0.568083	0.00601474	-0.191498	0.0630229	0.635973	-0.134341	0.191911	0.819333
MSMB	-0.197418	73	0.094101	0.666061	0.568083	0.00454072	-0.221489	0.0673995	0.645343	-0.172861	0.168513	0.805909
WDR52	-0.157551	114	0.0941073	0.666061	0.568083	0.00587029	-0.149546	0.122409	0.71446	-0.153739	0.121029	0.767777
TNFRSF18	-0.184948	83	0.0941556	0.666061	0.568083	0.00768833	-0.200243	0.0828537	0.664497	-0.139541	0.23572	0.842678
SETD3	-0.16829	100	0.0941888	0.666061	0.568083	0.014932	-0.191003	0.0681802	0.645343	-0.169426	0.110397	0.758895
C14orf93	-0.175443	92	0.0943695	0.666162	0.568169	0.013084	-0.17787	0.0973247	0.685805	-0.0975457	0.37447	0.895496
CBFA2T3	-0.171651	96	0.0944786	0.666162	0.568169	0.0172418	-0.165076	0.126523	0.717765	-0.123466	0.254569	0.852428
CLEC18A	-0.190655	78	0.0945225	0.666162	0.568169	0.0099598	-0.197822	0.0957728	0.685122	-0.196709	0.0953129	0.74523
ATF7IP2	-0.161655	108	0.0946367	0.666575	0.568521	0.010581	-0.162896	0.107181	0.693969	-0.181933	0.0745012	0.715102
HINT1	-0.241318	49	0.0948388	0.667253	0.5691	0.0165209	-0.205838	0.169944	0.756872	-0.294047	0.0473078	0.659239
AK091593	-0.18228	85	0.094983	0.667764	0.569535	0.0153158	-0.211513	0.0580221	0.623335	-0.0922703	0.43108	0.91384
KCNA6	-0.18561	82	0.0950171	0.667764	0.569535	0.0121057	-0.171345	0.138882	0.731871	-0.210203	0.0722416	0.708124
OSCP1	-0.169509	98	0.0951915	0.667969	0.56971	0.00919996	-0.165561	0.110774	0.698029	-0.149168	0.162965	0.801396
FBXL6	-0.16693	101	0.0952219	0.667969	0.56971	0.00727134	-0.156439	0.13865	0.731871	-0.160027	0.127565	0.778229
ARHGAP9	-0.162895	106	0.0952386	0.667969	0.56971	0.00838797	-0.145834	0.149778	0.745272	-0.105059	0.313575	0.875323
USH2A	-0.154948	117	0.0952929	0.667969	0.56971	0.0107292	-0.159374	0.101065	0.689008	-0.0786912	0.42491	0.91384
SLC9C1	-0.156804	114	0.0956974	0.668822	0.570438	0.00459022	-0.173192	0.0787169	0.656365	-0.127683	0.19869	0.824556
PFKL	-0.178684	88	0.0957783	0.668961	0.570556	0.0180364	-0.112176	0.318746	0.842466	-0.171917	0.124868	0.772679
ZSCAN10	-0.163286	105	0.0960431	0.670002	0.571444	0.00843115	-0.159492	0.118653	0.709705	-0.0974566	0.344854	0.884362
SCN2A	-0.186072	81	0.0962764	0.670539	0.571902	0.016572	-0.118467	0.311397	0.841297	-0.1816	0.121504	0.767777
AK125994	-0.18603	81	0.0963539	0.670539	0.571902	0.0062346	-0.17762	0.127372	0.717765	-0.144989	0.220995	0.835429
TIMP1	-0.183718	83	0.0964033	0.670539	0.571902	0.0195372	-0.164945	0.143706	0.736465	-0.142347	0.213788	0.831093
HES3	-0.183669	83	0.0964928	0.670588	0.571944	0.00662175	-0.179124	0.11906	0.70976	-0.207609	0.0823388	0.730119
TOR1A	-0.183639	83	0.0965475	0.670588	0.571944	0.012457	-0.168206	0.135843	0.729163	-0.124538	0.290421	0.869247
C4orf21	-0.16073	108	0.096564	0.670588	0.571944	0.00568902	-0.171609	0.0861736	0.670447	-0.178061	0.08262	0.730238
CASP7	-0.16461	103	0.0965982	0.670588	0.571944	0.0154058	-0.161511	0.115931	0.706397	-0.0674439	0.520652	0.934073
C22orf26	-0.314477	29	0.0966174	0.670588	0.571944	0.00946519	-0.334651	0.0947123	0.683251	-0.263155	0.17606	0.809788
CDKL1	-0.326366	27	0.0966227	0.670588	0.571944	0.00699852	-0.391567	0.0791936	0.656365	-0.419853	0.0460954	0.657989
ZBBX	-0.158405	111	0.0968109	0.671134	0.57241	0.00505401	-0.163598	0.100386	0.689008	-0.150414	0.137262	0.78666
AXL	-0.167766	99	0.0969474	0.671152	0.572425	0.00747379	-0.172072	0.0954321	0.685122	-0.182142	0.089422	0.738904
NELFCD	-0.204454	67	0.0969919	0.671152	0.572425	0.0217949	-0.19519	0.131685	0.72397	-0.155212	0.224494	0.837944
PTCH1	-0.167729	99	0.0970229	0.671152	0.572425	0.00993472	-0.156561	0.133962	0.727463	-0.240561	0.0223769	0.568524
NUDT6	-0.169409	97	0.0971428	0.671498	0.57272	0.0111722	-0.205775	0.0558633	0.618744	-0.206907	0.0530893	0.682315
ZNF79	-0.189169	78	0.09717	0.671498	0.57272	0.0105789	-0.168639	0.15977	0.74902	-0.184001	0.130163	0.778229
ZNF772	-0.186747	80	0.0971858	0.671498	0.57272	0.0110393	-0.1944	0.0993429	0.688931	-0.154848	0.190843	0.819333
DPY19L4	-0.16669	100	0.0974062	0.671937	0.573095	0.00679727	-0.177597	0.086811	0.672407	-0.232751	0.0264054	0.591925
IPO8	-0.180959	85	0.0974442	0.671937	0.573095	0.00995349	-0.153369	0.180052	0.761917	-0.191971	0.0989475	0.749265
CLEC14A	-0.165777	101	0.0975631	0.672412	0.5735	0.00617775	-0.179234	0.0891425	0.674502	-0.160584	0.126227	0.77452
TFAP2A	-0.284399	35	0.097759	0.672803	0.573833	0.0247517	-0.280633	0.107913	0.69555	-0.247132	0.172684	0.807399
OXA1L	-0.158598	110	0.097948	0.67317	0.574146	0.0062606	-0.18397	0.0655313	0.645343	-0.126399	0.207836	0.826745
NDUFS5	-0.181756	84	0.09799	0.67317	0.574146	0.0173766	-0.192552	0.0830742	0.664497	-0.198927	0.087087	0.736814
DUSP12	-0.171657	94	0.0980638	0.673231	0.574198	0.0105305	-0.179332	0.10263	0.691155	-0.226385	0.0408383	0.642474
CLEC16A	-0.162312	105	0.09807	0.673231	0.574198	0.00983066	-0.166423	0.101461	0.689434	-0.16462	0.110897	0.758895
CTSL3P	-0.34558	24	0.0981224	0.673347	0.574297	0.00709856	-0.360277	0.0912713	0.678922	-0.41669	0.0537114	0.683133
BC132944	-0.252534	44	0.0981635	0.673385	0.574329	0.0100185	-0.255358	0.102648	0.691155	-0.181846	0.281403	0.865528
ZPBP2	-0.162978	104	0.0983221	0.674004	0.574857	0.0100882	-0.158715	0.122461	0.71446	-0.181479	0.0800279	0.725303
CCDC116	-0.162947	104	0.0983884	0.674004	0.574857	0.0069152	-0.160293	0.118742	0.70976	-0.173055	0.099012	0.749265
PCBD1	-0.318621	28	0.0984316	0.674004	0.574857	0.0197161	-0.315297	0.102191	0.69062	-0.301164	0.143482	0.789365
SLC30A6	-0.175121	90	0.0987573	0.675502	0.576135	0.0114196	-0.18074	0.0958461	0.685122	-0.169968	0.12449	0.772322
MAN2A2	-0.160418	107	0.0988212	0.675552	0.576178	0.00924707	-0.160331	0.111053	0.698222	-0.0999389	0.327528	0.878869
KCNA2	-0.271659	38	0.09897	0.67598	0.576542	0.0437987	-0.211217	0.216241	0.787394	-0.186576	0.275912	0.863065
S100A1	-0.287656	34	0.0990151	0.675991	0.576552	0.0301603	-0.290774	0.106413	0.693969	-0.187818	0.311636	0.875323
AX747991	-0.176971	88	0.099056	0.675991	0.576552	0.0102988	-0.161792	0.14147	0.732934	-0.139756	0.225414	0.837993
HOXB-AS5	-0.185713	80	0.099085	0.675991	0.576552	0.00804862	-0.211053	0.0691249	0.645343	-0.182671	0.124578	0.77234
RFWD3	-0.155222	114	0.0991342	0.675991	0.576552	0.00763281	-0.167242	0.0881491	0.67317	-0.152568	0.123921	0.770557
MARVELD3	-0.166629	99	0.0992655	0.676048	0.5766	0.0110571	-0.197142	0.059619	0.629063	-0.172795	0.105381	0.753807
CDC42EP3	-0.189187	77	0.0993781	0.676155	0.576692	0.0117266	-0.184394	0.115781	0.706397	-0.167937	0.171027	0.807253
SENP1	-0.169184	96	0.099385	0.676155	0.576692	0.010946	-0.178176	0.0967421	0.685805	-0.144377	0.182145	0.81568
hCG_1816075	-0.175759	89	0.0994522	0.676155	0.576692	0.00761017	-0.193159	0.0801882	0.658306	-0.131423	0.245222	0.845453
DUS1L	-0.173764	91	0.0995079	0.676155	0.576692	0.00943981	-0.166615	0.127496	0.717765	-0.140163	0.203497	0.825871
CD180	-0.154984	114	0.0996591	0.676155	0.576692	0.00626548	-0.184992	0.0601066	0.630229	-0.137215	0.169057	0.806631
IRF8	-0.168142	97	0.0997066	0.676155	0.576692	0.019112	-0.155132	0.139786	0.731871	-0.170546	0.11426	0.759287
ZBTB6	-0.175605	89	0.0997529	0.676206	0.576735	0.0142464	-0.183939	0.0919615	0.679387	-0.175992	0.116042	0.760841
EVL	-0.178619	86	0.0998742	0.676786	0.577231	0.010849	-0.180846	0.106166	0.693969	-0.203308	0.0761608	0.715224
PEBP4	-0.15838	109	0.0999967	0.677289	0.577659	0.00465014	-0.160354	0.111001	0.698222	-0.158191	0.121728	0.768177
ADRM1	-0.190081	76	0.100041	0.677289	0.577659	0.0199398	-0.179313	0.134586	0.727697	-0.161091	0.182784	0.815975
GPR82	-0.165401	100	0.100059	0.677289	0.577659	0.016663	-0.176837	0.0881891	0.67317	-0.0721015	0.499464	0.92926
ITGAE	-0.158332	109	0.100101	0.677289	0.577659	0.0134686	-0.167552	0.0973801	0.685805	-0.0725856	0.479846	0.923249
SPPL3	-0.263678	40	0.100176	0.677374	0.577732	0.0336332	-0.263119	0.110476	0.697442	-0.0903287	0.594949	0.943859
C9orf57	-0.185058	80	0.100304	0.677736	0.57804	0.011543	-0.183103	0.118398	0.709301	-0.154125	0.199384	0.824885
CCDC36	-0.157459	110	0.100415	0.677869	0.578154	0.00602602	-0.166551	0.094315	0.682423	-0.153998	0.130029	0.778229
MYO7B	-0.156733	111	0.100432	0.677869	0.578154	0.0159163	-0.144493	0.14335	0.735632	-0.111856	0.26787	0.859551
SLX4	-0.152593	117	0.100495	0.677869	0.578154	0.0130796	-0.164236	0.0909488	0.678922	-0.0498269	0.613716	0.947632
NFIL3	-0.168626	96	0.100521	0.677869	0.578154	0.00916661	-0.157776	0.139762	0.731871	-0.155527	0.150308	0.794593
C7orf62	-0.161129	105	0.100577	0.677869	0.578154	0.00628871	-0.170232	0.093768	0.682112	-0.0991413	0.336538	0.88055
CRB1	-0.159561	107	0.100661	0.677869	0.578154	0.0158795	-0.166056	0.100449	0.689008	-0.0961226	0.351529	0.886456
VIPR2	-0.179254	85	0.100694	0.677869	0.578154	0.0117384	-0.177216	0.123107	0.714645	-0.14934	0.197896	0.824397
TEX29	-0.19364	73	0.100698	0.677869	0.578154	0.00966742	-0.22774	0.0659056	0.645343	-0.233598	0.0590648	0.690984
TCHHL1	-0.168481	96	0.100819	0.677869	0.578154	0.0119862	-0.170389	0.112475	0.701107	-0.180883	0.0861909	0.734996
PLAC1	-0.16925	95	0.101077	0.677869	0.578154	0.00576631	-0.180821	0.089932	0.676939	-0.100337	0.360887	0.889206
FBXO7	-0.154341	114	0.101091	0.677869	0.578154	0.0123047	-0.137377	0.162269	0.750769	-0.174584	0.079261	0.723352
SPPL2B	-0.167468	97	0.101091	0.677869	0.578154	0.0126453	-0.144399	0.174504	0.758445	-0.157344	0.145542	0.792033
FSIP1	-0.157865	109	0.101119	0.677869	0.578154	0.00644911	-0.14424	0.150125	0.745272	-0.132344	0.191608	0.819333
NPPA	-0.171052	93	0.101137	0.677869	0.578154	0.00791719	-0.170508	0.114341	0.705865	-0.16748	0.132591	0.781394
ANKUB1	-0.15859	108	0.101145	0.677869	0.578154	0.00952505	-0.146505	0.14581	0.739846	-0.219114	0.0293299	0.600274
GOLGA2	-0.151603	118	0.101257	0.677869	0.578154	0.020008	-0.155684	0.107635	0.695129	-0.0990356	0.312481	0.875323
RLTPR	-0.158529	108	0.101277	0.677869	0.578154	0.0113149	-0.140434	0.159184	0.74902	-0.169062	0.0978381	0.74795
ZFYVE21	-0.176799	87	0.101391	0.677869	0.578154	0.014948	-0.158704	0.154416	0.748766	-0.0613126	0.598785	0.944791
PLEKHS1	-0.15487	113	0.101446	0.677869	0.578154	0.00778399	-0.149939	0.130608	0.72397	-0.109097	0.277476	0.863065
FBXO16	-0.163904	101	0.101461	0.677869	0.578154	0.0135338	-0.163536	0.115268	0.706397	-0.10507	0.321591	0.877205
LOC643923	-0.174722	89	0.101496	0.677869	0.578154	0.0106117	-0.211401	0.0581581	0.623335	-0.206075	0.0684477	0.70145
FUK	-0.152797	116	0.10153	0.677869	0.578154	0.0124134	-0.13809	0.158055	0.74902	-0.100668	0.309253	0.875323
BTD	-0.156225	111	0.101554	0.677869	0.578154	0.015518	-0.177011	0.0751132	0.65198	-0.196324	0.0514646	0.674221
E2F5	-0.177739	86	0.101582	0.677869	0.578154	0.0127101	-0.163922	0.146242	0.739846	-0.210588	0.06422	0.695461
SLC25A14	-0.244341	46	0.101734	0.677986	0.578254	0.0200205	-0.21542	0.165341	0.752965	-0.234627	0.129912	0.778229
OTOP1	-0.158237	108	0.101916	0.678823	0.578968	0.00479647	-0.155529	0.122308	0.71446	-0.140682	0.169304	0.806745
TMEM201	-0.155276	112	0.102095	0.679678	0.579697	0.00835539	-0.169083	0.0893448	0.67516	-0.12938	0.197226	0.823806
TM6SF1	-0.179569	84	0.102169	0.679689	0.579706	0.0146665	-0.192616	0.0932869	0.682112	-0.174019	0.130126	0.778229
TIGD5	-0.194121	72	0.102274	0.679689	0.579706	0.0159374	-0.139516	0.260159	0.812814	-0.207308	0.0874147	0.737334
CFH	-0.163516	101	0.102284	0.679689	0.579706	0.00662495	-0.164056	0.116097	0.706397	-0.105313	0.325995	0.878869
MPP1	-0.17626	87	0.102452	0.679904	0.57989	0.0172606	-0.178003	0.109612	0.696692	-0.0483032	0.672491	0.960763
TEX14	-0.156517	110	0.102492	0.67993	0.579912	0.00899558	-0.196903	0.0473034	0.59344	-0.156576	0.123646	0.770028
AXDND1	-0.160953	104	0.102632	0.680233	0.58017	0.00592014	-0.17067	0.100041	0.688931	-0.160115	0.127354	0.778229
HDAC7	-0.166711	97	0.102665	0.680233	0.58017	0.0106604	-0.182336	0.0854212	0.669898	-0.230221	0.0309384	0.603667
ZC3H3	-0.157879	108	0.102702	0.680233	0.58017	0.00784921	-0.173169	0.0881568	0.67317	-0.0958856	0.347625	0.885645
TOPAZ1	-0.155603	111	0.102939	0.680233	0.58017	0.009341	-0.146221	0.142524	0.734457	-0.229483	0.0223179	0.568524
U2AF1L4	-0.164807	99	0.103071	0.680233	0.58017	0.00921082	-0.178735	0.0900505	0.677024	-0.12392	0.250023	0.848869
SND1	-0.178013	85	0.103113	0.680233	0.58017	0.0132881	-0.193714	0.085122	0.669836	-0.0531115	0.648632	0.957629
NXPE2	-0.159954	105	0.103116	0.680233	0.58017	0.01006	-0.150465	0.143391	0.735632	-0.106506	0.309578	0.875323
ATP5L2	-0.375137	20	0.103143	0.680233	0.58017	0.00929215	-0.235628	0.362595	0.858992	-0.340244	0.167114	0.805057
NAA10	-0.20395	65	0.103193	0.680233	0.58017	0.0207523	-0.159635	0.219112	0.788512	-0.183504	0.156889	0.79713
TMED9	-0.193598	72	0.10322	0.680233	0.58017	0.0140343	-0.201487	0.0994249	0.688931	-0.195412	0.118765	0.764424
CCDC87	-0.1527	115	0.10327	0.680233	0.58017	0.00757243	-0.154224	0.116223	0.706397	-0.152668	0.123673	0.770028
SNRNP27	-0.326723	26	0.103292	0.680233	0.58017	0.0253379	-0.310739	0.139431	0.731871	-0.317525	0.139838	0.787477
ARRDC4	-0.174721	88	0.103495	0.680664	0.580537	0.00735553	-0.153661	0.168112	0.754517	-0.197414	0.0831921	0.730309
ID2	-0.279763	35	0.103593	0.680664	0.580537	0.0296718	-0.228279	0.201338	0.776794	-0.0877313	0.621747	0.949565
OVOL2	-0.17767	85	0.103789	0.680664	0.580537	0.0149947	-0.168133	0.138567	0.731871	-0.160162	0.166953	0.804634
NLRP8	-0.213896	59	0.103801	0.680664	0.580537	0.0111209	-0.243206	0.0854853	0.669898	-0.204696	0.133843	0.781419
C1orf228	-0.159594	105	0.103904	0.680664	0.580537	0.0109564	-0.14293	0.164765	0.75289	-0.184878	0.0760441	0.715224
KLHL25	-0.180835	82	0.103987	0.680664	0.580537	0.0265647	-0.153559	0.179507	0.761917	-0.186113	0.114908	0.76048
ASAP2	-0.166954	96	0.10399	0.680664	0.580537	0.0095639	-0.166876	0.115941	0.706397	-0.0399042	0.716907	0.963955
COMMD6	-0.19884	68	0.104044	0.680664	0.580537	0.0181234	-0.188706	0.138564	0.731871	-0.107904	0.407817	0.905767
AP2A2	-0.178601	84	0.104061	0.680664	0.580537	0.0110239	-0.197718	0.082709	0.664304	-0.170836	0.129743	0.778229
YBX1	-0.297488	31	0.104095	0.680664	0.580537	0.0307722	-0.285216	0.133686	0.727463	-0.171507	0.364827	0.891813
TOMM5	-0.185419	78	0.104106	0.680664	0.580537	0.0162028	-0.193423	0.0963733	0.685805	-0.0734573	0.55163	0.93789
NPY4R	-0.165156	98	0.104126	0.680664	0.580537	0.0083928	-0.175328	0.0983546	0.687977	-0.14393	0.178414	0.810429
ZNF518B	-0.156496	109	0.104151	0.680664	0.580537	0.0176528	-0.193771	0.0533965	0.612826	-0.151362	0.134774	0.782283
CASP12	-0.166872	96	0.104162	0.680664	0.580537	0.0147257	-0.179804	0.0917853	0.679387	-0.123223	0.261215	0.856513
UNC93A	-0.171442	91	0.104184	0.680664	0.580537	0.00637103	-0.146913	0.187809	0.766605	-0.164102	0.133424	0.781419
ROPN1L	-0.170411	92	0.10436	0.680855	0.580701	0.0101379	-0.189061	0.0850012	0.669836	-0.178743	0.110362	0.758895
DUSP16	-0.172317	90	0.104362	0.680855	0.580701	0.0193559	-0.153969	0.162005	0.750769	-0.15105	0.178285	0.810429
VSIG4	-0.165893	97	0.104387	0.680855	0.580701	0.00976141	-0.161132	0.131426	0.72397	-0.132856	0.219926	0.83531
C9orf9	-0.178381	84	0.104496	0.681135	0.580939	0.015971	-0.198336	0.081734	0.663584	-0.157679	0.173716	0.80829
CCND1	-0.209844	61	0.104556	0.681135	0.580939	0.0154869	-0.209033	0.115316	0.706397	-0.156898	0.243798	0.844233
AMER3	-0.156279	109	0.104638	0.681135	0.580939	0.00961603	-0.167794	0.096891	0.685805	-0.186892	0.0668026	0.698215
TTC27	-0.155456	110	0.10487	0.682088	0.581752	0.00757379	-0.169923	0.0877419	0.672407	-0.17804	0.0778845	0.718105
IKBKAP	-0.154649	111	0.105093	0.682446	0.582058	0.00789262	-0.135546	0.172204	0.757755	-0.171949	0.0855435	0.733984
MICALL2	-0.171942	90	0.105129	0.682446	0.582058	0.00869201	-0.195024	0.0829919	0.664497	-0.156178	0.166537	0.804634
TRAF7	-0.182428	80	0.105312	0.682446	0.582058	0.0139418	-0.176369	0.127499	0.717765	-0.0091059	0.938624	0.992575
C6orf52	-0.182384	80	0.105397	0.682446	0.582058	0.00609526	-0.179108	0.124164	0.715739	-0.144864	0.218151	0.834381
SRRM1	-0.168973	93	0.105417	0.682446	0.582058	0.0213789	-0.0477384	0.658725	0.941356	-0.201697	0.0674717	0.700188
RALGPS2	-0.202661	65	0.105437	0.682446	0.582058	0.020778	-0.242556	0.0554437	0.617948	-0.331114	0.0111215	0.488854
SSX9	-0.20758	62	0.105466	0.682446	0.582058	0.00815546	-0.219039	0.104817	0.693535	-0.255196	0.0651512	0.695461
ZSWIM2	-0.155879	109	0.10554	0.682696	0.582271	0.00710415	-0.18412	0.0653084	0.645343	-0.0671278	0.509141	0.931008
HMX1	-0.28238	34	0.105645	0.683141	0.58265	0.0153591	-0.247843	0.164329	0.752544	-0.292787	0.103902	0.753734
UCP1	-0.166123	96	0.105747	0.683335	0.582816	0.0110954	-0.165746	0.11037	0.697442	-0.173619	0.107786	0.753807
KLHL36	-0.170623	91	0.105874	0.683455	0.582918	0.0154256	-0.156158	0.151064	0.746469	-0.10428	0.351157	0.886087
OR13H1	-0.162635	100	0.105947	0.683689	0.583118	0.0067549	-0.158893	0.126105	0.71734	-0.113252	0.290641	0.869276
NDE1	-0.177425	84	0.106397	0.685254	0.584452	0.0221308	-0.201521	0.0730489	0.647513	-0.212007	0.0659794	0.696131
PLA2G4A	-0.165817	96	0.106401	0.685254	0.584452	0.0113058	-0.163429	0.123776	0.715739	-0.152846	0.157552	0.797246
LHCGR	-0.155485	109	0.106435	0.685254	0.584452	0.0078432	-0.153005	0.126623	0.717765	-0.177769	0.0783454	0.720565
IFNLR1	-0.154729	110	0.106526	0.685254	0.584452	0.00797415	-0.171299	0.0883665	0.67317	-0.122114	0.230978	0.841679
RAC3	-0.468233	13	0.106587	0.685254	0.584452	0.0366778	-0.429159	0.143362	0.735632	-0.421151	0.225481	0.837993
LOC399815	-0.184095	78	0.106646	0.685274	0.58447	0.0109486	-0.212102	0.0736702	0.648069	-0.166281	0.168897	0.806277
TMEM176A	-0.172172	89	0.106663	0.685274	0.58447	0.00573056	-0.195311	0.0825317	0.664003	-0.12339	0.27864	0.864235
MRPL44	-0.161446	101	0.106764	0.685482	0.584647	0.0106071	-0.156051	0.13311	0.726828	-0.164401	0.121527	0.767777
MSTN	-0.206692	62	0.106999	0.686506	0.585521	0.0143776	-0.219266	0.092327	0.681038	-0.194568	0.13976	0.787477
CCDC6	-0.215615	57	0.107222	0.687703	0.586541	0.0168065	-0.20106	0.144883	0.738571	-0.238174	0.0828616	0.730309
GAL	-0.172815	88	0.107374	0.688211	0.586974	0.00997827	-0.168486	0.132691	0.725626	-0.0993448	0.374544	0.895496
CCDC178	-0.154996	109	0.107553	0.689118	0.587748	0.00735496	-0.164536	0.100133	0.689008	-0.184968	0.0697089	0.702991
LRRC40	-0.155687	108	0.107628	0.689118	0.587748	0.00594568	-0.184503	0.0661147	0.645343	-0.105127	0.302911	0.87308
RAD54B	-0.154948	109	0.107663	0.689118	0.587748	0.0101033	-0.169486	0.0901907	0.67754	-0.14201	0.160868	0.801396
UBR7	-0.169756	91	0.107686	0.689118	0.587748	0.0100791	-0.168567	0.118586	0.709705	-0.192158	0.0837188	0.73031
DNAH1	-0.152114	113	0.10775	0.689118	0.587748	0.00685902	-0.162758	0.100461	0.689008	-0.116089	0.245265	0.845453
FOXD4L1	-0.178924	82	0.107755	0.689118	0.587748	0.0113503	-0.168871	0.144763	0.738571	-0.20119	0.0813804	0.72799
DEFB126	-0.240218	46	0.107826	0.689152	0.587777	0.00775625	-0.294902	0.0519794	0.60753	-0.163197	0.301762	0.87308
OR52L1	-0.164263	97	0.107885	0.689152	0.587777	0.0250969	-0.17204	0.106935	0.693969	-0.102479	0.344903	0.884362
C9orf135	-0.157781	105	0.107944	0.689299	0.587902	0.00633313	-0.156195	0.128588	0.718933	-0.213928	0.0384153	0.631493
PRPF19	-0.310319	28	0.108021	0.689326	0.587925	0.0214677	-0.305136	0.129573	0.721669	-0.331015	0.0916913	0.74025
TRAF5	-0.164089	97	0.108264	0.689403	0.587991	0.00888764	-0.155267	0.143938	0.737181	-0.154678	0.145485	0.791988
MRPL50	-0.165788	95	0.108352	0.689403	0.587991	0.00952934	-0.16828	0.117061	0.708495	-0.179383	0.100446	0.749452
PPY2	-0.189462	73	0.108406	0.689438	0.588021	0.00616297	-0.194086	0.112756	0.701937	-0.155303	0.216715	0.832907
TOPBP1	-0.151106	114	0.108533	0.689438	0.588021	0.00842649	-0.165315	0.0919271	0.679387	-0.203167	0.0405595	0.642474
GLTSCR1L	-0.155248	108	0.108636	0.689438	0.588021	0.00650891	-0.163234	0.106445	0.693969	-0.209519	0.0404848	0.642474
FBXO43	-0.155979	107	0.108639	0.689438	0.588021	0.00697632	-0.168406	0.0973975	0.685805	-0.20358	0.0466546	0.659239
COMMD10	-0.178472	82	0.108664	0.689438	0.588021	0.0193257	-0.183176	0.110803	0.698029	-0.16361	0.160743	0.801396
NAA16	-0.164763	96	0.108676	0.689438	0.588021	0.00876283	-0.161282	0.126692	0.717765	-0.172728	0.113925	0.759036
ETV2	-0.161283	100	0.10892	0.689493	0.588068	0.00728039	-0.159847	0.125889	0.71734	-0.157307	0.143276	0.789365
SS18L1	-0.178334	82	0.108942	0.689493	0.588068	0.0141656	-0.173506	0.131279	0.72397	-0.135953	0.241592	0.843849
FAN1	-0.152975	111	0.108957	0.689493	0.588068	0.00829302	-0.164898	0.0976763	0.686034	-0.165597	0.101406	0.750358
MRPL38	-0.158841	103	0.109027	0.689526	0.588096	0.0112511	-0.169094	0.0977738	0.686301	-0.167648	0.110185	0.758895
C9orf131	-0.156548	106	0.109035	0.689526	0.588096	0.00824527	-0.175982	0.0863296	0.670874	-0.110336	0.289749	0.868825
NECAB3	-0.153593	110	0.109153	0.689942	0.588451	0.00907296	-0.160676	0.108467	0.69634	-0.0940658	0.356893	0.887809
C7orf76	-0.309358	28	0.109174	0.689942	0.588451	0.0120702	-0.328726	0.108618	0.69634	-0.325647	0.104499	0.753807
EFNA1	-0.177056	83	0.109317	0.690156	0.588634	0.0114851	-0.18865	0.0937645	0.682112	-0.115151	0.321918	0.877205
PPP1R3G	-0.18267	78	0.109432	0.690652	0.589057	0.0270231	-0.134725	0.266149	0.815185	-0.205193	0.0860499	0.734996
FANCL	-0.167041	93	0.109518	0.690652	0.589057	0.00729761	-0.175305	0.102327	0.69062	-0.141336	0.1997	0.825179
H6PD	-0.153431	110	0.10953	0.690652	0.589057	0.0100572	-0.15649	0.112651	0.701742	-0.0875488	0.386411	0.899199
SHOX	-0.327876	25	0.109589	0.690652	0.589057	0.0150851	-0.333234	0.120231	0.711241	-0.34774	0.103969	0.753734
TFEC	-0.166027	94	0.10976	0.691336	0.58964	0.00799251	-0.187504	0.0838515	0.66552	-0.182452	0.0966886	0.747565
NUP50	-0.156165	106	0.109913	0.692074	0.59027	0.0128413	-0.169215	0.0940558	0.682112	-0.105915	0.304398	0.873375
ARL3	-0.297809	30	0.109961	0.692129	0.590316	0.0395803	-0.296109	0.126024	0.71734	-0.30394	0.102489	0.751699
PATL2	-0.155369	107	0.110046	0.692216	0.59039	0.00718949	-0.155088	0.127301	0.717765	-0.153169	0.136252	0.786355
TULP3	-0.153847	109	0.110217	0.692548	0.590673	0.0119581	-0.159832	0.112184	0.700448	-0.229457	0.0230394	0.570692
CALCRL	-0.166716	93	0.11022	0.692548	0.590673	0.0192409	-0.145623	0.17836	0.760872	-0.121367	0.271442	0.8609
TRIM23	-0.203179	63	0.110245	0.692548	0.590673	0.0205367	-0.209793	0.104642	0.693535	-0.229533	0.0888067	0.738904
PDXDC1	-0.156696	105	0.110418	0.692743	0.59084	0.00686174	-0.172523	0.0860828	0.670079	-0.131771	0.208007	0.826745
RNMT	-0.164786	95	0.110534	0.692743	0.59084	0.00844431	-0.154443	0.146103	0.739846	-0.181348	0.0908513	0.739137
TSSK4	-0.163904	96	0.110557	0.692743	0.59084	0.00791894	-0.150736	0.160963	0.749409	-0.195279	0.0682604	0.700938
RUFY2	-0.176424	83	0.110609	0.692743	0.59084	0.00908062	-0.18383	0.104861	0.693535	-0.187914	0.106426	0.753807
AFAP1L2	-0.152219	111	0.110739	0.692743	0.59084	0.00927122	-0.14604	0.143026	0.735632	-0.137186	0.173494	0.808212
CD300LF	-0.158853	102	0.110777	0.692743	0.59084	0.00691168	-0.167664	0.11015	0.697442	-0.072305	0.498251	0.92926
MAML3	-0.161262	99	0.110797	0.692743	0.59084	0.0205954	-0.157164	0.134609	0.727697	-0.0733961	0.489309	0.925445
BC040860	-0.179651	80	0.11081	0.692743	0.59084	0.0106617	-0.186406	0.111791	0.699427	-0.124515	0.311689	0.875323
TARDBP	-0.249604	42	0.110903	0.692743	0.59084	0.0136345	-0.230979	0.151576	0.746871	-0.132067	0.416594	0.909516
AX747550	-0.185577	75	0.110928	0.692743	0.59084	0.0107438	-0.22048	0.0708055	0.645343	-0.20618	0.0891903	0.738904
C16orf95	-0.168213	91	0.110971	0.692743	0.59084	0.0101111	-0.167464	0.135091	0.72847	-0.0994054	0.374251	0.895496
ZCCHC16	-0.168182	91	0.111036	0.692756	0.590851	0.0130053	-0.157959	0.151273	0.746871	-0.125667	0.263627	0.857482
B3GNTL1	-0.178406	81	0.111046	0.692756	0.590851	0.0137891	-0.183069	0.121075	0.713316	-0.135646	0.252519	0.851689
SBNO2	-0.161086	99	0.111194	0.693172	0.591206	0.00852318	-0.137812	0.195212	0.7714	-0.11538	0.27342	0.862692
FAM163B	-0.185378	75	0.11132	0.69324	0.591264	0.0176099	-0.190859	0.110856	0.698029	-0.156644	0.205554	0.826745
NUP188	-0.162662	97	0.111411	0.69324	0.591264	0.0112806	-0.153583	0.146093	0.739846	-0.152643	0.15811	0.797714
NUPR1	-0.166166	93	0.111416	0.69324	0.591264	0.00956619	-0.164665	0.120921	0.713306	-0.212423	0.0523896	0.678269
PRRX2	-0.301769	29	0.111624	0.694074	0.591976	0.0189275	-0.279121	0.167318	0.754517	-0.315078	0.10942	0.758646
CHDC2	-0.158336	102	0.111958	0.695444	0.593143	0.00632628	-0.154583	0.13472	0.72785	-0.176022	0.0914604	0.739497
CCDC71L	-0.269445	36	0.112023	0.695444	0.593143	0.0154345	-0.227712	0.217946	0.788512	-0.224989	0.231949	0.842237
CCDC122	-0.159848	100	0.112148	0.695508	0.593198	0.00990744	-0.164813	0.1144	0.705865	-0.151097	0.150512	0.794593
SEC16A	-0.153669	108	0.112323	0.695913	0.593543	0.0116966	-0.163996	0.101268	0.689398	-0.117312	0.249977	0.848864
FGF19	-0.178845	80	0.112447	0.696232	0.593816	0.00810548	-0.178333	0.123248	0.714645	-0.200803	0.0862561	0.734996
EML4	-0.155056	106	0.112493	0.696232	0.593816	0.012567	-0.16199	0.114838	0.706375	-0.170382	0.0987817	0.749095
FAM209B	-0.177676	81	0.112539	0.696232	0.593816	0.0128428	-0.193109	0.0992583	0.688931	-0.236227	0.0489774	0.663549
DGKA	-0.165629	93	0.112592	0.696232	0.593816	0.00677886	-0.153804	0.154935	0.74902	-0.13211	0.230946	0.841679
IFNA4	-0.177649	81	0.112594	0.696232	0.593816	0.0178573	-0.15971	0.171092	0.756872	-0.107489	0.358666	0.888538
LRRFIP1	-0.152136	110	0.112596	0.696232	0.593816	0.00887709	-0.164327	0.102315	0.69062	-0.144742	0.150774	0.794593
SPATA19	-0.163779	95	0.112758	0.696332	0.593901	0.00769746	-0.188968	0.0761407	0.654263	-0.237013	0.027082	0.591925
BRAP	-0.163779	95	0.112759	0.696332	0.593901	0.0107596	-0.163273	0.119921	0.710998	-0.169678	0.118324	0.764424
C18orf32	-0.175361	83	0.112807	0.696343	0.593911	0.0156787	-0.169038	0.139015	0.731871	-0.169654	0.142883	0.789365
IFNAR2	-0.157178	103	0.112834	0.696343	0.593911	0.00749608	-0.163185	0.11215	0.700448	-0.102357	0.331598	0.879168
CCDC97	-0.1628	96	0.11301	0.696566	0.5941	0.0102554	-0.141035	0.1874	0.766605	-0.101169	0.3483	0.885645
FAM132B	-0.234226	47	0.113042	0.696566	0.5941	0.00872429	-0.222246	0.157181	0.74902	-0.0947147	0.561009	0.93862
KTI12	-0.160206	99	0.113186	0.696696	0.594212	0.0103926	-0.139103	0.186027	0.765186	-0.194272	0.0635051	0.694934
WASF2	-0.168051	90	0.113359	0.696999	0.59447	0.0108028	-0.17596	0.109365	0.696692	-0.179905	0.103638	0.752653
TNFSF18	-0.163466	95	0.113458	0.696999	0.59447	0.00877932	-0.168603	0.114235	0.705865	-0.127765	0.238274	0.842722
LCLAT1	-0.156135	104	0.113479	0.696999	0.59447	0.0101477	-0.153178	0.134151	0.727463	-0.138267	0.186259	0.816495
LTBR	-0.15317	108	0.113508	0.696999	0.59447	0.0066403	-0.180484	0.0708988	0.645343	-0.163685	0.11104	0.758895
VSIG1	-0.156837	103	0.113627	0.696999	0.59447	0.0108581	-0.168487	0.102647	0.691155	-0.111494	0.287333	0.868364
ELMO2	-0.20998	58	0.11364	0.696999	0.59447	0.0245907	-0.206789	0.129825	0.722646	-0.108971	0.432822	0.913849
POLN	-0.150282	112	0.113744	0.697349	0.594768	0.0146382	-0.164205	0.0974329	0.685805	-0.122768	0.216671	0.832907
TRIP6	-0.166003	92	0.11377	0.697349	0.594768	0.011636	-0.132828	0.225568	0.788512	-0.109481	0.318561	0.875565
LGSN	-0.151567	110	0.113963	0.698221	0.595512	0.0117945	-0.154781	0.122225	0.714422	-0.0469698	0.642613	0.957369
LOC100288966	-0.238892	45	0.114011	0.698221	0.595512	0.0113993	-0.266154	0.0884361	0.67317	-0.263858	0.0835115	0.730309
DNM1P34	-0.189215	71	0.114023	0.698221	0.595512	0.0103728	-0.198737	0.109666	0.696692	-0.279689	0.0252025	0.585191
TEX40	-0.162301	96	0.114135	0.698275	0.595558	0.00641149	-0.173828	0.103284	0.691768	-0.16399	0.129072	0.778229
CPED1	-0.14878	114	0.114144	0.698275	0.595558	0.00837015	-0.169428	0.0840136	0.665782	-0.0923562	0.355886	0.887809
AMZ1	-0.158958	100	0.114185	0.698275	0.595558	0.020102	-0.160083	0.131761	0.72397	-0.149124	0.165543	0.804538
RNF125	-0.170576	87	0.114194	0.698275	0.595558	0.0158218	-0.14769	0.188247	0.766605	-0.134545	0.24022	0.843849
NOL7	-0.176814	81	0.114323	0.698294	0.595574	0.0114803	-0.182895	0.108988	0.69634	-0.175822	0.145417	0.791988
TREH	-0.15652	103	0.114368	0.698294	0.595574	0.0144197	-0.156903	0.122854	0.714645	-0.149609	0.156942	0.79713
DPH1	-0.153515	107	0.114407	0.698294	0.595574	0.00598949	-0.132294	0.191779	0.767887	-0.112246	0.276234	0.863065
CCL20	-0.168495	89	0.114469	0.698294	0.595574	0.0128199	-0.167183	0.126187	0.71734	-0.118618	0.291563	0.869602
AK296065	-0.155638	104	0.114645	0.698294	0.595574	0.00718139	-0.194115	0.0580811	0.623335	-0.112857	0.278801	0.864235
MGA	-0.154798	105	0.114856	0.698294	0.595574	0.0123397	-0.178394	0.0788369	0.656365	-0.193436	0.0589817	0.690984
GIPC3	-0.181158	77	0.114857	0.698294	0.595574	0.00989294	-0.182785	0.11905	0.70976	-0.1201	0.318455	0.875565
CDYL2	-0.159471	99	0.114872	0.698294	0.595574	0.0116558	-0.157288	0.136494	0.729932	-0.198489	0.0607351	0.692403
COA5	-0.223511	51	0.11488	0.698294	0.595574	0.0225024	-0.237888	0.0997743	0.688931	-0.100154	0.502973	0.929693
ANKRD7	-0.171255	86	0.114892	0.698294	0.595574	0.0114126	-0.197431	0.0791903	0.656365	-0.251999	0.0270409	0.591925
TATDN2	-0.149795	112	0.114933	0.698294	0.595574	0.011309	-0.15289	0.12312	0.714645	-0.146605	0.143485	0.789365
TPBGL	-0.188741	71	0.114948	0.698294	0.595574	0.0205951	-0.121055	0.332928	0.84925	-0.217501	0.0842665	0.73031
TBC1D14	-0.163635	94	0.115046	0.698294	0.595574	0.0230854	-0.187466	0.083915	0.66552	-0.171275	0.119286	0.76456
MFN1	-0.158552	100	0.115125	0.698294	0.595574	0.0107965	-0.151036	0.148416	0.743103	-0.199353	0.0610746	0.692563
LAMTOR1	-0.288624	31	0.115331	0.698294	0.595574	0.0299212	-0.28982	0.1203	0.711241	-0.389064	0.0335884	0.619574
C6orf70	-0.15766	101	0.115348	0.698294	0.595574	0.0122772	-0.148978	0.154092	0.748766	-0.111827	0.288565	0.868825
PRSS46	-0.160067	98	0.11539	0.698294	0.595574	0.0118155	-0.173676	0.105607	0.693969	-0.131548	0.216492	0.832907
COPA	-0.179708	78	0.115405	0.698294	0.595574	0.0120584	-0.168143	0.155037	0.74902	-0.191273	0.11007	0.758895
TERF1	-0.159234	99	0.115419	0.698294	0.595574	0.00618213	-0.164638	0.112806	0.702013	-0.147574	0.167556	0.805713
BC040901	-0.21671	54	0.11549	0.698294	0.595574	0.00950058	-0.253668	0.0819089	0.664003	-0.199123	0.17017	0.806906
RPA2	-0.164301	93	0.115546	0.698294	0.595574	0.0148098	-0.169365	0.110526	0.697442	-0.114449	0.302889	0.87308
LRMP	-0.150222	111	0.115554	0.698294	0.595574	0.00672059	-0.154667	0.120622	0.712479	-0.159689	0.112508	0.758895
BCAT1	-0.162533	95	0.115559	0.698294	0.595574	0.00793698	-0.162175	0.133421	0.727463	-0.175548	0.103869	0.753734
TMIGD2	-0.165183	92	0.115592	0.698294	0.595574	0.0125437	-0.157916	0.151385	0.746871	-0.137928	0.216559	0.832907
NEIL2	-0.161659	96	0.115592	0.698294	0.595574	0.00654251	-0.145841	0.172656	0.758189	-0.122817	0.254298	0.852221
PTMA	-0.316127	26	0.115645	0.698294	0.595574	0.0305247	-0.315416	0.124575	0.715948	-0.0787639	0.72753	0.963955
RELT	-0.153714	106	0.115677	0.698294	0.595574	0.0115272	-0.163811	0.105196	0.693969	-0.15015	0.146404	0.793856
PLEKHG1	-0.14815	114	0.115703	0.698294	0.595574	0.015732	-0.156639	0.107133	0.693969	-0.131912	0.186298	0.816495
SLC2A6	-0.157487	101	0.115752	0.698294	0.595574	0.00747331	-0.179385	0.0888686	0.673488	-0.15006	0.153367	0.795788
POLR1A	-0.148128	114	0.115758	0.698294	0.595574	0.00474266	-0.17602	0.0710956	0.645343	-0.138221	0.163813	0.802196
RBM6	-0.155838	103	0.115974	0.698294	0.595574	0.0106543	-0.156522	0.125761	0.71734	-0.213037	0.0403382	0.642474
SLC25A21-AS1	-0.195339	66	0.115996	0.698294	0.595574	0.00906222	-0.17804	0.159273	0.74902	-0.198884	0.131018	0.778275
ATXN10	-0.159782	98	0.116047	0.698294	0.595574	0.0139248	-0.129322	0.219216	0.788512	-0.12194	0.249545	0.848179
C1orf185	-0.171734	85	0.116052	0.698294	0.595574	0.00888205	-0.159733	0.165243	0.752902	-0.194285	0.0904303	0.739137
MDM4	-0.159759	98	0.116102	0.698294	0.595574	0.0124983	-0.151061	0.15061	0.745997	-0.140097	0.187838	0.817068
C8orf76	-0.153476	106	0.116248	0.698294	0.595574	0.00937188	-0.155495	0.122391	0.71446	-0.103667	0.312259	0.875323
SLC35A3	-0.166734	90	0.116257	0.698294	0.595574	0.0182732	-0.156991	0.153825	0.748766	-0.0124206	0.911814	0.988704
KBTBD12	-0.158038	100	0.116323	0.698294	0.595574	0.0103659	-0.159992	0.123472	0.71495	-0.219187	0.0368459	0.628873
ATP2B4	-0.151984	108	0.116363	0.698294	0.595574	0.0100928	-0.152968	0.124807	0.716566	-0.174331	0.0893667	0.738904
FLJ38723	-0.165751	91	0.116372	0.698294	0.595574	0.016704	-0.164947	0.136178	0.729385	-0.041154	0.711829	0.963955
TMEM55B	-0.218205	53	0.116495	0.698294	0.595574	0.0171216	-0.194339	0.171776	0.757312	-0.1818	0.206386	0.826745
FAM174B	-0.22481	50	0.116506	0.698294	0.595574	0.0140719	-0.197503	0.183286	0.764687	-0.28858	0.0545428	0.68506
SSX2	-0.270107	35	0.116585	0.698294	0.595574	0.0113547	-0.308987	0.0852975	0.669898	-0.245433	0.175751	0.809304
ZNF469	-0.155539	103	0.116683	0.698294	0.595574	0.0133642	-0.15727	0.127989	0.717765	-0.12414	0.230687	0.841679
MITD1	-0.162034	95	0.116696	0.698294	0.595574	0.00994036	-0.157675	0.131183	0.72397	-0.122963	0.259357	0.854618
TFIP11	-0.168436	88	0.116716	0.698294	0.595574	0.00859217	-0.135974	0.226135	0.78901	-0.228753	0.041253	0.643194
AGAP2-AS1	-0.158637	99	0.116806	0.698294	0.595574	0.0104292	-0.147679	0.160069	0.74902	-0.106207	0.31635	0.875323
TECRL	-0.161112	96	0.116846	0.698294	0.595574	0.0115907	-0.17698	0.0951755	0.684602	-0.117818	0.277111	0.863065
BC171868	-0.163702	93	0.116896	0.698294	0.595574	0.011469	-0.203445	0.0587609	0.625276	-0.227935	0.0394416	0.637912
POTED	-0.242646	43	0.116931	0.698294	0.595574	0.0117544	-0.263102	0.100947	0.689008	-0.280339	0.0721417	0.707512
GART	-0.14829	113	0.116998	0.698294	0.595574	0.0125388	-0.160263	0.104133	0.693535	-0.105188	0.290304	0.869247
SLC6A16	-0.162747	94	0.117058	0.698294	0.595574	0.0086413	-0.167332	0.119167	0.710087	-0.0694463	0.535285	0.935682
TRIM35	-0.164449	92	0.117242	0.698294	0.595574	0.00928441	-0.156629	0.147403	0.742545	-0.234132	0.0342487	0.623318
PTPN18	-0.170166	86	0.117252	0.698294	0.595574	0.0139751	-0.169068	0.141589	0.732934	-0.117732	0.311116	0.875323
NDC1	-0.156812	101	0.117342	0.698294	0.595574	0.0070166	-0.138794	0.184571	0.764898	-0.163346	0.119754	0.765481
C7	-0.145514	117	0.117485	0.698465	0.59572	0.00927382	-0.194223	0.0450062	0.589881	-0.0492833	0.615885	0.948918
SHROOM1	-0.157515	100	0.117552	0.698465	0.59572	0.00839743	-0.178524	0.0922764	0.681038	-0.0999754	0.354047	0.887486
UCHL5	-0.254636	39	0.117729	0.698465	0.59572	0.0231336	-0.237773	0.162591	0.750769	-0.324242	0.0573968	0.687096
C1orf141	-0.155843	102	0.117791	0.698465	0.59572	0.00641158	-0.146604	0.160835	0.74902	-0.134541	0.201019	0.825179
CES5A	-0.153549	105	0.11785	0.698465	0.59572	0.00646458	-0.158062	0.124028	0.715739	-0.170669	0.100042	0.74945
C12orf60	-0.164131	92	0.117962	0.698465	0.59572	0.0123942	-0.180918	0.0975219	0.685805	-0.15629	0.153182	0.795788
COMMD8	-0.172858	83	0.118118	0.698465	0.59572	0.00982962	-0.173985	0.122715	0.714613	-0.212081	0.0606036	0.692403
KCNT2	-0.166804	89	0.118206	0.698465	0.59572	0.0106108	-0.163	0.138482	0.731871	-0.0537258	0.635987	0.954596
TXNDC12	-0.184457	73	0.118233	0.698465	0.59572	0.0110121	-0.200335	0.0988431	0.688931	-0.183408	0.134363	0.782283
LOC401980	-0.164898	91	0.118289	0.698465	0.59572	0.0279021	-0.163645	0.127642	0.717765	-0.0959475	0.391177	0.900749
COMMD7	-0.189784	69	0.118313	0.698465	0.59572	0.0159099	-0.180729	0.14645	0.740078	-0.237732	0.0606347	0.692403
GAS2L2	-0.147044	114	0.118476	0.698465	0.59572	0.00561056	-0.161223	0.100375	0.689008	-0.138979	0.163592	0.80182
TTLL7	-0.153288	105	0.118483	0.698465	0.59572	0.00922055	-0.159124	0.119515	0.710817	-0.166971	0.107727	0.753807
RNASE10	-0.151099	108	0.118531	0.698465	0.59572	0.00953029	-0.164402	0.103931	0.693275	-0.192661	0.0600242	0.692403
RBM26	-0.178199	78	0.118542	0.698465	0.59572	0.00920241	-0.166275	0.153941	0.748766	-0.249296	0.037417	0.630097
KIF9	-0.154752	103	0.118568	0.698465	0.59572	0.0150016	-0.157838	0.122572	0.71446	-0.162351	0.122055	0.76906
AGO4	-0.260929	37	0.118795	0.698465	0.59572	0.0193697	-0.252541	0.143292	0.735632	-0.199014	0.259164	0.854312
STRN3	-0.172544	83	0.1188	0.698465	0.59572	0.0163934	-0.148963	0.190117	0.767344	-0.112086	0.345111	0.884404
PKD1L3	-0.159407	97	0.11885	0.698465	0.59572	0.0108324	-0.166638	0.114403	0.705865	-0.118697	0.27352	0.862864
F5	-0.145595	116	0.11889	0.698465	0.59572	0.00688969	-0.159913	0.0999009	0.688931	-0.155053	0.116033	0.760841
PRPF4B	-0.16108	95	0.118895	0.698465	0.59572	0.00712108	-0.160317	0.12901	0.720224	-0.167243	0.123775	0.770124
NACC2	-0.173564	82	0.118896	0.698465	0.59572	0.0161503	-0.175163	0.12258	0.71446	-0.17386	0.133092	0.781394
C1orf100	-0.160222	96	0.118907	0.698465	0.59572	0.00488298	-0.157563	0.142618	0.734469	-0.16974	0.113871	0.759036
DAW1	-0.156935	100	0.118926	0.698465	0.59572	0.00853728	-0.165576	0.114716	0.706375	-0.171759	0.109571	0.758828
C10orf118	-0.148859	111	0.118931	0.698465	0.59572	0.00678434	-0.118482	0.235603	0.796155	-0.144708	0.152982	0.795788
ZNF818P	-0.225657	49	0.118996	0.698533	0.595778	0.014999	-0.251039	0.104421	0.693535	-0.146813	0.335867	0.880484
MAPRE2	-0.176817	79	0.119033	0.698533	0.595778	0.00999639	-0.177408	0.120213	0.711241	-0.217044	0.069045	0.702991
PRRT3	-0.162631	93	0.119343	0.698974	0.596154	0.0132625	-0.149297	0.167538	0.754517	-0.147569	0.180384	0.814261
DEFB114	-0.210541	56	0.119345	0.698974	0.596154	0.00808205	-0.210579	0.126408	0.71756	-0.211167	0.149656	0.794589
BC087859	-0.163518	92	0.11936	0.698974	0.596154	0.0116677	-0.171931	0.117858	0.70883	-0.185607	0.0950225	0.74523
NEDD4L	-0.172269	83	0.119396	0.698974	0.596154	0.0175735	-0.154615	0.176497	0.759703	-0.162466	0.160854	0.801396
SUPT7L	-0.175508	80	0.119423	0.698974	0.596154	0.0120665	-0.179472	0.118332	0.709238	-0.0991623	0.410647	0.906757
WNT7A	-0.246974	41	0.119536	0.699415	0.59653	0.0355848	-0.239921	0.135921	0.729259	-0.298086	0.06531	0.695779
GPR89A	-0.199739	62	0.119597	0.699431	0.596544	0.0136316	-0.210273	0.106833	0.693969	-0.0969102	0.473289	0.921271
MORC2	-0.151148	107	0.120169	0.702263	0.59896	0.0115455	-0.139678	0.170147	0.756872	-0.210951	0.0391042	0.635595
DNAJC16	-0.152586	105	0.120198	0.702263	0.59896	0.00998729	-0.168796	0.0983759	0.687977	-0.186425	0.070469	0.705595
ATP2B3	-0.156399	100	0.120208	0.702263	0.59896	0.0233234	-0.139786	0.181424	0.763867	-0.0472211	0.654885	0.958389
PEAK1	-0.149007	110	0.120272	0.702374	0.599054	0.00988436	-0.152513	0.12406	0.715739	-0.150322	0.137507	0.78666
ATP6V1C1	-0.204482	59	0.120301	0.702374	0.599054	0.0256843	-0.219106	0.10152	0.689583	-0.217708	0.113783	0.759036
EVI2A	-0.153997	103	0.120397	0.702504	0.599165	0.00858706	-0.151166	0.139401	0.731871	-0.105183	0.310373	0.875323
AK125955	-0.172834	82	0.120479	0.702763	0.599386	0.00818958	-0.187968	0.106323	0.693969	-0.171972	0.137422	0.78666
MAGEC2	-0.237441	44	0.120673	0.703437	0.599961	0.00490809	-0.267413	0.10457	0.693535	-0.207279	0.187791	0.817068
GHDC	-0.148835	110	0.120706	0.703437	0.599961	0.00940459	-0.169002	0.0911269	0.678922	-0.116665	0.250149	0.849029
NLGN4Y	-0.224618	49	0.120749	0.70347	0.599989	0.0133953	-0.258699	0.0825664	0.664003	-0.227011	0.129222	0.778229
PLVAP	-0.153819	103	0.120832	0.703739	0.600218	0.00577585	-0.169094	0.101396	0.689398	-0.112362	0.286249	0.867474
C6orf1	-0.199067	62	0.120872	0.703756	0.600233	0.010178	-0.196723	0.13885	0.731871	-0.18006	0.192613	0.819333
CCDC114	-0.156813	99	0.121127	0.704722	0.601057	0.00627231	-0.15962	0.135132	0.72847	-0.114371	0.291507	0.869602
ACBD4	-0.15294	104	0.12115	0.704722	0.601057	0.00711346	-0.122544	0.234264	0.795877	-0.179984	0.0825876	0.730238
HERPUD1	-0.158302	97	0.121462	0.70581	0.601984	0.0161227	-0.157008	0.135002	0.72843	-0.106208	0.324692	0.878343
KRTAP22-2	-0.217434	52	0.121523	0.70581	0.601984	0.0268846	-0.218765	0.135214	0.72847	-0.121843	0.419868	0.911819
BIRC2	-0.155052	101	0.121566	0.705845	0.602015	0.00751258	-0.166078	0.111608	0.699251	-0.0895357	0.398666	0.90187
SP140	-0.17557	79	0.1217	0.705973	0.602124	0.00637301	-0.183567	0.125432	0.71734	-0.190595	0.11136	0.758895
GPR33	-0.161536	93	0.121887	0.706136	0.602263	0.00993471	-0.181443	0.090679	0.678922	-0.06347	0.559197	0.93862
GPR142	-0.155666	100	0.121976	0.706136	0.602263	0.00832516	-0.173641	0.0978572	0.686632	-0.113521	0.292293	0.870166
ZNF114	-0.196843	63	0.122037	0.706136	0.602263	0.00502763	-0.19865	0.138513	0.731871	-0.203547	0.136086	0.786355
CLPSL1	-0.217123	52	0.12207	0.706136	0.602263	0.0116999	-0.304883	0.0371795	0.570443	-0.139202	0.356199	0.887809
COMMD2	-0.182588	73	0.122073	0.706136	0.602263	0.0183339	-0.0639522	0.604377	0.932558	-0.224467	0.0678285	0.700188
CCDC107	-0.156406	99	0.122108	0.706136	0.602263	0.0102571	-0.144767	0.166205	0.7538	-0.134639	0.211054	0.82949
POLR1E	-0.158861	96	0.122115	0.706136	0.602263	0.00941003	-0.146729	0.165174	0.752902	-0.217234	0.0445239	0.648461
CKB	-0.214909	53	0.122256	0.706535	0.602603	0.0115941	-0.215577	0.132698	0.725626	-0.249836	0.0834025	0.730309
SNX20	-0.157935	97	0.122339	0.706535	0.602603	0.00773692	-0.155745	0.140431	0.731932	-0.119524	0.270168	0.860372
SPIC	-0.190583	67	0.122388	0.706535	0.602603	0.0103145	-0.180524	0.146916	0.741474	-0.156605	0.232116	0.842237
MEFV	-0.147422	111	0.122574	0.706535	0.602603	0.00975535	-0.164106	0.101036	0.689008	-0.130789	0.196926	0.823806
THYN1	-0.160357	94	0.122606	0.706535	0.602603	0.00945704	-0.164497	0.123454	0.71495	-0.155775	0.154558	0.796725
OR2M7	-0.262026	36	0.12264	0.706535	0.602603	0.00905327	-0.234853	0.181228	0.763722	-0.30874	0.0756337	0.715102
ZNF311	-0.188982	68	0.122725	0.706535	0.602603	0.0154766	-0.183621	0.153123	0.748082	-0.0761886	0.562872	0.93862
GPR34	-0.155348	100	0.12275	0.706535	0.602603	0.0115428	-0.151561	0.14478	0.738571	-0.0490771	0.645979	0.957629
MARK3	-0.167687	86	0.122767	0.706535	0.602603	0.0192486	-0.174041	0.11787	0.70883	-0.130438	0.251884	0.851484
MED28	-0.186117	70	0.122918	0.707188	0.60316	0.0198358	-0.185599	0.126802	0.717765	-0.215112	0.0931436	0.745176
CLEC1A	-0.159335	95	0.122996	0.707208	0.603177	0.00486629	-0.175305	0.100342	0.689008	-0.189775	0.0801031	0.725303
C11orf95	-0.160104	94	0.123206	0.708133	0.603966	0.0166864	-0.153003	0.157122	0.74902	-0.162588	0.141949	0.789172
FAM57A	-0.160928	93	0.123314	0.708133	0.603966	0.0108177	-0.16735	0.121307	0.713316	-0.162924	0.138671	0.787477
GNB3	-0.194607	64	0.123331	0.708133	0.603966	0.0202881	-0.160035	0.22192	0.788512	-0.0844276	0.532359	0.935645
SPAG16	-0.149881	107	0.123344	0.708133	0.603966	0.0101743	-0.158721	0.118522	0.709593	-0.260484	0.00997025	0.484027
ARSG	-0.148463	109	0.123394	0.708144	0.603975	0.00966264	-0.1442	0.152327	0.748053	-0.102215	0.316576	0.875323
NASP	-0.150549	106	0.12346	0.708144	0.603975	0.0104941	-0.164669	0.105167	0.693969	-0.109023	0.292941	0.870453
AQP7	-0.151259	105	0.123495	0.708144	0.603975	0.00868854	-0.163958	0.104882	0.693535	-0.0618592	0.551497	0.93789
TTLL11	-0.150481	106	0.123631	0.708375	0.604172	0.00537787	-0.150373	0.137372	0.731736	-0.128098	0.216041	0.832907
RAB9A	-0.222903	49	0.123687	0.708375	0.604172	0.024083	-0.180768	0.234705	0.795877	-0.197599	0.193223	0.819333
AX747619	-0.206255	57	0.123732	0.708375	0.604172	0.0126797	-0.195403	0.173857	0.758445	-0.234745	0.0906552	0.739137
KIN	-0.170264	83	0.123826	0.708375	0.604172	0.00677248	-0.177266	0.115708	0.706397	-0.185897	0.110305	0.758895
GPN3	-0.154822	100	0.124037	0.708375	0.604172	0.0116368	-0.158788	0.126358	0.71756	-0.131825	0.212914	0.83075
C3orf52	-0.161504	92	0.124043	0.708375	0.604172	0.00679212	-0.149394	0.174995	0.758489	-0.117119	0.291673	0.869602
CENPQ	-0.154802	100	0.124087	0.708375	0.604172	0.00731384	-0.153373	0.144389	0.738367	-0.141888	0.184719	0.816495
HHIP	-0.154779	100	0.124143	0.708375	0.604172	0.0143643	-0.165704	0.114431	0.705865	-0.130375	0.220653	0.83531
BCDIN3D	-0.159686	94	0.1242	0.708375	0.604172	0.00919359	-0.172114	0.108829	0.69634	-0.102111	0.349517	0.886019
FBXW2	-0.2098	55	0.124209	0.708375	0.604172	0.0297462	-0.209021	0.141016	0.732302	-0.208726	0.145763	0.792135
CDCA5	-0.153967	101	0.124228	0.708375	0.604172	0.0121785	-0.144304	0.165248	0.752902	-0.0890481	0.40125	0.903023
C20orf144	-0.177868	76	0.124244	0.708375	0.604172	0.0124447	-0.201286	0.0947406	0.683251	-0.22799	0.059548	0.692403
PACS2	-0.167027	86	0.124269	0.708375	0.604172	0.0123477	-0.154596	0.16287	0.750815	-0.0509559	0.659858	0.959021
USP5	-0.169028	84	0.124284	0.708375	0.604172	0.0180265	-0.172939	0.120252	0.711241	-0.14807	0.208025	0.826745
POLR2M	-0.18401	71	0.124508	0.709173	0.604853	0.0114008	-0.197592	0.108985	0.69634	-0.205965	0.114378	0.75941
HSPBAP1	-0.151575	104	0.124545	0.709173	0.604853	0.00501041	-0.155895	0.1314	0.72397	-0.130475	0.210045	0.828458
GPR132	-0.155394	99	0.124573	0.709173	0.604853	0.0150251	-0.163442	0.123744	0.715739	-0.0455622	0.671582	0.960763
FANCG	-0.145921	112	0.124737	0.709677	0.605283	0.00761305	-0.161699	0.101028	0.689008	-0.134813	0.176713	0.810044
GAGE12D	-0.240579	42	0.124854	0.709775	0.605367	0.0197611	-0.284227	0.0794959	0.65715	-0.244142	0.139629	0.787477
GALNT14	-0.148543	108	0.124964	0.709775	0.605367	0.0125588	-0.139311	0.164707	0.75289	-0.178599	0.0800675	0.725303
RNH1	-0.161999	91	0.12499	0.709775	0.605367	0.0198718	-0.170384	0.123557	0.715087	-0.0976848	0.382617	0.897724
FSD2	-0.14648	111	0.125009	0.709775	0.605367	0.0152878	-0.133781	0.180081	0.761917	-0.0666375	0.505761	0.930055
CTTNBP2NL	-0.14992	106	0.125054	0.709775	0.605367	0.0136587	-0.136894	0.178905	0.761411	-0.110642	0.280638	0.864852
AK127555	-0.190664	66	0.125159	0.709785	0.605375	0.0102735	-0.175541	0.168784	0.755364	-0.120379	0.359576	0.888747
NAIF1	-0.170712	82	0.125176	0.709785	0.605375	0.00861814	-0.18574	0.103498	0.692342	-0.176417	0.130011	0.778229
ARL2	-0.211234	54	0.125206	0.709785	0.605375	0.0220361	-0.206994	0.140921	0.7321	-0.136468	0.344661	0.884362
TTI1	-0.147655	109	0.125473	0.710596	0.606067	0.0164322	-0.117715	0.238673	0.798011	-0.0997382	0.331051	0.879168
LOC147646	-0.158292	95	0.125499	0.710596	0.606067	0.00919121	-0.167899	0.115777	0.706397	-0.0931384	0.390871	0.900597
CPPED1	-0.149561	106	0.125971	0.710984	0.606397	0.00885338	-0.18166	0.0719323	0.646611	-0.18824	0.06923	0.702991
ESPNP	-0.172455	80	0.126093	0.710987	0.6064	0.0139636	-0.168738	0.142378	0.734027	-0.179157	0.126682	0.775997
DEAF1	-0.172419	80	0.126174	0.711204	0.606585	0.01415	-0.147347	0.213496	0.785252	-0.220728	0.0605776	0.692403
MTFR2	-0.150917	104	0.126207	0.711204	0.606585	0.00985571	-0.14151	0.166784	0.754517	-0.119902	0.24969	0.848179
[truncated: 8,483 more rows]

## Sheet: 3L (PC1) Positive Correlations
	Rho	N	P	Padj	qval	SubtreeVariance	nomarineRho	nomarineP	nomarinePadj	nobatnmrRho	nobatnmrP	nobatnmrPadj
OR10A4	0.474007	93	1.59182e-06	0.0301491	0.0257141	0.0075894	0.486461	1.34265e-06	0.0254176	0.520974	2.71169e-07	0.00513268
ABCF3	0.441318	89	1.49835e-05	0.0815359	0.0695419	0.0115734	0.450939	1.67225e-05	0.0980082	0.45629	1.85929e-05	0.117309
SLC25A11	0.490007	69	1.92405e-05	0.0815359	0.0695419	0.0151099	0.480367	3.88973e-05	0.0980082	0.542114	3.71503e-06	0.035159
OMP	0.440876	86	2.15248e-05	0.0815359	0.0695419	0.0073855	0.452425	2.51698e-05	0.0980082	0.36448	0.00111858	0.358855
PERP	0.468039	72	3.38682e-05	0.0904663	0.0771587	0.00546804	0.508662	1.10795e-05	0.0980082	0.446846	0.000190424	0.21202
SEC14L4	0.395699	100	4.60416e-05	0.096892	0.0826391	0.00857715	0.385783	9.52206e-05	0.100146	0.383144	0.00022918	0.228312
PRKCH	0.413494	85	8.37751e-05	0.119549	0.101963	0.00700385	0.424036	7.98494e-05	0.0980082	0.459609	2.95927e-05	0.140033
COL28A1	0.383325	99	8.99212e-05	0.119549	0.101963	0.00569906	0.407847	6.00102e-05	0.0980082	0.406866	8.36202e-05	0.145608
AK5	0.374115	102	0.000107303	0.119549	0.101963	0.00812839	0.396041	8.50962e-05	0.0980082	0.373707	0.00028549	0.245625
NEB	0.354312	113	0.000118029	0.123895	0.10567	0.00398351	0.353839	0.000213141	0.169517	0.387745	5.66198e-05	0.145608
SIDT1	0.363523	105	0.000138029	0.124489	0.106177	0.010687	0.341605	0.000616104	0.23803	0.368364	0.000205329	0.215915
OR10P1	0.408914	79	0.000182887	0.144329	0.123098	0.023035	0.423762	0.000136491	0.117451	0.439364	0.000112837	0.145608
CKM	0.428532	70	0.000214706	0.156139	0.133171	0.0150148	0.478348	4.85863e-05	0.0980082	0.392851	0.00110316	0.358855
OR51G1	0.37986	88	0.000261961	0.156139	0.133171	0.0207097	0.375786	0.000427387	0.183883	0.318758	0.00372809	0.433032
OR51Q1	0.373677	91	0.000263804	0.156139	0.133171	0.00991953	0.383864	0.00028714	0.169517	0.351982	0.00110172	0.358855
DHCR24	0.397884	78	0.000309236	0.172263	0.146923	0.00852996	0.378022	0.000898096	0.249572	0.341661	0.00379487	0.435329
TTBK2	0.335833	109	0.000356922	0.182705	0.155829	0.00894746	0.33595	0.000593373	0.23803	0.400628	4.3563e-05	0.145608
ABCB4	0.338504	106	0.000386458	0.189972	0.162027	0.0063807	0.353651	0.000329583	0.17306	0.29425	0.00343886	0.423809
SLC4A1	0.324541	114	0.000426985	0.19255	0.164226	0.00572695	0.313435	0.00119598	0.272675	0.298871	0.00227842	0.410762
MYH4	0.334158	104	0.000526717	0.209739	0.178886	0.00934092	0.31612	0.00135515	0.272675	0.350134	0.000504627	0.317485
MYH16	0.409137	68	0.000531736	0.209739	0.178886	0.00675427	0.405472	0.00118786	0.272675	0.416888	0.000610706	0.317485
SLC27A1	0.33977	100	0.000543262	0.209739	0.178886	0.00790482	0.348459	0.000664178	0.242642	0.325279	0.00175841	0.408751
STRC	0.342128	98	0.000564516	0.209739	0.178886	0.0102921	0.374425	0.000255818	0.169517	0.329441	0.00183417	0.408751
TSSK6	0.450049	55	0.000565905	0.209739	0.178886	0.0399487	0.480732	0.000309488	0.169517	0.385677	0.00567357	0.464889
NEFL	0.40402	69	0.00057584	0.209739	0.178886	0.0240941	0.405681	0.000800405	0.245102	0.383529	0.00175807	0.408751
TAF15	0.359817	87	0.000619303	0.220648	0.188191	0.0158424	0.353473	0.00112383	0.272675	0.401694	0.000243267	0.228682
SV2C	0.340741	95	0.000727815	0.237669	0.202708	0.00617037	0.339134	0.00114971	0.272675	0.298347	0.00500405	0.451031
VPS26A	0.560444	32	0.000849605	0.253584	0.216281	0.0625502	0.525325	0.00201944	0.305698	0.531305	0.00251817	0.410762
SULF1	0.321889	104	0.000861916	0.253584	0.216281	0.00617282	0.337199	0.000642484	0.242642	0.330341	0.00101239	0.348409
STX1A	0.464515	48	0.000881026	0.253584	0.216281	0.0255597	0.476023	0.000949195	0.249572	0.481165	0.000711503	0.317485
PRDM12	0.483548	44	0.00088366	0.253584	0.216281	0.00953723	0.462051	0.00206691	0.305698	0.495142	0.000856872	0.326801
STX11	0.337771	93	0.000929065	0.261306	0.222868	0.00584551	0.324156	0.00219168	0.310323	0.335315	0.0018211	0.408751
TSPAN33	0.380186	72	0.000987179	0.261306	0.222868	0.0135371	0.398825	0.000755057	0.245102	0.321703	0.00897007	0.484027
KRT10	0.315199	106	0.000998303	0.261306	0.222868	0.00682799	0.320336	0.00130144	0.272675	0.334918	0.000908186	0.329243
MSRA	0.340164	90	0.00103668	0.261306	0.222868	0.00973077	0.345049	0.00130732	0.272675	0.341468	0.0015816	0.408751
MYL1	0.409802	61	0.00103893	0.261306	0.222868	0.0160436	0.448088	0.000419916	0.183883	0.435291	0.000714365	0.317485
MYBPC1	0.312032	107	0.00106839	0.261306	0.222868	0.00815226	0.306761	0.00180775	0.295021	0.3719	0.000162877	0.192684
OR51I2	0.325614	98	0.00106904	0.261306	0.222868	0.0141468	0.311831	0.00262144	0.330843	0.308516	0.00345065	0.423809
TKT	0.314301	104	0.00115701	0.267752	0.228365	0.00594062	0.315235	0.00156881	0.294051	0.323123	0.00149043	0.408751
SPTB	0.302768	112	0.0011755	0.267752	0.228365	0.00800384	0.304597	0.00175829	0.295021	0.329665	0.000761337	0.320235
FEM1C	0.493791	40	0.00120347	0.26816	0.228714	0.0198773	0.487791	0.00163303	0.294849	0.383897	0.0208078	0.558038
XKR4	0.35277	81	0.00123746	0.272529	0.23244	0.0129061	0.34508	0.00211539	0.305698	0.286117	0.0148316	0.52285
NUDCD2	0.576012	28	0.00133816	0.276718	0.236013	0.0279283	0.558071	0.00248709	0.326093	0.519357	0.00462279	0.451031
LOXHD1	0.297153	113	0.00139262	0.277645	0.236803	0.00844093	0.302758	0.0016077	0.294849	0.280412	0.00430877	0.451031
MYH13	0.312456	101	0.00146718	0.283555	0.241844	0.0109852	0.371397	0.000247149	0.169517	0.298436	0.0040617	0.444552
MYH1	0.31467	99	0.0015131	0.289477	0.246894	0.0094507	0.332426	0.00128468	0.272675	0.347516	0.000790817	0.32528
PNKD	0.361215	74	0.00156758	0.291152	0.248323	0.0201859	0.364753	0.00190601	0.300689	0.338412	0.0047625	0.451031
PFKM	0.318203	96	0.00158068	0.291152	0.248323	0.0108667	0.325078	0.00188163	0.299337	0.261271	0.0145115	0.521203
DSC1	0.294823	112	0.00160192	0.291152	0.248323	0.00880208	0.281856	0.00374777	0.35298	0.256927	0.00986736	0.484027
CHPF	0.314037	97	0.00173353	0.291152	0.248323	0.011903	0.324024	0.00172881	0.294849	0.256927	0.015673	0.531995
RAB12	0.50351	36	0.0017454	0.291152	0.248323	0.0227323	0.591053	0.000232629	0.169517	0.501769	0.00249921	0.410762
ZNF7	0.322888	91	0.0017985	0.294081	0.250822	0.0112478	0.350051	0.00109805	0.272675	0.305787	0.00550092	0.463691
KRTAP10-2	0.365861	70	0.00184168	0.298132	0.254276	0.00505183	0.365224	0.00277629	0.339084	0.336204	0.00660407	0.46893
CTRB1	0.306161	100	0.00194922	0.307195	0.262006	0.0117795	0.289368	0.00445248	0.36728	0.287006	0.00639206	0.46893
MYO6	0.300966	103	0.00200728	0.307195	0.262006	0.00589467	0.336873	0.000740883	0.245102	0.25684	0.0129471	0.506327
ATP11B	0.302032	102	0.00203434	0.307195	0.262006	0.010084	0.300076	0.0028244	0.339977	0.282331	0.00639703	0.46893
TAAR2	0.30614	99	0.00205813	0.307195	0.262006	0.0102456	0.296216	0.00374538	0.35298	0.266272	0.011189	0.488854
OR51A2	0.325381	87	0.00210361	0.307195	0.262006	0.0272744	0.326393	0.00276563	0.339084	0.308501	0.00599628	0.46893
RYR1	0.296175	105	0.00215718	0.307195	0.262006	0.00616908	0.312923	0.00170561	0.294849	0.267943	0.00830637	0.477881
OR51G2	0.313185	93	0.00223799	0.308866	0.263431	0.0145293	0.300135	0.00473673	0.367768	0.321187	0.0028921	0.415116
OR52E6	0.321717	88	0.00223925	0.308866	0.263431	0.019119	0.310206	0.00482726	0.368422	0.320449	0.00333479	0.420806
AMPD3	0.29871	102	0.0022916	0.308866	0.263431	0.00910067	0.295545	0.00364059	0.351475	0.298425	0.00406316	0.444552
TEAD2	0.358255	70	0.00232548	0.308866	0.263431	0.019936	0.311132	0.0109967	0.446253	0.301196	0.0139894	0.521066
GSC	0.40586	54	0.00232772	0.308866	0.263431	0.0249113	0.414654	0.00224088	0.312211	0.232899	0.111154	0.758895
HEBP2	0.309903	94	0.0023687	0.308866	0.263431	0.0106272	0.308822	0.00341697	0.351475	0.277059	0.0102584	0.484027
VSIG8	0.293515	105	0.00237472	0.308866	0.263431	0.004268	0.350667	0.000373014	0.176538	0.278807	0.00650566	0.46893
PTPRM	0.332648	81	0.00241167	0.308866	0.263431	0.00726486	0.375373	0.000708107	0.243731	0.340604	0.00298346	0.415116
CA3	0.31006	93	0.00248975	0.308866	0.263431	0.0101709	0.302717	0.00414753	0.363532	0.329418	0.00221476	0.410762
TTN	0.280634	114	0.00249169	0.308866	0.263431	0.00942244	0.258235	0.00752531	0.407557	0.373517	0.000101848	0.145608
OR8D4	0.311463	92	0.00250986	0.308866	0.263431	0.0175068	0.300061	0.00474758	0.367768	0.257653	0.0186937	0.555365
ETV4	0.311054	92	0.00254471	0.308866	0.263431	0.00584961	0.314561	0.00283748	0.339977	0.280836	0.0101196	0.484027
IMP3	0.38727	58	0.00267068	0.310837	0.265113	0.0199509	0.376048	0.00362408	0.351475	0.37321	0.00544329	0.463691
PPP1R13L	0.321651	85	0.00268413	0.310837	0.265113	0.00850888	0.320655	0.00331344	0.351475	0.328891	0.00372149	0.433032
AKR7A2	0.298051	99	0.00273259	0.310837	0.265113	0.00694191	0.329694	0.00125015	0.272675	0.259502	0.0135146	0.516352
KRT17	0.297773	99	0.002759	0.310837	0.265113	0.00626981	0.321363	0.0017868	0.295021	0.365522	0.000427841	0.317271
ATP13A3	0.28275	110	0.00276293	0.310837	0.265113	0.0181845	0.261813	0.00785767	0.411594	0.26939	0.00700934	0.46893
GLDN	0.282643	110	0.00277357	0.310837	0.265113	0.00766607	0.278642	0.00477898	0.367768	0.234802	0.0199528	0.556891
OR51E1	0.318977	85	0.00292589	0.311976	0.266084	0.014384	0.322695	0.00350735	0.351475	0.295339	0.00911684	0.484027
MC5R	0.302011	95	0.00293511	0.311976	0.266084	0.0251207	0.32833	0.00178999	0.295021	0.373155	0.000371273	0.292811
OLFML1	0.283513	108	0.00294585	0.311976	0.266084	0.00650902	0.279841	0.00439162	0.36728	0.329706	0.000974268	0.341499
CASD1	0.313101	88	0.00297589	0.311976	0.266084	0.0120553	0.329595	0.00249653	0.326093	0.284803	0.0104513	0.484027
USH1C	0.285601	106	0.00300091	0.311976	0.266084	0.0103228	0.282843	0.00523452	0.375603	0.273641	0.00698204	0.46893
FABP4	0.349664	70	0.00300627	0.311976	0.266084	0.00529161	0.349104	0.003786	0.354815	0.332518	0.00726226	0.46893
EPHA3	0.302783	94	0.00301434	0.311976	0.266084	0.0112739	0.312659	0.00301895	0.350209	0.279085	0.0106186	0.484882
OR4D11	0.302282	94	0.0030652	0.313324	0.267234	0.0142397	0.297882	0.00458039	0.36728	0.362442	0.000652592	0.317485
PDCD5	0.492248	34	0.00310475	0.313324	0.267234	0.0511732	0.512122	0.00322746	0.351475	0.420592	0.0165327	0.537923
ANK1	0.28546	105	0.00315971	0.313324	0.267234	0.0140219	0.272687	0.00750636	0.407557	0.310267	0.00209472	0.408751
FMO6P	0.287703	103	0.00321078	0.313603	0.267472	0.0122333	0.299125	0.00291742	0.345185	0.309482	0.00253905	0.410762
RYR3	0.289044	102	0.00321507	0.313603	0.267472	0.00908227	0.282349	0.00531728	0.375603	0.319255	0.0019227	0.408751
ALOX12B	0.294617	98	0.00323174	0.313603	0.267472	0.00898172	0.301779	0.00346154	0.351475	0.301025	0.00460847	0.451031
APOE	0.29151	100	0.00325425	0.313603	0.267472	0.00335745	0.284364	0.00547434	0.38101	0.256487	0.0152567	0.52987
OR51L1	0.29682	96	0.0033181	0.313603	0.267472	0.0123766	0.282924	0.00689284	0.407557	0.308609	0.00384061	0.437923
PYGM	0.312769	86	0.00336796	0.313603	0.267472	0.00722065	0.321998	0.00404169	0.363532	0.347695	0.00181393	0.408751
RAB2B	0.399119	52	0.00337884	0.313603	0.267472	0.0328457	0.346583	0.0136753	0.475896	0.326137	0.025271	0.585191
PRKAA2	0.347748	69	0.00341358	0.313603	0.267472	0.0159809	0.34984	0.00398433	0.363532	0.352993	0.00489119	0.451031
OTOGL	0.270622	115	0.00344257	0.313603	0.267472	0.00672834	0.275171	0.00430651	0.36728	0.282075	0.00371981	0.433032
KRTAP19-1	0.349914	68	0.003444	0.313603	0.267472	0.011467	0.380442	0.00209977	0.305698	0.31422	0.0114512	0.493732
LONRF1	0.34888	68	0.00354757	0.31994	0.272877	0.0158024	0.420515	0.000666494	0.242642	0.325784	0.0125751	0.500376
ADSS	0.333801	74	0.00365575	0.324871	0.277082	0.0164672	0.332409	0.00462244	0.36728	0.378315	0.00146794	0.408751
LRFN5	0.310049	86	0.00367066	0.324871	0.277082	0.0104818	0.315492	0.00411834	0.363532	0.277994	0.0131168	0.507646
CPSF6	0.557093	25	0.00381833	0.330593	0.281963	0.0458272	0.525358	0.00700046	0.407557	0.571324	0.00547894	0.463691
DENND5A	0.317069	81	0.00392561	0.331144	0.282432	0.0141551	0.343944	0.00219312	0.310323	0.272048	0.0207892	0.558038
ABCA12	0.270442	112	0.00392753	0.331144	0.282432	0.00795395	0.294222	0.0024324	0.326093	0.2668	0.00671489	0.46893
KRT74	0.27	112	0.00398904	0.334302	0.285126	0.0163786	0.262111	0.00691137	0.407557	0.20698	0.0388089	0.633254
ALDH1B1	0.286338	99	0.0040625	0.334768	0.285523	0.00783459	0.276034	0.00808585	0.412633	0.259841	0.0144923	0.521203
SLC12A1	0.276654	106	0.00409418	0.335687	0.286307	0.0110916	0.289934	0.00360311	0.351475	0.28784	0.00467669	0.451031
ADAM23	0.285761	99	0.00414103	0.337227	0.287621	0.00759256	0.292766	0.00462498	0.36728	0.328668	0.00156265	0.408751
FTH1	0.350859	65	0.0041631	0.337227	0.287621	0.0150071	0.323046	0.0104383	0.442603	0.334559	0.00960009	0.484027
ZNF569	0.316829	80	0.00419164	0.337227	0.287621	0.0205101	0.329293	0.00391679	0.361701	0.233226	0.0486513	0.662497
PAIP2	0.712635	14	0.00423187	0.337227	0.287621	0.174256	0.714044	0.00412291	0.363532	0.70883	0.00985705	0.484027
TRHDE	0.288966	95	0.00451045	0.341697	0.291433	0.0092365	0.293772	0.00520291	0.375603	0.260626	0.0166465	0.537954
TMPRSS7	0.283046	99	0.0045283	0.341697	0.291433	0.0111499	0.275313	0.00723876	0.407557	0.303514	0.00327031	0.418246
LOX	0.306443	84	0.00458168	0.343152	0.292674	0.0163579	0.357515	0.00131162	0.272675	0.280391	0.0148276	0.52285
SCAMP2	0.308232	83	0.00458382	0.343152	0.292674	0.0178396	0.29472	0.00881046	0.426575	0.270895	0.0195704	0.555365
PRKAB1	0.389727	51	0.00469974	0.346676	0.295679	0.0193868	0.386127	0.00671496	0.407557	0.308196	0.0418181	0.644609
TNFAIP3	0.265183	112	0.00471733	0.346676	0.295679	0.00597682	0.26472	0.00688789	0.407557	0.328886	0.000738025	0.317485
KRT28	0.269836	108	0.00474036	0.346676	0.295679	0.0140883	0.25955	0.00843029	0.418381	0.269733	0.00786849	0.471313
SERPINF1	0.268611	109	0.00474071	0.346676	0.295679	0.00593266	0.258822	0.0089636	0.431124	0.268645	0.00688109	0.46893
OR6K6	0.275428	103	0.00486476	0.354379	0.302249	0.0131432	0.281128	0.00528081	0.375603	0.300828	0.0035705	0.425047
DUOX1	0.263627	112	0.0049769	0.358048	0.305379	0.0117309	0.271646	0.00485081	0.368422	0.300692	0.00224808	0.410762
SPRR2F	0.360777	59	0.00499898	0.358048	0.305379	0.0162954	0.365399	0.00561967	0.38827	0.343397	0.0118218	0.497415
CILP	0.261145	114	0.00500965	0.358048	0.305379	0.00703889	0.25619	0.00773249	0.411594	0.223707	0.0238083	0.576398
PSAPL1	0.310713	80	0.00502925	0.358097	0.305421	0.0159861	0.309675	0.00811843	0.412633	0.418932	0.000306826	0.252504
KRT2	0.275421	102	0.00508288	0.359655	0.306749	0.00622238	0.270049	0.00747083	0.407557	0.293532	0.00498659	0.451031
KIAA1147	0.322263	74	0.00510809	0.359655	0.306749	0.0125681	0.381361	0.00122469	0.272675	0.302959	0.0120299	0.499766
OR4C16	0.331946	69	0.00532874	0.369215	0.314903	0.0231196	0.326662	0.00791167	0.411594	0.42534	0.000568532	0.317485
TRPM4	0.269987	105	0.00534698	0.369215	0.314903	0.00726705	0.252703	0.0125164	0.460307	0.262759	0.0105101	0.484027
DSC3	0.266113	108	0.00537378	0.369215	0.314903	0.00609115	0.267301	0.00747989	0.407557	0.26541	0.00860416	0.484027
ACSS3	0.277737	99	0.00538033	0.369215	0.314903	0.0175414	0.248141	0.0170804	0.486972	0.263603	0.0130823	0.507646
TWF1	0.311827	78	0.00544973	0.370295	0.315824	0.00838568	0.309434	0.00690457	0.407557	0.251274	0.0358832	0.624205
ATP2A1	0.274536	101	0.00546431	0.370295	0.315824	0.00502086	0.276735	0.00724641	0.407557	0.313106	0.00224405	0.410762
CPNE8	0.366303	56	0.00549382	0.370295	0.315824	0.0209651	0.369877	0.00695844	0.407557	0.338477	0.0122984	0.499766
CRCT1	0.33994	65	0.00559642	0.370899	0.316339	0.00862475	0.36813	0.00446701	0.36728	0.318429	0.0123833	0.499766
TMC1	0.291262	89	0.00561888	0.370899	0.316339	0.00903848	0.297625	0.0059685	0.397851	0.331092	0.00253476	0.410762
IGSF9B	0.26972	104	0.00562492	0.370899	0.316339	0.0131139	0.288227	0.00440303	0.36728	0.221365	0.0320193	0.614956
OR51S1	0.27215	102	0.00565499	0.370899	0.316339	0.015617	0.266246	0.00838938	0.418381	0.248071	0.0171127	0.537954
KLF9	0.389577	49	0.00565944	0.370899	0.316339	0.0374046	0.407188	0.00407452	0.363532	0.264976	0.0785627	0.721512
OR51A4	0.308017	79	0.00575253	0.373282	0.318372	0.021034	0.297646	0.00856403	0.422384	0.265186	0.0243685	0.580648
ZEB1	0.26749	105	0.00580483	0.373282	0.318372	0.00932323	0.30733	0.00208233	0.305698	0.228364	0.0252309	0.585191
FTL	0.330861	68	0.00585401	0.373282	0.318372	0.0210105	0.339207	0.00610701	0.39805	0.335686	0.00817452	0.477312
COL9A1	0.258843	112	0.0058561	0.373282	0.318372	0.00834878	0.283805	0.00350526	0.351475	0.303581	0.00202763	0.408751
TNMD	0.339125	64	0.00612017	0.375141	0.319958	0.0170671	0.324183	0.010809	0.442603	0.19531	0.141765	0.789172
ATP5B	0.313712	75	0.00612996	0.375141	0.319958	0.0181455	0.324497	0.00576496	0.391123	0.3641	0.00245445	0.410762
OR4C15	0.302015	81	0.00614035	0.375141	0.319958	0.0176364	0.283449	0.0119119	0.454466	0.354682	0.00193116	0.408751
AK308605	0.415933	42	0.00615226	0.375141	0.319958	0.0372424	0.426759	0.00602943	0.39805	0.438756	0.00520419	0.451858
UNC13C	0.257864	111	0.00628786	0.375141	0.319958	0.0106431	0.278366	0.00461233	0.36728	0.223059	0.0235259	0.572364
CHAC2	0.310732	76	0.00629538	0.375141	0.319958	0.00658203	0.330165	0.00524874	0.375603	0.222892	0.0636418	0.694934
OR1M1	0.348802	60	0.006308	0.375141	0.319958	0.00458556	0.290487	0.0314403	0.550486	0.348203	0.0114194	0.493484
ZDHHC23	0.267417	103	0.00631838	0.375141	0.319958	0.0106513	0.279683	0.00578492	0.391123	0.263415	0.00990335	0.484027
CAPN5	0.263272	105	0.00665795	0.383991	0.327505	0.00818406	0.25348	0.0127063	0.462816	0.244481	0.0175598	0.543979
FXR1	0.432312	38	0.0067167	0.383991	0.327505	0.0433033	0.454325	0.00537733	0.37703	0.407721	0.0135754	0.516352
OR51F1	0.266732	102	0.00672945	0.383991	0.327505	0.0190735	0.24638	0.015528	0.484251	0.292095	0.00472418	0.451031
CAPN1	0.277926	93	0.00698968	0.389426	0.332141	0.0108967	0.276631	0.00992712	0.436424	0.320896	0.00309828	0.415116
CES4A	0.310786	74	0.00703765	0.389426	0.332141	0.0287142	0.323156	0.00718949	0.407557	0.300462	0.014236	0.521203
SIPA1L3	0.259116	107	0.00703823	0.389426	0.332141	0.00712721	0.257823	0.00924115	0.434046	0.239482	0.0187733	0.555365
ZNF880	0.459964	33	0.00707659	0.389426	0.332141	0.00760488	0.473895	0.00815844	0.412961	0.481157	0.00530553	0.458552
OR5L1	0.296609	81	0.00717119	0.391419	0.333841	0.00836835	0.298799	0.00921454	0.433931	0.296615	0.00927345	0.484027
RNF123	0.264423	102	0.00723991	0.39378	0.335855	0.009827	0.25901	0.0104145	0.442603	0.19973	0.0549258	0.68592
OSBPL3	0.253013	111	0.00737934	0.394503	0.336472	0.0162696	0.253106	0.00989321	0.436424	0.302737	0.00232103	0.410762
OR4L1	0.30297	77	0.00739912	0.394503	0.336472	0.0105673	0.291654	0.0129277	0.464391	0.258133	0.029747	0.600274
KIF5A	0.295344	81	0.00743343	0.394503	0.336472	0.0153529	0.307735	0.00647697	0.406459	0.30197	0.00892897	0.484027
CTXN2	0.457457	33	0.00743599	0.394503	0.336472	0.0163686	0.47588	0.0068111	0.407557	0.404097	0.0267803	0.591925
PIGU	0.300431	78	0.00752798	0.396055	0.337795	0.0135715	0.299647	0.0105537	0.442603	0.255861	0.0300596	0.600909
LPIN3	0.250526	112	0.00771718	0.401762	0.342663	0.00680552	0.244143	0.0125036	0.460307	0.287454	0.00356027	0.425047
CTXN1	0.551561	22	0.00779121	0.401762	0.342663	0.0367805	0.555362	0.00729296	0.407557	0.493144	0.0231125	0.570692
RASGRP2	0.285087	85	0.00817924	0.412088	0.351469	0.0092147	0.293254	0.00871869	0.424302	0.298083	0.00846261	0.482471
LRRC38	0.295312	79	0.00823802	0.412088	0.351469	0.0175119	0.263043	0.0226036	0.520571	0.282728	0.0168949	0.537954
STAM	0.27688	90	0.00824525	0.412088	0.351469	0.00804603	0.288915	0.00697837	0.407557	0.272388	0.013297	0.511555
MGAT4B	0.319427	67	0.00841785	0.412223	0.351585	0.0200055	0.312299	0.013468	0.472152	0.249644	0.0544006	0.68506
FMO3	0.252912	107	0.00858153	0.412499	0.35182	0.0077843	0.244723	0.0156983	0.484251	0.191835	0.0571457	0.687068
PAK6	0.260211	101	0.00858968	0.412499	0.35182	0.00859845	0.249565	0.0142015	0.479322	0.251599	0.0155498	0.531131
GATA2	0.32075	66	0.00864533	0.412499	0.35182	0.0191459	0.351844	0.0050423	0.374336	0.360033	0.00471974	0.451031
L3MBTL4	0.256257	104	0.00864637	0.412499	0.35182	0.0101335	0.248217	0.0147505	0.479322	0.216998	0.037733	0.631486
NIPSNAP1	0.317406	67	0.00886426	0.415098	0.354036	0.0125051	0.335163	0.00678435	0.407557	0.280209	0.0273939	0.591925
LRRC29	0.255243	104	0.00892313	0.416047	0.354846	0.0156055	0.294906	0.00353655	0.351475	0.25207	0.0132283	0.509949
OR6Q1	0.273753	90	0.0090325	0.416047	0.354846	0.00769723	0.270208	0.0129255	0.464391	0.286576	0.0090486	0.484027
KRT32	0.246748	111	0.00903509	0.416047	0.354846	0.00662337	0.249929	0.0112966	0.449696	0.24301	0.0143396	0.521203
ASB13	0.287547	81	0.00924324	0.42049	0.358636	0.0103871	0.291105	0.0107339	0.442603	0.246405	0.0343179	0.623318
MPP2	0.315697	67	0.00925789	0.42049	0.358636	0.0198916	0.328539	0.00754049	0.407557	0.270187	0.0322254	0.614956
GBAS	0.290639	79	0.0093651	0.421188	0.359231	0.0164304	0.308669	0.00630869	0.402141	0.372099	0.00128856	0.38714
ETV5	0.286534	81	0.00950465	0.423572	0.361264	0.013866	0.273548	0.0153793	0.48339	0.253722	0.0291635	0.600274
CREB1	0.506648	25	0.00975103	0.427835	0.3649	0.0261363	0.4746	0.0165233	0.484958	0.389467	0.0599456	0.692403
MUC5B	0.408855	39	0.00975843	0.427835	0.3649	0.00979409	0.436931	0.0110084	0.446253	0.376117	0.021775	0.563695
NEFM	0.253285	103	0.00983936	0.427966	0.365012	0.00903162	0.232882	0.0231394	0.526334	0.253091	0.014377	0.521203
SLC1A1	0.253211	103	0.00986138	0.427966	0.365012	0.0118645	0.243585	0.0167793	0.485802	0.274681	0.00770886	0.469175
SYT16	0.250641	105	0.0099126	0.427966	0.365012	0.00879361	0.250026	0.0135146	0.472268	0.228227	0.0253207	0.585191
MTNR1A	0.265947	93	0.0099779	0.427966	0.365012	0.00719751	0.279726	0.00830402	0.418094	0.301574	0.00559492	0.464444
CEACAM16	0.251522	104	0.0100072	0.427966	0.365012	0.00941989	0.261048	0.00980477	0.436424	0.206669	0.0480879	0.660547
VIL1	0.244596	110	0.0100158	0.427966	0.365012	0.00460255	0.249898	0.0113071	0.449696	0.288093	0.00401943	0.444552
TMCC3	0.269567	90	0.0101893	0.427966	0.365012	0.00946208	0.253278	0.0193452	0.496113	0.23336	0.0360257	0.624205
OR6Y1	0.266316	92	0.0102877	0.428046	0.36508	0.0113671	0.278021	0.00998698	0.436636	0.248707	0.0242533	0.580004
MYO5A	0.255416	100	0.0103255	0.428046	0.36508	0.0118028	0.258762	0.012753	0.462816	0.225537	0.030647	0.603384
KRT16P2	0.270488	89	0.0103567	0.428046	0.36508	0.0107112	0.265249	0.0153731	0.48339	0.275366	0.0128436	0.504139
CSNK1E	0.41074	38	0.0104207	0.428046	0.36508	0.0144803	0.411289	0.0114409	0.450893	0.293464	0.0870803	0.736814
SRCIN1	0.26328	93	0.0107786	0.428046	0.36508	0.0104069	0.255887	0.0167472	0.485802	0.242646	0.0261543	0.591925
TAL1	0.344313	54	0.0107893	0.428046	0.36508	0.0331815	0.33567	0.0196789	0.500056	0.317537	0.0231734	0.571128
OR2AG2	0.287186	78	0.0107923	0.428046	0.36508	0.00992142	0.276129	0.0188811	0.492659	0.286803	0.0160768	0.531995
OR4Q3	0.280132	82	0.0108027	0.428046	0.36508	0.0165376	0.266008	0.0178119	0.490266	0.283969	0.014904	0.523381
SLC5A4	0.247687	105	0.0108502	0.428046	0.36508	0.0271607	0.245131	0.0149833	0.479322	0.264167	0.0105063	0.484027
ADH7	0.285116	79	0.0108693	0.428046	0.36508	0.0108784	0.282746	0.014651	0.479322	0.367932	0.00186884	0.408751
MRGPRE	0.321228	62	0.0109048	0.428046	0.36508	0.0170085	0.327204	0.0138351	0.477942	0.353725	0.00748642	0.469175
NF2	0.326411	60	0.010918	0.428046	0.36508	0.026136	0.308028	0.0186569	0.491077	0.294507	0.0290644	0.600274
LDLRAD4	0.296186	73	0.0109496	0.428046	0.36508	0.0164407	0.31147	0.00918351	0.433931	0.292849	0.0170222	0.537954
PGLYRP1	0.255848	98	0.0109987	0.428046	0.36508	0.00574019	0.251816	0.017287	0.489652	0.238068	0.0263872	0.591925
KRTAP2-4	0.306507	68	0.0110168	0.428046	0.36508	0.00915474	0.321824	0.00950783	0.436424	0.380824	0.00207632	0.408751
GSX1	0.36008	49	0.0110419	0.428046	0.36508	0.0166742	0.345201	0.0187951	0.492129	0.296072	0.051012	0.674012
ELF5	0.29176	75	0.0110917	0.428046	0.36508	0.0114709	0.297369	0.0117871	0.454466	0.233942	0.0548449	0.68592
ADK	0.262048	93	0.011167	0.428046	0.36508	0.0133383	0.270445	0.0108216	0.442603	0.240676	0.0274324	0.591925
ALOX5	0.248626	103	0.011329	0.428046	0.36508	0.00687776	0.277469	0.0062007	0.400458	0.22871	0.0266071	0.591925
LYPLA2	0.455774	30	0.0113686	0.428046	0.36508	0.0624871	0.38905	0.0448867	0.589881	0.493519	0.00761221	0.469175
MYBPC2	0.246989	104	0.011483	0.428046	0.36508	0.00601254	0.234009	0.023204	0.526334	0.259273	0.0125711	0.500376
UPK3A	0.255552	97	0.0115249	0.428046	0.36508	0.00764484	0.233843	0.0248661	0.529794	0.24877	0.020154	0.557005
KRTAP7-1	0.296064	72	0.0115663	0.428046	0.36508	0.0112426	0.274964	0.025457	0.529794	0.366169	0.00249704	0.410762
ZDHHC9	0.318625	62	0.0116043	0.428046	0.36508	0.010389	0.330848	0.00982334	0.436424	0.326586	0.0140259	0.521066
GLRA1	0.38112	43	0.0116857	0.428046	0.36508	0.0285199	0.408251	0.00805391	0.412633	0.300887	0.0592126	0.690984
UNC13B	0.257467	95	0.011773	0.428046	0.36508	0.0144113	0.252943	0.0161575	0.484251	0.317535	0.00257334	0.412781
RNF222	0.280108	80	0.0118519	0.428046	0.36508	0.00745783	0.292085	0.0127889	0.462919	0.277686	0.0199421	0.556891
DAB1	0.287127	76	0.0119092	0.428046	0.36508	0.0136168	0.314941	0.00747108	0.407557	0.211777	0.0829705	0.730309
EGR3	0.393769	40	0.0119393	0.428046	0.36508	0.0242524	0.387919	0.0146816	0.479322	0.361062	0.0281252	0.596627
CLK4	0.288917	75	0.0119395	0.428046	0.36508	0.0115554	0.3151	0.00788624	0.411594	0.255304	0.035622	0.624205
MTMR7	0.259704	93	0.01194	0.428046	0.36508	0.00833808	0.260148	0.0149552	0.479322	0.280916	0.00964214	0.484027
CHMP4B	0.342835	53	0.0119699	0.428046	0.36508	0.0319227	0.308801	0.0274679	0.53774	0.173454	0.233304	0.842237
COL14A1	0.237764	111	0.0119781	0.428046	0.36508	0.00298169	0.241361	0.0140464	0.479322	0.285944	0.00411594	0.447739
OR52D1	0.251084	99	0.0121822	0.431666	0.368167	0.0119759	0.253578	0.0141838	0.479322	0.252499	0.0169766	0.537954
KRT85	0.250909	99	0.0122447	0.432675	0.369029	0.00519753	0.282674	0.00633025	0.402141	0.262905	0.012298	0.499766
DPPA5	0.351602	50	0.0122858	0.433319	0.369577	0.0112988	0.372425	0.011757	0.454466	0.328557	0.0275539	0.591925
TOMM40	0.297284	70	0.0124454	0.433618	0.369833	0.0243603	0.28282	0.0194451	0.496113	0.227081	0.0759123	0.715224
KRTAP5-1	0.442432	31	0.0126931	0.436268	0.372093	0.0105718	0.4426	0.0126554	0.46251	0.471731	0.0129874	0.506859
TGM1	0.23743	109	0.0129215	0.439569	0.374908	0.00761214	0.243729	0.0150547	0.479322	0.297767	0.00305496	0.415116
KRT16	0.235261	111	0.0129349	0.439569	0.374908	0.00794915	0.26002	0.00798984	0.41261	0.241175	0.015116	0.526915
LRRC10B	0.301945	67	0.0130181	0.44083	0.375984	0.0219335	0.327675	0.00994082	0.436424	0.267971	0.0337233	0.619574
EPHB6	0.240103	106	0.0131721	0.44301	0.377843	0.00681279	0.250304	0.0129263	0.464391	0.229277	0.0246372	0.580802
ZMAT2	0.586491	17	0.0133397	0.444031	0.378714	0.111194	0.615809	0.0110931	0.447729	0.55563	0.0205745	0.558038
KRT83	0.243947	102	0.0134798	0.446185	0.38055	0.0118441	0.240448	0.0189194	0.492659	0.316998	0.00207852	0.408751
KRT75	0.233796	111	0.0135251	0.446185	0.38055	0.00897705	0.251213	0.0108703	0.443503	0.255967	0.0101564	0.484027
DMXL2	0.238246	106	0.0139197	0.448381	0.382424	0.0096878	0.244843	0.0156458	0.484251	0.202993	0.047304	0.659239
OR51B2	0.259729	89	0.0139723	0.448381	0.382424	0.0218494	0.250793	0.0206076	0.506122	0.2746	0.0137003	0.516686
OR5R1	0.255414	92	0.0140005	0.448381	0.382424	0.013441	0.260217	0.0149275	0.479322	0.258922	0.0180995	0.549909
PPID	0.262497	87	0.0140403	0.448381	0.382424	0.00761723	0.269416	0.014379	0.479322	0.27645	0.0142828	0.521203
AHDC1	0.252536	94	0.0140646	0.448381	0.382424	0.00912411	0.249861	0.0182039	0.490266	0.276721	0.010355	0.484027
ARL4D	0.338053	52	0.0142416	0.448381	0.382424	0.0186891	0.332845	0.0181854	0.490266	0.299549	0.0386035	0.632483
EHD3	0.283328	74	0.0144397	0.448381	0.382424	0.0173767	0.278181	0.0188262	0.492263	0.271608	0.0261924	0.591925
PCM1	0.23059	112	0.0144446	0.448381	0.382424	0.0164477	0.224853	0.0217438	0.515574	0.23905	0.0160606	0.531995
PKIA	0.40985	35	0.0144796	0.448381	0.382424	0.028577	0.433736	0.0116774	0.454466	0.36197	0.0384555	0.631493
UNC80	0.250119	95	0.0145021	0.448381	0.382424	0.00615372	0.293838	0.0049393	0.370405	0.269037	0.0112568	0.488854
PGC	0.237948	105	0.0145147	0.448381	0.382424	0.00586192	0.23825	0.0194105	0.496113	0.268234	0.00858493	0.484027
EFR3A	0.258189	89	0.0145702	0.448381	0.382424	0.00861936	0.259834	0.0176825	0.490266	0.291694	0.00823781	0.477312
AWAT1	0.239978	103	0.0146232	0.448381	0.382424	0.00954888	0.239988	0.0185167	0.490266	0.279181	0.0067279	0.46893
TGM6	0.233201	109	0.0146722	0.448381	0.382424	0.00743533	0.241287	0.0150674	0.479322	0.258477	0.0101759	0.484027
SLC27A2	0.234186	108	0.0147101	0.448381	0.382424	0.00577576	0.221778	0.027371	0.53774	0.286346	0.00446331	0.451031
BPIFA1	0.239703	103	0.0147402	0.448381	0.382424	0.00591754	0.241397	0.0184401	0.490266	0.28473	0.00594358	0.46893
SMIM15	0.51225	22	0.0147951	0.448381	0.382424	0.0271045	0.512045	0.0148419	0.479322	0.325623	0.149748	0.794589
BPI	0.236975	105	0.0149336	0.448381	0.382424	0.011509	0.262106	0.00988759	0.436424	0.274253	0.00780838	0.470691
DNAL1	0.307779	62	0.0149527	0.448381	0.382424	0.0323831	0.340289	0.00780658	0.411594	0.336342	0.0112608	0.488854
RAPSN	0.2712	80	0.0149618	0.448381	0.382424	0.0155848	0.325309	0.00468203	0.367666	0.254931	0.0283781	0.597487
GCOM1	0.232187	109	0.0151215	0.451319	0.38493	0.00823226	0.22981	0.0214434	0.511608	0.246017	0.014104	0.521203
LGALS8-AS1	0.412725	34	0.0152744	0.452913	0.386289	0.0135034	0.408737	0.024923	0.529794	0.414259	0.0165401	0.537923
PHGDH	0.243928	98	0.0155007	0.458008	0.390635	0.0160251	0.322667	0.00170713	0.294849	0.268943	0.0112864	0.488854
SLC22A31	0.269455	80	0.0156476	0.458325	0.390905	0.00742534	0.293602	0.0111208	0.447729	0.296994	0.0101815	0.484027
KRT86	0.239835	101	0.0157058	0.458325	0.390905	0.0127346	0.223752	0.0301668	0.544655	0.310109	0.00277632	0.415116
CNFN	0.366204	43	0.0157283	0.458325	0.390905	0.0124098	0.392165	0.0112153	0.448873	0.398855	0.00979118	0.484027
WDR48	0.362038	44	0.0157393	0.458325	0.390905	0.0296558	0.383463	0.0111394	0.447729	0.334811	0.0372128	0.63002
PCDH1	0.253741	90	0.0158138	0.458325	0.390905	0.0132251	0.252327	0.0198205	0.501154	0.275831	0.0121321	0.499766
DNAJC17	0.25096	92	0.0158236	0.458325	0.390905	0.00815438	0.230792	0.0295569	0.542811	0.22461	0.0399696	0.640597
HBA2	0.2707	79	0.0158253	0.458325	0.390905	0.011871	0.271048	0.0186662	0.491077	0.223944	0.0534277	0.683133
OR51D1	0.241839	99	0.0158818	0.458325	0.390905	0.0127357	0.263625	0.0106719	0.442603	0.265812	0.0108772	0.488126
LIPN	0.239111	101	0.0160329	0.458325	0.390905	0.00759341	0.229012	0.0255925	0.529794	0.204221	0.0535168	0.683133
TCEANC2	0.261885	84	0.0161102	0.458325	0.390905	0.0124371	0.251792	0.023355	0.526334	0.166416	0.14534	0.791988
HSP90B1	0.248941	93	0.0161174	0.458325	0.390905	0.0070562	0.25687	0.0156971	0.484251	0.258231	0.0170261	0.537954
RARA	0.342079	49	0.0161367	0.458325	0.390905	0.0367487	0.360665	0.0127577	0.462816	0.316919	0.0360777	0.624205
SMAD3	0.483848	24	0.0165933	0.46218	0.394193	0.0507581	0.49796	0.0183529	0.490266	0.412098	0.0566804	0.686643
FAM107A	0.299586	63	0.0170631	0.469875	0.400756	0.0204322	0.297063	0.0223244	0.518689	0.294101	0.0277982	0.593405
CYP2B6	0.256482	86	0.0171378	0.469875	0.400756	0.00867458	0.254351	0.0236959	0.528321	0.221949	0.057361	0.687096
BAI3	0.278108	73	0.0172025	0.469875	0.400756	0.0120414	0.288626	0.0161664	0.484251	0.267621	0.0325217	0.614956
MBD5	0.250472	90	0.0172628	0.470442	0.40124	0.0143988	0.282596	0.00963887	0.436424	0.225625	0.0415387	0.644037
HSD17B4	0.229516	107	0.0174028	0.470465	0.40126	0.00580041	0.223961	0.0266301	0.533997	0.22089	0.0296865	0.600274
RPS2	0.365122	42	0.0174263	0.470465	0.40126	0.0107471	0.356904	0.0237774	0.528321	0.294066	0.0655009	0.695779
RAB33B	0.289644	67	0.0174338	0.470465	0.40126	0.0129161	0.29791	0.0168084	0.485802	0.298325	0.0195311	0.555365
ALDH6A1	0.248643	91	0.0174745	0.470465	0.40126	0.0125	0.301581	0.00530596	0.375603	0.270983	0.0144087	0.521203
FAM49B	0.621929	14	0.0175618	0.470465	0.40126	0.0221597	0.622123	0.0175164	0.490182	0.678137	0.007684	0.469175
ZNF222	0.255392	86	0.0176322	0.470465	0.40126	0.00542901	0.260609	0.0195554	0.497585	0.228231	0.0473725	0.659239
MUT	0.239261	98	0.0176564	0.470465	0.40126	0.0117983	0.228442	0.0294088	0.542811	0.281326	0.00722989	0.46893
CDK14	0.282843	70	0.0176687	0.470465	0.40126	0.0144194	0.30993	0.0119896	0.455773	0.265952	0.0351381	0.624205
FMO9P	0.333961	50	0.0177772	0.470465	0.40126	0.0309468	0.132403	0.380401	0.863753	0.334803	0.0214302	0.560262
KCNA4	0.249266	90	0.0178259	0.470465	0.40126	0.00882407	0.240798	0.0273522	0.53774	0.191155	0.0815409	0.72799
XRN2	0.254905	86	0.0178571	0.470465	0.40126	0.0111715	0.236847	0.0332637	0.559255	0.228785	0.0425548	0.647159
STIM1	0.242335	95	0.0179763	0.470465	0.40126	0.00630465	0.232094	0.0286263	0.542811	0.196382	0.071651	0.706425
VPS13C	0.222201	113	0.0180096	0.470465	0.40126	0.00790326	0.23052	0.0179907	0.490266	0.213755	0.0309889	0.603667
TIAM1	0.248818	90	0.0180388	0.470465	0.40126	0.0156906	0.246808	0.0219709	0.517541	0.250376	0.0250915	0.585191
GATM	0.250093	89	0.0180929	0.470465	0.40126	0.00719341	0.25444	0.0195112	0.49713	0.244106	0.0301598	0.600909
JUP	0.271927	75	0.0182718	0.471482	0.402127	0.0107966	0.287912	0.0156539	0.484251	0.32227	0.0061283	0.46893
WASF1	0.30626	59	0.0183198	0.471737	0.402344	0.0192957	0.301172	0.0240965	0.529255	0.273768	0.0451606	0.653571
ABCD3	0.24821	90	0.0183315	0.471737	0.402344	0.00745694	0.232348	0.0323706	0.556592	0.183383	0.101271	0.750019
NBR1	0.221507	113	0.0183816	0.472384	0.402896	0.00465423	0.227814	0.0194249	0.496113	0.221268	0.0261705	0.591925
OR10A2	0.25188	87	0.0185987	0.47525	0.40534	0.0153492	0.255209	0.0198855	0.501154	0.301806	0.00686967	0.46893
KRTAP10-9	0.267668	77	0.0185989	0.47525	0.40534	0.00861064	0.263997	0.0283865	0.542811	0.225915	0.0619688	0.692563
DYNLRB2	0.426932	30	0.0186262	0.47525	0.40534	0.0401012	0.418952	0.0264848	0.533997	0.457457	0.0143814	0.521203
MYH2	0.223806	110	0.0187545	0.47525	0.40534	0.00563339	0.228043	0.0218144	0.515574	0.250903	0.0122465	0.499766
OR1E2	0.241957	94	0.0187986	0.47525	0.40534	0.00853308	0.219341	0.038901	0.577596	0.224498	0.0400718	0.641149
TAAR5	0.23929	96	0.0188714	0.47525	0.40534	0.0130694	0.238472	0.0228233	0.522644	0.215258	0.0452534	0.653571
SLC28A3	0.219529	114	0.0189352	0.47525	0.40534	0.00658943	0.227384	0.0202687	0.504213	0.214814	0.0301466	0.600909
EPB41L2	0.223467	110	0.0189393	0.47525	0.40534	0.00942313	0.233947	0.0191464	0.49568	0.226037	0.0252213	0.585191
TM9SF3	0.400417	34	0.0189448	0.47525	0.40534	0.0209697	0.410138	0.0159917	0.484251	0.432162	0.0170822	0.537954
ITIH6	0.25093	87	0.0190626	0.476315	0.406248	0.00829937	0.2362	0.0349162	0.569827	0.220407	0.0509531	0.674012
ANO4	0.264537	78	0.0192598	0.480607	0.409909	0.0140037	0.262349	0.0259943	0.529999	0.221711	0.0650963	0.695461
LPCAT4	0.230152	103	0.0193474	0.481525	0.410692	0.00911152	0.235723	0.0207758	0.506432	0.230614	0.0269925	0.591925
SLC35F4	0.244383	91	0.0195667	0.483614	0.412474	0.0178893	0.253175	0.0186751	0.491077	0.284385	0.00961487	0.484027
ZBTB12	0.305771	58	0.0195854	0.483614	0.412474	0.0272804	0.24448	0.0693818	0.645343	0.236176	0.0986914	0.74871
CLDN11	0.311016	56	0.0196415	0.483614	0.412474	0.0189233	0.296271	0.0296084	0.542811	0.250101	0.073744	0.713737
LACTB2	0.235174	98	0.019752	0.483614	0.412474	0.00620072	0.253384	0.0148073	0.479322	0.2047	0.0557337	0.686643
ALG3	0.237448	96	0.0198352	0.484548	0.413271	0.0201159	0.232362	0.0284377	0.542811	0.0858281	0.432019	0.913849
HMGN2	0.453758	26	0.0198943	0.48494	0.413605	0.0172708	0.438914	0.024885	0.529794	0.411851	0.0455326	0.653715
TP53I3	0.235784	97	0.0200729	0.486942	0.415312	0.00979933	0.226649	0.0289125	0.542811	0.278524	0.00899521	0.484027
SNRNP25	0.353252	43	0.0201448	0.486942	0.415312	0.0199927	0.362681	0.0197826	0.501154	0.299564	0.0539386	0.683824
CTBS	0.224377	107	0.0201564	0.486942	0.415312	0.0108624	0.218343	0.0299192	0.54357	0.319244	0.00135494	0.400724
CCT8	0.265833	76	0.0202869	0.487363	0.415671	0.00928362	0.269943	0.0209081	0.508103	0.254094	0.0351338	0.624205
CAMKV	0.240278	93	0.0203454	0.487363	0.415671	0.0231224	0.227137	0.0323084	0.556027	0.254678	0.0186641	0.555365
MAGI2	0.236456	96	0.0203717	0.487363	0.415671	0.00828214	0.254439	0.0161203	0.484251	0.215336	0.0439198	0.647159
CBR1	0.231678	100	0.0203789	0.487363	0.415671	0.00571216	0.22841	0.0268122	0.535049	0.23541	0.0272514	0.591925
GRXCR2	0.242751	91	0.0204233	0.487363	0.415671	0.0116692	0.220659	0.0388371	0.577596	0.206031	0.0616696	0.692563
LEPROT	0.348437	44	0.0204551	0.487363	0.415671	0.0262193	0.344279	0.0255759	0.529794	0.333914	0.035226	0.624205
STXBP2	0.234823	97	0.0206	0.488649	0.416768	0.0146608	0.214302	0.0413692	0.582112	0.167998	0.117683	0.764079
GRIN3B	0.238353	94	0.0206978	0.48902	0.417085	0.0165996	0.282088	0.00933159	0.434046	0.184464	0.0853446	0.733516
PRHOXNB	0.25993	79	0.0207008	0.48902	0.417085	0.0120638	0.275967	0.0189538	0.492876	0.229669	0.0540151	0.683878
COL16A1	0.219369	111	0.0207072	0.48902	0.417085	0.0109664	0.23746	0.0162547	0.48445	0.253089	0.0114874	0.494166
GYS2	0.232186	99	0.0207456	0.489317	0.417338	0.0064665	0.251782	0.0154721	0.484138	0.18244	0.0888914	0.738904
DERL3	0.259479	79	0.0209302	0.492147	0.419752	0.0129574	0.22939	0.0509151	0.603754	0.187661	0.111866	0.758895
ACTBL2	0.253061	83	0.020986	0.492147	0.419752	0.0129073	0.29371	0.01002	0.437071	0.258611	0.0240913	0.580004
ID3	0.355118	42	0.0210124	0.492147	0.419752	0.0299644	0.361588	0.0201845	0.503442	0.263432	0.110037	0.758895
SORCS3	0.225924	104	0.0211085	0.492172	0.419773	0.00589292	0.239609	0.0187084	0.491218	0.167537	0.104627	0.753807
TGM5	0.220643	109	0.0211377	0.492172	0.419773	0.00889637	0.267558	0.0068314	0.407557	0.237791	0.0172053	0.537954
KRTAP10-12	0.267089	74	0.0214235	0.493627	0.421014	0.0113335	0.26513	0.0276891	0.539282	0.337456	0.00559006	0.464444
BRMS1L	0.457488	25	0.0214817	0.493766	0.421133	0.0327327	0.459128	0.0209597	0.508305	0.477471	0.0182993	0.551544
TRIM9	0.280474	67	0.021509	0.493795	0.421157	0.0176986	0.299126	0.016346	0.48445	0.209444	0.099466	0.749265
MTMR9	0.258279	79	0.021551	0.49416	0.421469	0.00984625	0.250643	0.0312467	0.550486	0.214776	0.0680413	0.7007
RUSC2	0.221752	107	0.0217026	0.494364	0.421642	0.0113564	0.302368	0.00247768	0.326093	0.165718	0.106614	0.753807
ACVR2A	0.376282	37	0.0217123	0.494364	0.421642	0.0235449	0.39908	0.0175555	0.490182	0.342033	0.0477087	0.659239
SSTR4	0.279927	67	0.0217759	0.495121	0.422288	0.0204856	0.316099	0.0116097	0.45316	0.128588	0.336061	0.88055
FBXO10	0.224645	104	0.0218692	0.496054	0.423084	0.0154542	0.234668	0.0213701	0.511608	0.187613	0.0701789	0.704319
TMUB1	0.242661	89	0.0219486	0.496548	0.423506	0.0278136	0.245651	0.0243019	0.529689	0.217271	0.0544289	0.68506
SYT2	0.285934	64	0.021996	0.496548	0.423506	0.01168	0.298152	0.0206793	0.506122	0.207588	0.111488	0.758895
BEND5	0.31667	52	0.0221819	0.499555	0.42607	0.032957	0.312008	0.0290741	0.542811	0.330894	0.0202166	0.557005
TAAR3	0.242895	88	0.0225936	0.501191	0.427466	0.0176087	0.239468	0.0292278	0.542811	0.335765	0.00218101	0.410762
DTX3	0.39581	33	0.022602	0.501191	0.427466	0.0234902	0.415832	0.019987	0.501157	0.433455	0.0148525	0.52285
ANXA8	0.251389	82	0.0227151	0.501191	0.427466	0.011665	0.247984	0.0307797	0.550486	0.33972	0.0028649	0.415116
PGA5	0.27366	69	0.0228891	0.501191	0.427466	0.0110683	0.253006	0.0404	0.578723	0.297232	0.017996	0.549401
SLU7	0.247889	84	0.0229954	0.501191	0.427466	0.0094101	0.238943	0.0339434	0.563174	0.218784	0.0575937	0.687782
REXO2	0.283876	64	0.0230123	0.501191	0.427466	0.0199781	0.272749	0.0319713	0.554541	0.270236	0.0384528	0.631493
TMEM215	0.240464	89	0.0232149	0.501191	0.427466	0.0102164	0.228011	0.0369778	0.570443	0.329798	0.00264148	0.41393
MEIS2	0.358247	40	0.0232178	0.501191	0.427466	0.074286	0.344756	0.0316084	0.550486	0.32193	0.0555265	0.686643
STMN4	0.393886	33	0.0233277	0.501191	0.427466	0.0977717	0.383799	0.0301178	0.544655	0.430382	0.0139409	0.521066
TSPAN2	0.256367	78	0.0234744	0.501191	0.427466	0.0140805	0.250958	0.0298752	0.54357	0.235417	0.049781	0.667062
TMBIM1	0.242738	87	0.023491	0.501191	0.427466	0.00508944	0.224647	0.0424533	0.585349	0.286208	0.0110761	0.488854
LRRC8D	0.233472	94	0.0235307	0.501191	0.427466	0.00867202	0.233125	0.0279065	0.540133	0.244799	0.0248155	0.582763
WDR82	0.620441	13	0.0236651	0.501191	0.427466	0.0119076	0.632903	0.020247	0.504213	0.629913	0.0281426	0.596627
ZSWIM4	0.23966	89	0.0236934	0.501191	0.427466	0.0124579	0.274647	0.0125222	0.460307	0.180624	0.113531	0.758895
WNT4	0.366283	38	0.0237137	0.501191	0.427466	0.0428665	0.394136	0.0157887	0.484251	0.240134	0.164685	0.803156
OR4D5	0.235556	92	0.023797	0.501191	0.427466	0.0132169	0.279971	0.00903351	0.431124	0.171322	0.123811	0.770124
OR8J1	0.228085	98	0.0238945	0.501191	0.427466	0.0150311	0.230562	0.0278967	0.540133	0.24637	0.0192423	0.555365
LPGAT1	0.240654	88	0.0239106	0.501191	0.427466	0.0136152	0.228021	0.0381477	0.57504	0.230296	0.0373911	0.630097
PGM1	0.23796	90	0.0239162	0.501191	0.427466	0.0170422	0.261592	0.016902	0.486605	0.201188	0.0699177	0.702991
MLST8	0.360971	39	0.0239681	0.501191	0.427466	0.0362906	0.372173	0.0213951	0.511608	0.301849	0.0827478	0.730238
PLN	0.433229	27	0.0239856	0.501191	0.427466	0.0477477	0.452856	0.0176918	0.490266	0.365205	0.0665712	0.698215
TMPRSS11F	0.223407	102	0.0240017	0.501191	0.427466	0.00913917	0.228449	0.0251753	0.529794	0.240483	0.0209385	0.558038
KRT121P	0.229068	97	0.0240135	0.501191	0.427466	0.00580857	0.223034	0.0335831	0.561414	0.252108	0.0191961	0.555365
SLC25A17	0.262176	74	0.0240361	0.501191	0.427466	0.0145531	0.255003	0.0358472	0.570443	0.213762	0.0824	0.730119
GDI1	0.298517	57	0.0241006	0.501191	0.427466	0.0234699	0.302935	0.0274605	0.53774	0.31455	0.0245733	0.580761
OR5M11	0.252011	80	0.0241262	0.501191	0.427466	0.014873	0.236827	0.0451813	0.589881	0.276618	0.0170418	0.537954
MYOM2	0.223091	102	0.024207	0.501191	0.427466	0.0106004	0.204919	0.0500558	0.601767	0.244163	0.019	0.555365
KRTAP10-4	0.347292	42	0.0242314	0.501191	0.427466	0.00583862	0.400417	0.00948191	0.436424	0.364573	0.0288081	0.599367
KLHL23	0.260002	75	0.0242746	0.501191	0.427466	0.0226827	0.250352	0.033919	0.563174	0.227505	0.0640936	0.695461
FAM5B	0.233352	93	0.024379	0.501191	0.427466	0.00857997	0.250289	0.0186771	0.491077	0.233699	0.0334741	0.619574
OR52H1	0.242632	86	0.0243917	0.501191	0.427466	0.0160323	0.246043	0.0258681	0.529827	0.295282	0.00913086	0.484027
ZBTB16	0.235724	91	0.0244883	0.501191	0.427466	0.0154804	0.240522	0.0266003	0.533997	0.171986	0.120015	0.765481
EIF4EBP1	0.280898	64	0.0245525	0.501191	0.427466	0.0290843	0.281063	0.0269065	0.535049	0.304993	0.0210608	0.558038
DUSP4	0.274491	67	0.0245833	0.501191	0.427466	0.0166511	0.278667	0.0257628	0.529827	0.208935	0.106101	0.753807
KRT15	0.221821	102	0.025048	0.50524	0.430919	0.00629618	0.234115	0.02314	0.526334	0.282191	0.00642445	0.46893
OR9I1	0.214548	109	0.0250731	0.50524	0.430919	0.00639481	0.226858	0.0225281	0.520571	0.184092	0.0681436	0.700938
OR4D6	0.223886	100	0.0251416	0.50524	0.430919	0.0175951	0.222392	0.0312107	0.550486	0.280528	0.00675773	0.46893
MAT2B	0.269406	69	0.025186	0.50524	0.430919	0.0181866	0.252725	0.0422451	0.584034	0.227872	0.0748693	0.715102
SEC23B	0.242719	85	0.0252077	0.50524	0.430919	0.00821029	0.242041	0.0294813	0.542811	0.214942	0.0587816	0.690984
KIF2A	0.301565	55	0.0252559	0.50524	0.430919	0.0332136	0.293222	0.0314086	0.550486	0.362581	0.00892818	0.484027
KRT72	0.220392	103	0.025285	0.50524	0.430919	0.00834573	0.203165	0.0483092	0.59774	0.211297	0.0420392	0.645622
CAMK2N2	0.593283	14	0.025323	0.50524	0.430919	0.0723402	0.595513	0.0246403	0.529794	0.570809	0.0416133	0.644037
FGF22	0.248261	81	0.0254353	0.50524	0.430919	0.0121254	0.230337	0.0499399	0.601767	0.228706	0.0533147	0.682774
NCOA2	0.231688	93	0.025444	0.50524	0.430919	0.010562	0.243678	0.0221478	0.518269	0.224747	0.0398448	0.639273
DFNB59	0.270801	68	0.0255096	0.50524	0.430919	0.0225511	0.295804	0.0176362	0.490266	0.314343	0.0144443	0.521203
KPNA3	0.445792	25	0.025519	0.50524	0.430919	0.0355827	0.455039	0.0222809	0.518689	0.446724	0.0286391	0.599176
SMCR7	0.215839	107	0.0255608	0.50524	0.430919	0.00914007	0.239357	0.0159211	0.484251	0.179645	0.0782866	0.720374
MYBPHL	0.23027	94	0.0255638	0.50524	0.430919	0.020125	0.231276	0.032152	0.55485	0.26749	0.0122549	0.499766
SLC34A1	0.213698	109	0.0256688	0.505897	0.431479	0.00810505	0.194112	0.0494478	0.600447	0.126703	0.2162	0.832907
KRTAP10-1	0.247765	81	0.0257394	0.506762	0.432217	0.00800648	0.254799	0.0295947	0.542811	0.287113	0.0131289	0.507646
CYP4F3	0.222721	100	0.0259298	0.508923	0.43406	0.0161002	0.21346	0.0399339	0.577995	0.200266	0.0584175	0.690984
HIST1H2BN	0.484615	21	0.0259859	0.509358	0.434431	0.112114	0.490142	0.0240933	0.529255	0.508599	0.0220246	0.56488
TKTL2	0.223604	99	0.0260929	0.509731	0.434749	0.00844146	0.252076	0.0171686	0.488015	0.181348	0.0853728	0.733516
KRT77	0.215882	106	0.026245	0.510361	0.435287	0.00744111	0.217638	0.0304657	0.547811	0.216718	0.035901	0.624205
SLC22A6	0.218754	103	0.0264204	0.512643	0.437232	0.00644183	0.214663	0.0367079	0.570443	0.20136	0.0516406	0.674221
TMEM145	0.240764	85	0.0264441	0.512643	0.437232	0.0161571	0.300562	0.00674991	0.407557	0.214961	0.0604588	0.692403
GNMT	0.250553	78	0.0269312	0.519427	0.443019	0.0118752	0.261322	0.0255384	0.529794	0.225153	0.0609318	0.692403
DYRK1B	0.2606	72	0.0270413	0.519813	0.443348	0.0176692	0.289737	0.0165487	0.484958	0.193595	0.119352	0.76456
SLC10A2	0.215756	105	0.0270721	0.519813	0.443348	0.00661036	0.222406	0.028557	0.542811	0.266719	0.00898158	0.484027
PUS7	0.218883	102	0.0270888	0.519813	0.443348	0.0144772	0.200839	0.0549026	0.615735	0.123141	0.242228	0.843898
OBP2A	0.368194	36	0.0271419	0.519813	0.443348	0.0121971	0.421188	0.0163643	0.48445	0.324893	0.0696275	0.702991
GALNT16	0.223143	98	0.0272035	0.519813	0.443348	0.00779065	0.229202	0.0279692	0.54029	0.169937	0.111358	0.758895
SOCS7	0.263944	70	0.0272536	0.519813	0.443348	0.0090972	0.359771	0.00324486	0.351475	0.261042	0.0357005	0.624205
KCNS2	0.271731	66	0.027308	0.519813	0.443348	0.0232831	0.284509	0.0238261	0.528506	0.225136	0.0785247	0.721512
ATG9B	0.212206	108	0.0274663	0.520356	0.443811	0.011809	0.235758	0.0194397	0.496113	0.260841	0.00948277	0.484027
PGA3	0.236423	87	0.0274771	0.520356	0.443811	0.0109789	0.23359	0.0314315	0.550486	0.266554	0.0207974	0.558038
LRRC15	0.213181	107	0.0274775	0.520356	0.443811	0.00645049	0.264789	0.00841728	0.418381	0.174896	0.0849839	0.733136
TGM3	0.21206	108	0.0275754	0.520356	0.443811	0.00622181	0.179021	0.0718109	0.646512	0.214072	0.0362302	0.624857
OR51B6	0.222614	98	0.0275792	0.520356	0.443811	0.0102133	0.213234	0.040149	0.577995	0.251033	0.0190119	0.555365
SERPINB2	0.212044	108	0.0275874	0.520356	0.443811	0.00754434	0.194237	0.0528139	0.61151	0.198767	0.0497543	0.667062
SPRYD7	0.348154	40	0.0277018	0.520507	0.44394	0.0262249	0.393365	0.0160129	0.484251	0.323161	0.0478148	0.65965
TCRBV6S2A1N1T	0.258725	72	0.0282038	0.522857	0.445944	0.00873252	0.285534	0.0191705	0.49568	0.312861	0.00938645	0.484027
KRT33A	0.21952	100	0.0282038	0.522857	0.445944	0.00913369	0.212981	0.037214	0.570443	0.247828	0.0192009	0.555365
ALCAM	0.227548	93	0.0282657	0.522982	0.446051	0.00966996	0.228957	0.0309122	0.550486	0.237162	0.0288575	0.599461
COL8A1	0.225119	95	0.0282799	0.522982	0.446051	0.0124265	0.260602	0.0136427	0.475635	0.268798	0.010864	0.488126
ABTB2	0.222697	97	0.0283441	0.522982	0.446051	0.0102646	0.237609	0.0241304	0.529255	0.23264	0.0282434	0.596627
HRH3	0.245032	80	0.0284769	0.522982	0.446051	0.0170716	0.23604	0.0443862	0.589881	0.314989	0.0070395	0.46893
TRIM3	0.265668	68	0.0285495	0.522982	0.446051	0.0108171	0.282087	0.0250997	0.529794	0.240821	0.0615427	0.692563
OR10A5	0.230528	90	0.0288199	0.523346	0.446361	0.0107661	0.223298	0.0399523	0.577995	0.265939	0.0150985	0.526915
SPG20	0.216299	102	0.0289982	0.524732	0.447543	0.0107483	0.213668	0.0365914	0.570443	0.153073	0.145186	0.791988
TECTA	0.212099	106	0.0290583	0.525156	0.447905	0.0108054	0.207597	0.0392223	0.577995	0.192689	0.0599866	0.692403
EYA1	0.248686	77	0.0291907	0.526214	0.448808	0.0200348	0.27062	0.0205769	0.506122	0.228346	0.0591399	0.690984
EML6	0.237849	84	0.0293594	0.526952	0.449437	0.00904652	0.229097	0.0422654	0.584034	0.206317	0.071824	0.706425
C3orf79	0.340089	41	0.0295853	0.528672	0.450904	0.00923965	0.372382	0.0275986	0.538627	0.322384	0.0589239	0.690984
RAB33A	0.339887	41	0.0296885	0.528672	0.450904	0.0277678	0.349923	0.026868	0.535049	0.37977	0.0186866	0.555365
VPS51	0.230611	89	0.0296888	0.528672	0.450904	0.00982209	0.237184	0.0308512	0.550486	0.227689	0.0384368	0.631493
GSTA5	0.250938	75	0.0298887	0.529058	0.451233	0.00709379	0.258214	0.0285275	0.542811	0.218812	0.073019	0.710593
SLC35E3	0.239882	82	0.0299559	0.52938	0.451508	0.0145784	0.266277	0.0184509	0.490266	0.24601	0.0386379	0.632483
PKP1	0.221594	96	0.0300232	0.52938	0.451508	0.00782501	0.251763	0.0166776	0.485802	0.206812	0.0560639	0.686643
TGM7	0.204172	113	0.0300714	0.52938	0.451508	0.010776	0.248458	0.010985	0.446253	0.25518	0.0100126	0.484027
TMEM132E	0.211656	105	0.0301979	0.529686	0.451769	0.0120564	0.239162	0.0183103	0.490266	0.127208	0.214361	0.831271
CTRC	0.211625	105	0.0302227	0.529686	0.451769	0.0115826	0.190618	0.0614534	0.633309	0.204097	0.0472681	0.659239
XXYLT1	0.250424	75	0.0302376	0.529686	0.451769	0.00878556	0.244352	0.0400098	0.577995	0.162983	0.191027	0.819333
SFN	0.262981	68	0.0302587	0.529686	0.451769	0.011872	0.275283	0.0264589	0.533997	0.266048	0.0366122	0.627421
OR1F1	0.23233	87	0.0303561	0.530324	0.452313	0.00789406	0.218709	0.049809	0.601767	0.218143	0.0519075	0.675726
KIAA1324L	0.212065	104	0.0306839	0.531348	0.453187	0.0091976	0.223881	0.0283251	0.542811	0.217123	0.0355474	0.624205
AAMP	0.279047	60	0.0308421	0.531348	0.453187	0.0203019	0.278506	0.0342641	0.564097	0.265006	0.0551475	0.68628
PCDH17	0.240078	81	0.0308658	0.531348	0.453187	0.0178539	0.246853	0.0315759	0.550486	0.200031	0.089741	0.738904
FABP2	0.239995	81	0.0309259	0.531348	0.453187	0.0325936	0.232279	0.0407181	0.578723	0.235205	0.045166	0.653571
KRT4	0.209741	106	0.0309372	0.531348	0.453187	0.0125125	0.217417	0.0315162	0.550486	0.279673	0.00605427	0.46893
IVD	0.220347	96	0.0309851	0.531348	0.453187	0.00745742	0.208898	0.0444816	0.589881	0.200875	0.0636632	0.694934
ABHD5	0.230019	88	0.0310906	0.531348	0.453187	0.00920177	0.232642	0.0332075	0.559255	0.272496	0.0138506	0.520169
BCL6	0.217832	98	0.0311853	0.531348	0.453187	0.0128634	0.231316	0.0265176	0.533997	0.240169	0.0233894	0.571673
EPB42	0.199989	116	0.0313647	0.531348	0.453187	0.0137646	0.192598	0.047933	0.596073	0.210388	0.0320596	0.614956
OR7C2	0.229513	88	0.0314728	0.531348	0.453187	0.0153244	0.19413	0.0824621	0.664003	0.209457	0.0675118	0.700188
PAX6	0.430804	25	0.0315645	0.531707	0.453492	0.0312082	0.45414	0.0257967	0.529827	0.425568	0.0483121	0.660619
SSR1	0.264796	66	0.0316644	0.532142	0.453864	0.0197467	0.288638	0.0253134	0.529794	0.266317	0.0414671	0.644037
PTCHD4	0.227806	89	0.0317892	0.532751	0.454383	0.00969783	0.230049	0.03642	0.570443	0.214231	0.0532775	0.68276
TUBGCP4	0.254966	71	0.0318847	0.532751	0.454383	0.025338	0.272114	0.025904	0.529827	0.331126	0.00752549	0.469175
OR4C3	0.224918	91	0.0320754	0.532751	0.454383	0.014364	0.228927	0.0339924	0.563391	0.222602	0.0457804	0.655469
GMPPA	0.231322	86	0.0321166	0.532751	0.454383	0.0147165	0.253711	0.0206476	0.506122	0.219581	0.0550116	0.685978
RAB8B	0.38551	31	0.03221	0.532751	0.454383	0.0384256	0.410104	0.0243959	0.529689	0.356948	0.0622322	0.692563
DNM1L	0.276818	60	0.0322619	0.532751	0.454383	0.0246479	0.276133	0.0358902	0.570443	0.229956	0.09437	0.745176
PIKFYVE	0.206197	108	0.0322743	0.532751	0.454383	0.0126773	0.216786	0.0294419	0.542811	0.155833	0.123498	0.769801
OR5H15	0.249031	74	0.0323868	0.532963	0.454564	0.0153548	0.231976	0.0629688	0.635973	0.254547	0.0376431	0.631486
HMBOX1	0.334661	41	0.0324598	0.532963	0.454564	0.0305405	0.315992	0.0500308	0.601767	0.427552	0.007418	0.469175
C11orf96	0.362165	35	0.0325201	0.533274	0.454829	0.0719743	0.346024	0.0417362	0.583711	0.395088	0.0228719	0.570692
GTSF1	0.296906	52	0.0325631	0.533517	0.455036	0.0178863	0.313911	0.0336297	0.561414	0.252351	0.0770619	0.717422
PSMG2	0.221698	93	0.0327022	0.533667	0.455164	0.0128886	0.217388	0.0407188	0.578723	0.231691	0.0350688	0.624205
GABRA1	0.285603	56	0.0328664	0.533743	0.455229	0.03109	0.320515	0.0205276	0.506122	0.14746	0.296848	0.871965
CA5B	0.2114	102	0.0329333	0.533743	0.455229	0.0109901	0.237793	0.019008	0.493609	0.213761	0.0396474	0.638994
PDHX	0.208352	105	0.0329344	0.533743	0.455229	0.00976099	0.23602	0.0193016	0.496113	0.215371	0.0360778	0.624205
FZD8	0.333592	41	0.0330518	0.533743	0.455229	0.0199501	0.40416	0.0131055	0.468031	0.312838	0.0558313	0.686643
SLC18A3	0.21003	103	0.0332235	0.533743	0.455229	0.0100123	0.211942	0.039218	0.577995	0.185644	0.0732268	0.71225
OR52I2	0.217185	96	0.0335419	0.534468	0.455847	0.00993495	0.214242	0.0437944	0.589881	0.213991	0.0465665	0.659239
CELA3B	0.217169	96	0.0335555	0.534468	0.455847	0.00707661	0.208397	0.0474436	0.593854	0.248656	0.0209665	0.558038
CD81	0.261608	66	0.0338538	0.535838	0.457016	0.0100271	0.26188	0.0381426	0.57504	0.268527	0.0363961	0.626278
C1QBP	0.226109	88	0.0341517	0.537684	0.45859	0.0123315	0.2223	0.0396693	0.577995	0.185035	0.102565	0.751699
RALGAPA2	0.202005	110	0.0343183	0.53807	0.458919	0.012011	0.205354	0.0404012	0.578723	0.171369	0.0898824	0.738904
OR2L3	0.363898	34	0.0343749	0.538213	0.459041	0.0102947	0.344905	0.053206	0.612306	0.377988	0.036033	0.624205
CPB1	0.202757	109	0.0344764	0.538358	0.459165	0.0100356	0.182478	0.0691971	0.645343	0.170843	0.0943034	0.745176
MYOZ1	0.219425	93	0.0345778	0.539398	0.460052	0.0165452	0.218772	0.0394242	0.577995	0.238705	0.0278015	0.593405
SYNGR3	0.285342	55	0.0347149	0.539398	0.460052	0.0191942	0.249055	0.0721192	0.646881	0.260603	0.0675708	0.700188
CHMP1A	0.302272	49	0.0347777	0.539398	0.460052	0.0262758	0.304868	0.0371897	0.570443	0.341584	0.0232488	0.571673
SEC14L6	0.222784	90	0.0348086	0.539398	0.460052	0.00538029	0.236902	0.0280808	0.54079	0.241256	0.0310955	0.603667
ALDH3A2	0.207024	104	0.0349773	0.53991	0.460489	0.00783369	0.201748	0.0499291	0.601767	0.230828	0.0260094	0.591925
PHLDA1	0.238962	78	0.0351167	0.539967	0.460538	0.0144728	0.230958	0.0509471	0.603754	0.246542	0.0426882	0.647159
SLC25A18	0.232893	82	0.0352389	0.539967	0.460538	0.00956384	0.242807	0.0310764	0.550486	0.226095	0.0544297	0.68506
OLIG3	0.284409	55	0.0353382	0.539967	0.460538	0.0149749	0.290684	0.0365664	0.570443	0.199602	0.160236	0.801396
OR2F1	0.209614	101	0.0353958	0.539967	0.460538	0.010856	0.204128	0.0509662	0.603754	0.226592	0.0298549	0.600909
SLC35F5	0.218459	93	0.0354021	0.539967	0.460538	0.00999265	0.20164	0.0642334	0.642442	0.231828	0.0338461	0.619574
TMEM39B	0.261392	65	0.0354452	0.539967	0.460538	0.0213895	0.274166	0.029675	0.542811	0.264763	0.0409197	0.642474
TADA2B	0.2952	51	0.0354657	0.539967	0.460538	0.020325	0.302076	0.036915	0.570443	0.271409	0.0620405	0.692563
KRTAP2-3	0.241498	76	0.0355839	0.540563	0.461045	0.0111913	0.256963	0.0305228	0.548224	0.279031	0.0176171	0.544485
XDH	0.198601	112	0.0358019	0.542435	0.462642	0.00609626	0.207561	0.0363242	0.570443	0.273038	0.00598711	0.46893
MMP8	0.196821	114	0.0358268	0.542435	0.462642	0.00951969	0.199205	0.0406394	0.578723	0.224782	0.0231256	0.570692
GADD45A	0.310079	46	0.0359779	0.542707	0.462874	0.0209849	0.302909	0.0431156	0.589821	0.296915	0.0562016	0.686643
AGPAT9	0.220181	91	0.0359785	0.542707	0.462874	0.0128471	0.197121	0.0688862	0.645343	0.194802	0.0776033	0.717925
OR52W1	0.212091	98	0.0360321	0.542918	0.463054	0.0207503	0.189644	0.0717891	0.646512	0.233624	0.0284761	0.598884
KRT1	0.204715	105	0.0361858	0.543936	0.463923	0.00799855	0.20877	0.0381011	0.57504	0.251461	0.0150404	0.526219
GPR108	0.21636	94	0.036216	0.543958	0.463941	0.0136332	0.214022	0.0452569	0.590054	0.168786	0.124832	0.772679
CS	0.231569	82	0.0363225	0.544522	0.464422	0.0157248	0.241398	0.0320975	0.554794	0.219083	0.0625707	0.692595
PHF12	0.217371	93	0.0363496	0.544522	0.464422	0.015551	0.233621	0.0294218	0.542811	0.217141	0.0486274	0.662497
FAM177A1	0.222194	89	0.0363686	0.544522	0.464422	0.0115446	0.204797	0.0600859	0.630229	0.20823	0.0621195	0.692563
PDP1	0.247072	72	0.0364081	0.544603	0.464492	0.0131799	0.247123	0.0406462	0.578723	0.25649	0.0376324	0.631486
UNC119B	0.268476	61	0.0364331	0.544603	0.464492	0.0203839	0.187732	0.158191	0.74902	0.172468	0.212365	0.830208
ATP6V0C	0.290793	52	0.0364926	0.544656	0.464537	0.0381189	0.300801	0.0357145	0.570443	0.251888	0.0808156	0.72799
QDPR	0.239926	76	0.0368378	0.547652	0.467092	0.0107807	0.238489	0.0436495	0.589881	0.170879	0.160366	0.801396
MYO7A	0.216731	93	0.0369169	0.547867	0.467275	0.0104051	0.241087	0.0244825	0.529689	0.173976	0.111294	0.758895
AQP9	0.209885	99	0.0370613	0.547867	0.467275	0.00994462	0.193063	0.065203	0.645343	0.195872	0.0658286	0.696012
HOXD11	0.364352	33	0.0371057	0.547867	0.467275	0.0212464	0.357628	0.044476	0.589881	0.301964	0.118358	0.764424
PRSS3	0.246177	72	0.0371126	0.547867	0.467275	0.0152676	0.210698	0.0894817	0.67516	0.229237	0.0640996	0.695461
SPON1	0.212925	96	0.0372645	0.548683	0.467971	0.0095386	0.238776	0.0234236	0.526334	0.201854	0.060808	0.692403
HSPB7	0.267332	61	0.0372684	0.548683	0.467971	0.0252347	0.259517	0.0452444	0.590054	0.268734	0.047271	0.659239
RPS29	0.468285	20	0.0373038	0.548683	0.467971	0.0533082	0.485134	0.0301465	0.544655	0.20856	0.391524	0.900749
TRAPPC6B	0.410212	26	0.0373956	0.549474	0.468646	0.0198887	0.413694	0.0444797	0.589881	0.323153	0.123494	0.769801
KIAA1244	0.197636	111	0.0375978	0.550736	0.469722	0.0108768	0.203011	0.040717	0.578723	0.148417	0.142619	0.789365
LPL	0.212472	96	0.0376803	0.551519	0.47039	0.0144044	0.209385	0.046378	0.590582	0.165208	0.126216	0.77452
KRTAP17-1	0.273079	58	0.0380758	0.554538	0.472965	0.0137359	0.293615	0.0311716	0.550486	0.313992	0.0263786	0.591925
NPC1	0.19698	111	0.0382498	0.555758	0.474005	0.00999856	0.193052	0.0518919	0.60753	0.229389	0.0216898	0.563695
OR8U8	0.220045	89	0.0382634	0.555758	0.474005	0.0232212	0.226411	0.040815	0.579647	0.255371	0.0205849	0.558038
ACY3	0.244659	72	0.0383347	0.556367	0.474525	0.0156183	0.217699	0.0790998	0.656365	0.220106	0.0734922	0.71352
CADM4	0.293716	50	0.038428	0.556442	0.474589	0.0125223	0.294269	0.0423353	0.584572	0.246737	0.0983169	0.74795
OR10A6	0.212636	95	0.0385641	0.55756	0.475543	0.0118864	0.200262	0.0613775	0.633309	0.181564	0.0943168	0.745176
TMEM63A	0.203142	104	0.0386184	0.557884	0.475819	0.00806547	0.202998	0.0449934	0.589881	0.238562	0.0212873	0.558516
TAOK1	0.29631	49	0.0387056	0.558278	0.476155	0.0160599	0.297313	0.0401491	0.577995	0.252948	0.0936468	0.745176
PURG	0.245769	71	0.0388352	0.558795	0.476596	0.0165556	0.355628	0.00314337	0.351475	0.267969	0.0309159	0.603667
RGL2	0.20582	101	0.0389338	0.558795	0.476596	0.00996828	0.220983	0.0313939	0.550486	0.259871	0.0128595	0.504139
C17orf99	0.216862	91	0.0389444	0.558795	0.476596	0.0180418	0.224936	0.0373233	0.570793	0.24012	0.0319215	0.614956
ARHGEF33	0.204647	102	0.0390892	0.559599	0.477282	0.0114771	0.229409	0.0261353	0.530866	0.112023	0.285037	0.866837
FERMT3	0.216417	91	0.039357	0.561068	0.478534	0.0152111	0.230589	0.0348371	0.569827	0.234662	0.0338328	0.619574
MAL	0.226521	83	0.03947	0.561654	0.479035	0.0118031	0.210896	0.0656062	0.645343	0.270225	0.0198864	0.556891
TRO	0.227678	82	0.0396708	0.56282	0.480029	0.00952775	0.228197	0.0505255	0.602708	0.237731	0.0413935	0.643792
PNLIP	0.199176	107	0.0397104	0.56296	0.480148	0.00974583	0.186118	0.066521	0.645343	0.186733	0.068502	0.701626
LRFN3	0.21581	91	0.0399261	0.564392	0.481369	0.0147259	0.228708	0.0363887	0.570443	0.184684	0.0967078	0.747565
POU4F3	0.364736	32	0.0401228	0.564751	0.481676	0.0275468	0.383451	0.040038	0.577995	0.483988	0.00672974	0.46893
KRTAP8-1	0.242291	72	0.0403074	0.564777	0.481698	0.0143719	0.248072	0.0446059	0.589881	0.244799	0.0493738	0.666243
RAB3B	0.270046	58	0.040355	0.564911	0.481812	0.0156661	0.261501	0.0494271	0.600447	0.346304	0.0119073	0.49863
WDFY3	0.203244	102	0.0404814	0.565422	0.482248	0.0071043	0.201246	0.0492832	0.60003	0.123108	0.242354	0.844124
KRTAP10-8	0.217599	89	0.0405184	0.565422	0.482248	0.00879615	0.231814	0.0361195	0.570443	0.184957	0.100491	0.749452
BZW2	0.321176	41	0.0406056	0.565478	0.482295	0.0255588	0.336167	0.0339347	0.563174	0.360712	0.026095	0.591925
GRM1	0.201974	103	0.040763	0.565996	0.482737	0.0106959	0.185309	0.0721992	0.646881	0.199613	0.0537449	0.683133
TRPV6	0.196296	109	0.0407852	0.565996	0.482737	0.0074676	0.205374	0.0393691	0.577995	0.219638	0.029779	0.600274
CDH11	0.241426	72	0.0410477	0.567303	0.483852	0.0143537	0.262031	0.0308832	0.550486	0.353229	0.00389884	0.4419
YTHDF2	0.281455	53	0.0411872	0.567754	0.484237	0.0302354	0.288578	0.0400062	0.577995	0.174277	0.23614	0.842678
TRIM27	0.357348	33	0.0411888	0.567754	0.484237	0.0449962	0.355304	0.0424464	0.585349	0.230684	0.203998	0.825871
PNLIPRP2	0.190662	115	0.0412461	0.567754	0.484237	0.00784759	0.167878	0.0869303	0.672407	0.182162	0.0655299	0.695779
GRAMD1A	0.212064	93	0.0412821	0.567754	0.484237	0.0135295	0.212999	0.0450611	0.589881	0.259482	0.0171472	0.537954
CALN1	0.284018	52	0.0412979	0.567754	0.484237	0.0249513	0.271281	0.0541559	0.615012	0.350221	0.0146758	0.52285
MUC2	0.211971	93	0.041373	0.568241	0.484652	0.00995136	0.205781	0.0588397	0.625276	0.245076	0.0237821	0.576398
DNAJB12	0.213079	92	0.0414177	0.568443	0.484824	0.00634851	0.223206	0.0388496	0.577596	0.202341	0.0649154	0.695461
YTHDC2	0.228233	80	0.0417294	0.57157	0.487491	0.0264345	0.264702	0.021734	0.515574	0.225214	0.0571613	0.687068
SPRR2B	0.278104	54	0.0417323	0.57157	0.487491	0.0216505	0.289237	0.0375534	0.572402	0.206789	0.153979	0.796725
OR10Q1	0.212754	92	0.0417361	0.57157	0.487491	0.0124222	0.217148	0.0433522	0.589881	0.197782	0.0748896	0.715102
RFX7	0.197909	106	0.0419916	0.574239	0.489768	0.0152075	0.203615	0.0421649	0.584034	0.154269	0.13137	0.778512
BMP7	0.252807	65	0.0421758	0.574541	0.490025	0.00917489	0.243034	0.0569948	0.621884	0.219163	0.0869986	0.736814
RAB7A	0.497016	17	0.0423848	0.574541	0.490025	0.0210677	0.526063	0.0363373	0.570443	0.569797	0.0265908	0.591925
GREM1	0.335437	37	0.0423995	0.574541	0.490025	0.0426797	0.316899	0.0596797	0.629063	0.286429	0.0952853	0.74523
ITGB6	0.202324	101	0.0424526	0.574541	0.490025	0.0126915	0.180711	0.0780795	0.656365	0.169799	0.105629	0.753807
ABCG8	0.191169	113	0.0425286	0.574541	0.490025	0.0114902	0.186944	0.0574063	0.62278	0.160968	0.106047	0.753807
CPNE5	0.24843	67	0.0426498	0.574541	0.490025	0.0189532	0.255656	0.0414542	0.582112	0.216381	0.0885078	0.738904
RASL12	0.21537	89	0.0426696	0.574541	0.490025	0.00879435	0.260615	0.0180415	0.490266	0.129979	0.247458	0.846599
PFDN6	0.354916	33	0.0426888	0.574541	0.490025	0.0368763	0.354557	0.0503389	0.602572	0.242233	0.18163	0.814858
SPRR3	0.24295	70	0.0427092	0.574541	0.490025	0.00538803	0.267076	0.0301723	0.544655	0.276568	0.026947	0.591925
LGR5	0.19719	106	0.042758	0.574541	0.490025	0.0156477	0.192256	0.0592154	0.626961	0.192116	0.0607654	0.692403
SPTA1	0.18927	115	0.0427775	0.574541	0.490025	0.00840142	0.172027	0.079301	0.656427	0.171004	0.0841559	0.73031
OR6B2	0.220279	85	0.0427894	0.574541	0.490025	0.00955738	0.243666	0.0315734	0.550486	0.200986	0.0796477	0.724794
OPN1SW	0.204999	98	0.042877	0.574585	0.490063	0.0124055	0.218764	0.0394312	0.577995	0.213906	0.0479725	0.660012
BTBD11	0.213869	90	0.0429643	0.574678	0.490142	0.0132958	0.291664	0.00710484	0.407557	0.151763	0.173489	0.808212
KRTAP10-7	0.278999	53	0.0430655	0.574989	0.490408	0.0103001	0.271189	0.0594564	0.628012	0.233352	0.0993539	0.749265
CSMD3	0.218618	86	0.0431505	0.574989	0.490408	0.012148	0.276073	0.0144212	0.479322	0.18177	0.116067	0.760841
DHRS12	0.226671	80	0.0431873	0.574989	0.490408	0.012312	0.219502	0.0639394	0.640782	0.259419	0.0266701	0.591925
GSTM4	0.213622	90	0.0432104	0.574989	0.490408	0.0156144	0.21009	0.0508074	0.603754	0.27217	0.0128044	0.504139
CORO1A	0.222471	83	0.0432304	0.574989	0.490408	0.0145763	0.225436	0.0430203	0.589821	0.223208	0.0576706	0.688265
CARKD	0.201538	101	0.0432789	0.57523	0.490613	0.00853979	0.212637	0.0418513	0.583852	0.193985	0.0654074	0.695779
UMPS	0.197388	105	0.0435588	0.576561	0.491748	0.00923326	0.214285	0.0341095	0.563437	0.195642	0.0574274	0.687096
PTGS1	0.19269	110	0.0437157	0.577136	0.492239	0.00633172	0.208783	0.0352147	0.569971	0.205852	0.0409403	0.642474
RD3	0.223301	82	0.0437401	0.577136	0.492239	0.0125867	0.245939	0.0322316	0.555717	0.207804	0.0756316	0.715102
LIMK1	0.211823	91	0.0438355	0.577136	0.492239	0.0135892	0.207174	0.0571108	0.622415	0.217111	0.0515441	0.674221
COL17A1	0.187493	116	0.0438621	0.577136	0.492239	0.0100213	0.194095	0.0441353	0.589881	0.22278	0.0223555	0.568524
ANKFN1	0.200893	101	0.0439673	0.577136	0.492239	0.00963016	0.215723	0.0357671	0.570443	0.265918	0.0104062	0.484027
VAT1	0.220372	84	0.0439767	0.577136	0.492239	0.00980608	0.226338	0.0448794	0.589881	0.137314	0.246676	0.846291
OR5L2	0.2093	93	0.0440649	0.577136	0.492239	0.00674191	0.159776	0.137022	0.731263	0.225917	0.038797	0.633254
INSC	0.201803	100	0.0440702	0.577136	0.492239	0.00866609	0.193117	0.0621977	0.634051	0.268896	0.0108339	0.488126
OR4C11	0.263037	59	0.0441366	0.577136	0.492239	0.0135661	0.273087	0.0417113	0.583711	0.22069	0.0990102	0.749265
TRAPPC1	0.383117	28	0.0441819	0.577136	0.492239	0.0472448	0.395514	0.0411492	0.580907	0.398333	0.0357765	0.624205
NFE2L1	0.215009	88	0.0442501	0.577136	0.492239	0.0165509	0.221165	0.0445044	0.589881	0.171027	0.129307	0.778229
FGF11	0.267451	57	0.0442962	0.577136	0.492239	0.0238976	0.39457	0.00345956	0.351475	0.26371	0.0540072	0.683878
OSBPL8	0.213662	89	0.0443818	0.577136	0.492239	0.0109804	0.21798	0.0463814	0.590582	0.19606	0.0793999	0.723352
SLC7A14	0.210046	92	0.0444709	0.577136	0.492239	0.0168971	0.223806	0.0360698	0.570443	0.162731	0.136743	0.786657
STRIP2	0.217262	86	0.0444958	0.577136	0.492239	0.0125337	0.218033	0.052029	0.60753	0.127446	0.266162	0.858676
TOPORS	0.193766	108	0.0445021	0.577136	0.492239	0.00970156	0.192776	0.0534312	0.612826	0.152797	0.131074	0.778275
CACNA1S	0.200297	101	0.0446108	0.577136	0.492239	0.007842	0.208104	0.044142	0.589881	0.193149	0.0681558	0.700938
RWDD2A	0.22233	82	0.0446878	0.577345	0.492417	0.0148138	0.21257	0.0616962	0.633309	0.114451	0.331558	0.879168
RANBP10	0.235666	73	0.0447347	0.577413	0.492475	0.00960799	0.252591	0.0348915	0.569827	0.244162	0.0464601	0.659239
INA	0.227923	78	0.0447541	0.577413	0.492475	0.014433	0.221054	0.0583991	0.623335	0.206702	0.0860072	0.734996
OR51T1	0.198986	102	0.0449637	0.579419	0.494186	0.0107926	0.221408	0.0310614	0.550486	0.236391	0.0217997	0.563695
TMEM208	0.274001	54	0.0449707	0.579419	0.494186	0.0205016	0.255113	0.0708049	0.645343	0.187679	0.191839	0.819333
PELI2	0.241643	69	0.0454662	0.580031	0.494708	0.0118533	0.253725	0.0382863	0.57504	0.248644	0.051331	0.674221
DLST	0.203578	97	0.0454983	0.580031	0.494708	0.00780415	0.213892	0.0441476	0.589881	0.169653	0.116197	0.76089
TMEM132A	0.203549	97	0.0455302	0.580031	0.494708	0.0101402	0.20739	0.0525245	0.609252	0.160395	0.140146	0.787878
FAM83H	0.205677	95	0.0455445	0.580031	0.494708	0.00877117	0.219555	0.0387063	0.577423	0.259367	0.0171982	0.537954
ACAA2	0.196525	104	0.0455554	0.580031	0.494708	0.00982049	0.178452	0.0819366	0.664003	0.143624	0.169611	0.806745
AMD1	0.299598	45	0.045565	0.580031	0.494708	0.0251679	0.307333	0.0449908	0.589881	0.250084	0.114802	0.760314
GGT7	0.217101	85	0.045955	0.580031	0.494708	0.0130547	0.230908	0.0406188	0.578723	0.193642	0.0893735	0.738904
TIE1	0.188088	113	0.0460411	0.580031	0.494708	0.0074501	0.194953	0.0473468	0.593591	0.207725	0.037122	0.629701
DNAJB1	0.248195	65	0.0462068	0.580669	0.495252	0.0246514	0.267614	0.0370614	0.570443	0.0879213	0.507862	0.931008
WNT16	0.209452	91	0.0463069	0.580669	0.495252	0.015906	0.212301	0.0483664	0.597827	0.191801	0.0862828	0.734996
PELO	0.254057	62	0.0463098	0.580669	0.495252	0.0258733	0.253306	0.0508433	0.603754	0.208514	0.126584	0.77565
FKBP10	0.195779	104	0.0463989	0.580793	0.495357	0.00824821	0.202736	0.0475911	0.593854	0.199759	0.0535667	0.683133
ASPRV1	0.189328	111	0.0465741	0.580793	0.495357	0.00481345	0.216628	0.028749	0.542811	0.206122	0.0406704	0.642474
SPRR1A	0.216498	85	0.0465763	0.580793	0.495357	0.011631	0.236857	0.0355815	0.570443	0.183465	0.112649	0.758895
SPIRE1	0.196562	103	0.046591	0.580793	0.495357	0.00946958	0.203806	0.0464061	0.590582	0.198122	0.0542773	0.68506
RGPD8	0.212704	88	0.0466305	0.580793	0.495357	0.0116633	0.219228	0.0464517	0.590582	0.163403	0.144955	0.791377
OR4S2	0.26702	56	0.0466563	0.580793	0.495357	0.0183897	0.269705	0.0464466	0.590582	0.263604	0.0589974	0.690984
OR51F2	0.19936	100	0.0467518	0.580793	0.495357	0.0144065	0.215965	0.0355555	0.570443	0.230633	0.0296727	0.600274
DLD	0.221505	81	0.046887	0.581178	0.495686	0.0131874	0.226254	0.0509505	0.603754	0.174721	0.142125	0.789172
SNX18	0.247408	65	0.0469258	0.581279	0.495772	0.0167429	0.239197	0.0590184	0.625926	0.1028	0.44255	0.915286
XBP1	0.211168	89	0.0469829	0.581372	0.495852	0.016691	0.210989	0.0525867	0.609252	0.259274	0.0210351	0.558038
GPR137C	0.221369	81	0.0470255	0.581372	0.495852	0.0202449	0.282961	0.0132582	0.470022	0.186411	0.111781	0.758895
CDH23	0.188041	112	0.047093	0.581568	0.496019	0.00675349	0.217515	0.0273075	0.53774	0.202662	0.0410715	0.642811
SLC5A12	0.191476	108	0.0471297	0.581568	0.496019	0.0072611	0.182346	0.0694029	0.645343	0.202961	0.0461714	0.658021
PDZD7	0.186328	114	0.0471523	0.581568	0.496019	0.00705417	0.183937	0.0616077	0.633309	0.228882	0.0206723	0.558038
DYNC1I1	0.233112	73	0.0471698	0.581568	0.496019	0.0115874	0.182583	0.127506	0.717765	0.250175	0.0427714	0.647159
POMGNT1	0.196997	102	0.0471949	0.581568	0.496019	0.00868162	0.18857	0.0657762	0.645343	0.212653	0.0407087	0.642474
ST3GAL4-AS1	0.276356	52	0.0473459	0.582671	0.49696	0.00877741	0.256929	0.0812663	0.661985	0.392853	0.00692025	0.46893
FAM83C	0.188586	111	0.0474556	0.583264	0.497465	0.0076498	0.205122	0.0396166	0.577995	0.162644	0.107732	0.753807
ALDH3A1	0.209463	90	0.047546	0.583618	0.497767	0.00904816	0.201197	0.0716879	0.646512	0.256901	0.0206035	0.558038
KRT73	0.193813	105	0.0475863	0.583733	0.497866	0.0166705	0.197541	0.0488351	0.60003	0.205918	0.0441387	0.648143
TCRBV1S1A1N1	0.210543	89	0.0476541	0.584187	0.498253	0.00925437	0.21731	0.0457407	0.59035	0.291253	0.00920965	0.484027
MTCH1	0.278489	51	0.0478338	0.585254	0.499162	0.0268627	0.270367	0.0602618	0.630285	0.188073	0.20552	0.826745
UNC45B	0.197303	101	0.0479648	0.585901	0.499715	0.00781865	0.217869	0.0349045	0.569827	0.234015	0.0255756	0.5891
FBXO44	0.22751	76	0.0480965	0.585901	0.499715	0.0117485	0.226862	0.0535947	0.613205	0.191751	0.122981	0.769801
EIF6	0.20774	91	0.0481622	0.585901	0.499715	0.0126266	0.182563	0.0964838	0.685805	0.179748	0.106117	0.753807
PAPD7	0.218837	82	0.0482407	0.585901	0.499715	0.0160699	0.214565	0.0645201	0.643197	0.251297	0.030794	0.603667
GRM6	0.193177	105	0.0483339	0.585901	0.499715	0.0181636	0.211892	0.0372004	0.570443	0.268907	0.00841353	0.481122
MSMO1	0.211112	88	0.0483359	0.585901	0.499715	0.0153204	0.218906	0.0454373	0.59035	0.248443	0.0262746	0.591925
ASB14	0.195927	102	0.0484333	0.585901	0.499715	0.0141917	0.197951	0.0519437	0.60753	0.189779	0.0699998	0.703268
SERINC1	0.22133	80	0.0484931	0.585901	0.499715	0.0121218	0.221588	0.0560557	0.61877	0.247018	0.03925	0.636065
DSG1	0.18519	114	0.0485416	0.585901	0.499715	0.00545222	0.195979	0.0461717	0.590582	0.237986	0.0154904	0.531131
PON1	0.190287	108	0.0485445	0.585901	0.499715	0.00791648	0.193745	0.054668	0.615475	0.181648	0.0749656	0.715102
RNF38	0.262462	57	0.0485673	0.585901	0.499715	0.0251267	0.278183	0.0437045	0.589881	0.249521	0.0774278	0.717705
HIST1H2AK	0.415374	23	0.0487156	0.586864	0.500536	0.105275	0.474221	0.0298625	0.54357	0.492368	0.0274261	0.591925
PCDHB3	0.204892	93	0.0488225	0.58711	0.500745	0.00530935	0.193271	0.0712043	0.645343	0.257093	0.0182348	0.551354
SLC25A12	0.222245	79	0.0490027	0.588158	0.50164	0.0140321	0.237842	0.0399017	0.577995	0.185399	0.118953	0.764424
LOC149086	0.220843	80	0.0490028	0.588158	0.50164	0.00670499	0.208602	0.0744905	0.649536	0.29684	0.0125834	0.500376
DYRK2	0.225054	77	0.0490834	0.588306	0.501766	0.0124499	0.241512	0.0381733	0.57504	0.253442	0.0370361	0.629282
TAS1R2	0.192495	105	0.0491463	0.588306	0.501766	0.0118773	0.196442	0.0525422	0.609252	0.182328	0.0738635	0.713737
KRT9	0.217932	82	0.0491984	0.588306	0.501766	0.00988484	0.220827	0.0536124	0.613205	0.292852	0.0107804	0.488126
CLTA	0.257175	59	0.0492589	0.588306	0.501766	0.025103	0.254109	0.0564668	0.619925	0.17828	0.192829	0.819333
OR51I1	0.203396	94	0.0492735	0.588306	0.501766	0.0188075	0.206819	0.0518196	0.60753	0.323651	0.00267216	0.41393
IQCJ-SCHIP1	0.210239	88	0.0492932	0.588306	0.501766	0.011438	0.208564	0.0616917	0.633309	0.135559	0.233584	0.842237
JAKMIP2	0.257077	59	0.0493488	0.588306	0.501766	0.020036	0.261833	0.0512551	0.604922	0.290575	0.0347937	0.624205
OR51M1	0.192301	105	0.0493796	0.588306	0.501766	0.0194803	0.213714	0.0327605	0.558146	0.159705	0.122117	0.769193
DMTN	0.227551	75	0.0496005	0.588751	0.502145	0.013907	0.21477	0.0700339	0.645343	0.230474	0.0586453	0.690984
TM2D2	0.239005	68	0.0496584	0.588751	0.502145	0.0150295	0.226784	0.069268	0.645343	0.176493	0.166448	0.804634
SELENBP1	0.190246	107	0.0496734	0.588751	0.502145	0.00609291	0.19544	0.0525443	0.609252	0.190137	0.0607582	0.692403
UPK1B	0.221565	79	0.0497177	0.588751	0.502145	0.0101399	0.206656	0.077299	0.65537	0.255174	0.0282221	0.596627
SNAP91	0.198734	98	0.0497928	0.588751	0.502145	0.00763997	0.208243	0.0463731	0.590582	0.201413	0.0583967	0.690984
SMAP1	0.195691	101	0.0498557	0.588751	0.502145	0.00962429	0.249128	0.0160352	0.484251	0.190978	0.0682168	0.700938
CDC37	0.224285	77	0.0498839	0.588751	0.502145	0.0153011	0.23825	0.0409393	0.57968	0.128526	0.288979	0.868825
MYH8	0.200686	96	0.0499315	0.588751	0.502145	0.0107456	0.169474	0.110295	0.697442	0.205287	0.0564608	0.686643
RGS2	0.224211	77	0.0499609	0.588751	0.502145	0.00921564	0.236388	0.0455924	0.59035	0.208567	0.0787187	0.722285
TMPRSS13	0.190865	106	0.0500159	0.588751	0.502145	0.0048986	0.217604	0.0296443	0.542811	0.202159	0.0494543	0.666243
ANXA7	0.191606	105	0.0502232	0.589244	0.502565	0.00895621	0.206684	0.042235	0.584034	0.165288	0.113346	0.758895
OR4K15	0.221078	79	0.0502337	0.589244	0.502565	0.0186954	0.215654	0.0613519	0.633309	0.250486	0.0364877	0.626715
OR5A1	0.192492	104	0.0502696	0.589244	0.502565	0.0101221	0.239952	0.0179178	0.490266	0.179314	0.080447	0.727173
BTBD9	0.214295	84	0.0502984	0.589244	0.502565	0.0112175	0.223858	0.0432039	0.589821	0.240005	0.0380783	0.631493
FLNB	0.197162	99	0.0504572	0.589913	0.503136	0.0124884	0.184539	0.0749837	0.651586	0.168073	0.113311	0.758895
AMY2A	0.202239	94	0.0506072	0.590165	0.503351	0.0092435	0.191126	0.0761786	0.654263	0.195896	0.0706625	0.705805
TRIM21	0.192192	104	0.050636	0.590165	0.503351	0.00937904	0.185934	0.0727718	0.647513	0.251024	0.0157959	0.531995
LRFN4	0.227963	74	0.0507688	0.590165	0.503351	0.0110951	0.244446	0.0414095	0.582112	0.214086	0.081925	0.728359
REC8	0.185007	112	0.050837	0.590165	0.503351	0.00660779	0.184779	0.0629958	0.635973	0.169734	0.0897145	0.738904
ATXN7	0.184994	112	0.0508527	0.590165	0.503351	0.0150419	0.230731	0.0184504	0.490266	0.187864	0.0599311	0.692403
SPINK4	0.211229	86	0.0509047	0.590237	0.503412	0.0101165	0.206717	0.0658036	0.645343	0.226553	0.0506365	0.672755
RHBDL1	0.20298	93	0.0510147	0.590237	0.503412	0.00706612	0.190744	0.0750531	0.651757	0.270069	0.0135415	0.516352
ASB4	0.208625	88	0.0511024	0.590892	0.503971	0.00918858	0.216631	0.0506012	0.603231	0.145983	0.196323	0.823216
DHX34	0.182153	115	0.0513713	0.592211	0.505097	0.00533341	0.175072	0.0740498	0.648069	0.169016	0.0878801	0.738098
SMCR7L	0.219866	79	0.0515402	0.592876	0.505663	0.017967	0.23368	0.0436152	0.589881	0.178539	0.128018	0.778229
BLOC1S6	0.214161	83	0.0518799	0.593672	0.506342	0.012853	0.215703	0.0531154	0.612306	0.262365	0.0229674	0.570692
C1orf21	0.352281	31	0.0519394	0.593672	0.506342	0.0418525	0.356364	0.0490958	0.60003	0.346715	0.0653854	0.695779
GSTT2	0.229998	72	0.0519455	0.593672	0.506342	0.0091355	0.282569	0.0205126	0.506122	0.182779	0.151623	0.795614
RNF111	0.197938	97	0.0519599	0.593672	0.506342	0.0144166	0.208438	0.0499739	0.601767	0.140021	0.193206	0.819333
RNF39	0.219329	79	0.0521268	0.593672	0.506342	0.00926755	0.191312	0.107434	0.694614	0.159367	0.187574	0.817068
CNNM1	0.196683	98	0.0522479	0.593672	0.506342	0.00863179	0.207025	0.0476951	0.594024	0.168833	0.115843	0.760841
RGPD6	0.205284	90	0.0522591	0.593672	0.506342	0.0116759	0.215838	0.0472653	0.59344	0.160353	0.147584	0.794568
COL19A1	0.185569	110	0.0522681	0.593672	0.506342	0.0132148	0.186745	0.0628335	0.635973	0.158121	0.116128	0.760841
OLFM2	0.251754	60	0.0523272	0.593672	0.506342	0.0104027	0.265372	0.0440862	0.589881	0.197677	0.151909	0.795788
FAM81A	0.229614	72	0.0523495	0.593672	0.506342	0.0146446	0.211814	0.0829159	0.664497	0.258755	0.0374099	0.630097
PFDN5	0.308878	40	0.0524665	0.593672	0.506342	0.0199894	0.303434	0.0569908	0.621884	0.282509	0.095031	0.74523
EFTUD2	0.308819	40	0.052514	0.593672	0.506342	0.031749	0.306167	0.0693614	0.645343	0.199228	0.244057	0.844233
IFNA7	0.216222	81	0.0525314	0.593672	0.506342	0.0123659	0.212663	0.070863	0.645343	0.236729	0.0437516	0.647159
NR1H4	0.19645	98	0.0525335	0.593672	0.506342	0.00915172	0.18759	0.0733529	0.647513	0.168912	0.115672	0.760841
CCDC85B	0.301225	42	0.0525575	0.593672	0.506342	0.0238565	0.298971	0.0644766	0.643197	0.309989	0.0547943	0.68592
FAM84A	0.247352	62	0.0525924	0.593672	0.506342	0.0249206	0.257628	0.0530205	0.612031	0.124065	0.353473	0.887344
RCOR2	0.232643	70	0.052615	0.593672	0.506342	0.0280845	0.23956	0.0491151	0.60003	0.21971	0.0835976	0.730309
KRT40	0.189592	105	0.052734	0.59373	0.506392	0.0121807	0.20276	0.0430554	0.589821	0.171504	0.0965487	0.747565
PTGES2	0.195232	99	0.0528011	0.593768	0.506425	0.00946819	0.214204	0.0426313	0.586521	0.163617	0.123338	0.769801
OR5AP2	0.210754	85	0.052856	0.593768	0.506425	0.0109997	0.207017	0.0689789	0.645343	0.197357	0.0832828	0.730309
OR4F4	0.225836	74	0.0530256	0.594616	0.507147	0.0160466	0.224047	0.0567124	0.620583	0.126664	0.307065	0.874529
MCTP1	0.195761	98	0.0533834	0.595961	0.508294	0.00460772	0.19267	0.068856	0.645343	0.224434	0.0344788	0.623318
SLC4A3	0.193772	100	0.0533955	0.595961	0.508294	0.0108384	0.22948	0.0260876	0.530466	0.14754	0.162823	0.801396
CNGA4	0.194621	99	0.0535621	0.595961	0.508294	0.00816133	0.252084	0.0153449	0.48339	0.161452	0.128448	0.778229
SLITRK3	0.198631	95	0.0536491	0.595961	0.508294	0.00909064	0.215778	0.0447239	0.589881	0.214581	0.0472555	0.659239
SLC25A22	0.215115	81	0.0537823	0.59627	0.508559	0.00803144	0.230477	0.0451768	0.589881	0.190215	0.109503	0.758781
RNF187	0.289384	45	0.0538433	0.59627	0.508559	0.00932232	0.295854	0.0571294	0.622415	0.220345	0.171858	0.807253
ZNF12	0.196293	97	0.0539802	0.59627	0.508559	0.0266353	0.350549	0.000705915	0.243731	0.283115	0.00752214	0.469175
PRKG2	0.211034	84	0.0539878	0.59627	0.508559	0.0104603	0.217504	0.0511131	0.604386	0.260447	0.0230707	0.570692
TAS2R38	0.190431	103	0.0540108	0.59627	0.508559	0.0100258	0.186879	0.0697748	0.645343	0.206672	0.0468528	0.659239
MTDH	0.195238	98	0.0540365	0.59627	0.508559	0.0106484	0.219184	0.0368489	0.570443	0.144293	0.174825	0.809304
CREG2	0.23819	66	0.0541157	0.59627	0.508559	0.0122545	0.22773	0.0775454	0.655655	0.211209	0.111494	0.758895
G3BP2	0.258739	56	0.0541692	0.59627	0.508559	0.0325564	0.261452	0.061174	0.633179	0.254302	0.0688728	0.702991
ABCB9	0.198174	95	0.0542135	0.59627	0.508559	0.00697284	0.21091	0.0447737	0.589881	0.124607	0.258754	0.854312
STRADB	0.194065	99	0.0542614	0.59627	0.508559	0.00617479	0.220606	0.0326275	0.557321	0.144296	0.177299	0.810058
RALGAPB	0.218611	78	0.0544962	0.597368	0.509495	0.0125141	0.24402	0.038859	0.577596	0.190265	0.111994	0.758895
SFRP4	0.205669	88	0.05456	0.597368	0.509495	0.0140189	0.210015	0.055185	0.617283	0.194944	0.0851349	0.733136
CYP4B1	0.188062	105	0.0547094	0.597368	0.509495	0.00921992	0.177481	0.077304	0.65537	0.0941946	0.369136	0.89284
C12orf28	0.186253	107	0.0547533	0.597368	0.509495	0.0121334	0.169353	0.0920993	0.680005	0.172212	0.0951587	0.74523
SIAH2	0.310039	39	0.0547535	0.597368	0.509495	0.0431067	0.356993	0.0300821	0.544655	0.0964341	0.587448	0.943158
HS3ST3B1	0.219747	77	0.0548229	0.597782	0.509847	0.0135633	0.230993	0.0543629	0.615475	0.151827	0.212998	0.83075
NOX5	0.239264	65	0.0549138	0.598428	0.510399	0.0225469	0.233011	0.0707333	0.645343	0.282516	0.0332313	0.619574
PVRL3	0.218133	78	0.0550387	0.599099	0.510971	0.0125509	0.222678	0.0582822	0.623335	0.214868	0.0699033	0.702991
KLF12	0.270268	51	0.0550968	0.599388	0.511217	0.0262914	0.273284	0.0574404	0.62278	0.109752	0.472948	0.921136
TRIM29	0.187714	105	0.0551671	0.599808	0.511575	0.0105066	0.219699	0.0314956	0.550486	0.220047	0.0321375	0.614956
ADAM10	0.202821	90	0.0552114	0.599945	0.511693	0.0111744	0.214437	0.0487553	0.599731	0.208824	0.0613609	0.692563
CREM	0.223777	74	0.0552877	0.600295	0.511991	0.018182	0.19901	0.103744	0.693248	0.199564	0.102764	0.751699
LONRF2	0.22225	75	0.055307	0.600295	0.511991	0.0148102	0.213549	0.0803688	0.658646	0.214539	0.0812656	0.72799
ARSH	0.240665	64	0.0554117	0.600399	0.51208	0.017206	0.22188	0.0856901	0.670079	0.291949	0.0275537	0.591925
LDLRAD3	0.209731	84	0.055522	0.600505	0.51217	0.0115409	0.227993	0.0446862	0.589881	0.207866	0.0696696	0.702991
AVPR1A	0.187437	105	0.0555337	0.600505	0.51217	0.00701819	0.18813	0.0649845	0.645343	0.167209	0.103455	0.752653
NKX3-2	0.22053	76	0.05558	0.600505	0.51217	0.0212453	0.230653	0.0547283	0.615475	0.149778	0.21931	0.83531
PAPSS2	0.190105	102	0.0556462	0.600535	0.512196	0.00899634	0.227091	0.0268906	0.535049	0.212901	0.0427477	0.647159
PLCXD3	0.272275	50	0.0557615	0.601297	0.512846	0.0281303	0.283787	0.0559702	0.618744	0.18836	0.220777	0.83531
CTDSPL	0.244175	62	0.0558033	0.601297	0.512846	0.0174067	0.266009	0.039944	0.577995	0.221151	0.0982891	0.74795
TMEM59	0.215838	79	0.0560796	0.602909	0.51422	0.0104202	0.211234	0.0669953	0.645343	0.210623	0.0778883	0.718105
SULT1E1	0.200988	91	0.056089	0.602909	0.51422	0.0141414	0.20566	0.0545706	0.615475	0.189407	0.0903542	0.739137
REV1	0.181819	111	0.0561528	0.60291	0.514222	0.0117204	0.170113	0.0858094	0.670079	0.177606	0.0770917	0.717422
HNRNPUL2	0.205426	87	0.0562898	0.603601	0.514811	0.0142307	0.232122	0.037051	0.570443	0.126108	0.271258	0.860462
TOB1	0.234237	67	0.0564083	0.603601	0.514811	0.0165139	0.260312	0.0410169	0.580257	0.161162	0.218639	0.834794
SLC6A7	0.203998	88	0.0565968	0.604593	0.515657	0.0110516	0.230983	0.0368109	0.570443	0.151916	0.173051	0.808152
DGCR14	0.201533	90	0.0568091	0.60555	0.516473	0.00891655	0.195662	0.0710057	0.645343	0.228339	0.0403367	0.642474
ADH1C	0.198198	93	0.0568527	0.60555	0.516473	0.00891697	0.192437	0.0741479	0.648069	0.189876	0.0817678	0.72799
TRANK1	0.179607	113	0.0569708	0.60555	0.516473	0.0066218	0.196098	0.0460366	0.590582	0.205527	0.0382361	0.631493
PAX2	0.311438	38	0.0569964	0.60555	0.516473	0.0243632	0.328937	0.0501287	0.601767	0.271857	0.114144	0.75914
PTPRT	0.239093	64	0.0570737	0.60555	0.516473	0.015648	0.244415	0.055555	0.617948	0.220902	0.0956398	0.745373
EBF4	0.219137	76	0.0571821	0.60555	0.516473	0.0199602	0.238069	0.0471894	0.59344	0.197194	0.104359	0.753807
FZD2	0.339499	32	0.0573037	0.60555	0.516473	0.03469	0.34305	0.068477	0.645343	0.333832	0.0664505	0.698215
KCNAB3	0.208127	84	0.0574602	0.606293	0.517107	0.0145317	0.198124	0.0781205	0.656365	0.141758	0.225061	0.837993
ADO	0.211945	81	0.0574989	0.606364	0.517167	0.0290815	0.217307	0.0647817	0.644447	0.0929233	0.434257	0.913909
VPS37A	0.20323	88	0.057554	0.606607	0.517374	0.010645	0.233377	0.0326403	0.557321	0.233591	0.0346778	0.624205
OR11L1	0.231033	68	0.0580183	0.608066	0.518619	0.0199432	0.23861	0.0618096	0.633309	0.232201	0.0648462	0.695461
PKN1	0.190186	100	0.0580541	0.608066	0.518619	0.0209628	0.221699	0.0346864	0.568527	0.184386	0.0768423	0.7172
GRM3	0.202791	88	0.0581079	0.608066	0.518619	0.00901557	0.207095	0.0572078	0.622415	0.24303	0.030917	0.603667
HES7	0.229225	69	0.0581433	0.608066	0.518619	0.0226075	0.256159	0.0410419	0.580257	0.129164	0.313018	0.875323
PIGF	0.205078	86	0.0582018	0.608066	0.518619	0.0108821	0.215354	0.0535102	0.612826	0.165179	0.145736	0.792135
LAMTOR4	0.323207	35	0.0582437	0.608066	0.518619	0.0227848	0.329379	0.0571423	0.622415	0.332832	0.0584099	0.690984
FAM214B	0.191879	98	0.0583896	0.608066	0.518619	0.0137511	0.209607	0.0449277	0.589881	0.139669	0.19175	0.819333
AX747795	0.375937	26	0.0583929	0.608066	0.518619	0.00396569	0.355308	0.0961578	0.685724	0.460089	0.0206585	0.558038
CPNE6	0.212509	80	0.0584242	0.608066	0.518619	0.0129779	0.189561	0.103339	0.691768	0.295846	0.011046	0.488854
TAF5	0.200101	90	0.0586291	0.608066	0.518619	0.0075213	0.192068	0.0782383	0.656365	0.173661	0.118687	0.764424
CXXC4	0.375584	26	0.0586492	0.608066	0.518619	0.0338258	0.403031	0.0508464	0.603754	0.349341	0.0869539	0.736814
TNPO2	0.305329	39	0.0587368	0.608066	0.518619	0.0375533	0.326555	0.0485373	0.597827	0.213019	0.205563	0.826745
ZNF366	0.177548	114	0.0587789	0.608066	0.518619	0.0103848	0.184164	0.0587841	0.625276	0.186408	0.0593887	0.692047
YTHDF3	0.251761	57	0.058865	0.608066	0.518619	0.0152207	0.287255	0.0334657	0.561414	0.261349	0.058721	0.690984
FAM171A2	0.230152	68	0.0590085	0.608477	0.51897	0.00928372	0.25144	0.0486843	0.599248	0.23697	0.0614898	0.692563
PRRT1	0.260993	53	0.0590778	0.608477	0.51897	0.0168447	0.272034	0.055988	0.618744	0.213307	0.145478	0.791988
FFAR4	0.193178	96	0.059327	0.609488	0.519831	0.00938917	0.199158	0.0613339	0.633309	0.169333	0.116897	0.762709
CNNM4	0.185448	104	0.0594657	0.609488	0.519831	0.0111459	0.170969	0.0958143	0.685122	0.19321	0.0620692	0.692563
TMEM115	0.210277	81	0.0595379	0.609488	0.519831	0.0143069	0.205409	0.0712124	0.645343	0.238731	0.0391435	0.635595
RPL3L	0.213946	78	0.059992	0.6111	0.521206	0.0183437	0.222534	0.0566906	0.620583	0.276586	0.0195467	0.555365
GJA1	0.242092	61	0.0601423	0.61143	0.521488	0.0141962	0.225626	0.0885777	0.67317	0.203512	0.132482	0.781394
PNLIPRP1	0.178087	112	0.0603	0.61147	0.521523	0.0124441	0.177777	0.071001	0.645343	0.198491	0.0433936	0.647159
LRFN2	0.195461	93	0.060434	0.611769	0.521778	0.00729561	0.200501	0.0625954	0.635727	0.180554	0.0982094	0.74795
MEGF10	0.186472	102	0.0605786	0.611808	0.52181	0.00914813	0.185455	0.0689643	0.645343	0.171589	0.101949	0.751564
MTAP	0.209231	81	0.060845	0.612981	0.522811	0.00583251	0.220057	0.0544729	0.615475	0.223748	0.0570522	0.687068
OR6P1	0.191943	96	0.0610025	0.613589	0.52333	0.00910173	0.197417	0.0606956	0.631692	0.185547	0.0871926	0.736878
COX17	0.310852	37	0.0611192	0.61411	0.523774	0.0205869	0.30144	0.073998	0.648069	0.319948	0.0571341	0.687068
CYP2R1	0.182451	106	0.0612178	0.614449	0.524063	0.00861444	0.168434	0.0939045	0.682112	0.226556	0.0256487	0.589645
KIF5B	0.214197	77	0.0614001	0.61522	0.524721	0.0235908	0.231647	0.0502403	0.602572	0.165987	0.169663	0.806745
LRRFIP2	0.182278	106	0.0614675	0.61522	0.524721	0.00760524	0.187994	0.063778	0.639842	0.165338	0.107429	0.753807
CYP3A4	0.193499	94	0.0616725	0.615425	0.524895	0.00961867	0.190941	0.0747474	0.650295	0.182866	0.0939079	0.745176
ZNF155	0.199979	88	0.0617531	0.615533	0.524987	0.0122822	0.227542	0.0397925	0.577995	0.183466	0.103312	0.752111
UCP2	0.203486	85	0.0617808	0.615533	0.524987	0.0173397	0.203398	0.0685734	0.645343	0.182626	0.10952	0.758781
OR52E2	0.200871	87	0.0621019	0.617433	0.526608	0.016918	0.193044	0.0822754	0.664003	0.183628	0.10991	0.758895
LPHN1	0.230596	66	0.0624946	0.618615	0.527616	0.0189038	0.23229	0.0669559	0.645343	0.145456	0.271672	0.861197
IDI1	0.204075	84	0.0626034	0.618615	0.527616	0.0131628	0.242168	0.0338419	0.562971	0.180068	0.114666	0.759943
ZNF442	0.300955	39	0.0626401	0.618615	0.527616	0.0205361	0.327839	0.0476084	0.593854	0.205638	0.235975	0.842678
HTRA1	0.23594	63	0.0626606	0.618615	0.527616	0.0172028	0.261927	0.0490446	0.60003	0.190074	0.160577	0.801396
FMNL2	0.193791	93	0.0627067	0.618615	0.527616	0.0150438	0.210313	0.0492109	0.60003	0.102324	0.351409	0.88639
ABCB11	0.175464	113	0.0630388	0.619593	0.52845	0.00954428	0.153827	0.117178	0.708495	0.170026	0.0891546	0.738904
RGPD3	0.197729	89	0.063257	0.619771	0.528602	0.0112993	0.199961	0.0682004	0.645343	0.17026	0.126193	0.77452
OGFRL1	0.182782	104	0.0632868	0.619771	0.528602	0.00974544	0.211753	0.0373272	0.570793	0.233234	0.0229265	0.570692
SLC2A4	0.188333	98	0.0632922	0.619771	0.528602	0.00633577	0.241014	0.0206486	0.506122	0.142846	0.184287	0.8164
OR5D16	0.218309	73	0.0635264	0.620762	0.529447	0.0206819	0.218786	0.0708988	0.645343	0.154827	0.214498	0.831289
MEST	0.261754	51	0.0635323	0.620762	0.529447	0.0256366	0.27761	0.0534515	0.612826	0.16285	0.268761	0.859551
SERBP1	0.24093	60	0.0636828	0.620762	0.529447	0.0202168	0.26867	0.0414249	0.582112	0.189413	0.162065	0.801396
UBE2J1	0.208296	80	0.0637209	0.620762	0.529447	0.0112723	0.217115	0.0578665	0.62278	0.167724	0.15905	0.799391
KCNJ13	0.197265	89	0.0638911	0.620762	0.529447	0.0190873	0.156207	0.158478	0.74902	0.178657	0.106097	0.753807
AMMECR1	0.275415	46	0.0639461	0.620762	0.529447	0.0190639	0.270785	0.0754274	0.65321	0.239999	0.130685	0.778229
PTPRK	0.227626	67	0.0639485	0.620762	0.529447	0.0227419	0.232488	0.0645055	0.643197	0.151453	0.248029	0.846965
TRPC5	0.21357	76	0.0639629	0.620762	0.529447	0.0143567	0.217021	0.0711366	0.645343	0.165091	0.185274	0.816495
AMY2B	0.187855	98	0.0639772	0.620762	0.529447	0.00707879	0.186426	0.0720042	0.646881	0.203451	0.057277	0.687096
ATRAID	0.179631	107	0.064114	0.621184	0.529807	0.00578274	0.164561	0.105399	0.693969	0.216138	0.0354046	0.624205
PLD2	0.183957	102	0.0641975	0.621184	0.529807	0.0101174	0.195358	0.0577973	0.62278	0.217345	0.0385008	0.631493
USP13	0.20662	81	0.064213	0.621184	0.529807	0.0185769	0.205646	0.0767259	0.654263	0.167383	0.151178	0.795281
DNAJC19	0.299124	39	0.0643338	0.621184	0.529807	0.0284923	0.255713	0.121249	0.713316	0.3064	0.0734234	0.713428
VWC2L	0.320602	34	0.0645117	0.621184	0.529807	0.0236019	0.321492	0.0680919	0.645343	0.225748	0.214114	0.831181
GRM8	0.200247	86	0.0645137	0.621184	0.529807	0.0128255	0.210446	0.0577327	0.62278	0.177741	0.119507	0.764925
NAMPT	0.223681	69	0.0646644	0.621184	0.529807	0.0221265	0.227468	0.0684111	0.645343	0.19362	0.134882	0.782665
PRRC2A	0.182725	103	0.064688	0.621184	0.529807	0.00763399	0.193064	0.0594805	0.628012	0.136692	0.193846	0.819333
KRT31	0.184517	101	0.0647202	0.621184	0.529807	0.00605916	0.200913	0.0521721	0.608546	0.184902	0.0744043	0.715102
KIAA1239	0.191264	94	0.0647978	0.621184	0.529807	0.0230619	0.185007	0.0862515	0.670565	0.254449	0.0195067	0.555365
TRAPPC5	0.360391	27	0.0647983	0.621184	0.529807	0.0506753	0.364479	0.061601	0.633309	0.336809	0.0858142	0.734819
CASR	0.179093	107	0.0649298	0.621184	0.529807	0.00839844	0.168438	0.0938961	0.682112	0.167109	0.103665	0.752653
TFCP2	0.265224	49	0.0655073	0.622199	0.530673	0.0183876	0.261084	0.0730701	0.647513	0.203631	0.174669	0.809304
HDC	0.178704	107	0.065523	0.622199	0.530673	0.00867223	0.17981	0.0734356	0.647513	0.131248	0.197678	0.824397
MNT	0.197204	88	0.0655318	0.622199	0.530673	0.0134339	0.239851	0.0289625	0.542811	0.222086	0.0477112	0.659239
CLASP1	0.210899	77	0.0656022	0.622199	0.530673	0.0150184	0.208796	0.0742151	0.648069	0.183843	0.127643	0.778229
GMPS	0.212268	76	0.0656391	0.622199	0.530673	0.0179584	0.237039	0.0481822	0.596927	0.194737	0.111531	0.758895
NFASC	0.191582	93	0.0658213	0.622199	0.530673	0.0100536	0.194672	0.067534	0.645343	0.193718	0.0793019	0.723352
RNF146	0.198111	87	0.0658549	0.622199	0.530673	0.0116984	0.199493	0.0741767	0.648069	0.151437	0.179944	0.814261
EPHA10	0.187435	97	0.0660006	0.622199	0.530673	0.0138114	0.210127	0.044387	0.589881	0.175378	0.100198	0.74945
CYP4F22	0.182737	102	0.0660159	0.622199	0.530673	0.0178812	0.176504	0.0888004	0.673426	0.10278	0.324247	0.878141
PPP3CB	0.323804	33	0.0660224	0.622199	0.530673	0.0347737	0.321204	0.0683534	0.645343	0.232294	0.200771	0.825179
SLC6A17	0.195728	89	0.0660306	0.622199	0.530673	0.0120864	0.189392	0.0825638	0.664003	0.220602	0.0492557	0.665462
DHX36	0.183494	101	0.0662441	0.622971	0.531331	0.0130288	0.179277	0.089064	0.674428	0.154488	0.143702	0.789365
ANXA3	0.193354	91	0.066305	0.623234	0.531556	0.00759791	0.190848	0.0801873	0.658306	0.25202	0.0241213	0.580004
OR2D2	0.196557	88	0.0664383	0.623559	0.531833	0.0130094	0.17652	0.112649	0.701742	0.182531	0.112086	0.758895
BATF3	0.242534	58	0.066599	0.623613	0.531879	0.027623	0.235433	0.0806843	0.659514	0.123441	0.37385	0.895496
RAPGEF2	0.18601	98	0.0666806	0.623613	0.531879	0.00657062	0.191313	0.0708701	0.645343	0.204162	0.0563942	0.686643
AP4E1	0.17792	107	0.0667336	0.623613	0.531879	0.00956371	0.193087	0.0542608	0.615117	0.153135	0.134262	0.782184
TCTA	0.253721	53	0.0667734	0.623613	0.531879	0.0170795	0.245668	0.0822693	0.664003	0.247275	0.0901815	0.739137
CXorf65	0.186772	97	0.0669809	0.624559	0.532686	0.0131214	0.190355	0.0707108	0.645343	0.11521	0.290829	0.869293
MARK1	0.196156	88	0.0670065	0.624559	0.532686	0.0150243	0.215441	0.0504616	0.602708	0.289077	0.00977091	0.484027
DFNB31	0.173633	112	0.067119	0.625299	0.533317	0.00755122	0.198294	0.0436063	0.589881	0.151653	0.132018	0.781133
KHDC1	0.253293	53	0.0672502	0.625614	0.533585	0.00637152	0.267334	0.0605399	0.631296	0.279243	0.0472084	0.659239
HADHB	0.187555	96	0.0672709	0.625614	0.533585	0.00897297	0.156095	0.144083	0.737553	0.247208	0.0217501	0.563695
IL1RN	0.188436	95	0.067437	0.626413	0.534267	0.00961989	0.170427	0.106282	0.693969	0.171434	0.114505	0.75941
SEPW1	0.260594	50	0.0675806	0.626512	0.534351	0.0347677	0.302182	0.0436443	0.589881	0.12407	0.439603	0.91462
DNASE1L2	0.187324	96	0.067615	0.626512	0.534351	0.00970425	0.178147	0.0987711	0.688931	0.197521	0.0650909	0.695461
CMTM5	0.213531	74	0.0677411	0.626512	0.534351	0.0158234	0.22149	0.0673975	0.645343	0.103737	0.407162	0.905613
HCN2	0.284491	42	0.0678491	0.626512	0.534351	0.0188324	0.308783	0.052543	0.609252	0.259394	0.115799	0.760841
MAFA	0.295394	39	0.067896	0.626512	0.534351	0.0133708	0.335989	0.0484571	0.597827	0.302349	0.0650392	0.695461
KRT6B	0.189098	94	0.0679487	0.626512	0.534351	0.00822431	0.194157	0.0698936	0.645343	0.242319	0.0273029	0.591925
KRTAP2-2	0.221039	69	0.0679716	0.626512	0.534351	0.00812094	0.228444	0.0672019	0.645343	0.236974	0.061485	0.692563
ATP13A2	0.177867	106	0.0681351	0.626512	0.534351	0.015662	0.196246	0.0540391	0.614055	0.189955	0.0666873	0.698215
OR10C1	0.241195	58	0.0681627	0.626512	0.534351	0.010168	0.214844	0.111809	0.699427	0.26488	0.0630311	0.694934
IL1RAPL1	0.239104	59	0.0681745	0.626512	0.534351	0.0303698	0.260612	0.0546427	0.615475	0.190097	0.172758	0.807399
PLS3	0.262734	49	0.068175	0.626512	0.534351	0.0227009	0.266742	0.073138	0.647513	0.179349	0.238461	0.842879
KCNJ3	0.265403	48	0.0682815	0.626512	0.534351	0.0170478	0.259031	0.0821601	0.664003	0.238085	0.111084	0.758895
FGF9	0.386735	23	0.0683087	0.626512	0.534351	0.0241477	0.392594	0.0707156	0.645343	0.357258	0.0942177	0.745176
EEF1B2	0.252319	53	0.0683451	0.626512	0.534351	0.0145865	0.264462	0.0607433	0.631692	0.249724	0.0771798	0.717422
OR5AN1	0.199805	84	0.0684207	0.626512	0.534351	0.020945	0.206192	0.0701178	0.645343	0.219998	0.0596431	0.692403
SLC26A5	0.18193	101	0.0686302	0.626512	0.534351	0.0109374	0.182244	0.0787422	0.656365	0.177033	0.0895841	0.738904
IGSF22	0.19843	85	0.0686839	0.626512	0.534351	0.02173	0.185379	0.101917	0.690366	0.206201	0.0719866	0.706425
ZNF583	0.189612	93	0.0687015	0.626512	0.534351	0.0157339	0.248533	0.0210322	0.508305	0.24313	0.0249539	0.584068
TMEM131	0.175806	108	0.0687632	0.62673	0.534537	0.0103877	0.180738	0.0690834	0.645343	0.126375	0.214983	0.832147
PEX5L	0.198317	85	0.0688451	0.626887	0.534672	0.0101141	0.204922	0.0664825	0.645343	0.101279	0.377614	0.896357
PCDH8	0.199448	84	0.0689269	0.627105	0.534857	0.010893	0.209522	0.0674251	0.645343	0.174119	0.129901	0.778229
EPHA7	0.238373	59	0.0690481	0.627412	0.535119	0.0212927	0.257999	0.0572026	0.622415	0.178317	0.197029	0.823806
NUMBL	0.186295	96	0.0691642	0.627412	0.535119	0.00928389	0.19973	0.0591082	0.626527	0.146849	0.172163	0.807399
DUSP26	0.223241	67	0.0693838	0.627412	0.535119	0.0153206	0.223246	0.0761919	0.654263	0.240207	0.0693347	0.702991
FMNL1	0.178746	104	0.0694498	0.627412	0.535119	0.0124175	0.186204	0.0678312	0.645343	0.257974	0.01254	0.500376
S1PR5	0.193265	89	0.0695796	0.627412	0.535119	0.011461	0.182011	0.0975126	0.685805	0.191825	0.0903479	0.739137
OR2K2	0.181218	101	0.0697397	0.627412	0.535119	0.00761261	0.17381	0.0956741	0.685122	0.180514	0.0850822	0.733136
CLPS	0.183982	98	0.069758	0.627412	0.535119	0.0124175	0.164504	0.12129	0.713316	0.146028	0.177144	0.810058
FBN2	0.194246	88	0.0697627	0.627412	0.535119	0.0135089	0.237021	0.0320311	0.554786	0.109288	0.337676	0.88055
WARS	0.18294	99	0.0699182	0.627412	0.535119	0.0091975	0.178919	0.0915466	0.679387	0.216248	0.0406459	0.642474
HMP19	0.289481	40	0.0700176	0.627412	0.535119	0.0183932	0.289878	0.0696173	0.645343	0.281607	0.0824295	0.730119
SLC27A5	0.183709	98	0.0701813	0.627412	0.535119	0.0137908	0.173861	0.0974266	0.685805	0.213866	0.0454171	0.653571
SMC5	0.175732	107	0.0702099	0.627412	0.535119	0.0132782	0.185891	0.0654462	0.645343	0.14082	0.171155	0.807253
GSDMA	0.18002	102	0.0702138	0.627412	0.535119	0.008803	0.191093	0.0607968	0.631692	0.217402	0.0384481	0.631493
XKR6	0.229578	63	0.0702977	0.627412	0.535119	0.012286	0.268436	0.0434907	0.589881	0.180669	0.182694	0.815959
DIEXF	0.174011	109	0.0703553	0.627412	0.535119	0.0122534	0.18443	0.0662237	0.645343	0.115011	0.252098	0.851484
ABHD16A	0.197254	85	0.0703758	0.627412	0.535119	0.0124365	0.211977	0.05746	0.62278	0.190241	0.0997502	0.749265
LMLN	0.179029	103	0.0703851	0.627412	0.535119	0.00680915	0.190057	0.0650696	0.645343	0.184764	0.0746244	0.715102
ILVBL	0.173142	110	0.0704711	0.627412	0.535119	0.0101226	0.174425	0.0795392	0.65715	0.150548	0.136908	0.78666
ARHGAP33	0.183509	98	0.0704928	0.627412	0.535119	0.0163481	0.198027	0.059887	0.629495	0.145932	0.169926	0.806745
APPBP2	0.278384	43	0.0706667	0.627619	0.535296	0.020186	0.259191	0.0932756	0.682112	0.261973	0.0937467	0.745176
FAXC	0.243378	56	0.0706871	0.627619	0.535296	0.0156879	0.239743	0.0779081	0.656365	0.211581	0.136102	0.786355
HOXA13	0.412472	20	0.0707148	0.627619	0.535296	0.0169922	0.581876	0.0112996	0.449696	0.312721	0.238284	0.842722
TMEM57	0.260181	49	0.0709981	0.628044	0.535658	0.0184683	0.266898	0.0697477	0.645343	0.216033	0.164113	0.802196
PPAP2B	0.205547	78	0.0710175	0.628044	0.535658	0.0239449	0.222429	0.05681	0.620583	0.212544	0.0751528	0.715102
TRIM8	0.232774	61	0.071028	0.628044	0.535658	0.0173496	0.229766	0.0773899	0.655429	0.198306	0.142891	0.789365
SBF2	0.181252	100	0.0711203	0.628352	0.535921	0.00898524	0.180018	0.0825292	0.664003	0.192022	0.071429	0.706425
CADPS	0.22883	63	0.0712419	0.628352	0.535921	0.0235993	0.227936	0.0798453	0.657482	0.212552	0.112427	0.758895
TCRBV7S1A1N2T	0.188925	92	0.0712923	0.628352	0.535921	0.0101346	0.188987	0.0813884	0.662385	0.200128	0.0662993	0.698064
OR2V1	0.205343	78	0.0713051	0.628352	0.535921	0.0138242	0.206587	0.0753579	0.653026	0.199685	0.105211	0.753807
NINJ1	0.209388	75	0.0713984	0.628352	0.535921	0.00947992	0.205306	0.0858734	0.670079	0.201903	0.0961781	0.746245
IDE	0.194112	87	0.0716168	0.628352	0.535921	0.00883894	0.214227	0.0563699	0.619925	0.2111	0.0618319	0.692563
DUSP22	0.212082	73	0.071655	0.628352	0.535921	0.0110445	0.239395	0.0492762	0.60003	0.199348	0.105813	0.753807
BLVRB	0.205012	78	0.0717725	0.628352	0.535921	0.0100851	0.19539	0.0952527	0.684857	0.156365	0.19613	0.82259
SLC22A7	0.172346	110	0.0717926	0.628352	0.535921	0.0176789	0.147482	0.137105	0.731344	0.123595	0.225326	0.837993
PAX9	0.22287	66	0.0720646	0.6296	0.536985	0.0135968	0.238908	0.0552864	0.617479	0.168744	0.189832	0.819333
GP1BA	0.171314	111	0.0722109	0.630138	0.537444	0.0118747	0.150883	0.130091	0.723276	0.237789	0.0166448	0.537954
GLRA4	0.189225	91	0.0724295	0.630612	0.537848	0.00884111	0.195493	0.0765357	0.654263	0.211502	0.0549299	0.68592
CA8	0.261534	48	0.0725588	0.630612	0.537848	0.0211759	0.27271	0.0699184	0.645343	0.281885	0.0741749	0.714495
A2ML1	0.187007	93	0.0726683	0.630856	0.538056	0.00679752	0.225962	0.0364422	0.570443	0.154129	0.161565	0.801396
NRIP1	0.172451	109	0.0729498	0.63151	0.538614	0.00997029	0.169516	0.0885152	0.67317	0.166549	0.0994294	0.749265
CD82	0.176548	104	0.0730054	0.63151	0.538614	0.00772668	0.171813	0.0924218	0.681038	0.276724	0.00663374	0.46893
CNOT11	0.227444	63	0.0730204	0.63151	0.538614	0.0342397	0.173166	0.185787	0.764898	0.124362	0.365663	0.891813
MYO1B	0.189847	90	0.0731001	0.631806	0.538867	0.0166194	0.193083	0.0784552	0.656365	0.192516	0.0812198	0.72799
TCRVA15	0.206684	76	0.0732344	0.632031	0.539059	0.00874403	0.198259	0.0974381	0.685805	0.166454	0.174892	0.809304
C12orf4	0.194163	86	0.073239	0.632031	0.539059	0.0145365	0.200113	0.0732626	0.647513	0.199346	0.0801605	0.725303
BNIP3L	0.231016	61	0.0732476	0.632031	0.539059	0.0176623	0.247391	0.0611681	0.633179	0.212061	0.11664	0.762448
UPK1A	0.184573	95	0.0733585	0.632481	0.539443	0.0131456	0.203415	0.0558863	0.618744	0.216889	0.0448714	0.651322
FRS2	0.216689	69	0.0737143	0.633784	0.540553	0.0219129	0.209405	0.0967752	0.685805	0.228609	0.0739077	0.713737
PLCH1	0.166651	116	0.0737805	0.633784	0.540553	0.0164948	0.158639	0.104329	0.693535	0.148963	0.131248	0.778276
DHX30	0.196007	84	0.0739546	0.633784	0.540553	0.0159188	0.204832	0.0739385	0.648069	0.17036	0.135907	0.786355
FKBP9L	0.247186	53	0.0743526	0.633784	0.540553	0.0222832	0.277065	0.0490328	0.60003	0.198279	0.176706	0.810044
ACSS2	0.173231	107	0.0743615	0.633784	0.540553	0.00452294	0.185481	0.066054	0.645343	0.207025	0.0418887	0.644609
TRPV1	0.173215	107	0.0743881	0.633784	0.540553	0.0107975	0.165545	0.103303	0.691768	0.145771	0.156446	0.79713
ZNF689	0.193386	86	0.0744186	0.633784	0.540553	0.0130644	0.189059	0.0930427	0.682112	0.19061	0.0946019	0.74523
DPF1	0.271689	44	0.07442	0.633784	0.540553	0.0359343	0.262503	0.0930602	0.682112	0.196604	0.224018	0.837063
SLC25A1	0.216086	69	0.0745396	0.633784	0.540553	0.0183719	0.216932	0.0801888	0.658306	0.119709	0.362274	0.890273
C1orf68	0.180935	98	0.0745981	0.633784	0.540553	0.00965917	0.189775	0.0700061	0.645343	0.23667	0.025549	0.5891
PLA2G2E	0.184747	94	0.074651	0.633784	0.540553	0.0148437	0.146796	0.17485	0.758445	0.239358	0.0273646	0.591925
CA2	0.17467	105	0.0747276	0.633784	0.540553	0.00804784	0.158877	0.118156	0.709199	0.202492	0.0478654	0.659866
TCRBV6S1A1N1	0.193164	86	0.0747597	0.633784	0.540553	0.0074285	0.191081	0.0874909	0.672407	0.201087	0.0775039	0.717707
KCNQ5	0.183629	95	0.0748668	0.633784	0.540553	0.0124867	0.218946	0.0416057	0.583435	0.154561	0.152889	0.795788
MSMP	0.19902	81	0.0748793	0.633784	0.540553	0.0139211	0.196038	0.0875043	0.672407	0.144536	0.222457	0.835785
GCK	0.191955	87	0.0748895	0.633784	0.540553	0.0108352	0.210505	0.0576609	0.62278	0.20114	0.0794128	0.723352
EPSTI1	0.171219	109	0.075053	0.6346	0.54125	0.00958085	0.166685	0.0974167	0.685805	0.218576	0.031484	0.609957
CCDC85A	0.179692	99	0.0751207	0.634845	0.541459	0.0154079	0.215417	0.0402982	0.578723	0.207426	0.049797	0.667062
KRT37	0.172764	107	0.0751575	0.634845	0.541459	0.0209045	0.155672	0.118199	0.709234	0.229579	0.0252196	0.585191
CELA1	0.178684	100	0.0752858	0.635151	0.541719	0.0115993	0.174058	0.0989268	0.688931	0.282213	0.00642014	0.46893
GPN2	0.207806	74	0.0756295	0.636067	0.542501	0.0164832	0.223473	0.0649196	0.645343	0.0657826	0.596879	0.944627
MTMR8	0.243776	54	0.0756715	0.636138	0.542561	0.0188056	0.24376	0.102576	0.691155	0.232148	0.108472	0.755949
ZNF766	0.253405	50	0.0757933	0.6365	0.54287	0.0058972	0.239655	0.100877	0.689008	0.306026	0.0433556	0.647159
PRPF3	0.291441	38	0.075846	0.6365	0.54287	0.0993948	0.279115	0.0943374	0.682423	0.301675	0.0829333	0.730309
MCM4	0.176553	102	0.0758826	0.6365	0.54287	0.0138986	0.205535	0.0456973	0.59035	0.197492	0.0591588	0.690984
SLC2A7	0.182961	95	0.0759488	0.636773	0.543103	0.00782702	0.194605	0.0692377	0.645343	0.250269	0.0201225	0.557005
PLA2G12A	0.207478	74	0.0761017	0.637223	0.543487	0.0118318	0.19103	0.110531	0.697442	0.160885	0.183351	0.8164
PPM1L	0.340559	28	0.0761707	0.637223	0.543487	0.0393922	0.343085	0.0797759	0.657198	0.238304	0.241061	0.843849
GGCT	0.182791	95	0.0762272	0.637415	0.54365	0.00857115	0.197846	0.063097	0.636382	0.156879	0.14675	0.794131
OR5K4	0.207107	74	0.0766406	0.638547	0.544616	0.0182458	0.201988	0.0911756	0.678922	0.220568	0.0751321	0.715102
SLC22A5	0.172675	106	0.0767196	0.638547	0.544616	0.00668212	0.178936	0.0763765	0.654263	0.172842	0.0904564	0.739137
FOXJ2	0.179507	98	0.0769566	0.638857	0.544881	0.00620225	0.183843	0.0745229	0.649536	0.190639	0.0752172	0.715102
ATG4C	0.182325	95	0.0769915	0.638857	0.544881	0.0103576	0.162837	0.131822	0.72397	0.106633	0.331386	0.879168
SF3A2	0.217517	67	0.07703	0.638857	0.544881	0.0129725	0.219734	0.081052	0.660716	0.21627	0.0913533	0.739497
B3GALNT1	0.193971	84	0.0770661	0.638857	0.544881	0.0123308	0.137948	0.228427	0.792747	0.164581	0.152619	0.795788
GJB4	0.174988	103	0.0770735	0.638857	0.544881	0.00810725	0.227575	0.0249744	0.529794	0.177171	0.0893308	0.738904
COLEC12	0.176727	101	0.0770744	0.638857	0.544881	0.014146	0.16352	0.111405	0.699168	0.196655	0.060265	0.692403
MYL2	0.231777	59	0.0773349	0.638943	0.544954	0.0211696	0.226258	0.0905714	0.678515	0.362122	0.00659245	0.46893
PHYHD1	0.177401	100	0.077439	0.639361	0.545311	0.0109307	0.179984	0.0842826	0.667038	0.256448	0.0141385	0.521203
LOC284933	0.282375	40	0.0774982	0.639571	0.545489	0.00503937	0.238036	0.168517	0.754702	0.295151	0.090147	0.739137
OR52N4	0.187954	89	0.0777575	0.639811	0.545695	0.0114063	0.209458	0.0573739	0.62278	0.223918	0.0458582	0.655592
OR52E8	0.197112	81	0.0777687	0.639811	0.545695	0.0100399	0.195884	0.0856581	0.670079	0.246704	0.034093	0.621908
PVALB	0.209165	72	0.0778463	0.639811	0.545695	0.0129578	0.207142	0.0876751	0.672407	0.248788	0.0423429	0.647159
TMEM198	0.218555	66	0.0778989	0.639811	0.545695	0.0171587	0.205846	0.102714	0.691155	0.153057	0.242997	0.844233
GPR4	0.198239	80	0.0779443	0.639907	0.545776	0.0142641	0.18988	0.0958959	0.685122	0.148769	0.212322	0.830208
LPIN2	0.171847	106	0.0781671	0.640446	0.546236	0.00751637	0.177703	0.0769282	0.654263	0.206804	0.0432151	0.647159
KMT2E	0.175209	102	0.078177	0.640446	0.546236	0.00705722	0.16506	0.111873	0.699427	0.162934	0.118648	0.764424
OR4D2	0.172544	105	0.0783893	0.640446	0.546236	0.010275	0.186733	0.069997	0.645343	0.22384	0.0300997	0.600909
FAM126A	0.184439	92	0.0784042	0.640446	0.546236	0.0138525	0.196529	0.0697396	0.645343	0.168797	0.120274	0.766513
RASA4	0.195427	82	0.0784914	0.640446	0.546236	0.00864179	0.204965	0.0718391	0.646512	0.24462	0.034418	0.623318
KRT36	0.165468	114	0.0785107	0.640446	0.546236	0.0113295	0.198062	0.0418308	0.583852	0.220878	0.0242465	0.580004
LSG1	0.168428	110	0.0785945	0.640446	0.546236	0.00683843	0.171208	0.0885383	0.67317	0.171548	0.0912207	0.739137
TSSK3	0.211617	70	0.0786438	0.640446	0.546236	0.0157201	0.253071	0.0419544	0.583999	0.190463	0.128581	0.778229
FLOT2	0.230765	59	0.0786735	0.640446	0.546236	0.0248074	0.317703	0.0170314	0.486735	0.146531	0.290372	0.869247
ANXA8L2	0.205637	74	0.0788028	0.640446	0.546236	0.0192827	0.196189	0.106171	0.693969	0.301045	0.0140397	0.521066
DNAJB5	0.207045	73	0.0788226	0.640446	0.546236	0.0155953	0.218408	0.0735634	0.647862	0.183425	0.137336	0.78666
KIAA1024L	0.176547	100	0.0788998	0.640446	0.546236	0.00546736	0.178803	0.0881308	0.67317	0.0883474	0.40498	0.905013
CDH6	0.188303	88	0.0789296	0.640446	0.546236	0.0178775	0.197231	0.0739033	0.648069	0.121566	0.285862	0.867093
OR5B3	0.182075	94	0.0790244	0.640446	0.546236	0.0215255	0.225241	0.0338181	0.562971	0.192648	0.0755532	0.715102
KIAA0930	0.189094	87	0.0794123	0.641299	0.546963	0.0168128	0.178499	0.113157	0.702474	0.222181	0.0462019	0.658021
RXRB	0.220864	64	0.079462	0.641299	0.546963	0.0171735	0.20405	0.117861	0.70883	0.238201	0.0717643	0.706425
CLIP2	0.173606	103	0.0794739	0.641299	0.546963	0.0112719	0.190511	0.0644193	0.643197	0.169513	0.104292	0.753807
OR4P4	0.214108	68	0.0795609	0.641299	0.546963	0.0126458	0.215386	0.0874043	0.672407	0.0690651	0.596883	0.944627
TUFM	0.180718	95	0.079677	0.641299	0.546963	0.00966657	0.189654	0.0767648	0.654263	0.148255	0.170556	0.807123
KRTAP4-2	0.199601	78	0.0797662	0.641299	0.546963	0.0153961	0.199673	0.0926439	0.681633	0.209569	0.0751633	0.715102
VARS	0.170886	106	0.0798721	0.641299	0.546963	0.0111847	0.196825	0.0485202	0.597827	0.160265	0.120797	0.767008
TPH2	0.18057	95	0.0799274	0.641299	0.546963	0.0138424	0.19505	0.0669934	0.645343	0.14348	0.190189	0.819333
OR2H2	0.194502	82	0.0799426	0.641299	0.546963	0.0168639	0.228495	0.0442057	0.589881	0.144901	0.218031	0.834381
ARMC1	0.240384	54	0.0799639	0.641299	0.546963	0.0208914	0.290884	0.0383734	0.575176	0.209876	0.139361	0.787477
HIST1H2AA	0.217027	66	0.0800535	0.641488	0.547125	0.00954893	0.216228	0.0941852	0.682184	0.204791	0.113373	0.758895
AP2B1	0.283704	39	0.0800756	0.641488	0.547125	0.0318309	0.342664	0.0472733	0.59344	0.236844	0.170723	0.807123
TAGLN3	0.313838	32	0.0802563	0.641488	0.547125	0.0415198	0.303588	0.0968557	0.685805	0.220363	0.233566	0.842237
LZTS1	0.176627	99	0.080312	0.641488	0.547125	0.00681409	0.177079	0.0877493	0.672407	0.181685	0.084784	0.732782
VIM	0.208755	71	0.0806235	0.641488	0.547125	0.0167562	0.213047	0.0834558	0.664662	0.183508	0.143403	0.789365
ISOC1	0.242153	53	0.0806426	0.641488	0.547125	0.0200305	0.252431	0.0710089	0.645343	0.167107	0.251116	0.850289
TMTC2	0.180118	95	0.0806988	0.641488	0.547125	0.00783708	0.172587	0.105807	0.693969	0.0969834	0.374367	0.895496
CACNA1G	0.169572	107	0.0807886	0.641488	0.547125	0.0104628	0.187351	0.063322	0.637633	0.161036	0.113175	0.758895
FRA10AC1	0.188133	87	0.0809801	0.641488	0.547125	0.0110929	0.187327	0.0940128	0.682112	0.175613	0.119199	0.76456
TNC	0.161987	117	0.0810034	0.641488	0.547125	0.00818132	0.168897	0.0820205	0.664003	0.239527	0.0134001	0.514478
MAP3K12	0.184908	90	0.0810291	0.641488	0.547125	0.00959542	0.187366	0.0822493	0.664003	0.172985	0.124915	0.772679
SYT3	0.198712	78	0.0811444	0.641851	0.547434	0.0243522	0.197577	0.0938317	0.682112	0.209045	0.0824315	0.730119
NEUROD6	0.27182	42	0.0816151	0.644284	0.549509	0.0341673	0.317007	0.0462516	0.590582	0.193147	0.252056	0.851484
NKPD1	0.183495	91	0.0816751	0.644284	0.549509	0.0132075	0.198705	0.0699884	0.645343	0.207724	0.0611199	0.692563
GRB2	0.480767	14	0.0818189	0.644506	0.549699	0.00959203	0.4824	0.0806373	0.659415	0.503257	0.0795781	0.724509
BSX	0.202253	75	0.0818281	0.644506	0.549699	0.0101073	0.230604	0.0547819	0.615475	0.190068	0.117753	0.764084
FGF18	0.312259	32	0.081871	0.644506	0.549699	0.0341618	0.356096	0.0492788	0.60003	0.240728	0.208415	0.826745
PFDN1	0.32278	30	0.0819074	0.644506	0.549699	0.0306509	0.3412	0.07008	0.645343	0.269469	0.165535	0.804538
SLC10A4	0.180253	94	0.0821212	0.645652	0.550676	0.0104893	0.210862	0.0513182	0.604922	0.10342	0.352159	0.886727
PC	0.177342	97	0.0822509	0.646136	0.551088	0.00990727	0.185858	0.0760961	0.654263	0.273383	0.010405	0.484027
ENO3	0.210613	69	0.0823753	0.646309	0.551236	0.00997604	0.218329	0.0830634	0.664497	0.150478	0.239122	0.843353
CXXC1	0.199161	77	0.0824775	0.646539	0.551433	0.0143266	0.217546	0.0683893	0.645343	0.169542	0.154514	0.796725
SLIT3	0.165535	111	0.0825142	0.646539	0.551433	0.0141082	0.179112	0.0731065	0.647513	0.0897332	0.377086	0.896331
SNTB2	0.212009	68	0.0826257	0.646539	0.551433	0.030466	0.222944	0.0742461	0.648069	0.195377	0.141626	0.789172
PTPLB	0.220329	63	0.0827088	0.646539	0.551433	0.024988	0.208403	0.11006	0.697304	0.22801	0.0910029	0.739137
BEND6	0.191596	83	0.082712	0.646539	0.551433	0.0144033	0.179538	0.111038	0.698222	0.213126	0.0663752	0.698215
ZNF324B	0.192747	82	0.0827562	0.646618	0.5515	0.0257209	0.207897	0.0677797	0.645343	0.209189	0.0716734	0.706425
CAPRIN1	0.194923	80	0.0831541	0.648661	0.553243	0.0160515	0.188931	0.106934	0.693969	0.215185	0.0655904	0.695779
RAB31	0.216386	65	0.0834013	0.648661	0.553243	0.0176722	0.243886	0.0582094	0.623335	0.254599	0.0516583	0.674221
GPR155	0.16812	107	0.0834575	0.648661	0.553243	0.0100508	0.181492	0.0707407	0.645343	0.218018	0.0319312	0.614956
LOC440061	0.288372	37	0.0834736	0.648661	0.553243	0.0195687	0.335746	0.0522266	0.608807	0.107309	0.533328	0.935645
ZNF480	0.249749	49	0.0835134	0.648661	0.553243	0.00508953	0.245568	0.0961556	0.685724	0.231501	0.130528	0.778229
KRT79	0.168888	106	0.0835149	0.648661	0.553243	0.00613992	0.174308	0.0828341	0.664497	0.208066	0.0408467	0.642474
TRPV3	0.167292	108	0.0835336	0.648661	0.553243	0.00775157	0.20089	0.0461718	0.590582	0.186944	0.0639094	0.695461
OR5B12	0.171318	103	0.0835797	0.648661	0.553243	0.00894384	0.160047	0.117359	0.708706	0.151178	0.152589	0.795788
SCNN1G	0.167257	108	0.0835999	0.648661	0.553243	0.00418718	0.156345	0.120337	0.711241	0.17445	0.0874532	0.737334
ITGAM	0.167822	107	0.0840148	0.649765	0.554184	0.00714895	0.190475	0.0616515	0.633309	0.237321	0.0192538	0.555365
ELOVL4	0.186281	87	0.0840711	0.649803	0.554216	0.00880966	0.195264	0.0826068	0.664047	0.222468	0.0502691	0.670375
PDCD6IP	0.177127	96	0.0842702	0.649803	0.554216	0.0127462	0.184674	0.0814204	0.662385	0.209549	0.0514204	0.674221
C12orf66	0.206309	71	0.0843185	0.649803	0.554216	0.0173164	0.219579	0.0742024	0.648069	0.181614	0.14765	0.794568
CACUL1	0.207724	70	0.0844332	0.649803	0.554216	0.0262222	0.217437	0.0843604	0.667375	0.165735	0.190596	0.819333
LRRC57	0.203314	73	0.0844917	0.649989	0.554375	0.0156535	0.217317	0.0707418	0.645343	0.107179	0.387985	0.900033
CEP85L	0.167517	107	0.084587	0.650212	0.554565	0.00734559	0.192326	0.0552363	0.617283	0.193625	0.0587298	0.690984
RNF7	0.304786	33	0.0845893	0.650212	0.554565	0.0184648	0.303232	0.0915883	0.679387	0.27766	0.130449	0.778229
CDK8	0.31998	30	0.0847472	0.651161	0.555375	0.0389355	0.309911	0.101823	0.690366	0.298804	0.130028	0.778229
AK3	0.188989	84	0.085121	0.652445	0.55647	0.0113978	0.218976	0.0509959	0.603754	0.0484046	0.675913	0.960763
VSTM2L	0.236368	54	0.0852913	0.653116	0.557042	0.0281836	0.211733	0.139916	0.731871	0.180125	0.215536	0.832907
ALDOC	0.20716	70	0.0852991	0.653116	0.557042	0.0158582	0.229541	0.0616852	0.633309	0.239281	0.0548956	0.68592
RAB34	0.18655	86	0.0854664	0.653116	0.557042	0.0133734	0.185204	0.0936918	0.682112	0.11839	0.301908	0.87308
PKP4	0.182204	90	0.0856508	0.653116	0.557042	0.0115525	0.180707	0.0999768	0.688931	0.079306	0.476045	0.921515
KLHDC8B	0.197067	77	0.0858218	0.65326	0.557165	0.0122985	0.195132	0.100466	0.689008	0.175669	0.148791	0.794589
WDR45	0.282321	38	0.085917	0.65326	0.557165	0.0407931	0.302299	0.0689858	0.645343	0.256446	0.137001	0.78666
GJC2	0.200995	74	0.0859492	0.65326	0.557165	0.00558266	0.212144	0.0848029	0.669154	0.200979	0.0952554	0.74523
BOK-AS1	0.282137	38	0.0861307	0.65326	0.557165	0.0124624	0.2581	0.14054	0.731932	0.288576	0.0978924	0.74795
ANO8	0.179838	92	0.0862757	0.65326	0.557165	0.0146009	0.207898	0.0547569	0.615475	0.112042	0.313238	0.875323
DGAT2	0.18715	85	0.0863311	0.65326	0.557165	0.00810393	0.177975	0.109667	0.696692	0.152798	0.190622	0.819333
NDRG2	0.199289	75	0.0865027	0.654113	0.557893	0.00959881	0.193576	0.10326	0.691768	0.267375	0.02635	0.591925
SLC40A1	0.173999	98	0.0866218	0.654113	0.557893	0.00929518	0.183611	0.0797761	0.657198	0.2621	0.0136309	0.516686
OR4A15	0.207802	69	0.0866469	0.654113	0.557893	0.0133359	0.217058	0.0824237	0.664003	0.191287	0.139738	0.787477
RERGL	0.192741	80	0.0867324	0.654113	0.557893	0.0134819	0.213341	0.0679924	0.645343	0.172694	0.144006	0.789387
EPB41	0.167941	105	0.0868109	0.654113	0.557893	0.0109618	0.156638	0.123495	0.71495	0.170018	0.0995151	0.749265
OLIG2	0.261152	44	0.0868464	0.654113	0.557893	0.0178563	0.272066	0.0894438	0.67516	0.233527	0.13664	0.786657
OR9Q2	0.167113	106	0.0868603	0.654113	0.557893	0.00541846	0.174674	0.0887296	0.673426	0.13195	0.204891	0.826745
SLC22A8	0.167898	105	0.0868928	0.654113	0.557893	0.0054531	0.147446	0.147381	0.742545	0.208513	0.0437175	0.647159
SLC6A9	0.177356	94	0.0872467	0.655419	0.559007	0.011434	0.210643	0.0475468	0.593854	0.145609	0.183628	0.8164
CACNA1D	0.170167	102	0.0872813	0.655419	0.559007	0.0160597	0.17313	0.0951724	0.684602	0.119779	0.255424	0.852795
HPRT1	0.24683	49	0.0873085	0.655419	0.559007	0.0170972	0.249092	0.0877671	0.672407	0.242119	0.109062	0.756998
DEFB104B	0.239187	52	0.0876809	0.656653	0.560059	0.0121927	0.301004	0.0397861	0.577995	0.151765	0.287727	0.868364
STAC2	0.178796	92	0.0881427	0.657952	0.561166	0.0103811	0.184448	0.0853731	0.669898	0.215034	0.0494915	0.66627
MIOS	0.194354	78	0.0881809	0.657952	0.561166	0.0199965	0.207758	0.0799123	0.657748	0.205934	0.0872045	0.736878
PSMB4	0.187183	84	0.0882016	0.657952	0.561166	0.014041	0.183047	0.10191	0.690366	0.1858	0.110494	0.758895
FGF7	0.227797	57	0.0883412	0.658227	0.561401	0.0191414	0.216331	0.119745	0.710998	0.190819	0.175399	0.809304
FGF13	0.371661	22	0.0885459	0.658962	0.562028	0.0275098	0.368719	0.100018	0.688931	0.410282	0.0647003	0.695461
ASS1	0.190333	81	0.088762	0.659793	0.562737	0.0139573	0.209333	0.0676776	0.645343	0.21074	0.075584	0.715102
TUSC2	0.245529	49	0.0890417	0.660058	0.562963	0.0151392	0.261468	0.0726332	0.647513	0.181007	0.245402	0.845769
FABP6	0.175325	95	0.0892391	0.660728	0.563535	0.00752049	0.170715	0.109704	0.696692	0.204475	0.060499	0.692403
DEFB110	0.206132	69	0.0892666	0.660728	0.563535	0.014246	0.22634	0.0721057	0.646881	0.272253	0.0308795	0.603667
MGP	0.183208	87	0.0894048	0.661122	0.563871	0.0085323	0.212009	0.057422	0.62278	0.211317	0.0615593	0.692563
AP2A1	0.198782	74	0.0895332	0.661122	0.563871	0.0172714	0.20004	0.0993522	0.688931	0.185895	0.126186	0.77452
RELL1	0.171518	99	0.0896002	0.661122	0.563871	0.00730533	0.164363	0.117436	0.708706	0.217504	0.0394651	0.637912
BPGM	0.186371	84	0.0896159	0.661122	0.563871	0.00888276	0.178133	0.109348	0.696692	0.202847	0.0768429	0.7172
ZNF563	0.255988	45	0.089639	0.661122	0.563871	0.0255961	0.26289	0.0967913	0.685805	0.232453	0.143601	0.789365
SYDE2	0.161792	111	0.0897945	0.662011	0.564629	0.011786	0.143434	0.14834	0.743103	0.0846663	0.399895	0.902303
SLCO4C1	0.162463	110	0.0899338	0.662513	0.565056	0.00495683	0.163684	0.101927	0.690366	0.134597	0.186377	0.816609
RCAN1	0.217179	62	0.0899674	0.662513	0.565056	0.0200145	0.253915	0.0544404	0.615475	0.0773747	0.570843	0.939803
FUS	0.187177	83	0.0901874	0.662844	0.565339	0.0131191	0.239744	0.0357232	0.570443	0.187091	0.100967	0.749452
RASA1	0.179519	90	0.0904474	0.663689	0.566059	0.00997464	0.170636	0.120692	0.712667	0.126951	0.255728	0.852795
CMPK1	0.192937	78	0.0905682	0.663689	0.566059	0.0208901	0.218458	0.0614968	0.633309	0.123193	0.309619	0.875323
ATP13A5	0.160662	112	0.0906037	0.663689	0.566059	0.0107318	0.186153	0.0584872	0.623787	0.181705	0.0675857	0.700188
OR2C1	0.188046	82	0.0906811	0.663689	0.566059	0.015579	0.157775	0.173452	0.758445	0.251977	0.03274	0.616049
C5orf46	0.186727	83	0.0909779	0.664167	0.566467	0.0072253	0.198798	0.0830495	0.664497	0.229961	0.0471717	0.659239
POR	0.169847	100	0.0911409	0.664167	0.566467	0.00718965	0.177352	0.0872538	0.672407	0.173619	0.105725	0.753807
ANKRA2	0.221917	59	0.0911738	0.664167	0.566467	0.0149955	0.213725	0.110412	0.697442	0.197635	0.16448	0.802878
LINGO4	0.166387	104	0.0913926	0.664167	0.566467	0.0118911	0.170393	0.0969547	0.685805	0.140336	0.177307	0.810058
NUDT16L1	0.266868	41	0.0916629	0.664167	0.566467	0.0392193	0.280749	0.083408	0.664566	0.236846	0.146577	0.794049
SATB2	0.223392	58	0.0918646	0.664167	0.566467	0.0194491	0.249313	0.0664185	0.645343	0.20456	0.13787	0.78666
TMEM246	0.204405	69	0.0920393	0.664167	0.566467	0.0162864	0.217304	0.07966	0.657198	0.178431	0.161769	0.801396
CD47	0.167654	102	0.0921244	0.664167	0.566467	0.00848293	0.158794	0.11835	0.709238	0.143968	0.173359	0.808212
OLFML3	0.180603	88	0.0922082	0.664167	0.566467	0.0204248	0.180715	0.102067	0.690576	0.216439	0.0538119	0.683133
HSPA12A	0.179567	89	0.0922212	0.664167	0.566467	0.0089671	0.171488	0.121107	0.713316	0.19748	0.0791132	0.723352
TCRBV21S1	0.188277	81	0.092328	0.664167	0.566467	0.0110083	0.182896	0.108986	0.69634	0.202212	0.0884854	0.738904
ERLEC1	0.193139	77	0.0923838	0.664167	0.566467	0.0112263	0.197311	0.0919798	0.679387	0.159386	0.184286	0.8164
FUT8	0.18823	81	0.0924112	0.664167	0.566467	0.0268156	0.19963	0.0817431	0.663584	0.0589131	0.618065	0.949565
KCNS1	0.174512	94	0.0925192	0.664167	0.566467	0.0114174	0.154187	0.158857	0.74902	0.209424	0.055889	0.686643
ZAP70	0.162556	108	0.0927871	0.664167	0.566467	0.0107112	0.218407	0.0290332	0.542811	0.18095	0.0745739	0.715102
SS18	0.200999	71	0.0928044	0.664167	0.566467	0.0154527	0.19583	0.112243	0.700468	0.224089	0.0727322	0.709315
OR2D3	0.171609	97	0.0928148	0.664167	0.566467	0.0138911	0.168727	0.105933	0.693969	0.182998	0.0897787	0.738904
ACACA	0.184557	84	0.0928372	0.664167	0.566467	0.0121358	0.172311	0.123994	0.715739	0.223907	0.0551417	0.68628
KRTAP3-2	0.178213	90	0.0928548	0.664167	0.566467	0.00996854	0.12341	0.266345	0.815185	0.20966	0.0571286	0.687068
EME2	0.173339	95	0.0929814	0.664379	0.566649	0.0120108	0.170773	0.115931	0.706397	0.207982	0.0561263	0.686643
POLR2K	0.449221	15	0.0929921	0.664379	0.566649	0.0450513	0.453586	0.089474	0.67516	0.29273	0.33175	0.879168
MFF	0.189044	80	0.0930687	0.664676	0.566902	0.00933559	0.178752	0.127558	0.717765	0.137507	0.246007	0.846041
PPP1R9A	0.163711	106	0.0935708	0.66571	0.567783	0.00723756	0.165282	0.10386	0.693275	0.185965	0.0711771	0.706344
PCDHGC5	0.168487	100	0.0937992	0.66571	0.567783	0.0151406	0.148209	0.156252	0.74902	0.172117	0.106776	0.753807
OR3A2	0.176685	91	0.0938605	0.66571	0.567783	0.00902677	0.198113	0.0725953	0.647513	0.171714	0.120609	0.766587
VPS25	0.306181	31	0.0938957	0.66571	0.567783	0.0246708	0.316962	0.0823232	0.664003	0.291974	0.110984	0.758895
CAPN6	0.18622	82	0.0939164	0.66571	0.567783	0.0155899	0.199438	0.0820426	0.664003	0.146295	0.207298	0.826745
ZBTB14	0.255437	44	0.0942312	0.666061	0.568083	0.0328873	0.26415	0.090952	0.678922	0.287071	0.0619745	0.692563
LRRC16B	0.163367	106	0.0942715	0.666061	0.568083	0.00903109	0.172668	0.0907854	0.678922	0.182171	0.0772457	0.717422
ZIK1	0.197312	73	0.0942824	0.666061	0.568083	0.00469891	0.173039	0.161419	0.750497	0.203762	0.0981531	0.74795
DHRS4	0.177375	90	0.0944264	0.666162	0.568169	0.0151886	0.183206	0.0913257	0.679037	0.185382	0.0954314	0.745373
RQCD1	0.394726	19	0.0944304	0.666162	0.568169	0.00988829	0.401948	0.109743	0.696692	0.284639	0.25229	0.851525
TTC39A	0.168989	99	0.0945024	0.666162	0.568169	0.01007	0.161833	0.125382	0.71734	0.13001	0.219338	0.83531
MARK4	0.189416	79	0.094543	0.666162	0.568169	0.00949487	0.177629	0.124758	0.716566	0.106681	0.375895	0.895545
HIST3H3	0.258071	43	0.0947506	0.667128	0.568993	0.0126806	0.232903	0.159372	0.74902	0.16915	0.290405	0.869247
USP24	0.190488	78	0.0948177	0.667253	0.5691	0.0139593	0.232082	0.0481829	0.596927	0.139228	0.246872	0.846291
CIRBP	0.282558	36	0.0949712	0.667764	0.569535	0.0443302	0.27054	0.121738	0.71388	0.247992	0.157319	0.79713
ZBED6	0.16693	101	0.0952224	0.667969	0.56971	0.0217758	0.187317	0.0721868	0.646881	0.13232	0.208625	0.826745
SGCD	0.212018	63	0.0952826	0.667969	0.56971	0.0241609	0.21511	0.095941	0.685122	0.28037	0.0346502	0.624205
ARL14EP	0.229331	54	0.0952931	0.667969	0.56971	0.0217018	0.228852	0.102701	0.691155	0.222304	0.120745	0.766933
EXT1	0.215488	61	0.0953443	0.668081	0.569805	0.0195233	0.228576	0.0872284	0.672407	0.268537	0.0434083	0.647159
IMP4	0.195278	74	0.0954459	0.668302	0.569994	0.0114752	0.186679	0.121771	0.71388	0.330109	0.00636921	0.46893
SLC4A8	0.173927	93	0.0954465	0.668302	0.569994	0.00681235	0.166338	0.117138	0.708495	0.226665	0.0381386	0.631493
OGFR	0.197943	72	0.095565	0.668822	0.570438	0.00688768	0.193183	0.123114	0.714645	0.207238	0.0949949	0.74523
NAAA	0.166727	101	0.0956308	0.668822	0.570438	0.0101175	0.151272	0.147776	0.743062	0.228826	0.0291298	0.600274
ZNF232	0.218987	59	0.0956395	0.668822	0.570438	0.0166679	0.200373	0.154367	0.748766	0.195155	0.142087	0.789172
TMEM82	0.164259	104	0.0956709	0.668822	0.570438	0.00575834	0.156709	0.125303	0.71734	0.170869	0.09964	0.749265
TOP1	0.187518	80	0.0957878	0.668961	0.570556	0.0115307	0.183251	0.115557	0.706397	0.220254	0.063011	0.694934
SKIDA1	0.178627	88	0.0958861	0.669155	0.570722	0.0107486	0.201956	0.068834	0.645343	0.0396564	0.730307	0.963955
NDUFS7	0.178627	88	0.0958864	0.669155	0.570722	0.0102593	0.177471	0.106305	0.693969	0.205794	0.0688334	0.702991
SLC4A9	0.158726	111	0.0961279	0.670347	0.571739	0.00895951	0.192009	0.0497333	0.601767	0.192329	0.0552323	0.686643
PTPN4	0.175414	91	0.0962856	0.670539	0.571902	0.0106736	0.21833	0.0460228	0.590582	0.276878	0.0112779	0.488854
ALDH1A2	0.226519	55	0.0963082	0.670539	0.571902	0.0212232	0.239491	0.0905246	0.678515	0.16796	0.243646	0.844233
VPS37C	0.171607	95	0.0963457	0.670539	0.571902	0.0134725	0.169106	0.113143	0.702474	0.259951	0.0162789	0.535872
PAH	0.171581	95	0.0963961	0.670539	0.571902	0.0130674	0.1734	0.104149	0.693535	0.147075	0.179206	0.812849
BHLHB9	0.168769	98	0.0966671	0.67065	0.571997	0.0273227	0.1553	0.146163	0.739846	0.156105	0.148778	0.794589
GRIN3A	0.162937	105	0.0967668	0.671096	0.572377	0.00796806	0.221142	0.0286497	0.542811	0.204372	0.0481705	0.660619
WIPF1	0.17045	96	0.0968431	0.671134	0.57241	0.0103184	0.162912	0.131642	0.72397	0.157831	0.146681	0.794131
PAPL	0.165253	102	0.0969481	0.671152	0.572425	0.00821031	0.197644	0.0575626	0.62278	0.109484	0.301564	0.87308
CHSY3	0.172185	94	0.09702	0.671152	0.572425	0.0170933	0.203725	0.058406	0.623335	0.111184	0.313994	0.875323
BTAF1	0.178961	87	0.0972148	0.671498	0.57272	0.018649	0.181302	0.105274	0.693969	0.10896	0.339136	0.880779
PUSL1	0.172024	94	0.0973363	0.671937	0.573095	0.0165527	0.180313	0.0946722	0.683251	0.198124	0.0658372	0.696012
LEFTY1	0.17583	90	0.0973791	0.671937	0.573095	0.0106317	0.166944	0.133853	0.727463	0.204848	0.066582	0.698215
ATXN7L3	0.25305	44	0.0974557	0.671937	0.573095	0.0236985	0.315581	0.0472965	0.59344	0.18885	0.256159	0.852795
LYG2	0.164937	102	0.0975956	0.672412	0.5735	0.00793025	0.21224	0.0389358	0.57766	0.162384	0.121978	0.768984
SOCS1	0.215811	60	0.097706	0.672803	0.573833	0.019433	0.274509	0.0406169	0.578723	0.129084	0.35223	0.886727
RHAG	0.158697	110	0.097737	0.672803	0.573833	0.0103522	0.15119	0.131244	0.72397	0.184062	0.0696358	0.702991
ARMC8	0.241776	48	0.0978061	0.672884	0.573902	0.0232542	0.239838	0.104424	0.693535	0.278443	0.0706043	0.705595
RELN	0.16319	104	0.0978809	0.673153	0.574132	0.00875452	0.159327	0.12101	0.713306	0.118915	0.251062	0.850259
ANGEL1	0.159328	109	0.0979568	0.67317	0.574146	0.0120466	0.167909	0.0949476	0.68439	0.169481	0.0969985	0.747766
SRGAP2	0.179387	86	0.0984012	0.674004	0.574857	0.0117257	0.177765	0.112356	0.700594	0.21348	0.0588856	0.690984
EIF3F	0.186083	80	0.0984019	0.674004	0.574857	0.015257	0.208466	0.0707378	0.645343	0.0961942	0.418183	0.91044
OR2Y1	0.21527	60	0.0985699	0.674707	0.575457	0.0099964	0.212447	0.106219	0.693969	0.232351	0.0819927	0.728618
SLC22A18AS	0.279604	36	0.0986271	0.674855	0.575583	0.00825613	0.261108	0.16341	0.750851	0.290087	0.10728	0.753807
ATP13A1	0.163515	103	0.0988673	0.675552	0.576178	0.0114951	0.195301	0.0552301	0.617283	0.0959697	0.362809	0.890809
FHOD1	0.156034	113	0.0988717	0.675552	0.576178	0.00518489	0.161089	0.0974005	0.685805	0.182203	0.0668244	0.698215
PODN	0.165008	101	0.0991501	0.675991	0.576552	0.00988252	0.163314	0.113797	0.703975	0.192372	0.0677229	0.700188
EIF4EBP3	0.207939	64	0.0991881	0.676007	0.576566	0.0140176	0.220517	0.0904372	0.678495	0.138608	0.290887	0.869293
OR6A2	0.171073	94	0.0992296	0.676046	0.576599	0.0151491	0.166973	0.124393	0.715769	0.235928	0.0287524	0.599367
ALG5	0.173771	91	0.0994936	0.676155	0.576692	0.0116098	0.166102	0.13103	0.72397	0.123793	0.270871	0.860462
KLK5	0.164827	101	0.0995263	0.676155	0.576692	0.00682633	0.167082	0.105586	0.693969	0.212797	0.0440439	0.647254
DKK3	0.166461	99	0.0996119	0.676155	0.576692	0.00742045	0.165086	0.111816	0.699427	0.132658	0.21524	0.83257
OR5AS1	0.177671	87	0.0996901	0.676155	0.576692	0.0145162	0.17136	0.121389	0.713316	0.162658	0.149422	0.794589
EPB41L3	0.157791	110	0.0996914	0.676155	0.576692	0.00984411	0.154797	0.11846	0.709446	0.160496	0.112526	0.758895
CACNA2D3	0.175627	89	0.0997096	0.676155	0.576692	0.0106174	0.178688	0.10389	0.693275	0.154682	0.170687	0.807123
ESRP2	0.167067	98	0.100127	0.677289	0.577659	0.0106659	0.166004	0.107887	0.69555	0.120673	0.262745	0.857346
CASP16	0.164439	101	0.100335	0.677736	0.57804	0.0115985	0.191086	0.0665372	0.645343	0.202622	0.0514335	0.674221
EMX2	0.411989	17	0.100336	0.677736	0.57804	0.0287958	0.341432	0.195576	0.771825	0.306382	0.26672	0.859023
TTC38	0.160352	106	0.100591	0.677869	0.578154	0.00765613	0.159037	0.11778	0.70883	0.167894	0.100214	0.74945
OR2AP1	0.187175	78	0.100811	0.677869	0.578154	0.0154124	0.17208	0.145459	0.739846	0.313397	0.00981146	0.484027
PLK3	0.16929	95	0.100995	0.677869	0.578154	0.0134744	0.179384	0.0964129	0.685805	0.209722	0.0512235	0.674221
PYGL	0.168372	96	0.101042	0.677869	0.578154	0.011771	0.167069	0.117616	0.70883	0.186335	0.085835	0.734819
VAMP8	0.213694	60	0.101121	0.677869	0.578154	0.0390382	0.257313	0.0555569	0.617948	0.251328	0.0641808	0.695461
SLC6A20	0.15859	108	0.101144	0.677869	0.578154	0.00810148	0.166669	0.0991819	0.688931	0.132522	0.198053	0.824397
KLHL9	0.234514	50	0.101157	0.677869	0.578154	0.0272266	0.253164	0.0859852	0.670079	0.257493	0.0877039	0.738098
ALB	0.155559	112	0.101463	0.677869	0.578154	0.00602788	0.154298	0.121521	0.713316	0.178144	0.0761868	0.715224
KRT23	0.157701	109	0.101477	0.677869	0.578154	0.0104003	0.110875	0.264866	0.81348	0.180556	0.0737086	0.713737
CSMD2	0.157686	109	0.101511	0.677869	0.578154	0.0110817	0.201673	0.0431359	0.589821	0.12542	0.216104	0.832907
AKAP8L	0.1655	99	0.101609	0.677869	0.578154	0.0114054	0.200805	0.0563181	0.619925	0.163528	0.121421	0.767777
TMEM199	0.174634	89	0.10167	0.677986	0.578254	0.0087419	0.192101	0.0800148	0.658062	0.188895	0.095471	0.745373
TMEM178B	0.281242	35	0.101704	0.677986	0.578254	0.0368686	0.307925	0.0919442	0.679387	0.313978	0.0705517	0.705595
C16orf72	0.366802	21	0.101931	0.678823	0.578968	0.0622683	0.485162	0.0352449	0.569971	0.28603	0.235173	0.842678
HMGCL	0.165213	99	0.102212	0.679689	0.579706	0.00809693	0.146579	0.165612	0.753654	0.172924	0.103128	0.752111
AIMP1	0.162728	102	0.102231	0.679689	0.579706	0.00827626	0.166112	0.103923	0.693275	0.168268	0.106899	0.753807
PRSS33	0.172345	91	0.102346	0.679689	0.579706	0.0153059	0.155411	0.158063	0.74902	0.232202	0.036984	0.628961
L3MBTL3	0.172333	91	0.10237	0.679689	0.579706	0.0135633	0.179756	0.0976994	0.686034	0.164386	0.137533	0.78666
MAP3K10	0.174276	89	0.102384	0.679689	0.579706	0.024453	0.172206	0.112858	0.70211	0.10587	0.356259	0.887809
STXBP6	0.289204	33	0.102597	0.680233	0.58017	0.0653685	0.459368	0.00933161	0.434046	0.309773	0.0957406	0.745445
KCTD12	0.235862	49	0.102779	0.680233	0.58017	0.0253017	0.242465	0.104473	0.693535	0.31475	0.0331329	0.619574
SMARCD3	0.272468	37	0.102783	0.680233	0.58017	0.0375355	0.425276	0.0121647	0.458744	0.27424	0.122486	0.769801
MATN1	0.160089	105	0.102822	0.680233	0.58017	0.0113363	0.159685	0.116271	0.706397	0.139088	0.181233	0.814426
DERL1	0.240865	47	0.102904	0.680233	0.58017	0.0262271	0.251617	0.0916332	0.679387	0.208954	0.189821	0.819333
ATP11C	0.167404	96	0.103047	0.680233	0.58017	0.011379	0.160371	0.13106	0.72397	0.212111	0.049923	0.668276
BDH1	0.163136	101	0.103095	0.680233	0.58017	0.00745292	0.213304	0.0389975	0.577995	0.213572	0.0432609	0.647159
SLC16A9	0.165635	98	0.103113	0.680233	0.58017	0.0121736	0.161632	0.125859	0.71734	0.109294	0.305158	0.873965
MED15	0.174825	88	0.103287	0.680233	0.58017	0.0129893	0.202007	0.0687621	0.645343	0.129399	0.258846	0.854312
SLC35D1	0.194884	71	0.103391	0.680645	0.580522	0.01728	0.193677	0.12214	0.714422	0.139455	0.264099	0.857596
SESTD1	0.226092	53	0.10355	0.680664	0.580537	0.0305908	0.250865	0.0788776	0.656365	0.11879	0.416246	0.909516
MCCC1	0.158915	106	0.103719	0.680664	0.580537	0.0184262	0.14388	0.155371	0.74902	0.150222	0.148407	0.794589
PLD5	0.171628	91	0.103802	0.680664	0.580537	0.0135995	0.17553	0.105973	0.693969	0.257381	0.0174064	0.540998
EMC4	0.326172	26	0.103909	0.680664	0.580537	0.0207854	0.309935	0.140512	0.731932	0.350598	0.0790862	0.723352
EPHA6	0.161886	102	0.104043	0.680664	0.580537	0.0127935	0.169488	0.100591	0.689008	0.191974	0.0667634	0.698215
KLF5	0.193146	72	0.104043	0.680664	0.580537	0.0215624	0.226372	0.063414	0.637875	0.161913	0.197546	0.824397
ITGA2B	0.153033	114	0.104049	0.680664	0.580537	0.0118758	0.136976	0.163509	0.751126	0.193088	0.0506841	0.672755
SYT1	0.227846	52	0.104263	0.680855	0.580701	0.0263328	0.230265	0.111448	0.699168	0.116375	0.425852	0.91384
GLYATL3	0.163353	100	0.104393	0.680855	0.580701	0.00757438	0.159906	0.115761	0.706397	0.21236	0.0444901	0.648461
CARTPT	0.213454	59	0.104535	0.681135	0.580939	0.0166371	0.202596	0.137965	0.731871	0.140653	0.301153	0.87308
TCF15	0.242357	46	0.104631	0.681135	0.580939	0.0301375	0.278548	0.0704936	0.645343	0.338434	0.0304386	0.601552
TMEM212	0.164065	99	0.104652	0.681135	0.580939	0.0072928	0.176509	0.0923541	0.681038	0.119088	0.26633	0.858676
KCTD17	0.187486	76	0.104847	0.682088	0.581752	0.00804156	0.193011	0.106815	0.693969	0.200563	0.0911698	0.739137
FANCD2OS	0.194049	71	0.104906	0.682089	0.581753	0.0345391	0.216701	0.0829413	0.664497	0.294203	0.0182887	0.551544
RUNX1	0.198318	68	0.104974	0.682295	0.581928	0.016288	0.219507	0.0838912	0.66552	0.108125	0.398946	0.902009
KDM5A	0.17705	85	0.105021	0.682369	0.581992	0.0166171	0.185538	0.0994091	0.688931	0.128851	0.267294	0.859551
PRMT3	0.159731	104	0.105303	0.682446	0.582058	0.00516262	0.160834	0.115542	0.706397	0.11857	0.255029	0.852606
PTPRH	0.167208	95	0.10532	0.682446	0.582058	0.00785612	0.177647	0.0997359	0.688931	0.148898	0.168691	0.805909
OR5C1	0.160496	103	0.10534	0.682446	0.582058	0.0130643	0.16533	0.109345	0.696692	0.187982	0.0696197	0.702991
SULT1C2	0.176875	85	0.10537	0.682446	0.582058	0.0168553	0.183621	0.105264	0.693969	0.121144	0.293939	0.871256
SLC25A42	0.182365	80	0.105435	0.682446	0.582058	0.0119353	0.186027	0.102957	0.691155	0.218858	0.057507	0.687613
MUSK	0.164414	98	0.105715	0.683335	0.582816	0.0116468	0.166494	0.112691	0.701764	0.138911	0.194198	0.82012
2019-09-06	0.236333	48	0.105834	0.683455	0.582918	0.0289159	0.238541	0.10637	0.693969	0.187588	0.234197	0.842656
CHCHD10	0.186953	76	0.105858	0.683455	0.582918	0.0221593	0.179592	0.133972	0.727463	0.216364	0.0741581	0.714495
HIAT1	0.300836	30	0.106224	0.685244	0.584444	0.026787	0.29011	0.119913	0.710998	0.279982	0.141282	0.789172
TYRO3	0.15777	106	0.106264	0.685254	0.584452	0.0126569	0.170198	0.0938353	0.682112	0.0957795	0.353259	0.887262
TUBA3E	0.405549	17	0.106301	0.685254	0.584452	0.0316113	0.411186	0.101067	0.689008	0.254533	0.379848	0.896449
RND2	0.238483	47	0.106458	0.685254	0.584452	0.025419	0.261586	0.0901832	0.67754	0.225827	0.155696	0.79713
LPPR2	0.184168	78	0.106504	0.685254	0.584452	0.0142149	0.21805	0.0619948	0.6338	0.172591	0.150069	0.794593
KRT81	0.156893	107	0.106556	0.685254	0.584452	0.0117019	0.156505	0.121868	0.714044	0.233692	0.0219321	0.56488
SHANK1	0.210312	60	0.106767	0.685482	0.584647	0.0129225	0.239556	0.0810396	0.660716	0.232168	0.0976801	0.74795
RNF19B	0.180425	81	0.106995	0.686506	0.585521	0.0206671	0.247237	0.0313036	0.550486	0.0860002	0.469406	0.921136
OTOG	0.148352	119	0.10736	0.688211	0.586974	0.00803868	0.130989	0.174573	0.758445	0.140905	0.147717	0.794568
RBMS3	0.217242	56	0.10777	0.689118	0.587748	0.0219093	0.217061	0.114887	0.706375	0.143902	0.313722	0.875323
KRTAP12-3	0.188435	74	0.107874	0.689152	0.587777	0.00962444	0.182842	0.138612	0.731871	0.205742	0.0923368	0.743147
KCNMB4	0.251575	42	0.10802	0.689326	0.587925	0.0336319	0.249233	0.116083	0.706397	0.269077	0.0976363	0.74795
LAMB3	0.156921	106	0.108184	0.689403	0.587991	0.00586614	0.143853	0.15545	0.74902	0.190002	0.0609438	0.692403
OR56A4	0.165859	95	0.108199	0.689403	0.587991	0.0105798	0.155557	0.143181	0.735632	0.194949	0.0737885	0.713737
OR4F17	0.1845	77	0.108202	0.689403	0.587991	0.00905115	0.184355	0.113342	0.703222	0.151968	0.20582	0.826745
COMP	0.159986	102	0.108224	0.689403	0.587991	0.00889601	0.182209	0.0788007	0.656365	0.154842	0.140538	0.788139
DYNC1LI2	0.196513	68	0.108241	0.689403	0.587991	0.0179021	0.202731	0.105314	0.693969	0.101101	0.434288	0.913909
NR1D2	0.176467	84	0.10833	0.689403	0.587991	0.0115195	0.173996	0.120304	0.711241	0.141575	0.225668	0.838197
MSL2	0.214936	57	0.108361	0.689403	0.587991	0.0169635	0.243685	0.0817067	0.663584	0.250299	0.0735083	0.71352
MOCS1	0.153845	110	0.108564	0.689438	0.588021	0.00633033	0.145956	0.147343	0.742545	0.123114	0.222348	0.835785
PAMR1	0.152417	112	0.108643	0.689438	0.588021	0.010583	0.177706	0.0697378	0.645343	0.148714	0.137751	0.78666
MLLT3	0.205721	62	0.108694	0.689438	0.588021	0.016731	0.215131	0.0987927	0.688931	0.168134	0.211232	0.829494
GNAT3	0.18067	80	0.108768	0.689464	0.588043	0.0146965	0.241337	0.0383174	0.57504	0.235932	0.0444868	0.648461
CYP27C1	0.212794	58	0.108771	0.689464	0.588043	0.0109176	0.211765	0.124236	0.715739	0.235977	0.088926	0.738904
CACNG5	0.207303	61	0.108921	0.689493	0.588068	0.0221322	0.230019	0.0823846	0.664003	0.202755	0.130377	0.778229
UBAP1	0.156597	106	0.108922	0.689493	0.588068	0.0126539	0.155738	0.121802	0.71388	0.0914285	0.375652	0.895534
ZNF540	0.210671	59	0.109243	0.69015	0.588628	0.00640819	0.174491	0.202615	0.778347	0.224158	0.110147	0.758895
KLKB1	0.157186	105	0.109296	0.690156	0.588634	0.0116814	0.163461	0.109641	0.696692	0.195548	0.0589166	0.690984
LOC100505841	0.185032	76	0.109556	0.690652	0.589057	0.0134204	0.165428	0.164915	0.752902	0.127217	0.29756	0.872141
OTOF	0.154825	108	0.109615	0.690652	0.589057	0.00822536	0.18092	0.0688003	0.645343	0.192696	0.0573051	0.687096
IL17D	0.297782	30	0.109995	0.692129	0.590316	0.015056	0.425644	0.0239309	0.528629	0.288503	0.136518	0.786528
SYCN	0.174551	85	0.1101	0.692327	0.590485	0.0103391	0.171316	0.131143	0.72397	0.219892	0.051511	0.674221
MYH7B	0.159036	102	0.110362	0.692743	0.59084	0.0111805	0.17735	0.0838743	0.66552	0.175221	0.0947938	0.74523
KRT5	0.158216	103	0.110446	0.692743	0.59084	0.0105194	0.151535	0.138428	0.731871	0.206776	0.0455419	0.653715
OR12D3	0.198292	66	0.110478	0.692743	0.59084	0.0162471	0.201668	0.110039	0.697304	0.231641	0.0829589	0.730309
HTR1E	0.19105	71	0.110494	0.692743	0.59084	0.0141652	0.200316	0.106815	0.693969	0.251718	0.0465783	0.659239
AGO3	0.341575	23	0.11067	0.692743	0.59084	0.0313579	0.350622	0.109635	0.696692	0.275251	0.227194	0.838781
ZG16	0.176319	83	0.110824	0.692743	0.59084	0.00860445	0.185637	0.103692	0.693148	0.213565	0.0676963	0.700188
BMP4	0.186839	74	0.110946	0.692743	0.59084	0.0148743	0.206708	0.0859975	0.670079	0.192091	0.119403	0.764564
ATPAF2	0.166374	93	0.110962	0.692743	0.59084	0.0105422	0.174031	0.102877	0.691155	0.205915	0.0602237	0.692403
PLG	0.156361	105	0.111193	0.693172	0.591206	0.00863759	0.175389	0.0809164	0.660556	0.201735	0.0487228	0.662815
PTPRR	0.153419	109	0.111222	0.693172	0.591206	0.0109656	0.141366	0.156406	0.74902	0.158703	0.118564	0.764424
SUCLG1	0.164444	95	0.111284	0.69324	0.591264	0.00822676	0.175922	0.0953114	0.685019	0.237772	0.027492	0.591925
GPR3	0.176043	83	0.111392	0.69324	0.591264	0.0141061	0.18417	0.1065	0.693969	0.152052	0.19282	0.819333
TBC1D10A	0.168916	90	0.111489	0.693468	0.591458	0.00949728	0.160686	0.144247	0.737942	0.169061	0.128924	0.778229
ZNF778	0.31935	26	0.111779	0.694812	0.592604	0.0069672	0.359048	0.10079	0.689008	0.292361	0.165649	0.804538
U2AF2	0.399663	17	0.111968	0.695444	0.593143	0.0696748	0.445231	0.0962918	0.685805	0.320642	0.24394	0.844233
TMEM60	0.301445	29	0.112027	0.695444	0.593143	0.0238994	0.292604	0.138578	0.731871	0.265148	0.172688	0.807399
LRRC2	0.160697	99	0.112072	0.695491	0.593184	0.0144781	0.166413	0.110877	0.698029	0.181096	0.0894362	0.738904
B3GAT2	0.184958	75	0.112146	0.695508	0.593198	0.0135018	0.211138	0.0793388	0.656452	0.162959	0.187636	0.817068
PDLIM5	0.153695	108	0.112261	0.695913	0.593543	0.00553457	0.171529	0.0895785	0.675197	0.144075	0.15696	0.79713
CLCN1	0.152256	110	0.112307	0.695913	0.593543	0.0148353	0.152429	0.128076	0.717765	0.147444	0.143216	0.789365
ASIC5	0.159627	100	0.112652	0.696332	0.593901	0.0124341	0.148834	0.156792	0.74902	0.152514	0.153627	0.7958
GPRC5A	0.154214	107	0.112745	0.696332	0.593901	0.00621487	0.142424	0.15964	0.74902	0.138812	0.1774	0.810093
SLC5A8	0.150629	112	0.112901	0.696532	0.594072	0.00353227	0.161712	0.102694	0.691155	0.1844	0.0648935	0.695461
OBSCN	0.151263	111	0.113023	0.696566	0.5941	0.0071998	0.159743	0.110561	0.697442	0.183178	0.0667212	0.698215
NAE1	0.172099	86	0.113086	0.696566	0.5941	0.0142171	0.182433	0.103082	0.69127	0.150983	0.187003	0.816676
ST8SIA2	0.195378	67	0.113091	0.696566	0.5941	0.0186339	0.211427	0.101905	0.690366	-0.00082089	0.99499	0.999851
UNC13A	0.166294	92	0.113129	0.696576	0.594109	0.017887	0.179035	0.101118	0.689008	0.101593	0.360777	0.889206
ZNF549	0.201529	63	0.113227	0.696699	0.594214	0.00961379	0.222237	0.093601	0.682112	0.239458	0.0653695	0.695779
TUFT1	0.153274	108	0.11326	0.696699	0.594214	0.0140498	0.148519	0.140291	0.731932	0.144112	0.159042	0.799391
COMT	0.156918	103	0.113438	0.696999	0.59447	0.00626707	0.140088	0.180472	0.762201	0.13316	0.20321	0.825871
AIP	0.177173	81	0.113577	0.696999	0.59447	0.0132589	0.182826	0.111497	0.699168	0.180456	0.126568	0.77565
SLC24A4	0.156832	103	0.113637	0.696999	0.59447	0.00625282	0.160647	0.119901	0.710998	0.16791	0.107659	0.753807
RHOU	0.250475	41	0.114216	0.698275	0.595558	0.00900179	0.248136	0.133066	0.726798	0.199998	0.22863	0.839293
COCH	0.16484	93	0.114341	0.698294	0.595574	0.00841282	0.15916	0.136277	0.729394	0.0799873	0.469513	0.921136
ANKRD23	0.161343	97	0.11438	0.698294	0.595574	0.01135	0.178978	0.0933112	0.682112	0.182684	0.0866159	0.736056
MAP3K8	0.180129	78	0.11454	0.698294	0.595574	0.0106598	0.178959	0.132553	0.725626	0.246288	0.0398532	0.639273
PI4KA	0.164737	93	0.114569	0.698294	0.595574	0.0141013	0.162743	0.127561	0.717765	0.157297	0.15052	0.794593
TSPAN9	0.188843	71	0.114748	0.698294	0.595574	0.0119288	0.189444	0.121796	0.71388	0.148835	0.236704	0.842678
ERCC2	0.182412	76	0.114764	0.698294	0.595574	0.0119829	0.172649	0.138549	0.731871	0.148106	0.224558	0.837993
HBD	0.178833	79	0.114817	0.698294	0.595574	0.00765098	0.178432	0.123035	0.714645	0.170033	0.153306	0.795788
COL3A1	0.151102	110	0.115088	0.698294	0.595574	0.00542618	0.186219	0.0622481	0.634051	0.190344	0.0591416	0.690984
AFF3	0.150982	110	0.115381	0.698294	0.595574	0.0133204	0.169801	0.0863937	0.670874	0.104203	0.302193	0.87308
NCK1	0.214347	55	0.116078	0.698294	0.595574	0.0233274	0.211319	0.132622	0.725626	0.381922	0.00620241	0.46893
CLCN2	0.164051	93	0.116108	0.698294	0.595574	0.0116591	0.14847	0.162542	0.750769	0.172772	0.118304	0.764424
CSRP1	0.234755	46	0.116322	0.698294	0.595574	0.0243123	0.230823	0.14651	0.740078	0.210627	0.180603	0.814261
UCMA	0.160421	97	0.116493	0.698294	0.595574	0.0190226	0.160072	0.131788	0.72397	0.158924	0.143868	0.789365
ZNF32	0.237251	45	0.116591	0.698294	0.595574	0.0138925	0.242643	0.116937	0.708495	0.162835	0.315416	0.875323
TRAK2	0.154803	104	0.116628	0.698294	0.595574	0.0102955	0.168052	0.0998907	0.688931	0.180548	0.0816143	0.72799
SEMA6D	0.1587	99	0.11666	0.698294	0.595574	0.0204834	0.223635	0.0321195	0.554794	0.133384	0.210093	0.828458
FADS3	0.158626	99	0.116832	0.698294	0.595574	0.0100016	0.14159	0.171098	0.756872	0.0770505	0.470404	0.921136
AP3M2	0.215928	54	0.11684	0.698294	0.595574	0.0140845	0.220846	0.123263	0.714645	0.195795	0.192211	0.819333
RNF182	0.186434	72	0.116871	0.698294	0.595574	0.0210797	0.202942	0.0995413	0.688931	0.0636256	0.60899	0.946462
OR52K2	0.172366	84	0.116916	0.698294	0.595574	0.0157018	0.17507	0.125256	0.71734	0.161175	0.16141	0.801396
SLC6A13	0.157784	100	0.116917	0.698294	0.595574	0.00977607	0.158921	0.126037	0.71734	0.0979369	0.355712	0.887809
OR4F6	0.180152	77	0.11692	0.698294	0.595574	0.0161648	0.181249	0.124881	0.716566	0.0774693	0.526927	0.934718
HIPK3	0.159396	98	0.116944	0.698294	0.595574	0.0125462	0.187172	0.0756402	0.653604	0.0888965	0.410149	0.906498
ABRA	0.153167	106	0.116993	0.698294	0.595574	0.00546577	0.149422	0.139904	0.731871	0.220246	0.0310647	0.603667
SEC14L3	0.171256	85	0.117086	0.698294	0.595574	0.0130795	0.206712	0.0693971	0.645343	0.0453424	0.689615	0.961167
LOR	0.206201	59	0.117146	0.698294	0.595574	0.00456243	0.214629	0.122756	0.714613	0.191716	0.164901	0.803408
KRT14	0.153073	106	0.117222	0.698294	0.595574	0.00637046	0.178232	0.0791123	0.656365	0.141445	0.16698	0.804634
COL1A2	0.150214	110	0.117263	0.698294	0.595574	0.00675213	0.158649	0.109462	0.696692	0.236348	0.0179131	0.547752
MTSS1	0.160924	96	0.11728	0.698294	0.595574	0.0135149	0.170192	0.108773	0.69634	0.162463	0.132725	0.781394
GPR85	0.335692	23	0.117353	0.698294	0.595574	0.0531804	0.325213	0.13972	0.731871	0.352955	0.107132	0.753807
F13A1	0.152257	107	0.117442	0.698465	0.59572	0.00543391	0.126557	0.211936	0.783891	0.162266	0.108565	0.756039
CLDN9	0.196041	65	0.117561	0.698465	0.59572	0.0122414	0.155304	0.228086	0.792418	0.271005	0.0362238	0.624857
ZNF850	0.269344	35	0.117662	0.698465	0.59572	0.00632556	0.274936	0.134422	0.727485	0.231253	0.195368	0.821212
NPEPPS	0.178601	78	0.1177	0.698465	0.59572	0.0111971	0.232992	0.047287	0.59344	0.164817	0.172733	0.807399
DMKN	0.156641	101	0.117746	0.698465	0.59572	0.00592162	0.168074	0.107311	0.694292	0.177689	0.0938351	0.745176
EPHA8	0.158946	98	0.117994	0.698465	0.59572	0.00976277	0.177562	0.0903958	0.678495	0.141425	0.186168	0.816495
KRT38	0.153478	105	0.118021	0.698465	0.59572	0.0071026	0.150426	0.137231	0.731602	0.177583	0.0868358	0.736392
CTPS1	0.188461	70	0.118188	0.698465	0.59572	0.0152938	0.21692	0.0778646	0.656365	0.150687	0.238462	0.842879
SPCS2	0.191209	68	0.118297	0.698465	0.59572	0.0228958	0.190913	0.127665	0.717765	0.188343	0.146052	0.793022
COLGALT2	0.163967	92	0.118334	0.698465	0.59572	0.0115395	0.155236	0.153521	0.74854	0.162739	0.146619	0.794049
FREM2	0.146409	115	0.118444	0.698465	0.59572	0.0131781	0.164227	0.0909674	0.678922	0.13876	0.162161	0.801396
HOMER1	0.247649	41	0.118497	0.698465	0.59572	0.0267575	0.263805	0.104642	0.693535	0.294946	0.0763665	0.715224
SESN1	0.171631	84	0.118509	0.698465	0.59572	0.0153547	0.184364	0.106126	0.693969	0.0597916	0.60547	0.945577
PKM	0.154739	103	0.118599	0.698465	0.59572	0.010249	0.146982	0.155208	0.74902	0.0739727	0.478593	0.922916
GBA2	0.148289	112	0.118671	0.698465	0.59572	0.00840498	0.18471	0.0617859	0.633309	0.207684	0.0371606	0.629701
HSPD1	0.182943	74	0.118726	0.698465	0.59572	0.0194514	0.184313	0.126656	0.717765	0.10146	0.413945	0.909372
DARC	0.149617	110	0.118745	0.698465	0.59572	0.00291429	0.157121	0.114772	0.706375	0.172463	0.0878212	0.738098
HLA-DPB1	0.181535	75	0.119063	0.698533	0.595778	0.0406555	0.18754	0.12003	0.711241	0.345607	0.00338563	0.423809
LSAMP	0.241268	43	0.11909	0.698533	0.595778	0.0216355	0.239574	0.131388	0.72397	0.26166	0.102898	0.751699
KRTAP10-5	0.205036	59	0.119277	0.698974	0.596154	0.00824846	0.209531	0.136008	0.729385	0.195269	0.16536	0.804404
THEM4	0.158384	98	0.119316	0.698974	0.596154	0.0150723	0.14164	0.185496	0.764898	0.170949	0.115552	0.760736
C11orf68	0.177691	78	0.119612	0.699431	0.596544	0.0118635	0.183369	0.115319	0.706397	0.17714	0.133809	0.781419
TRPM5	0.162195	93	0.120351	0.70245	0.599119	0.0124792	0.184928	0.0882705	0.67317	0.183264	0.0931817	0.745176
OR13J1	0.156195	100	0.120697	0.703437	0.599961	0.0102582	0.156411	0.138721	0.731871	0.174821	0.0974351	0.74795
GPR78	0.255782	38	0.121146	0.704722	0.601057	0.0103612	0.24141	0.162385	0.750769	0.226073	0.178481	0.81053
MFAP4	0.170379	84	0.12126	0.705146	0.601418	0.00972578	0.170378	0.125925	0.71734	0.107181	0.360052	0.88899
MSRB3	0.174553	80	0.12148	0.70581	0.601984	0.0118331	0.173379	0.136861	0.730866	0.190427	0.104134	0.753807
RIOK3	0.163488	91	0.121512	0.70581	0.601984	0.0127807	0.161143	0.135944	0.729259	0.0967798	0.387062	0.899487
PRR7	0.221797	50	0.121617	0.705922	0.60208	0.0327724	0.223512	0.130983	0.72397	0.211435	0.173495	0.808212
LOXL4	0.147109	112	0.121665	0.705973	0.602124	0.0119701	0.140689	0.156345	0.74902	0.224329	0.0234107	0.571673
OR5H1	0.176562	78	0.122019	0.706136	0.602263	0.0112508	0.178143	0.128881	0.719719	0.13875	0.251998	0.851484
TP53BP1	0.14697	112	0.122021	0.706136	0.602263	0.0145754	0.15613	0.113491	0.703243	0.167583	0.0939159	0.745176
SGMS1	0.174261	80	0.122113	0.706136	0.602263	0.0128406	0.166293	0.156766	0.74902	0.168338	0.154551	0.796725
TPPP3	0.226185	48	0.122138	0.706136	0.602263	0.0398856	0.223824	0.139399	0.731871	0.234831	0.120479	0.766587
RAB2A	0.356979	20	0.122325	0.706535	0.602603	0.0662633	0.305058	0.218345	0.788512	0.369541	0.131224	0.778276
PSD	0.152418	104	0.122439	0.706535	0.602603	0.00386053	0.158036	0.122096	0.714422	0.14796	0.154684	0.796725
OR13G1	0.205118	58	0.122443	0.706535	0.602603	0.0129535	0.238882	0.0880978	0.67317	0.281955	0.0408133	0.642474
ARHGAP1	0.158707	96	0.122481	0.706535	0.602603	0.00783121	0.144871	0.180637	0.76223	0.158169	0.145806	0.792138
CBX3	0.416464	15	0.122546	0.706535	0.602603	0.0699035	0.3918	0.165915	0.7538	0.44706	0.109	0.756844
TCRBV4S1A1T	0.154602	101	0.122663	0.706535	0.602603	0.0110927	0.148605	0.15065	0.745999	0.219928	0.0351614	0.624205
UBXN7	0.190282	67	0.12299	0.707208	0.603177	0.0317845	0.201508	0.110329	0.697442	0.0540619	0.673888	0.960763
PHYH	0.153557	102	0.123343	0.708133	0.603966	0.00899333	0.137567	0.18136	0.763867	0.200441	0.0553953	0.686643
ASIC4	0.157468	97	0.123463	0.708144	0.603975	0.0162913	0.183872	0.0845529	0.668215	0.167835	0.120218	0.766414
PTPRG	0.150383	106	0.123879	0.708375	0.604172	0.011886	0.168712	0.0985456	0.688655	0.163232	0.112046	0.758895
SLC25A20	0.164278	89	0.123961	0.708375	0.604172	0.00967127	0.152624	0.160647	0.74902	0.125459	0.264423	0.857608
TSPAN1	0.150291	106	0.124112	0.708375	0.604172	0.00985863	0.16058	0.116126	0.706397	0.16988	0.0997938	0.749265
WFS1	0.15886	95	0.124131	0.708375	0.604172	0.00781746	0.142675	0.184817	0.764898	0.187691	0.0817092	0.72799
SBF1	0.161462	92	0.124141	0.708375	0.604172	0.0118311	0.160309	0.138008	0.731871	0.169712	0.120474	0.766587
LHFPL3	0.322558	24	0.124227	0.708375	0.604172	0.0476914	0.322636	0.124131	0.715739	0.381492	0.0658525	0.696012
GSG1L	0.243885	41	0.124381	0.708717	0.604464	0.0146073	0.275823	0.103463	0.692342	0.255254	0.11681	0.76267
KRT25	0.156177	98	0.124619	0.709219	0.604892	0.0080768	0.161387	0.122234	0.714422	0.177314	0.0983933	0.74795
ADSL	0.158536	95	0.12491	0.709775	0.605367	0.013992	0.173344	0.104262	0.693535	0.234884	0.0304771	0.601552
IL36RN	0.161087	92	0.125028	0.709775	0.605367	0.0138635	0.166019	0.122133	0.714422	0.122948	0.26815	0.859551
CDK15	0.154417	100	0.125038	0.709775	0.605367	0.00812268	0.150834	0.148968	0.744487	0.203584	0.0516017	0.674221
PAQR4	0.192172	65	0.125125	0.709785	0.605375	0.0141501	0.19619	0.126448	0.71756	0.218315	0.0909747	0.739137
MYOF	0.146359	111	0.125326	0.710254	0.605775	0.0140849	0.142936	0.151811	0.747446	0.216714	0.0311961	0.604999
POLE4	0.196705	62	0.125436	0.710596	0.606067	0.0212345	0.183549	0.167838	0.754517	0.159743	0.244029	0.844233
RNF220	0.207151	56	0.125552	0.710686	0.606144	0.0231344	0.234344	0.0912233	0.678922	0.213533	0.128519	0.778229
FABP1	0.168434	84	0.125632	0.710928	0.60635	0.013866	0.173851	0.127949	0.717765	0.171475	0.141293	0.789172
AKT2	0.187528	68	0.125684	0.710984	0.606397	0.0156873	0.206125	0.102237	0.69062	0.191245	0.136487	0.786528
SLC33A1	0.158201	95	0.125721	0.710984	0.606397	0.0150632	0.159298	0.142915	0.735632	0.129387	0.237924	0.842678
FAM84B	0.170443	82	0.12578	0.710984	0.606397	0.0111641	0.174937	0.123072	0.714645	0.180393	0.118904	0.764424
MS4A4A	0.174808	78	0.125832	0.710984	0.606397	0.005371	0.161269	0.17287	0.758445	0.170784	0.157491	0.797246
FKBP9	0.167315	85	0.125882	0.710984	0.606397	0.0109948	0.161332	0.150188	0.745272	0.0600593	0.601436	0.945085
PPP1R9B	0.173649	79	0.125898	0.710984	0.606397	0.0234072	0.188129	0.113522	0.703243	0.143769	0.23164	0.841679
TMEM19	0.155639	98	0.125938	0.710984	0.606397	0.00904227	0.17778	0.0899953	0.677024	0.178366	0.0944541	0.745176
APBB1	0.166282	86	0.12598	0.710984	0.606397	0.0114449	0.161722	0.144113	0.737553	0.167363	0.145705	0.792135
CRISPLD1	0.168253	84	0.126045	0.710987	0.6064	0.0113525	0.158567	0.160065	0.74902	0.190425	0.0994164	0.749265
APOBEC3F	0.205003	57	0.12608	0.710987	0.6064	0.00856782	0.212458	0.122983	0.714645	0.163696	0.255995	0.852795
ZDHHC13	0.150162	105	0.126274	0.711367	0.606724	0.00884126	0.155479	0.124364	0.715769	0.237101	0.0206965	0.558038
OR11H6	0.156283	97	0.126348	0.711367	0.606724	0.011057	0.150617	0.147329	0.742545	0.19252	0.0723309	0.708267
MAP1LC3A	0.373702	18	0.126604	0.712091	0.607342	0.0486577	0.410117	0.102045	0.690576	0.24559	0.342049	0.88302
YIPF4	0.236479	43	0.126824	0.712771	0.607922	0.0222883	0.23555	0.128367	0.718889	0.200529	0.20871	0.826745
MOB3B	0.30069	27	0.127504	0.713891	0.608877	0.0339531	0.285289	0.1766	0.759703	0.138867	0.517544	0.93351
NCKIPSD	0.153423	100	0.127515	0.713891	0.608877	0.0194905	0.149187	0.153507	0.74854	0.0582476	0.58553	0.943158
KRT35	0.146177	110	0.127559	0.713891	0.608877	0.00878814	0.159047	0.112143	0.700448	0.173853	0.0852556	0.733325
TCRBV12S2	0.163668	88	0.127588	0.713891	0.608877	0.0191867	0.158256	0.153023	0.748082	0.160803	0.156863	0.79713
HSF2	0.172887	79	0.127594	0.713891	0.608877	0.0116412	0.176993	0.128741	0.719284	0.0334486	0.783402	0.97241
MYO15A	0.14547	111	0.127662	0.713891	0.608877	0.00885709	0.148127	0.133448	0.727463	0.0973946	0.332582	0.879462
MEA1	0.185107	69	0.127829	0.713891	0.608877	0.0230771	0.189819	0.126873	0.717765	0.115256	0.364459	0.891508
TSC22D1	0.14881	106	0.127904	0.713891	0.608877	0.0127815	0.155805	0.125529	0.71734	0.146411	0.156838	0.79713
PRSS57	0.159884	92	0.12791	0.713891	0.608877	0.00843907	0.155237	0.151078	0.746469	0.146421	0.183836	0.8164
CPA4	0.1467	109	0.127964	0.713891	0.608877	0.00529052	0.140474	0.159065	0.74902	0.170561	0.0931267	0.745176
MAP2K2	0.187746	67	0.128158	0.713891	0.608877	0.0290551	0.200579	0.112015	0.700086	0.12139	0.355524	0.887809
GRSF1	0.169371	82	0.128213	0.713891	0.608877	0.0234791	0.230835	0.0463151	0.590582	0.152331	0.195089	0.820768
OR2S2	0.154695	98	0.12828	0.713891	0.608877	0.0147566	0.157021	0.137169	0.731475	0.134536	0.206146	0.826745
OR4F15	0.168286	83	0.128317	0.713891	0.608877	0.0191857	0.180056	0.109996	0.697304	0.0761559	0.516082	0.932899
OR6B1	0.155462	97	0.128376	0.713891	0.608877	0.00977276	0.191094	0.0696034	0.645343	0.21171	0.049009	0.663549
ZNF627	0.274516	32	0.128387	0.713891	0.608877	0.0173806	0.276816	0.13864	0.731871	0.150203	0.454578	0.918026
GRXCR1	0.165241	86	0.128403	0.713891	0.608877	0.0187042	0.17981	0.108217	0.69587	0.306477	0.00708871	0.46893
TMEM127	0.319152	24	0.12848	0.713891	0.608877	0.0256332	0.355225	0.096241	0.685805	0.325552	0.129553	0.778229
NPC1L1	0.144482	112	0.12854	0.713891	0.608877	0.0128129	0.143125	0.151265	0.746871	0.282832	0.00435512	0.451031
LYPD3	0.156203	96	0.128568	0.713891	0.608877	0.00825648	0.152573	0.155864	0.74902	0.197621	0.0698435	0.702991
TAOK3	0.167992	83	0.128994	0.7142	0.609141	0.0135567	0.178847	0.11964	0.710891	0.172722	0.141129	0.789172
PRLH	0.165945	85	0.129058	0.7142	0.609141	0.00745564	0.164082	0.140745	0.732056	0.125029	0.275413	0.863065
USP1	0.152805	100	0.129074	0.7142	0.609141	0.00966508	0.16967	0.105898	0.693969	0.126298	0.235553	0.842678
VPS4B	0.172117	79	0.129326	0.7142	0.609141	0.0108735	0.185299	0.116533	0.707323	0.152236	0.192278	0.819333
S100A7A	0.21522	51	0.12934	0.7142	0.609141	0.0170574	0.242429	0.100621	0.689008	0.280319	0.0563293	0.686643
FBXL19	0.193115	63	0.129413	0.7142	0.609141	0.0244635	0.212009	0.106959	0.693969	0.1716	0.197747	0.824397
OR4F5	0.180348	72	0.129524	0.7142	0.609141	0.0162541	0.179789	0.133539	0.727463	0.156619	0.202148	0.825656
SCN3A	0.158272	93	0.129709	0.7142	0.609141	0.00873155	0.158287	0.140768	0.732056	0.0936547	0.399705	0.902303
SLC35D3	0.161832	89	0.129735	0.7142	0.609141	0.0114271	0.161209	0.140501	0.731932	0.131757	0.244014	0.844233
AADACL4	0.159131	92	0.129739	0.7142	0.609141	0.0131983	0.145043	0.190773	0.767806	0.254136	0.0212262	0.558516
IP6K1	0.172995	78	0.129866	0.7142	0.609141	0.0140137	0.188401	0.107939	0.69555	0.18625	0.11724	0.76343
OR52Z1	0.175276	76	0.129912	0.7142	0.609141	0.0070958	0.143628	0.232103	0.795521	0.123868	0.31423	0.875323
FBXO34	0.145951	109	0.129943	0.7142	0.609141	0.0124662	0.128071	0.201837	0.776978	0.125187	0.221792	0.835785
KRTAP10-6	0.199427	59	0.129947	0.7142	0.609141	0.0120791	0.187979	0.173448	0.758445	0.224889	0.1126	0.758895
MYOM1	0.14204	115	0.129961	0.7142	0.609141	0.00674358	0.157182	0.105906	0.693969	0.217311	0.0266977	0.591925
SPTSSA	0.311094	25	0.130106	0.7142	0.609141	0.0310861	0.294137	0.173094	0.758445	0.298637	0.166307	0.804634
BOLL	0.180077	72	0.13011	0.7142	0.609141	0.0213475	0.195707	0.115298	0.706397	0.180276	0.144334	0.790267
FAM213A	0.156394	95	0.130155	0.7142	0.609141	0.0069803	0.168205	0.11939	0.710524	0.0656411	0.548192	0.937101
NSFL1C	0.191201	64	0.130163	0.7142	0.609141	0.0194344	0.193454	0.135223	0.72847	0.178966	0.175026	0.809304
PCDH20	0.150817	102	0.130261	0.7142	0.609141	0.0118829	0.139754	0.176773	0.759703	0.128461	0.222325	0.835785
GOLPH3	0.231653	44	0.13027	0.7142	0.609141	0.0258832	0.220527	0.155303	0.74902	0.143194	0.371776	0.895496
SERF2	0.20265	57	0.130582	0.7142	0.609141	0.0292146	0.215302	0.11793	0.708967	0.145804	0.292798	0.870453
ACY1	0.152206	100	0.130598	0.7142	0.609141	0.0169942	0.140024	0.185566	0.764898	0.130699	0.219497	0.83531
YRDC	0.181137	71	0.130601	0.7142	0.609141	0.0218558	0.193903	0.115891	0.706397	0.0488113	0.697128	0.962222
CCDC177	0.169266	81	0.130881	0.7142	0.609141	0.0104346	0.163771	0.160327	0.74902	0.170128	0.153073	0.795788
CHD7	0.149099	104	0.13089	0.7142	0.609141	0.0114649	0.14233	0.1621	0.750769	0.125972	0.226346	0.838237
OR4N5	0.186397	67	0.13097	0.7142	0.609141	0.0133112	0.198037	0.126037	0.71734	0.186637	0.156955	0.79713
DSCR3	0.170293	80	0.130985	0.7142	0.609141	0.0164841	0.160651	0.168553	0.754702	0.0737793	0.535036	0.935682
CYFIP1	0.218741	49	0.131041	0.7142	0.609141	0.0148929	0.208039	0.160543	0.74902	0.110487	0.475241	0.921466
TP53I11	0.184949	68	0.131066	0.7142	0.609141	0.0132716	0.189606	0.130344	0.723284	0.24251	0.0575483	0.687673
RHOT1	0.177093	74	0.131188	0.7142	0.609141	0.0199407	0.186	0.12597	0.71734	0.0733113	0.558553	0.93862
DAPL1	0.169112	81	0.131235	0.714234	0.60917	0.0117438	0.189162	0.099424	0.688931	0.134009	0.254992	0.852606
MEDAG	0.171187	79	0.131439	0.714547	0.609437	0.0166609	0.197187	0.0944955	0.682523	0.151319	0.207788	0.826745
TRPC4	0.161107	89	0.131488	0.714599	0.60948	0.00926144	0.161123	0.138333	0.731871	0.132277	0.242144	0.843898
SELT	0.236389	42	0.13176	0.714609	0.609489	0.0262668	0.229136	0.149566	0.745272	0.162562	0.322777	0.877205
AK2	0.178037	73	0.131819	0.714609	0.609489	0.0153981	0.172124	0.157294	0.74902	0.258044	0.0364494	0.626625
NMBR	0.154091	97	0.131821	0.714609	0.609489	0.00602773	0.161424	0.128515	0.718889	0.190073	0.0744078	0.715102
AVL9	0.154081	97	0.131844	0.714609	0.609489	0.015996	0.152461	0.151413	0.746871	0.105549	0.330564	0.879168
SLC6A4	0.148006	105	0.131871	0.714609	0.609489	0.00543369	0.148892	0.14133	0.732777	0.140639	0.174021	0.80871
OR52J3	0.157392	93	0.131884	0.714609	0.609489	0.0145447	0.157011	0.146407	0.740078	0.144245	0.182548	0.815959
SGIP1	0.156532	94	0.131905	0.714609	0.609489	0.0132544	0.189613	0.07683	0.654263	0.146843	0.177283	0.810058
FAAH	0.146524	107	0.132068	0.715039	0.609856	0.0125707	0.135921	0.182043	0.763867	0.159796	0.119904	0.765481
KRTAP5-4	0.255813	36	0.132095	0.715039	0.609856	0.0127852	0.250037	0.153814	0.748766	0.214313	0.246978	0.846291
LOC100131060	0.157291	93	0.132135	0.715039	0.609856	0.00672952	0.151053	0.165049	0.752902	0.218169	0.0489462	0.663549
TDRKH	0.14929	103	0.132301	0.715385	0.610152	0.00664563	0.146411	0.156837	0.74902	0.120662	0.24928	0.848179
FEM1B	0.230417	44	0.13239	0.715397	0.610161	0.0285892	0.231289	0.130892	0.72397	0.145874	0.350626	0.886019
GPR63	0.156983	93	0.132903	0.716661	0.611239	0.0112067	0.154117	0.149297	0.745272	0.103859	0.350109	0.886019
SLC12A6	0.165246	84	0.133056	0.716661	0.611239	0.0110377	0.158759	0.162273	0.750769	0.11705	0.313948	0.875323
POLR3D	0.159492	90	0.133214	0.716661	0.611239	0.0120936	0.15553	0.162935	0.750815	0.0910427	0.41015	0.906498
ZNF18	0.146791	106	0.133217	0.716661	0.611239	0.0140782	0.141113	0.167988	0.754517	0.122985	0.235087	0.842678
GOT2	0.166085	83	0.133458	0.716661	0.611239	0.00788555	0.162438	0.144824	0.738571	0.176269	0.135762	0.786355
MARCO	0.145993	107	0.133489	0.716661	0.611239	0.00914293	0.140433	0.17007	0.756872	0.186346	0.0705897	0.705595
DDX27	0.145303	108	0.133502	0.716661	0.611239	0.0104516	0.136285	0.171992	0.757755	0.0772334	0.452097	0.916887
MDK	0.189423	64	0.133841	0.716661	0.611239	0.0395427	0.250301	0.0558732	0.618744	0.144836	0.286859	0.868131
FAM83B	0.144437	109	0.134017	0.716661	0.611239	0.00719406	0.146834	0.140841	0.732056	0.18391	0.0698707	0.702991
NEUROD2	0.210573	52	0.134027	0.716661	0.611239	0.0217642	0.257644	0.0738954	0.648069	0.22793	0.115225	0.760736
TFF1	0.16006	89	0.134046	0.716661	0.611239	0.00985119	0.157615	0.1573	0.74902	0.161718	0.15182	0.795788
FITM1	0.173428	76	0.134072	0.716661	0.611239	0.0181416	0.19169	0.106728	0.693969	0.168693	0.17237	0.807399
PITX3	0.217057	49	0.134107	0.716661	0.611239	0.03405	0.214198	0.148242	0.743103	0.162567	0.291728	0.869602
KAT2A	0.172174	77	0.134311	0.716661	0.611239	0.0144144	0.185388	0.118976	0.70976	0.100147	0.409438	0.906203
LGALS7	0.180724	70	0.134347	0.716661	0.611239	0.0164693	0.201224	0.105203	0.693969	0.199609	0.129591	0.778229
OLFR959	0.150667	100	0.134579	0.716661	0.611239	0.0150893	0.14649	0.15887	0.74902	0.107544	0.313011	0.875323
TUBA3C	0.437808	13	0.134593	0.716661	0.611239	0.0313714	0.42694	0.166296	0.7538	0.2194	0.493256	0.927606
NXPH1	0.265985	33	0.134613	0.716661	0.611239	0.0452928	0.260096	0.143791	0.736699	0.205085	0.27696	0.863065
LMBR1L	0.161676	87	0.134636	0.716661	0.611239	0.0120293	0.178467	0.106475	0.693969	0.295703	0.00814916	0.477312
OR10J3	0.149098	102	0.13475	0.716661	0.611239	0.00553335	0.169302	0.106667	0.693969	0.186987	0.0726998	0.709315
METTL7A	0.154529	95	0.134856	0.716661	0.611239	0.00828888	0.151082	0.155193	0.74902	0.155552	0.157682	0.797262
TBX10	0.155353	94	0.134876	0.716661	0.611239	0.0123443	0.187399	0.0804042	0.658646	0.197462	0.0717932	0.706425
SCN1A	0.160623	88	0.134925	0.716661	0.611239	0.0107182	0.163994	0.133681	0.727463	0.158133	0.161227	0.801396
SIX1	0.279339	30	0.134932	0.716661	0.611239	0.0211682	0.249879	0.182949	0.764489	0.349146	0.0685963	0.702212
OR5K3	0.16746	81	0.135101	0.716947	0.611484	0.0120722	0.149212	0.192287	0.768479	0.197133	0.090033	0.739005
TUSC3	0.243559	39	0.135138	0.716947	0.611484	0.0208755	0.251167	0.139509	0.731871	0.245155	0.155768	0.79713
VPS16	0.161389	87	0.13534	0.717422	0.611889	0.0143458	0.205218	0.0660816	0.645343	0.171311	0.133702	0.781419
UBE2E3	0.506246	10	0.135421	0.717647	0.61208	0.00077003	NA	NA	NA	NA	NA	NA
KLHL11	0.200143	57	0.135511	0.717926	0.612319	0.0215962	0.214306	0.116149	0.706397	0.138005	0.334168	0.880079
PTBP2	0.300611	26	0.135647	0.718014	0.612394	0.0261117	0.317886	0.121492	0.713316	0.204313	0.338242	0.880638
PTPRQ	0.142503	111	0.135701	0.718014	0.612394	0.00749868	0.136767	0.168334	0.754517	0.120875	0.233344	0.842237
GTPBP3	0.149379	101	0.135979	0.718014	0.612394	0.0117855	0.14153	0.173614	0.758445	0.177981	0.0896257	0.738904
TFF2	0.161109	87	0.136029	0.718014	0.612394	0.00850391	0.166572	0.139741	0.731871	0.150178	0.180832	0.814261
POU6F1	0.19635	59	0.136099	0.718014	0.612394	0.028721	0.233404	0.0834087	0.664566	0.226974	0.102174	0.751564
CDK5RAP1	0.154008	95	0.136192	0.718014	0.612394	0.0154044	0.153845	0.150027	0.745272	0.102115	0.349496	0.886019
C19orf35	0.177315	72	0.136206	0.718014	0.612394	0.00758605	0.200455	0.115203	0.706397	0.234742	0.0598054	0.692403
ATP6V1A	0.186804	65	0.136226	0.718014	0.612394	0.0128744	0.190098	0.135625	0.729123	0.194909	0.146251	0.793645
OR5T3	0.171302	77	0.136324	0.718014	0.612394	0.0153446	0.144534	0.222465	0.788512	0.112638	0.356799	0.887809
MTTP	0.142865	110	0.136512	0.718127	0.61249	0.00655637	0.139387	0.166633	0.754263	0.111547	0.269204	0.859827
MBD3L3	0.299973	26	0.13652	0.718127	0.61249	0.0105569	0.322867	0.123846	0.715739	0.329813	0.107384	0.753807
IL1F10	0.154605	94	0.136788	0.718127	0.61249	0.0106312	0.171501	0.108056	0.69555	0.100168	0.367585	0.891815
MANEAL	0.183615	67	0.136922	0.718127	0.61249	0.0141818	0.218964	0.0821493	0.664003	0.10805	0.403199	0.903272
OR2L8	0.239294	40	0.136977	0.718127	0.61249	0.0180524	0.221665	0.187326	0.766605	0.246538	0.147196	0.794568
GNL1	0.164553	83	0.137129	0.718127	0.61249	0.0115757	0.177379	0.122757	0.714613	0.155423	0.186071	0.816495
GAD1	0.168727	79	0.137159	0.718127	0.61249	0.0183554	0.166721	0.150023	0.745272	0.1638	0.175436	0.809304
SMARCA4	0.20492	54	0.137162	0.718127	0.61249	0.0160375	0.222684	0.120095	0.711241	0.138819	0.331298	0.879168
ATP1A3	0.151222	98	0.13718	0.718127	0.61249	0.0148921	0.15603	0.139697	0.731871	0.150788	0.163286	0.801758
PRDX2	0.180735	69	0.137243	0.718259	0.612602	0.01108	0.174074	0.168923	0.755466	0.210279	0.0953586	0.74523
RASAL2	0.180645	69	0.137441	0.7187	0.612979	0.0257727	0.183029	0.141295	0.732777	0.115334	0.372048	0.895496
KLHL32	0.186129	65	0.137675	0.719326	0.613512	0.0150793	0.203739	0.109246	0.696692	0.195301	0.138246	0.787221
FCGBP	0.15259	96	0.137758	0.719354	0.613537	0.0142561	0.146928	0.169446	0.756413	0.184895	0.088329	0.738904
RIMS1	0.144422	107	0.137767	0.719354	0.613537	0.0103507	0.157788	0.120729	0.712667	0.104409	0.308792	0.875323
SECISBP2L	0.150164	99	0.137925	0.7194	0.613576	0.0110495	0.163457	0.117452	0.708706	0.12758	0.230795	0.841679
GRIA4	0.217253	48	0.138	0.71944	0.61361	0.0390455	0.216718	0.157651	0.74902	0.122743	0.427337	0.91384
TF	0.141023	112	0.138042	0.719458	0.613625	0.00621132	0.146271	0.140398	0.731932	0.182237	0.0695725	0.702991
[truncated: 6,971 more rows]

## Sheet: ELL (PC2) Negative Correlations
	Rho	N	P	Padj	qval	SubtreeVariance	nomarineRho	nomarineP	nomarinePadj	nobatnmrRho	nobatnmrP	nobatnmrPadj
[truncated: 8,933 more rows]

[truncated: 1 more sheets: ELL (PC2) Positive Correlations]
