# Supplementary material for: Pan-mammalian analysis of molecular constraints underlying extended lifespan
Source: eLife. 2020 Feb 11;9:e51089. doi: 10.7554/eLife.51089 (PMC7012612; doi:10.7554/eLife.51089)
Supplement: Supplementary file 5. — Pathway enrichment statistics from species removal analyses for both the 3L and ELL phenotypes using MSigDB canonical pathway annotations. [file elife-51089-supp5.xlsx]

## Sheet: 3L (PC1) Negative Correlations
	realstat	realp	realpadj	SubtreeVar	nomarinestat	nomarinep	nomarinepadj	nobnmrstat	nobnmrp	nobnmrpadj
KEGG_CYTOKINE_CYTOKINE_RECEPTOR_INTERACTION	-0.181328	7.97161e-23	3.3959e-20	0.00148818	-0.187701	2.42787e-24	1.03427e-21	-0.152972	1.07054e-16	2.72989e-14
REACTOME_CELL_CYCLE	-0.126266	3.44169e-16	1.09962e-13	0.000808836	-0.125333	6.18298e-16	1.97546e-13	-0.144331	1.26309e-20	5.36814e-18
REACTOME_CELL_CYCLE_MITOTIC	-0.131694	2.35903e-14	6.02967e-12	0.000937606	-0.131323	3.07529e-14	7.86044e-12	-0.149554	4.55895e-18	1.45316e-15
REACTOME_INNATE_IMMUNE_SYSTEM	-0.115644	5.23434e-10	1.11491e-07	0.00110515	-0.118877	1.70805e-10	3.63814e-08	-0.074582	6.17088e-05	0.00191899
REACTOME_MITOTIC_PROMETAPHASE	-0.185222	1.12706e-08	1.53823e-06	0.00213948	-0.183959	1.41585e-08	1.80945e-06	-0.239059	1.70413e-13	3.62127e-11
REACTOME_IMMUNE_SYSTEM	-0.0599931	1.20362e-08	1.53823e-06	0.000192722	-0.0611145	6.78171e-09	1.08338e-06	-0.04922	2.96797e-06	0.00023651
REACTOME_DNA_REPLICATION	-0.122037	2.655e-08	2.80784e-06	0.00100243	-0.124325	1.59209e-08	1.84971e-06	-0.145937	2.88934e-11	3.68391e-09
NABA_SECRETED_FACTORS	-0.0897761	2.85618e-08	2.80784e-06	0.00046143	-0.0923316	1.14371e-08	1.62407e-06	-0.0896086	3.03249e-08	2.97418e-06
REACTOME_MITOTIC_M_M_G1_PHASES	-0.127148	4.62108e-08	4.21839e-06	0.00106893	-0.127653	4.50574e-08	4.11309e-06	-0.158436	9.75105e-12	1.3814e-09
REACTOME_RIG_I_MDA5_MEDIATED_INDUCTION_OF_IFN_ALPHA_BETA_PATHWAYS	-0.194543	6.25581e-08	5.32995e-06	0.00232944	-0.191444	1.0089e-07	8.05855e-06	-0.163129	5.6922e-06	0.000329889
REACTOME_CHEMOKINE_RECEPTORS_BIND_CHEMOKINES	-0.212821	6.69081e-08	5.34428e-06	0.00233762	-0.213385	6.17746e-08	5.26319e-06	-0.158503	5.78985e-05	0.00184551
KEGG_CELL_CYCLE	-0.137119	2.69789e-07	2.02818e-05	0.00157715	-0.135326	3.85211e-07	2.4615e-05	-0.167379	3.41978e-10	3.96384e-08
KEGG_JAK_STAT_SIGNALING_PATHWAY	-0.121982	3.51338e-07	2.4945e-05	0.00100443	-0.121886	3.58898e-07	2.41406e-05	-0.110714	3.78146e-06	0.000253756
PID_FANCONI_PATHWAY	-0.211818	6.96693e-07	4.45187e-05	0.00242222	-0.212498	6.41774e-07	3.90565e-05	-0.198863	3.18101e-06	0.000238576
KEGG_RIG_I_LIKE_RECEPTOR_SIGNALING_PATHWAY	-0.169287	8.67546e-07	5.27964e-05	0.00216227	-0.169204	8.78299e-07	5.10212e-05	-0.148513	1.5901e-05	0.000724065
NABA_MATRISOME_ASSOCIATED	-0.0549696	1.03293e-06	6.00041e-05	0.000390618	-0.0596763	1.13709e-07	8.54822e-06	-0.0352299	0.00174344	0.0222288
NABA_MATRISOME	-0.0467934	1.67064e-06	8.89614e-05	0.000369584	-0.0513861	1.44489e-07	1.02588e-05	-0.0275527	0.0048021	0.0429687
REACTOME_PEPTIDE_LIGAND_BINDING_RECEPTORS	-0.101174	3.53196e-06	0.000180554	0.000875461	-0.103668	2.0197e-06	0.000107549	-0.0853834	9.10077e-05	0.00245245
REACTOME_EXTRINSIC_PATHWAY_FOR_APOPTOSIS	-0.36976	3.94329e-06	0.000193828	0.00760532	-0.350321	1.2325e-05	0.000525043	-0.334055	3.06252e-05	0.00118325
BIOCARTA_DEATH_PATHWAY	-0.234519	4.511e-06	0.00021352	0.00410753	-0.239481	2.82203e-06	0.000138713	-0.153028	0.00276551	0.0293836
BIOCARTA_ATRBRCA_PATHWAY	-0.284617	6.41969e-06	0.000282909	0.00360394	-0.296186	2.65983e-06	0.00013597	-0.247594	8.66805e-05	0.00241985
KEGG_CHEMOKINE_SIGNALING_PATHWAY	-0.0979604	7.54824e-06	0.000321555	0.00063584	-0.0856977	8.96325e-05	0.00238646	-0.0679134	0.0019081	0.023016
REACTOME_FANCONI_ANEMIA_PATHWAY	-0.293686	9.46143e-06	0.000390055	0.00430108	-0.319046	1.49731e-06	8.31981e-05	-0.277095	2.92889e-05	0.00116698
PID_ATR_PATHWAY	-0.203243	1.49289e-05	0.000578156	0.00200975	-0.205444	1.20547e-05	0.000525043	-0.23604	4.94635e-07	4.2044e-05
KEGG_CYTOSOLIC_DNA_SENSING_PATHWAY	-0.167047	1.89596e-05	0.000692296	0.00355314	-0.168957	1.52049e-05	0.000614741	-0.121545	0.00185935	0.0229555
REACTOME_G2_M_CHECKPOINTS	-0.191346	2.30245e-05	0.000817368	0.00190605	-0.192445	2.06588e-05	0.000754341	-0.191208	2.33398e-05	0.00099194
REACTOME_G1_PHASE	-0.21637	4.1755e-05	0.00136828	0.0034888	-0.215741	4.39564e-05	0.00133753	-0.217547	3.79155e-05	0.00130655
KEGG_TOLL_LIKE_RECEPTOR_SIGNALING_PATHWAY	-0.117976	4.47454e-05	0.00141907	0.00157105	-0.121829	2.5002e-05	0.000887572	-0.0787202	0.0064616	0.0545599
BIOCARTA_HIVNEF_PATHWAY	-0.157843	4.55257e-05	0.00141907	0.00240907	-0.155559	5.8578e-05	0.00164668	-0.109546	0.00465717	0.0421127
BIOCARTA_NKT_PATHWAY	-0.217897	4.96308e-05	0.0015102	0.00477897	-0.21566	5.92702e-05	0.00164668	-0.151386	0.00481923	0.0429687
PID_PLK1_PATHWAY	-0.179884	5.63126e-05	0.00167366	0.00293244	-0.180727	5.19623e-05	0.00150927	-0.229703	2.70059e-07	2.45947e-05
REACTOME_TRAF6_MEDIATED_IRF7_ACTIVATION	-0.211286	6.30062e-05	0.00182489	0.0060875	-0.218542	3.49331e-05	0.00117485	-0.173432	0.00102205	0.0153308
PID_HIV_NEF_PATHWAY	-0.193562	7.55457e-05	0.00202029	0.00434931	-0.190651	9.67617e-05	0.0025237	-0.141257	0.00387047	0.0373852
REACTOME_CDC6_ASSOCIATION_WITH_THE_ORC_ORIGIN_COMPLEX	-0.344927	7.49493e-05	0.00202029	0.00702368	-0.357582	4.03811e-05	0.00129018	-0.354461	4.71237e-05	0.00158112
KEGG_SMALL_CELL_LUNG_CANCER	-0.124576	8.33515e-05	0.00217394	0.000952057	-0.120034	0.00014999	0.00354976	-0.0964233	0.00232387	0.0262207
REACTOME_CYTOKINE_SIGNALING_IN_IMMUNE_SYSTEM	-0.0716151	9.08421e-05	0.00232192	0.000258919	-0.0733614	6.09203e-05	0.00165651	-0.0562486	0.00211219	0.0249355
REACTOME_MITOTIC_G1_G1_S_PHASES	-0.103005	9.79363e-05	0.00245417	0.000853648	-0.102794	0.00010804	0.00270735	-0.110687	2.83733e-05	0.00116697
REACTOME_CHROMOSOME_MAINTENANCE	-0.113028	0.000108	0.00265432	0.000769563	-0.108877	0.000191724	0.00432351	-0.117017	6.65027e-05	0.00201883
PID_BCR_5PATHWAY	-0.138496	0.000116996	0.00282114	0.00173045	-0.113847	0.00154167	0.021655	-0.10698	0.00292335	0.030303
REACTOME_ACTIVATION_OF_ATR_IN_RESPONSE_TO_REPLICATION_STRESS	-0.18677	0.000133874	0.00316836	0.00182788	-0.185405	0.000149861	0.00354976	-0.173759	0.000380656	0.00765336
PID_IL23_PATHWAY	-0.177684	0.000187472	0.00435616	0.00174696	-0.174772	0.000238686	0.00508401	-0.114989	0.0156352	0.0967715
REACTOME_ASSOCIATION_OF_LICENSING_FACTORS_WITH_THE_PRE_REPLICATIVE_COMPLEX	-0.322522	0.000213248	0.00486662	0.00659607	-0.339102	9.89628e-05	0.00252949	-0.326148	0.000180819	0.0043499
REACTOME_MITOTIC_G2_G2_M_PHASES	-0.123417	0.000228454	0.00512218	0.00157045	-0.123444	0.000227749	0.00493329	-0.154144	4.16938e-06	0.000264047
BIOCARTA_TALL1_PATHWAY	-0.282259	0.000257046	0.00566387	0.00559531	-0.287903	0.000192832	0.00432351	-0.23343	0.00250428	0.027059
REACTOME_DEFENSINS	-0.168809	0.000269531	0.00583268	0.00390573	-0.174917	0.000160156	0.00372144	-0.135662	0.00341572	0.0340237
REACTOME_GPCR_LIGAND_BINDING	-0.0540319	0.000337231	0.00706527	0.000464579	-0.0529576	0.0004422	0.00831075	-0.0364529	0.015585	0.0967715
BIOCARTA_CYTOKINE_PATHWAY	-0.224845	0.000364549	0.00751441	0.00209218	-0.228996	0.000283086	0.00593089	-0.16832	0.00762126	0.0599448
BIOCARTA_NFKB_PATHWAY	-0.212295	0.000428737	0.00869724	0.00427966	-0.209204	0.000519581	0.00962355	-0.129311	0.0319428	0.147562
REACTOME_COMPLEMENT_CASCADE	-0.189008	0.000543326	0.0105208	0.00751534	-0.193438	0.000400921	0.0080059	-0.0627654	0.250777	0.510461
PID_RHOA_REG_PATHWAY	-0.15208	0.000570431	0.0105654	0.00366703	-0.143845	0.00111917	0.0174427	-0.099798	0.0237678	0.122384
REACTOME_BETA_DEFENSINS	-0.168622	0.000564526	0.0105654	0.00424844	-0.180472	0.000223885	0.00493319	-0.129014	0.00833552	0.0636394
PID_IL27_PATHWAY	-0.194501	0.000603796	0.0110236	0.00183472	-0.200131	0.000416851	0.00819594	-0.167839	0.00307905	0.0316596
PID_EPO_PATHWAY	-0.172347	0.000620415	0.0111675	0.00326725	-0.145694	0.00381295	0.0416491	-0.117691	0.0194317	0.109143
KEGG_PATHWAYS_IN_CANCER	-0.05605	0.000662952	0.0117674	0.000405348	-0.0519195	0.00161315	0.0224087	-0.057547	0.000473517	0.00865731
KEGG_HOMOLOGOUS_RECOMBINATION	-0.188638	0.000699769	0.0120852	0.00276464	-0.195805	0.000434074	0.0082798	-0.142138	0.0106466	0.0749653
BIOCARTA_TH1TH2_PATHWAY	-0.222601	0.000787692	0.0134223	0.00472482	-0.237694	0.000337453	0.00695588	-0.167396	0.0115852	0.0782422
REACTOME_NUCLEAR_SIGNALING_BY_ERBB4	-0.160325	0.000884975	0.0148816	0.0022385	-0.161498	0.000810868	0.0140039	-0.115776	0.0163546	0.0991988
REACTOME_E2F_ENABLED_INHIBITION_OF_PRE_REPLICATION_COMPLEX_FORMATION	-0.302987	0.000910473	0.0151115	0.00689137	-0.324038	0.000389243	0.00789608	-0.339853	0.000198911	0.00469651
PID_IGF1_PATHWAY	-0.177622	0.000941606	0.0152889	0.00353232	-0.147686	0.00595994	0.0501106	-0.177994	0.000918598	0.0146402
REACTOME_PRE_NOTCH_TRANSCRIPTION_AND_TRANSLATION	-0.198531	0.000989837	0.015427	0.00607704	-0.185872	0.00204645	0.0275302	-0.218888	0.000282215	0.00589876
BIOCARTA_TOLL_PATHWAY	-0.155865	0.00105048	0.0161172	0.00160952	-0.16739	0.000433318	0.0082798	-0.101101	0.0335552	0.152796
BIOCARTA_G1_PATHWAY	-0.177778	0.00114214	0.0171724	0.00402049	-0.186465	0.000645138	0.0116125	-0.17422	0.00143342	0.0194427
REACTOME_CLASS_A1_RHODOPSIN_LIKE_RECEPTORS	-0.0557286	0.00126791	0.0180579	0.000617655	-0.0564842	0.00108774	0.0173169	-0.0299092	0.0836648	0.270904
BIOCARTA_RELA_PATHWAY	-0.230897	0.0013931	0.0191439	0.00427122	-0.212689	0.00323967	0.0379843	-0.196115	0.00663506	0.0554206
BIOCARTA_NO2IL12_PATHWAY	-0.223525	0.00142735	0.0194059	0.00817001	-0.231251	0.000969305	0.016088	-0.115587	0.099128	0.295991
BIOCARTA_CELLCYCLE_PATHWAY	-0.191585	0.00148207	0.0195266	0.00461339	-0.195999	0.0011484	0.0174721	-0.199516	0.000933838	0.0146898
BIOCARTA_RB_PATHWAY	-0.254865	0.00147	0.0195266	0.00629438	-0.265837	0.000908418	0.0152758	-0.266864	0.000867616	0.0141822
REACTOME_ACTIVATION_OF_THE_PRE_REPLICATIVE_COMPLEX	-0.167955	0.00146929	0.0195266	0.0021119	-0.165979	0.00167083	0.0229605	-0.11369	0.0313177	0.146264
PID_IL4_2PATHWAY	-0.115068	0.0016247	0.0209734	0.000565849	-0.10392	0.00442543	0.0434178	-0.104531	0.00419834	0.0402472
KEGG_INTESTINAL_IMMUNE_NETWORK_FOR_IGA_PRODUCTION	-0.133685	0.00173707	0.0221998	0.00193	-0.14032	0.00101161	0.0165749	-0.0724718	0.089546	0.282542
KEGG_UBIQUITIN_MEDIATED_PROTEOLYSIS	-0.0834558	0.00182394	0.0228529	0.00117946	-0.093552	0.000529625	0.00966944	-0.121168	6.56711e-06	0.000348878
BIOCARTA_LECTIN_PATHWAY	-0.271681	0.00181412	0.0228529	0.0113337	-0.294444	0.000723763	0.0126708	-0.0779117	0.371065	0.617845
REACTOME_TRAF6_MEDIATED_NFKB_ACTIVATION	-0.194772	0.00201676	0.0247828	0.00245545	-0.199751	0.00154195	0.021655	-0.152771	0.0154399	0.0964994
BIOCARTA_TNFR2_PATHWAY	-0.20888	0.00216709	0.025836	0.00378103	-0.209413	0.002111	0.0281027	-0.161453	0.0177829	0.102648
PID_CD8_TCR_DOWNSTREAM_PATHWAY	-0.111008	0.00218333	0.025836	0.00194508	-0.107604	0.00297676	0.0358345	-0.0739094	0.041343	0.176295
BIOCARTA_SODD_PATHWAY	-0.279459	0.00221884	0.0260154	0.00622048	-0.259985	0.00442612	0.0434178	-0.222549	0.01484	0.0932068
REACTOME_PEPTIDE_HORMONE_BIOSYNTHESIS	-0.233768	0.00246832	0.0284191	0.00337362	-0.236149	0.00222801	0.0293546	-0.273751	0.00039267	0.00765336
BIOCARTA_RACCYCD_PATHWAY	-0.174614	0.00253119	0.0288396	0.00282592	-0.159649	0.00576601	0.0488931	-0.161387	0.00525682	0.0461853
REACTOME_G_ALPHA_I_SIGNALLING_EVENTS	-0.0647803	0.00254998	0.0288396	0.000854057	-0.0586957	0.00625874	0.051405	-0.0344223	0.108867	0.310937
REACTOME_CLASS_B_2_SECRETIN_FAMILY_RECEPTORS	-0.0963365	0.00264198	0.029618	0.000963054	-0.0875727	0.00627479	0.051405	-0.106535	0.0008846	0.0142768
BIOCARTA_COMP_PATHWAY	-0.202828	0.00290625	0.0320188	0.00939342	-0.232067	0.0006575	0.0116706	-0.0241318	0.723151	0.869828
PID_TELOMERASE_PATHWAY	-0.106277	0.00289538	0.0320188	0.00110156	-0.0923035	0.00968209	0.0701536	-0.106429	0.00285559	0.0298506
PID_IL2_STAT5_PATHWAY	-0.156944	0.00295725	0.0323022	0.00233747	-0.126283	0.0167791	0.10115	-0.142887	0.00681109	0.0556848
ST_TUMOR_NECROSIS_FACTOR_PATHWAY	-0.159264	0.00302118	0.0327209	0.00258239	-0.15964	0.00295314	0.0358345	-0.128106	0.0170605	0.10024
PID_FCER1_PATHWAY	-0.109669	0.00311768	0.0334526	0.00174495	-0.0946246	0.0107604	0.075111	-0.0955597	0.010007	0.0729082
REACTOME_GLUCAGON_TYPE_LIGAND_RECEPTORS	-0.161418	0.00314108	0.0334526	0.00280042	-0.156237	0.00425269	0.0430762	-0.122544	0.0249438	0.12521
REACTOME_RECRUITMENT_OF_MITOTIC_CENTROSOME_PROTEINS_AND_COMPLEXES	-0.109903	0.00330356	0.0343247	0.00159947	-0.107649	0.00400547	0.0429296	-0.137133	0.000246462	0.00541792
BIOCARTA_INFLAM_PATHWAY	-0.157631	0.00333371	0.0343588	0.00129328	-0.166428	0.00194193	0.026402	-0.116001	0.0307735	0.145319
REACTOME_FACTORS_INVOLVED_IN_MEGAKARYOCYTE_DEVELOPMENT_AND_PLATELET_PRODUCTION	-0.0796446	0.00344465	0.0349386	0.000738086	-0.0798036	0.00352157	0.0387979	-0.0915057	0.000819843	0.0135753
BIOCARTA_CD40_PATHWAY	-0.217491	0.00355576	0.0352269	0.00334734	-0.205946	0.005774	0.0488931	-0.193153	0.00962865	0.0713752
PID_P53_REGULATION_PATHWAY	-0.114206	0.00376238	0.0364266	0.00142999	-0.111545	0.0046564	0.0444095	-0.132929	0.000745128	0.0127126
BIOCARTA_STRESS_PATHWAY	-0.167393	0.00379503	0.0364665	0.00258096	-0.162639	0.00491571	0.0461932	-0.144056	0.0127327	0.0828277
REACTOME_GLYCOPROTEIN_HORMONES	-0.239531	0.0040777	0.0386022	0.00410743	-0.23844	0.00424981	0.0430762	-0.268601	0.001279	0.01792
REACTOME_NFKB_ACTIVATION_THROUGH_FADD_RIP1_PATHWAY_MEDIATED_BY_CASPASE_8_AND10	-0.23896	0.00416698	0.0391574	0.00713618	-0.231352	0.00553688	0.0488931	-0.144398	0.0833807	0.270904
REACTOME_G_ALPHA1213_SIGNALLING_EVENTS	-0.10071	0.00476358	0.0441149	0.00193407	-0.0848548	0.0173965	0.103891	-0.0707021	0.0475287	0.193575
KEGG_BLADDER_CANCER	-0.125936	0.00480526	0.0441766	0.00177839	-0.124925	0.0051551	0.0477407	-0.106853	0.0167331	0.0992312
PID_FOXM1_PATHWAY	-0.128747	0.00489847	0.0443989	0.00215919	-0.133909	0.00342869	0.0384375	-0.162165	0.000394212	0.00765336
ST_FAS_SIGNALING_PATHWAY	-0.1026	0.00495468	0.0445922	0.000951176	-0.107307	0.00329407	0.0382711	-0.0937334	0.0102544	0.0742298
REACTOME_CELL_DEATH_SIGNALLING_VIA_NRAGE_NRIF_AND_NADE	-0.108633	0.00501188	0.0447915	0.00281111	-0.0990922	0.0104736	0.0736995	-0.0990044	0.0105422	0.0746738
BIOCARTA_CLASSIC_PATHWAY	-0.22393	0.00519809	0.046133	0.0124703	-0.258992	0.00122911	0.0184801	-0.0343216	0.668426	0.834714
REACTOME_DNA_REPAIR	-0.082251	0.00528166	0.0462327	0.000763234	-0.0874271	0.00302827	0.0358345	-0.0734835	0.012703	0.0828277
REACTOME_E2F_MEDIATED_REGULATION_OF_DNA_REPLICATION	-0.142737	0.00524795	0.0462327	0.002882	-0.145443	0.00445049	0.0434178	-0.15001	0.00335011	0.0338999
BIOCARTA_DC_PATHWAY	-0.170484	0.00567247	0.0479708	0.00380048	-0.185494	0.00261531	0.0337613	-0.0667314	0.278929	0.529085
BIOCARTA_IL22BP_PATHWAY	-0.200003	0.00563249	0.0479708	0.00332078	-0.193209	0.00748639	0.0590593	-0.134535	0.0625701	0.230569
SA_REG_CASCADE_OF_CYCLIN_EXPR	-0.230746	0.00566187	0.0479708	0.00621216	-0.235243	0.00479234	0.0453675	-0.281176	0.000747801	0.0127126
PID_NFKAPPAB_CANONICAL_PATHWAY	-0.174366	0.00570544	0.0479708	0.00381504	-0.174145	0.00576712	0.0488931	-0.139214	0.027316	0.133954
REACTOME_NRAGE_SIGNALS_DEATH_THROUGH_JNK	-0.122133	0.00565994	0.0479708	0.00326801	-0.105043	0.0173273	0.103891	-0.0977892	0.0267358	0.132124
PID_BARD1_PATHWAY	-0.150122	0.00601622	0.0502531	0.00265182	-0.156342	0.00422695	0.0430762	-0.165276	0.00249307	0.027059
PID_CASPASE_PATHWAY	-0.108996	0.00665011	0.0544797	0.00141903	-0.114804	0.00425651	0.0430762	-0.0687579	0.0899703	0.282542
KEGG_PRIMARY_IMMUNODEFICIENCY	-0.13228	0.00683137	0.0556082	0.00181893	-0.135194	0.00570034	0.0488931	-0.0817543	0.0945697	0.286712
BIOCARTA_FAS_PATHWAY	-0.142476	0.00697247	0.0560428	0.00188179	-0.132429	0.0121456	0.0808442	-0.122596	0.02025	0.110979
KEGG_APOPTOSIS	-0.0862876	0.00708188	0.0563487	0.00105963	-0.083162	0.00944782	0.0693926	-0.0577278	0.0716037	0.246295
BIOCARTA_ATM_PATHWAY	-0.173869	0.00714279	0.0563487	0.00277915	-0.181409	0.00500409	0.0466805	-0.153374	0.0176439	0.102648
PID_TRAIL_PATHWAY	-0.149784	0.00711338	0.0563487	0.00199779	-0.143685	0.00982589	0.0701536	-0.145285	0.00903716	0.0677787
REACTOME_P75_NTR_RECEPTOR_MEDIATED_SIGNALLING	-0.0892522	0.00730433	0.0572695	0.0021107	-0.0796348	0.0166856	0.10115	-0.0734462	0.0272756	0.133954
PID_LYSOPHOSPHOLIPID_PATHWAY	-0.0970829	0.00736814	0.0574176	0.00186532	-0.0725826	0.0451285	0.20598	-0.0626157	0.0839272	0.270904
REACTOME_CYCLIN_A_B1_ASSOCIATED_EVENTS_DURING_G2_M_TRANSITION	-0.198873	0.00768621	0.0591745	0.0048854	-0.207482	0.00542015	0.0487814	-0.228616	0.00218248	0.0255291
BIOCARTA_IL12_PATHWAY	-0.164159	0.00773286	0.0591772	0.00333083	-0.170117	0.00577688	0.0488931	-0.0959745	0.119422	0.328001
KEGG_PROSTATE_CANCER	-0.0822505	0.0078549	0.0597533	0.000738814	-0.0673229	0.0295708	0.153002	-0.0944776	0.00226269	0.0257583
PID_TOLL_ENDOGENOUS_PATHWAY	-0.156223	0.00811756	0.0603153	0.0027903	-0.16413	0.00541718	0.0487814	-0.0828576	0.160322	0.389301
REACTOME_INTERFERON_ALPHA_BETA_SIGNALING	-0.0974438	0.00810514	0.0603153	0.00223482	-0.105742	0.00406454	0.0429296	-0.0587333	0.110524	0.31317
REACTOME_EXTENSION_OF_TELOMERES	-0.147535	0.00802354	0.0603153	0.0024579	-0.135928	0.0145859	0.0927402	-0.0929474	0.0948831	0.286712
REACTOME_INFLUENZA_LIFE_CYCLE	-0.0791905	0.0081889	0.0604937	0.00142392	-0.0712846	0.0179018	0.106096	-0.111171	0.000222124	0.00505728
BIOCARTA_PTC1_PATHWAY	-0.229387	0.00845031	0.0620661	0.00268195	-0.236073	0.00672266	0.054035	-0.247006	0.00457121	0.0421127
BIOCARTA_G2_PATHWAY	-0.153469	0.00930944	0.0657319	0.00216292	-0.163742	0.00552808	0.0488931	-0.16705	0.00464612	0.0421127
PID_BETA_CATENIN_NUC_PATHWAY	-0.08615	0.00915485	0.0657319	0.000781837	-0.0878841	0.00784502	0.0603974	-0.127746	0.000111284	0.00283774
PID_KIT_PATHWAY	-0.10454	0.00924299	0.0657319	0.00140521	-0.077662	0.0531506	0.228709	-0.0881493	0.0281768	0.136081
REACTOME_SIGNALING_BY_ERBB4	-0.08287	0.00927168	0.0657319	0.00110767	-0.0727159	0.0224274	0.125711	-0.0700135	0.0279348	0.135425
REACTOME_REGULATORY_RNA_PATHWAYS	-0.193377	0.00954498	0.0670246	0.00420628	-0.180765	0.0153996	0.0963659	-0.222542	0.00285629	0.0298506
REACTOME_CELL_CYCLE_CHECKPOINTS	-0.0734091	0.00963041	0.067255	0.00122862	-0.0726124	0.0108141	0.075111	-0.104447	0.000230161	0.00514833
PID_IL2_PI3K_PATHWAY	-0.128152	0.00979482	0.0680314	0.00201834	-0.103697	0.0366108	0.17723	-0.136799	0.00582829	0.0505515
PID_CERAMIDE_PATHWAY	-0.107433	0.0101502	0.0697418	0.0011737	-0.103756	0.0130399	0.0845941	-0.104192	0.0126631	0.0828277
PID_CD40_PATHWAY	-0.133059	0.0104276	0.070739	0.00170869	-0.138116	0.00784505	0.0603974	-0.118718	0.022298	0.118321
PID_IL12_2PATHWAY	-0.0942248	0.0104614	0.070739	0.00127671	-0.0957162	0.00930319	0.0691249	-0.0362207	0.32504	0.572412
REACTOME_G_ALPHA_Q_SIGNALLING_EVENTS	-0.0565342	0.0108239	0.0727795	0.000689226	-0.0514497	0.0203884	0.115806	-0.0355354	0.109206	0.310937
BIOCARTA_PARKIN_PATHWAY	-0.230701	0.0115531	0.0762196	0.00327699	-0.220007	0.016021	0.0989121	-0.206005	0.0241238	0.123526
PID_RB_1PATHWAY	-0.0921284	0.0116298	0.0762196	0.00191943	-0.0911362	0.0125602	0.0827419	-0.12704	0.000502699	0.00902735
BIOCARTA_TNFR1_PATHWAY	-0.135227	0.0118022	0.0764212	0.00272155	-0.121261	0.0239491	0.130799	-0.122096	0.022997	0.120663
REACTOME_INTERFERON_SIGNALING	-0.0599635	0.0117207	0.0764212	0.00050996	-0.0633491	0.00775091	0.0603974	-0.049084	0.0391008	0.170659
REACTOME_G_ALPHA_S_SIGNALLING_EVENTS	-0.0686757	0.0120314	0.0772668	0.000522182	-0.065872	0.0160099	0.0989121	-0.0633105	0.0206118	0.11183
KEGG_AUTOIMMUNE_THYROID_DISEASE	-0.101508	0.0123083	0.0784373	0.00344139	-0.112138	0.00568682	0.0488931	-0.0671736	0.0976233	0.292795
BIOCARTA_HSP27_PATHWAY	-0.186053	0.0126414	0.079374	0.00306365	-0.192747	0.00978223	0.0701536	-0.184571	0.0168433	0.0994223
REACTOME_G_PROTEIN_ACTIVATION	-0.15351	0.0127479	0.0794724	0.00195593	-0.149241	0.0154578	0.0963659	-0.115371	0.0612174	0.226238
REACTOME_G1_S_TRANSITION	-0.072146	0.0134572	0.0830835	0.000595924	-0.0735935	0.0121279	0.0808442	-0.0779577	0.0075737	0.0599448
REACTOME_PROLACTIN_RECEPTOR_SIGNALING	-0.205594	0.0136951	0.0841459	0.00434787	-0.212122	0.0109767	0.0758281	-0.168526	0.0433108	0.182249
REACTOME_SIGNAL_ATTENUATION	-0.20543	0.0137701	0.0842019	0.00475085	-0.154902	0.0632621	0.258304	-0.209181	0.0121356	0.0810099
REACTOME_HEMOSTASIS	-0.0353895	0.0139756	0.0850514	0.000183706	-0.0345117	0.0166568	0.10115	-0.0265444	0.0655538	0.234778
REACTOME_MYOGENESIS	-0.138675	0.0144676	0.0876284	0.00293744	-0.128175	0.0238037	0.130563	-0.159537	0.0049032	0.0434138
REACTOME_LOSS_OF_NLP_FROM_MITOTIC_CENTROSOMES	-0.0964502	0.0153362	0.0924513	0.00152349	-0.102846	0.00973498	0.0701536	-0.124838	0.00170176	0.0221402
ST_GAQ_PATHWAY	-0.132083	0.0156566	0.0939398	0.00211532	-0.137722	0.0117354	0.0800742	-0.0999009	0.0675555	0.24013
REACTOME_RIP_MEDIATED_NFKB_ACTIVATION_VIA_DAI	-0.163365	0.0164769	0.097942	0.00247491	-0.172444	0.011359	0.0780473	-0.114607	0.0924883	0.284837
REACTOME_TOLL_RECEPTOR_CASCADES	-0.0666837	0.0166008	0.0982214	0.000292968	-0.0749072	0.00712759	0.0569316	-0.0456764	0.100842	0.299704
NABA_BASEMENT_MEMBRANES	-0.109531	0.0166799	0.0982347	0.00373054	-0.130604	0.00431436	0.0430762	-0.0537792	0.239881	0.501391
PID_SHP2_PATHWAY	-0.092293	0.0171182	0.100138	0.00119498	-0.0790568	0.041129	0.190445	-0.0978093	0.0115157	0.0782422
PID_HES_HEY_PATHWAY	-0.0984401	0.018499	0.106494	0.00141628	-0.0727577	0.0816938	0.298299	-0.111323	0.0077279	0.0600797
PID_E2F_PATHWAY	-0.0796772	0.018898	0.10782	0.00170139	-0.089968	0.00803188	0.0609153	-0.124178	0.000253533	0.00547888
KEGG_MELANOMA	-0.0809806	0.0194479	0.109296	0.00106743	-0.0771661	0.0259639	0.13942	-0.101513	0.00339702	0.0340237
REACTOME_HS_GAG_DEGRADATION	-0.151128	0.0193742	0.109296	0.00352044	-0.159151	0.0138015	0.0886347	-0.0843436	0.191905	0.441658
REACTOME_NEGATIVE_REGULATORS_OF_RIG_I_MDA5_SIGNALING	-0.140809	0.0194989	0.109296	0.00171624	-0.128431	0.0331282	0.166031	-0.111561	0.0642164	0.232602
REACTOME_SIGNALING_BY_ILS	-0.0669949	0.0198559	0.11033	0.00031849	-0.0644459	0.0250628	0.135669	-0.0460947	0.109054	0.310937
BIOCARTA_IL6_PATHWAY	-0.143379	0.0199993	0.110645	0.00196196	-0.119403	0.0527037	0.228558	-0.164385	0.0076491	0.0599448
REACTOME_MEIOSIS	-0.0738041	0.0204913	0.112394	0.00121814	-0.0757228	0.0181159	0.106692	-0.0763993	0.0177923	0.102648
SA_CASPASE_CASCADE	-0.153509	0.0206077	0.11255	0.00352793	-0.169686	0.0104955	0.0736995	-0.0763516	0.249538	0.509873
REACTOME_TRAF3_DEPENDENT_IRF_ACTIVATION_PATHWAY	-0.176721	0.0221103	0.119733	0.00357604	-0.188833	0.0144728	0.0924812	-0.113431	0.141865	0.361978
BIOCARTA_RNA_PATHWAY	-0.20863	0.0223779	0.120671	0.00327921	-0.198469	0.0298067	0.1536	-0.136679	0.134593	0.355787
BIOCARTA_PML_PATHWAY	-0.159217	0.0231125	0.123158	0.0030732	-0.146691	0.0363619	0.176968	-0.107283	0.125864	0.339275
PID_S1P_S1P3_PATHWAY	-0.12413	0.0231283	0.123158	0.00211882	-0.117049	0.0322144	0.163734	-0.143923	0.0084518	0.0641431
PID_P73PATHWAY	-0.0747819	0.0236783	0.125564	0.000706387	-0.0688905	0.0371534	0.179178	-0.0970881	0.00331295	0.0337921
KEGG_OOCYTE_MEIOSIS	-0.0661327	0.024189	0.127742	0.000530725	-0.0541787	0.0647971	0.262065	-0.0919518	0.00172366	0.0221986
REACTOME_ADP_SIGNALLING_THROUGH_P2RY1	-0.14476	0.025108	0.132049	0.00485336	-0.128803	0.0462791	0.208992	-0.152877	0.0180145	0.103224
REACTOME_REGULATION_OF_HYPOXIA_INDUCIBLE_FACTOR_HIF_BY_OXYGEN	-0.161652	0.0252483	0.132243	0.00250279	-0.16543	0.022028	0.124017	-0.166337	0.0213106	0.114164
REACTOME_REGULATION_OF_COMPLEMENT_CASCADE	-0.186105	0.0256493	0.133795	0.00921129	-0.189542	0.0230443	0.127492	-0.095581	0.251771	0.510461
KEGG_ALLOGRAFT_REJECTION	-0.107294	0.0260804	0.135043	0.00224756	-0.120148	0.0127176	0.0833495	-0.0579256	0.229661	0.491951
PID_ANGIOPOIETIN_RECEPTOR_PATHWAY	-0.0911084	0.0260999	0.135043	0.00135698	-0.081182	0.0474423	0.212741	-0.0949901	0.0203679	0.110979
PID_PTP1B_PATHWAY	-0.0901046	0.0277919	0.141578	0.000598029	-0.0831495	0.0423186	0.195246	-0.105062	0.0103048	0.0742298
PID_IL6_7_PATHWAY	-0.0939089	0.0278061	0.141578	0.00102301	-0.0780907	0.0673347	0.265206	-0.129554	0.00240478	0.0268955
REACTOME_TRANSPORT_OF_MATURE_MRNA_DERIVED_FROM_AN_INTRONLESS_TRANSCRIPT	-0.111184	0.0296793	0.149331	0.00273454	-0.111936	0.0285933	0.149763	-0.16613	0.00115854	0.0167856
REACTOME_TRANSCRIPTION	-0.0504277	0.0312405	0.155329	0.0013655	-0.0399431	0.0900177	0.316922	-0.0779043	0.000944755	0.0146898
REACTOME_IL_6_SIGNALING	-0.196866	0.0311532	0.155329	0.00223624	-0.200894	0.0278633	0.14654	-0.178627	0.0505302	0.200704
BIOCARTA_IL1R_PATHWAY	-0.108166	0.0317137	0.156279	0.00131071	-0.114684	0.0227611	0.126472	-0.0683801	0.174491	0.413681
REACTOME_REGULATION_OF_IFNA_SIGNALING	-0.126707	0.0317939	0.156279	0.00536432	-0.122402	0.0380742	0.180506	-0.106832	0.0702623	0.243436
REACTOME_THROMBOXANE_SIGNALLING_THROUGH_TP_RECEPTOR	-0.146135	0.0319331	0.156362	0.00301646	-0.125698	0.0650037	0.262065	-0.110573	0.104549	0.306436
KEGG_COMPLEMENT_AND_COAGULATION_CASCADES	-0.0752609	0.0322906	0.157509	0.00326317	-0.0963086	0.0061535	0.0510661	0.00201112	0.954381	0.983811
BIOCARTA_AKT_PATHWAY	-0.134662	0.0327762	0.15927	0.00243311	-0.123838	0.0496204	0.219429	-0.119398	0.0583798	0.218924
PID_HIF1A_PATHWAY	-0.153934	0.0331095	0.16028	0.00336151	-0.153691	0.0333883	0.166421	-0.133232	0.0651544	0.234005
PID_IL3_PATHWAY	-0.125588	0.0333344	0.16076	0.00249048	-0.110528	0.0610886	0.254304	-0.144703	0.0142092	0.0901331
BIOCARTA_ERYTH_PATHWAY	-0.15779	0.0344378	0.165457	0.00330612	-0.165612	0.0264359	0.140187	-0.134024	0.0724371	0.248272
SA_G1_AND_S_PHASES	-0.176176	0.034649	0.165848	0.00696286	-0.185223	0.0263575	0.140187	-0.232594	0.00528867	0.0461853
PID_MYC_PATHWAY	-0.124423	0.0350056	0.16693	0.0028337	-0.0926761	0.116332	0.361732	-0.138974	0.0185298	0.105002
PID_MYC_ACTIV_PATHWAY	-0.0712173	0.03588	0.169832	0.0013312	-0.0621496	0.0670837	0.265206	-0.0963277	0.00453828	0.0421127
REACTOME_PROCESSIVE_SYNTHESIS_ON_THE_LAGGING_STRAND	-0.155496	0.0371463	0.175177	0.00401215	-0.152895	0.0404331	0.18859	-0.0869446	0.243881	0.503304
PID_CMYB_PATHWAY	-0.0659172	0.0396646	0.183992	0.000628864	-0.0592511	0.0644328	0.262065	-0.0476949	0.136616	0.357053
REACTOME_PRE_NOTCH_EXPRESSION_AND_PROCESSING	-0.0964643	0.0398793	0.183992	0.00249442	-0.0850815	0.0699085	0.269919	-0.145976	0.00187245	0.0229555
REACTOME_TRANSPORT_OF_RIBONUCLEOPROTEINS_INTO_THE_HOST_NUCLEUS	-0.114391	0.039829	0.183992	0.00309439	-0.111159	0.0457786	0.208203	-0.181421	0.00111418	0.0165183
REACTOME_RNA_POL_III_TRANSCRIPTION	-0.106434	0.0404808	0.186095	0.00275645	-0.0882887	0.0892225	0.31499	-0.131	0.0116794	0.0783749
SIG_BCR_SIGNALING_PATHWAY	-0.0866812	0.0422866	0.193008	0.00188817	-0.0652629	0.126285	0.381543	-0.0409763	0.337079	0.58473
PID_HEDGEHOG_2PATHWAY	-0.124962	0.042607	0.193779	0.00233351	-0.113162	0.0663457	0.265206	-0.152882	0.0131184	0.0841342
BIOCARTA_CASPASE_PATHWAY	-0.121762	0.0433954	0.195969	0.00335169	-0.137518	0.0225333	0.125754	-0.034195	0.57054	0.780514
ST_ADRENERGIC	-0.0973092	0.043596	0.196182	0.00151806	-0.0882156	0.0673439	0.265206	-0.108591	0.0243285	0.12367
KEGG_P53_SIGNALING_PATHWAY	-0.0713113	0.0440512	0.19634	0.000845386	-0.068595	0.052758	0.228558	-0.0973207	0.00599579	0.0513063
BIOCARTA_STEM_PATHWAY	-0.150229	0.0440561	0.19634	0.00229556	-0.15641	0.0360467	0.176505	-0.0960106	0.198144	0.449527
BIOCARTA_KERATINOCYTE_PATHWAY	-0.0866896	0.044557	0.197722	0.00140942	-0.0818383	0.0579083	0.244247	-0.0846455	0.0498279	0.199564
REACTOME_SIGNAL_AMPLIFICATION	-0.113432	0.0454688	0.201069	0.0023289	-0.0972209	0.0864507	0.307755	-0.108239	0.0562977	0.21363
PID_IL12_STAT4_PATHWAY	-0.101932	0.0462164	0.201875	0.00187003	-0.106269	0.0376878	0.180506	-0.0502619	0.325638	0.572675
REACTOME_GASTRIN_CREB_SIGNALLING_PATHWAY_VIA_PKC_AND_MAPK	-0.0418484	0.0460486	0.201875	0.000550481	-0.0340246	0.104811	0.343455	-0.0235733	0.261122	0.517498
PID_ATM_PATHWAY	-0.101567	0.0470016	0.204313	0.00171197	-0.10939	0.0324136	0.163734	-0.148048	0.00378836	0.0371551
REACTOME_NEP_NS2_INTERACTS_WITH_THE_CELLULAR_EXPORT_MACHINERY	-0.112295	0.0476762	0.206543	0.00355694	-0.109686	0.0530844	0.228709	-0.176397	0.00186683	0.0229555
REACTOME_METABOLISM_OF_NON_CODING_RNA	-0.0890433	0.0488386	0.210259	0.00242	-0.0937649	0.038037	0.180506	-0.156196	0.000548896	0.00972003
SIG_PIP3_SIGNALING_IN_B_LYMPHOCYTES	-0.0946382	0.0496968	0.212416	0.00189632	-0.0560745	0.244892	0.532538	-0.0706124	0.143105	0.362742
KEGG_PROGESTERONE_MEDIATED_OOCYTE_MATURATION	-0.0620699	0.0513181	0.217168	0.000892284	-0.049114	0.123067	0.37537	-0.0807134	0.0112723	0.0775774
REACTOME_TAK1_ACTIVATES_NFKB_BY_PHOSPHORYLATION_AND_ACTIVATION_OF_IKKS_COMPLEX	-0.117508	0.0512578	0.217168	0.00170492	-0.136808	0.0232389	0.128014	-0.0879091	0.144755	0.365779
BIOCARTA_P38MAPK_PATHWAY	-0.0913085	0.0517556	0.217586	0.00101122	-0.0946708	0.0437178	0.200976	-0.0784781	0.0945578	0.286712
PID_ECADHERIN_NASCENT_AJ_PATHWAY	-0.097951	0.0517574	0.217586	0.00275481	-0.0816179	0.105062	0.343455	-0.117516	0.0215518	0.114973
PID_FAS_PATHWAY	-0.0921183	0.0528017	0.220525	0.00154528	-0.0844416	0.0758725	0.281058	-0.0912515	0.0550714	0.211494
REACTOME_RECRUITMENT_OF_NUMA_TO_MITOTIC_CENTROSOMES	-0.176949	0.0527355	0.220525	0.00315792	-0.134256	0.141639	0.406001	-0.218995	0.0165139	0.099208
REACTOME_PHOSPHORYLATION_OF_THE_APC_C	-0.13967	0.053198	0.221015	0.00427607	-0.132203	0.0672565	0.265206	-0.141411	0.0503	0.200414
REACTOME_REMOVAL_OF_THE_FLAP_INTERMEDIATE_FROM_THE_C_STRAND	-0.17526	0.0550366	0.227627	0.00464374	-0.189402	0.0381351	0.180506	-0.109645	0.230028	0.491951
PID_MET_PATHWAY	-0.0634982	0.0563191	0.231652	0.00108909	-0.0496704	0.135455	0.398093	-0.0725976	0.0291061	0.139513
KEGG_NOD_LIKE_RECEPTOR_SIGNALING_PATHWAY	-0.0698474	0.0577181	0.234815	0.000577057	-0.0802971	0.0291276	0.151939	-0.0416992	0.257211	0.515635
KEGG_NEUROTROPHIN_SIGNALING_PATHWAY	-0.0506256	0.0575646	0.234815	0.000639698	-0.0384694	0.149019	0.414014	-0.0599033	0.0246403	0.124176
REACTOME_CHONDROITIN_SULFATE_BIOSYNTHESIS	-0.125568	0.0582635	0.234892	0.0026351	-0.115292	0.0820812	0.298766	-0.148264	0.025352	0.12676
REACTOME_IL_3_5_AND_GM_CSF_SIGNALING	-0.0846135	0.0581495	0.234892	0.000650828	-0.0719967	0.106948	0.345315	-0.0795018	0.0750583	0.254519
REACTOME_ACTIVATED_TLR4_SIGNALLING	-0.058993	0.0594257	0.238824	0.000337559	-0.0644151	0.0395636	0.18521	-0.0460139	0.141482	0.361978
BIOCARTA_CERAMIDE_PATHWAY	-0.115718	0.0604435	0.241396	0.00153403	-0.114618	0.0629281	0.258304	-0.114122	0.0640766	0.232602
BIOCARTA_ASBCELL_PATHWAY	-0.156422	0.0607138	0.24172	0.00398556	-0.150674	0.0708169	0.272602	-0.14638	0.0792319	0.262117
BIOCARTA_CTLA4_PATHWAY	-0.121014	0.0611614	0.242746	0.00362852	-0.114861	0.0755456	0.280916	-0.0479202	0.458437	0.697195
KEGG_RNA_POLYMERASE	-0.110091	0.0621186	0.245158	0.00211205	-0.095954	0.103971	0.343455	-0.159874	0.00674869	0.0556848
BIOCARTA_BCR_PATHWAY	-0.0966594	0.0627938	0.246167	0.00234307	-0.0637415	0.219826	0.508944	-0.0672647	0.195385	0.446444
PID_TNF_PATHWAY	-0.0797175	0.0647107	0.252135	0.000788612	-0.0782918	0.0696453	0.269717	-0.0419022	0.331561	0.577514
REACTOME_S_PHASE	-0.0536601	0.0646994	0.252135	0.000670915	-0.0574023	0.0492562	0.218575	-0.0469343	0.106143	0.309686
PID_GMCSF_PATHWAY	-0.0886003	0.0661578	0.255375	0.00140455	-0.0628073	0.192757	0.473532	-0.0890774	0.064712	0.233661
PID_HIF2PATHWAY	-0.0924603	0.0663415	0.255375	0.0014593	-0.0947458	0.0599049	0.251837	-0.0942664	0.0612107	0.226238
REACTOME_G0_AND_EARLY_G1	-0.113193	0.0662709	0.255375	0.00414725	-0.118193	0.0551485	0.236509	-0.175977	0.00430007	0.0409148
REACTOME_ACTIVATION_OF_IRF3_IRF7_MEDIATED_BY_TBK1_IKK_EPSILON	-0.166948	0.0676102	0.259477	0.00339069	-0.196153	0.0317693	0.162405	-0.0599755	0.511466	0.741045
KEGG_HEMATOPOIETIC_CELL_LINEAGE	-0.0572668	0.0688633	0.263495	0.00160205	-0.0741793	0.0184431	0.10734	0.0171872	0.585052	0.790072
REACTOME_MICRORNA_MIRNA_BIOGENESIS	-0.15129	0.0696725	0.264218	0.00254195	-0.134559	0.106653	0.345315	-0.197199	0.0180542	0.103224
BIOCARTA_MCM_PATHWAY	-0.123399	0.0700676	0.26493	0.00158913	-0.124479	0.0676503	0.265206	-0.115561	0.0898061	0.282542
REACTOME_AKT_PHOSPHORYLATES_TARGETS_IN_THE_CYTOSOL	-0.150933	0.0703343	0.265154	0.00517734	-0.17259	0.0385057	0.181588	-0.127789	0.125462	0.338908
BIOCARTA_P53HYPOXIA_PATHWAY	-0.110931	0.0718798	0.270184	0.00176356	-0.117401	0.056799	0.240361	-0.104365	0.0903912	0.283167
NABA_PROTEOGLYCANS	-0.0891886	0.0722304	0.270705	0.00113593	-0.0885895	0.0741666	0.278779	-0.0530648	0.284818	0.531688
KEGG_O_GLYCAN_BIOSYNTHESIS	-0.0996529	0.0733448	0.271852	0.00345297	-0.092588	0.0961669	0.327598	-0.110772	0.0465379	0.19138
KEGG_GRAFT_VERSUS_HOST_DISEASE	-0.0875561	0.0733874	0.271852	0.00171491	-0.102728	0.0356707	0.175335	-0.0460427	0.346442	0.592493
REACTOME_DEPOSITION_OF_NEW_CENPA_CONTAINING_NUCLEOSOMES_AT_THE_CENTROMERE	-0.0773489	0.0730747	0.271852	0.00320457	-0.0650903	0.131478	0.39351	-0.112702	0.00980707	0.0718621
REACTOME_HOMOLOGOUS_RECOMBINATION_REPAIR_OF_REPLICATION_INDEPENDENT_DOUBLE_STRAND_BREAKS	-0.128836	0.0745299	0.274595	0.00378581	-0.1411	0.050807	0.222832	-0.102089	0.15762	0.385731
PID_DELTA_NP63_PATHWAY	-0.0760562	0.0747858	0.274645	0.00144319	-0.0629702	0.140158	0.405211	-0.0745269	0.0808209	0.264902
SA_MMP_CYTOKINE_CONNECTION	-0.132672	0.0753647	0.2752	0.00381392	-0.142344	0.0564074	0.240295	-0.0489965	0.511365	0.741045
PID_FGF_PATHWAY	-0.0694553	0.0753678	0.2752	0.00125212	-0.0520781	0.182427	0.45894	-0.0672548	0.0850919	0.27397
REACTOME_INFLUENZA_VIRAL_RNA_TRANSCRIPTION_AND_REPLICATION	-0.0653865	0.0756302	0.275371	0.00285563	-0.0549274	0.138755	0.403021	-0.0740151	0.0460534	0.190093
BIOCARTA_TCAPOPTOSIS_PATHWAY	-0.161562	0.0769552	0.278608	0.0118313	-0.161431	0.0771951	0.283492	-0.0485049	0.595428	0.791889
KEGG_B_CELL_RECEPTOR_SIGNALING_PATHWAY	-0.0599269	0.0774576	0.278784	0.00119758	-0.0461743	0.173693	0.449351	-0.0266216	0.432835	0.672522
BIOCARTA_FCER1_PATHWAY	-0.0863142	0.0775607	0.278784	0.00211906	-0.0551467	0.259456	0.547169	-0.0727843	0.13666	0.357053
BIOCARTA_HDAC_PATHWAY	-0.103515	0.0794262	0.281963	0.00222534	-0.0840032	0.15462	0.423814	-0.107128	0.0694865	0.242204
REACTOME_SIGNALLING_BY_NGF	-0.0362884	0.0791255	0.281963	0.000798192	-0.0215968	0.296054	0.582984	-0.0452967	0.0284074	0.136677
REACTOME_LAGGING_STRAND_SYNTHESIS	-0.116357	0.0792928	0.281963	0.00332371	-0.113161	0.0878949	0.311162	-0.065536	0.322976	0.570025
REACTOME_HIV_LIFE_CYCLE	-0.0512776	0.0789913	0.281963	0.000955335	-0.0368212	0.207186	0.492315	-0.0882504	0.00263001	0.0281786
REACTOME_INTERACTIONS_OF_VPR_WITH_HOST_CELLULAR_PROTEINS	-0.0893849	0.0804567	0.283092	0.00252337	-0.0876766	0.0864128	0.307755	-0.15006	0.00386985	0.0373852
REACTOME_APC_C_CDC20_MEDIATED_DEGRADATION_OF_CYCLIN_B	-0.126148	0.0807854	0.283092	0.00365349	-0.11782	0.10292	0.343425	-0.150785	0.0368735	0.163739
PID_PDGFRA_PATHWAY	-0.107331	0.0816011	0.284935	0.00267545	-0.0617289	0.316554	0.598456	-0.157306	0.0107009	0.0749653
REACTOME_THE_ACTIVATION_OF_ARYLSULFATASES	-0.145045	0.082007	0.285572	0.00367437	-0.158967	0.0566398	0.240361	-0.157249	0.059365	0.221966
PID_IL5_PATHWAY	-0.134065	0.0825478	0.286299	0.00303854	-0.102143	0.18593	0.462959	-0.0897937	0.244915	0.504469
BIOCARTA_IL17_PATHWAY	-0.125145	0.0832266	0.286694	0.00589274	-0.142955	0.0478413	0.213525	0.0151	0.834438	0.924334
PID_TCPTP_PATHWAY	-0.0772222	0.0837963	0.287881	0.000898769	-0.0655802	0.141998	0.406001	-0.103789	0.0201301	0.110979
BIOCARTA_MTA3_PATHWAY	-0.114429	0.0843979	0.288397	0.00276962	-0.100296	0.130387	0.392082	-0.155664	0.0188951	0.106599
SIG_CD40PATHWAYMAP	-0.0856281	0.0843655	0.288397	0.00171575	-0.0784952	0.113621	0.357653	-0.0982489	0.0476726	0.193575
PID_RET_PATHWAY	-0.0820072	0.0847113	0.288528	0.00221399	-0.0528165	0.26686	0.557267	-0.114503	0.0160788	0.0980886
BIOCARTA_RANKL_PATHWAY	-0.132403	0.0864248	0.291427	0.00314911	-0.137481	0.075023	0.280916	-0.107055	0.165649	0.399248
REACTOME_PROSTACYCLIN_SIGNALLING_THROUGH_PROSTACYCLIN_RECEPTOR	-0.132491	0.0862171	0.291427	0.00227972	-0.127535	0.0986321	0.330845	-0.102475	0.184506	0.428498
BIOCARTA_CARDIACEGF_PATHWAY	-0.120025	0.0868197	0.291988	0.0022416	-0.113986	0.103895	0.343455	-0.0786538	0.261793	0.517498
REACTOME_PROCESSING_OF_CAPPED_INTRONLESS_PRE_MRNA	-0.119788	0.0874464	0.293324	0.0048287	-0.11716	0.0946154	0.32505	-0.144115	0.0397722	0.170739
KEGG_CHRONIC_MYELOID_LEUKEMIA	-0.0574967	0.090259	0.298837	0.00118711	-0.044422	0.1906	0.471154	-0.0654606	0.0537727	0.207758
PID_TCR_PATHWAY	-0.0613967	0.0901319	0.298837	0.00193513	-0.0466303	0.198057	0.481684	-0.0174138	0.630757	0.815634
PID_NECTIN_PATHWAY	-0.092653	0.0900103	0.298837	0.00151806	-0.0776163	0.155548	0.423861	-0.0853511	0.118351	0.327327
ST_B_CELL_ANTIGEN_RECEPTOR	-0.0771532	0.0917764	0.301517	0.00125618	-0.047559	0.298642	0.586275	-0.0499569	0.274942	0.527144
REACTOME_RNA_POL_III_TRANSCRIPTION_INITIATION_FROM_TYPE_2_PROMOTER	-0.106369	0.0917399	0.301517	0.00389079	-0.0903336	0.152124	0.420575	-0.130507	0.0385517	0.168912
KEGG_RIBOSOME	-0.0659305	0.0943934	0.304475	0.00302291	-0.0641461	0.106886	0.345315	-0.076921	0.0531803	0.207396
BIOCARTA_PTDINS_PATHWAY	-0.105389	0.0947722	0.304475	0.00472623	-0.0943413	0.134757	0.398093	-0.0713117	0.25826	0.516115
BIOCARTA_ARF_PATHWAY	-0.117337	0.0941178	0.304475	0.00341677	-0.0959534	0.171006	0.444198	-0.186344	0.00784672	0.0606337
ST_GA13_PATHWAY	-0.0808056	0.093795	0.304475	0.000741449	-0.0685977	0.154868	0.423814	-0.0775005	0.108018	0.310937
PID_INSULIN_PATHWAY	-0.073138	0.0937473	0.304475	0.00131548	-0.0474566	0.276832	0.567569	-0.0679189	0.119624	0.328001
REACTOME_CS_DS_DEGRADATION	-0.139943	0.0933502	0.304475	0.00204834	-0.130453	0.117772	0.364436	-0.114346	0.170357	0.406751
REACTOME_P75NTR_SIGNALS_VIA_NFKB	-0.146147	0.093373	0.304475	0.0039292	-0.146434	0.0927319	0.320301	-0.0954161	0.273323	0.524829
REACTOME_REPAIR_SYNTHESIS_FOR_GAP_FILLING_BY_DNA_POL_IN_TC_NER	-0.129	0.0948208	0.304475	0.00525366	-0.142524	0.0649457	0.262065	-0.0622854	0.419914	0.659374
REACTOME_O_LINKED_GLYCOSYLATION_OF_MUCINS	-0.0696306	0.095689	0.30577	0.00143062	-0.0721166	0.0844191	0.304767	-0.0796294	0.0567324	0.21464
PID_NOTCH_PATHWAY	-0.0637796	0.0964872	0.307508	0.00137186	-0.0540271	0.15914	0.43005	-0.0954792	0.0128382	0.0830897
BIOCARTA_LAIR_PATHWAY	-0.116141	0.0975202	0.309258	0.00422119	-0.155614	0.026408	0.140187	-0.000220056	0.997495	0.997495
REACTOME_LATE_PHASE_OF_HIV_LIFE_CYCLE	-0.051868	0.0974465	0.309258	0.00115838	-0.0382228	0.221955	0.509849	-0.0971212	0.00191349	0.023016
BIOCARTA_NFAT_PATHWAY	-0.0677912	0.101251	0.317154	0.00104937	-0.0549875	0.183752	0.460116	-0.083713	0.0451689	0.188204
PID_S1P_S1P2_PATHWAY	-0.0988389	0.101083	0.317154	0.00236076	-0.0760536	0.207078	0.492315	-0.128217	0.033422	0.152735
REACTOME_M_G1_TRANSITION	-0.0556581	0.101034	0.317154	0.000604105	-0.0554321	0.104788	0.343455	-0.0639244	0.0596458	0.222364
REACTOME_THROMBIN_SIGNALLING_THROUGH_PROTEINASE_ACTIVATED_RECEPTORS_PARS	-0.0908252	0.102668	0.320024	0.00223925	-0.0785735	0.15798	0.42957	-0.0979824	0.0782963	0.260647
REACTOME_GENERIC_TRANSCRIPTION_PATHWAY	-0.0273117	0.103366	0.320637	0.000965324	-0.0203682	0.224502	0.510522	-0.0379022	0.0238049	0.122384
BIOCARTA_MITOCHONDRIA_PATHWAY	-0.102453	0.104333	0.322853	0.00200903	-0.106563	0.091151	0.317513	-0.049264	0.434809	0.672794
BIOCARTA_IL5_PATHWAY	-0.147974	0.105257	0.324924	0.00317005	-0.162301	0.0756142	0.280916	-0.116287	0.203018	0.455191
ST_INTERLEUKIN_4_PATHWAY	-0.0914576	0.106789	0.328859	0.00163158	-0.0547461	0.33434	0.613036	-0.111725	0.0488171	0.196346
BIOCARTA_IL2RB_PATHWAY	-0.0755694	0.107426	0.329235	0.000808821	-0.050781	0.279344	0.567569	-0.0731127	0.119345	0.328001
REACTOME_DOUBLE_STRAND_BREAK_REPAIR	-0.0991118	0.107811	0.329624	0.0031807	-0.104055	0.0913522	0.317513	-0.0664692	0.280822	0.529085
BIOCARTA_SET_PATHWAY	-0.146321	0.109201	0.331486	0.00381265	-0.167287	0.0670545	0.265206	-0.0688603	0.450958	0.691903
KEGG_NATURAL_KILLER_CELL_MEDIATED_CYTOTOXICITY	-0.0419331	0.109874	0.33196	0.00138189	-0.0351521	0.180176	0.456874	-0.000214694	0.993469	0.99503
REACTOME_GLYCOSAMINOGLYCAN_METABOLISM	-0.0445755	0.110938	0.333599	0.000447666	-0.0408044	0.14453	0.408511	-0.0583326	0.0369857	0.163739
REACTOME_HORMONE_LIGAND_BINDING_RECEPTORS	-0.144963	0.112531	0.337593	0.00395286	-0.146888	0.107836	0.346672	-0.18788	0.0397117	0.170739
REACTOME_SIGNALING_BY_SCF_KIT	-0.0527131	0.115481	0.344824	0.0011592	-0.0328245	0.327014	0.608638	-0.0721211	0.0312758	0.146264
REACTOME_INITIAL_TRIGGERING_OF_COMPLEMENT	-0.129974	0.119126	0.35488	0.00790391	-0.136622	0.101389	0.339202	-0.0115122	0.890211	0.954919
BIOCARTA_PS1_PATHWAY	-0.120016	0.120147	0.355482	0.00300495	-0.122027	0.11406	0.358154	-0.10484	0.174582	0.413681
REACTOME_G_BETA_GAMMA_SIGNALLING_THROUGH_PLC_BETA	-0.115915	0.120269	0.355482	0.0030116	-0.103326	0.16608	0.43653	-0.0750746	0.314298	0.560461
REACTOME_PEPTIDE_CHAIN_ELONGATION	-0.0625868	0.122738	0.359768	0.00324512	-0.0593795	0.147073	0.410526	-0.0698448	0.0881023	0.280126
NABA_ECM_GLYCOPROTEINS	-0.0323196	0.123389	0.360851	0.000630516	-0.0348781	0.0963824	0.327598	-0.0307844	0.142241	0.361978
BIOCARTA_PTEN_PATHWAY	-0.104596	0.124671	0.363765	0.00485837	-0.0342913	0.61469	0.833122	-0.0961182	0.158245	0.385882
BIOCARTA_IL4_PATHWAY	-0.133247	0.126073	0.365356	0.00207908	-0.120334	0.16712	0.437663	-0.153367	0.0782801	0.260647
REACTOME_SHC_MEDIATED_CASCADE	-0.0834823	0.126627	0.366128	0.00219338	-0.0860888	0.115203	0.359487	-0.099199	0.0695057	0.242204
KEGG_GLYCOSPHINGOLIPID_BIOSYNTHESIS_LACTO_AND_NEOLACTO_SERIES	-0.0864807	0.127252	0.367105	0.00204513	-0.0938356	0.0979799	0.330391	-0.115446	0.0417693	0.17752
REACTOME_TIE2_SIGNALING	-0.106296	0.129383	0.372413	0.00481016	-0.0842464	0.229382	0.517019	-0.118971	0.0896261	0.282542
REACTOME_ACTIVATED_TAK1_MEDIATES_P38_MAPK_ACTIVATION	-0.106087	0.130138	0.373745	0.00304712	-0.125895	0.0724685	0.277274	-0.0686106	0.327641	0.573799
BIOCARTA_EPONFKB_PATHWAY	-0.130042	0.135445	0.377944	0.00277209	-0.140608	0.106468	0.345315	-0.0767195	0.37843	0.623479
BIOCARTA_P53_PATHWAY	-0.108079	0.134645	0.377944	0.00545513	-0.120517	0.0952768	0.326444	-0.130128	0.071667	0.246295
BIOCARTA_MET_PATHWAY	-0.0720387	0.1352	0.377944	0.00147019	-0.0357738	0.458173	0.720768	-0.0816735	0.094896	0.286712
BIOCARTA_41BB_PATHWAY	-0.104992	0.134152	0.377944	0.00193985	-0.098442	0.160175	0.43005	-0.0998081	0.154454	0.381645
SIG_IL4RECEPTOR_IN_B_LYPHOCYTES	-0.0838195	0.132025	0.377944	0.00154293	-0.0613805	0.270047	0.56117	-0.0871391	0.117392	0.326089
PID_CDC42_REG_PATHWAY	-0.0816552	0.135147	0.377944	0.00280828	-0.0714637	0.191001	0.471234	-0.0435177	0.425871	0.664609
PID_CONE_PATHWAY	-0.0900111	0.13539	0.377944	0.00424212	-0.0961041	0.110879	0.353256	0.00151296	0.979977	0.989602
REACTOME_PRESYNAPTIC_NICOTINIC_ACETYLCHOLINE_RECEPTORS	-0.12475	0.134703	0.377944	0.00726185	-0.111642	0.180688	0.457266	-0.0219417	0.792481	0.902472
REACTOME_IL_RECEPTOR_SHC_SIGNALING	-0.085056	0.133639	0.377944	0.00137921	-0.077924	0.169399	0.442207	-0.0874027	0.123247	0.335053
REACTOME_NOD1_2_SIGNALING_PATHWAY	-0.0797715	0.137441	0.380195	0.00162077	-0.0962811	0.0730046	0.277678	-0.0335657	0.531964	0.753616
BIOCARTA_TEL_PATHWAY	-0.103817	0.138562	0.381045	0.00217574	-0.0902117	0.198073	0.481684	-0.0847	0.226884	0.491133
REACTOME_INTERFERON_GAMMA_SIGNALING	-0.0549472	0.141865	0.38823	0.000567198	-0.0558905	0.135152	0.398093	-0.0369523	0.323237	0.570025
REACTOME_PI3K_EVENTS_IN_ERBB2_SIGNALING	-0.0653745	0.143251	0.388694	0.0011944	-0.0509049	0.254368	0.541801	-0.0518666	0.245506	0.504872
REACTOME_CELL_SURFACE_INTERACTIONS_AT_THE_VASCULAR_WALL	-0.0466332	0.143155	0.388694	0.00103972	-0.0538803	0.0907087	0.317513	-0.00304147	0.923924	0.968511
REACTOME_N_GLYCAN_TRIMMING_IN_THE_ER_AND_CALNEXIN_CALRETICULIN_CYCLE	-0.117429	0.142804	0.388694	0.00391056	-0.11777	0.141647	0.406001	-0.202266	0.0115983	0.0782422
KEGG_PANCREATIC_CANCER	-0.0504941	0.147971	0.39562	0.000945495	-0.045688	0.190524	0.471154	-0.0634499	0.0690746	0.242204
KEGG_GLIOMA	-0.0532614	0.147849	0.39562	0.00105451	-0.028016	0.446524	0.720519	-0.0615382	0.0945136	0.286712
PID_ER_NONGENOMIC_PATHWAY	-0.0671833	0.147104	0.39562	0.00135325	-0.04326	0.350529	0.638143	-0.0616555	0.18334	0.427345
REACTOME_POST_CHAPERONIN_TUBULIN_FOLDING_PATHWAY	-0.0989462	0.146358	0.39562	0.00251562	-0.0934988	0.169893	0.442207	-0.121395	0.0747398	0.254115
REACTOME_CALNEXIN_CALRETICULIN_CYCLE	-0.126235	0.147262	0.39562	0.00461612	-0.129825	0.136099	0.398093	-0.207016	0.0174688	0.102169
BIOCARTA_TID_PATHWAY	-0.0948207	0.152714	0.405756	0.00244641	-0.103904	0.117115	0.363283	-0.0642378	0.34568	0.592396
PID_ILK_PATHWAY	-0.0624267	0.152572	0.405756	0.00158521	-0.050208	0.249933	0.538641	-0.0409516	0.348038	0.593247
PID_ENDOTHELIN_PATHWAY	-0.0529344	0.153658	0.405926	0.00129086	-0.031264	0.399426	0.683282	-0.0306126	0.40932	0.653045
REACTOME_SIGNALING_BY_RHO_GTPASES	-0.0396928	0.15391	0.405926	0.000757707	-0.0340717	0.22098	0.509849	-0.0310881	0.264103	0.517498
REACTOME_HYALURONAN_METABOLISM	-0.110218	0.1535	0.405926	0.00298572	-0.113832	0.14046	0.405211	-0.0954775	0.216312	0.475515
ST_PHOSPHOINOSITIDE_3_KINASE_PATHWAY	-0.0685456	0.155181	0.406416	0.00175522	-0.0442444	0.358871	0.644497	-0.0834255	0.0836237	0.270904
PID_ATF2_PATHWAY	-0.0545303	0.155292	0.406416	0.00101977	-0.0262963	0.493159	0.745866	-0.0776391	0.0430416	0.181715
REACTOME_REGULATION_OF_INSULIN_SECRETION_BY_ACETYLCHOLINE	-0.129747	0.155507	0.406416	0.00281557	-0.0776893	0.395063	0.682285	-0.151324	0.0976105	0.292795
REACTOME_G_PROTEIN_BETA_GAMMA_SIGNALLING	-0.0874263	0.156042	0.406982	0.0031155	-0.074473	0.226917	0.512951	-0.0493707	0.423103	0.661098
REACTOME_RNA_POL_I_RNA_POL_III_AND_MITOCHONDRIAL_TRANSCRIPTION	-0.04327	0.157343	0.409294	0.00129877	-0.0317833	0.301626	0.587619	-0.0602025	0.0516948	0.204058
REACTOME_GROWTH_HORMONE_RECEPTOR_SIGNALING	-0.0830472	0.159367	0.41229	0.00234372	-0.0720627	0.222059	0.509849	-0.0821518	0.163914	0.395815
REACTOME_MITOCHONDRIAL_TRNA_AMINOACYLATION	-0.0884904	0.160661	0.413962	0.00291303	-0.0688522	0.275043	0.567569	-0.0467396	0.458713	0.697195
BIOCARTA_IGF1_PATHWAY	-0.0884029	0.161076	0.414151	0.00327104	-0.0474934	0.451498	0.720768	-0.14203	0.0243461	0.12367
REACTOME_REGULATION_OF_KIT_SIGNALING	-0.101173	0.161383	0.414151	0.00363507	-0.0582317	0.420219	0.702012	-0.172975	0.0166514	0.099208
PID_RAC1_REG_PATHWAY	-0.0655842	0.162368	0.415843	0.00257888	-0.0457663	0.329577	0.608973	-0.0541364	0.248798	0.509177
PID_AURORA_B_PATHWAY	-0.0653094	0.164135	0.41776	0.00161573	-0.0661356	0.158866	0.43005	-0.0942993	0.0445508	0.186237
PID_AURORA_A_PATHWAY	-0.0748297	0.163509	0.41776	0.00163895	-0.0845935	0.115217	0.359487	-0.0962116	0.0732121	0.250256
REACTOME_NOTCH_HLH_TRANSCRIPTION_PATHWAY	-0.115954	0.164423	0.41776	0.00667129	-0.0950368	0.254481	0.541801	-0.16351	0.0499302	0.199564
REACTOME_TRANSPORT_OF_MATURE_TRANSCRIPT_TO_CYTOPLASM	-0.0575344	0.16861	0.425016	0.0018311	-0.046726	0.268546	0.559871	-0.119111	0.00437094	0.0410955
KEGG_GLYCOSPHINGOLIPID_BIOSYNTHESIS_GLOBO_SERIES	-0.109912	0.170182	0.427293	0.00488962	-0.108295	0.176554	0.45205	-0.166148	0.0381342	0.167659
REACTOME_CHONDROITIN_SULFATE_DERMATAN_SULFATE_METABOLISM	-0.0579376	0.170095	0.427293	0.000864475	-0.0543332	0.198252	0.481684	-0.0537153	0.203403	0.455191
ST_STAT3_PATHWAY	-0.118745	0.172796	0.430474	0.00298572	-0.108515	0.212828	0.499525	-0.137623	0.114106	0.320452
REACTOME_G_BETA_GAMMA_SIGNALLING_THROUGH_PI3KGAMMA	-0.0898607	0.175352	0.435991	0.00316501	-0.0805806	0.22427	0.510522	-0.0583364	0.378978	0.623479
REACTOME_RNA_POL_II_TRANSCRIPTION	-0.0440069	0.177558	0.440619	0.00209698	-0.0295471	0.36834	0.655625	-0.0879795	0.00702705	0.0567056
REACTOME_SIGNALING_BY_TGF_BETA_RECEPTOR_COMPLEX	-0.0529823	0.178894	0.443075	0.00138521	-0.044063	0.263618	0.551397	-0.0885927	0.0246017	0.124176
REACTOME_REGULATED_PROTEOLYSIS_OF_P75NTR	-0.121753	0.182584	0.449601	0.00371762	-0.12704	0.164312	0.434762	-0.135539	0.137873	0.358586
KEGG_ANTIGEN_PROCESSING_AND_PRESENTATION	-0.0442494	0.183519	0.450168	0.00134836	-0.0482158	0.147279	0.410526	-0.0372807	0.262486	0.517498
BIOCARTA_ERK_PATHWAY	-0.0740559	0.18328	0.450168	0.00128295	-0.0542732	0.329439	0.608973	-0.06981	0.209687	0.466582
PID_AVB3_OPN_PATHWAY	-0.0710979	0.185543	0.452562	0.00197328	-0.057208	0.286767	0.575334	-0.0209476	0.696496	0.849792
NABA_ECM_REGULATORS	-0.0256709	0.185558	0.452562	0.000620057	-0.0326502	0.0922341	0.319445	0.00538885	0.781093	0.899839
PID_SYNDECAN_3_PATHWAY	-0.0923361	0.187714	0.45695	0.00311373	-0.101738	0.146637	0.410526	-0.113466	0.105483	0.308466
BIOCARTA_IL10_PATHWAY	-0.0948028	0.189432	0.458097	0.00197143	-0.08811	0.22261	0.509849	-0.0853416	0.237485	0.500485
REACTOME_HYALURONAN_UPTAKE_AND_DEGRADATION	-0.119868	0.189452	0.458097	0.00319319	-0.122102	0.181332	0.457989	-0.0975	0.285818	0.532776
REACTOME_KINESINS	-0.078907	0.190542	0.459459	0.0015983	-0.0897016	0.136739	0.398978	-0.09038	0.133796	0.355396
REACTOME_PD1_SIGNALING	-0.0889393	0.191683	0.461339	0.00437734	-0.0957948	0.159649	0.43005	-0.010863	0.8733	0.944358
KEGG_TYPE_I_DIABETES_MELLITUS	-0.0587068	0.194001	0.462563	0.00106253	-0.0696266	0.123458	0.375665	-0.0346351	0.443518	0.682129
REACTOME_ADP_SIGNALLING_THROUGH_P2RY12	-0.0935012	0.195581	0.464597	0.00262309	-0.0861789	0.232914	0.521302	-0.0842148	0.243736	0.503304
REACTOME_CONVERSION_FROM_APC_C_CDC20_TO_APC_C_CDH1_IN_LATE_ANAPHASE	-0.0966193	0.195315	0.464597	0.00312239	-0.0878877	0.238804	0.525286	-0.119955	0.107881	0.310937
BIOCARTA_FMLP_PATHWAY	-0.0649659	0.197011	0.464917	0.000954041	-0.0436004	0.386583	0.674015	-0.035783	0.477338	0.715166
PID_ERBB_NETWORK_PATHWAY	-0.0962192	0.197171	0.464917	0.00272985	-0.0967553	0.194687	0.476647	-0.0414592	0.578423	0.786739
REACTOME_METABOLISM_OF_RNA	-0.0265182	0.198379	0.466903	0.000682037	-0.0209239	0.31254	0.59623	-0.0724103	0.000459252	0.00861097
KEGG_DNA_REPLICATION	-0.0617674	0.200227	0.468808	0.00185822	-0.0673891	0.162269	0.431142	-0.0253907	0.598514	0.792419
REACTOME_POST_TRANSLATIONAL_PROTEIN_MODIFICATION	-0.0283243	0.200423	0.468808	0.000536189	-0.0309172	0.16225	0.431142	-0.055241	0.0125235	0.0828277
REACTOME_RNA_POL_I_TRANSCRIPTION_INITIATION	-0.0770785	0.201022	0.468808	0.00236013	-0.0557684	0.354897	0.641881	-0.12152	0.0438134	0.183757
REACTOME_REGULATION_OF_GLUCOKINASE_BY_GLUCOKINASE_REGULATORY_PROTEIN	-0.0709619	0.202265	0.470845	0.00299992	-0.0686879	0.217105	0.504473	-0.134069	0.0159919	0.0980274
BIOCARTA_D4GDI_PATHWAY	-0.101811	0.203898	0.472925	0.0043588	-0.125048	0.118638	0.366231	-0.0508624	0.525607	0.750534
REACTOME_G1_S_SPECIFIC_TRANSCRIPTION	-0.0887326	0.205528	0.475841	0.00311203	-0.0998846	0.154138	0.423632	-0.0984445	0.160165	0.389301
PID_NFAT_TFPATHWAY	-0.0533249	0.206706	0.476841	0.00112608	-0.0489466	0.246456	0.534756	-0.0808697	0.0555054	0.212521
REACTOME_GLOBAL_GENOMIC_NER_GG_NER	-0.0646135	0.206372	0.476841	0.0013422	-0.0665579	0.193044	0.473532	-0.042651	0.404227	0.649105
REACTOME_PTM_GAMMA_CARBOXYLATION_HYPUSINE_FORMATION_AND_ARYLSULFATASE_ACTIVATION	-0.0712244	0.209118	0.480347	0.00156937	-0.0945108	0.0955874	0.326633	-0.0723987	0.201707	0.453607
REACTOME_SIGNALING_BY_HIPPO	-0.081119	0.209451	0.480347	0.00312012	-0.105641	0.111118	0.353256	-0.141122	0.0333128	0.152735
REACTOME_BASE_FREE_SUGAR_PHOSPHATE_REMOVAL_VIA_THE_SINGLE_NUCLEOTIDE_REPLACEMENT_PATHWAY	-0.11458	0.209729	0.480347	0.00388249	-0.116295	0.202986	0.491318	-0.0646936	0.478817	0.71654
REACTOME_NUCLEOTIDE_BINDING_DOMAIN_LEUCINE_RICH_REPEAT_CONTAINING_RECEPTOR_NLR_SIGNALING_PATHWAYS	-0.0547941	0.209259	0.480347	0.00181195	-0.0658722	0.131183	0.39351	0.00155226	0.971625	0.988685
KEGG_NUCLEOTIDE_EXCISION_REPAIR	-0.0554551	0.214352	0.483996	0.000892534	-0.0603145	0.176858	0.45205	-0.0523118	0.241477	0.502097
ST_T_CELL_SIGNAL_TRANSDUCTION	-0.0538863	0.211783	0.483996	0.0011648	-0.0343915	0.425489	0.70408	-0.0169368	0.694715	0.849324
PID_CD8_TCR_PATHWAY	-0.0499451	0.213654	0.483996	0.00212124	-0.0389068	0.332678	0.611744	0.0148601	0.711382	0.864332
REACTOME_PROCESSING_OF_INTRONLESS_PRE_MRNAS	-0.10369	0.213762	0.483996	0.00720685	-0.0952512	0.25341	0.541569	-0.114611	0.169366	0.405906
REACTOME_TRIF_MEDIATED_TLR3_SIGNALING	-0.0434157	0.213525	0.483996	0.000392797	-0.0488985	0.161209	0.431016	-0.0521594	0.13506	0.355787
REACTOME_ABORTIVE_ELONGATION_OF_HIV1_TRANSCRIPT_IN_THE_ABSENCE_OF_TAT	-0.0998323	0.212824	0.483996	0.00347366	-0.0828863	0.300967	0.587619	-0.130539	0.103305	0.30419
REACTOME_TELOMERE_MAINTENANCE	-0.046894	0.2138	0.483996	0.00116054	-0.038111	0.312332	0.59623	-0.0390163	0.305082	0.548116
REACTOME_FORMATION_OF_INCISION_COMPLEX_IN_GG_NER	-0.0800588	0.215467	0.485655	0.00229177	-0.070173	0.277604	0.567569	-0.0755153	0.242656	0.503067
KEGG_MISMATCH_REPAIR	-0.0741945	0.218397	0.491282	0.00183119	-0.0883624	0.142695	0.407062	-0.0668504	0.267443	0.519015
REACTOME_FGFR_LIGAND_BINDING_AND_ACTIVATION	-0.0758022	0.218732	0.491282	0.00277482	-0.0925544	0.133171	0.395797	-0.110122	0.0739782	0.252198
REACTOME_RNA_POL_II_PRE_TRANSCRIPTION_EVENTS	-0.0518859	0.219221	0.491517	0.0023778	-0.0407791	0.334244	0.613036	-0.0870774	0.0392181	0.170659
REACTOME_A_TETRASACCHARIDE_LINKER_SEQUENCE_IS_REQUIRED_FOR_GAG_SYNTHESIS	-0.0708315	0.220618	0.493783	0.00152372	-0.0684006	0.236869	0.523736	-0.0668115	0.24794	0.508821
KEGG_REGULATION_OF_ACTIN_CYTOSKELETON	-0.0250926	0.223589	0.494212	0.000513366	-0.0172188	0.403641	0.684155	-0.0155151	0.45285	0.69397
PID_HDAC_CLASSIII_PATHWAY	-0.070444	0.223154	0.494212	0.00417445	-0.0610703	0.290929	0.579139	-0.106286	0.0660628	0.235939
REACTOME_PI3K_EVENTS_IN_ERBB4_SIGNALING	-0.0588986	0.22193	0.494212	0.00185114	-0.0412194	0.392669	0.680101	-0.0531309	0.270548	0.52107
REACTOME_SYNTHESIS_OF_PIPS_AT_THE_GOLGI_MEMBRANE	-0.0908133	0.223529	0.494212	0.0022176	-0.0953496	0.201251	0.488043	-0.0730472	0.327545	0.573799
REACTOME_3_UTR_MEDIATED_TRANSLATIONAL_REGULATION	-0.0425472	0.222827	0.494212	0.00203334	-0.0332407	0.34439	0.628758	-0.0412244	0.240948	0.501974
REACTOME_INHIBITION_OF_REPLICATION_INITIATION_OF_DAMAGED_DNA_BY_RB1_E2F1	-0.106124	0.223082	0.494212	0.00266008	-0.0932094	0.284571	0.57363	-0.114603	0.188268	0.435647
KEGG_BASE_EXCISION_REPAIR	-0.06074	0.227742	0.501818	0.00120629	-0.080419	0.110269	0.352309	-0.0262456	0.602232	0.792419
KEGG_EPITHELIAL_CELL_SIGNALING_IN_HELICOBACTER_PYLORI_INFECTION	-0.0424689	0.230456	0.503033	0.000970156	-0.0423831	0.231401	0.520652	-0.0590448	0.0954689	0.287761
PID_S1P_META_PATHWAY	-0.0756605	0.230351	0.503033	0.00223158	-0.0651717	0.301522	0.587619	-0.0403701	0.522177	0.749748
REACTOME_SIGNALING_BY_CONSTITUTIVELY_ACTIVE_EGFR	-0.0889678	0.233081	0.504969	0.00329825	-0.0543296	0.466495	0.723956	-0.0705539	0.344326	0.591665
REACTOME_RNA_POL_II_TRANSCRIPTION_PRE_INITIATION_AND_PROMOTER_OPENING	-0.0591919	0.232847	0.504969	0.00311834	-0.0358377	0.470089	0.724622	-0.101799	0.0401865	0.171939
REACTOME_INHIBITION_OF_THE_PROTEOLYTIC_ACTIVITY_OF_APC_C_REQUIRED_FOR_THE_ONSET_OF_ANAPHASE_BY_MITOTIC_SPINDLE_CHECKPOINT_COMPONENTS	-0.0834931	0.233572	0.505085	0.0035342	-0.0712843	0.309143	0.595689	-0.112333	0.109007	0.310937
REACTOME_NRIF_SIGNALS_CELL_DEATH_FROM_THE_NUCLEUS	-0.0990674	0.234887	0.507071	0.00429835	-0.102441	0.21933	0.508719	-0.122303	0.14252	0.361978
REACTOME_CD28_DEPENDENT_VAV1_PATHWAY	-0.107577	0.238933	0.513145	0.00106617	-0.0893654	0.327931	0.608638	-0.125576	0.169228	0.405906
PID_AP1_PATHWAY	-0.0406339	0.240973	0.514988	0.000630022	-0.0250026	0.470607	0.724622	-0.0390353	0.263389	0.517498
KEGG_BASAL_CELL_CARCINOMA	-0.0455508	0.24353	0.518719	0.0012859	-0.0341875	0.381422	0.670177	-0.0742945	0.0571569	0.215607
REACTOME_SYNTHESIS_OF_GLYCOSYLPHOSPHATIDYLINOSITOL_GPI	-0.0812877	0.246153	0.522565	0.00183883	-0.0978505	0.162701	0.431394	-0.0744764	0.28798	0.533307
BIOCARTA_IL3_PATHWAY	-0.089301	0.247513	0.524579	0.00350718	-0.059731	0.439231	0.71508	-0.0660425	0.392428	0.636572
BIOCARTA_CXCR4_PATHWAY	-0.0675148	0.252619	0.530998	0.00261267	-0.0287596	0.626032	0.839569	-0.0306592	0.603407	0.792419
PID_ARF6_PATHWAY	-0.0576412	0.25235	0.530998	0.000665367	-0.0612595	0.223791	0.510522	-0.0703762	0.162247	0.392534
REACTOME_APC_CDC20_MEDIATED_DEGRADATION_OF_NEK2A	-0.0777887	0.253484	0.531071	0.00342113	-0.0715327	0.293677	0.58173	-0.110757	0.103973	0.30545
BIOCARTA_ARAP_PATHWAY	-0.0822155	0.255109	0.532034	0.00404792	-0.0822707	0.254791	0.541801	-0.0880933	0.222698	0.484539
BIOCARTA_IL2_PATHWAY	-0.0702241	0.254536	0.532034	0.00154317	-0.0360346	0.558771	0.79717	-0.0494377	0.422474	0.661098
REACTOME_MYD88_MAL_CASCADE_INITIATED_ON_PLASMA_MEMBRANE	-0.0375456	0.256026	0.532034	0.000420295	-0.0402068	0.223857	0.510522	-0.0374662	0.257035	0.515635
REACTOME_RNA_POL_III_TRANSCRIPTION_INITIATION_FROM_TYPE_3_PROMOTER	-0.0666667	0.258628	0.536568	0.00254825	-0.0480128	0.415899	0.700391	-0.100428	0.0888109	0.281676
REACTOME_KERATAN_SULFATE_BIOSYNTHESIS	-0.0637519	0.260918	0.539569	0.00193874	-0.0580795	0.305745	0.592033	-0.0968481	0.0876643	0.279733
REACTOME_INCRETIN_SYNTHESIS_SECRETION_AND_INACTIVATION	-0.0724844	0.262083	0.541102	0.00464733	-0.0399289	0.53672	0.77606	-0.0512331	0.427964	0.66706
BIOCARTA_CHEMICAL_PATHWAY	-0.0690205	0.262768	0.541642	0.00196843	-0.0629727	0.306902	0.593375	-0.0172435	0.779647	0.899823
PID_CDC42_PATHWAY	-0.0395103	0.264575	0.544487	0.000797891	-0.0252277	0.476251	0.72892	-0.0377463	0.286501	0.533268
KEGG_FOCAL_ADHESION	-0.0233473	0.265716	0.545957	0.000418358	-0.0152772	0.466449	0.723956	0.00077423	0.970559	0.988685
KEGG_ADIPOCYTOKINE_SIGNALING_PATHWAY	-0.0393429	0.266604	0.546903	0.00109837	-0.0396927	0.262378	0.551397	-0.0323162	0.361505	0.608982
KEGG_CELL_ADHESION_MOLECULES_CAMS	-0.0281915	0.267561	0.547503	0.000808055	-0.0352055	0.166197	0.43653	0.0142393	0.575489	0.783919
BIOCARTA_ETS_PATHWAY	-0.0754946	0.267754	0.547503	0.0037797	-0.0750075	0.270854	0.561934	-0.124496	0.0676131	0.24013
REACTOME_RESOLUTION_OF_AP_SITES_VIA_THE_MULTIPLE_NUCLEOTIDE_PATCH_REPLACEMENT_PATHWAY	-0.0772374	0.270481	0.551315	0.00244684	-0.0891442	0.203433	0.49147	-0.0352414	0.615109	0.802727
KEGG_HEDGEHOG_SIGNALING_PATHWAY	-0.0433823	0.271064	0.551624	0.00114533	-0.0365443	0.353859	0.641881	-0.0776769	0.0487621	0.196346
KEGG_PRION_DISEASES	-0.0542086	0.274562	0.552956	0.00120255	-0.0617112	0.213561	0.499525	-0.013249	0.789436	0.902081
BIOCARTA_GRANULOCYTES_PATHWAY	-0.0876618	0.273973	0.552956	0.00327301	-0.116082	0.147442	0.410526	0.00291868	0.970945	0.988685
BIOCARTA_GSK3_PATHWAY	-0.0621055	0.273433	0.552956	0.00216969	-0.0593307	0.295443	0.582984	0.00675816	0.905136	0.960541
REACTOME_GRB2_EVENTS_IN_ERBB2_SIGNALING	-0.067254	0.27518	0.552956	0.00177676	-0.0498996	0.418152	0.700391	-0.0572477	0.352964	0.597991
REACTOME_TRAF6_MEDIATED_INDUCTION_OF_NFKB_AND_MAP_KINASES_UPON_TLR7_8_OR_9_ACTIVATION	-0.0376015	0.27452	0.552956	0.000494772	-0.040754	0.236287	0.523736	-0.0472281	0.169922	0.406474
KEGG_ASTHMA	-0.0592565	0.278248	0.558244	0.00156507	-0.0744808	0.172936	0.4483	-0.0245903	0.652749	0.822386
REACTOME_ACETYLCHOLINE_BINDING_AND_DOWNSTREAM_EVENTS	-0.0807039	0.279387	0.558774	0.00532955	-0.0593805	0.426094	0.70408	-0.0217985	0.770156	0.895562
REACTOME_SHC1_EVENTS_IN_ERBB4_SIGNALING	-0.0697818	0.28029	0.559262	0.00236016	-0.0501104	0.438157	0.714241	-0.0630491	0.329314	0.575172
REACTOME_G_ALPHA_Z_SIGNALLING_EVENTS	-0.0499622	0.280944	0.559262	0.00142446	-0.033083	0.475263	0.728281	-0.0168633	0.715922	0.866034
REACTOME_SIGNALING_BY_ERBB2	-0.0326708	0.283032	0.560351	0.000833676	-0.0149469	0.623329	0.83807	-0.0496342	0.102907	0.30419
REACTOME_MRNA_PROCESSING	-0.0275946	0.283306	0.560351	0.00136735	-0.0154294	0.550103	0.789894	-0.0807538	0.00169059	0.0221402
REACTOME_INHIBITION_OF_INSULIN_SECRETION_BY_ADRENALINE_NORADRENALINE	-0.0692916	0.283683	0.560351	0.00370603	-0.0324583	0.61553	0.833313	-0.0408405	0.527462	0.750534
REACTOME_SYNTHESIS_SECRETION_AND_DEACYLATION_OF_GHRELIN	-0.0828012	0.283612	0.560351	0.00500697	-0.092302	0.23198	0.521039	-0.118598	0.124589	0.3373
BIOCARTA_ACE2_PATHWAY	-0.0854481	0.286273	0.563755	0.00322194	-0.108266	0.176667	0.45205	-0.0216661	0.786869	0.9014
PID_P38_MK2_PATHWAY	-0.0689178	0.286289	0.563755	0.00267166	-0.0706146	0.274591	0.567569	-0.117227	0.0697181	0.242209
REACTOME_SRP_DEPENDENT_COTRANSLATIONAL_PROTEIN_TARGETING_TO_MEMBRANE	-0.0360987	0.287518	0.563774	0.00232885	-0.0313117	0.359534	0.644497	-0.0356278	0.297157	0.537411
REACTOME_HIGHLY_CALCIUM_PERMEABLE_POSTSYNAPTIC_NICOTINIC_ACETYLCHOLINE_RECEPTORS	-0.0878842	0.291987	0.570581	0.00642423	-0.0616217	0.459984	0.721265	-0.0258744	0.756374	0.890328
PID_HEDGEHOG_GLI_PATHWAY	-0.0450974	0.296015	0.574174	0.00124773	-0.0211763	0.623634	0.83807	-0.0906735	0.0356302	0.16064
REACTOME_POL_SWITCHING	-0.0839974	0.294533	0.574174	0.00450863	-0.0780686	0.329937	0.608973	-0.0355098	0.657666	0.824916
REACTOME_REGULATION_OF_WATER_BALANCE_BY_RENAL_AQUAPORINS	-0.0510981	0.296073	0.574174	0.000665692	-0.0358135	0.463961	0.723956	-0.0515989	0.291365	0.535624
REACTOME_ADAPTIVE_IMMUNE_SYSTEM	-0.0143156	0.297113	0.574587	0.000185625	-0.0142718	0.300061	0.587619	-0.0192838	0.160606	0.389301
PID_A6B1_A6B4_INTEGRIN_PATHWAY	-0.0447668	0.299569	0.57745	0.00214433	-0.0469396	0.276726	0.567569	-0.0106215	0.805584	0.90664
REACTOME_RESOLUTION_OF_AP_SITES_VIA_THE_SINGLE_NUCLEOTIDE_REPLACEMENT_PATHWAY	-0.086323	0.300644	0.578553	0.00322401	-0.0916054	0.272034	0.563468	-0.0675717	0.417816	0.657674
PID_IFNG_PATHWAY	-0.0478769	0.30151	0.578574	0.000752998	-0.0413116	0.372652	0.66054	-0.0573289	0.216023	0.475515
PID_IL1_PATHWAY	-0.0534348	0.30367	0.580973	0.00115811	-0.0514699	0.321798	0.603367	-0.00933181	0.857441	0.932411
REACTOME_NONSENSE_MEDIATED_DECAY_ENHANCED_BY_THE_EXON_JUNCTION_COMPLEX	-0.0359317	0.303245	0.580973	0.00149687	-0.0290906	0.407966	0.690571	-0.05505	0.117375	0.326089
KEGG_T_CELL_RECEPTOR_SIGNALING_PATHWAY	-0.029226	0.304976	0.5826	0.000741312	-0.0207169	0.467133	0.723956	-0.0152051	0.593557	0.791889
REACTOME_CGMP_EFFECTS	-0.0679438	0.305517	0.582763	0.00214565	-0.0666819	0.314588	0.598093	-0.0893174	0.177976	0.418671
KEGG_NOTCH_SIGNALING_PATHWAY	-0.0427808	0.311059	0.588446	0.00204777	-0.0143332	0.734313	0.897181	-0.0800289	0.0580938	0.218494
REACTOME_COSTIMULATION_BY_THE_CD28_FAMILY	-0.0378782	0.31126	0.588446	0.000922949	-0.0319712	0.392735	0.680101	-0.0553021	0.139311	0.360287
PID_ERBB4_PATHWAY	-0.0473885	0.312723	0.589468	0.00172436	-0.0392537	0.403027	0.684022	-0.0505281	0.281745	0.529085
KEGG_PYRIMIDINE_METABOLISM	-0.0311261	0.314435	0.590953	0.00118942	-0.0258746	0.403023	0.684022	-0.0199489	0.519106	0.748196
BIOCARTA_BIOPEPTIDES_PATHWAY	-0.04662	0.314379	0.590953	0.00128884	-0.0224111	0.628643	0.840383	-0.00586391	0.899301	0.958173
REACTOME_IMMUNOREGULATORY_INTERACTIONS_BETWEEN_A_LYMPHOID_AND_A_NON_LYMPHOID_CELL	-0.0385459	0.315125	0.591379	0.00303623	-0.0563447	0.142005	0.406001	0.04642	0.226385	0.490886
REACTOME_CASPASE_MEDIATED_CLEAVAGE_OF_CYTOSKELETAL_PROTEINS	-0.0835782	0.316275	0.591462	0.00797728	-0.0827104	0.321327	0.603367	0.0253228	0.761409	0.894743
NABA_CORE_MATRISOME	-0.0177798	0.317945	0.591462	0.000714792	-0.0212412	0.232831	0.521302	-0.00329802	0.853036	0.931182
BIOCARTA_VITCB_PATHWAY	-0.085589	0.325794	0.600617	0.00544018	-0.0897339	0.302913	0.589228	0.0554602	0.524306	0.750534
PID_NFAT_3PATHWAY	-0.040246	0.325733	0.600617	0.00146515	-0.0309924	0.44918	0.720519	-0.0758621	0.0639648	0.232602
PID_TRKR_PATHWAY	-0.0370335	0.32621	0.600617	0.00145389	-0.0194425	0.606253	0.830239	-0.048157	0.201722	0.453607
PID_ALK2_PATHWAY	-0.0858672	0.324224	0.600617	0.00384308	-0.0995812	0.252931	0.541569	-0.116876	0.179656	0.421068
REACTOME_SYNTHESIS_OF_DNA	-0.0308769	0.326626	0.600617	0.000737916	-0.0342659	0.279147	0.567569	-0.0276147	0.38033	0.624642
BIOCARTA_EPO_PATHWAY	-0.0646672	0.329432	0.604905	0.00364061	-0.0271485	0.682223	0.869273	-0.0733943	0.268349	0.519015
PID_INTEGRIN_A9B1_PATHWAY	-0.0562472	0.330712	0.605694	0.00145301	-0.0629557	0.276291	0.567569	-0.0412007	0.476167	0.715091
KEGG_LYSINE_DEGRADATION	-0.0425385	0.335203	0.610803	0.000966666	-0.0464902	0.292246	0.580856	-0.0325115	0.461409	0.699521
PID_TAP63_PATHWAY	-0.0379647	0.335463	0.610803	0.000650769	-0.0385449	0.328131	0.608638	-0.0322363	0.413451	0.654845
BIOCARTA_VIP_PATHWAY	-0.0591405	0.337273	0.613136	0.00154231	-0.0437758	0.477536	0.730013	-0.0646673	0.294068	0.535624
SA_TRKA_RECEPTOR	-0.0689927	0.339579	0.613361	0.00205858	-0.0404993	0.575076	0.808625	-0.0441195	0.541398	0.760995
PID_CXCR4_PATHWAY	-0.0279681	0.340446	0.613361	0.00142453	-0.0120505	0.681266	0.869273	-0.00276339	0.924959	0.968511
PID_P38_ALPHA_BETA_DOWNSTREAM_PATHWAY	-0.0465689	0.340957	0.613361	0.00110254	-0.0367159	0.452777	0.720768	-0.071987	0.14101	0.361978
REACTOME_BASE_EXCISION_REPAIR	-0.0633191	0.339614	0.613361	0.00220475	-0.0764104	0.249174	0.537912	-0.0401662	0.544678	0.763119
REACTOME_KERATAN_SULFATE_KERATIN_METABOLISM	-0.0502557	0.341236	0.613361	0.00148054	-0.0485262	0.358111	0.644497	-0.0761097	0.149489	0.372991
BIOCARTA_EXTRINSIC_PATHWAY	-0.0760188	0.342793	0.613571	0.00500508	-0.097	0.22609	0.512311	-0.0405645	0.612705	0.800409
REACTOME_PLATELET_HOMEOSTASIS	-0.0331761	0.341834	0.613571	0.000823344	-0.0245865	0.481158	0.73292	-0.0555031	0.11178	0.315308
REACTOME_DNA_STRAND_ELONGATION	-0.050137	0.342377	0.613571	0.00265842	-0.0481413	0.361935	0.647764	0.00628174	0.905306	0.960541
BIOCARTA_THELPER_PATHWAY	-0.0752652	0.347599	0.61957	0.00721409	-0.105928	0.186198	0.462959	0.0596515	0.45663	0.697195
REACTOME_INSULIN_RECEPTOR_SIGNALLING_CASCADE	-0.029924	0.347461	0.61957	0.00112968	-0.0253319	0.426415	0.70408	-0.0462344	0.146609	0.367966
REACTOME_TRAFFICKING_AND_PROCESSING_OF_ENDOSOMAL_TLR	-0.0775887	0.352203	0.623429	0.00230487	-0.0906965	0.276819	0.567569	-0.00318706	0.969517	0.988685
KEGG_ADHERENS_JUNCTION	-0.0322897	0.354887	0.62408	0.000896105	-0.0280671	0.421302	0.702398	-0.0346289	0.321115	0.569432
REACTOME_IL_7_SIGNALING	-0.0805805	0.354903	0.62408	0.00314318	-0.0641354	0.461537	0.721963	-0.0915275	0.293351	0.535624
REACTOME_AQUAPORIN_MEDIATED_TRANSPORT	-0.0413075	0.355013	0.62408	0.000627916	-0.0277456	0.534438	0.775269	-0.0243514	0.585583	0.790072
BIOCARTA_CCR5_PATHWAY	-0.0709999	0.357876	0.624597	0.00366846	-0.0268711	0.727863	0.893573	-0.041617	0.58994	0.791889
BIOCARTA_AMI_PATHWAY	-0.0592107	0.359609	0.62528	0.00396012	-0.0798945	0.216411	0.503775	0.0176748	0.784495	0.90111
REACTOME_NFKB_AND_MAP_KINASES_ACTIVATION_MEDIATED_BY_TLR4_SIGNALING_REPERTOIRE	-0.0326916	0.359536	0.62528	0.000447133	-0.0380713	0.285962	0.574622	-0.0376432	0.291415	0.535624
BIOCARTA_GCR_PATHWAY	-0.0653788	0.365479	0.632903	0.00197257	-0.0463233	0.521389	0.768552	-0.0483658	0.50319	0.738735
KEGG_GLYCOSYLPHOSPHATIDYLINOSITOL_GPI_ANCHOR_BIOSYNTHESIS	-0.0517979	0.370392	0.636238	0.00209867	-0.0733497	0.204644	0.492315	-0.0609085	0.292209	0.535624
KEGG_SYSTEMIC_LUPUS_ERYTHEMATOSUS	-0.0259193	0.369876	0.636238	0.000972618	-0.0332346	0.252563	0.541569	0.00908165	0.755725	0.890328
REACTOME_JNK_C_JUN_KINASES_PHOSPHORYLATION_AND_ACTIVATION_MEDIATED_BY_ACTIVATED_HUMAN_TAK1	-0.0647204	0.370328	0.636238	0.00208488	-0.0900181	0.212754	0.499525	-0.0931751	0.197145	0.448857
KEGG_GLYCOSAMINOGLYCAN_DEGRADATION	-0.0561354	0.373508	0.640728	0.00244359	-0.0623908	0.322619	0.603671	-0.0129581	0.83724	0.925026
BIOCARTA_CALCINEURIN_PATHWAY	-0.0662339	0.374675	0.64101	0.00274986	-0.0390462	0.600733	0.825523	-0.0641447	0.389928	0.63494
REACTOME_PI_3K_CASCADE	-0.0349128	0.375756	0.642001	0.00130021	-0.0306361	0.437018	0.71334	-0.055786	0.156983	0.38491
REACTOME_DESTABILIZATION_OF_MRNA_BY_BRF1	-0.0618649	0.377434	0.644006	0.00315952	-0.0447326	0.52334	0.769653	-0.0655082	0.349988	0.595774
PID_INSULIN_GLUCOSE_PATHWAY	-0.0515277	0.382599	0.648491	0.00119849	-0.0519146	0.379037	0.669074	-0.0372166	0.528289	0.750534
REACTOME_MEIOTIC_RECOMBINATION	-0.0331826	0.387174	0.651921	0.00196808	-0.03514	0.36401	0.649727	-0.0321974	0.409754	0.653045
BIOCARTA_CDMAC_PATHWAY	-0.0642904	0.388852	0.653796	0.00266783	-0.0376405	0.613906	0.833122	-0.0580544	0.436499	0.673698
BIOCARTA_LONGEVITY_PATHWAY	-0.0642169	0.389394	0.653796	0.00182455	-0.0508561	0.495468	0.746326	-0.0676681	0.364421	0.61056
KEGG_LEISHMANIA_INFECTION	-0.0296936	0.391522	0.65411	0.000888235	-0.0375375	0.278718	0.567569	0.00644974	0.852353	0.931182
BIOCARTA_TCR_PATHWAY	-0.0381971	0.392404	0.65411	0.0015657	-0.0209073	0.639691	0.843679	-0.0239618	0.591596	0.791889
REACTOME_GAMMA_CARBOXYLATION_TRANSPORT_AND_AMINO_TERMINAL_CLEAVAGE_OF_PROTEINS	-0.0781001	0.392568	0.65411	0.00339699	-0.113477	0.214147	0.499525	-0.047451	0.603447	0.792419
BIOCARTA_NKCELLS_PATHWAY	-0.0563919	0.395071	0.657423	0.00231548	-0.0158644	0.810909	0.940419	-0.0349101	0.59855	0.792419
PID_PRL_SIGNALING_EVENTS_PATHWAY	-0.051991	0.398912	0.661285	0.00225831	-0.0593921	0.335222	0.613774	-0.103745	0.0923189	0.284837
REACTOME_NUCLEOTIDE_EXCISION_REPAIR	-0.0372848	0.398297	0.661285	0.000864753	-0.0329555	0.455313	0.720768	-0.0363059	0.410799	0.653878
PID_RHODOPSIN_PATHWAY	-0.0495197	0.401417	0.664523	0.0063861	-0.0589306	0.31801	0.599435	0.020419	0.729349	0.875631
REACTOME_GLYCOSPHINGOLIPID_METABOLISM	-0.0398103	0.402647	0.665625	0.00182302	-0.0488164	0.304782	0.591065	-0.0200767	0.672983	0.838088
KEGG_BASAL_TRANSCRIPTION_FACTORS	-0.0431018	0.406714	0.667438	0.00213467	-0.0327276	0.528701	0.772076	-0.0942872	0.0695269	0.242204
KEGG_THYROID_CANCER	-0.0446795	0.405434	0.667438	0.00191456	-0.0301698	0.574269	0.808625	-0.0329219	0.539862	0.760579
BIOCARTA_MYOSIN_PATHWAY	-0.04328	0.404777	0.667438	0.00202965	-0.0276438	0.594636	0.825523	-0.0160775	0.756953	0.890328
REACTOME_SIGNALING_BY_INSULIN_RECEPTOR	-0.0235568	0.408331	0.667438	0.00109705	-0.0184633	0.516953	0.76466	-0.044391	0.119211	0.328001
REACTOME_FORMATION_OF_THE_TERNARY_COMPLEX_AND_SUBSEQUENTLY_THE_43S_COMPLEX	-0.0435023	0.410035	0.668399	0.0026908	-0.0273071	0.611122	0.832942	-0.0339554	0.527213	0.750534
REACTOME_MEIOTIC_SYNAPSIS	-0.0326555	0.41175	0.67034	0.00213248	-0.0294964	0.458446	0.720768	-0.0499578	0.213539	0.471042
PID_EPHA2_FWD_PATHWAY	-0.0555828	0.41453	0.673508	0.00259134	-0.0418881	0.538614	0.77606	-0.0821339	0.227928	0.491951
REACTOME_SYNTHESIS_OF_PIPS_AT_THE_EARLY_ENDOSOME_MEMBRANE	-0.0680176	0.41475	0.673508	0.00275772	-0.077645	0.351854	0.639644	-0.0182439	0.826843	0.919115
PID_PDGFRB_PATHWAY	-0.0214478	0.417277	0.675219	0.000650882	-0.00819928	0.75649	0.91121	-0.0447981	0.0915388	0.284216
REACTOME_SIGNALING_BY_BMP	-0.0524145	0.417389	0.675219	0.00373983	-0.051883	0.422128	0.702398	-0.12908	0.0458118	0.190093
REACTOME_ENOS_ACTIVATION_AND_REGULATION	-0.0580822	0.421412	0.680006	0.00265074	-0.0561473	0.437046	0.71334	-0.0213009	0.768111	0.895562
REACTOME_APOPTOTIC_EXECUTION_PHASE	-0.0321483	0.423445	0.681566	0.00108529	-0.0288651	0.472321	0.724641	0.00231205	0.954093	0.983811
PID_FAK_PATHWAY	-0.0308581	0.425368	0.683799	0.00109337	-0.0177361	0.646832	0.848719	-0.0464807	0.234042	0.496511
BIOCARTA_RAS_PATHWAY	-0.0500881	0.427164	0.685823	0.00219609	-0.0302943	0.631043	0.840781	-0.0274851	0.663036	0.828795
BIOCARTA_CELL2CELL_PATHWAY	-0.0630004	0.431749	0.688363	0.00564637	-0.0456174	0.569171	0.804647	-0.0337935	0.67323	0.838088
SA_B_CELL_RECEPTOR_COMPLEXES	-0.0464694	0.431044	0.688363	0.00210314	-0.0137252	0.816096	0.941659	-0.0337998	0.566832	0.776273
ST_G_ALPHA_I_PATHWAY	-0.0384718	0.431457	0.688363	0.0016175	-0.0177443	0.716718	0.882433	-0.0282676	0.56324	0.774682
REACTOME_APOPTOSIS	-0.0197921	0.429548	0.688363	0.000260295	-0.0162159	0.519016	0.766824	-0.0256558	0.305837	0.548116
REACTOME_CHYLOMICRON_MEDIATED_LIPID_TRANSPORT	-0.0585906	0.432274	0.688363	0.00207027	-0.059405	0.425903	0.70408	0.00419783	0.955131	0.983811
BIOCARTA_EGF_PATHWAY	-0.0405284	0.4353	0.690709	0.00162576	-0.00727699	0.888598	0.972098	-0.0541974	0.296822	0.537411
REACTOME_ANTIVIRAL_MECHANISM_BY_IFN_STIMULATED_GENES	-0.0288652	0.43657	0.690709	0.000878736	-0.0337924	0.362403	0.647764	-0.0595928	0.108234	0.310937
REACTOME_TGF_BETA_RECEPTOR_SIGNALING_IN_EMT_EPITHELIAL_TO_MESENCHYMAL_TRANSITION	-0.0677478	0.436692	0.690709	0.00264591	-0.0631997	0.468099	0.72425	-0.102413	0.239684	0.501391
REACTOME_GLUCAGON_SIGNALING_IN_METABOLIC_REGULATION	-0.0433431	0.436074	0.690709	0.00106917	-0.0168179	0.762498	0.913311	-0.0598492	0.282179	0.529085
PID_P75_NTR_PATHWAY	-0.0272687	0.437951	0.690802	0.000634147	-0.0247989	0.48056	0.732882	-0.0237886	0.49862	0.734111
BIOCARTA_IGF1MTOR_PATHWAY	-0.0511352	0.4406	0.692543	0.00280981	0.00256606	0.96913	0.994818	-0.0537261	0.417795	0.657674
PID_THROMBIN_PAR4_PATHWAY	-0.0617287	0.441103	0.692543	0.00306767	-0.0355671	0.657149	0.855231	-0.0401401	0.616427	0.803624
REACTOME_ELONGATION_ARREST_AND_RECOVERY	-0.0498345	0.440682	0.692543	0.00337511	-0.048896	0.449338	0.720519	-0.0766442	0.235686	0.499168
REACTOME_TCR_SIGNALING	-0.0310329	0.444112	0.695559	0.00137833	-0.0209201	0.605934	0.830239	0.0078429	0.846642	0.928975
REACTOME_ANTIGEN_PRESENTATION_FOLDING_ASSEMBLY_AND_PEPTIDE_LOADING_OF_CLASS_I_MHC	-0.0495097	0.443666	0.695559	0.00147859	-0.0609605	0.345588	0.630045	-0.0721595	0.264228	0.517498
REACTOME_APOPTOTIC_CLEAVAGE_OF_CELLULAR_PROTEINS	-0.0356028	0.44818	0.70107	0.00191209	-0.0272217	0.561977	0.800677	0.019863	0.672189	0.838088
PID_REG_GR_PATHWAY	-0.0245447	0.449221	0.701164	0.000408037	-0.0262203	0.418877	0.700686	-0.0127225	0.694886	0.849324
REACTOME_ZINC_TRANSPORTERS	-0.0564429	0.449337	0.701164	0.00250787	-0.0576233	0.439913	0.715278	-0.0428081	0.566125	0.776273
PID_ERBB1_INTERNALIZATION_PATHWAY	-0.0362957	0.45164	0.703041	0.00124877	-0.0238378	0.621068	0.837263	-0.0425819	0.377214	0.623479
REACTOME_ARMS_MEDIATED_ACTIVATION	-0.0541774	0.453301	0.703056	0.00273507	-0.0404917	0.575149	0.808625	-0.0687776	0.341088	0.58848
REACTOME_DCC_MEDIATED_ATTRACTIVE_SIGNALING	-0.0622322	0.455551	0.703991	0.00361672	-0.0676062	0.417579	0.700391	-0.0832823	0.317992	0.565468
BIOCARTA_PDGF_PATHWAY	-0.0380431	0.456885	0.705176	0.00234692	-0.00307893	0.951986	0.986866	-0.0615208	0.22893	0.491951
REACTOME_CTLA4_INHIBITORY_SIGNALING	-0.0479103	0.45853	0.705176	0.00207236	-0.0365064	0.572191	0.807131	-0.126264	0.0507538	0.200966
REACTOME_REGULATION_OF_MITOTIC_CELL_CYCLE	-0.0257104	0.458137	0.705176	0.00153653	-0.024329	0.485764	0.7373	-0.0649136	0.0610432	0.226238
REACTOME_P2Y_RECEPTORS	-0.0637966	0.463906	0.70925	0.00623135	-0.0556694	0.522743	0.769653	-0.0174877	0.840878	0.926638
BIOCARTA_INTRINSIC_PATHWAY	-0.0440113	0.46533	0.710504	0.00304874	-0.0674423	0.26323	0.551397	0.0298029	0.621027	0.806323
REACTOME_YAP1_AND_WWTR1_TAZ_STIMULATED_GENE_EXPRESSION	-0.0438887	0.466574	0.710525	0.00184761	-0.0410587	0.495799	0.746326	-0.0965439	0.109255	0.310937
REACTOME_SHC_RELATED_EVENTS	-0.0525466	0.467012	0.710525	0.00365903	-0.0296408	0.681595	0.869273	-0.07156	0.321914	0.570025
ST_INTEGRIN_SIGNALING_PATHWAY	-0.0234427	0.469839	0.713855	0.00078552	-0.000200816	0.99506	0.998251	-0.0221354	0.494966	0.732964
REACTOME_SIGNALLING_TO_ERKS	-0.0352582	0.470918	0.713855	0.0018316	-0.016231	0.739963	0.90064	-0.0496672	0.309805	0.554
REACTOME_HEPARAN_SULFATE_HEPARIN_HS_GAG_METABOLISM	-0.0291729	0.471894	0.713855	0.000711127	-0.0254689	0.529965	0.772076	-0.0394874	0.33018	0.575896
REACTOME_DOWNSTREAM_TCR_SIGNALING	-0.0356841	0.471993	0.713855	0.00151422	-0.0265674	0.592314	0.825523	0.0128478	0.795669	0.903365
REACTOME_SYNTHESIS_OF_PIPS_AT_THE_PLASMA_MEMBRANE	-0.0379229	0.472652	0.714006	0.00133894	-0.0203185	0.700397	0.876382	-0.0154914	0.769239	0.895562
BIOCARTA_AT1R_PATHWAY	-0.0376899	0.482801	0.719365	0.00214828	-0.00919131	0.864108	0.959453	-0.0772526	0.150298	0.374276
BIOCARTA_CTL_PATHWAY	-0.0542997	0.481957	0.719365	0.00867331	-0.0820492	0.288008	0.576015	0.086781	0.261108	0.517498
BIOCARTA_INSULIN_PATHWAY	-0.0445721	0.47981	0.719365	0.00320164	-0.00229303	0.971002	0.995495	-0.101073	0.109085	0.310937
PID_NFKAPPAB_ATYPICAL_PATHWAY	-0.0507856	0.482072	0.719365	0.00281525	-0.0272269	0.706267	0.876382	-0.062661	0.385749	0.629744
PID_S1P_S1P1_PATHWAY	-0.045698	0.479541	0.719365	0.00239945	-0.048025	0.457455	0.720768	-0.0336196	0.60295	0.792419
REACTOME_PROCESSING_OF_CAPPED_INTRON_CONTAINING_PRE_MRNA	-0.0196095	0.483163	0.719365	0.00184924	-0.0084031	0.764855	0.913311	-0.0796765	0.00438352	0.0410955
REACTOME_ACTIVATION_OF_GENES_BY_ATF4	-0.0414981	0.481951	0.719365	0.00159554	-0.0182202	0.757524	0.911596	0.00175955	0.976215	0.989602
REACTOME_TRANSCRIPTION_COUPLED_NER_TC_NER	-0.032645	0.486778	0.721696	0.00112861	-0.0255523	0.586205	0.820559	-0.0396873	0.397852	0.641842
REACTOME_SIGNALLING_TO_RAS	-0.0380775	0.493836	0.728779	0.00233849	-0.0231521	0.677393	0.868313	-0.0497655	0.371192	0.617845
BIOCARTA_SRCRPTP_PATHWAY	-0.0590887	0.497531	0.731965	0.00335674	-0.0458444	0.598662	0.825523	-0.126213	0.147334	0.369059
REACTOME_PLATELET_ACTIVATION_SIGNALING_AND_AGGREGATION	-0.0145968	0.497713	0.731965	0.000295377	-0.005909	0.783701	0.925665	-0.000276979	0.989734	0.993631
BIOCARTA_TCYTOTOXIC_PATHWAY	-0.0540327	0.500127	0.733826	0.00685879	-0.0816889	0.308004	0.594605	0.0889892	0.266774	0.519015
REACTOME_GLUCOSE_TRANSPORT	-0.0315104	0.502047	0.734955	0.00211608	-0.0312334	0.505814	0.754294	-0.0707439	0.131793	0.352278
BIOCARTA_EDG1_PATHWAY	-0.0377586	0.505508	0.736646	0.00194393	-0.0215774	0.703573	0.876382	-0.0340317	0.548423	0.764759
PID_VEGF_VEGFR_PATHWAY	-0.0607173	0.506257	0.736897	0.00566066	-0.0545087	0.5507	0.789894	-0.0500123	0.584044	0.790072
PID_PI3KCI_PATHWAY	-0.0289434	0.507179	0.7374	0.00172864	-0.0046724	0.914735	0.979089	-0.0300998	0.490362	0.72853
KEGG_OTHER_GLYCAN_DEGRADATION	-0.0474397	0.5114	0.742692	0.00489994	-0.061113	0.397594	0.682978	-0.0185645	0.797202	0.9043
BIOCARTA_PLATELETAPP_PATHWAY	-0.0503281	0.514577	0.746458	0.00456213	-0.0769534	0.319	0.600416	0.04491	0.56086	0.772242
KEGG_ENDOMETRIAL_CANCER	-0.0260267	0.51696	0.748217	0.00105244	0.00829149	0.83644	0.947669	-0.00328093	0.934892	0.973846
PID_AR_NONGENOMIC_PATHWAY	-0.0344447	0.521277	0.753611	0.00194355	-0.0137986	0.797228	0.932844	-0.0220277	0.681684	0.841661
PID_TCR_CALCIUM_PATHWAY	-0.0348926	0.530665	0.763728	0.00187353	-0.0266353	0.632214	0.840781	-0.0639063	0.250828	0.510461
REACTOME_P38MAPK_EVENTS	-0.050293	0.530252	0.763728	0.00453595	-0.0503314	0.529938	0.772076	-0.0477032	0.551641	0.767841
REACTOME_IL_2_SIGNALING	-0.0282436	0.53708	0.768632	0.000883587	-0.0118944	0.794912	0.932844	-0.024302	0.595355	0.791889
KEGG_MELANOGENESIS	-0.0182147	0.538852	0.769445	0.000712054	-0.00572298	0.84689	0.954432	-0.0330046	0.265475	0.518346
REACTOME_GENERATION_OF_SECOND_MESSENGER_MOLECULES	-0.0342202	0.538615	0.769445	0.00302093	-0.0271173	0.626064	0.839569	0.024636	0.657991	0.824916
REACTOME_DESTABILIZATION_OF_MRNA_BY_TRISTETRAPROLIN_TTP	-0.04286	0.540875	0.771472	0.00354213	-0.0120929	0.86302	0.959078	-0.0732498	0.295993	0.536907
REACTOME_RNA_POL_I_TRANSCRIPTION_TERMINATION	-0.0393247	0.542901	0.771776	0.00265919	-0.0206514	0.749333	0.905149	-0.078638	0.223723	0.485939
REACTOME_TRANSCRIPTIONAL_REGULATION_OF_WHITE_ADIPOCYTE_DIFFERENTIATION	-0.0209478	0.54269	0.771776	0.000898227	-0.0182024	0.596829	0.825523	-0.0528469	0.124602	0.3373
REACTOME_SYNTHESIS_SECRETION_AND_INACTIVATION_OF_GLP1	-0.0425645	0.543669	0.77201	0.0050522	-0.0263462	0.707003	0.876382	-0.028748	0.681695	0.841661
KEGG_LYSOSOME	-0.0160899	0.551177	0.777205	0.000794058	-0.0221831	0.411251	0.69521	0.00264593	0.921925	0.968511
REACTOME_INTRINSIC_PATHWAY_FOR_APOPTOSIS	-0.0337629	0.551585	0.777205	0.00145974	-0.0424135	0.454501	0.720768	-0.0343622	0.544545	0.763119
PID_SYNDECAN_2_PATHWAY	-0.0308487	0.552631	0.777822	0.00120343	-0.0436797	0.400452	0.683282	-0.0288396	0.578793	0.786739
REACTOME_METABOLISM_OF_MRNA	-0.0134998	0.554495	0.778011	0.000687661	-0.0053432	0.816135	0.941659	-0.0534527	0.0196404	0.109831
BIOCARTA_HER2_PATHWAY	-0.0360538	0.558561	0.780153	0.00141133	-0.00386503	0.949997	0.986268	0.0061309	0.920761	0.968511
REACTOME_EFFECTS_OF_PIP2_HYDROLYSIS	-0.0348583	0.563089	0.783704	0.00204185	-0.0178763	0.766812	0.914166	-0.0239592	0.691032	0.847564
REACTOME_SIGNALING_BY_NOTCH	-0.0174824	0.563555	0.783704	0.00149581	-0.00204746	0.946071	0.986268	-0.0699902	0.0207636	0.112176
REACTOME_EARLY_PHASE_OF_HIV_LIFE_CYCLE	-0.0463272	0.563176	0.783704	0.00328807	-0.0268557	0.73752	0.899848	-0.0233922	0.779107	0.899823
PID_REELIN_PATHWAY	-0.0314466	0.565018	0.784884	0.00229856	-0.0257508	0.637511	0.842819	-0.02209	0.686067	0.843525
PID_SYNDECAN_4_PATHWAY	-0.0297243	0.567201	0.785727	0.00111942	-0.0389565	0.453318	0.720768	-0.0248208	0.632802	0.815796
PID_PI3KCI_AKT_PATHWAY	-0.0283682	0.56747	0.785727	0.00280511	-0.033062	0.505163	0.754203	-0.0549663	0.267912	0.519015
PID_RAC1_PATHWAY	-0.0229393	0.57161	0.788896	0.000893143	-0.0204107	0.614737	0.833122	-0.018665	0.648556	0.821814
REACTOME_MRNA_CAPPING	-0.0333282	0.572255	0.788934	0.00253994	-0.0124468	0.83296	0.945578	-0.10076	0.0877593	0.279733
REACTOME_PLATELET_SENSITIZATION_BY_LDL	-0.043347	0.574575	0.791279	0.00333433	-0.0302245	0.695506	0.876382	-0.161222	0.0368195	0.163739
PID_IL8_CXCR1_PATHWAY	-0.0310399	0.577008	0.792069	0.00180233	-0.0093377	0.866748	0.960693	-0.0546277	0.326291	0.573031
REACTOME_GAB1_SIGNALOSOME	-0.0269795	0.575828	0.792069	0.00179872	-0.0106113	0.825831	0.944018	-0.046154	0.338507	0.585674
PID_P38_ALPHA_BETA_PATHWAY	-0.029386	0.577867	0.792397	0.00223492	-0.0136658	0.795792	0.932844	-0.0749877	0.155581	0.382946
REACTOME_REGULATION_OF_MRNA_STABILITY_BY_PROTEINS_THAT_BIND_AU_RICH_ELEMENTS	-0.018562	0.579396	0.792792	0.00097084	-0.0059057	0.860941	0.959078	-0.0639234	0.0562927	0.21363
PID_AVB3_INTEGRIN_PATHWAY	-0.0180019	0.593356	0.808431	0.000709319	-0.0137238	0.68395	0.869338	0.0111817	0.740135	0.884416
REACTOME_DESTABILIZATION_OF_MRNA_BY_KSRP	-0.0374404	0.593226	0.808431	0.00312712	-0.0108595	0.876874	0.968216	-0.0307032	0.661352	0.827614
BIOCARTA_IL7_PATHWAY	-0.0371953	0.595647	0.809694	0.00208547	-0.00504562	0.942613	0.986268	-0.0325863	0.641994	0.820182
PID_INTEGRIN3_PATHWAY	-0.0235842	0.59745	0.809694	0.00177968	-0.0412318	0.355896	0.642423	0.0334265	0.454191	0.695191
PID_IL2_1PATHWAY	-0.0208296	0.597187	0.809694	0.000674298	-0.00080069	0.983793	0.998251	-0.0288297	0.464529	0.703414
PID_LYMPH_ANGIOGENESIS_PATHWAY	-0.0304489	0.598505	0.810265	0.00188509	-0.0123456	0.830943	0.944791	-0.0078011	0.892688	0.955648
REACTOME_PERK_REGULATED_GENE_EXPRESSION	-0.0289091	0.603432	0.810751	0.00158394	-0.000943546	0.986473	0.998251	0.0133425	0.810521	0.907897
NABA_ECM_AFFILIATED	-0.0119592	0.601664	0.810751	0.00084443	-0.0165904	0.468972	0.724622	0.0261899	0.252974	0.511159
PID_INTEGRIN_A4B1_PATHWAY	-0.0261331	0.609304	0.815382	0.00109103	-0.0267928	0.6003	0.825523	-0.0237735	0.641987	0.820182
REACTOME_METAL_ION_SLC_TRANSPORTERS	-0.0313618	0.610856	0.815751	0.00133399	-0.0360234	0.558893	0.79717	-0.0063652	0.917743	0.967844
REACTOME_ANTIGEN_ACTIVATES_B_CELL_RECEPTOR_LEADING_TO_GENERATION_OF_SECOND_MESSENGERS	-0.0286303	0.613645	0.818621	0.00181858	-0.00313981	0.955845	0.98745	0.00126568	0.982193	0.990741
PID_ARF_3PATHWAY	-0.0353071	0.61445	0.81884	0.00210771	-0.0274642	0.69518	0.876382	-0.0548589	0.433816	0.672522
KEGG_NON_SMALL_CELL_LUNG_CANCER	-0.0194758	0.621233	0.825216	0.00136805	0.00448478	0.909413	0.976995	-0.00739965	0.851089	0.931182
BIOCARTA_MTOR_PATHWAY	-0.0309425	0.623755	0.825216	0.00308825	0.0124174	0.843941	0.952789	-0.029881	0.635709	0.81739
REACTOME_NITRIC_OXIDE_STIMULATES_GUANYLATE_CYCLASE	-0.028418	0.623122	0.825216	0.00153973	-0.0265349	0.64633	0.848719	-0.05145	0.373616	0.620261
REACTOME_CLEAVAGE_OF_GROWING_TRANSCRIPT_IN_THE_TERMINATION_REGION_	-0.0249018	0.626267	0.826827	0.00399986	-0.00538691	0.917411	0.980328	-0.0753064	0.140828	0.361978
SA_PTEN_PATHWAY	-0.0336711	0.63095	0.829582	0.00242364	0.0265265	0.705091	0.876382	-0.022875	0.744152	0.887552
BIOCARTA_PAR1_PATHWAY	-0.0227974	0.636383	0.833297	0.00193729	0.00226019	0.962616	0.989721	0.0217708	0.65165	0.821814
ST_MYOCYTE_AD_PATHWAY	-0.025488	0.646954	0.844543	0.00171838	-0.013994	0.801458	0.932844	-0.0473322	0.395037	0.639178
REACTOME_FORMATION_OF_THE_HIV1_EARLY_ELONGATION_COMPLEX	-0.027651	0.64645	0.844543	0.00268867	-0.00740822	0.902191	0.974307	-0.0710291	0.238681	0.500524
KEGG_TGF_BETA_SIGNALING_PATHWAY	-0.0142712	0.657986	0.85112	0.0012641	-0.00701358	0.82777	0.944791	-0.0569398	0.0773491	0.260211
SIG_PIP3_SIGNALING_IN_CARDIAC_MYOCTES	-0.0159477	0.657335	0.85112	0.000684861	0.00409238	0.909371	0.976995	-0.0303735	0.398194	0.641842
PID_TCR_JNK_PATHWAY	-0.0344327	0.655677	0.85112	0.00230753	-0.0337355	0.662212	0.858404	-0.0402683	0.602048	0.792419
REACTOME_SIGNALING_BY_ACTIVATED_POINT_MUTANTS_OF_FGFR1	-0.0388768	0.655357	0.85112	0.00409767	-0.0711978	0.4137	0.698426	-0.0964746	0.268037	0.519015
BIOCARTA_CTCF_PATHWAY	-0.026915	0.662328	0.855005	0.00353301	0.00438371	0.943297	0.986268	-0.0816095	0.18546	0.429929
REACTOME_REGULATION_OF_INSULIN_LIKE_GROWTH_FACTOR_IGF_ACTIVITY_BY_INSULIN_LIKE_GROWTH_FACTOR_BINDING_PROTEINS_IGFBPS	-0.0312309	0.665525	0.855776	0.00290145	-0.0356103	0.622071	0.837731	-0.0810492	0.261913	0.517498
REACTOME_HIV_INFECTION	-0.00975109	0.665733	0.855776	0.000513628	-0.000334839	0.988199	0.998251	-0.0487798	0.0311799	0.146264
REACTOME_ASSEMBLY_OF_THE_PRE_REPLICATIVE_COMPLEX	-0.0163454	0.66744	0.856414	0.00105931	-0.0184205	0.631194	0.840781	-0.0468166	0.218458	0.479405
REACTOME_ANDROGEN_BIOSYNTHESIS	-0.0389277	0.670003	0.857163	0.00609728	-0.0774688	0.396407	0.68276	-0.0575613	0.528611	0.750534
REACTOME_DOWNSTREAM_SIGNALING_OF_ACTIVATED_FGFR	-0.0128218	0.670206	0.857163	0.000902576	0.00193053	0.948874	0.986268	-0.0369262	0.220025	0.480477
REACTOME_PIP3_ACTIVATES_AKT_SIGNALING	-0.0236615	0.670707	0.857163	0.0025577	-0.0099925	0.857501	0.958854	-0.0301804	0.587601	0.79112
REACTOME_MTORC1_MEDIATED_SIGNALLING	-0.0364393	0.675692	0.859873	0.00164879	-0.0217164	0.803114	0.933436	-0.0159946	0.854304	0.931769
REACTOME_CYCLIN_E_ASSOCIATED_EVENTS_DURING_G1_S_TRANSITION_	-0.0159578	0.680172	0.86236	0.00161765	-0.0181583	0.642007	0.845861	-0.0435073	0.261057	0.517498
REACTOME_BASIGIN_INTERACTIONS	-0.0242438	0.681218	0.862831	0.00194791	-0.0466168	0.429585	0.707477	0.027626	0.639705	0.818899
KEGG_REGULATION_OF_AUTOPHAGY	-0.021475	0.684238	0.863405	0.00510306	-0.013371	0.800102	0.932844	-0.0216585	0.681688	0.841661
KEGG_RENAL_CELL_CARCINOMA	-0.0145968	0.682462	0.863405	0.0012046	0.00143366	0.967949	0.994404	-0.0306283	0.390662	0.635325
REACTOME_ACTIVATION_OF_KAINATE_RECEPTORS_UPON_GLUTAMATE_BINDING	-0.0250538	0.684373	0.863405	0.00230096	-0.0163692	0.790552	0.931176	-0.0280939	0.648513	0.821814
REACTOME_METABOLISM_OF_PROTEINS	-0.00608699	0.689272	0.866505	0.000362251	-0.00464095	0.760774	0.913311	-0.0282961	0.0634073	0.232602
REACTOME_DOWNREGULATION_OF_TGF_BETA_RECEPTOR_SIGNALING	-0.0269098	0.692819	0.867258	0.00363298	-0.0104516	0.878061	0.968216	-0.0851257	0.211434	0.468833
REACTOME_APOPTOSIS_INDUCED_DNA_FRAGMENTATION	-0.0316509	0.692856	0.867258	0.00306164	-0.0547626	0.494355	0.746326	-0.0429504	0.591965	0.791889
BIOCARTA_CCR3_PATHWAY	-0.0237331	0.700182	0.868607	0.00118213	-0.00331288	0.957133	0.98745	-0.0294551	0.632711	0.815796
BIOCARTA_TFF_PATHWAY	-0.0246354	0.703085	0.868607	0.00132087	-0.00659961	0.91867	0.980328	-0.00864417	0.893606	0.955829
BIOCARTA_TRKA_PATHWAY	-0.032417	0.697502	0.868607	0.00464341	0.0274101	0.742413	0.901905	0.00601659	0.942489	0.978562
PID_GLYPICAN_1PATHWAY	-0.0216125	0.697751	0.868607	0.00162954	-0.0196462	0.724069	0.88977	-0.0785155	0.158287	0.385882
PID_DNA_PK_PATHWAY	-0.0284011	0.70345	0.868607	0.0033059	-0.0134404	0.857039	0.958854	-0.0273247	0.714185	0.865653
REACTOME_PI_METABOLISM	-0.0165642	0.701102	0.868607	0.000844246	-0.00633143	0.883357	0.969872	-0.0080506	0.852012	0.931182
REACTOME_ABACAVIR_TRANSPORT_AND_METABOLISM	-0.0350594	0.701128	0.868607	0.00643178	-0.0333497	0.715051	0.881871	0.0636642	0.485842	0.724031
REACTOME_NUCLEOTIDE_LIKE_PURINERGIC_RECEPTORS	-0.0285971	0.701501	0.868607	0.00354879	-0.0188509	0.800528	0.932844	-0.00184345	0.980288	0.989602
REACTOME_PI3K_CASCADE	-0.0135326	0.702375	0.868607	0.00101905	-0.0159465	0.652511	0.854416	-0.0284997	0.420972	0.660196
REACTOME_CLASS_I_MHC_MEDIATED_ANTIGEN_PROCESSING_PRESENTATION	-0.00748368	0.707607	0.871216	0.000593302	-0.00866716	0.666163	0.859955	-0.0369192	0.0648752	0.233661
REACTOME_TGF_BETA_RECEPTOR_SIGNALING_ACTIVATES_SMADS	-0.0235235	0.709207	0.872345	0.0037419	-0.011138	0.859845	0.959078	-0.0813801	0.197006	0.448857
PID_P53_DOWNSTREAM_PATHWAY	-0.00932701	0.711718	0.873486	0.000406458	-0.00710119	0.778437	0.922004	-0.0175874	0.48591	0.724031
REACTOME_NEF_MEDIATES_DOWN_MODULATION_OF_CELL_SURFACE_RECEPTORS_BY_RECRUITING_THEM_TO_CLATHRIN_ADAPTERS	-0.0275764	0.71167	0.873486	0.004018	-0.0316987	0.670934	0.86325	0.00148375	0.984133	0.991781
REACTOME_DOWNSTREAM_SIGNAL_TRANSDUCTION	-0.011338	0.715585	0.876814	0.000930375	0.0102695	0.74138	0.901507	-0.0333089	0.284425	0.531688
ST_ERK1_ERK2_MAPK_PATHWAY	-0.0187974	0.717471	0.878283	0.00128089	0.00422196	0.935227	0.986268	-0.00301416	0.953732	0.983811
REACTOME_INFLAMMASOMES	-0.0257411	0.721609	0.880818	0.00403459	-0.0272729	0.705794	0.876382	0.0524129	0.468146	0.707211
PID_TXA2PATHWAY	-0.0138325	0.72564	0.883905	0.00143971	-0.00258	0.947812	0.986268	-0.026411	0.502827	0.738735
PID_MTOR_4PATHWAY	-0.0126164	0.72564	0.883905	0.00103287	-0.00999611	0.780977	0.923301	-0.0227277	0.527269	0.750534
REACTOME_FGFR1_LIGAND_BINDING_AND_ACTIVATION	-0.0266643	0.729875	0.884476	0.00388977	-0.0539173	0.485048	0.737234	-0.0688012	0.372958	0.619975
PID_WNT_NONCANONICAL_PATHWAY	-0.0178059	0.735965	0.889001	0.00150365	-0.0201834	0.702293	0.876382	-0.0754709	0.152935	0.379362
KEGG_INOSITOL_PHOSPHATE_METABOLISM	-0.0127909	0.745555	0.896349	0.000417323	0.00431825	0.912763	0.978757	0.00969735	0.805665	0.90664
REACTOME_INSULIN_RECEPTOR_RECYCLING	-0.0200999	0.74433	0.896349	0.00302821	-0.0136419	0.824825	0.943712	-0.0568907	0.355975	0.601946
REACTOME_SHC_MEDIATED_SIGNALLING	-0.0239343	0.748363	0.89888	0.00381622	0.00076417	0.991828	0.998251	-0.0436746	0.55829	0.772242
PID_HNF3A_PATHWAY	-0.0141622	0.751164	0.901397	0.00113654	-0.00124758	0.977714	0.996427	-0.0250516	0.574849	0.783885
KEGG_PHOSPHATIDYLINOSITOL_SIGNALING_SYSTEM	-0.0106027	0.754746	0.901463	0.000731478	0.00523572	0.877405	0.968216	0.013911	0.68191	0.841661
REACTOME_TRANSCRIPTIONAL_ACTIVITY_OF_SMAD2_SMAD3_SMAD4_HETEROTRIMER	-0.0161447	0.752206	0.901463	0.00307853	-0.0114942	0.822148	0.943362	-0.0600194	0.240492	0.501846
REACTOME_KERATAN_SULFATE_DEGRADATION	-0.0273684	0.753362	0.901463	0.00405221	-0.0546446	0.530425	0.772076	-0.00256827	0.976477	0.989602
ST_WNT_BETA_CATENIN_PATHWAY	-0.0154118	0.756076	0.902209	0.00118013	-0.0146336	0.768032	0.914269	-0.019174	0.699151	0.852216
BIOCARTA_FREE_PATHWAY	-0.028143	0.758019	0.903683	0.00530485	-0.0375031	0.681403	0.869273	0.067598	0.4593	0.697195
REACTOME_PI3K_AKT_ACTIVATION	-0.0143173	0.769697	0.909583	0.00205087	0.00447866	0.927029	0.983368	-0.0285065	0.559947	0.772242
REACTOME_FORMATION_OF_TUBULIN_FOLDING_INTERMEDIATES_BY_CCT_TRIC	-0.0187488	0.766293	0.909583	0.00426209	-0.018832	0.765286	0.913311	-0.0760099	0.228205	0.491951
REACTOME_ACTIVATION_OF_RAC	-0.0234273	0.770014	0.909583	0.0037694	0.0342944	0.668673	0.861456	-0.0663658	0.407558	0.651991
KEGG_TERPENOID_BACKBONE_BIOSYNTHESIS	-0.0216642	0.771532	0.909611	0.00152845	-0.0331535	0.656778	0.855231	-0.0120213	0.871996	0.943798
REACTOME_APC_C_CDH1_MEDIATED_DEGRADATION_OF_CDC20_AND_OTHER_APC_C_CDH1_TARGETED_PROTEINS_IN_LATE_MITOSIS_EARLY_G1	-0.010989	0.772687	0.910133	0.00154983	-0.008666	0.821326	0.943362	-0.0490142	0.197604	0.4491
BIOCARTA_MAPK_PATHWAY	-0.00892531	0.775495	0.911874	0.000776174	-9.9224e-05	0.99747	0.998251	-0.0327031	0.296036	0.536907
REACTOME_PHOSPHORYLATION_OF_CD3_AND_TCR_ZETA_CHAINS	-0.020305	0.778663	0.913402	0.00521451	-0.0324531	0.653276	0.854541	0.0766035	0.288988	0.533307
REACTOME_REGULATION_OF_INSULIN_SECRETION_BY_GLUCAGON_LIKE_PEPTIDE1	-0.0137209	0.779036	0.913402	0.00145356	0.0114907	0.814232	0.941659	-0.0265713	0.58689	0.790999
REACTOME_SIGNALING_BY_FGFR3_MUTANTS	-0.023907	0.783724	0.917215	0.00576497	-0.0465685	0.5929	0.825523	-0.0441398	0.612327	0.800409
REACTOME_FGFR4_LIGAND_BINDING_AND_ACTIVATION	-0.0227032	0.785452	0.917557	0.00392111	-0.0384191	0.645041	0.848109	-0.0899832	0.280615	0.529085
BIOCARTA_VDR_PATHWAY	-0.0220399	0.791573	0.917623	0.00325302	-0.0250919	0.763519	0.913311	-0.0167831	0.840513	0.926638
REACTOME_SHC1_EVENTS_IN_EGFR_SIGNALING	-0.0196799	0.791953	0.917623	0.00176641	0.00257856	0.97243	0.995495	-0.0413448	0.579473	0.786824
REACTOME_COMMON_PATHWAY	-0.0202957	0.792689	0.917623	0.0051687	-0.0405036	0.599927	0.825523	-0.0063494	0.93447	0.973846
REACTOME_SPHINGOLIPID_METABOLISM	-0.00943875	0.789839	0.917623	0.000882948	-0.0120756	0.733121	0.896583	-0.019021	0.591206	0.791889
REACTOME_PHOSPHOLIPASE_C_MEDIATED_CASCADE	-0.0112032	0.786521	0.917623	0.00115743	-0.00332264	0.93598	0.986268	-0.0404557	0.328078	0.573799
REACTOME_FORMATION_OF_RNA_POL_II_ELONGATION_COMPLEX_	-0.013383	0.793535	0.917772	0.00278634	-0.00559352	0.912894	0.978757	-0.0538254	0.292512	0.535624
KEGG_ONE_CARBON_POOL_BY_FOLATE	-0.0176571	0.801105	0.923185	0.00331585	-0.0336026	0.631645	0.840781	-0.0210713	0.763699	0.895562
KEGG_PENTOSE_PHOSPHATE_PATHWAY	-0.0134071	0.813103	0.926402	0.00267315	-0.00170447	0.976021	0.995495	-0.0262015	0.644049	0.821814
BIOCARTA_GH_PATHWAY	-0.0131211	0.813608	0.926402	0.00237077	0.0295319	0.595653	0.825523	-0.0327048	0.55675	0.772242
REACTOME_ORC1_REMOVAL_FROM_CHROMATIN	-0.00852116	0.819807	0.926402	0.00114986	-0.0110045	0.77049	0.915987	-0.0352035	0.346666	0.592493
REACTOME_CDT1_ASSOCIATION_WITH_THE_CDC6_ORC_ORIGIN_COMPLEX	-0.00942089	0.819844	0.926402	0.00133292	-0.0134914	0.74683	0.905149	-0.0438583	0.289031	0.533307
REACTOME_FGFR2C_LIGAND_BINDING_AND_ACTIVATION	-0.0193461	0.816562	0.926402	0.00369589	-0.0440257	0.597577	0.825523	-0.0676841	0.417043	0.657674
REACTOME_SIGNALING_BY_NOTCH2	-0.0185911	0.823601	0.929409	0.00506511	-0.0165237	0.842946	0.952507	-0.0340361	0.683194	0.84243
BIOCARTA_DNAFRAGMENT_PATHWAY	-0.0201861	0.825109	0.929607	0.00252294	-0.0519113	0.569847	0.804712	0.026875	0.768603	0.895562
BIOCARTA_NGF_PATHWAY	-0.0144999	0.831439	0.933081	0.00483932	0.032077	0.637723	0.842819	-0.0484407	0.477021	0.715166
KEGG_ERBB_SIGNALING_PATHWAY	-0.00648718	0.834857	0.934675	0.000887882	0.0121262	0.696763	0.876382	-0.0225214	0.469214	0.707751
REACTOME_SIGNALING_BY_NOTCH4	-0.0169279	0.839156	0.93663	0.00472943	-0.00632149	0.93958	0.986268	-0.0182541	0.826748	0.919115
REACTOME_GPVI_MEDIATED_ACTIVATION_CASCADE	-0.0106664	0.842565	0.937977	0.00209626	0.00678179	0.89951	0.974215	0.0210239	0.695447	0.849324
REACTOME_SIGNALING_BY_PDGF	-0.00527621	0.846355	0.940557	0.000616026	0.00993891	0.715104	0.881871	0.000684899	0.979933	0.989602
PID_ECADHERIN_STABILIZATION_PATHWAY	-0.0087265	0.848754	0.941587	0.000734805	-0.00418101	0.927198	0.983368	0.0212782	0.646098	0.821814
PID_HDAC_CLASSI_PATHWAY	-0.00689995	0.850113	0.941978	0.00162125	0.00177052	0.961326	0.989721	-0.0427389	0.241794	0.502097
REACTOME_CREB_PHOSPHORYLATION_THROUGH_THE_ACTIVATION_OF_RAS	-0.0110617	0.851318	0.941978	0.0011994	0.0105803	0.857719	0.958854	0.0106187	0.857208	0.932411
REACTOME_TRAF6_MEDIATED_INDUCTION_OF_TAK1_COMPLEX	-0.0171992	0.850657	0.941978	0.00419905	-0.0443396	0.6274	0.840383	0.0715319	0.433589	0.672522
BIOCARTA_AKAP13_PATHWAY	-0.0166728	0.855176	0.943795	0.00274106	-0.0163073	0.858317	0.958854	-0.043076	0.637244	0.81739
REACTOME_RNA_POL_III_CHAIN_ELONGATION	-0.0135391	0.856	0.943889	0.00378983	0.0111029	0.881699	0.968883	-0.0434703	0.560133	0.772242
BIOCARTA_SPRY_PATHWAY	-0.0122262	0.857562	0.94421	0.00214543	0.00675197	0.921045	0.981731	-0.0154359	0.820738	0.916324
REACTOME_POST_TRANSLATIONAL_MODIFICATION_SYNTHESIS_OF_GPI_ANCHORED_PROTEINS	-0.0101095	0.858507	0.94421	0.00136449	-0.0222667	0.694572	0.876382	-0.0197786	0.727253	0.873937
REACTOME_SIGNALING_BY_FGFR	-0.00492843	0.864614	0.947664	0.00101629	0.00991632	0.73155	0.895519	-0.0370376	0.200072	0.453054
PID_THROMBIN_PAR1_PATHWAY	-0.00752867	0.867713	0.949306	0.00091449	0.0183774	0.684315	0.869338	0.0123631	0.784452	0.90111
REACTOME_VEGF_LIGAND_RECEPTOR_INTERACTIONS	-0.0151426	0.86834	0.949306	0.00645257	-0.0173364	0.849479	0.956506	-0.0108456	0.905491	0.960541
KEGG_MTOR_SIGNALING_PATHWAY	-0.00653756	0.871924	0.949712	0.00113883	0.00739912	0.855221	0.958854	-0.0131415	0.745887	0.887722
BIOCARTA_BCELLSURVIVAL_PATHWAY	-0.0117221	0.871103	0.949712	0.00359805	-0.00132571	0.985359	0.998251	-0.0777456	0.281859	0.529085
REACTOME_SIGNALING_BY_THE_B_CELL_RECEPTOR_BCR	-0.00427336	0.876366	0.950837	0.000932398	0.00479955	0.861895	0.959078	-0.00860946	0.753948	0.890328
REACTOME_FRS2_MEDIATED_CASCADE	-0.00749792	0.876436	0.950837	0.00201921	-0.00809844	0.866629	0.960693	-0.0437737	0.364006	0.61056
PID_P38_MKK3_6PATHWAY	-0.00875091	0.87736	0.951032	0.001591	-0.00777635	0.890928	0.972098	-0.00710764	0.900256	0.958173
BIOCARTA_BAD_PATHWAY	-0.00825669	0.888734	0.958483	0.00174214	0.000414212	0.9944	0.998251	-0.0369916	0.530786	0.752783
KEGG_AMINOACYL_TRNA_BIOSYNTHESIS	-0.00620995	0.890723	0.959818	0.00185548	-0.00399105	0.92964	0.984325	0.0270981	0.548827	0.764759
KEGG_SPHINGOLIPID_METABOLISM	-0.00621496	0.893307	0.960173	0.00173749	0.00147389	0.974626	0.995495	-0.0271121	0.558489	0.772242
ST_GA12_PATHWAY	-0.00799092	0.894541	0.960692	0.00168586	0.01205	0.841562	0.952174	-0.0340243	0.572466	0.782309
BIOCARTA_PITX2_PATHWAY	-0.00980728	0.89542	0.960828	0.00264411	-0.0144947	0.845959	0.954224	-0.0392111	0.599196	0.792419
REACTOME_SMAD2_SMAD3_SMAD4_HETEROTRIMER_REGULATES_TRANSCRIPTION	-0.00768173	0.898599	0.963431	0.00497709	-0.00488457	0.935419	0.986268	-0.067224	0.264779	0.51778
BIOCARTA_NTHI_PATHWAY	-0.00739832	0.900237	0.96357	0.00110677	-0.0176117	0.765381	0.913311	0.0125829	0.831162	0.921506
KEGG_ENDOCYTOSIS	-0.00254059	0.909341	0.965237	0.000229452	-0.00197526	0.929455	0.984325	-0.018586	0.404834	0.649261
BIOCARTA_SHH_PATHWAY	-0.00888453	0.90521	0.965237	0.00176057	0.00177761	0.980992	0.998086	-0.0336849	0.651639	0.821814
PID_AMB2_NEUTROPHILS_PATHWAY	-0.00529201	0.909077	0.965237	0.00104228	-0.00299981	0.948384	0.986268	0.0226909	0.624362	0.809829
PID_TGFBR_PATHWAY	-0.00463081	0.908206	0.965237	0.00198103	0.0119861	0.765368	0.913311	-0.0359884	0.370216	0.617845
BIOCARTA_ACH_PATHWAY	-0.00751868	0.917111	0.969338	0.00278335	0.0320776	0.65703	0.855231	-0.0163033	0.821458	0.916324
PID_MYC_REPRESS_PATHWAY	-0.00370031	0.919278	0.969338	0.000668699	0.00417428	0.908981	0.976995	0.00236225	0.948416	0.981788
REACTOME_EICOSANOID_LIGAND_BINDING_RECEPTORS	-0.00783833	0.919151	0.969338	0.00222755	0.000323959	0.996653	0.998251	0.0830852	0.281964	0.529085
REACTOME_REGULATION_OF_SIGNALING_BY_CBL	-0.00701167	0.918018	0.969338	0.00145937	0.0118211	0.862234	0.959078	-0.0283843	0.676915	0.840376
KEGG_GLYCOSAMINOGLYCAN_BIOSYNTHESIS_KERATAN_SULFATE	-0.00733301	0.921705	0.969844	0.00483346	-0.0123779	0.868232	0.960693	-0.0704558	0.344997	0.592021
PID_SMAD2_3NUCLEAR_PATHWAY	-0.00303124	0.925543	0.971137	0.00136679	0.00828596	0.798371	0.932844	-0.0501128	0.122353	0.333333
PID_LPA4_PATHWAY	-0.0066879	0.928573	0.973296	0.00175614	0.0173225	0.816399	0.941659	0.0013693	0.985357	0.991781
BIOCARTA_CARM_ER_PATHWAY	-0.00424656	0.93179	0.974491	0.00122679	0.00411649	0.933875	0.986268	-0.0413955	0.40408	0.649105
PID_ERB_GENOMIC_PATHWAY	-0.00642831	0.938561	0.979968	0.00209452	-0.000725082	0.993063	0.998251	0.0112875	0.892341	0.955648
KEGG_NON_HOMOLOGOUS_END_JOINING	-0.00556717	0.944612	0.982319	0.00553142	0.00242771	0.975831	0.995495	0.0531445	0.507199	0.740754
REACTOME_PROLONGED_ERK_ACTIVATION_EVENTS	-0.0046631	0.945425	0.982319	0.00315601	0.00833265	0.902644	0.974307	-0.0131052	0.847443	0.929054
SIG_INSULIN_RECEPTOR_PATHWAY_IN_CARDIAC_MYOCYTES	-0.00272363	0.948038	0.982638	0.00121835	0.0162584	0.697254	0.876382	-0.027877	0.504748	0.738867
REACTOME_SIGNALING_BY_EGFR_IN_CANCER	-0.00194276	0.948008	0.982638	0.000929864	0.0181835	0.541643	0.77865	-0.0226945	0.446216	0.685452
REACTOME_METABOLISM_OF_PORPHYRINS	-0.00535052	0.946764	0.982638	0.00244022	-0.0178142	0.824074	0.943712	-0.0462133	0.564136	0.775079
REACTOME_SIGNALING_BY_FGFR_IN_DISEASE	-0.0016423	0.951698	0.985596	0.0010502	0.0128816	0.6347	0.842312	-0.0293995	0.278204	0.528994
KEGG_VALINE_LEUCINE_AND_ISOLEUCINE_BIOSYNTHESIS	-0.0047636	0.956386	0.988074	0.00439181	0.00941841	0.913893	0.979007	-0.00157662	0.985559	0.991781
PID_FRA_PATHWAY	-0.00252943	0.957593	0.988074	0.00115566	-0.00885563	0.852315	0.958854	0.0130649	0.783583	0.90111
PID_WNT_SIGNALING_PATHWAY	-0.0028305	0.958694	0.988074	0.00314958	-0.000333287	0.995134	0.998251	-0.0967909	0.0765515	0.258469
PID_BETA_CATENIN_DEG_PATHWAY	-0.00345936	0.960636	0.988481	0.0020204	-0.00149674	0.982963	0.998251	-0.0158693	0.820883	0.916324
KEGG_ECM_RECEPTOR_INTERACTION	-0.00125304	0.968618	0.98873	0.00195483	-0.011045	0.728757	0.893811	0.0590945	0.0635418	0.232602
BIOCARTA_STATHMIN_PATHWAY	-0.00320631	0.962459	0.98873	0.00172078	0.000967487	0.988668	0.998251	0.0226938	0.739027	0.884416
SA_PROGRAMMED_CELL_DEATH	-0.00310191	0.970331	0.98873	0.00236224	-0.00613766	0.941334	0.986268	0.00354458	0.966099	0.988685
PID_HDAC_CLASSII_PATHWAY	-0.00225664	0.965351	0.98873	0.00129787	0.00688867	0.894507	0.972098	-0.048831	0.347232	0.592665
PID_INTEGRIN_CS_PATHWAY	-0.00222193	0.968745	0.98873	0.00333077	-0.0121107	0.830887	0.944791	0.083719	0.139856	0.360964
PID_ERBB1_DOWNSTREAM_PATHWAY	-0.00112383	0.969444	0.98873	0.00118483	0.00755891	0.796683	0.932844	-0.0361616	0.220077	0.480477
PID_PI3K_PLC_TRK_PATHWAY	-0.00234002	0.961835	0.98873	0.00194094	0.0163644	0.737903	0.899848	0.00271666	0.955699	0.983811
REACTOME_RECYCLING_PATHWAY_OF_L1	-0.0021963	0.970936	0.98873	0.00235161	0.000936365	0.987607	0.998251	-0.0324446	0.590427	0.791889
REACTOME_THE_NLRP3_INFLAMMASOME	-0.00400677	0.96331	0.98873	0.00490282	-0.00994196	0.909126	0.976995	0.0761958	0.381693	0.625526
BIOCARTA_GLEEVEC_PATHWAY	-0.00200972	0.973404	0.989666	0.0024905	0.0345548	0.566493	0.802637	-0.0159808	0.79093	0.902472
BIOCARTA_TOB1_PATHWAY	-0.0021939	0.972922	0.989666	0.00186035	-0.0190383	0.76833	0.914269	0.0377546	0.559126	0.772242
BIOCARTA_ACTINY_PATHWAY	-0.00177674	0.979192	0.993969	0.00450497	-0.0124819	0.854615	0.958854	0.0152632	0.827614	0.919171
REACTOME_CD28_CO_STIMULATION	-0.00130895	0.980224	0.994227	0.0018906	0.0148612	0.778376	0.922004	-0.0345618	0.512777	0.741259
REACTOME_ACTIVATION_OF_THE_MRNA_UPON_BINDING_OF_THE_CAP_BINDING_COMPLEX_AND_EIFS_AND_SUBSEQUENT_BINDING_TO_43S	-0.00108878	0.981739	0.994974	0.00190639	0.0131309	0.785389	0.926803	0.00347991	0.942471	0.978562
ST_G_ALPHA_S_PATHWAY	-0.00155427	0.982835	0.995296	0.00171675	-0.00897346	0.901149	0.974307	0.00348755	0.961497	0.98784
KEGG_PROTEIN_EXPORT	-0.00120365	0.984419	0.995703	0.00340259	-0.000831009	0.989242	0.998251	0.000663855	0.991406	0.994526
REACTOME_POST_NMDA_RECEPTOR_ACTIVATION_EVENTS	-0.000948992	0.985661	0.995791	0.00100278	0.0169655	0.747993	0.905149	0.0169369	0.748403	0.887722
KEGG_MAPK_SIGNALING_PATHWAY	-0.000120864	0.99472	0.998277	0.000397864	0.0112469	0.538027	0.77606	-0.0144011	0.430403	0.670041
KEGG_GAP_JUNCTION	-0.000262783	0.993262	0.998277	0.000874043	0.0170637	0.583439	0.81848	-0.0355144	0.253741	0.511898
REACTOME_VITAMIN_B5_PANTOTHENATE_METABOLISM	-0.000478586	0.995616	0.998277	0.00357203	-0.00199953	0.981685	0.998086	-0.0579561	0.50581	0.739574
REACTOME_TRANSLOCATION_OF_ZAP_70_TO_IMMUNOLOGICAL_SYNAPSE	-0.000629866	0.993492	0.998277	0.00438473	-0.00518334	0.946484	0.986268	0.100347	0.19379	0.445193
REACTOME_MRNA_3_END_PROCESSING	-0.000149929	0.99785	0.998277	0.00513269	0.0262328	0.643653	0.847156	-0.0493789	0.374919	0.621615
REACTOME_SEMA3A_PLEXIN_REPULSION_SIGNALING_BY_INHIBITING_INTEGRIN_ADHESION	-0.000367377	0.996342	0.998277	0.00410878	-0.000174418	0.998263	0.998263	-0.0117926	0.883003	0.950067

## Sheet: 3L (PC1) Positive Correlations
	realstat	realp	realpadj	SubtreeVar	nomarinestat	nomarinep	nomarinepadj	nobnmrstat	nobnmrp	nobnmrpadj
REACTOME_OLFACTORY_SIGNALING_PATHWAY	0.238664	6.21937e-47	7.94835e-44	0.00623523	0.227767	6.70355e-43	8.56714e-40	0.242574	2.0148e-48	1.28443e-45
KEGG_OLFACTORY_TRANSDUCTION	0.216506	1.44773e-45	9.25103e-43	0.0055908	0.205867	2.30275e-41	1.47146e-38	0.225573	2.61816e-49	3.33815e-46
REACTOME_SIGNALING_BY_GPCR	0.060634	4.56868e-09	8.34111e-07	0.000834674	0.0603227	5.48437e-09	1.00129e-06	0.0728374	1.90121e-12	3.03006e-10
REACTOME_BIOLOGICAL_OXIDATIONS	0.149602	6.8578e-09	1.09553e-06	0.00182651	0.143397	2.79249e-08	2.74523e-06	0.154792	2.03107e-09	2.15802e-07
REACTOME_GPCR_DOWNSTREAM_SIGNALING	0.0620395	1.35606e-08	1.57549e-06	0.000926937	0.0609269	2.45046e-08	2.60974e-06	0.0781666	8.38908e-13	1.52801e-10
KEGG_VALINE_LEUCINE_AND_ISOLEUCINE_DEGRADATION	0.219445	4.94166e-07	3.32392e-05	0.00451645	0.199034	5.0947e-06	0.000232537	0.202238	3.58212e-06	0.000253734
KEGG_FATTY_ACID_METABOLISM	0.214953	1.48697e-06	8.26236e-05	0.00498731	0.20434	4.75442e-06	0.000225043	0.201619	6.34912e-06	0.000348878
KEGG_DRUG_METABOLISM_CYTOCHROME_P450	0.17093	4.89102e-06	0.00022324	0.00300866	0.161713	1.53926e-05	0.000614741	0.165884	9.22946e-06	0.000435836
KEGG_METABOLISM_OF_XENOBIOTICS_BY_CYTOCHROME_P450	0.169043	1.05619e-05	0.000421814	0.00268528	0.156789	4.38899e-05	0.00133753	0.15872	3.52951e-05	0.00127011
KEGG_PROPANOATE_METABOLISM	0.223336	1.71481e-05	0.000644567	0.00453157	0.221688	1.97786e-05	0.000743444	0.238654	4.34901e-06	0.000264047
REACTOME_PHASE_II_CONJUGATION	0.153294	3.11107e-05	0.00107458	0.00226772	0.141842	0.000116206	0.002856	0.164811	7.53139e-06	0.000369328
REACTOME_PHASE1_FUNCTIONALIZATION_OF_COMPOUNDS	0.146402	4.07469e-05	0.00136828	0.00240671	0.144395	5.18875e-05	0.00150927	0.144328	5.23073e-05	0.00171005
KEGG_GLYCOLYSIS_GLUCONEOGENESIS	0.150756	6.42567e-05	0.00182489	0.00174411	0.156552	3.32081e-05	0.00114702	0.1562	3.45897e-05	0.00127011
REACTOME_GLUCOSE_METABOLISM	0.150536	7.58795e-05	0.00202029	0.0018989	0.156265	3.99729e-05	0.00129018	0.148743	9.23276e-05	0.00245245
REACTOME_NEURONAL_SYSTEM	0.0658449	0.000273835	0.00583268	0.000660164	0.0780823	1.59527e-05	0.000617805	0.0494756	0.00625352	0.0531549
REACTOME_BILE_ACID_AND_BILE_SALT_METABOLISM	0.195594	0.000440318	0.00879261	0.0036793	0.179353	0.00126933	0.0188628	0.249987	7.05381e-06	0.000359744
REACTOME_METABOLISM_OF_LIPIDS_AND_LIPOPROTEINS	0.047919	0.000522337	0.01027	0.000394894	0.0414504	0.00269388	0.0340869	0.0548789	7.10474e-05	0.00210664
REACTOME_METABOLISM_OF_NUCLEOTIDES	0.122282	0.000554669	0.0105654	0.00220531	0.115603	0.00109755	0.0173169	0.146357	3.5862e-05	0.00127011
REACTOME_NEUROTRANSMITTER_RELEASE_CYCLE	0.170867	0.000690995	0.0120852	0.00325403	0.163796	0.00114308	0.0174721	0.116354	0.0208553	0.112196
REACTOME_BRANCHED_CHAIN_AMINO_ACID_CATABOLISM	0.231748	0.000945086	0.0152889	0.00761411	0.208212	0.0029723	0.0358345	0.179461	0.0104554	0.0744726
KEGG_BETA_ALANINE_METABOLISM	0.203372	0.000967667	0.0154225	0.00387697	0.206074	0.000827032	0.0140926	0.1976	0.00134547	0.0186465
REACTOME_CYTOSOLIC_SULFONATION_OF_SMALL_MOLECULES	0.254597	0.000977481	0.0154225	0.0051815	0.247207	0.00136844	0.0198735	0.302976	8.73043e-05	0.00241985
REACTOME_CLASS_C_3_METABOTROPIC_GLUTAMATE_PHEROMONE_RECEPTORS	0.252848	0.00105935	0.0161172	0.0043065	0.245237	0.00149467	0.0214628	0.25853	0.000814394	0.0135753
REACTOME_ACTIVATED_AMPK_STIMULATES_FATTY_ACID_OXIDATION_IN_MUSCLE	0.220827	0.00118817	0.0176328	0.00288445	0.218918	0.00131046	0.0192502	0.210153	0.00203544	0.0242541
REACTOME_MITOCHONDRIAL_FATTY_ACID_BETA_OXIDATION	0.249926	0.00121033	0.0176328	0.0115444	0.22615	0.00340555	0.0384375	0.293045	0.00014776	0.00369401
REACTOME_FATTY_ACID_TRIACYLGLYCEROL_AND_KETONE_BODY_METABOLISM	0.0732454	0.00121415	0.0176328	0.000539595	0.0663907	0.00336018	0.038342	0.0608122	0.00722523	0.0579382
REACTOME_METABOLISM_OF_AMINO_ACIDS_AND_DERIVATIVES	0.0676988	0.00128581	0.0180579	0.00100929	0.062545	0.00301208	0.0358345	0.0532649	0.0113172	0.0775774
REACTOME_PURINE_METABOLISM	0.164758	0.00127272	0.0180579	0.00312253	0.154607	0.00249835	0.0325805	0.220182	1.66268e-05	0.000731007
KEGG_STARCH_AND_SUCROSE_METABOLISM	0.142881	0.00137801	0.0191423	0.00268367	0.129072	0.00385203	0.0417195	0.162744	0.00026846	0.00570478
REACTOME_CYTOCHROME_P450_ARRANGED_BY_SUBSTRATE_TYPE	0.134075	0.00149966	0.0195568	0.00232632	0.123877	0.0033542	0.038342	0.136394	0.00123946	0.017559
REACTOME_TRANSPORT_OF_INORGANIC_CATIONS_ANIONS_AND_AMINO_ACIDS_OLIGOPEPTIDES	0.0939901	0.00190178	0.0235968	0.00129257	0.085688	0.00464222	0.0444095	0.0925474	0.0022321	0.0257583
KEGG_PPAR_SIGNALING_PATHWAY	0.107497	0.00207036	0.0251993	0.0016095	0.0906937	0.0093629	0.0691664	0.138388	7.33916e-05	0.00212669
KEGG_BUTANOATE_METABOLISM	0.152381	0.00213084	0.0256907	0.00321694	0.137073	0.00573072	0.0488931	0.155749	0.00169388	0.0221402
REACTOME_GLUTAMATE_NEUROTRANSMITTER_RELEASE_CYCLE	0.233952	0.00244897	0.0284191	0.00606786	0.215564	0.00524702	0.0482424	0.185297	0.0164164	0.0991988
REACTOME_PEROXISOMAL_LIPID_METABOLISM	0.190685	0.00317479	0.0335321	0.00319164	0.176441	0.00633528	0.05157	0.225847	0.000475303	0.00865731
REACTOME_SYNTHESIS_OF_BILE_ACIDS_AND_BILE_SALTS_VIA_7ALPHA_HYDROXYCHOLESTEROL	0.219239	0.00329782	0.0343247	0.00432292	0.195787	0.00868569	0.0649141	0.280347	0.000171571	0.00420678
REACTOME_SLC_MEDIATED_TRANSMEMBRANE_TRANSPORT	0.055453	0.00343543	0.0349386	0.000696999	0.047643	0.0119466	0.0803565	0.0573036	0.00249938	0.027059
KEGG_PEROXISOME	0.0972203	0.00347637	0.0349827	0.00169581	0.0891051	0.00740171	0.058754	0.118283	0.000377701	0.00765336
REACTOME_GLUCONEOGENESIS	0.15415	0.00350887	0.0350338	0.00319403	0.157594	0.00284073	0.0355927	0.181212	0.000599745	0.010475
KEGG_PYRUVATE_METABOLISM	0.136185	0.0037176	0.0362678	0.00182669	0.128612	0.00614683	0.0510661	0.154775	0.000976554	0.0150013
REACTOME_RECYCLING_OF_BILE_ACIDS_AND_SALTS	0.252749	0.00371102	0.0362678	0.00676729	0.232096	0.00770747	0.0603974	0.323084	0.00020789	0.00481928
KEGG_RETINOL_METABOLISM	0.114803	0.00390616	0.0372543	0.00212551	0.0928302	0.0196302	0.113006	0.0959075	0.0159224	0.0980274
REACTOME_CYTOSOLIC_TRNA_AMINOACYLATION	0.168113	0.00439117	0.0409629	0.00302037	0.168482	0.0043056	0.0430762	0.180354	0.00224289	0.0257583
BIOCARTA_DREAM_PATHWAY	0.225777	0.00483938	0.0441766	0.00937673	0.222892	0.00541023	0.0487814	0.0798606	0.318957	0.566393
REACTOME_GLYCOLYSIS	0.160741	0.0054412	0.0473051	0.00442765	0.17239	0.0028719	0.0356339	0.148138	0.0104152	0.0744726
KEGG_ALANINE_ASPARTATE_AND_GLUTAMATE_METABOLISM	0.14205	0.00624965	0.0518639	0.00314512	0.137653	0.00805531	0.0609153	0.140084	0.00700619	0.0567056
KEGG_ARGININE_AND_PROLINE_METABOLISM	0.10848	0.00639674	0.0527421	0.00163328	0.114406	0.00403196	0.0429296	0.129331	0.00115073	0.0167856
BIOCARTA_ETC_PATHWAY	0.235186	0.00693187	0.0560428	0.00758743	0.215766	0.0132441	0.0854844	0.222025	0.0108033	0.0752692
REACTOME_TRANSMEMBRANE_TRANSPORT_OF_SMALL_MOLECULES	0.0395936	0.00761474	0.0589796	0.000373864	0.0373213	0.0118872	0.0803565	0.0481457	0.00117439	0.0168241
REACTOME_TRANSMISSION_ACROSS_CHEMICAL_SYNAPSES	0.0590769	0.00792127	0.0599017	0.000714151	0.0730342	0.00102807	0.0166313	0.036624	0.0997297	0.297092
KEGG_CITRATE_CYCLE_TCA_CYCLE	0.138565	0.00868781	0.0630854	0.00226985	0.143654	0.00651883	0.0527282	0.160074	0.00243408	0.0269865
REACTOME_ENDOSOMAL_SORTING_COMPLEX_REQUIRED_FOR_TRANSPORT_ESCRT	0.161735	0.00868563	0.0630854	0.00260976	0.185248	0.0026498	0.0338645	0.132302	0.0318226	0.147541
REACTOME_TRIGLYCERIDE_BIOSYNTHESIS	0.122166	0.00925405	0.0657319	0.000997208	0.110359	0.0187236	0.108275	0.114577	0.0146531	0.0924888
REACTOME_TRAFFICKING_OF_GLUR2_CONTAINING_AMPA_RECEPTORS	0.206343	0.0100234	0.0692426	0.00551235	0.210834	0.008512	0.0639902	0.176389	0.0277209	0.135418
REACTOME_GLUTATHIONE_CONJUGATION	0.154829	0.010216	0.0698185	0.00249925	0.150056	0.0128013	0.0834695	0.150461	0.0125613	0.0828277
REACTOME_GABA_SYNTHESIS_RELEASE_REUPTAKE_AND_DEGRADATION	0.183978	0.0108771	0.0727795	0.00600322	0.181032	0.0122158	0.0808902	0.113993	0.114591	0.321106
KEGG_ALZHEIMERS_DISEASE	0.0605113	0.0112403	0.0748182	0.00180354	0.0563259	0.0182863	0.107201	0.0675571	0.00465051	0.0421127
REACTOME_FORMATION_OF_ATP_BY_CHEMIOSMOTIC_COUPLING	0.219816	0.0116148	0.0762196	0.0104504	0.206175	0.0179317	0.106096	0.15711	0.0712729	0.246268
KEGG_TIGHT_JUNCTION	0.0654919	0.0118399	0.0764212	0.000564277	0.0744431	0.00422494	0.0430762	0.0704094	0.0068132	0.0556848
REACTOME_PURINE_SALVAGE	0.200522	0.0123364	0.0784373	0.00598135	0.194787	0.0150652	0.0948441	0.309696	0.000111185	0.00283774
REACTOME_SYNTHESIS_OF_BILE_ACIDS_AND_BILE_SALTS	0.165544	0.0125388	0.0793294	0.00358661	0.146769	0.0268669	0.141884	0.21155	0.00142066	0.0194427
REACTOME_DARPP_32_EVENTS	0.169819	0.01267	0.079374	0.0064978	0.175176	0.010124	0.0718807	0.0835787	0.219852	0.480477
REACTOME_STRIATED_MUSCLE_CONTRACTION	0.138126	0.0130646	0.0810516	0.00385639	0.157527	0.00464578	0.0444095	0.14453	0.00940206	0.0701031
BIOCARTA_NOS1_PATHWAY	0.168723	0.0160756	0.0960029	0.00586969	0.204642	0.00350428	0.0387979	0.0944402	0.177855	0.418671
KEGG_LINOLEIC_ACID_METABOLISM	0.137817	0.0171599	0.100138	0.00286257	0.115368	0.046038	0.20864	0.18222	0.00162649	0.0218292
BIOCARTA_CK1_PATHWAY	0.176874	0.0177548	0.103139	0.00787647	0.198108	0.00792392	0.0606394	0.16177	0.0301401	0.14339
REACTOME_AMINE_COMPOUND_SLC_TRANSPORTERS	0.131279	0.0183257	0.105974	0.00301262	0.119803	0.0313376	0.160841	0.129475	0.0199891	0.110979
REACTOME_EXTRACELLULAR_MATRIX_ORGANIZATION	0.0748235	0.0188121	0.107811	0.00122386	0.0762831	0.016618	0.10115	0.112707	0.000402176	0.00765336
NABA_COLLAGENS	0.102045	0.0193687	0.109296	0.0027402	0.091857	0.0353005	0.174246	0.154465	0.000400816	0.00765336
BIOCARTA_CHREBP2_PATHWAY	0.109562	0.0195942	0.109351	0.00155232	0.0998182	0.0334665	0.166421	0.0302476	0.519336	0.748196
REACTOME_MEMBRANE_TRAFFICKING	0.0632569	0.0201714	0.111116	0.000656488	0.0685817	0.0117793	0.0800742	0.0460701	0.0906582	0.283307
KEGG_TYPE_II_DIABETES_MELLITUS	0.0997323	0.0208305	0.113282	0.00124025	0.111826	0.00956192	0.0698293	0.0647152	0.133716	0.355396
REACTOME_AMINO_ACID_AND_OLIGOPEPTIDE_SLC_TRANSPORTERS	0.0941813	0.0227991	0.122425	0.00235569	0.0810837	0.0499781	0.220248	0.0974407	0.0184942	0.105002
REACTOME_TRANSPORT_OF_VITAMINS_NUCLEOSIDES_AND_RELATED_MOLECULES	0.114427	0.0276176	0.141578	0.00144639	0.101416	0.0509131	0.222832	0.128844	0.0131315	0.0841342
REACTOME_ETHANOL_OXIDATION	0.201175	0.0276454	0.141578	0.00403434	0.21197	0.0203164	0.115806	0.141581	0.121166	0.330807
REACTOME_MUSCLE_CONTRACTION	0.100347	0.028309	0.142999	0.00296078	0.106358	0.020108	0.115238	0.124182	0.00665047	0.0554206
REACTOME_VOLTAGE_GATED_POTASSIUM_CHANNELS	0.0968563	0.028219	0.142999	0.00202677	0.105624	0.0167183	0.10115	0.0719236	0.103231	0.30419
REACTOME_SYNTHESIS_OF_PA	0.119789	0.0313576	0.155329	0.00129564	0.093934	0.0914278	0.317513	0.147573	0.00800746	0.0615031
REACTOME_POTASSIUM_CHANNELS	0.0648925	0.0311349	0.155329	0.00114005	0.0733782	0.0148024	0.0936507	0.0382867	0.203497	0.455191
REACTOME_CITRIC_ACID_CYCLE_TCA_CYCLE	0.139158	0.0358465	0.169832	0.00409219	0.144277	0.0295653	0.153002	0.139302	0.0356557	0.16064
KEGG_ARACHIDONIC_ACID_METABOLISM	0.0796438	0.0396481	0.183992	0.00136742	0.0707509	0.0675997	0.265206	0.121058	0.00176463	0.0222763
REACTOME_CELL_CELL_COMMUNICATION	0.0551378	0.0394294	0.183992	0.000689796	0.0617032	0.0211715	0.119722	0.0691627	0.00977873	0.0718621
REACTOME_ERKS_ARE_INACTIVATED	0.179147	0.039712	0.183992	0.00551127	0.205205	0.0184779	0.10734	0.123584	0.15595	0.383115
REACTOME_PYRUVATE_METABOLISM_AND_CITRIC_ACID_TCA_CYCLE	0.0930581	0.0419833	0.192311	0.00215261	0.0936947	0.0406	0.188679	0.0737269	0.107132	0.310937
KEGG_LEUKOCYTE_TRANSENDOTHELIAL_MIGRATION	0.0558284	0.0430167	0.194948	0.00109904	0.0588693	0.0328629	0.16535	0.0906742	0.00101427	0.0153308
REACTOME_XENOBIOTICS	0.167901	0.0440921	0.19634	0.00612218	0.132363	0.112491	0.355851	0.222389	0.00766353	0.0599448
REACTOME_COLLAGEN_FORMATION	0.0778367	0.0462828	0.201875	0.002141	0.0772509	0.0479512	0.213525	0.113972	0.00352352	0.0348255
REACTOME_NA_CL_DEPENDENT_NEUROTRANSMITTER_TRANSPORTERS	0.139909	0.0459223	0.201875	0.00345747	0.127309	0.0693191	0.269717	0.120205	0.0863498	0.27732
KEGG_ASCORBATE_AND_ALDARATE_METABOLISM	0.138064	0.0488631	0.210259	0.00479971	0.122209	0.081233	0.297466	0.134728	0.0545823	0.210249
REACTOME_AXON_GUIDANCE	0.0380026	0.0490564	0.210383	0.000388152	0.043233	0.0251593	0.135669	0.0406494	0.0352788	0.160073
KEGG_SULFUR_METABOLISM	0.15638	0.0509958	0.217168	0.00314123	0.149533	0.0620324	0.256561	0.182906	0.0224579	0.118321
REACTOME_TCA_CYCLE_AND_RESPIRATORY_ELECTRON_TRANSPORT	0.0533238	0.053265	0.221015	0.00329558	0.0408032	0.139157	0.403271	0.0343844	0.212661	0.470711
REACTOME_NCAM1_INTERACTIONS	0.0884206	0.0563722	0.231652	0.00113521	0.0827477	0.0741445	0.278779	0.105205	0.0231859	0.121156
BIOCARTA_PROTEASOME_PATHWAY	0.110101	0.0569148	0.233132	0.00225796	0.106569	0.0653442	0.26261	0.0168668	0.770534	0.895562
REACTOME_REGULATION_OF_GENE_EXPRESSION_IN_BETA_CELLS	0.125761	0.0578771	0.234815	0.00423696	0.137002	0.0388147	0.182372	0.0973694	0.141983	0.361978
REACTOME_NCAM_SIGNALING_FOR_NEURITE_OUT_GROWTH	0.0680703	0.0602568	0.241396	0.000668712	0.0719101	0.0471567	0.212205	0.0637876	0.078291	0.260647
REACTOME_INSULIN_SYNTHESIS_AND_PROCESSING	0.126966	0.0623445	0.245158	0.00211246	0.141335	0.0380075	0.180506	0.0722931	0.288576	0.533307
REACTOME_GAP_JUNCTION_TRAFFICKING	0.107805	0.0622847	0.245158	0.00298395	0.103398	0.0737683	0.278779	0.120277	0.0375301	0.165574
KEGG_CYSTEINE_AND_METHIONINE_METABOLISM	0.0926054	0.0659166	0.255375	0.00140241	0.0941948	0.0614075	0.254801	0.0516291	0.305237	0.548116
BIOCARTA_LEPTIN_PATHWAY	0.158223	0.0692926	0.263559	0.00325816	0.141443	0.104405	0.343455	0.138904	0.110776	0.31317
PID_ECADHERIN_KERATINOCYTE_PATHWAY	0.120511	0.0691486	0.263559	0.00139249	0.141895	0.0323595	0.163734	0.130823	0.0484987	0.196304
REACTOME_SYNTHESIS_OF_BILE_ACIDS_AND_BILE_SALTS_VIA_24_HYDROXYCHOLESTEROL	0.163986	0.0726272	0.271396	0.00330412	0.165731	0.0696354	0.269717	0.198186	0.0300402	0.14339
REACTOME_GLYCOGEN_BREAKDOWN_GLYCOGENOLYSIS	0.142891	0.0745574	0.274595	0.00344754	0.135627	0.0905462	0.317513	0.127861	0.110575	0.31317
KEGG_SPLICEOSOME	0.0527917	0.0764005	0.277386	0.0029015	0.0626603	0.0364184	0.176968	-0.00588757	0.843346	0.927244
KEGG_TRYPTOPHAN_METABOLISM	0.0807378	0.0776582	0.278784	0.00263835	0.069703	0.127688	0.384872	0.106212	0.0202797	0.110979
KEGG_PRIMARY_BILE_ACID_BIOSYNTHESIS	0.126148	0.0807854	0.283092	0.00363679	0.108371	0.133596	0.396138	0.177367	0.0140841	0.0897863
KEGG_PHENYLALANINE_METABOLISM	0.122418	0.0807145	0.283092	0.00226855	0.125802	0.0726814	0.277274	0.127766	0.0683257	0.241987
BIOCARTA_CARM1_PATHWAY	0.145596	0.0808519	0.283092	0.00419822	0.150388	0.0713535	0.273843	0.121496	0.145173	0.365801
KEGG_ALPHA_LINOLENIC_ACID_METABOLISM	0.118164	0.0828072	0.286299	0.00446921	0.0861472	0.206005	0.492315	0.15425	0.0235518	0.122067
KEGG_GLYOXYLATE_AND_DICARBOXYLATE_METABOLISM	0.125283	0.0828877	0.286299	0.00476853	0.134226	0.0631748	0.258304	0.146347	0.0427923	0.181263
REACTOME_AMINE_LIGAND_BINDING_RECEPTORS	0.0819607	0.0848878	0.288528	0.00175049	0.0955282	0.0446201	0.204389	0.0693488	0.144877	0.365779
KEGG_LONG_TERM_POTENTIATION	0.0633517	0.0851897	0.288786	0.00112432	0.0774631	0.0353128	0.174246	0.0643888	0.0802031	0.264235
KEGG_STEROID_HORMONE_BIOSYNTHESIS	0.0743449	0.0884541	0.295927	0.00488898	0.0527022	0.227176	0.512951	0.0910657	0.0369098	0.163739
REACTOME_BOTULINUM_NEUROTOXICITY	0.122871	0.0889829	0.29692	0.00213791	0.123973	0.0861557	0.307755	0.156534	0.030255	0.143402
REACTOME_TRANSPORT_OF_GLUCOSE_AND_OTHER_SUGARS_BILE_SALTS_AND_ORGANIC_ACIDS_METAL_IONS_AND_AMINE_COMPOUNDS	0.0520646	0.0906274	0.299281	0.000965592	0.0448305	0.145121	0.408511	0.068234	0.0265828	0.131879
REACTOME_CELL_JUNCTION_ORGANIZATION	0.0552245	0.0947897	0.304475	0.000837511	0.0573923	0.082523	0.298766	0.0868066	0.00863775	0.0651665
PID_SYNDECAN_1_PATHWAY	0.0711166	0.0957025	0.30577	0.00221796	0.0615416	0.149377	0.414107	0.117304	0.00599447	0.0513063
KEGG_AMYOTROPHIC_LATERAL_SCLEROSIS_ALS	0.0669701	0.0986415	0.311269	0.000810164	0.0638565	0.115328	0.359487	0.0718008	0.0766283	0.258469
REACTOME_SYNTHESIS_AND_INTERCONVERSION_OF_NUCLEOTIDE_DI_AND_TRIPHOSPHATES	0.11938	0.0984409	0.311269	0.00291075	0.11431	0.113586	0.357653	0.067076	0.353167	0.597991
REACTOME_FATTY_ACYL_COA_BIOSYNTHESIS	0.111261	0.102407	0.319991	0.00203121	0.109258	0.108739	0.34829	0.105755	0.120552	0.329837
REACTOME_LYSOSOME_VESICLE_BIOGENESIS	0.108069	0.103142	0.320637	0.00183747	0.110018	0.0970763	0.32821	0.0792121	0.232239	0.494065
REACTOME_AMINO_ACID_TRANSPORT_ACROSS_THE_PLASMA_MEMBRANE	0.0836382	0.107399	0.329235	0.00265925	0.0655166	0.20725	0.492315	0.0777836	0.134317	0.355787
KEGG_DRUG_METABOLISM_OTHER_ENZYMES	0.0725653	0.108397	0.329837	0.00216901	0.0673649	0.136124	0.398093	0.104895	0.0203027	0.110979
REACTOME_SPRY_REGULATION_OF_FGF_SIGNALING	0.146676	0.108344	0.329837	0.0050371	0.16148	0.0771053	0.283492	0.051348	0.574041	0.783621
REACTOME_ACYL_CHAIN_REMODELLING_OF_PG	0.115636	0.109458	0.331486	0.00250021	0.0914971	0.205334	0.492315	0.164973	0.022398	0.118321
REACTOME_REGULATION_OF_AMPK_ACTIVITY_VIA_LKB1	0.12327	0.110423	0.33283	0.00224406	0.116363	0.13185	0.393702	0.105032	0.173791	0.413681
REACTOME_LIPID_DIGESTION_MOBILIZATION_AND_TRANSPORT	0.0705127	0.114373	0.342315	0.00136334	0.0737685	0.0985882	0.330845	0.095572	0.0323601	0.14895
BIOCARTA_RAC1_PATHWAY	0.0936947	0.120116	0.355482	0.00249332	0.112985	0.0608898	0.254304	0.0680245	0.259131	0.517046
SIG_REGULATION_OF_THE_ACTIN_CYTOSKELETON_BY_RHO_GTPASES	0.0820019	0.120441	0.355482	0.00185226	0.0936216	0.0762333	0.281579	0.0631818	0.231496	0.493574
REACTOME_DOPAMINE_NEUROTRANSMITTER_RELEASE_CYCLE	0.141511	0.121351	0.357342	0.0027479	0.163624	0.0732603	0.277824	0.0632721	0.488533	0.726814
REACTOME_SIGNALING_BY_NODAL	0.10848	0.121696	0.357534	0.00460483	0.135914	0.0524882	0.228558	0.0795268	0.256535	0.515635
REACTOME_PURINE_RIBONUCLEOSIDE_MONOPHOSPHATE_BIOSYNTHESIS	0.133436	0.125536	0.364626	0.00347134	0.119643	0.16957	0.442207	0.126781	0.145521	0.365954
REACTOME_N_GLYCAN_ANTENNAE_ELONGATION_IN_THE_MEDIAL_TRANS_GOLGI	0.104399	0.125384	0.364626	0.00388495	0.126843	0.0625981	0.258066	0.0217056	0.750003	0.887887
KEGG_GALACTOSE_METABOLISM	0.0853013	0.132521	0.377944	0.00204873	0.082655	0.14496	0.408511	0.109684	0.0530876	0.207396
KEGG_GLUTATHIONE_METABOLISM	0.0619023	0.134535	0.377944	0.00115706	0.070607	0.0878436	0.311162	0.0799527	0.0532597	0.207396
BIOCARTA_NUCLEARRS_PATHWAY	0.115913	0.133349	0.377944	0.00279958	0.108544	0.159844	0.43005	0.166118	0.0314639	0.14641
REACTOME_VIF_MEDIATED_DEGRADATION_OF_APOBEC3G	0.067803	0.133595	0.377944	0.00216092	0.0677509	0.138708	0.403021	0.0179109	0.691913	0.847564
REACTOME_TRAFFICKING_OF_AMPA_RECEPTORS	0.0860976	0.136518	0.380033	0.0025251	0.129709	0.0248935	0.135378	0.0637618	0.270188	0.52107
REACTOME_GLUCURONIDATION	0.129597	0.136788	0.380033	0.00694269	0.103413	0.235128	0.522596	0.136564	0.116916	0.326089
KEGG_HYPERTROPHIC_CARDIOMYOPATHY_HCM	0.048185	0.137399	0.380195	0.00108287	0.05889	0.0694357	0.269717	0.0721493	0.0261246	0.130113
REACTOME_REGULATION_OF_ORNITHINE_DECARBOXYLASE_ODC	0.0640057	0.138029	0.380997	0.0017022	0.0639149	0.143029	0.407108	0.0181292	0.674414	0.838088
REACTOME_UNBLOCKING_OF_NMDA_RECEPTOR_GLUTAMATE_BINDING_AND_ACTIVATION	0.110485	0.138643	0.381045	0.00375926	0.121053	0.104694	0.343455	0.112565	0.131366	0.351873
REACTOME_REGULATION_OF_APOPTOSIS	0.059663	0.141215	0.387279	0.00123493	0.0663728	0.105079	0.343455	0.00842734	0.835372	0.924566
KEGG_GLYCOSAMINOGLYCAN_BIOSYNTHESIS_HEPARAN_SULFATE	0.0830228	0.14318	0.388694	0.00207984	0.0853179	0.132446	0.394561	0.0349101	0.538148	0.759004
BIOCARTA_NDKDYNAMIN_PATHWAY	0.120832	0.147385	0.39562	0.0035803	0.134058	0.107962	0.346672	0.145695	0.0806453	0.264902
BIOCARTA_PLCE_PATHWAY	0.132525	0.146845	0.39562	0.00574732	0.140456	0.124151	0.376877	0.0884681	0.332811	0.5789
KEGG_NITROGEN_METABOLISM	0.0889142	0.149119	0.397857	0.00201563	0.0781595	0.204743	0.492315	0.126802	0.0396492	0.170739
BIOCARTA_CFTR_PATHWAY	0.124154	0.154049	0.405926	0.00445977	0.126305	0.14704	0.410526	0.0824689	0.343741	0.591457
KEGG_ETHER_LIPID_METABOLISM	0.0727031	0.155082	0.406416	0.00152007	0.056488	0.269291	0.56051	0.122504	0.0165875	0.099208
KEGG_PROTEASOME	0.0646701	0.157569	0.409294	0.0017438	0.0675453	0.144937	0.408511	0.0276076	0.546287	0.763119
REACTOME_DEADENYLATION_DEPENDENT_MRNA_DECAY	0.0662533	0.158125	0.409905	0.00202127	0.0745215	0.11239	0.355851	0.0221801	0.636566	0.81739
REACTOME_GRB2_SOS_PROVIDES_LINKAGE_TO_MAPK_SIGNALING_FOR_INTERGRINS_	0.108451	0.160202	0.413613	0.00226764	0.119173	0.122772	0.375365	0.132146	0.0870369	0.278824
KEGG_ALDOSTERONE_REGULATED_SODIUM_REABSORPTION	0.0636718	0.16408	0.41776	0.00126146	0.0785446	0.0860696	0.307755	0.0452429	0.322794	0.570025
BIOCARTA_FIBRINOLYSIS_PATHWAY	0.115067	0.167678	0.424342	0.00460214	0.0901144	0.279914	0.567826	0.174226	0.0367037	0.163739
REACTOME_DESTABILIZATION_OF_MRNA_BY_AUF1_HNRNP_D0	0.0595853	0.16736	0.424342	0.00194348	0.0619883	0.155475	0.423861	0.000184615	0.996587	0.997369
REACTOME_OTHER_SEMAPHORIN_INTERACTIONS	0.10285	0.168041	0.424419	0.00257171	0.0938703	0.208331	0.493964	0.0785489	0.292427	0.535624
KEGG_PENTOSE_AND_GLUCURONATE_INTERCONVERSIONS	0.090725	0.171237	0.428264	0.00397049	0.066895	0.313044	0.59623	0.072684	0.273009	0.524829
REACTOME_DEVELOPMENTAL_BIOLOGY	0.0209889	0.171239	0.428264	0.000365561	0.029392	0.0553675	0.236654	0.0102627	0.503499	0.738735
REACTOME_ALPHA_LINOLENIC_ACID_ALA_METABOLISM	0.11889	0.172273	0.43001	0.00604766	0.122094	0.160998	0.431016	0.129021	0.13854	0.359022
BIOCARTA_MCALPAIN_PATHWAY	0.0792356	0.179396	0.443459	0.00255431	0.0784242	0.183893	0.460116	0.0905988	0.132857	0.354379
REACTOME_SIGNALING_BY_WNT	0.0522358	0.181105	0.446819	0.00166564	0.0545541	0.166346	0.43653	-0.013964	0.720709	0.869828
REACTOME_PKA_MEDIATED_PHOSPHORYLATION_OF_CREB	0.0959742	0.184021	0.450535	0.00169263	0.12546	0.0824555	0.298766	0.0690995	0.338833	0.585674
ST_JNK_MAPK_PATHWAY	0.0607825	0.189619	0.458097	0.00129176	0.0598369	0.1966	0.48041	0.0187522	0.685714	0.843525
REACTOME_CDK_MEDIATED_PHOSPHORYLATION_AND_REMOVAL_OF_CDC6	0.0593812	0.18893	0.458097	0.00191547	0.061919	0.176001	0.45205	0.0097918	0.828494	0.919347
KEGG_CIRCADIAN_RHYTHM_MAMMAL	0.104495	0.192224	0.461772	0.00199275	0.107927	0.178027	0.45413	0.0944305	0.238627	0.500524
KEGG_BIOSYNTHESIS_OF_UNSATURATED_FATTY_ACIDS	0.0821572	0.192763	0.461988	0.00255457	0.0666848	0.290438	0.579063	0.0771319	0.221412	0.482566
REACTOME_CREB_PHOSPHORYLATION_THROUGH_THE_ACTIVATION_OF_CAMKII	0.108557	0.193037	0.461988	0.00218742	0.134426	0.106999	0.345315	0.111302	0.182021	0.425049
REACTOME_PYRUVATE_METABOLISM	0.0885104	0.193834	0.462563	0.00321041	0.0796133	0.24252	0.530721	0.0476775	0.483991	0.723434
KEGG_FC_GAMMA_R_MEDIATED_PHAGOCYTOSIS	0.0392618	0.197014	0.464917	0.000664648	0.050979	0.0939116	0.323502	0.0534794	0.0788712	0.261877
REACTOME_ACTIVATION_OF_THE_AP1_FAMILY_OF_TRANSCRIPTION_FACTORS	0.118019	0.196368	0.464917	0.00523611	0.121367	0.183974	0.460116	-0.00256127	0.977631	0.989602
REACTOME_CELL_CELL_JUNCTION_ORGANIZATION	0.0496034	0.20006	0.468808	0.00116309	0.0541061	0.162206	0.431142	0.0739771	0.056004	0.21363
REACTOME_RESPIRATORY_ELECTRON_TRANSPORT_ATP_SYNTHESIS_BY_CHEMIOSMOTIC_COUPLING_AND_HEAT_PRODUCTION_BY_UNCOUPLING_PROTEINS_	0.0428513	0.200703	0.468808	0.00571814	0.0233774	0.485144	0.737234	0.024355	0.467077	0.706434
REACTOME_INTRINSIC_PATHWAY	0.091901	0.20334	0.472488	0.00236437	0.0734199	0.309497	0.595689	0.131454	0.0688226	0.242204
REACTOME_DEGRADATION_OF_THE_EXTRACELLULAR_MATRIX	0.0679145	0.213984	0.483996	0.00149839	0.0733581	0.179502	0.456072	0.108709	0.0466873	0.19138
KEGG_TYROSINE_METABOLISM	0.0549725	0.223904	0.494212	0.00181047	0.048419	0.284069	0.573524	0.0689057	0.127392	0.342668
REACTOME_ER_PHAGOSOME_PATHWAY	0.0489039	0.223355	0.494212	0.00154669	0.0473512	0.242939	0.530729	0.00568063	0.887521	0.953319
KEGG_N_GLYCAN_BIOSYNTHESIS	0.0517171	0.230757	0.503033	0.00223178	0.0536032	0.214194	0.499525	0.0260855	0.545536	0.763119
KEGG_DILATED_CARDIOMYOPATHY	0.0374814	0.231049	0.503033	0.000990351	0.053696	0.0862049	0.307755	0.0622102	0.0468318	0.19138
PID_NCADHERIN_PATHWAY	0.0622912	0.230498	0.503033	0.00167538	0.0719001	0.166346	0.43653	0.0556797	0.283807	0.531356
REACTOME_REGULATION_OF_PYRUVATE_DEHYDROGENASE_PDH_COMPLEX	0.100078	0.230149	0.503033	0.00480379	0.0952512	0.25341	0.541569	0.0444451	0.594091	0.791889
REACTOME_DEADENYLATION_OF_MRNA	0.0842787	0.229203	0.503033	0.00279367	0.0872687	0.213105	0.499525	0.024888	0.72253	0.869828
REACTOME_METABOLISM_OF_POLYAMINES	0.0889597	0.233124	0.504969	0.0028541	0.108794	0.144786	0.408511	0.0783446	0.293684	0.535624
REACTOME_AUTODEGRADATION_OF_THE_E3_UBIQUITIN_LIGASE_COP1	0.0527309	0.237726	0.512333	0.00193119	0.0512537	0.256821	0.544307	0.00116294	0.979226	0.989602
KEGG_MATURITY_ONSET_DIABETES_OF_THE_YOUNG	0.0696199	0.238127	0.512334	0.00383428	0.110666	0.0607661	0.254304	0.0284035	0.630314	0.815634
KEGG_FRUCTOSE_AND_MANNOSE_METABOLISM	0.0592557	0.239307	0.513145	0.00239845	0.0656119	0.192595	0.473532	0.0722197	0.151527	0.376601
REACTOME_GLYCEROPHOSPHOLIPID_BIOSYNTHESIS	0.0376442	0.240057	0.51389	0.000661947	0.0243013	0.448199	0.720519	0.0538196	0.093024	0.285797
KEGG_GLYCINE_SERINE_AND_THREONINE_METABOLISM	0.0606996	0.242629	0.517663	0.00273423	0.054517	0.293983	0.58173	0.0574633	0.268666	0.519015
REACTOME_HDL_MEDIATED_LIPID_TRANSPORT	0.0898697	0.244515	0.519951	0.00326827	0.0898329	0.244708	0.532538	0.120998	0.117145	0.326089
REACTOME_N_GLYCAN_ANTENNAE_ELONGATION	0.0890736	0.248719	0.526263	0.00380347	0.120259	0.119399	0.367557	0.00750543	0.922574	0.968511
KEGG_TASTE_TRANSDUCTION	0.0479543	0.251195	0.530623	0.00173229	0.0493676	0.237497	0.524217	0.0806221	0.053716	0.207758
PID_NETRIN_PATHWAY	0.06049	0.251985	0.530998	0.00234088	0.0818882	0.120957	0.370703	0.00207207	0.968699	0.988685
PID_HNF3B_PATHWAY	0.0498687	0.253147	0.531071	0.000766208	0.0438132	0.315391	0.598093	0.0756886	0.0828479	0.270849
REACTOME_ROLE_OF_DCC_IN_REGULATING_APOPTOSIS	0.103795	0.255852	0.532034	0.00324882	0.110708	0.225539	0.511969	0.029326	0.748185	0.887722
REACTOME_SCF_BETA_TRCP_MEDIATED_DEGRADATION_OF_EMI1	0.0501904	0.255523	0.532034	0.00191491	0.0524688	0.240067	0.527158	0.00169261	0.969413	0.988685
REACTOME_L1CAM_INTERACTIONS	0.0369818	0.260187	0.538928	0.000795411	0.0470085	0.152368	0.420575	0.0210338	0.521919	0.749748
REACTOME_PYRIMIDINE_METABOLISM	0.0665714	0.269444	0.550079	0.00427271	0.0604582	0.315894	0.598093	0.10576	0.0793547	0.262117
BIOCARTA_MEF2D_PATHWAY	0.0790227	0.274028	0.552956	0.00213783	0.0832976	0.248909	0.537912	0.0694138	0.33664	0.58473
REACTOME_RETROGRADE_NEUROTROPHIN_SIGNALLING	0.0997184	0.274997	0.552956	0.00486058	0.104619	0.252097	0.541569	0.0934926	0.306085	0.548116
REACTOME_AMINO_ACID_SYNTHESIS_AND_INTERCONVERSION_TRANSAMINATION	0.0792754	0.272497	0.552956	0.0021543	0.0770981	0.285885	0.574622	0.121781	0.0918561	0.284264
KEGG_CALCIUM_SIGNALING_PATHWAY	0.0241352	0.279365	0.558774	0.000443374	0.0370608	0.0967018	0.327812	0.0285617	0.200501	0.453054
PID_ARF6_DOWNSTREAM_PATHWAY	0.0984943	0.280933	0.559262	0.00153111	0.0981622	0.282559	0.571376	0.0762377	0.403954	0.649105
REACTOME_TRANS_GOLGI_NETWORK_VESICLE_BUDDING	0.0432107	0.281972	0.560351	0.000551565	0.0477406	0.234563	0.522596	0.0460231	0.251828	0.510461
PID_EPHA_FWDPATHWAY	0.0535716	0.2874	0.563774	0.00217748	0.0683373	0.174761	0.451202	0.0342375	0.496568	0.732984
REACTOME_PREFOLDIN_MEDIATED_TRANSFER_OF_SUBSTRATE_TO_CCT_TRIC	0.0591766	0.287622	0.563774	0.00240507	0.0555874	0.317864	0.599435	0.00471434	0.93249	0.972933
KEGG_ABC_TRANSPORTERS	0.046125	0.290533	0.568608	0.00191727	0.0457901	0.294051	0.58173	0.0843141	0.0533536	0.207396
REACTOME_ACYL_CHAIN_REMODELLING_OF_PC	0.0645235	0.295142	0.574174	0.00195501	0.0462186	0.453311	0.720768	0.119193	0.0531225	0.207396
REACTOME_SIGNAL_REGULATORY_PROTEIN_SIRP_FAMILY_INTERACTIONS	0.0872617	0.295419	0.574174	0.00385399	0.101787	0.222285	0.509849	0.087358	0.294887	0.536349
KEGG_HISTIDINE_METABOLISM	0.055934	0.297634	0.574587	0.0014821	0.0529649	0.324019	0.605404	0.0763377	0.155187	0.382715
REACTOME_RESPONSE_TO_ELEVATED_PLATELET_CYTOSOLIC_CA2_	0.0346623	0.297486	0.574587	0.000828053	0.0323032	0.331584	0.610612	0.054358	0.102296	0.30332
BIOCARTA_PPARA_PATHWAY	0.0403943	0.301047	0.578553	0.000643488	0.0512717	0.189293	0.46974	0.0246536	0.527918	0.750534
BIOCARTA_TPO_PATHWAY	0.0604026	0.306072	0.582951	0.00343304	0.10501	0.075181	0.280916	0.0511089	0.38648	0.63013
REACTOME_GOLGI_ASSOCIATED_VESICLE_BIOGENESIS	0.0438707	0.309347	0.588312	0.000698422	0.0512735	0.234782	0.522596	0.0369983	0.391258	0.635482
REACTOME_CIRCADIAN_CLOCK	0.0423738	0.31062	0.588446	0.000852626	0.0442875	0.289277	0.57765	0.0134896	0.746863	0.887722
REACTOME_DSCAM_INTERACTIONS	0.0883158	0.310618	0.588446	0.0043778	0.117148	0.178644	0.454796	0.0573433	0.51032	0.741045
BIOCARTA_WNT_PATHWAY	0.0584057	0.312492	0.589468	0.00180069	0.0513735	0.374326	0.662589	0.0271504	0.638705	0.818441
KEGG_RNA_DEGRADATION	0.0401511	0.317447	0.591462	0.00187918	0.0508929	0.205093	0.492315	-0.0168784	0.6743	0.838088
BIOCARTA_RHO_PATHWAY	0.0538396	0.316091	0.591462	0.00213789	0.045965	0.392058	0.680101	0.0788707	0.141939	0.361978
REACTOME_SIGNAL_TRANSDUCTION_BY_L1	0.0527836	0.317505	0.591462	0.00238331	0.0594817	0.259978	0.547367	0.0391605	0.458325	0.697195
REACTOME_SYNTHESIS_OF_SUBSTRATES_IN_N_GLYCAN_BIOSYTHESIS	0.0771761	0.317601	0.591462	0.00196773	0.0693797	0.368952	0.6558	0.0703864	0.362046	0.608982
PID_RETINOIC_ACID_PATHWAY	0.0518714	0.32594	0.600617	0.00267182	0.0622206	0.238672	0.525286	0.0150123	0.776183	0.899823
REACTOME_CROSS_PRESENTATION_OF_SOLUBLE_EXOGENOUS_ANTIGENS_ENDOSOMES	0.0428396	0.326264	0.600617	0.00166506	0.0446449	0.311823	0.59623	-0.000707605	0.987063	0.992512
REACTOME_PROTEOLYTIC_CLEAVAGE_OF_SNARE_COMPLEX_PROTEINS	0.0759076	0.325621	0.600617	0.00211269	0.07747	0.315763	0.598093	0.130404	0.0912825	0.284216
PID_RXR_VDR_PATHWAY	0.0551472	0.330809	0.605694	0.00203788	0.0766067	0.176725	0.45205	0.0282228	0.618703	0.804547
KEGG_GNRH_SIGNALING_PATHWAY	0.0288302	0.333199	0.609197	0.000390669	0.0418818	0.159795	0.43005	0.0284862	0.339002	0.585674
REACTOME_AMYLOIDS	0.0386792	0.335511	0.610803	0.00134999	0.0431259	0.287566	0.576015	0.0608448	0.137351	0.358123
KEGG_STEROID_BIOSYNTHESIS	0.0691305	0.338615	0.613361	0.003209	0.0562086	0.436546	0.71334	0.120746	0.0946499	0.286712
REACTOME_MITOCHONDRIAL_PROTEIN_IMPORT	0.040222	0.340888	0.613361	0.00107702	0.0487764	0.248103	0.537416	0.00709962	0.866496	0.939002
REACTOME_SEMAPHORIN_INTERACTIONS	0.0353899	0.340157	0.613361	0.000923298	0.0321492	0.386212	0.674015	0.0654171	0.0778728	0.260647
REACTOME_METABOLISM_OF_STEROID_HORMONES_AND_VITAMINS_A_AND_D	0.0462882	0.343875	0.614646	0.00391073	0.0223231	0.648046	0.849439	0.0576258	0.238648	0.500524
KEGG_VASCULAR_SMOOTH_MUSCLE_CONTRACTION	0.0265957	0.348288	0.619933	0.000289143	0.0346946	0.221133	0.509849	0.0431311	0.12825	0.34425
REACTOME_ADHERENS_JUNCTIONS_INTERACTIONS	0.052089	0.349275	0.620826	0.00193361	0.0628857	0.258476	0.546416	0.0556056	0.317705	0.565468
KEGG_GLYCEROLIPID_METABOLISM	0.0386776	0.349782	0.620864	0.000754411	0.0254066	0.53909	0.77606	0.0693101	0.0938302	0.286712
REACTOME_REGULATION_OF_BETA_CELL_DEVELOPMENT	0.049964	0.352187	0.623429	0.00327195	0.0801175	0.135745	0.398093	0.00829984	0.877179	0.945395
REACTOME_EGFR_DOWNREGULATION	0.0632275	0.353319	0.62408	0.00202299	0.0687393	0.312935	0.59623	0.0492585	0.469614	0.707751
REACTOME_MRNA_SPLICING_MINOR_PATHWAY	0.0570341	0.354763	0.62408	0.00547301	0.0746534	0.236615	0.523736	-0.0358816	0.560441	0.772242
REACTOME_TRNA_AMINOACYLATION	0.0412636	0.355524	0.624121	0.00183693	0.0451327	0.312229	0.59623	0.0666479	0.135621	0.356098
BIOCARTA_P35ALZHEIMERS_PATHWAY	0.0841229	0.357102	0.624597	0.00123573	0.0836927	0.359567	0.644497	0.182218	0.0460695	0.190093
ST_DIFFERENTIATION_PATHWAY_IN_PC12_CELLS	0.0396798	0.357845	0.624597	0.00094701	0.0422802	0.327217	0.608638	0.0146803	0.733722	0.880052
PID_RAS_PATHWAY	0.0485131	0.358239	0.624597	0.00247196	0.0821788	0.119643	0.367557	0.0633374	0.230349	0.491951
REACTOME_IRON_UPTAKE_AND_TRANSPORT	0.044353	0.357691	0.624597	0.00202777	0.0425441	0.377637	0.667524	0.044327	0.357975	0.604527
REACTOME_ACYL_CHAIN_REMODELLING_OF_PS	0.0680875	0.361455	0.627635	0.00232532	0.0545503	0.464686	0.723956	0.129005	0.083794	0.270904
PID_LKB1_PATHWAY	0.0386589	0.365113	0.632903	0.00112593	0.0395483	0.354187	0.641881	0.0285092	0.504207	0.738867
REACTOME_APOPTOTIC_CLEAVAGE_OF_CELL_ADHESION_PROTEINS	0.0751704	0.367414	0.635393	0.00585938	0.082598	0.321985	0.603367	0.188986	0.0234495	0.122033
REACTOME_SIGNALING_BY_FGFR1_FUSION_MUTANTS	0.0610764	0.369936	0.636238	0.00354671	0.0853569	0.210196	0.497465	0.0597195	0.380664	0.624642
REACTOME_RNA_POL_I_PROMOTER_OPENING	0.0444625	0.370159	0.636238	0.00237183	0.0571342	0.256548	0.544307	0.0414836	0.417213	0.657674
REACTOME_ACYL_CHAIN_REMODELLING_OF_PI	0.0663237	0.374027	0.64076	0.00233749	0.0440726	0.55471	0.793863	0.101226	0.174857	0.413681
REACTOME_P53_DEPENDENT_G1_DNA_DAMAGE_RESPONSE	0.0366985	0.379877	0.64731	0.00215415	0.0339129	0.421964	0.702398	-0.0197304	0.636851	0.81739
KEGG_AXON_GUIDANCE	0.022873	0.381275	0.647965	0.000549134	0.0295084	0.258671	0.546416	0.0159376	0.541818	0.760995
REACTOME_GAP_JUNCTION_ASSEMBLY	0.0596741	0.381026	0.647965	0.00531461	0.0573543	0.399815	0.683282	0.0739696	0.27754	0.528994
REACTOME_TIGHT_JUNCTION_INTERACTIONS	0.04696	0.38189	0.648147	0.00159094	0.0455712	0.396127	0.68276	0.0905951	0.091618	0.284216
REACTOME_ADVANCED_GLYCOSYLATION_ENDPRODUCT_RECEPTOR_SIGNALING	0.0698676	0.383264	0.648756	0.00450855	0.0634175	0.428708	0.706953	0.0363303	0.650278	0.821814
REACTOME_RORA_ACTIVATES_CIRCADIAN_EXPRESSION	0.0523754	0.38493	0.649856	0.00158856	0.0524711	0.384063	0.672373	0.0247544	0.681332	0.841661
REACTOME_MAPK_TARGETS_NUCLEAR_EVENTS_MEDIATED_BY_MAP_KINASES	0.0466935	0.384597	0.649856	0.00204828	0.0582413	0.278152	0.567569	-0.011951	0.823899	0.918244
KEGG_VIBRIO_CHOLERAE_INFECTION	0.0354927	0.38612	0.651004	0.0014971	0.0426693	0.297452	0.584836	0.0183719	0.653712	0.822786
REACTOME_CA_DEPENDENT_EVENTS	0.0497277	0.389822	0.653796	0.0013446	0.0771842	0.181961	0.45867	0.0211737	0.714249	0.865653
REACTOME_NUCLEAR_RECEPTOR_TRANSCRIPTION_PATHWAY	0.0361378	0.392162	0.65411	0.0010958	0.0472786	0.262926	0.551397	0.0277947	0.510444	0.741045
REACTOME_PKB_MEDIATED_EVENTS	0.0468786	0.391017	0.65411	0.00154295	0.0472039	0.387739	0.675109	0.0461759	0.398158	0.641842
PID_EPHRINB_REV_PATHWAY	0.0445413	0.398944	0.661285	0.00146409	0.0462458	0.381146	0.670177	-0.0239926	0.649567	0.821814
REACTOME_P53_INDEPENDENT_G1_S_DNA_DAMAGE_CHECKPOINT	0.0369046	0.403125	0.665625	0.00176935	0.0358109	0.422648	0.702398	-0.0106321	0.809661	0.907897
BIOCARTA_MPR_PATHWAY	0.043082	0.40693	0.667438	0.00152162	0.0510459	0.3258	0.607844	0.0168837	0.749167	0.887722
REACTOME_P130CAS_LINKAGE_TO_MAPK_SIGNALING_FOR_INTEGRINS	0.0640189	0.407094	0.667438	0.00268361	0.0584615	0.449019	0.720519	0.0913438	0.236863	0.500158
REACTOME_RAP1_SIGNALLING	0.0639227	0.407799	0.667438	0.00491363	0.0905597	0.240912	0.528106	0.0400844	0.603707	0.792419
REACTOME_GABA_B_RECEPTOR_ACTIVATION	0.0416304	0.408401	0.667438	0.00127168	0.0585416	0.245018	0.532538	0.0149579	0.766438	0.895562
REACTOME_TANDEM_PORE_DOMAIN_POTASSIUM_CHANNELS	0.0687421	0.409798	0.668399	0.00253292	0.0771242	0.355094	0.641881	0.0422489	0.612447	0.800409
REACTOME_LATENT_INFECTION_OF_HOMO_SAPIENS_WITH_MYCOBACTERIUM_TUBERCULOSIS	0.0422942	0.415563	0.673971	0.00149369	0.0442464	0.394369	0.682008	0.0276506	0.594546	0.791889
KEGG_INSULIN_SIGNALING_PATHWAY	0.0205893	0.418102	0.675517	0.0004621	0.0263378	0.300302	0.587619	0.00692094	0.785484	0.9014
REACTOME_METABOLISM_OF_CARBOHYDRATES	0.0155985	0.422152	0.680342	0.000361837	0.0175954	0.365234	0.651003	0.00267517	0.890509	0.954919
BIOCARTA_CREB_PATHWAY	0.0445093	0.432516	0.688363	0.00177168	0.0809883	0.153242	0.422076	0.0294034	0.604103	0.792419
REACTOME_NEUROTRANSMITTER_RECEPTOR_BINDING_AND_DOWNSTREAM_TRANSMISSION_IN_THE_POSTSYNAPTIC_CELL	0.0206153	0.430037	0.688363	0.000863348	0.0400881	0.124904	0.378263	0.00762451	0.770398	0.895562
BIOCARTA_CDK5_PATHWAY	0.0677811	0.436466	0.690709	0.00516157	0.0685355	0.431379	0.708614	0.103996	0.232501	0.494065
BIOCARTA_AGPCR_PATHWAY	0.06463	0.438373	0.690802	0.00409535	0.0899816	0.280623	0.568362	-0.0249142	0.765144	0.895562
REACTOME_PLATELET_CALCIUM_HOMEOSTASIS	0.0561068	0.437377	0.690802	0.00217892	0.0741479	0.304725	0.591065	0.0732922	0.310339	0.554177
KEGG_PROXIMAL_TUBULE_BICARBONATE_RECLAMATION	0.0487437	0.45075	0.702511	0.00182982	0.0440812	0.495223	0.746326	0.0670675	0.299424	0.540745
REACTOME_SEMA3A_PAK_DEPENDENT_AXON_REPULSION	0.0579914	0.452674	0.703056	0.00239518	0.0669457	0.385987	0.674015	0.0137059	0.859126	0.933038
REACTOME_PACKAGING_OF_TELOMERE_ENDS	0.0383845	0.452857	0.703056	0.00313738	0.0447251	0.38176	0.670177	0.00823791	0.874003	0.944358
PID_P38_GAMMA_DELTA_PATHWAY	0.0651211	0.45468	0.703991	0.00136652	0.0599693	0.491145	0.743701	0.116597	0.180695	0.422727
REACTOME_DAG_AND_IP3_SIGNALING	0.0415258	0.455556	0.703991	0.00154584	0.0694473	0.212065	0.499525	0.0165627	0.765995	0.895562
KEGG_PURINE_METABOLISM	0.0177707	0.458057	0.705176	0.000582984	0.0194577	0.416511	0.700391	0.0227718	0.341668	0.588685
REACTOME_UNWINDING_OF_DNA	0.0643643	0.45994	0.706494	0.00441524	0.0642802	0.460526	0.721265	0.13018	0.135031	0.355787
KEGG_VIRAL_MYOCARDITIS	0.0258618	0.461952	0.708098	0.00125412	0.0106084	0.762839	0.913311	0.0476407	0.175375	0.41408
REACTOME_TRANSFERRIN_ENDOCYTOSIS_AND_RECYCLING	0.0425264	0.462092	0.708098	0.00293287	0.044981	0.436656	0.71334	0.00680909	0.906267	0.960541
REACTOME_MRNA_DECAY_BY_5_TO_3_EXORIBONUCLEASE	0.0668993	0.463954	0.70925	0.00375775	0.0609777	0.504435	0.753998	-0.0564951	0.536275	0.758038
REACTOME_INTEGRATION_OF_ENERGY_METABOLISM	0.0205787	0.465924	0.710525	0.000615064	0.0374341	0.184733	0.46111	0.0177951	0.52837	0.750534
KEGG_LONG_TERM_DEPRESSION	0.0252924	0.471868	0.713855	0.000558402	0.0267624	0.446506	0.720519	0.00688283	0.844782	0.927732
KEGG_AMINO_SUGAR_AND_NUCLEOTIDE_SUGAR_METABOLISM	0.0311278	0.480696	0.719365	0.00105333	0.0322174	0.465472	0.723956	0.0362058	0.412091	0.653878
KEGG_GLYCOSAMINOGLYCAN_BIOSYNTHESIS_CHONDROITIN_SULFATE	0.0434875	0.480441	0.719365	0.00180983	0.0499665	0.417528	0.700391	0.0203843	0.740842	0.884432
BIOCARTA_TCRA_PATHWAY	0.0586711	0.481748	0.719365	0.00578842	0.0322508	0.698977	0.876382	0.15447	0.0640021	0.232602
BIOCARTA_TGFB_PATHWAY	0.046459	0.483517	0.719365	0.00254203	0.0435648	0.511175	0.758747	0.0145058	0.826833	0.919115
PID_AJDISS_2PATHWAY	0.030615	0.478061	0.719365	0.000901471	0.036322	0.399974	0.683282	0.0458489	0.288041	0.533307
REACTOME_HORMONE_SENSITIVE_LIPASE_HSL_MEDIATED_TRIACYLGLYCEROL_HYDROLYSIS	0.0645734	0.479635	0.719365	0.00158079	0.0799559	0.38142	0.670177	0.0417034	0.648008	0.821814
PID_RHOA_PATHWAY	0.0308677	0.48437	0.719797	0.0018681	0.0558022	0.20617	0.492315	0.0118081	0.791477	0.902472
KEGG_OXIDATIVE_PHOSPHORYLATION	0.0191145	0.486497	0.721696	0.00308835	0.00948688	0.729807	0.894241	-0.0025784	0.925212	0.968511
KEGG_ARRHYTHMOGENIC_RIGHT_VENTRICULAR_CARDIOMYOPATHY_ARVC	0.0236336	0.489204	0.724453	0.00145502	0.0406756	0.233944	0.522596	0.0868459	0.0110439	0.0765268
REACTOME_INWARDLY_RECTIFYING_K_CHANNELS	0.0390842	0.490682	0.7258	0.00357722	0.0408081	0.471757	0.724641	0.00312642	0.956033	0.983811
REACTOME_ACYL_CHAIN_REMODELLING_OF_PE	0.043212	0.493314	0.728779	0.002036	0.0251357	0.690277	0.874305	0.0909811	0.149208	0.372991
KEGG_GLYCEROPHOSPHOLIPID_METABOLISM	0.0228299	0.495424	0.730279	0.000412436	0.014393	0.667358	0.860629	0.0396072	0.236938	0.500158
BIOCARTA_MAL_PATHWAY	0.0474509	0.498414	0.732152	0.0018394	0.0626934	0.371079	0.658665	0.0503204	0.486094	0.724031
REACTOME_ADENYLATE_CYCLASE_INHIBITORY_PATHWAY	0.053929	0.500949	0.734189	0.00215929	0.0870252	0.277473	0.567569	0.0730802	0.361774	0.608982
KEGG_PORPHYRIN_AND_CHLOROPHYLL_METABOLISM	0.0337105	0.503218	0.734985	0.00138202	0.0113092	0.822305	0.943362	0.0139821	0.781272	0.899839
REACTOME_TRANSPORT_OF_ORGANIC_ANIONS	0.0583207	0.503137	0.734985	0.00271532	0.046847	0.590691	0.825523	0.0575104	0.509088	0.741045
BIOCARTA_LYM_PATHWAY	0.0608765	0.505143	0.736646	0.00700888	0.00639549	0.944184	0.986268	0.151225	0.0978278	0.292795
PID_INTEGRIN2_PATHWAY	0.0348424	0.516478	0.748217	0.00292938	0.0218614	0.683957	0.869338	0.0860756	0.108986	0.310937
REACTOME_ORGANIC_CATION_ANION_ZWITTERION_TRANSPORT	0.0510842	0.523802	0.756406	0.00262266	0.0339927	0.671417	0.86325	0.0910827	0.255686	0.515007
REACTOME_PYRIMIDINE_CATABOLISM	0.0553156	0.525388	0.75784	0.00362795	0.0331789	0.703265	0.876382	0.0941459	0.27976	0.529085
KEGG_PARKINSONS_DISEASE	0.0174505	0.532617	0.76533	0.00302561	0.00505218	0.856633	0.958854	0.00781674	0.779846	0.899823
PID_TCR_RAS_PATHWAY	0.048141	0.533017	0.76533	0.00404269	0.0588905	0.445698	0.720519	0.0281476	0.715485	0.866034
REACTOME_ION_CHANNEL_TRANSPORT	0.0247679	0.533575	0.76533	0.00077821	0.0294081	0.459792	0.721265	0.0356287	0.370494	0.617845
REACTOME_ACTIVATION_OF_CHAPERONES_BY_ATF6_ALPHA	0.0540134	0.535184	0.766777	0.00240903	0.059067	0.49769	0.748291	0.0272036	0.7548	0.890328
REACTOME_ION_TRANSPORT_BY_P_TYPE_ATPASES	0.0311886	0.541904	0.771776	0.00140249	0.041412	0.418017	0.700391	0.0928399	0.0694308	0.242204
BIOCARTA_GPCR_PATHWAY	0.0319917	0.544616	0.772496	0.00247748	0.0552076	0.295791	0.582984	0.0231245	0.661442	0.827614
KEGG_DORSO_VENTRAL_AXIS_FORMATION	0.0355763	0.546624	0.773627	0.00175481	0.0563635	0.339549	0.620806	0.030695	0.602984	0.792419
REACTOME_RAF_MAP_KINASE_CASCADE	0.0550985	0.546397	0.773627	0.00162648	0.0596422	0.513815	0.761782	0.0101348	0.911659	0.963818
BIOCARTA_SARS_PATHWAY	0.0549149	0.547735	0.774342	0.00186217	0.0574001	0.529766	0.772076	0.0628554	0.491401	0.72853
BIOCARTA_GLYCOLYSIS_PATHWAY	0.0544253	0.55131	0.777205	0.00397892	0.0487871	0.593289	0.825523	0.102206	0.263202	0.517498
REACTOME_SEMA4D_INDUCED_CELL_MIGRATION_AND_GROWTH_CONE_COLLAPSE	0.0373691	0.553571	0.778011	0.0026023	0.0320294	0.611618	0.832942	0.0796037	0.206961	0.46132
REACTOME_SYNTHESIS_OF_VERY_LONG_CHAIN_FATTY_ACYL_COAS	0.0456303	0.554592	0.778011	0.00290211	0.055826	0.469727	0.724622	0.0385255	0.617857	0.804547
KEGG_NEUROACTIVE_LIGAND_RECEPTOR_INTERACTION	0.0105587	0.555959	0.779075	0.000277252	0.015151	0.398137	0.682978	0.0161994	0.366306	0.612913
REACTOME_PRE_NOTCH_PROCESSING_IN_GOLGI	0.0423558	0.557682	0.780153	0.00287055	0.0543542	0.451829	0.720768	-0.0323078	0.654728	0.823253
REACTOME_ENDOGENOUS_STEROLS	0.0436796	0.558246	0.780153	0.00634073	0.037616	0.614137	0.833122	0.0771102	0.301357	0.543465
PID_SMAD2_3PATHWAY	0.0420342	0.560676	0.782254	0.00369218	0.0418174	0.5627	0.800814	0.0113211	0.875476	0.944358
PID_ERA_GENOMIC_PATHWAY	0.0214641	0.56611	0.785547	0.000581178	0.0246857	0.509312	0.75776	0.0431936	0.248225	0.508821
BIOCARTA_EIF_PATHWAY	0.0456207	0.569143	0.78634	0.00298697	0.0583075	0.466836	0.723956	0.0213832	0.789586	0.902081
PID_WNT_CANONICAL_PATHWAY	0.0368182	0.568913	0.78634	0.0031004	0.0405729	0.530172	0.772076	-0.0200307	0.756626	0.890328
REACTOME_REGULATION_OF_IFNG_SIGNALING	0.0446975	0.576985	0.792069	0.0023103	0.0540932	0.499647	0.748593	-0.0100386	0.900306	0.958173
REACTOME_DOWNREGULATION_OF_SMAD2_3_SMAD4_TRANSCRIPTIONAL_ACTIVITY	0.0414339	0.578655	0.792627	0.00293953	0.0514446	0.490493	0.743594	0.00935622	0.900204	0.958173
REACTOME_ABCA_TRANSPORTERS_IN_LIPID_HOMEOSTASIS	0.0394386	0.585128	0.798925	0.00279827	0.0569979	0.430133	0.707477	0.0556782	0.440887	0.678902
REACTOME_FACILITATIVE_NA_INDEPENDENT_GLUCOSE_TRANSPORTERS	0.0455594	0.584875	0.798925	0.00321316	0.0541258	0.516343	0.764642	0.0926289	0.266714	0.519015
REACTOME_SPHINGOLIPID_DE_NOVO_BIOSYNTHESIS	0.028073	0.594977	0.809694	0.00202322	0.0333088	0.528178	0.772076	-0.0175471	0.739662	0.884416
REACTOME_FORMATION_OF_FIBRIN_CLOT_CLOTTING_CASCADE	0.027436	0.597409	0.809694	0.00322616	0.00534332	0.918077	0.980328	0.0559849	0.281176	0.529085
KEGG_VEGF_SIGNALING_PATHWAY	0.0177179	0.604132	0.810751	0.000488737	0.0175892	0.606763	0.830239	0.0371988	0.276365	0.528994
PID_S1P_S1P4_PATHWAY	0.0436207	0.600952	0.810751	0.00552643	0.0550347	0.509324	0.75776	0.108156	0.194688	0.445651
PID_ERBB2_ERBB3_PATHWAY	0.0228842	0.604159	0.810751	0.00173807	0.0369893	0.402047	0.684022	-0.0136625	0.75693	0.890328
REACTOME_STEROID_HORMONES	0.0281151	0.600614	0.810751	0.00406806	0.00651501	0.903443	0.974347	0.040004	0.456336	0.697195
REACTOME_CD28_DEPENDENT_PI3K_AKT_SIGNALING	0.0326644	0.604574	0.810751	0.00271006	0.0390049	0.536345	0.77606	0.0158331	0.801811	0.90664
REACTOME_INHIBITION_OF_VOLTAGE_GATED_CA2_CHANNELS_VIA_GBETA_GAMMA_SUBUNITS	0.0334968	0.604275	0.810751	0.00366578	0.0398246	0.537785	0.77606	-0.0229018	0.723086	0.869828
REACTOME_TRYPTOPHAN_CATABOLISM	0.044553	0.609001	0.815382	0.00916123	0.0351617	0.686448	0.871182	0.0985248	0.258	0.516115
REACTOME_GABA_RECEPTOR_ACTIVATION	0.0215147	0.610441	0.815751	0.00128472	0.0320118	0.44845	0.720519	-0.0226688	0.591427	0.791889
REACTOME_PLATELET_ADHESION_TO_EXPOSED_COLLAGEN	0.0433733	0.618516	0.822867	0.00208413	0.0379688	0.662903	0.858404	0.064452	0.459329	0.697195
REACTOME_NUCLEAR_EVENTS_KINASE_AND_TRANSCRIPTION_FACTOR_ACTIVATION	0.0299966	0.61876	0.822867	0.00258156	0.0433582	0.471979	0.724641	0.00244689	0.967622	0.988685
PID_ALPHA_SYNUCLEIN_PATHWAY	0.024764	0.622881	0.825216	0.00176699	0.0509946	0.311219	0.59623	0.0229796	0.648149	0.821814
REACTOME_REGULATION_OF_RHEB_GTPASE_ACTIVITY_BY_AMPK	0.0448647	0.623329	0.825216	0.001357	0.0337907	0.71145	0.881039	0.0959436	0.293579	0.535624
BIOCARTA_NO1_PATHWAY	0.0276208	0.626205	0.826827	0.00162904	0.0247786	0.662145	0.858404	0.00283118	0.960952	0.98784
BIOCARTA_AHSP_PATHWAY	0.0388195	0.628073	0.827668	0.00262505	0.0305609	0.702923	0.876382	0.0422242	0.598243	0.792419
REACTOME_ABC_FAMILY_PROTEINS_MEDIATED_TRANSPORT	0.0247292	0.628661	0.827668	0.00205939	0.0292614	0.567156	0.802686	0.0686671	0.179313	0.421038
REACTOME_ACTIVATION_OF_NMDA_RECEPTOR_UPON_GLUTAMATE_BINDING_AND_POSTSYNAPTIC_EVENTS	0.0239808	0.628847	0.827668	0.0012839	0.0351474	0.478684	0.730894	0.0386481	0.435991	0.673698
PID_VEGFR1_PATHWAY	0.0271443	0.632172	0.830334	0.00245855	0.037352	0.510103	0.758037	0.014272	0.801291	0.90664
REACTOME_SYNTHESIS_SECRETION_AND_INACTIVATION_OF_GIP	0.038113	0.634342	0.83233	0.00542594	0.0671981	0.401702	0.684022	0.0626786	0.434106	0.672522
REACTOME_CELL_EXTRACELLULAR_MATRIX_INTERACTIONS	0.0366197	0.63535	0.832797	0.00184963	0.0405124	0.599849	0.825523	0.031712	0.681324	0.841661
REACTOME_CRMPS_IN_SEMA3A_SIGNALING	0.0361036	0.640123	0.837336	0.00489932	0.028342	0.713606	0.881871	0.0987967	0.200765	0.453054
REACTOME_PPARA_ACTIVATES_GENE_EXPRESSION	0.0130545	0.649947	0.847583	0.000388857	0.0135445	0.637735	0.842819	-0.00814401	0.777083	0.899823
BIOCARTA_EIF4_PATHWAY	0.0272565	0.651157	0.848297	0.00385963	0.0748852	0.214142	0.499525	-0.00389314	0.948506	0.981788
BIOCARTA_ARENRF2_PATHWAY	0.0375189	0.652805	0.849577	0.00281336	0.0512051	0.539234	0.77606	-0.0110423	0.894666	0.95616
BIOCARTA_CSK_PATHWAY	0.0272995	0.657809	0.85112	0.00188869	0.0233965	0.704232	0.876382	0.0669155	0.277604	0.528994
REACTOME_BMAL1_CLOCK_NPAS2_ACTIVATES_CIRCADIAN_EXPRESSION	0.0216777	0.657562	0.85112	0.000919608	0.0251216	0.607459	0.830302	-0.0156765	0.74854	0.887722
BIOCARTA_AKAPCENTROSOME_PATHWAY	0.036672	0.660144	0.853048	0.00322043	0.0396855	0.634184	0.842312	-0.00660905	0.936837	0.975076
BIOCARTA_UCALPAIN_PATHWAY	0.0303343	0.665172	0.855776	0.00329966	0.0263967	0.706468	0.876382	0.0810338	0.262003	0.517498
PID_NEPHRIN_NEPH1_PATHWAY	0.0224041	0.666273	0.855776	0.00155486	0.0244145	0.638379	0.842819	-0.0129662	0.802902	0.90664
REACTOME_SIGNALING_BY_FGFR1_MUTANTS	0.0231817	0.665992	0.855776	0.00301305	0.0259859	0.628478	0.840383	0.00044263	0.993424	0.99503
REACTOME_MRNA_DECAY_BY_3_TO_5_EXORIBONUCLEASE	0.0371405	0.669817	0.857163	0.00663981	0.0663744	0.446046	0.720519	0.089299	0.305262	0.548116
REACTOME_ANTIGEN_PROCESSING_CROSS_PRESENTATION	0.0150899	0.672351	0.858406	0.000628323	0.0135353	0.706552	0.876382	-0.00646706	0.85617	0.932411
BIOCARTA_ECM_PATHWAY	0.0251775	0.676191	0.859873	0.00179945	0.0322606	0.592536	0.825523	0.0238792	0.692011	0.847564
REACTOME_SIGNALLING_TO_P38_VIA_RIT_AND_RIN	0.0313163	0.674674	0.859873	0.00285676	0.044375	0.551997	0.790866	-0.00847333	0.909578	0.962417
REACTOME_NEPHRIN_INTERACTIONS	0.0277348	0.675747	0.859873	0.00210833	0.0331328	0.617299	0.833396	-0.000907218	0.989084	0.993631
KEGG_PATHOGENIC_ESCHERICHIA_COLI_INFECTION	0.0169738	0.678528	0.861986	0.00154945	0.01049	0.797836	0.932844	0.00997291	0.807601	0.907217
REACTOME_METABOLISM_OF_VITAMINS_AND_COFACTORS	0.0168828	0.680156	0.86236	0.000886575	0.0105196	0.797279	0.932844	0.00611084	0.881383	0.949124
REACTOME_CIRCADIAN_REPRESSION_OF_EXPRESSION_BY_REV_ERBA	0.0250538	0.684373	0.863405	0.00189769	0.0267485	0.664289	0.858404	0.0153021	0.803918	0.90664
REACTOME_PLATELET_AGGREGATION_PLUG_FORMATION	0.0199906	0.687003	0.865867	0.000989475	0.0373122	0.452018	0.720768	0.0595357	0.230146	0.491951
REACTOME_MHC_CLASS_II_ANTIGEN_PRESENTATION	0.0130031	0.688502	0.866505	0.000600653	0.00933638	0.773469	0.918674	0.00372991	0.908451	0.962022
REACTOME_SEMA4D_IN_SEMAPHORIN_SIGNALING	0.0226533	0.689542	0.866505	0.00237098	0.0161712	0.775515	0.920249	0.0706183	0.21302	0.470711
REACTOME_BIOSYNTHESIS_OF_THE_N_GLYCAN_PRECURSOR_DOLICHOL_LIPID_LINKED_OLIGOSACCHARIDE_LLO_AND_TRANSFER_TO_A_NASCENT_PROTEIN	0.0221532	0.690576	0.866951	0.00131543	0.0248028	0.655825	0.855231	0.0206608	0.710447	0.864332
REACTOME_ACTIVATED_NOTCH1_TRANSMITS_SIGNAL_TO_THE_NUCLEUS	0.0234059	0.69166	0.867258	0.00394119	0.0373251	0.527087	0.772076	-0.0112172	0.849254	0.93024
BIOCARTA_AKAP95_PATHWAY	0.034888	0.702519	0.868607	0.00313987	0.0289757	0.751092	0.905562	-0.0566176	0.535391	0.757629
PID_EPHB_FWD_PATHWAY	0.0182216	0.697884	0.868607	0.00231734	0.0249408	0.595199	0.825523	-0.0221639	0.636812	0.81739
REACTOME_CTNNB1_PHOSPHORYLATION_CASCADE	0.0294025	0.703388	0.868607	0.00250196	0.0319844	0.678739	0.869167	-0.106556	0.167631	0.403263
REACTOME_SYNTHESIS_OF_PC	0.0261814	0.700727	0.868607	0.00112554	0.0123866	0.855714	0.958854	0.0243839	0.720379	0.869828
REACTOME_MRNA_SPLICING	0.0125645	0.700268	0.868607	0.00281852	0.0286014	0.383865	0.672373	-0.0442803	0.174882	0.413681
WNT_SIGNALING	0.0116235	0.707172	0.871216	0.00101505	0.0171621	0.579128	0.813325	-0.0328775	0.287983	0.533307
REACTOME_INTERACTION_BETWEEN_L1_AND_ANKYRINS	0.0237512	0.706523	0.871216	0.00367902	0.0504203	0.424105	0.703904	0.0572872	0.363783	0.61056
BIOCARTA_ERK5_PATHWAY	0.0252245	0.718936	0.878394	0.00351372	0.0525084	0.453771	0.720768	0.0317278	0.650791	0.821814
REACTOME_INTEGRIN_ALPHAIIB_BETA3_SIGNALING	0.0204219	0.718752	0.878394	0.00144338	0.0421066	0.457772	0.720768	0.0681294	0.22959	0.491951
KEGG_WNT_SIGNALING_PATHWAY	0.00861781	0.726213	0.883905	0.000843064	0.0225535	0.359451	0.644497	-0.0389103	0.113871	0.320452
PID_INTEGRIN5_PATHWAY	0.0244389	0.727334	0.884428	0.00195754	-0.00234789	0.973278	0.995495	0.0616987	0.378717	0.623479
BIOCARTA_MONOCYTE_PATHWAY	0.0315094	0.730143	0.884476	0.00614213	-0.00319775	0.972075	0.995495	0.121311	0.184177	0.428498
PID_ERBB1_RECEPTOR_PROXIMAL_PATHWAY	0.0169204	0.729341	0.884476	0.00134558	0.0364104	0.456546	0.720768	0.00823777	0.866228	0.939002
REACTOME_ENERGY_DEPENDENT_REGULATION_OF_MTOR_BY_LKB1_AMPK	0.0242876	0.728956	0.884476	0.00199882	0.0176471	0.801217	0.932844	0.0476512	0.496603	0.732984
REACTOME_PHOSPHOLIPID_METABOLISM	0.00713814	0.73429	0.888658	0.000270642	0.00284718	0.892308	0.972098	0.0137653	0.512763	0.741259
REACTOME_SOS_MEDIATED_SIGNALLING	0.0261132	0.735246	0.888973	0.00292029	0.0572444	0.458517	0.720768	-0.0221485	0.774255	0.899067
KEGG_SNARE_INTERACTIONS_IN_VESICULAR_TRANSPORT	0.0161011	0.738457	0.891169	0.000996991	0.0175864	0.715336	0.881871	0.0419604	0.384217	0.628047
BIOCARTA_BARRESTIN_SRC_PATHWAY	0.0248244	0.739339	0.891392	0.0022593	0.0465245	0.532904	0.773921	-0.0096914	0.896648	0.957476
REACTOME_FORMATION_OF_TRANSCRIPTION_COUPLED_NER_TC_NER_REPAIR_COMPLEX	0.0195748	0.74539	0.896349	0.002157	0.0404984	0.501697	0.750783	-0.0299737	0.619028	0.804547
KEGG_TAURINE_AND_HYPOTAURINE_METABOLISM	0.0286326	0.753943	0.901463	0.00225858	0.0137099	0.880699	0.968617	0.0557108	0.541948	0.760995
REACTOME_RNA_POL_I_TRANSCRIPTION	0.0118891	0.754642	0.901463	0.00188398	0.0259807	0.498363	0.748423	-0.0103371	0.789445	0.902081
BIOCARTA_EIF2_PATHWAY	0.0267006	0.759192	0.904238	0.00358764	0.0512693	0.556125	0.794997	0.0766527	0.378846	0.623479
REACTOME_AUTODEGRADATION_OF_CDH1_BY_CDH1_APC_C	0.0124763	0.760631	0.905109	0.00167688	0.0150731	0.715572	0.881871	-0.0214163	0.60101	0.792419
KEGG_SELENOAMINO_ACID_METABOLISM	0.0166951	0.768446	0.909583	0.00192934	0.0125687	0.824594	0.943712	-0.00534136	0.924957	0.968511
KEGG_CARDIAC_MUSCLE_CONTRACTION	0.0102754	0.768448	0.909583	0.00135907	0.0299361	0.39105	0.679948	0.00585274	0.866827	0.939002
KEGG_HUNTINGTONS_DISEASE	0.00678077	0.76862	0.909583	0.00175085	0.0021694	0.925016	0.982685	-0.00599251	0.79488	0.903365
KEGG_COLORECTAL_CANCER	0.0109269	0.768367	0.909583	0.000891073	0.018929	0.609921	0.832777	-0.0124037	0.738143	0.884416
REACTOME_ADENYLATE_CYCLASE_ACTIVATING_PATHWAY	0.0266128	0.770797	0.909583	0.0027288	0.066393	0.467343	0.723956	0.0736765	0.41993	0.659374
REACTOME_IL1_SIGNALING	0.0140577	0.770651	0.909583	0.000753329	-0.000385802	0.993617	0.998251	0.0611152	0.205021	0.457796
BIOCARTA_BARR_MAPK_PATHWAY	0.0237745	0.775592	0.911874	0.00190709	0.0455984	0.584553	0.819144	-0.0075284	0.928074	0.970709
REACTOME_ACTIVATION_OF_NF_KAPPAB_IN_B_CELLS	0.0110604	0.777045	0.912742	0.00161386	0.00825098	0.834192	0.945961	-0.0157968	0.685894	0.843525
PID_MAPK_TRK_PATHWAY	0.0139648	0.781535	0.915492	0.00189457	0.0218979	0.663667	0.858404	0.00431065	0.931783	0.972933
REACTOME_ASSOCIATION_OF_TRIC_CCT_WITH_TARGET_PROTEINS_DURING_BIOSYNTHESIS	0.0154875	0.784768	0.917557	0.00172584	0.0152836	0.787533	0.928475	-0.0349431	0.537764	0.759004
BIOCARTA_RARRXR_PATHWAY	0.0198432	0.790267	0.917623	0.00282975	0.0466471	0.531825	0.773233	-0.0185285	0.803869	0.90664
REACTOME_ERK_MAPK_TARGETS	0.0173735	0.788082	0.917623	0.00302798	0.0327834	0.611997	0.832942	-0.0133681	0.836142	0.924614
REACTOME_PLC_BETA_MEDIATED_EVENTS	0.0125227	0.789643	0.917623	0.00124878	0.0358405	0.445157	0.720519	0.00346584	0.941143	0.978562
REACTOME_AMINE_DERIVED_HORMONES	0.0200065	0.788581	0.917623	0.00229856	0.0157206	0.833115	0.945578	0.010607	0.886947	0.953319
REACTOME_SEROTONIN_RECEPTORS	0.0219583	0.792327	0.917623	0.00367057	0.053656	0.51999	0.767376	-0.0050666	0.951558	0.983811
REACTOME_HS_GAG_BIOSYNTHESIS	0.0136908	0.795425	0.919126	0.00134533	0.0172644	0.743708	0.90262	-0.0234562	0.656895	0.824916
REACTOME_ACTIVATION_OF_CHAPERONE_GENES_BY_XBP1S	0.0110701	0.797548	0.920746	0.00111669	0.0137197	0.750547	0.905562	0.0206427	0.632407	0.815796
REACTOME_DIABETES_PATHWAYS	0.0065469	0.800586	0.923185	0.000443468	0.0148925	0.565581	0.802234	-0.0016684	0.948677	0.981788
REACTOME_SIGNALING_BY_NOTCH1	0.00903035	0.80316	0.924336	0.00181147	0.026862	0.458418	0.720768	-0.0414431	0.252654	0.511159
REACTOME_LIPOPROTEIN_METABOLISM	0.0138435	0.80355	0.924336	0.00175451	0.0167633	0.763245	0.913311	0.069669	0.210609	0.467817
BIOCARTA_CBL_PATHWAY	0.0197065	0.805742	0.924361	0.00255659	0.0203126	0.799892	0.932844	-0.0210532	0.79276	0.902472
BIOCARTA_EGFR_SMRTE_PATHWAY	0.0214919	0.805108	0.924361	0.00284358	0.0410322	0.637585	0.842819	0.0156046	0.857818	0.932411
ST_P38_MAPK_PATHWAY	0.0118814	0.80538	0.924361	0.0011611	0.00490618	0.918962	0.980328	0.0031145	0.948503	0.981788
BIOCARTA_INTEGRIN_PATHWAY	0.0117517	0.807461	0.925503	0.00113345	0.0306798	0.524631	0.770665	0.0225252	0.645077	0.821814
KEGG_ACUTE_MYELOID_LEUKEMIA	0.0092817	0.808869	0.926285	0.00143002	0.0324556	0.39766	0.682978	0.00159912	0.966759	0.988685
KEGG_PANTOTHENATE_AND_COA_BIOSYNTHESIS	0.0173037	0.810704	0.926402	0.00288458	0.00957117	0.894601	0.972098	0.0383401	0.595625	0.791889
BIOCARTA_AGR_PATHWAY	0.0112265	0.818428	0.926402	0.00112967	0.0212697	0.663608	0.858404	-0.0270873	0.585091	0.790072
BIOCARTA_IGF1R_PATHWAY	0.0145664	0.813166	0.926402	0.00215875	0.0416564	0.499114	0.748593	0.0023207	0.969964	0.988685
ST_WNT_CA2_CYCLIC_GMP_PATHWAY	0.0151489	0.814686	0.926402	0.00220024	0.00844578	0.896034	0.972098	0.0180859	0.779612	0.899823
PID_CIRCADIAN_PATHWAY	0.0174424	0.815151	0.926402	0.00190985	0.0267051	0.720392	0.886103	-0.00299612	0.967967	0.988685
PID_UPA_UPAR_PATHWAY	0.010253	0.818423	0.926402	0.00142363	-0.0014438	0.974211	0.995495	0.0585425	0.189921	0.438676
REACTOME_SULFUR_AMINO_ACID_METABOLISM	0.0135755	0.818067	0.926402	0.00278624	0.00796208	0.89268	0.972098	0.00172886	0.976629	0.989602
REACTOME_SIGNALING_BY_NOTCH3	0.0192645	0.817322	0.926402	0.00582596	0.0204555	0.806247	0.935862	-0.00388167	0.962877	0.988461
REACTOME_TRANSPORT_TO_THE_GOLGI_AND_SUBSEQUENT_MODIFICATION	0.01209	0.810263	0.926402	0.00230705	0.0251446	0.617548	0.833396	-0.0547387	0.277029	0.528994
REACTOME_LIGAND_GATED_ION_CHANNEL_TRANSPORT	0.0148029	0.814463	0.926402	0.00281399	0.0109101	0.862683	0.959078	-0.0517125	0.412328	0.653878
REACTOME_ACTIVATED_POINT_MUTANTS_OF_FGFR2	0.016071	0.82396	0.929409	0.00352937	-0.0052492	0.942077	0.986268	-0.0205114	0.776473	0.899823
KEGG_FC_EPSILON_RI_SIGNALING_PATHWAY	0.00720709	0.826317	0.929607	0.000782534	0.0124293	0.705118	0.876382	0.0207549	0.527452	0.750534
BIOCARTA_GATA3_PATHWAY	0.016438	0.825619	0.929607	0.0032442	0.0188672	0.800359	0.932844	-0.0241202	0.746476	0.887722
REACTOME_INTEGRIN_CELL_SURFACE_INTERACTIONS	0.00715392	0.82866	0.931422	0.00143628	0.00088639	0.978607	0.996542	0.0726738	0.0279118	0.135425
PID_PS1_PATHWAY	0.00907735	0.831595	0.933081	0.00142803	0.00270736	0.949428	0.986268	-0.047658	0.264214	0.517498
BIOCARTA_SPPA_PATHWAY	0.0128167	0.835266	0.934675	0.00146168	0.0267987	0.663698	0.858404	0.0280548	0.648969	0.821814
SIG_CHEMOTAXIS	0.00914111	0.835942	0.934675	0.0013226	0.0254343	0.56448	0.802214	0.01022	0.816904	0.913643
REACTOME_RESPIRATORY_ELECTRON_TRANSPORT	0.00768581	0.83589	0.934675	0.00553982	-0.0141571	0.70278	0.876382	-0.00351664	0.924487	0.968511
BIOCARTA_PYK2_PATHWAY	0.0118862	0.837144	0.935202	0.0025793	0.0451725	0.434706	0.713163	-0.00571885	0.921221	0.968511
REACTOME_TRANSLATION	0.00556175	0.842353	0.937977	0.00112344	0.0115261	0.681604	0.869273	0.00573695	0.83819	0.925275
REACTOME_SMOOTH_MUSCLE_CONTRACTION	0.0139888	0.841809	0.937977	0.00333243	0.000256068	0.997085	0.998251	0.0463236	0.508674	0.741045
BIOCARTA_CACAM_PATHWAY	0.0178112	0.845408	0.940323	0.00163845	0.0380789	0.676786	0.868313	0.0744975	0.414769	0.656117
BIOCARTA_VEGF_PATHWAY	0.010704	0.847474	0.940983	0.00152914	0.0320283	0.564939	0.802214	0.0306807	0.581424	0.788633
BIOCARTA_HCMV_PATHWAY	0.0127996	0.855101	0.943795	0.00212354	0.0335449	0.632231	0.840781	0.0138275	0.84361	0.927244
REACTOME_SYNTHESIS_OF_PIPS_AT_THE_LATE_ENDOSOME_MEMBRANE	0.0167707	0.854335	0.943795	0.00272197	0.00464347	0.959459	0.988862	0.032451	0.722407	0.869828
REACTOME_RAS_ACTIVATION_UOPN_CA2_INFUX_THROUGH_NMDA_RECEPTOR	0.0137958	0.858212	0.94421	0.00272324	0.0398732	0.605616	0.830239	0.0455493	0.555295	0.772084
PID_INTEGRIN1_PATHWAY	0.00631422	0.859533	0.944525	0.00209329	-0.007658	0.830056	0.944791	0.0733719	0.0397453	0.170739
REACTOME_ASPARAGINE_N_LINKED_GLYCOSYLATION	0.0056962	0.861454	0.945823	0.00130673	0.0128702	0.693343	0.876382	-0.0427471	0.190294	0.438744
REACTOME_CHOLESTEROL_BIOSYNTHESIS	0.0108512	0.863418	0.947166	0.00189757	-0.00367761	0.953508	0.98745	0.0404519	0.521335	0.749748
PID_VEGFR1_2_PATHWAY	0.00595005	0.867557	0.949306	0.000830392	0.017817	0.61753	0.833396	0.0204426	0.566684	0.776273
PID_ANTHRAX_PATHWAY	0.0114591	0.870133	0.949712	0.00225085	0.00518989	0.940975	0.986268	0.0109848	0.875465	0.944358
REACTOME_MAP_KINASE_ACTIVATION_IN_TLR_CASCADE	0.00678473	0.871034	0.949712	0.000909345	0.00539297	0.897324	0.972672	-0.0252042	0.546453	0.763119
REACTOME_THE_ROLE_OF_NEF_IN_HIV1_REPLICATION_AND_DISEASE_PATHOGENESIS	0.00989669	0.872427	0.949712	0.00338968	0.0140937	0.819123	0.943098	0.0122172	0.842868	0.927244
PID_IL8_CXCR2_PATHWAY	0.00824267	0.873931	0.950539	0.00182943	0.027418	0.59765	0.825523	-0.0124193	0.811055	0.907897
KEGG_NICOTINATE_AND_NICOTINAMIDE_METABOLISM	0.00991139	0.875145	0.950837	0.00198568	0.0053134	0.93287	0.986268	0.0734972	0.243954	0.503304
REACTOME_ANTIGEN_PROCESSING_UBIQUITINATION_PROTEASOME_DEGRADATION	0.00330237	0.879692	0.952751	0.000926657	0.00292902	0.894081	0.972098	-0.0341936	0.118072	0.327266
REACTOME_REGULATION_OF_INSULIN_SECRETION	0.00484782	0.881192	0.953567	0.00101528	0.0315821	0.330218	0.608973	-0.00381799	0.906299	0.960541
REACTOME_NEGATIVE_REGULATION_OF_FGFR_SIGNALING	0.00745858	0.882252	0.953907	0.00246515	0.000307163	0.995133	0.998251	-0.04449	0.376968	0.623479
KEGG_VASOPRESSIN_REGULATED_WATER_REABSORPTION	0.00641356	0.888532	0.958483	0.00107158	0.00979156	0.83056	0.944791	-0.00151907	0.973517	0.989602
REACTOME_REVERSIBLE_HYDRATION_OF_CARBON_DIOXIDE	0.0118158	0.887335	0.958483	0.00196401	0.00809845	0.922644	0.982099	0.0429742	0.606358	0.794559
PID_CXCR3_PATHWAY	0.00608332	0.891655	0.960012	0.00139593	0.0101388	0.820411	0.943362	-0.013056	0.770031	0.895562
KEGG_RENIN_ANGIOTENSIN_SYSTEM	0.00946279	0.892606	0.960173	0.00242029	0.00472103	0.946299	0.986268	0.0169371	0.809056	0.907897
REACTOME_BILE_SALT_AND_ORGANIC_ANION_SLC_TRANSPORTERS	0.0109518	0.899942	0.96357	0.00337211	0.0118691	0.891612	0.972098	0.0235602	0.786786	0.9014
PID_INTEGRIN4_PATHWAY	0.0106513	0.902674	0.964563	0.00908981	-0.008427	0.922927	0.982099	0.0944133	0.278396	0.528994
REACTOME_ACTIVATION_OF_BH3_ONLY_PROTEINS	0.00981556	0.90251	0.964563	0.00271437	0.00446416	0.955573	0.98745	-0.0306155	0.702417	0.855379
KEGG_RIBOFLAVIN_METABOLISM	0.00826136	0.908957	0.965237	0.00230158	-0.00540246	0.940389	0.986268	0.0520603	0.471144	0.70922
KEGG_FOLATE_BIOSYNTHESIS	0.0103508	0.905406	0.965237	0.00408752	0.0107106	0.902135	0.974307	0.047605	0.584696	0.790072
BIOCARTA_BLYMPHOCYTE_PATHWAY	0.0100726	0.907938	0.965237	0.003514	-0.0114347	0.895556	0.972098	0.0813101	0.350564	0.595959
PID_AR_TF_PATHWAY	0.0046173	0.909347	0.965237	0.00147162	0.00585869	0.885126	0.970841	-0.0332952	0.411617	0.653878
REACTOME_PROTEIN_FOLDING	0.00447497	0.91213	0.967388	0.000966784	0.00382089	0.924933	0.982685	-0.0345269	0.394533	0.639174
KEGG_GLYCOSPHINGOLIPID_BIOSYNTHESIS_GANGLIO_SERIES	0.00809244	0.913627	0.968172	0.00254149	0.00552082	0.941013	0.986268	-0.0360311	0.629143	0.8152
BIOCARTA_PGC1A_PATHWAY	0.00688209	0.917336	0.969338	0.00142112	0.0221197	0.738688	0.899946	0.0164236	0.804377	0.90664
REACTOME_DOWNSTREAM_SIGNALING_EVENTS_OF_B_CELL_RECEPTOR_BCR	0.00317242	0.919257	0.969338	0.00131474	0.00721492	0.818705	0.943098	-0.0115617	0.711803	0.864332
PID_FOXO_PATHWAY	0.00423072	0.920202	0.969512	0.00123511	0.000781669	0.985233	0.998251	-0.0348223	0.409626	0.653045
REACTOME_NETRIN1_SIGNALING	0.00467341	0.922794	0.969844	0.00238403	0.0103006	0.830852	0.944791	-0.0448187	0.352667	0.597991
REACTOME_SCFSKP2_MEDIATED_DEGRADATION_OF_P27_P21	0.00411822	0.922317	0.969844	0.00196965	0.00306584	0.942742	0.986268	-0.0351288	0.405517	0.649541
PID_BMP_PATHWAY	0.00423111	0.924523	0.970863	0.00195622	0.00641656	0.885759	0.970841	-0.0347154	0.436979	0.673698
BIOCARTA_CDC42RAC_PATHWAY	0.00741806	0.929125	0.973296	0.00228801	0.0232333	0.780569	0.923301	-0.0597573	0.473672	0.712184
REACTOME_TERMINATION_OF_O_GLYCAN_BIOSYNTHESIS	0.00578722	0.934196	0.976208	0.00308903	-0.00420889	0.952117	0.986866	-0.0171319	0.806903	0.907217
PID_AR_PATHWAY	0.00277744	0.940813	0.981518	0.00068022	0.00931131	0.803427	0.933436	-0.0254254	0.496705	0.732984
REACTOME_SYNTHESIS_OF_PE	0.00631066	0.942243	0.982208	0.00268405	0.00466186	0.957316	0.98745	0.00936501	0.914379	0.965094
REACTOME_PASSIVE_TRANSPORT_BY_AQUAPORINS	0.00625536	0.945405	0.982319	0.00447367	0.0137221	0.880593	0.968617	0.0628676	0.491316	0.72853
REACTOME_HOST_INTERACTIONS_OF_HIV_FACTORS	0.00197695	0.944418	0.982319	0.000740941	0.00376726	0.894804	0.972098	-0.0425039	0.135736	0.356098
BIOCARTA_HIF_PATHWAY	0.00445043	0.952434	0.985596	0.0022328	0.0240407	0.747283	0.905149	0.050607	0.497582	0.73343
ST_INTERFERON_GAMMA_PATHWAY	0.00521484	0.954476	0.986909	0.00333252	-0.00494977	0.956787	0.98745	-0.00775735	0.932325	0.972933
REACTOME_GABA_A_RECEPTOR_ACTIVATION	0.00435697	0.958336	0.988074	0.00648212	-0.00394199	0.962301	0.989721	-0.11881	0.154278	0.381645
PID_HIF1_TFPATHWAY	0.00180505	0.959956	0.988481	0.000494468	-0.00261597	0.941993	0.986268	-0.000923457	0.979507	0.989602
BIOCARTA_ALK_PATHWAY	0.0019452	0.967381	0.98873	0.00174913	-0.00539378	0.909722	0.976995	-0.038108	0.423064	0.661098
ST_GRANULE_CELL_SURVIVAL_PATHWAY	0.00237615	0.965943	0.98873	0.00127173	-0.00776436	0.88904	0.972098	-0.0166719	0.764498	0.895562
PID_ARF6_TRAFFICKING_PATHWAY	0.00169931	0.96859	0.98873	0.00156167	-0.000463476	0.991431	0.998251	0.0639959	0.138091	0.358586
REACTOME_APC_C_CDC20_MEDIATED_DEGRADATION_OF_MITOTIC_PROTEINS	0.00167404	0.964602	0.98873	0.00181364	0.00572659	0.880345	0.968617	-0.0432965	0.251048	0.510461
PID_ALK1_PATHWAY	0.00151091	0.979155	0.993969	0.00328973	-0.00893335	0.877228	0.968216	-0.0377827	0.513516	0.741486
REACTOME_UNFOLDED_PROTEIN_RESPONSE	0.000629955	0.984795	0.995703	0.000813157	0.0124825	0.705714	0.876382	0.0192815	0.559689	0.772242
PID_LIS1_PATHWAY	0.000278331	0.996084	0.998277	0.00268158	0.0134091	0.813075	0.941659	-0.0372431	0.511338	0.741045
REACTOME_NOTCH1_INTRACELLULAR_DOMAIN_REGULATES_TRANSCRIPTION	0.000334808	0.994162	0.998277	0.00141088	0.0204132	0.65552	0.855231	-0.0593696	0.194474	0.445651
REACTOME_NGF_SIGNALLING_VIA_TRKA_FROM_THE_PLASMA_MEMBRANE	0.000225266	0.99312	0.998277	0.001008	0.020026	0.44334	0.719935	-0.0227723	0.383379	0.627482
REACTOME_SIGNALING_BY_FGFR_MUTANTS	0.000122911	0.997778	0.998277	0.00214078	0.00880425	0.841907	0.952174	-0.0114591	0.795174	0.903365
REACTOME_OPIOID_SIGNALLING	0.000158743	0.99645	0.998277	0.000705477	0.0143552	0.687439	0.871574	-0.00885272	0.804046	0.90664
REACTOME_SIGNALING_BY_ROBO_RECEPTOR	0.000463417	0.993356	0.998277	0.00142861	0.0295819	0.59503	0.825523	-0.0060652	0.913213	0.964662
REACTOME_RNA_POL_III_TRANSCRIPTION_TERMINATION	0.000151347	0.998277	0.998277	0.00344788	0.0294839	0.67401	0.865714	-0.0282069	0.687367	0.844309

## Sheet: ELL (PC2) Negative Correlations
	realstat	realp	realpadj	SubtreeVar	nomarinestat	nomarinep	nomarinepadj	nobnmrstat	nobnmrp	nobnmrpadj
KEGG_LYSOSOME	-0.107407	6.9335e-05	0.0115838	0.00103096	-0.0944102	0.00047035	0.0335838	-0.112729	2.97126e-05	0.00378835
REACTOME_CYTOCHROME_P450_ARRANGED_BY_SUBSTRATE_TYPE	-0.16763	7.2083e-05	0.0115838	0.00477134	-0.149579	0.000397318	0.0335838	-0.174193	3.71249e-05	0.00412866
KEGG_OLFACTORY_TRANSDUCTION	-0.0565471	0.000215274	0.01448	0.00306018	-0.071314	3.06196e-06	0.00195659	-0.0197818	0.195504	0.532977
PID_DNA_PK_PATHWAY	-0.284027	0.00014072	0.01448	0.00430296	-0.287414	0.000117022	0.0166171	-0.314004	2.56873e-05	0.00363903
REACTOME_GENERIC_TRANSCRIPTION_PATHWAY	-0.062873	0.000177217	0.01448	0.00114351	-0.0523494	0.00179735	0.0545872	-0.0636776	0.000146247	0.0109685
REACTOME_PHASE1_FUNCTIONALIZATION_OF_COMPOUNDS	-0.136097	0.000136526	0.01448	0.00377103	-0.121547	0.000657828	0.0335838	-0.155933	1.24066e-05	0.0030875
REACTOME_INNATE_IMMUNE_SYSTEM	-0.0703202	0.000158524	0.01448	0.000757585	-0.0625687	0.000776901	0.0367496	-0.0589258	0.00154973	0.0482135
REACTOME_DNA_REPAIR	-0.108432	0.0002358	0.0150676	0.00163381	-0.103253	0.000462569	0.0335838	-0.108108	0.00024619	0.0142678
PID_INTEGRIN2_PATHWAY	-0.18765	0.000475602	0.0243128	0.00433738	-0.186445	0.000517168	0.0335838	-0.169815	0.00156668	0.0482135
KEGG_ANTIGEN_PROCESSING_AND_PRESENTATION	-0.114258	0.000594253	0.028128	0.00174467	-0.101125	0.00236973	0.0595505	-0.0775786	0.0197135	0.177005
REACTOME_INFLAMMASOMES	-0.243775	0.000739936	0.0315213	0.00472163	-0.248306	0.000588076	0.0335838	-0.195426	0.00682884	0.100078
KEGG_HOMOLOGOUS_RECOMBINATION	-0.186316	0.000814112	0.0326969	0.00405974	-0.173888	0.0017804	0.0545872	-0.16326	0.00335012	0.0692514
REACTOME_OLFACTORY_SIGNALING_PATHWAY	-0.0549742	0.000919771	0.0348676	0.00325859	-0.0677416	4.43505e-05	0.00944666	-0.0101169	0.541956	0.791516
KEGG_PRIMARY_IMMUNODEFICIENCY	-0.159732	0.00108955	0.0397585	0.00173672	-0.157757	0.00125562	0.045848	-0.152847	0.00177483	0.0514297
REACTOME_TRAF6_MEDIATED_INDUCTION_OF_TAK1_COMPLEX	-0.296279	0.00118118	0.0407985	0.00472849	-0.281622	0.00204967	0.0582106	-0.265172	0.0036978	0.0736287
KEGG_COMPLEMENT_AND_COAGULATION_CASCADES	-0.112279	0.00140433	0.0443564	0.00451908	-0.0994171	0.00468533	0.0880566	-0.127871	0.000275528	0.0148606
REACTOME_NUCLEOTIDE_BINDING_DOMAIN_LEUCINE_RICH_REPEAT_CONTAINING_RECEPTOR_NLR_SIGNALING_PATHWAYS	-0.13871	0.00148017	0.0443564	0.00147788	-0.133414	0.00223444	0.0595505	-0.102748	0.0185495	0.170056
REACTOME_IMMUNOREGULATORY_INTERACTIONS_BETWEEN_A_LYMPHOID_AND_A_NON_LYMPHOID_CELL	-0.120984	0.00161655	0.0469536	0.00216964	-0.110278	0.00405458	0.0831314	-0.0943266	0.0139639	0.151499
REACTOME_BIOLOGICAL_OXIDATIONS	-0.0811829	0.0016645	0.0472717	0.00293765	-0.0738636	0.00422508	0.0831314	-0.0957545	0.000208316	0.0126477
KEGG_TOLL_LIKE_RECEPTOR_SIGNALING_PATHWAY	-0.0904155	0.00175989	0.047854	0.00138155	-0.0725044	0.0121295	0.145204	-0.0561942	0.0518855	0.286322
REACTOME_FANCONI_ANEMIA_PATHWAY	-0.207469	0.00175473	0.047854	0.00406423	-0.179963	0.00664657	0.107523	-0.212544	0.00134867	0.0452515
KEGG_HEMATOPOIETIC_CELL_LINEAGE	-0.0973619	0.00198077	0.0506285	0.00143384	-0.0824293	0.00882671	0.123962	-0.0870435	0.0056874	0.0926612
REACTOME_DOUBLE_STRAND_BREAK_REPAIR	-0.190238	0.00202422	0.0507245	0.00367151	-0.175672	0.00436761	0.0845728	-0.167665	0.00652028	0.0973382
KEGG_B_CELL_RECEPTOR_SIGNALING_PATHWAY	-0.103799	0.00222633	0.0536839	0.00121879	-0.113062	0.000864862	0.0367496	-0.0841737	0.0131379	0.150909
REACTOME_THE_NLRP3_INFLAMMASOME	-0.26655	0.00221203	0.0536839	0.00590886	-0.273992	0.0016574	0.05336	-0.204866	0.0186728	0.170056
REACTOME_RIP_MEDIATED_NFKB_ACTIVATION_VIA_DAI	-0.2063	0.00245812	0.0581756	0.00362534	-0.206995	0.00237643	0.0595505	-0.144981	0.0333118	0.231848
REACTOME_DOWNSTREAM_TCR_SIGNALING	-0.149067	0.00265976	0.0606994	0.00216032	-0.154569	0.00183666	0.0545872	-0.138437	0.005266	0.0902239
KEGG_BASE_EXCISION_REPAIR	-0.150169	0.0028628	0.0630802	0.00295795	-0.147351	0.00343199	0.0783229	-0.128699	0.0105958	0.132448
REACTOME_IL1_SIGNALING	-0.138677	0.00402968	0.0768646	0.00210335	-0.127424	0.00823067	0.119532	-0.140917	0.00347485	0.0703244
KEGG_LEISHMANIA_INFECTION	-0.0970756	0.00509003	0.0886865	0.00134885	-0.103355	0.00285918	0.0679601	-0.0919242	0.00798709	0.111085
REACTOME_TAK1_ACTIVATES_NFKB_BY_PHOSPHORYLATION_AND_ACTIVATION_OF_IKKS_COMPLEX	-0.167964	0.00533089	0.0908383	0.00226938	-0.158315	0.00863285	0.122586	-0.126285	0.0361773	0.242907
BIOCARTA_TCYTOTOXIC_PATHWAY	-0.217412	0.00666474	0.102621	0.00326004	-0.213794	0.00763044	0.113392	-0.228916	0.00428055	0.079097
NABA_ECM_REGULATORS	-0.0527254	0.00654764	0.102621	0.000522125	-0.0488546	0.0117564	0.145204	-0.0594138	0.00218483	0.0550247
KEGG_INTESTINAL_IMMUNE_NETWORK_FOR_IGA_PRODUCTION	-0.113264	0.00796761	0.103053	0.00195616	-0.107553	0.011747	0.145204	-0.0975398	0.022309	0.189627
PID_IL1_PATHWAY	-0.139619	0.00719686	0.103053	0.00207332	-0.139459	0.00726332	0.113156	-0.120465	0.0204006	0.180273
PID_PI3K_PLC_TRK_PATHWAY	-0.130126	0.00779306	0.103053	0.00276427	-0.145787	0.00287155	0.0679601	-0.116732	0.0169857	0.163504
REACTOME_METABOLISM_OF_STEROID_HORMONES_AND_VITAMINS_A_AND_D	-0.130206	0.00775496	0.103053	0.00378472	-0.0903053	0.0648011	0.378155	-0.124638	0.0108131	0.132564
REACTOME_TCR_SIGNALING	-0.107592	0.00797299	0.103053	0.00137342	-0.10829	0.00757595	0.113392	-0.0761697	0.0603363	0.308043
REACTOME_BASE_FREE_SUGAR_PHOSPHATE_REMOVAL_VIA_THE_SINGLE_NUCLEOTIDE_REPLACEMENT_PATHWAY	-0.244975	0.00732358	0.103053	0.00645775	-0.277689	0.00236668	0.0595505	-0.22473	0.0138883	0.151499
BIOCARTA_NFKB_PATHWAY	-0.157078	0.00916735	0.108853	0.00235966	-0.158352	0.00861715	0.122586	-0.118158	0.0499844	0.281256
PID_FANCONI_PATHWAY	-0.111422	0.00904644	0.108853	0.00237657	-0.0975505	0.0222941	0.206326	-0.118998	0.00530729	0.0902239
REACTOME_INTERFERON_ALPHA_BETA_SIGNALING	-0.0953276	0.00959318	0.110717	0.00172676	-0.0647289	0.0786197	0.390458	-0.059718	0.104675	0.424175
PID_TOLL_ENDOGENOUS_PATHWAY	-0.152524	0.00975316	0.111291	0.00195251	-0.14791	0.0122014	0.145204	-0.118371	0.0448833	0.264213
PID_RHOA_REG_PATHWAY	-0.110942	0.0119594	0.124628	0.00137539	-0.119419	0.00682298	0.108997	-0.068816	0.119	0.435522
PID_CDC42_REG_PATHWAY	-0.137078	0.0121341	0.124628	0.0013981	-0.140537	0.0101254	0.137663	-0.120754	0.0271382	0.212002
BIOCARTA_CTLA4_PATHWAY	-0.160951	0.0127657	0.12948	0.00231762	-0.157317	0.0149324	0.160639	-0.180571	0.00520943	0.0902239
BIOCARTA_CTL_PATHWAY	-0.190604	0.0135775	0.134512	0.00355758	-0.170744	0.0270316	0.22778	-0.207463	0.00721912	0.102271
REACTOME_RESOLUTION_OF_AP_SITES_VIA_THE_MULTIPLE_NUCLEOTIDE_PATCH_REPLACEMENT_PATHWAY	-0.173098	0.0135261	0.134512	0.00481217	-0.189191	0.0069504	0.109662	-0.167203	0.0170557	0.163504
KEGG_NOD_LIKE_RECEPTOR_SIGNALING_PATHWAY	-0.0883967	0.0163129	0.155082	0.00111009	-0.0826081	0.0247972	0.214127	-0.0659961	0.0729439	0.348152
REACTOME_TRANSLOCATION_OF_ZAP_70_TO_IMMUNOLOGICAL_SYNAPSE	-0.184621	0.0168134	0.157996	0.00630877	-0.19364	0.0121569	0.145204	-0.19289	0.0124949	0.147509
REACTOME_TRAF6_MEDIATED_IRF7_ACTIVATION	-0.12595	0.0170698	0.159235	0.00467818	-0.0739704	0.161267	0.516538	-0.0663432	0.208977	0.54875
KEGG_STEROID_HORMONE_BIOSYNTHESIS	-0.103847	0.0173291	0.159328	0.00490444	-0.0855824	0.0498659	0.326935	-0.113125	0.00953543	0.125337
PID_CD8_TCR_DOWNSTREAM_PATHWAY	-0.0862292	0.017306	0.159328	0.00192611	-0.0624036	0.0849808	0.393991	-0.0831676	0.0216975	0.188457
REACTOME_RIG_I_MDA5_MEDIATED_INDUCTION_OF_IFN_ALPHA_BETA_PATHWAYS	-0.0848751	0.018233	0.165261	0.00218944	-0.0615925	0.0866709	0.393991	-0.0419618	0.243136	0.574614
KEGG_GLYOXYLATE_AND_DICARBOXYLATE_METABOLISM	-0.168987	0.0193296	0.173363	0.00310205	-0.157537	0.0292107	0.233321	-0.200071	0.00561643	0.0926612
REACTOME_O_LINKED_GLYCOSYLATION_OF_MUCINS	-0.0976817	0.0194221	0.173363	0.00172953	-0.0973274	0.0198673	0.19382	-0.113596	0.00656556	0.0973382
BIOCARTA_IL1R_PATHWAY	-0.116863	0.0203022	0.177714	0.00176438	-0.116195	0.0210303	0.199835	-0.095499	0.0579007	0.302555
KEGG_GLYCOSAMINOGLYCAN_DEGRADATION	-0.14462	0.0218664	0.18385	0.00162319	-0.138706	0.027883	0.231761	-0.177822	0.00481684	0.0852983
KEGG_AUTOIMMUNE_THYROID_DISEASE	-0.0925462	0.0224788	0.186725	0.00312944	-0.0698371	0.0850388	0.393991	-0.0620416	0.126033	0.446008
KEGG_RETINOL_METABOLISM	-0.08925	0.0248738	0.202195	0.00408274	-0.0860235	0.0305989	0.24289	-0.110494	0.00548088	0.091949
REACTOME_GENERATION_OF_SECOND_MESSENGER_MOLECULES	-0.124555	0.0252116	0.202644	0.00233303	-0.123	0.0270912	0.22778	-0.0900455	0.105654	0.424766
BIOCARTA_THELPER_PATHWAY	-0.178762	0.0256928	0.205222	0.00322202	-0.173009	0.0308482	0.243353	-0.180906	0.0239716	0.199048
REACTOME_ENDOGENOUS_STEROLS	-0.163114	0.0287959	0.221694	0.00771318	-0.135013	0.0703557	0.385186	-0.180858	0.0153467	0.151682
REACTOME_STEROID_HORMONES	-0.117233	0.0290404	0.222237	0.00386848	-0.0732785	0.172416	0.528705	-0.115276	0.0318329	0.228016
BIOCARTA_IL17_PATHWAY	-0.15669	0.0300898	0.227543	0.00249298	-0.138893	0.0545357	0.345033	-0.17102	0.0179203	0.168003
REACTOME_RECYCLING_OF_BILE_ACIDS_AND_SALTS	-0.187917	0.0309728	0.229561	0.00714282	-0.168779	0.0526593	0.339892	-0.174927	0.0446137	0.264213
REACTOME_RESOLUTION_OF_AP_SITES_VIA_THE_SINGLE_NUCLEOTIDE_REPLACEMENT_PATHWAY	-0.179513	0.0313624	0.230351	0.00482085	-0.19954	0.0167304	0.169694	-0.16494	0.0479615	0.275455
REACTOME_CS_DS_DEGRADATION	-0.178891	0.0319543	0.230408	0.00430722	-0.167708	0.0443361	0.307943	-0.161988	0.0520994	0.286322
BIOCARTA_TOLL_PATHWAY	-0.101346	0.0331275	0.236519	0.00127832	-0.0996312	0.0362178	0.272272	-0.0812855	0.0874874	0.382008
REACTOME_REGULATION_OF_IFNA_SIGNALING	-0.125445	0.0335359	0.236789	0.0053381	-0.0862277	0.14399	0.493349	-0.0583773	0.322575	0.651797
BIOCARTA_DC_PATHWAY	-0.130786	0.0338356	0.237593	0.00345801	-0.110089	0.0740637	0.388462	-0.114919	0.0622389	0.313235
BIOCARTA_COMP_PATHWAY	-0.14331	0.035398	0.243722	0.0107137	-0.133581	0.0498845	0.326935	-0.14032	0.0394104	0.253909
REACTOME_BASE_EXCISION_REPAIR	-0.139312	0.0356411	0.243722	0.0041794	-0.149138	0.0245013	0.213012	-0.135492	0.041015	0.258832
REACTOME_TRAF6_MEDIATED_NFKB_ACTIVATION	-0.132514	0.035662	0.243722	0.00220828	-0.13332	0.0345548	0.265914	-0.0829754	0.188369	0.52439
PID_BCR_5PATHWAY	-0.0748943	0.0372304	0.250423	0.00123013	-0.0911624	0.0112214	0.145204	-0.0446002	0.214763	0.549845
REACTOME_NFKB_ACTIVATION_THROUGH_FADD_RIP1_PATHWAY_MEDIATED_BY_CASPASE_8_AND10	-0.169932	0.0415939	0.264462	0.0059216	-0.182179	0.0289319	0.233321	-0.118902	0.153959	0.484687
REACTOME_P2Y_RECEPTORS	-0.176342	0.0429155	0.268853	0.0051695	-0.175318	0.0441383	0.307943	-0.142325	0.102262	0.417897
REACTOME_XENOBIOTICS	-0.167452	0.0446613	0.274409	0.009587	-0.164522	0.0485304	0.324722	-0.13403	0.108037	0.428748
BIOCARTA_SET_PATHWAY	-0.181809	0.04656	0.284706	0.00666117	-0.163489	0.0734973	0.388138	-0.151618	0.0969608	0.406504
KEGG_CELL_ADHESION_MOLECULES_CAMS	-0.0502737	0.0480272	0.286565	0.00106841	-0.0396712	0.118725	0.452926	-0.03362	0.186112	0.520378
PID_BARD1_PATHWAY	-0.107857	0.0484335	0.286565	0.00147705	-0.0963067	0.0780363	0.390458	-0.132659	0.0152094	0.151499
REACTOME_FORMATION_OF_FIBRIN_CLOT_CLOTTING_CASCADE	-0.103097	0.0471929	0.286565	0.00406802	-0.0869296	0.0942582	0.404235	-0.134678	0.00952851	0.125337
REACTOME_POST_TRANSLATIONAL_PROTEIN_MODIFICATION	-0.0436961	0.048245	0.286565	0.000627414	-0.0440534	0.0464439	0.314049	-0.0668165	0.0025254	0.0607525
REACTOME_SYNTHESIS_OF_PIPS_AT_THE_EARLY_ENDOSOME_MEMBRANE	-0.164289	0.0488494	0.287694	0.00523258	-0.152247	0.0679245	0.385186	-0.1635	0.0499445	0.281256
BIOCARTA_NO2IL12_PATHWAY	-0.137019	0.0505978	0.294734	0.00300735	-0.115999	0.0979307	0.409005	-0.153192	0.0288448	0.220222
REACTOME_TERMINATION_OF_O_GLYCAN_BIOSYNTHESIS	-0.136681	0.0511711	0.294734	0.00331129	-0.116699	0.0959224	0.405923	-0.152982	0.0290641	0.220576
REACTOME_ACYL_CHAIN_REMODELLING_OF_PI	-0.145329	0.0514285	0.294734	0.0043391	-0.134367	0.0717092	0.385186	-0.150603	0.0435319	0.263152
REACTOME_BILE_ACID_AND_BILE_SALT_METABOLISM	-0.107476	0.0534506	0.303948	0.00573304	-0.0767274	0.16798	0.524885	-0.128993	0.0204553	0.180273
REACTOME_JNK_C_JUN_KINASES_PHOSPHORYLATION_AND_ACTIVATION_MEDIATED_BY_ACTIVATED_HUMAN_TAK1	-0.139486	0.0535119	0.303948	0.00345352	-0.127084	0.0785605	0.390458	-0.13744	0.057113	0.302555
REACTOME_HOMOLOGOUS_RECOMBINATION_REPAIR_OF_REPLICATION_INDEPENDENT_DOUBLE_STRAND_BREAKS	-0.138728	0.0548232	0.307299	0.00533164	-0.117276	0.104519	0.420049	-0.0959805	0.183993	0.519007
REACTOME_HS_GAG_DEGRADATION	-0.12371	0.0556143	0.309494	0.00236252	-0.121657	0.0597976	0.36487	-0.128319	0.0471052	0.271761
REACTOME_IMMUNE_SYSTEM	-0.0200227	0.057156	0.314851	0.000212739	-0.0183717	0.0814352	0.393991	-0.014077	0.181389	0.513936
PID_CD8_TCR_PATHWAY	-0.0761872	0.0578307	0.3172	0.00127886	-0.0748816	0.0622562	0.371007	-0.0619042	0.123233	0.442993
KEGG_GLYCOSPHINGOLIPID_BIOSYNTHESIS_LACTO_AND_NEOLACTO_SERIES	-0.107129	0.0588716	0.319871	0.00292488	-0.113798	0.0447759	0.309317	-0.152713	0.00708157	0.102271
KEGG_NON_HOMOLOGOUS_END_JOINING	-0.151265	0.0590685	0.319871	0.00419653	-0.150202	0.0608729	0.36696	-0.194514	0.0152074	0.151499
REACTOME_DEGRADATION_OF_THE_EXTRACELLULAR_MATRIX	-0.102095	0.0617458	0.324398	0.00186505	-0.0971618	0.0754297	0.388462	-0.0855353	0.117559	0.435522
REACTOME_SYNTHESIS_OF_PIPS_AT_THE_LATE_ENDOSOME_MEMBRANE	-0.170315	0.0622588	0.324398	0.00448312	-0.161394	0.0772625	0.390458	-0.161998	0.0761626	0.350568
REACTOME_POST_TRANSLATIONAL_MODIFICATION_SYNTHESIS_OF_GPI_ANCHORED_PROTEINS	-0.105709	0.0623062	0.324398	0.00109584	-0.0931132	0.100593	0.410974	-0.101344	0.073916	0.348152
SIG_BCR_SIGNALING_PATHWAY	-0.0790392	0.0640748	0.32755	0.00141504	-0.0965286	0.0237359	0.210656	-0.0535424	0.209719	0.54875
KEGG_CYTOSOLIC_DNA_SENSING_PATHWAY	-0.0716575	0.0665647	0.331099	0.00232827	-0.0386092	0.322915	0.699387	0.00731642	0.851412	0.938858
SA_PROGRAMMED_CELL_DEATH	-0.153218	0.0661867	0.331099	0.00341598	-0.163807	0.0495159	0.326935	-0.158188	0.0578611	0.302555
REACTOME_PD1_SIGNALING	-0.124229	0.0682027	0.333958	0.00430674	-0.116875	0.0862153	0.393991	-0.12271	0.0716452	0.344708
REACTOME_CYTOKINE_SIGNALING_IN_IMMUNE_SYSTEM	-0.0333018	0.0687624	0.335413	0.00031303	-0.0245751	0.179261	0.534023	-0.0296358	0.105319	0.424766
REACTOME_MITOCHONDRIAL_TRNA_AMINOACYLATION	-0.114121	0.0704233	0.340013	0.00422539	-0.103677	0.100258	0.410974	-0.0911447	0.148478	0.47446
REACTOME_ACTIVATED_TAK1_MEDIATES_P38_MAPK_ACTIVATION	-0.125431	0.0735286	0.350633	0.00292173	-0.117593	0.0934032	0.403274	-0.0840578	0.230426	0.560743
KEGG_OTHER_GLYCAN_DEGRADATION	-0.128951	0.0742716	0.351178	0.00325103	-0.123674	0.0869155	0.393991	-0.133408	0.0647997	0.321616
KEGG_DNA_REPLICATION	-0.0860146	0.0744673	0.351178	0.00178045	-0.0932584	0.0531198	0.340101	-0.0633316	0.189069	0.525192
KEGG_ALLOGRAFT_REJECTION	-0.0853426	0.0767612	0.35548	0.0034334	-0.0845795	0.0794359	0.390458	-0.0971608	0.0439182	0.263845
BIOCARTA_EPONFKB_PATHWAY	-0.153782	0.0774758	0.35548	0.00262935	-0.147013	0.0914477	0.398874	-0.145578	0.094655	0.399674
REACTOME_PHOSPHORYLATION_OF_CD3_AND_TCR_ZETA_CHAINS	-0.127374	0.0778829	0.35548	0.00467177	-0.134441	0.0627542	0.371295	-0.122563	0.0897896	0.389471
REACTOME_DEPOSITION_OF_NEW_CENPA_CONTAINING_NUCLEOSOMES_AT_THE_CENTROMERE	-0.0762478	0.0772532	0.35548	0.00441165	-0.0715708	0.0972232	0.407381	-0.0964916	0.0270293	0.212002
KEGG_DRUG_METABOLISM_CYTOCHROME_P450	-0.0656218	0.0793894	0.358031	0.00468748	-0.0632129	0.0910587	0.398874	-0.0953781	0.0107818	0.132564
REACTOME_INTRINSIC_PATHWAY	-0.126815	0.0791964	0.358031	0.00304412	-0.116203	0.107731	0.427053	-0.158565	0.0281742	0.216398
KEGG_FOLATE_BIOSYNTHESIS	-0.151255	0.0824723	0.362198	0.00423991	-0.145932	0.0938549	0.40386	-0.16413	0.0595211	0.308043
REACTOME_INTERFERON_SIGNALING	-0.0413327	0.0823279	0.362198	0.000569914	-0.0261498	0.271705	0.648921	-0.0290914	0.22141	0.555606
BIOCARTA_INTRINSIC_PATHWAY	-0.104415	0.0832512	0.363123	0.00399332	-0.0893655	0.138216	0.482621	-0.0869005	0.149422	0.475966
REACTOME_BETA_DEFENSINS	-0.084739	0.08313	0.363123	0.00153669	-0.0822785	0.092474	0.400616	-0.0971903	0.0468764	0.271761
KEGG_N_GLYCAN_BIOSYNTHESIS	-0.0738573	0.0869968	0.369059	0.00200079	-0.0797875	0.0644766	0.377987	-0.118834	0.00589335	0.0928139
KEGG_DRUG_METABOLISM_OTHER_ENZYMES	-0.0773007	0.0872279	0.369059	0.00255642	-0.0795975	0.0782357	0.390458	-0.119843	0.00801552	0.111085
BIOCARTA_GSK3_PATHWAY	-0.0970006	0.0871656	0.369059	0.00177822	-0.102981	0.0693699	0.385186	-0.0795206	0.160829	0.490015
BIOCARTA_TCRA_PATHWAY	-0.14228	0.0880078	0.369059	0.00391475	-0.148295	0.0753844	0.388462	-0.167913	0.0440777	0.263845
PID_TCR_PATHWAY	-0.0615931	0.0891078	0.369059	0.00128474	-0.0641265	0.0767198	0.390458	-0.0321232	0.375253	0.683562
PID_ERB_GENOMIC_PATHWAY	-0.143025	0.0863575	0.369059	0.00292279	-0.123203	0.139607	0.484832	-0.178312	0.0325137	0.231592
REACTOME_PHOSPHORYLATION_OF_THE_APC_C	-0.120843	0.0943859	0.380521	0.00813505	-0.103704	0.151152	0.501746	-0.0977358	0.176101	0.505706
REACTOME_COMPLEMENT_CASCADE	-0.0911764	0.0952512	0.381602	0.00862251	-0.0808527	0.139027	0.484134	-0.102708	0.0601997	0.308043
BIOCARTA_CLASSIC_PATHWAY	-0.132406	0.0984653	0.388391	0.0133527	-0.119099	0.137207	0.48095	-0.137093	0.0871132	0.382008
REACTOME_NUCLEOTIDE_LIKE_PURINERGIC_RECEPTORS	-0.121697	0.102861	0.398223	0.00293496	-0.117874	0.11413	0.441994	-0.0859718	0.249197	0.579544
REACTOME_NOD1_2_SIGNALING_PATHWAY	-0.0874297	0.103528	0.39852	0.00142505	-0.0778054	0.147401	0.498798	-0.0603649	0.261003	0.59451
KEGG_MISMATCH_REPAIR	-0.0977834	0.104779	0.398848	0.00281165	-0.102955	0.087655	0.393991	-0.092915	0.123231	0.442993
BIOCARTA_AHSP_PATHWAY	-0.129646	0.105685	0.398848	0.00201226	-0.104203	0.193471	0.559402	-0.1431	0.0741332	0.348152
REACTOME_INITIAL_TRIGGERING_OF_COMPLEMENT	-0.134994	0.105523	0.398848	0.00818941	-0.13847	0.0968501	0.407381	-0.134551	0.106674	0.42636
NABA_MATRISOME_ASSOCIATED	-0.018255	0.104727	0.398848	0.00023792	-0.0136236	0.226008	0.596854	-0.0132964	0.237358	0.568855
REACTOME_P75NTR_SIGNALS_VIA_NFKB	-0.140237	0.107394	0.401039	0.0032792	-0.148394	0.0884431	0.393991	-0.108386	0.213374	0.5496
PID_P38_GAMMA_DELTA_PATHWAY	-0.139313	0.109729	0.405301	0.00320904	-0.125469	0.149734	0.500941	-0.118447	0.173877	0.505706
KEGG_RIG_I_LIKE_RECEPTOR_SIGNALING_PATHWAY	-0.0544342	0.113679	0.408137	0.00232669	-0.0360354	0.29501	0.674459	-0.00819524	0.811761	0.919998
BIOCARTA_FREE_PATHWAY	-0.144791	0.112957	0.408137	0.00626871	-0.160414	0.0790772	0.390458	-0.103542	0.257013	0.588316
BIOCARTA_TCAPOPTOSIS_PATHWAY	-0.144693	0.113201	0.408137	0.00363138	-0.137528	0.132189	0.473215	-0.160478	0.078958	0.359541
PID_P38_MK2_PATHWAY	-0.102298	0.113476	0.408137	0.0027517	-0.114806	0.0756862	0.388462	-0.0477546	0.459992	0.744277
REACTOME_ACYL_CHAIN_REMODELLING_OF_PS	-0.118349	0.11268	0.408137	0.00420343	-0.105754	0.156353	0.511045	-0.109483	0.142259	0.469898
KEGG_ASTHMA	-0.0858615	0.116165	0.410107	0.00337074	-0.0938596	0.0859024	0.393991	-0.098449	0.0716408	0.344708
REACTOME_MEIOTIC_RECOMBINATION	-0.0602328	0.116486	0.410107	0.00301379	-0.0618993	0.109819	0.431051	-0.0595541	0.127329	0.447228
REACTOME_TOLL_RECEPTOR_CASCADES	-0.0437582	0.115975	0.410107	0.000639428	-0.0424188	0.127566	0.466951	-0.0368082	0.186093	0.520378
KEGG_FATTY_ACID_METABOLISM	-0.0695295	0.119512	0.419604	0.00538104	-0.0610643	0.171538	0.528705	-0.121895	0.00634643	0.0963297
KEGG_METABOLISM_OF_XENOBIOTICS_BY_CYTOCHROME_P450	-0.0596193	0.120254	0.421053	0.00410816	-0.0596632	0.119982	0.456361	-0.0852357	0.0263321	0.211477
REACTOME_INTERFERON_GAMMA_SIGNALING	-0.057969	0.121223	0.423287	0.00134022	-0.0439041	0.240529	0.613565	-0.0563399	0.13204	0.447822
ST_B_CELL_ANTIGEN_RECEPTOR	-0.0705492	0.123128	0.425098	0.00113103	-0.0952379	0.0374047	0.274079	-0.0434809	0.341997	0.658671
REACTOME_SIGNALING_BY_ILS	-0.0443161	0.123405	0.425098	0.000620742	-0.046353	0.107084	0.426333	-0.0525193	0.0678794	0.33287
BIOCARTA_MONOCYTE_PATHWAY	-0.138169	0.130396	0.443206	0.0100804	-0.127015	0.164393	0.520035	-0.113775	0.212949	0.5496
KEGG_T_CELL_RECEPTOR_SIGNALING_PATHWAY	-0.0427638	0.133358	0.448505	0.000695894	-0.0475799	0.0949141	0.405686	-0.0365852	0.199102	0.537827
REACTOME_SYNTHESIS_SECRETION_AND_INACTIVATION_OF_GIP	-0.119652	0.135392	0.451779	0.00385334	-0.137531	0.086109	0.393991	-0.0859526	0.283438	0.611211
KEGG_NATURAL_KILLER_CELL_MEDIATED_CYTOTOXICITY	-0.0386875	0.140208	0.457105	0.00137707	-0.0362581	0.166854	0.524885	-0.0126366	0.629958	0.835195
REACTOME_DEFENSINS	-0.0685661	0.138958	0.457105	0.00157857	-0.0668391	0.149187	0.500588	-0.0823707	0.0754721	0.349601
PID_PI3KCI_PATHWAY	-0.0641029	0.141856	0.458182	0.00140451	-0.0796992	0.067805	0.385186	-0.051658	0.236517	0.568382
KEGG_RIBOFLAVIN_METABOLISM	-0.105736	0.143303	0.459186	0.00195452	-0.100585	0.163831	0.520035	-0.10721	0.13781	0.459969
BIOCARTA_RELA_PATHWAY	-0.105721	0.143361	0.459186	0.00326089	-0.126816	0.079193	0.390458	-0.0704945	0.329171	0.657827
BIOCARTA_RANKL_PATHWAY	-0.112151	0.146415	0.463223	0.00318505	-0.0953227	0.217058	0.586469	-0.0698697	0.36558	0.673708
PID_HIF1_TFPATHWAY	-0.0519198	0.148689	0.465746	0.000665308	-0.0553226	0.123847	0.46145	-0.0521264	0.147081	0.474061
KEGG_STARCH_AND_SUCROSE_METABOLISM	-0.0643504	0.149624	0.46753	0.0024436	-0.0635184	0.15496	0.510881	-0.091802	0.0398288	0.253909
PID_CXCR3_PATHWAY	-0.0636979	0.153796	0.475912	0.00170605	-0.0752885	0.0918402	0.399224	-0.0508882	0.254525	0.586678
REACTOME_ACYL_CHAIN_REMODELLING_OF_PE	-0.0898796	0.154193	0.475988	0.00272233	-0.0785326	0.213137	0.582027	-0.077126	0.221447	0.555606
ST_T_CELL_SIGNAL_TRANSDUCTION	-0.0614021	0.154783	0.476658	0.00101335	-0.0719016	0.0956867	0.405923	-0.0412595	0.339031	0.658671
REACTOME_ACYL_CHAIN_REMODELLING_OF_PG	-0.102298	0.156771	0.479314	0.00449211	-0.0833742	0.248474	0.624465	-0.109655	0.129055	0.447564
KEGG_GLYCOSYLPHOSPHATIDYLINOSITOL_GPI_ANCHOR_BIOSYNTHESIS	-0.0813049	0.159724	0.482569	0.00121167	-0.0728096	0.207997	0.576617	-0.0876685	0.129508	0.447564
BIOCARTA_MAL_PATHWAY	-0.0965522	0.168351	0.498332	0.00119076	-0.118884	0.0898605	0.398756	-0.115051	0.111265	0.428748
REACTOME_PEPTIDE_HORMONE_BIOSYNTHESIS	-0.106299	0.168659	0.498332	0.00659535	-0.116301	0.132054	0.473215	-0.119912	0.120469	0.438853
REACTOME_N_GLYCAN_ANTENNAE_ELONGATION_IN_THE_MEDIAL_TRANS_GOLGI	-0.0934458	0.170135	0.498332	0.00454683	-0.0891451	0.190658	0.553774	-0.153711	0.0240419	0.199048
KEGG_JAK_STAT_SIGNALING_PATHWAY	-0.0326227	0.173126	0.502539	0.000647335	-0.0208142	0.384774	0.73835	-0.0282475	0.238191	0.569783
REACTOME_ACTIVATION_OF_IRF3_IRF7_MEDIATED_BY_TBK1_IKK_EPSILON	-0.124287	0.173647	0.502539	0.00215182	-0.093531	0.305887	0.677277	-0.128321	0.160098	0.490015
BIOCARTA_LYM_PATHWAY	-0.122377	0.180351	0.514552	0.00562296	-0.0924773	0.311368	0.682552	-0.0747059	0.413465	0.715111
BIOCARTA_D4GDI_PATHWAY	-0.107576	0.179445	0.514552	0.00435849	-0.0989233	0.217019	0.586469	-0.0509378	0.524993	0.782176
PID_INTEGRIN_CS_PATHWAY	-0.0759654	0.180375	0.514552	0.00291584	-0.0600672	0.289488	0.672004	-0.00165766	0.97668	0.9951
BIOCARTA_VDR_PATHWAY	-0.111169	0.182543	0.515222	0.00473499	-0.115707	0.165327	0.521699	-0.119065	0.153394	0.484103
BIOCARTA_FCER1_PATHWAY	-0.0645453	0.186878	0.524746	0.00245347	-0.0876508	0.0730776	0.387524	-0.0670454	0.170378	0.505706
BIOCARTA_HSP27_PATHWAY	-0.098228	0.18798	0.525687	0.00327339	-0.0903232	0.226039	0.596854	-0.0615848	0.425162	0.723753
REACTOME_REGULATION_OF_COMPLEMENT_CASCADE	-0.109598	0.188804	0.526837	0.00626062	-0.0882966	0.289729	0.672004	-0.143591	0.0851198	0.376832
BIOCARTA_FMLP_PATHWAY	-0.0653639	0.194281	0.535531	0.00159168	-0.0771054	0.125724	0.46438	-0.0677694	0.178372	0.506513
BIOCARTA_TCR_PATHWAY	-0.057951	0.194434	0.535531	0.00103385	-0.0755403	0.0907587	0.398874	-0.0678841	0.128516	0.447564
REACTOME_COMMON_PATHWAY	-0.0975943	0.2063	0.561264	0.00987222	-0.0762529	0.323425	0.699387	-0.114885	0.136828	0.459969
ST_WNT_BETA_CATENIN_PATHWAY	-0.0625104	0.20769	0.561323	0.00228186	-0.0744076	0.133682	0.475755	-0.00637689	0.897729	0.964284
REACTOME_TRANSPORT_OF_ORGANIC_ANIONS	-0.10973	0.207751	0.561323	0.0028943	-0.0982556	0.259302	0.63595	-0.111851	0.199099	0.537827
REACTOME_PLATELET_AGGREGATION_PLUG_FORMATION	-0.0625393	0.20748	0.561323	0.00129659	-0.0775989	0.117803	0.452109	-0.0411823	0.406506	0.709355
REACTOME_ACTIVATED_TLR4_SIGNALLING	-0.0388823	0.21408	0.572373	0.000797832	-0.0375973	0.229612	0.6019	-0.0363322	0.24567	0.574731
PID_ATM_PATHWAY	-0.0632978	0.215763	0.574923	0.00149643	-0.0584997	0.252608	0.626859	-0.0786972	0.123798	0.442993
KEGG_CYTOKINE_CYTOKINE_RECEPTOR_INTERACTION	-0.0227669	0.216896	0.575027	0.00086486	-0.00308883	0.866954	0.954282	-0.00151048	0.934707	0.981674
REACTOME_RECRUITMENT_OF_MITOTIC_CENTROSOME_PROTEINS_AND_COMPLEXES	-0.0461038	0.217772	0.575027	0.00101128	-0.0395053	0.290934	0.673576	-0.0437711	0.241957	0.574614
REACTOME_TRAF3_DEPENDENT_IRF_ACTIVATION_PATHWAY	-0.0953722	0.216819	0.575027	0.00213495	-0.0746769	0.333527	0.708052	-0.0776378	0.314715	0.644973
REACTOME_ACTIVATION_OF_THE_PRE_REPLICATIVE_COMPLEX	-0.0649937	0.218387	0.57546	0.00322918	-0.0718865	0.173399	0.528705	-0.0640418	0.225206	0.558145
BIOCARTA_LAIR_PATHWAY	-0.0853885	0.223129	0.581421	0.00807798	-0.0569301	0.416661	0.762883	-0.0608545	0.385275	0.689369
REACTOME_HYALURONAN_UPTAKE_AND_DEGRADATION	-0.111225	0.223379	0.581421	0.00431135	-0.0895369	0.327004	0.702371	-0.12875	0.158706	0.490015
REACTOME_RESPONSE_TO_ELEVATED_PLATELET_CYTOSOLIC_CA2_	-0.0405113	0.22336	0.581421	0.00123584	-0.0323535	0.330831	0.705816	-0.0266442	0.423227	0.723753
BIOCARTA_BLYMPHOCYTE_PATHWAY	-0.105578	0.225469	0.582368	0.00196363	-0.0952925	0.273945	0.649539	-0.0773769	0.374358	0.683562
REACTOME_TRANSPORT_OF_VITAMINS_NUCLEOSIDES_AND_RELATED_MOLECULES	-0.0623228	0.230261	0.587373	0.00114598	-0.057996	0.264254	0.640419	-0.0720367	0.165543	0.498796
REACTOME_ACYL_CHAIN_REMODELLING_OF_PC	-0.0735732	0.232579	0.588868	0.00269775	-0.0631344	0.305661	0.677277	-0.0706587	0.251608	0.582152
REACTOME_TRYPTOPHAN_CATABOLISM	-0.103953	0.232691	0.588868	0.00562803	-0.0797306	0.360001	0.722445	-0.144386	0.0973881	0.406504
BIOCARTA_P53HYPOXIA_PATHWAY	-0.0706142	0.251907	0.611737	0.00249675	-0.051952	0.399266	0.748185	-0.0865187	0.160383	0.490015
BIOCARTA_IL12_PATHWAY	-0.0705139	0.252581	0.611737	0.00145317	-0.0627496	0.308619	0.679951	-0.0697885	0.257495	0.588363
REACTOME_GLYCOSPHINGOLIPID_METABOLISM	-0.0541636	0.254852	0.613372	0.00188017	-0.0464144	0.329195	0.705816	-0.0649356	0.172224	0.505706
PID_AP1_PATHWAY	-0.0392263	0.25766	0.615809	0.000440385	-0.0397644	0.251189	0.625769	-0.0355717	0.308116	0.635677
BIOCARTA_TOB1_PATHWAY	-0.0721535	0.264268	0.622269	0.00180745	-0.0594026	0.358055	0.722445	-0.0931104	0.149696	0.475966
PID_FAS_PATHWAY	-0.0531678	0.263691	0.622269	0.00181583	-0.0697603	0.142507	0.48958	-0.0555943	0.242517	0.574614
PID_INSULIN_GLUCOSE_PATHWAY	-0.0660791	0.262848	0.622269	0.00459749	-0.0739394	0.210252	0.579099	-0.0417741	0.479042	0.760577
REACTOME_EICOSANOID_LIGAND_BINDING_RECEPTORS	-0.0860467	0.265163	0.622269	0.00385451	-0.106486	0.16791	0.524885	-0.0565841	0.463717	0.748404
REACTOME_GPCR_DOWNSTREAM_SIGNALING	-0.0122052	0.263901	0.622269	0.000807197	-0.0194578	0.0749111	0.388462	0.0213787	0.0503703	0.281256
REACTOME_PASSIVE_TRANSPORT_BY_AQUAPORINS	-0.10164	0.265852	0.622269	0.00733593	-0.109164	0.232075	0.603794	-0.0312623	0.732178	0.879855
KEGG_GALACTOSE_METABOLISM	-0.062648	0.269265	0.624023	0.00113099	-0.0586744	0.300817	0.677277	-0.0857309	0.130583	0.447564
KEGG_GRAFT_VERSUS_HOST_DISEASE	-0.0537504	0.271712	0.624023	0.00371822	-0.0545568	0.264586	0.640419	-0.0605584	0.215589	0.550855
BIOCARTA_GRANULOCYTES_PATHWAY	-0.0883212	0.27038	0.624023	0.00487465	-0.0685086	0.392585	0.743803	-0.100871	0.208101	0.54875
SA_CASPASE_CASCADE	-0.0727619	0.272494	0.624023	0.00304632	-0.063551	0.337849	0.714852	-0.0622494	0.347836	0.660914
REACTOME_NEF_MEDIATES_DOWN_MODULATION_OF_CELL_SURFACE_RECEPTORS_BY_RECRUITING_THEM_TO_CLATHRIN_ADAPTERS	-0.082035	0.271534	0.624023	0.00668395	-0.0678803	0.362918	0.722445	-0.0576783	0.439476	0.729063
REACTOME_RORA_ACTIVATES_CIRCADIAN_EXPRESSION	-0.0660863	0.272949	0.624023	0.00248486	-0.0812183	0.177878	0.534023	-0.0891419	0.139204	0.463409
REACTOME_CHROMOSOME_MAINTENANCE	-0.0317319	0.277032	0.629344	0.00190798	-0.0305852	0.294767	0.674459	-0.0266555	0.363593	0.673708
REACTOME_CIRCADIAN_REPRESSION_OF_EXPRESSION_BY_REV_ERBA	-0.0665686	0.280102	0.6347	0.00314252	-0.0831902	0.177087	0.534023	-0.0937542	0.128215	0.447564
REACTOME_MYD88_MAL_CASCADE_INITIATED_ON_PLASMA_MEMBRANE	-0.0353656	0.284671	0.64164	0.000976199	-0.0368778	0.264582	0.640419	-0.0349741	0.29004	0.617363
ST_G_ALPHA_S_PATHWAY	-0.0769861	0.286586	0.643685	0.00174406	-0.0848302	0.240308	0.613565	-0.0861234	0.233215	0.564229
REACTOME_ACTIVATION_OF_CHAPERONES_BY_ATF6_ALPHA	-0.0928234	0.286569	0.643685	0.00494877	-0.0895891	0.303694	0.677277	-0.108441	0.213139	0.5496
REACTOME_SYNTHESIS_OF_BILE_ACIDS_AND_BILE_SALTS	-0.0705753	0.287165	0.643855	0.00476288	-0.0292659	0.658949	0.873586	-0.105086	0.113008	0.43269
REACTOME_UNFOLDED_PROTEIN_RESPONSE	-0.0350675	0.288751	0.646277	0.000625999	-0.0453679	0.169918	0.528117	-0.0210435	0.524381	0.782176
ST_P38_MAPK_PATHWAY	-0.0507935	0.292189	0.651688	0.000980543	-0.0487443	0.312096	0.682976	-0.0318621	0.508778	0.773247
REACTOME_SIGNALING_BY_RHO_GTPASES	-0.0292396	0.293556	0.652461	0.000706839	-0.0328144	0.238493	0.611539	-0.0182502	0.512092	0.774506
KEGG_PRIMARY_BILE_ACID_BIOSYNTHESIS	-0.0754165	0.296525	0.654011	0.00416198	-0.0336715	0.641158	0.86863	-0.105592	0.143849	0.471484
KEGG_GLYCOSPHINGOLIPID_BIOSYNTHESIS_GANGLIO_SERIES	-0.0778867	0.296515	0.654011	0.004229	-0.0859507	0.249313	0.624465	-0.101414	0.174057	0.505706
PID_NFKAPPAB_ATYPICAL_PATHWAY	-0.0749418	0.299575	0.654731	0.00228115	-0.084608	0.241542	0.614921	-0.110935	0.124647	0.443924
REACTOME_SYNTHESIS_OF_GLYCOSYLPHOSPHATIDYLINOSITOL_GPI	-0.0726898	0.299701	0.654731	0.00128915	-0.0600606	0.391505	0.743803	-0.0618574	0.377492	0.683668
REACTOME_E2F_ENABLED_INHIBITION_OF_PRE_REPLICATION_COMPLEX_FORMATION	-0.092496	0.31127	0.661743	0.00892012	-0.0811198	0.374527	0.72667	-0.124449	0.173088	0.505706
REACTOME_SYNTHESIS_SECRETION_AND_INACTIVATION_OF_GLP1	-0.0708376	0.312184	0.661743	0.00324013	-0.0637826	0.362826	0.722445	-0.0778818	0.266504	0.600263
BIOCARTA_PTDINS_PATHWAY	-0.0632508	0.315994	0.66546	0.00304927	-0.0781587	0.215323	0.586135	-0.0506606	0.4219	0.723753
REACTOME_TRAFFICKING_AND_PROCESSING_OF_ENDOSOMAL_TLR	-0.0834048	0.317281	0.66546	0.00328715	-0.0699346	0.401723	0.748399	-0.0530972	0.524347	0.782176
REACTOME_MITOCHONDRIAL_FATTY_ACID_BETA_OXIDATION	-0.0770886	0.31815	0.66546	0.00804099	-0.0607729	0.431291	0.769597	-0.123319	0.110283	0.428748
REACTOME_PLATELET_ACTIVATION_SIGNALING_AND_AGGREGATION	-0.0215148	0.317567	0.66546	0.000431371	-0.0281421	0.191102	0.553806	-0.0110329	0.608283	0.828385
KEGG_FC_EPSILON_RI_SIGNALING_PATHWAY	-0.0322815	0.325684	0.669485	0.000672198	-0.0425165	0.195509	0.56402	-0.0312179	0.34188	0.658671
KEGG_LEUKOCYTE_TRANSENDOTHELIAL_MIGRATION	-0.0273576	0.321394	0.669485	0.00149871	-0.0271405	0.325251	0.700963	0.0157862	0.567201	0.801753
BIOCARTA_AMI_PATHWAY	-0.0636169	0.324977	0.669485	0.00436103	-0.0497301	0.441641	0.77356	-0.0461472	0.475233	0.757402
REACTOME_REPAIR_SYNTHESIS_FOR_GAP_FILLING_BY_DNA_POL_IN_TC_NER	-0.0757239	0.326793	0.669485	0.00657256	-0.0903057	0.242234	0.615457	-0.0212377	0.783302	0.902993
KEGG_ASCORBATE_AND_ALDARATE_METABOLISM	-0.0679043	0.332645	0.669856	0.00718471	-0.0737224	0.292889	0.674459	-0.12071	0.0850368	0.376832
SA_B_CELL_RECEPTOR_COMPLEXES	-0.0576282	0.328823	0.669856	0.00288901	-0.0933358	0.113755	0.441883	-0.0397537	0.50056	0.768932
REACTOME_PTM_GAMMA_CARBOXYLATION_HYPUSINE_FORMATION_AND_ARYLSULFATASE_ACTIVATION	-0.0551897	0.330437	0.669856	0.00168019	-0.042404	0.454601	0.780888	-0.0556143	0.326731	0.657827
REACTOME_METABOLISM_OF_NUCLEOTIDES	-0.0344303	0.330951	0.669856	0.00128595	-0.0317263	0.370335	0.725902	-0.0496011	0.161343	0.490015
REACTOME_RAF_MAP_KINASE_CASCADE	-0.0882727	0.33388	0.669856	0.00160436	-0.112068	0.219891	0.591622	-0.0731005	0.423574	0.723753
REACTOME_APC_C_CDC20_MEDIATED_DEGRADATION_OF_CYCLIN_B	-0.0703785	0.329967	0.669856	0.00688735	-0.0550592	0.445983	0.774412	-0.0585909	0.417358	0.719096
REACTOME_TANDEM_PORE_DOMAIN_POTASSIUM_CHANNELS	-0.0807212	0.333102	0.669856	0.00143129	-0.0786254	0.345807	0.71864	-0.10597	0.203863	0.546061
KEGG_SYSTEMIC_LUPUS_ERYTHEMATOSUS	-0.0273129	0.3447	0.68303	0.00210207	-0.0342294	0.23864	0.611539	-0.0191326	0.512209	0.774506
PID_SYNDECAN_2_PATHWAY	-0.0487909	0.347627	0.683905	0.00183158	-0.0365989	0.481115	0.795929	-0.0255381	0.623005	0.835195
REACTOME_BMAL1_CLOCK_NPAS2_ACTIVATES_CIRCADIAN_EXPRESSION	-0.0459093	0.347839	0.683905	0.00186737	-0.0596341	0.222677	0.595358	-0.0752147	0.124038	0.442993
PID_TAP63_PATHWAY	-0.0366746	0.352143	0.68895	0.000643675	-0.0263041	0.504557	0.814886	-0.0847389	0.0315689	0.228016
REACTOME_MEIOSIS	-0.0295758	0.353101	0.68895	0.00204815	-0.0301049	0.34745	0.71975	-0.0213802	0.507192	0.773247
PID_FCER1_PATHWAY	-0.0342711	0.355641	0.69219	0.00132828	-0.0532721	0.151052	0.501746	0.00175579	0.962256	0.992866
REACTOME_REMOVAL_OF_THE_FLAP_INTERMEDIATE_FROM_THE_C_STRAND	-0.0843432	0.355844	0.69219	0.00520009	-0.093531	0.305887	0.677277	-0.0527451	0.563666	0.801753
PID_IL12_STAT4_PATHWAY	-0.0469882	0.358139	0.693487	0.00125752	-0.0300061	0.557332	0.83698	-0.0624002	0.222345	0.555606
REACTOME_SHC1_EVENTS_IN_EGFR_SIGNALING	-0.068259	0.360247	0.694412	0.00237286	-0.10036	0.178578	0.534023	-0.0649377	0.384095	0.689369
REACTOME_PROTEOLYTIC_CLEAVAGE_OF_SNARE_COMPLEX_PROTEINS	-0.0702651	0.362873	0.698422	0.00219152	-0.0692572	0.369798	0.725902	-0.0425454	0.581672	0.81208
BIOCARTA_FIBRINOLYSIS_PATHWAY	-0.0754867	0.365402	0.701176	0.00836767	-0.0687704	0.409605	0.755676	-0.0825366	0.322345	0.651797
REACTOME_CHONDROITIN_SULFATE_DERMATAN_SULFATE_METABOLISM	-0.0381132	0.366803	0.701835	0.000907051	-0.0449034	0.287663	0.669643	-0.0424523	0.31479	0.644973
KEGG_ENDOMETRIAL_CANCER	-0.0359131	0.371217	0.704414	0.00125506	-0.0544548	0.175143	0.531668	-0.0272069	0.49814	0.768929
REACTOME_GLYCOPROTEIN_HORMONES	-0.0744153	0.372246	0.704414	0.00632495	-0.0866728	0.29869	0.677277	-0.089973	0.280669	0.611211
REACTOME_SYNTHESIS_OF_BILE_ACIDS_AND_BILE_SALTS_VIA_7ALPHA_HYDROXYCHOLESTEROL	-0.0655888	0.379345	0.711898	0.00634198	-0.0227821	0.760096	0.91549	-0.0863233	0.247266	0.577408
REACTOME_ETHANOL_OXIDATION	-0.0796793	0.383069	0.712609	0.00621896	-0.0845013	0.354944	0.720584	-0.129498	0.156302	0.487249
BIOCARTA_HCMV_PATHWAY	-0.0606541	0.386841	0.714426	0.00268941	-0.0854726	0.222674	0.595358	-0.0581561	0.406697	0.709355
REACTOME_GAMMA_CARBOXYLATION_TRANSPORT_AND_AMINO_TERMINAL_CLEAVAGE_OF_PROTEINS	-0.0791162	0.38644	0.714426	0.00256814	-0.059581	0.514248	0.819677	-0.106569	0.243366	0.574614
REACTOME_PI_METABOLISM	-0.0374122	0.385978	0.714426	0.00115576	-0.0362044	0.401501	0.748399	-0.0392137	0.363522	0.673708
REACTOME_ACTIVATION_OF_CHAPERONE_GENES_BY_XBP1S	-0.03718	0.388934	0.716221	0.000715481	-0.0576063	0.181916	0.536467	-0.0340937	0.429509	0.724629
BIOCARTA_BCR_PATHWAY	-0.0435017	0.402375	0.727276	0.00226751	-0.0712423	0.170257	0.528117	-0.0334134	0.5201	0.781069
REACTOME_ANTIGEN_ACTIVATES_B_CELL_RECEPTOR_LEADING_TO_GENERATION_OF_SECOND_MESSENGERS	-0.0476983	0.400276	0.727276	0.00155408	-0.0710542	0.210208	0.579099	-0.0198117	0.726815	0.876491
BIOCARTA_DNAFRAGMENT_PATHWAY	-0.0758355	0.406439	0.728847	0.00328159	-0.0777996	0.394393	0.743803	-0.069424	0.447261	0.734868
BIOCARTA_DEATH_PATHWAY	-0.0423852	0.407161	0.728847	0.00323409	-0.0492975	0.335008	0.710016	0.0145268	0.776342	0.899851
REACTOME_G_ALPHA1213_SIGNALLING_EVENTS	-0.0295728	0.407196	0.728847	0.000965446	-0.0429835	0.228321	0.601638	-0.00334851	0.92523	0.974979
REACTOME_NOTCH1_INTRACELLULAR_DOMAIN_REGULATES_TRANSCRIPTION	-0.0377657	0.409185	0.730112	0.00243837	-0.054387	0.23461	0.606947	-0.0290775	0.525131	0.782176
BIOCARTA_ATRBRCA_PATHWAY	-0.0517984	0.411551	0.731519	0.00255901	-0.0267072	0.672009	0.881074	-0.0491939	0.435463	0.72863
PID_HDAC_CLASSII_PATHWAY	-0.0416805	0.422362	0.743496	0.00154938	-0.0298152	0.566016	0.837276	-0.0621599	0.231483	0.56125
REACTOME_FORMATION_OF_ATP_BY_CHEMIOSMOTIC_COUPLING	-0.0690833	0.427705	0.750834	0.00503959	-0.0694378	0.425339	0.768357	-0.0798059	0.359548	0.671192
BIOCARTA_AKT_PATHWAY	-0.0496095	0.431594	0.751843	0.00160657	-0.0493103	0.434377	0.772442	-0.0142144	0.821712	0.925515
REACTOME_SIGNALING_BY_CONSTITUTIVELY_ACTIVE_EGFR	-0.0585742	0.432403	0.751851	0.0040958	-0.0742471	0.319662	0.694775	-0.0501083	0.501829	0.769954
KEGG_VIRAL_MYOCARDITIS	-0.0275642	0.433002	0.751871	0.00180434	-0.036126	0.304139	0.677277	-0.00676667	0.847369	0.938578
BIOCARTA_ASBCELL_PATHWAY	-0.0647933	0.437217	0.755159	0.00405507	-0.053319	0.522615	0.822797	-0.091158	0.274383	0.604211
REACTOME_SYNTHESIS_OF_BILE_ACIDS_AND_BILE_SALTS_VIA_24_HYDROXYCHOLESTEROL	-0.0703758	0.441057	0.758641	0.0076615	-0.0406273	0.6565	0.873519	-0.121826	0.182322	0.515435
BIOCARTA_MITOCHONDRIA_PATHWAY	-0.0484654	0.442291	0.758755	0.00203832	-0.0551116	0.382287	0.735787	-0.0222493	0.724298	0.876167
REACTOME_LOSS_OF_NLP_FROM_MITOTIC_CENTROSOMES	-0.0305263	0.442904	0.758755	0.00114267	-0.0260407	0.512758	0.819677	-0.0273535	0.491739	0.767851
PID_LKB1_PATHWAY	-0.0324523	0.447097	0.760839	0.00139244	-0.0323331	0.448769	0.777136	-0.02681	0.529953	0.78409
REACTOME_TELOMERE_MAINTENANCE	-0.0286841	0.446997	0.760839	0.00247791	-0.0237796	0.528429	0.824926	-0.0219853	0.563322	0.801753
PID_AMB2_NEUTROPHILS_PATHWAY	-0.0351036	0.448721	0.761575	0.00189688	-0.0528789	0.253811	0.628624	-0.0167371	0.717956	0.873467
BIOCARTA_PML_PATHWAY	-0.0526039	0.45295	0.7657	0.00190654	-0.0398709	0.569463	0.837276	-0.0862151	0.218682	0.555606
KEGG_O_GLYCAN_BIOSYNTHESIS	-0.0414395	0.456493	0.768786	0.00245435	-0.0476798	0.391575	0.743803	-0.0526992	0.34366	0.658896
KEGG_GLYCOSAMINOGLYCAN_BIOSYNTHESIS_KERATAN_SULFATE	-0.0551445	0.459836	0.768786	0.00421723	-0.057182	0.443423	0.77356	-0.116522	0.118342	0.435522
KEGG_ONE_CARBON_POOL_BY_FOLATE	-0.0515228	0.462289	0.768786	0.00284399	-0.0421647	0.547461	0.829469	-0.0625645	0.372064	0.681624
BIOCARTA_GLYCOLYSIS_PATHWAY	-0.0672543	0.461586	0.768786	0.00359623	-0.0811688	0.374239	0.72667	-0.105184	0.249545	0.579544
BIOCARTA_HIF_PATHWAY	-0.055071	0.460434	0.768786	0.00373586	-0.0481672	0.51854	0.821388	0.0224934	0.763045	0.890103
ST_TUMOR_NECROSIS_FACTOR_PATHWAY	-0.039945	0.457	0.768786	0.0014118	-0.0386814	0.471361	0.787696	-0.0225826	0.674121	0.851671
REACTOME_SYNTHESIS_OF_PIPS_AT_THE_GOLGI_MEMBRANE	-0.0548342	0.462365	0.768786	0.00319205	-0.0419476	0.573956	0.83792	-0.0537298	0.47143	0.755378
REACTOME_SHC_MEDIATED_SIGNALLING	-0.0554303	0.457513	0.768786	0.00307164	-0.0827142	0.267585	0.642808	-0.0660004	0.376361	0.683562
REACTOME_CYTOSOLIC_SULFONATION_OF_SMALL_MOLECULES	-0.0572828	0.458215	0.768786	0.00806899	-0.0667268	0.387542	0.742546	-0.0743537	0.335623	0.658671
REACTOME_FACILITATIVE_NA_INDEPENDENT_GLUCOSE_TRANSPORTERS	-0.0605383	0.467911	0.772597	0.00390276	-0.0604882	0.46828	0.786415	-0.112977	0.175531	0.505706
REACTOME_PACKAGING_OF_TELOMERE_ENDS	-0.0369998	0.469323	0.772931	0.00399323	-0.014934	0.770246	0.916636	-0.0434249	0.403207	0.707137
REACTOME_SIGNALING_BY_HIPPO	-0.0466356	0.470572	0.773225	0.00250359	-0.0244695	0.712106	0.894965	-0.0830024	0.210652	0.549247
REACTOME_P75_NTR_RECEPTOR_MEDIATED_SIGNALLING	-0.0239986	0.470711	0.773225	0.000999205	-0.0376258	0.258093	0.63595	-0.0224484	0.49985	0.768929
PID_IL12_2PATHWAY	-0.0261359	0.477616	0.778563	0.0011237	-0.0159341	0.665053	0.879735	-0.0472114	0.199568	0.537949
KEGG_VASOPRESSIN_REGULATED_WATER_REABSORPTION	-0.0319665	0.484807	0.780465	0.00105918	-0.0417886	0.361115	0.722445	0.000793358	0.986167	0.9951
BIOCARTA_TH1TH2_PATHWAY	-0.046459	0.483517	0.780465	0.00299654	-0.0122299	0.853667	0.948215	-0.0616424	0.352557	0.663974
REACTOME_INTEGRIN_CELL_SURFACE_INTERACTIONS	-0.023132	0.484057	0.780465	0.00118334	-0.0238475	0.470643	0.787696	0.0158924	0.630677	0.835195
REACTOME_PROCESSIVE_SYNTHESIS_ON_THE_LAGGING_STRAND	-0.0524498	0.482056	0.780465	0.00554788	-0.0577786	0.438681	0.773289	-0.0245044	0.74258	0.883199
PID_S1P_S1P4_PATHWAY	-0.0581405	0.485721	0.780819	0.00514385	-0.0706291	0.397065	0.746004	0.0278867	0.738097	0.881981
PID_NFKAPPAB_CANONICAL_PATHWAY	-0.0437432	0.488016	0.78254	0.00325868	-0.0415695	0.509891	0.819677	-0.00097295	0.987694	0.995369
REACTOME_ROLE_OF_DCC_IN_REGULATING_APOPTOSIS	-0.0629453	0.490781	0.78478	0.00269868	-0.0572286	0.530996	0.825066	-0.0943015	0.30192	0.630029
NABA_ECM_AFFILIATED	-0.0157451	0.491917	0.78478	0.000714252	-0.0178103	0.436922	0.772442	-0.00332538	0.884593	0.959062
PID_NFAT_3PATHWAY	-0.0274843	0.502142	0.791632	0.00130955	-0.0284536	0.487187	0.801208	-0.0428768	0.295108	0.623985
KEGG_AMINOACYL_TRNA_BIOSYNTHESIS	-0.0302076	0.503933	0.793136	0.00147266	-0.0235068	0.603018	0.850615	-0.0152915	0.73513	0.880535
REACTOME_CONVERSION_FROM_APC_C_CDC20_TO_APC_C_CDH1_IN_LATE_ANAPHASE	-0.0494692	0.507299	0.797451	0.00540253	-0.0367823	0.62201	0.855997	-0.0437319	0.557775	0.799958
BIOCARTA_TID_PATHWAY	-0.0437178	0.509693	0.799248	0.00241658	-0.0422157	0.524345	0.822797	-0.0266397	0.695748	0.862063
PID_AR_NONGENOMIC_PATHWAY	-0.0350963	0.513427	0.799608	0.00140262	-0.0529564	0.324097	0.699654	-0.0139333	0.795292	0.911717
REACTOME_SPHINGOLIPID_METABOLISM	-0.0231811	0.512752	0.799608	0.00154032	-0.0211837	0.549734	0.829469	-0.0460701	0.193304	0.531171
REACTOME_AMINE_COMPOUND_SLC_TRANSPORTERS	-0.0365464	0.511369	0.799608	0.00396934	-0.0443012	0.426	0.768357	-0.0414421	0.456466	0.74234
NABA_MATRISOME	-0.0063808	0.513676	0.799608	0.00025903	-0.00368819	0.705808	0.894965	-0.00306732	0.753567	0.885528
REACTOME_SYNTHESIS_AND_INTERCONVERSION_OF_NUCLEOTIDE_DI_AND_TRIPHOSPHATES	-0.0468195	0.516936	0.802167	0.00324899	-0.0643621	0.372983	0.72667	-0.0934817	0.195675	0.532977
REACTOME_NFKB_AND_MAP_KINASES_ACTIVATION_MEDIATED_BY_TLR4_SIGNALING_REPERTOIRE	-0.0230065	0.519055	0.80309	0.000971514	-0.0244731	0.492773	0.802853	-0.0118554	0.739687	0.882073
KEGG_ARACHIDONIC_ACID_METABOLISM	-0.0247292	0.522943	0.805606	0.00243711	-0.0166756	0.666635	0.879735	-0.018656	0.629856	0.835195
BIOCARTA_CACAM_PATHWAY	-0.0581589	0.52434	0.806385	0.00197433	-0.0705587	0.439871	0.77356	0.010674	0.906979	0.966461
PID_IL3_PATHWAY	-0.0372624	0.527781	0.81041	0.00206304	-0.0436661	0.459358	0.781107	-0.055738	0.344936	0.65953
PID_IL23_PATHWAY	-0.0298685	0.530067	0.81226	0.00129332	-0.0236067	0.619706	0.855997	-0.0313288	0.510151	0.774337
KEGG_APOPTOSIS	-0.0199336	0.533868	0.813101	0.000883421	-0.0177711	0.579154	0.841172	-0.0230106	0.472672	0.755378
BIOCARTA_CD40_PATHWAY	-0.0463825	0.534154	0.813101	0.00260652	-0.0554411	0.457426	0.781107	-0.0174004	0.815589	0.921876
BIOCARTA_BCELLSURVIVAL_PATHWAY	-0.044423	0.538619	0.814706	0.00360105	-0.0599559	0.406591	0.751987	-0.0265744	0.712991	0.87075
BIOCARTA_MTA3_PATHWAY	-0.0408991	0.537362	0.814706	0.00198665	-0.053984	0.415563	0.762781	-0.0318882	0.630579	0.835195
PID_NFAT_TFPATHWAY	-0.0259102	0.539528	0.815032	0.000945269	-0.0329047	0.435894	0.772442	-0.0406869	0.335337	0.658671
BIOCARTA_MTOR_PATHWAY	-0.0385482	0.541127	0.815519	0.00212885	-0.0489657	0.437596	0.772442	-0.015687	0.803602	0.915633
BIOCARTA_CSK_PATHWAY	-0.0374859	0.543043	0.81604	0.00167891	-0.0432571	0.482769	0.796102	-0.0556913	0.366206	0.673756
ST_FAS_SIGNALING_PATHWAY	-0.0221765	0.543611	0.81604	0.000712017	-0.0180076	0.621882	0.855997	-0.0251644	0.490702	0.767851
REACTOME_PYRIMIDINE_METABOLISM	-0.0365748	0.544027	0.81604	0.00249669	-0.0111857	0.852792	0.948215	-0.0700738	0.245056	0.574731
REACTOME_PURINE_RIBONUCLEOSIDE_MONOPHOSPHATE_BIOSYNTHESIS	-0.0525999	0.545921	0.816411	0.00341394	-0.0695603	0.424522	0.768357	-0.0338221	0.697793	0.862063
REACTOME_TRNA_AMINOACYLATION	-0.0268585	0.547584	0.817537	0.00194266	-0.0163094	0.714977	0.894965	-0.0199282	0.655447	0.844137
KEGG_NUCLEOTIDE_EXCISION_REPAIR	-0.0264254	0.554059	0.818599	0.00147407	-0.0335354	0.452722	0.780808	-0.017283	0.698771	0.862063
PID_P75_NTR_PATHWAY	-0.020854	0.553052	0.818599	0.000700864	-0.026463	0.451609	0.77994	-0.0215379	0.540113	0.791462
REACTOME_REGULATION_OF_HYPOXIA_INDUCIBLE_FACTOR_HIF_BY_OXYGEN	-0.0427615	0.553914	0.818599	0.00300957	-0.0217555	0.763309	0.91597	-0.0534477	0.459408	0.744277
REACTOME_SIGNALING_BY_FGFR_MUTANTS	-0.0264429	0.54914	0.818599	0.00183117	-0.0287815	0.514383	0.819677	-0.0349581	0.428387	0.724629
REACTOME_INCRETIN_SYNTHESIS_SECRETION_AND_INACTIVATION	-0.038528	0.551104	0.818599	0.00260865	-0.0572375	0.375844	0.72667	-0.0316074	0.624821	0.835195
REACTOME_DNA_STRAND_ELONGATION	-0.0312758	0.553655	0.818599	0.00233513	-0.0421968	0.424227	0.768357	-0.0200532	0.704123	0.86423
REACTOME_CD28_DEPENDENT_VAV1_PATHWAY	-0.0532011	0.560299	0.824957	0.000849864	-0.0458711	0.615559	0.855997	-0.0526225	0.564573	0.801753
REACTOME_CIRCADIAN_CLOCK	-0.0242974	0.560978	0.825006	0.00135548	-0.0371328	0.374266	0.72667	-0.0465582	0.265261	0.598598
BIOCARTA_LECTIN_PATHWAY	-0.0502627	0.563905	0.826458	0.0147454	-0.0398403	0.647388	0.869078	-0.0402957	0.643635	0.840312
KEGG_LINOLEIC_ACID_METABOLISM	-0.0332401	0.565413	0.827338	0.00279732	-0.0275807	0.633397	0.865767	-0.0372081	0.519941	0.781069
PID_ILK_PATHWAY	-0.0250182	0.566448	0.827338	0.00180929	-0.0267286	0.540218	0.82796	-0.00153548	0.971932	0.9951
REACTOME_SIGNALING_BY_FGFR1_FUSION_MUTANTS	-0.0391156	0.565825	0.827338	0.00320369	-0.0424127	0.533539	0.8255	-0.026885	0.693088	0.862063
PID_IFNG_PATHWAY	-0.0261639	0.572328	0.832122	0.0012849	-0.0252769	0.585421	0.842697	-0.0246997	0.594015	0.821008
KEGG_FRUCTOSE_AND_MANNOSE_METABOLISM	-0.0283277	0.573747	0.833237	0.00119321	-0.0384698	0.444899	0.77358	-0.0438346	0.384038	0.689369
KEGG_PANTOTHENATE_AND_COA_BIOSYNTHESIS	-0.0402426	0.577502	0.834581	0.00190888	-0.0474497	0.51131	0.819677	-0.0872884	0.226953	0.558937
REACTOME_INTEGRIN_ALPHAIIB_BETA3_SIGNALING	-0.0315599	0.577843	0.834581	0.00162111	-0.0487545	0.389926	0.743803	0.000514773	0.992757	0.995882
PID_ANTHRAX_PATHWAY	-0.0387592	0.580275	0.835318	0.00403183	-0.0388683	0.579211	0.841172	-0.0542456	0.438973	0.729063
KEGG_TASTE_TRANSDUCTION	-0.0229753	0.582488	0.836216	0.00135131	-0.0334246	0.423837	0.768357	-0.0102038	0.807111	0.916355
KEGG_TYPE_I_DIABETES_MELLITUS	-0.02466	0.585356	0.836216	0.00244557	-0.0257536	0.568832	0.837276	-0.0373655	0.408422	0.711391
BIOCARTA_EXTRINSIC_PATHWAY	-0.0435483	0.586818	0.836216	0.00817637	-0.0249512	0.755517	0.91549	-0.0752869	0.34746	0.660914
BIOCARTA_AKAP13_PATHWAY	-0.0495532	0.5875	0.836216	0.00219428	-0.0374296	0.681994	0.883743	-0.0635172	0.48685	0.766339
PID_ARF6_DOWNSTREAM_PATHWAY	-0.0497123	0.5863	0.836216	0.00204806	-0.0589561	0.51867	0.821388	-0.0326838	0.720499	0.873919
REACTOME_INHIBITION_OF_THE_PROTEOLYTIC_ACTIVITY_OF_APC_C_REQUIRED_FOR_THE_ONSET_OF_ANAPHASE_BY_MITOTIC_SPINDLE_CHECKPOINT_COMPONENTS	-0.0379881	0.587831	0.836216	0.00538216	-0.0248386	0.723058	0.901529	-0.0443828	0.526594	0.783439
BIOCARTA_TFF_PATHWAY	-0.0348695	0.589541	0.836512	0.0028073	-0.0582924	0.367109	0.724021	-0.0332699	0.606726	0.828377
PID_ERA_GENOMIC_PATHWAY	-0.0201072	0.590911	0.836512	0.000887668	-0.0304261	0.416008	0.762781	-0.0149096	0.69021	0.862063
REACTOME_PEPTIDE_CHAIN_ELONGATION	-0.0217886	0.591057	0.836512	0.00297304	-0.0182393	0.656049	0.873519	0.0186305	0.649162	0.840312
REACTOME_SYNTHESIS_OF_PC	-0.0364607	0.592486	0.836681	0.00148962	-0.0306871	0.652364	0.873006	-0.0197906	0.771416	0.896586
REACTOME_PHASE_II_CONJUGATION	-0.0192885	0.600216	0.838335	0.00292498	-0.0195736	0.59484	0.84492	-0.031902	0.386047	0.689369
KEGG_GLYCINE_SERINE_AND_THREONINE_METABOLISM	-0.0266917	0.60739	0.844662	0.00321955	-0.00891346	0.863768	0.954282	-0.0689056	0.184708	0.519873
REACTOME_ACTIVATED_AMPK_STIMULATES_FATTY_ACID_OXIDATION_IN_MUSCLE	-0.0350447	0.606936	0.844662	0.0016445	-0.0364715	0.592376	0.84492	-0.0733153	0.281812	0.611211
REACTOME_COSTIMULATION_BY_THE_CD28_FAMILY	-0.0192327	0.607155	0.844662	0.000936931	-0.0173817	0.642179	0.86863	-0.0170756	0.648049	0.840312
KEGG_VEGF_SIGNALING_PATHWAY	-0.0174335	0.609949	0.846092	0.000447707	-0.0179081	0.600256	0.848592	-0.0111859	0.743422	0.883377
BIOCARTA_CELL2CELL_PATHWAY	-0.0404491	0.613715	0.84884	0.0057368	-0.0483232	0.546482	0.829469	0.0486368	0.543882	0.79229
REACTOME_LAGGING_STRAND_SYNTHESIS	-0.033056	0.618115	0.853079	0.00369795	-0.0436746	0.510111	0.819677	-0.00654424	0.921381	0.972484
KEGG_CHEMOKINE_SIGNALING_PATHWAY	-0.0107929	0.621782	0.853907	0.00105103	-0.0139058	0.525033	0.822797	0.0250595	0.252038	0.582152
PID_ECADHERIN_NASCENT_AJ_PATHWAY	-0.024857	0.621576	0.853907	0.00190872	-0.038522	0.444283	0.77356	-0.0223335	0.662285	0.847969
PID_TCR_CALCIUM_PATHWAY	-0.0274325	0.622056	0.853907	0.00154876	-0.0296228	0.594521	0.84492	-0.0750269	0.177604	0.505706
REACTOME_SYNTHESIS_OF_PIPS_AT_THE_PLASMA_MEMBRANE	-0.0260605	0.621642	0.853907	0.00172965	-0.0281462	0.594017	0.84492	-0.0239517	0.650125	0.840312
BIOCARTA_EPO_PATHWAY	-0.0318111	0.631405	0.854811	0.00269735	-0.0615757	0.353079	0.720584	-0.0261544	0.693257	0.862063
BIOCARTA_CDK5_PATHWAY	-0.0417372	0.631817	0.854811	0.00286234	-0.0598133	0.492273	0.802853	-0.0665133	0.445095	0.734147
PID_AURORA_B_PATHWAY	-0.022815	0.626944	0.854811	0.0019016	-0.0157752	0.736824	0.909338	-0.0564599	0.229065	0.560571
PID_CXCR4_PATHWAY	-0.014015	0.632866	0.854811	0.00111731	-0.0210186	0.473739	0.78881	0.0233713	0.425684	0.723753
PID_EPHRINB_REV_PATHWAY	-0.0258232	0.624819	0.854811	0.00160905	-0.038021	0.471508	0.787696	-0.026855	0.611053	0.828385
REACTOME_REGULATION_OF_SIGNALING_BY_CBL	-0.032594	0.632311	0.854811	0.00162501	-0.0432644	0.525354	0.822797	-0.0310558	0.648466	0.840312
PID_CMYB_PATHWAY	-0.0150191	0.639259	0.85681	0.000536601	-0.0123021	0.701024	0.89412	-0.0118559	0.711375	0.86961
REACTOME_AMINE_LIGAND_BINDING_RECEPTORS	-0.0223532	0.638415	0.85681	0.00211277	-0.0333045	0.483842	0.796843	0.000829121	0.986094	0.9951
REACTOME_EARLY_PHASE_OF_HIV_LIFE_CYCLE	-0.0376703	0.638285	0.85681	0.00304888	-0.0281662	0.725218	0.90327	-0.0597982	0.47337	0.755378
PID_RHOA_PATHWAY	-0.0204232	0.643597	0.861274	0.000798727	-0.0352928	0.423979	0.768357	-0.00229659	0.958989	0.992866
KEGG_NICOTINATE_AND_NICOTINAMIDE_METABOLISM	-0.0287477	0.648576	0.864317	0.00180747	-0.0194688	0.757594	0.91549	-0.0262229	0.677619	0.852852
KEGG_SPHINGOLIPID_METABOLISM	-0.0210168	0.650152	0.864422	0.00135449	-0.0212603	0.646375	0.86863	-0.0519206	0.262517	0.59451
REACTOME_ANDROGEN_BIOSYNTHESIS	-0.041278	0.65136	0.864422	0.00698698	-0.00579515	0.949416	0.986467	-0.0567157	0.534685	0.789031
REACTOME_TIGHT_JUNCTION_INTERACTIONS	-0.0243453	0.650317	0.864422	0.00194323	-0.0239279	0.655923	0.873519	-0.0062667	0.907106	0.966461
BIOCARTA_STATHMIN_PATHWAY	-0.0293333	0.666753	0.87756	0.00266374	-0.0289497	0.670854	0.881074	-0.0641356	0.346449	0.660914
PID_ARF6_TRAFFICKING_PATHWAY	-0.0186105	0.666286	0.87756	0.00192837	-0.0142584	0.741097	0.910309	0.0187556	0.663845	0.847969
KEGG_ETHER_LIPID_METABOLISM	-0.0218946	0.668522	0.878079	0.000896239	-0.0203432	0.690749	0.888106	-0.00388609	0.939421	0.984192
REACTOME_CLASS_A1_RHODOPSIN_LIKE_RECEPTORS	-0.00724714	0.675108	0.882529	0.000788859	-0.00658879	0.703154	0.894965	0.0225313	0.192539	0.530211
PID_TCR_JNK_PATHWAY	-0.0322369	0.676346	0.882792	0.00159636	-0.0430865	0.576877	0.840648	-0.0139074	0.857078	0.942226
PID_EPO_PATHWAY	-0.0208803	0.678399	0.883786	0.00210922	-0.036813	0.464752	0.782547	0.0167864	0.738871	0.882073
BIOCARTA_WNT_PATHWAY	-0.0235467	0.683867	0.886391	0.00163238	-0.0267313	0.643893	0.86863	0.00339595	0.95317	0.992866
REACTOME_TRIF_MEDIATED_TLR3_SIGNALING	-0.0140299	0.687699	0.889554	0.000919331	-0.0108557	0.755776	0.91549	-0.00486163	0.889219	0.960333
BIOCARTA_ECM_PATHWAY	-0.0241167	0.689106	0.889574	0.00130664	-0.0432568	0.473016	0.78881	0.00909644	0.880055	0.955767
PID_TNF_PATHWAY	-0.0172745	0.68894	0.889574	0.000808196	-0.0202767	0.638455	0.86863	-0.022199	0.60697	0.828377
PID_SYNDECAN_3_PATHWAY	-0.0278118	0.691519	0.89026	0.00284013	-0.033177	0.63597	0.867417	-0.0638343	0.362437	0.673625
REACTOME_ADAPTIVE_IMMUNE_SYSTEM	-0.00543115	0.692425	0.89026	0.000313958	-0.0101401	0.461554	0.781852	0.00168011	0.902709	0.966461
BIOCARTA_P35ALZHEIMERS_PATHWAY	-0.0359163	0.694188	0.890603	0.00159261	-0.0213551	0.815159	0.934656	-0.0277941	0.760927	0.888831
PID_P38_MKK3_6PATHWAY	-0.0221061	0.696665	0.891032	0.00197268	-0.0208361	0.713298	0.894965	-0.0267351	0.637316	0.839203
PID_HEDGEHOG_2PATHWAY	-0.0240229	0.696702	0.891032	0.000802607	-0.0225711	0.7142	0.894965	-0.0136062	0.825276	0.926557
REACTOME_BOTULINUM_NEUROTOXICITY	-0.0270198	0.708398	0.893271	0.00143548	-0.0261004	0.717889	0.895959	-0.00812485	0.910456	0.967643
REACTOME_SRP_DEPENDENT_COTRANSLATIONAL_PROTEIN_TARGETING_TO_MEMBRANE	-0.0128435	0.705126	0.893271	0.00212989	-0.00629115	0.85394	0.948215	0.0186226	0.585796	0.814492
REACTOME_HYALURONAN_METABOLISM	-0.0287376	0.709788	0.893271	0.00265324	-0.0124768	0.871645	0.955371	-0.021947	0.776253	0.899851
REACTOME_THROMBIN_SIGNALLING_THROUGH_PROTEINASE_ACTIVATED_RECEPTORS_PARS	-0.021249	0.702589	0.893271	0.00177445	-0.043751	0.431769	0.769597	0.00295869	0.9576	0.992866
REACTOME_GLUTATHIONE_CONJUGATION	-0.0224695	0.70934	0.893271	0.00330045	-0.0123381	0.837826	0.943627	-0.0228812	0.704263	0.86423
PID_LYSOPHOSPHOLIPID_PATHWAY	-0.0133125	0.713277	0.89401	0.0022084	-0.0228266	0.528649	0.824926	0.0255386	0.480857	0.76087
REACTOME_APOPTOTIC_CLEAVAGE_OF_CELL_ADHESION_PROTEINS	-0.0307436	0.712403	0.89401	0.00781962	-0.0384191	0.645041	0.86863	0.0550993	0.508827	0.773247
BIOCARTA_CASPASE_PATHWAY	-0.0215579	0.720627	0.898499	0.00267283	-0.0186019	0.757638	0.91549	0.00212668	0.971857	0.9951
PID_GMCSF_PATHWAY	-0.0172609	0.720382	0.898499	0.00144987	-0.0434967	0.36705	0.724021	-0.0478513	0.321044	0.651797
REACTOME_SIGNALING_BY_THE_B_CELL_RECEPTOR_BCR	-0.00989702	0.718611	0.898499	0.00112	-0.0174017	0.528214	0.824926	0.0123945	0.651818	0.840312
REACTOME_THE_ROLE_OF_NEF_IN_HIV1_REPLICATION_AND_DISEASE_PATHOGENESIS	-0.022145	0.719366	0.898499	0.0038487	-0.0180926	0.769097	0.916636	-0.0110791	0.85734	0.942226
PID_PI3KCI_AKT_PATHWAY	-0.0174701	0.724746	0.900997	0.00165459	-0.0255772	0.606185	0.852053	-0.00496703	0.920254	0.972484
BIOCARTA_CARM_ER_PATHWAY	-0.0168671	0.73388	0.902172	0.00278305	-0.0267373	0.589949	0.844403	-0.0132852	0.788875	0.906957
BIOCARTA_NTHI_PATHWAY	-0.0204169	0.729375	0.902172	0.00139989	-0.0203731	0.729934	0.905685	0.00176467	0.976146	0.9951
BIOCARTA_SPRY_PATHWAY	-0.0227777	0.738098	0.902172	0.00256454	-0.0521285	0.44413	0.77356	-0.0433363	0.524665	0.782176
PID_IL5_PATHWAY	-0.026087	0.735502	0.902172	0.00353413	-0.0344272	0.655729	0.873519	-0.0200291	0.795351	0.911717
PID_ALPHA_SYNUCLEIN_PATHWAY	-0.0169148	0.736946	0.902172	0.0010868	-0.0326356	0.516928	0.820663	-0.04557	0.365496	0.673708
REACTOME_A_TETRASACCHARIDE_LINKER_SEQUENCE_IS_REQUIRED_FOR_GAG_SYNTHESIS	-0.0195732	0.735002	0.902172	0.00200041	-0.028705	0.619616	0.855997	-0.0036415	0.949789	0.990982
REACTOME_EXTENSION_OF_TELOMERES	-0.0186094	0.738081	0.902172	0.00301264	-0.03407	0.5404	0.82796	0.00278585	0.960075	0.992866
REACTOME_SHC_RELATED_EVENTS	-0.0244013	0.735542	0.902172	0.00341725	-0.0492046	0.495815	0.806173	-0.0335955	0.641911	0.840079
KEGG_ABC_TRANSPORTERS	-0.0140247	0.747926	0.906642	0.00192603	-0.0115006	0.792137	0.925459	-0.0319317	0.464344	0.748469
PID_RXR_VDR_PATHWAY	-0.0181858	0.748441	0.906642	0.00159082	-0.0281733	0.619318	0.855997	-0.0306266	0.589142	0.817363
REACTOME_UNWINDING_OF_DNA	-0.0280585	0.747353	0.906642	0.0034762	-0.0394504	0.650608	0.872484	-0.0432707	0.619346	0.834743
PID_HIV_NEF_PATHWAY	-0.0155697	0.750195	0.907907	0.00147944	-0.0233835	0.632535	0.865767	0.00107297	0.982495	0.9951
KEGG_PRION_DISEASES	-0.0157441	0.750991	0.90801	0.00215218	-0.0133795	0.787412	0.925459	-0.0396567	0.424111	0.723753
REACTOME_SYNTHESIS_SECRETION_AND_DEACYLATION_OF_GHRELIN	-0.0244073	0.751953	0.908314	0.00402798	-8.75565e-06	0.99991	0.99991	-0.0306873	0.691082	0.862063
BIOCARTA_PLATELETAPP_PATHWAY	-0.0241011	0.754965	0.909778	0.00300789	-0.0171698	0.824048	0.937785	0.0107808	0.88897	0.960333
BIOCARTA_INTEGRIN_PATHWAY	-0.0145728	0.762496	0.909857	0.0021202	-0.037037	0.442454	0.77356	0.0284292	0.561011	0.801753
PID_FRA_PATHWAY	-0.0145923	0.759023	0.909857	0.000942815	-0.0264838	0.577698	0.840886	-0.00471054	0.921118	0.972484
REACTOME_EXTRINSIC_PATHWAY_FOR_APOPTOSIS	-0.0243693	0.761042	0.909857	0.00504171	-0.0331441	0.679156	0.883347	-0.013641	0.86483	0.946487
REACTOME_SEROTONIN_RECEPTORS	-0.0250704	0.763715	0.909857	0.00312378	-0.0342218	0.68156	0.883743	-0.0181826	0.827416	0.926557
REACTOME_REGULATION_OF_IFNG_SIGNALING	-0.0244353	0.760415	0.909857	0.00238004	-0.0052184	0.948077	0.985877	-0.0540876	0.499692	0.768929
BIOCARTA_CYTOKINE_PATHWAY	-0.018883	0.764669	0.909913	0.00230374	-0.00212361	0.973144	0.993381	-0.0112284	0.858719	0.942226
KEGG_PARKINSONS_DISEASE	-0.00817169	0.770123	0.911312	0.00279685	-0.0107703	0.700136	0.89407	-0.0169244	0.545046	0.792398
BIOCARTA_VEGF_PATHWAY	-0.0165013	0.766837	0.911312	0.00115967	-0.0172362	0.756774	0.91549	-0.0217478	0.695953	0.862063
REACTOME_TRANSCRIPTIONAL_REGULATION_OF_WHITE_ADIPOCYTE_DIFFERENTIATION	-0.0101413	0.768217	0.911312	0.00082245	-0.0257393	0.454467	0.780888	-0.0204798	0.551745	0.795786
PID_ATR_PATHWAY	-0.0133696	0.775785	0.914112	0.00175668	-0.00668086	0.886825	0.962924	-0.00748181	0.873365	0.953223
REACTOME_SHC1_EVENTS_IN_ERBB4_SIGNALING	-0.0182804	0.777303	0.914112	0.0027333	-0.0497056	0.441866	0.77356	-0.0217055	0.737	0.881497
REACTOME_LATENT_INFECTION_OF_HOMO_SAPIENS_WITH_MYCOBACTERIUM_TUBERCULOSIS	-0.0147275	0.776795	0.914112	0.00149605	-0.0152335	0.76934	0.916636	-0.0111827	0.829563	0.926557
REACTOME_CHEMOKINE_RECEPTORS_BIND_CHEMOKINES	-0.0111385	0.777496	0.914112	0.00237177	-0.00287199	0.941916	0.983333	0.057908	0.141798	0.469591
PID_MAPK_TRK_PATHWAY	-0.0141694	0.778418	0.914355	0.00123726	-0.0169014	0.737147	0.909338	-0.0114684	0.819846	0.924587
PID_AURORA_A_PATHWAY	-0.0149693	0.780447	0.915102	0.00152068	-0.00605343	0.910254	0.971268	-0.0292834	0.585567	0.814492
REACTOME_GLUCURONIDATION	-0.0242743	0.780486	0.915102	0.00798837	-0.0400185	0.645918	0.86863	-0.0549477	0.528147	0.78409
REACTOME_TRAF6_MEDIATED_INDUCTION_OF_NFKB_AND_MAP_KINASES_UPON_TLR7_8_OR_9_ACTIVATION	-0.00947074	0.783145	0.916465	0.00101107	-0.00988836	0.773838	0.918356	-0.0123324	0.720057	0.873919
REACTOME_SEMA4D_INDUCED_CELL_MIGRATION_AND_GROWTH_CONE_COLLAPSE	-0.0170443	0.787002	0.916853	0.00119704	-0.0158876	0.801143	0.929937	0.00822479	0.896259	0.964284
REACTOME_PLATELET_ADHESION_TO_EXPOSED_COLLAGEN	-0.0231502	0.790408	0.919146	0.00278599	-0.0111116	0.89849	0.969762	-0.0536886	0.537642	0.791462
PID_AR_PATHWAY	-0.00979595	0.793421	0.920761	0.000550507	-0.0097325	0.79473	0.925459	-0.00419441	0.910723	0.967643
BIOCARTA_BARRESTIN_SRC_PATHWAY	-0.0192308	0.796596	0.921762	0.00238387	-0.0424053	0.569784	0.837276	-0.0320008	0.667985	0.849884
REACTOME_SIGNAL_REGULATORY_PROTEIN_SIRP_FAMILY_INTERACTIONS	-0.0213767	0.797707	0.921762	0.00380134	-0.0259804	0.755408	0.91549	-0.017968	0.82942	0.926557
REACTOME_ACTIVATION_OF_ATR_IN_RESPONSE_TO_REPLICATION_STRESS	-0.0125947	0.796757	0.921762	0.00221307	-0.0178567	0.715002	0.894965	-0.0221635	0.650394	0.840312
PID_RHODOPSIN_PATHWAY	-0.0150623	0.798549	0.921902	0.00509779	-0.0112246	0.849155	0.948215	0.00686942	0.907336	0.966461
REACTOME_REGULATION_OF_RHEB_GTPASE_ACTIVITY_BY_AMPK	-0.0222426	0.807624	0.929022	0.00199368	-0.0279343	0.759757	0.91549	0.0609681	0.504502	0.771238
PID_PLK1_PATHWAY	-0.0108294	0.808408	0.929088	0.00315448	0.0057752	0.897111	0.969153	-0.0303712	0.496482	0.768929
REACTOME_RNA_POL_I_PROMOTER_OPENING	-0.0118694	0.810922	0.930303	0.00360304	-0.0259339	0.606551	0.852053	-0.0107712	0.833164	0.92857
BIOCARTA_TGFB_PATHWAY	-0.0157443	0.812313	0.931064	0.00339165	-0.0140439	0.832264	0.940574	0.000319625	0.996154	0.998107
ST_JNK_MAPK_PATHWAY	-0.0107573	0.816425	0.934938	0.00168926	-0.00547784	0.905899	0.971268	-0.0315365	0.496146	0.768929
KEGG_PATHOGENIC_ESCHERICHIA_COLI_INFECTION	-0.00893099	0.827366	0.940112	0.00127138	-0.00969219	0.812915	0.934656	0.00957389	0.815157	0.921876
BIOCARTA_ACE2_PATHWAY	-0.0174551	0.827563	0.940112	0.00257819	0.00846163	0.915904	0.972236	0.00385228	0.961657	0.992866
PID_KIT_PATHWAY	-0.00840267	0.834279	0.946899	0.00152672	-0.0282351	0.482042	0.795929	-0.00500786	0.900769	0.965921
REACTOME_N_GLYCAN_ANTENNAE_ELONGATION	-0.0155105	0.840813	0.950937	0.00590345	-0.0173274	0.822459	0.93718	-0.0764993	0.321864	0.651797
KEGG_LYSINE_DEGRADATION	-0.00876381	0.842623	0.951274	0.00123538	-0.0083036	0.850788	0.948215	-0.0384206	0.384084	0.689369
REACTOME_TRANSPORT_TO_THE_GOLGI_AND_SUBSEQUENT_MODIFICATION	-0.00994353	0.843466	0.951274	0.00145128	-0.0142766	0.776787	0.920903	-0.0483147	0.337334	0.658671
REACTOME_ENERGY_DEPENDENT_REGULATION_OF_MTOR_BY_LKB1_AMPK	-0.0134411	0.847926	0.954757	0.00169665	-0.018491	0.791924	0.925459	0.0159342	0.820163	0.924587
REACTOME_PURINE_SALVAGE	-0.0150154	0.851362	0.956762	0.00364407	-0.00749998	0.925431	0.976302	-0.0143388	0.857986	0.942226
KEGG_REGULATION_OF_AUTOPHAGY	-0.00948992	0.857375	0.956965	0.00316477	0.0289855	0.583062	0.842697	0.0416298	0.43048	0.724629
REACTOME_PPARA_ACTIVATES_GENE_EXPRESSION	-0.00522787	0.855782	0.956965	0.000289101	-0.0107163	0.709486	0.894965	-0.00841864	0.769775	0.895495
REACTOME_YAP1_AND_WWTR1_TAZ_STIMULATED_GENE_EXPRESSION	-0.0109335	0.856073	0.956965	0.00206667	-0.0253779	0.673763	0.88134	-0.0417305	0.488774	0.767472
BIOCARTA_MYOSIN_PATHWAY	-0.00879298	0.865592	0.957311	0.000986145	-0.0140091	0.787415	0.925459	-0.0115791	0.82362	0.926557
SIG_REGULATION_OF_THE_ACTIN_CYTOSKELETON_BY_RHO_GTPASES	-0.00872909	0.868701	0.957311	0.00155613	-0.0152379	0.772911	0.918356	0.0134357	0.799155	0.913424
PID_IL4_2PATHWAY	-0.00641688	0.860496	0.957311	0.000447026	0.00206218	0.954961	0.989011	-0.0272888	0.454838	0.741584
REACTOME_KERATAN_SULFATE_KERATIN_METABOLISM	-0.00903996	0.86407	0.957311	0.00134894	-0.00989929	0.851293	0.948215	-0.0469247	0.374195	0.683562
REACTOME_PURINE_METABOLISM	-0.00843869	0.86892	0.957311	0.00165075	-0.00835381	0.870227	0.955201	0.00337921	0.94731	0.990042
REACTOME_APC_CDC20_MEDIATED_DEGRADATION_OF_NEK2A	-0.0119539	0.860702	0.957311	0.0042612	0.000872101	0.989786	0.996772	-0.0214876	0.752432	0.885528
KEGG_TYROSINE_METABOLISM	-0.00640476	0.887318	0.962436	0.00319287	0.0178495	0.692915	0.889996	-0.048593	0.282343	0.611211
KEGG_PORPHYRIN_AND_CHLOROPHYLL_METABOLISM	-0.00778222	0.877182	0.962436	0.00190359	-0.00159539	0.974726	0.993381	-0.0395667	0.432027	0.725737
KEGG_NEUROTROPHIN_SIGNALING_PATHWAY	-0.00375545	0.887973	0.962436	0.000643434	-0.00879415	0.741496	0.910309	-0.00503356	0.850241	0.938578
BIOCARTA_AKAP95_PATHWAY	-0.0133431	0.883867	0.962436	0.00392375	0.00951973	0.917	0.972236	-0.0553799	0.54435	0.79229
BIOCARTA_NDKDYNAMIN_PATHWAY	-0.0124587	0.88125	0.962436	0.00572272	0.00588235	0.94377	0.9838	-0.0356399	0.669133	0.849884
PID_HNF3A_PATHWAY	-0.00623841	0.88891	0.962436	0.00103628	-0.022723	0.610902	0.855129	-0.0302482	0.498228	0.768929
REACTOME_REVERSIBLE_HYDRATION_OF_CARBON_DIOXIDE	-0.0125403	0.880477	0.962436	0.00372247	0.00877247	0.916228	0.972236	-0.00984718	0.90601	0.966461
REACTOME_THROMBOXANE_SIGNALLING_THROUGH_TP_RECEPTOR	-0.0105992	0.876353	0.962436	0.00372889	-0.0338212	0.619549	0.855997	0.0408761	0.54847	0.793756
REACTOME_DESTABILIZATION_OF_MRNA_BY_BRF1	-0.0102988	0.883184	0.962436	0.00298068	-0.0104627	0.881338	0.96105	0.0402847	0.565463	0.801753
REACTOME_SHC_MEDIATED_CASCADE	-0.0072559	0.894378	0.962944	0.00220974	-0.00917415	0.866688	0.954282	-0.0257439	0.637601	0.839203
PID_P53_DOWNSTREAM_PATHWAY	-0.00327721	0.896687	0.964084	0.00033397	-0.00589092	0.815447	0.934656	-0.012297	0.626103	0.835195
KEGG_HISTIDINE_METABOLISM	-0.00687963	0.898068	0.96448	0.00313184	0.00565961	0.916071	0.972236	-0.0435831	0.417056	0.719096
REACTOME_DIABETES_PATHWAYS	-0.00313498	0.903729	0.967308	0.000376121	-0.00890416	0.731198	0.90593	0.000277245	0.991466	0.995369
KEGG_PROTEIN_EXPORT	-0.00736122	0.904929	0.967782	0.00381045	0.00693809	0.91037	0.971268	-0.00401102	0.948111	0.990042
PID_P53_REGULATION_PATHWAY	-0.00460627	0.90697	0.968352	0.00120847	-0.00579417	0.883133	0.962186	-0.0184318	0.64006	0.839584
REACTOME_SIGNALING_BY_GPCR	-0.00120721	0.907086	0.968352	0.000717659	-0.00816451	0.429929	0.769536	0.0304114	0.00328192	0.0692514
REACTOME_ABC_FAMILY_PROTEINS_MEDIATED_TRANSPORT	-0.00592626	0.907735	0.968352	0.00216703	-0.00163544	0.974485	0.993381	-0.027241	0.594218	0.821008
KEGG_SULFUR_METABOLISM	-0.00889241	0.911639	0.969722	0.00820453	-0.00464329	0.953792	0.989011	-0.033322	0.677531	0.852852
BIOCARTA_ERK5_PATHWAY	-0.0079277	0.909947	0.969722	0.00353	-0.0207054	0.767683	0.916636	0.00375538	0.957271	0.992866
REACTOME_PHOSPHOLIPID_METABOLISM	-0.00228249	0.913572	0.969722	0.000461107	0.000410079	0.984443	0.996134	-0.00844364	0.688055	0.860913
BIOCARTA_CXCR4_PATHWAY	-0.00602902	0.91863	0.973474	0.0030597	-0.0175554	0.766108	0.916636	0.0127875	0.828459	0.926557
KEGG_SNARE_INTERACTIONS_IN_VESICULAR_TRANSPORT	-0.00424359	0.929875	0.975166	0.00069371	-0.0032025	0.94705	0.985611	0.00271494	0.955102	0.992866
BIOCARTA_RNA_PATHWAY	-0.00745501	0.934956	0.975166	0.00260836	-0.00929919	0.918916	0.97297	-0.00131127	0.988547	0.995369
BIOCARTA_ETC_PATHWAY	-0.00756834	0.930759	0.975166	0.0049138	0.0118914	0.891409	0.964733	-0.0423013	0.627217	0.835195
BIOCARTA_IL2_PATHWAY	-0.00590123	0.92372	0.975166	0.00169736	-0.0356051	0.563466	0.837276	-0.0223033	0.717445	0.873467
PID_ARF6_PATHWAY	-0.00463511	0.926662	0.975166	0.00155689	-0.00729931	0.884749	0.962924	-0.0123212	0.806706	0.916355
PID_CIRCADIAN_PATHWAY	-0.00673689	0.928052	0.975166	0.00468073	-0.0186466	0.802645	0.930836	-0.0177682	0.811763	0.919998
PID_TCR_RAS_PATHWAY	-0.00635115	0.934452	0.975166	0.00424674	-0.0183081	0.812593	0.934656	-0.0382628	0.620256	0.835086
PID_FOXO_PATHWAY	-0.00357924	0.932458	0.975166	0.00167898	-0.00141538	0.973264	0.993381	-0.0154814	0.713931	0.871065
REACTOME_GRB2_EVENTS_IN_ERBB2_SIGNALING	-0.00586223	0.924223	0.975166	0.00204796	-0.0350809	0.569224	0.837276	-0.00850181	0.890285	0.960333
REACTOME_REGULATORY_RNA_PATHWAYS	-0.00598563	0.936057	0.975166	0.00512044	0.0395775	0.595788	0.84508	-0.0412303	0.580523	0.81208
REACTOME_MRNA_DECAY_BY_5_TO_3_EXORIBONUCLEASE	-0.00882605	0.923029	0.975166	0.00329645	-0.0177162	0.846222	0.948215	-0.0867892	0.342068	0.658671
PID_BMP_PATHWAY	-0.00327721	0.941504	0.977451	0.00146807	-0.000872723	0.98441	0.996134	-0.0133841	0.764421	0.890893
REACTOME_REGULATED_PROTEOLYSIS_OF_P75NTR	-0.00554535	0.951594	0.984241	0.00389963	-0.0198603	0.827887	0.938954	-0.0320466	0.725726	0.876232
KEGG_PEROXISOME	-0.00185929	0.955434	0.984807	0.00322516	0.0077995	0.814653	0.934656	-0.0183404	0.58146	0.81208
ST_GRANULE_CELL_SURVIVAL_PATHWAY	-0.002885	0.958655	0.984807	0.000755475	-0.00784167	0.887943	0.96332	-0.0111684	0.840943	0.934023
REACTOME_ABACAVIR_TRANSPORT_AND_METABOLISM	-0.00523932	0.954262	0.984807	0.00582316	-0.0038961	0.96598	0.99318	0.0292279	0.748998	0.885528
REACTOME_NEGATIVE_REGULATORS_OF_RIG_I_MDA5_SIGNALING	-0.00316651	0.958107	0.984807	0.00216275	0.0024943	0.966995	0.993381	0.00133685	0.982307	0.9951
BIOCARTA_IL6_PATHWAY	-0.00287539	0.962789	0.985647	0.00185357	-0.0284328	0.644563	0.86863	-0.0268108	0.663555	0.847969
REACTOME_CDC6_ASSOCIATION_WITH_THE_ORC_ORIGIN_COMPLEX	-0.00382869	0.964939	0.985647	0.00655788	0.00246739	0.977401	0.994521	-0.0351146	0.686845	0.860244
KEGG_GLYCOSPHINGOLIPID_BIOSYNTHESIS_GLOBO_SERIES	-0.00253396	0.974773	0.986222	0.00291741	0.00579351	0.942364	0.983333	-0.0161117	0.84065	0.934023
KEGG_RIBOSOME	-0.00131282	0.97343	0.986222	0.00206367	0.000359046	0.992799	0.996772	0.0338644	0.394658	0.699845
REACTOME_ADVANCED_GLYCOSYLATION_ENDPRODUCT_RECEPTOR_SIGNALING	-0.00276004	0.972524	0.986222	0.00235351	0.00553895	0.944892	0.984167	0.018507	0.81735	0.923049
REACTOME_SOS_MEDIATED_SIGNALLING	-0.00248447	0.974334	0.986222	0.0021005	-0.0359682	0.641378	0.86863	-0.00146255	0.984889	0.9951
BIOCARTA_PITX2_PATHWAY	-0.00213947	0.977123	0.987165	0.00314845	-0.00375547	0.959855	0.991669	0.0117597	0.874758	0.953223
REACTOME_SEMA4D_IN_SEMAPHORIN_SIGNALING	-0.00135391	0.980952	0.989469	0.0019788	0.00185084	0.973963	0.993381	0.035609	0.530043	0.78409
REACTOME_SMOOTH_MUSCLE_CONTRACTION	-0.00139095	0.984167	0.991147	0.00255738	-0.00169871	0.980665	0.994782	0.0232358	0.740261	0.882073
KEGG_FC_GAMMA_R_MEDIATED_PHAGOCYTOSIS	-0.000550266	0.985574	0.991782	0.000476944	-0.00790281	0.795112	0.925459	0.024034	0.429686	0.724629
REACTOME_PKB_MEDIATED_EVENTS	-0.000657237	0.990405	0.994295	0.00161003	-0.0027847	0.959362	0.991669	0.0304155	0.577845	0.810509
REACTOME_ASPARAGINE_N_LINKED_GLYCOSYLATION	-0.000168776	0.995874	0.99795	0.0010873	-0.00958869	0.768923	0.916636	-0.0441473	0.176181	0.505706
REACTOME_GLUCAGON_SIGNALING_IN_METABOLIC_REGULATION	-0.000168102	0.99759	0.998371	0.00252893	-0.00416297	0.94037	0.983333	0.0191416	0.730877	0.879121
KEGG_PPAR_SIGNALING_PATHWAY	-2.68053e-05	0.999387	0.999387	0.00177182	0.0147691	0.672181	0.881074	-0.0248234	0.476944	0.758234

## Sheet: ELL (PC2) Positive Correlations
	realstat	realp	realpadj	SubtreeVar	nomarinestat	nomarinep	nomarinepadj	nobnmrstat	nobnmrp	nobnmrpadj
REACTOME_NEURONAL_SYSTEM	0.102953	1.27331e-08	1.62729e-05	0.00108544	0.09384	2.14941e-07	0.000274694	0.109057	1.6716e-09	2.13129e-06
REACTOME_VOLTAGE_GATED_POTASSIUM_CHANNELS	0.205927	3.08385e-06	0.00197058	0.00379626	0.200407	5.62301e-06	0.0023954	0.191385	1.45294e-05	0.0030875
REACTOME_TRANSMISSION_ACROSS_CHEMICAL_SYNAPSES	0.100659	6.05528e-06	0.00257955	0.00108297	0.0884012	7.08409e-05	0.0129335	0.107411	1.37983e-06	0.000879642
REACTOME_POTASSIUM_CHANNELS	0.13145	1.26551e-05	0.0040433	0.00173219	0.125249	3.18231e-05	0.00813397	0.138477	4.23798e-06	0.00180114
REACTOME_G0_AND_EARLY_G1	0.260373	2.39354e-05	0.00611789	0.00339463	0.261885	2.14595e-05	0.0068563	0.252287	4.25077e-05	0.00416902
REACTOME_ASSOCIATION_OF_TRIC_CCT_WITH_TARGET_PROTEINS_DURING_BIOSYNTHESIS	0.225009	7.25117e-05	0.0115838	0.00340097	0.219697	0.00010697	0.0166171	0.191543	0.000730887	0.0291213
KEGG_PATHWAYS_IN_CANCER	0.0612741	0.000197831	0.01448	0.000386627	0.0612865	0.000197291	0.0229216	0.0631007	0.00012678	0.0101027
REACTOME_NGF_SIGNALLING_VIA_TRKA_FROM_THE_PLASMA_MEMBRANE	0.0984672	0.000163772	0.01448	0.00130741	0.0894101	0.000620519	0.0335838	0.102206	9.14325e-05	0.00832689
REACTOME_G1_PHASE	0.201841	0.000132162	0.01448	0.00341843	0.191882	0.000279292	0.0274566	0.217248	3.8858e-05	0.00412866
REACTOME_MRNA_PROCESSING	0.0967446	0.000168842	0.01448	0.00109328	0.094564	0.000249658	0.0265885	0.0774527	0.00259996	0.061388
REACTOME_PROTEIN_FOLDING	0.150132	0.000213703	0.01448	0.00172005	0.140405	0.000535481	0.0335838	0.132213	0.00111272	0.0394089
REACTOME_LATE_PHASE_OF_HIV_LIFE_CYCLE	0.116852	0.000188584	0.01448	0.00211898	0.118242	0.000157951	0.0201861	0.100631	0.00130224	0.0448744
REACTOME_NEUROTRANSMITTER_RECEPTOR_BINDING_AND_DOWNSTREAM_TRANSMISSION_IN_THE_POSTSYNAPTIC_CELL	0.0945115	0.000297139	0.018083	0.00145328	0.0829699	0.0014934	0.0515829	0.111924	1.83339e-05	0.00333938
REACTOME_ERK_MAPK_TARGETS	0.228576	0.000405416	0.023551	0.00443639	0.221081	0.000624912	0.0335838	0.212988	0.000982995	0.0358091
REACTOME_REGULATION_OF_BETA_CELL_DEVELOPMENT	0.188322	0.000453767	0.0243128	0.00251151	0.182875	0.00066108	0.0335838	0.185148	0.000565691	0.0240419
REACTOME_MITOTIC_G1_G1_S_PHASES	0.0924034	0.000474617	0.0243128	0.00115027	0.0873955	0.000995541	0.0397594	0.0981524	0.00020556	0.0126477
REACTOME_GABA_RECEPTOR_ACTIVATION	0.146063	0.00054295	0.0266881	0.00219505	0.140325	0.000891421	0.0367496	0.179594	2.11331e-05	0.00336808
REACTOME_CLASS_B_2_SECRETIN_FAMILY_RECEPTORS	0.10919	0.00065506	0.0298988	0.000918271	0.109117	0.000660575	0.0335838	0.120118	0.000177711	0.0119253
BIOCARTA_CELLCYCLE_PATHWAY	0.204054	0.000711742	0.0313657	0.00413408	0.201991	0.000805814	0.0367496	0.207094	0.000591572	0.0243308
KEGG_FOCAL_ADHESION	0.070198	0.000818702	0.0326969	0.000534247	0.0697059	0.000890873	0.0367496	0.0938822	7.62769e-06	0.00243133
REACTOME_HIV_LIFE_CYCLE	0.0966722	0.00092762	0.0348676	0.00190957	0.0991427	0.000683239	0.0335838	0.0810398	0.00574136	0.0926612
REACTOME_HIV_INFECTION	0.0735491	0.00111996	0.0397585	0.000520701	0.0732816	0.00120749	0.0453873	0.0668491	0.00314752	0.0691912
KEGG_BIOSYNTHESIS_OF_UNSATURATED_FATTY_ACIDS	0.203791	0.00123478	0.0415275	0.00664063	0.214677	0.000665761	0.0335838	0.181948	0.00392115	0.0746188
REACTOME_ADHERENS_JUNCTIONS_INTERACTIONS	0.17922	0.00127998	0.041944	0.00173949	0.180349	0.00119228	0.0453873	0.192101	0.000556681	0.0240419
REACTOME_PROCESSING_OF_CAPPED_INTRON_CONTAINING_PRE_MRNA	0.0889352	0.0014714	0.0443564	0.00126905	0.0866297	0.002045	0.0582106	0.0686646	0.0140735	0.151499
REACTOME_TRANSPORT_OF_MATURE_MRNA_DERIVED_FROM_AN_INTRONLESS_TRANSCRIPT	0.16241	0.00149243	0.0443564	0.00321504	0.163433	0.00139277	0.0494433	0.130868	0.0104887	0.132448
SA_REG_CASCADE_OF_CYCLIN_EXPR	0.259132	0.00188923	0.0493845	0.00617562	0.262469	0.00164884	0.05336	0.263382	0.00158821	0.0482135
REACTOME_CYCLIN_E_ASSOCIATED_EVENTS_DURING_G1_S_TRANSITION_	0.120254	0.00189346	0.0493845	0.00176211	0.119033	0.00230739	0.0595505	0.121415	0.00171014	0.0507076
REACTOME_LIGAND_GATED_ION_CHANNEL_TRANSPORT	0.189741	0.00262984	0.0606994	0.00437535	0.190345	0.00254819	0.0626267	0.192606	0.00226257	0.0554765
KEGG_NEUROACTIVE_LIGAND_RECEPTOR_INTERACTION	0.0536746	0.00275883	0.0618559	0.000506416	0.0451783	0.0117509	0.145204	0.0651512	0.000279729	0.0148606
REACTOME_NUCLEAR_EVENTS_KINASE_AND_TRANSCRIPTION_FACTOR_ACTIVATION	0.179425	0.00291599	0.0631633	0.00368981	0.174689	0.00375679	0.0800195	0.185112	0.0021349	0.0550247
REACTOME_GLUCOSE_METABOLISM	0.112703	0.00305093	0.0649848	0.00211602	0.104955	0.00579987	0.0996735	0.0890635	0.0192241	0.173835
REACTOME_REGULATION_OF_GLUCOKINASE_BY_GLUCOKINASE_REGULATORY_PROTEIN	0.163632	0.00327867	0.0686908	0.0046022	0.162256	0.00355007	0.0795963	0.132309	0.0174318	0.165863
REACTOME_PYRUVATE_METABOLISM_AND_CITRIC_ACID_TCA_CYCLE	0.133223	0.00359767	0.0741583	0.00303201	0.143836	0.00167011	0.05336	0.116996	0.0105637	0.132448
BIOCARTA_AGR_PATHWAY	0.141745	0.00374941	0.0744402	0.00178199	0.135892	0.00545556	0.0968362	0.157618	0.00148855	0.0482135
REACTOME_METABOLISM_OF_AMINO_ACIDS_AND_DERIVATIVES	0.0610842	0.00367722	0.0744402	0.000940725	0.0642687	0.00230172	0.0595505	0.0426703	0.0424607	0.262803
REACTOME_GABA_A_RECEPTOR_ACTIVATION	0.24148	0.00378608	0.0744402	0.00984084	0.24185	0.00373285	0.0800195	0.241705	0.00375362	0.0736287
REACTOME_GLUCOSE_TRANSPORT	0.135494	0.00389622	0.075445	0.00284099	0.134636	0.00412845	0.0831314	0.0955582	0.0417817	0.261135
REACTOME_MEMBRANE_TRAFFICKING	0.0781055	0.00412462	0.0775186	0.000395463	0.0698042	0.0103597	0.139366	0.0805556	0.00309212	0.0691659
REACTOME_CELL_CELL_COMMUNICATION	0.0757508	0.00465953	0.0863025	0.000759452	0.0696548	0.0092697	0.128112	0.102998	0.000119348	0.0101027
PID_VEGF_VEGFR_PATHWAY	0.257192	0.00487014	0.0886865	0.00549085	0.251458	0.00591007	0.0996735	0.234865	0.010138	0.131897
REACTOME_TRIGLYCERIDE_BIOSYNTHESIS	0.131566	0.00506649	0.0886865	0.00386218	0.131301	0.00515606	0.0928092	0.0949595	0.0430799	0.263152
REACTOME_RNA_POL_II_TRANSCRIPTION_PRE_INITIATION_AND_PROMOTER_OPENING	0.13884	0.00513521	0.0886865	0.00332492	0.14429	0.00363427	0.0800195	0.135755	0.00621474	0.0963297
REACTOME_SIGNALING_BY_PDGF	0.0763881	0.00502546	0.0886865	0.000589452	0.0656806	0.015859	0.164779	0.084077	0.00201676	0.05471
REACTOME_TRANSPORT_OF_RIBONUCLEOPROTEINS_INTO_THE_HOST_NUCLEUS	0.154422	0.00552284	0.0928709	0.00472183	0.152425	0.00616371	0.102302	0.126487	0.0230348	0.194499
REACTOME_DSCAM_INTERACTIONS	0.240451	0.0057706	0.095777	0.00471435	0.216211	0.0130554	0.148972	0.326561	0.000177441	0.0119253
REACTOME_PREFOLDIN_MEDIATED_TRANSFER_OF_SUBSTRATE_TO_CCT_TRIC	0.152996	0.00597395	0.0978808	0.00268291	0.142239	0.0105909	0.140992	0.140109	0.0118145	0.143462
REACTOME_MRNA_CAPPING	0.161021	0.00636355	0.101906	0.00465191	0.174506	0.00310716	0.0721991	0.12433	0.035142	0.240076
REACTOME_RNA_POL_II_PRE_TRANSCRIPTION_EVENTS	0.115192	0.00637911	0.101906	0.00281948	0.122041	0.00385492	0.0807638	0.104297	0.0135255	0.151499
PID_E2F_PATHWAY	0.0921252	0.00664167	0.102621	0.000984634	0.0951944	0.00503614	0.0928092	0.0748941	0.0273418	0.212002
KEGG_TGF_BETA_SIGNALING_PATHWAY	0.0862063	0.00749207	0.103053	0.00065762	0.0813394	0.0116306	0.145204	0.0721304	0.0252542	0.206405
KEGG_MATURITY_ONSET_DIABETES_OF_THE_YOUNG	0.159299	0.0069494	0.103053	0.0022894	0.14366	0.0149223	0.160639	0.130146	0.0274356	0.212002
BIOCARTA_NO1_PATHWAY	0.151204	0.00766706	0.103053	0.00210458	0.156046	0.00592738	0.0996735	0.132692	0.0217537	0.188457
REACTOME_DEVELOPMENTAL_BIOLOGY	0.0409456	0.00760359	0.103053	0.000444443	0.0327805	0.0326086	0.254108	0.0380526	0.0131189	0.150909
REACTOME_TCA_CYCLE_AND_RESPIRATORY_ELECTRON_TRANSPORT	0.0731887	0.00798301	0.103053	0.00306753	0.0749572	0.00659023	0.107523	0.0523566	0.0577364	0.302555
REACTOME_VEGF_LIGAND_RECEPTOR_INTERACTIONS	0.246579	0.00694822	0.103053	0.00570949	0.24222	0.0080111	0.11768	0.228885	0.0122237	0.145656
REACTOME_TRANSMEMBRANE_TRANSPORT_OF_SMALL_MOLECULES	0.0394557	0.00782805	0.103053	0.000909004	0.0424421	0.00422812	0.0831314	0.0297657	0.0448334	0.264213
REACTOME_STRIATED_MUSCLE_CONTRACTION	0.148321	0.00769423	0.103053	0.00487873	0.133927	0.0161041	0.165976	0.195539	0.000441954	0.0216728
REACTOME_REGULATION_OF_INSULIN_SECRETION_BY_ACETYLCHOLINE	0.245097	0.0072943	0.103053	0.00176468	0.222666	0.0147875	0.160639	0.249473	0.00631425	0.0963297
REACTOME_INWARDLY_RECTIFYING_K_CHANNELS	0.151086	0.00771463	0.103053	0.00217386	0.136882	0.0157864	0.164779	0.188426	0.000891325	0.0344376
REACTOME_MAPK_TARGETS_NUCLEAR_EVENTS_MEDIATED_BY_MAP_KINASES	0.14223	0.00808758	0.103359	0.00324701	0.135113	0.011874	0.145204	0.132338	0.0137322	0.151499
REACTOME_CITRIC_ACID_CYCLE_TCA_CYCLE	0.175316	0.00819384	0.103563	0.00394342	0.183726	0.00559169	0.0978929	0.138895	0.0361979	0.242907
REACTOME_HORMONE_SENSITIVE_LIPASE_HSL_MEDIATED_TRIACYLGLYCEROL_HYDROLYSIS	0.241254	0.00826563	0.103563	0.00456458	0.243923	0.0075796	0.113392	0.173529	0.0574804	0.302555
KEGG_MELANOMA	0.0912355	0.00846954	0.105088	0.000644306	0.0870614	0.0119949	0.145204	0.0849612	0.0142188	0.151499
PID_WNT_SIGNALING_PATHWAY	0.143567	0.00861523	0.105868	0.00236281	0.153005	0.00511589	0.0928092	0.133904	0.0142797	0.151499
KEGG_AXON_GUIDANCE	0.0680423	0.00919889	0.108853	0.000460387	0.0634389	0.0151679	0.161538	0.0755695	0.0038197	0.0737896
REACTOME_NEP_NS2_INTERACTS_WITH_THE_CELLULAR_EXPORT_MACHINERY	0.147798	0.00915189	0.108853	0.00470986	0.147439	0.00932272	0.128112	0.114459	0.0435491	0.263152
KEGG_SMALL_CELL_LUNG_CANCER	0.0821759	0.00944769	0.110717	0.00105555	0.0787631	0.0128604	0.148068	0.0931224	0.0032702	0.0692514
PID_ANGIOPOIETIN_RECEPTOR_PATHWAY	0.10604	0.00961624	0.110717	0.000951995	0.103019	0.0118846	0.145204	0.122283	0.00282696	0.0643638
BIOCARTA_AT1R_PATHWAY	0.138553	0.00988207	0.11143	0.0019181	0.11734	0.028894	0.233321	0.114213	0.0334445	0.231848
REACTOME_FORMATION_OF_RNA_POL_II_ELONGATION_COMPLEX_	0.13182	0.00993976	0.11143	0.00360511	0.145124	0.00453832	0.0865667	0.0914306	0.0737687	0.348152
KEGG_PANCREATIC_CANCER	0.0892922	0.0105166	0.116726	0.00111548	0.084931	0.0149578	0.160639	0.0993177	0.00443282	0.0807407
PID_S1P_S1P2_PATHWAY	0.154066	0.0105949	0.116726	0.0037417	0.132006	0.0285368	0.233321	0.187492	0.00186911	0.0529581
REACTOME_METABOLISM_OF_CARBOHYDRATES	0.0496021	0.0106954	0.116826	0.000310935	0.0448826	0.0209099	0.199835	0.0327568	0.091869	0.39572
PID_AVB3_INTEGRIN_PATHWAY	0.0854461	0.0112596	0.121006	0.000914093	0.0842066	0.012498	0.145204	0.104204	0.00199535	0.05471
REACTOME_FORMATION_OF_TUBULIN_FOLDING_INTERMEDIATES_BY_CCT_TRIC	0.159861	0.0112674	0.121006	0.0042079	0.154731	0.0141681	0.158831	0.148628	0.0184624	0.170056
KEGG_RNA_DEGRADATION	0.100671	0.0121898	0.124628	0.00162439	0.0926156	0.0211094	0.199835	0.0716357	0.0744812	0.348152
KEGG_ALDOSTERONE_REGULATED_SODIUM_REABSORPTION	0.114716	0.0121761	0.124628	0.00106605	0.107507	0.018801	0.189194	0.0868358	0.0577359	0.302555
REACTOME_SIGNALLING_BY_NGF	0.052046	0.0117956	0.124628	0.000859935	0.0419148	0.0425611	0.300514	0.0555609	0.00718324	0.102271
REACTOME_FORMATION_OF_THE_HIV1_EARLY_ELONGATION_COMPLEX	0.15155	0.0119355	0.124628	0.00444128	0.161591	0.00734891	0.113156	0.109774	0.0686043	0.333857
REACTOME_REGULATION_OF_GENE_EXPRESSION_IN_BETA_CELLS	0.164506	0.0131034	0.131859	0.00274381	0.164295	0.0132207	0.149523	0.172246	0.00938597	0.125337
BIOCARTA_ARF_PATHWAY	0.172334	0.0139438	0.137078	0.00389574	0.159624	0.0227637	0.206326	0.10944	0.118431	0.435522
REACTOME_HOST_INTERACTIONS_OF_HIV_FACTORS	0.0693325	0.0144828	0.14129	0.000530526	0.0683994	0.0163604	0.167268	0.064033	0.0246071	0.202413
KEGG_PURINE_METABOLISM	0.0580285	0.0153887	0.148991	0.000371704	0.0599174	0.0123511	0.145204	0.0534383	0.0256544	0.20834
REACTOME_RNA_POL_II_TRANSCRIPTION	0.0789889	0.0155156	0.149089	0.00182102	0.076139	0.0204428	0.197923	0.0724801	0.0263724	0.211477
REACTOME_ION_CHANNEL_TRANSPORT	0.0954936	0.0163819	0.155082	0.00150418	0.0931021	0.0192746	0.192445	0.0966467	0.0151293	0.151499
REACTOME_RNA_POL_I_TRANSCRIPTION_TERMINATION	0.153616	0.0174661	0.15944	0.00386403	0.144756	0.0251126	0.215396	0.121423	0.0602905	0.308043
REACTOME_TRANSPORT_OF_MATURE_TRANSCRIPT_TO_CYTOPLASM	0.097592	0.0195339	0.173363	0.00164503	0.0888288	0.035434	0.269552	0.0746532	0.0740512	0.348152
REACTOME_CYCLIN_A_B1_ASSOCIATED_EVENTS_DURING_G2_M_TRANSITION	0.173428	0.0200985	0.177144	0.00385186	0.180373	0.0156239	0.164779	0.18551	0.0129029	0.150909
REACTOME_AMINO_ACID_AND_OLIGOPEPTIDE_SLC_TRANSPORTERS	0.0958732	0.0204664	0.177933	0.00237808	0.096447	0.0197244	0.19382	0.0796863	0.0540582	0.293295
PID_RB_1PATHWAY	0.0845264	0.020614	0.178005	0.00103608	0.0833495	0.0224456	0.206326	0.0558258	0.126281	0.446008
BIOCARTA_G1_PATHWAY	0.12629	0.020842	0.178766	0.00291149	0.127715	0.019445	0.192641	0.133146	0.0148398	0.151499
KEGG_VALINE_LEUCINE_AND_ISOLEUCINE_BIOSYNTHESIS	0.200683	0.0212235	0.180824	0.00329019	0.212702	0.0146074	0.160639	0.174637	0.0449681	0.264213
KEGG_MTOR_SIGNALING_PATHWAY	0.0931638	0.0215955	0.182775	0.00153086	0.0884695	0.029136	0.233321	0.0984945	0.0151467	0.151499
PID_S1P_S1P3_PATHWAY	0.124704	0.0225005	0.186725	0.00303735	0.123176	0.0242063	0.212982	0.155192	0.00451617	0.0811002
REACTOME_HS_GAG_BIOSYNTHESIS	0.119287	0.0238827	0.196916	0.00154072	0.116081	0.0279273	0.231761	0.112305	0.0334366	0.231848
PID_IL2_1PATHWAY	0.0885994	0.0245903	0.201452	0.000800249	0.0716834	0.0689707	0.385186	0.0685774	0.0818924	0.366361
REACTOME_CLASS_I_MHC_MEDIATED_ANTIGEN_PROCESSING_PRESENTATION	0.0447228	0.0249975	0.202195	0.000708764	0.0361779	0.0717326	0.385186	0.0421148	0.0352112	0.240076
PID_SMAD2_3NUCLEAR_PATHWAY	0.0720073	0.0264193	0.205877	0.00121416	0.0743419	0.0219081	0.204369	0.0469793	0.147514	0.474061
REACTOME_NEUROTRANSMITTER_RELEASE_CYCLE	0.112005	0.0261325	0.205877	0.00225804	0.090829	0.0712765	0.385186	0.0790981	0.11624	0.435522
REACTOME_INTEGRATION_OF_ENERGY_METABOLISM	0.062719	0.0262698	0.205877	0.000838655	0.0515043	0.0680246	0.385186	0.0694725	0.013837	0.151499
REACTOME_SIGNAL_ATTENUATION	0.185605	0.0260487	0.205877	0.00513594	0.156556	0.0604932	0.366399	0.15541	0.0624013	0.313235
KEGG_WNT_SIGNALING_PATHWAY	0.0541894	0.0276739	0.214347	0.000595647	0.0501752	0.0414746	0.297778	0.0593631	0.0158619	0.155568
REACTOME_P53_DEPENDENT_G1_DNA_DAMAGE_RESPONSE	0.0908252	0.0297602	0.22639	0.00243456	0.092419	0.0286423	0.233321	0.0865858	0.0382823	0.250307
REACTOME_TRANSPORT_OF_INORGANIC_CATIONS_ANIONS_AND_AMINO_ACIDS_OLIGOPEPTIDES	0.0654768	0.0305287	0.229504	0.00152865	0.0696284	0.0214307	0.201386	0.053375	0.0778428	0.357013
KEGG_ECM_RECEPTOR_INTERACTION	0.0686774	0.031063	0.229561	0.00132316	0.0796195	0.0124262	0.145204	0.0914833	0.00407515	0.0764091
REACTOME_SCFSKP2_MEDIATED_DEGRADATION_OF_P27_P21	0.0910561	0.0310752	0.229561	0.00243826	0.0895595	0.0358951	0.271443	0.104572	0.0132813	0.151193
KEGG_SPLICEOSOME	0.0639574	0.0318139	0.230408	0.00216131	0.0581603	0.0521407	0.338253	0.0785641	0.00836425	0.114671
REACTOME_MRNA_SPLICING	0.0700563	0.0318386	0.230408	0.00257878	0.0655693	0.0458995	0.313656	0.0540756	0.097561	0.406504
REACTOME_G1_S_TRANSITION	0.0625663	0.0320912	0.230408	0.00101558	0.0585047	0.0461404	0.313656	0.0610284	0.0365658	0.244091
REACTOME_GROWTH_HORMONE_RECEPTOR_SIGNALING	0.12548	0.0334854	0.236789	0.00379881	0.111546	0.058745	0.364447	0.10897	0.0648276	0.321616
REACTOME_TRANSCRIPTION	0.0495819	0.0341864	0.238745	0.00075585	0.0462476	0.0496595	0.326935	0.047628	0.0432315	0.263152
REACTOME_MUSCLE_CONTRACTION	0.0967809	0.0344262	0.239113	0.00357466	0.0878259	0.0549418	0.34589	0.140895	0.00207629	0.0550247
KEGG_GLIOMA	0.0768856	0.0367015	0.249492	0.000943217	0.0632035	0.0859234	0.393991	0.0579774	0.115186	0.435522
SA_PTEN_PATHWAY	0.146165	0.0370368	0.250423	0.0040557	0.115544	0.099253	0.410974	0.175709	0.0121807	0.145656
REACTOME_ERKS_ARE_INACTIVATED	0.181162	0.0375384	0.251173	0.00356648	0.174572	0.045048	0.309523	0.152475	0.0800286	0.361831
REACTOME_ENDOSOMAL_SORTING_COMPLEX_REQUIRED_FOR_TRANSPORT_ESCRT	0.127754	0.0381872	0.254184	0.00213497	0.112047	0.0690668	0.385186	0.125909	0.0410621	0.258832
KEGG_CITRATE_CYCLE_TCA_CYCLE	0.109204	0.0386342	0.255826	0.0030198	0.120257	0.0227631	0.206326	0.102183	0.0529783	0.289903
KEGG_CYSTEINE_AND_METHIONINE_METABOLISM	0.103858	0.0391644	0.256819	0.00116454	0.106318	0.0347477	0.265914	0.0801855	0.111306	0.428748
REACTOME_LIPID_DIGESTION_MOBILIZATION_AND_TRANSPORT	0.0921013	0.039186	0.256819	0.00356503	0.0995812	0.0257671	0.219536	0.0646706	0.14761	0.474061
REACTOME_GABA_B_RECEPTOR_ACTIVATION	0.103617	0.0396233	0.257049	0.0013481	0.0947272	0.0599552	0.36487	0.147648	0.00336752	0.0692514
REACTOME_G1_S_SPECIFIC_TRANSCRIPTION	0.144277	0.03955	0.257049	0.00252694	0.144354	0.039445	0.284806	0.110053	0.116382	0.435522
BIOCARTA_NOS1_PATHWAY	0.143945	0.0400059	0.25822	0.00319034	0.125693	0.0729278	0.387524	0.0607607	0.386007	0.689369
REACTOME_GLYCOLYSIS	0.118136	0.0410604	0.262376	0.00279378	0.101723	0.0785614	0.390458	0.0861019	0.136499	0.459969
REACTOME_PLATELET_SENSITIZATION_BY_LDL	0.157904	0.0408754	0.262376	0.00428767	0.133883	0.0829671	0.393991	0.231092	0.00276664	0.0641357
REACTOME_METABOLISM_OF_NON_CODING_RNA	0.0919295	0.0419665	0.265511	0.00264005	0.0943738	0.0368044	0.273033	0.0550708	0.223077	0.555606
PID_NECTIN_PATHWAY	0.110986	0.0422765	0.266154	0.00268185	0.117861	0.031038	0.243353	0.133343	0.0146923	0.151499
PID_INTEGRIN1_PATHWAY	0.0720729	0.0433847	0.270467	0.00168033	0.0807277	0.0236636	0.210656	0.109241	0.00220099	0.0550247
PID_TCPTP_PATHWAY	0.0899536	0.043995	0.27294	0.000919066	0.0874422	0.0502417	0.327596	0.0717039	0.108382	0.428748
KEGG_MELANOGENESIS	0.0596339	0.0442194	0.273007	0.000651695	0.0548384	0.0642848	0.377987	0.0656854	0.0266803	0.212002
BIOCARTA_SARS_PATHWAY	0.180634	0.0479946	0.286565	0.00397421	0.180642	0.0479849	0.322762	0.149571	0.101554	0.416339
SA_G1_AND_S_PHASES	0.165014	0.0478622	0.286565	0.00456202	0.173989	0.0369599	0.273033	0.142631	0.0872272	0.382008
REACTOME_INTERACTIONS_OF_VPR_WITH_HOST_CELLULAR_PROTEINS	0.10103	0.0481793	0.286565	0.00311815	0.0984721	0.0541355	0.344205	0.0701422	0.176951	0.505706
REACTOME_SLC_MEDIATED_TRANSMEMBRANE_TRANSPORT	0.0369518	0.0512166	0.294734	0.00111776	0.0426799	0.0243313	0.212982	0.0178277	0.346904	0.660914
REACTOME_BRANCHED_CHAIN_AMINO_ACID_CATABOLISM	0.136717	0.0511098	0.294734	0.00629197	0.158593	0.0236566	0.210656	0.0379326	0.588377	0.817191
REACTOME_PLATELET_HOMEOSTASIS	0.0680516	0.0512014	0.294734	0.00169483	0.0574157	0.0999606	0.410974	0.0961028	0.00589641	0.0928139
BIOCARTA_MPR_PATHWAY	0.100155	0.0538624	0.304585	0.00125257	0.0956508	0.0655876	0.378768	0.0796847	0.131289	0.447822
BIOCARTA_CTCF_PATHWAY	0.118593	0.0543297	0.305874	0.00221029	0.114953	0.0621634	0.371007	0.0858716	0.163534	0.495264
REACTOME_CELL_CELL_JUNCTION_ORGANIZATION	0.0740688	0.0556993	0.309494	0.00101702	0.0748323	0.0532239	0.340101	0.0896951	0.0205017	0.180273
BIOCARTA_GH_PATHWAY	0.106209	0.0563285	0.311636	0.00185759	0.0762454	0.170667	0.528117	0.0756956	0.173772	0.505706
PID_ENDOTHELIN_PATHWAY	0.0700649	0.0589665	0.319871	0.0015857	0.0645925	0.0816939	0.393991	0.090451	0.0147731	0.151499
REACTOME_ALPHA_LINOLENIC_ACID_ALA_METABOLISM	0.164099	0.0595684	0.321217	0.011937	0.1767	0.0424957	0.300514	0.154982	0.0751902	0.349601
KEGG_BASAL_TRANSCRIPTION_FACTORS	0.0967584	0.0625251	0.324398	0.00223289	0.0884947	0.0884784	0.393991	0.0877793	0.0910841	0.393668
KEGG_TYPE_II_DIABETES_MELLITUS	0.0804606	0.0622556	0.324398	0.00129036	0.0692001	0.108817	0.429223	0.0287631	0.505086	0.771238
BIOCARTA_PTC1_PATHWAY	0.162063	0.0628019	0.324398	0.00371311	0.166173	0.0564199	0.35173	0.177813	0.0412101	0.258832
REACTOME_TRANSCRIPTIONAL_ACTIVITY_OF_SMAD2_SMAD3_SMAD4_HETEROTRIMER	0.0954224	0.0620254	0.324398	0.00152982	0.0923564	0.0708947	0.385186	0.0700571	0.170669	0.505706
REACTOME_FATTY_ACYL_COA_BIOSYNTHESIS	0.127476	0.061299	0.324398	0.00551643	0.121106	0.0754334	0.388462	0.0542471	0.425835	0.723753
REACTOME_DARPP_32_EVENTS	0.126673	0.0629505	0.324398	0.00245825	0.126932	0.062415	0.371007	0.072777	0.285361	0.611487
REACTOME_GABA_SYNTHESIS_RELEASE_REUPTAKE_AND_DEGRADATION	0.135528	0.0606588	0.324398	0.0031853	0.109222	0.130573	0.470063	0.0737751	0.307162	0.634736
REACTOME_INHIBITION_OF_VOLTAGE_GATED_CA2_CHANNELS_VIA_GBETA_GAMMA_SUBUNITS	0.120628	0.0619919	0.324398	0.00199804	0.102386	0.113167	0.441883	0.169276	0.00881772	0.119602
REACTOME_SMAD2_SMAD3_SMAD4_HETEROTRIMER_REGULATES_TRANSCRIPTION	0.111926	0.06335	0.325146	0.00171156	0.10893	0.0707578	0.385186	0.085086	0.158104	0.490015
BIOCARTA_DREAM_PATHWAY	0.147158	0.0662942	0.331099	0.00422839	0.132176	0.0990531	0.410974	0.0932894	0.244349	0.574731
PID_ERBB4_PATHWAY	0.0858682	0.0673598	0.331099	0.000905081	0.0759838	0.105513	0.422713	0.0392892	0.402602	0.707049
PID_LYMPH_ANGIOGENESIS_PATHWAY	0.106461	0.0656187	0.331099	0.00238087	0.100177	0.0832112	0.393991	0.147808	0.0105871	0.132448
REACTOME_PROCESSING_OF_INTRONLESS_PRE_MRNAS	0.153596	0.0655214	0.331099	0.00632211	0.153462	0.0657566	0.378768	0.144316	0.0835555	0.372494
REACTOME_NCAM1_INTERACTIONS	0.0848264	0.0671626	0.331099	0.0012947	0.070966	0.125654	0.46438	0.0749159	0.105942	0.424766
REACTOME_CLASS_C_3_METABOTROPIC_GLUTAMATE_PHEROMONE_RECEPTORS	0.141326	0.0672325	0.331099	0.00268396	0.109279	0.157033	0.51196	0.160706	0.0374276	0.247255
REACTOME_CELL_JUNCTION_ORGANIZATION	0.0605382	0.0670397	0.331099	0.00104861	0.0594266	0.0722131	0.386144	0.0805225	0.0148522	0.151499
REACTOME_ANTIGEN_PROCESSING_UBIQUITINATION_PROTEASOME_DEGRADATION	0.0402297	0.0652005	0.331099	0.00104774	0.0293776	0.181748	0.536467	0.0365647	0.0946641	0.399674
PID_S1P_S1P1_PATHWAY	0.117324	0.0694859	0.337654	0.00248463	0.136543	0.0346351	0.265914	0.146669	0.0232525	0.195046
PID_SHP2_PATHWAY	0.070015	0.0705035	0.340013	0.000743628	0.0661832	0.0873266	0.393991	0.0369775	0.339467	0.658671
KEGG_BASAL_CELL_CARCINOMA	0.0702162	0.0722243	0.347003	0.000997595	0.0667813	0.0873113	0.393991	0.0763827	0.0505157	0.281256
REACTOME_ACTIVATION_OF_RAC	0.143635	0.0730586	0.349696	0.00274595	0.121268	0.130195	0.470024	0.157859	0.0488423	0.278269
KEGG_ERBB_SIGNALING_PATHWAY	0.0556076	0.0739299	0.351178	0.000608011	0.0457545	0.141455	0.487619	0.045389	0.144663	0.472936
SIG_INSULIN_RECEPTOR_PATHWAY_IN_CARDIAC_MYOCYTES	0.0744527	0.07483	0.351591	0.00098305	0.0582097	0.163668	0.520035	0.0685048	0.101176	0.416128
ST_G_ALPHA_I_PATHWAY	0.0862405	0.0778143	0.35548	0.000809097	0.0665198	0.173753	0.528705	0.105721	0.0306287	0.228016
PID_WNT_NONCANONICAL_PATHWAY	0.0932875	0.077287	0.35548	0.00170847	0.0961762	0.0685535	0.385186	0.0763268	0.148332	0.47446
PID_RET_PATHWAY	0.0840354	0.0772922	0.35548	0.00173122	0.0634844	0.182012	0.536467	0.0907963	0.0562954	0.302555
REACTOME_ANTIGEN_PROCESSING_CROSS_PRESENTATION	0.0631852	0.0765789	0.35548	0.00133409	0.0640614	0.0747655	0.388462	0.0713995	0.0453812	0.265418
PID_VEGFR1_PATHWAY	0.0992367	0.0801227	0.358031	0.00172921	0.104332	0.0657953	0.378768	0.118426	0.0367652	0.244144
REACTOME_BASIGIN_INTERACTIONS	0.103311	0.0800214	0.358031	0.00344636	0.12275	0.0375304	0.274079	0.139859	0.0177952	0.168003
REACTOME_G_ALPHA_S_SIGNALLING_EVENTS	0.0478903	0.0799155	0.358031	0.00122171	0.0466257	0.0882085	0.393991	0.0593289	0.0300501	0.226709
REACTOME_RESPIRATORY_ELECTRON_TRANSPORT	0.0652244	0.0787511	0.358031	0.00571643	0.0632646	0.0881662	0.393991	0.035691	0.336067	0.658671
REACTOME_PYRUVATE_METABOLISM	0.118899	0.0809121	0.360299	0.00408305	0.137601	0.0433871	0.304663	0.0987897	0.146998	0.474061
BIOCARTA_CCR5_PATHWAY	0.134389	0.0818095	0.362198	0.0032043	0.125486	0.104165	0.419944	0.165846	0.0317423	0.228016
PID_SYNDECAN_1_PATHWAY	0.0742252	0.0820557	0.362198	0.00204616	0.0693961	0.104004	0.419944	0.0924261	0.0303672	0.227754
KEGG_NOTCH_SIGNALING_PATHWAY	0.071713	0.0894916	0.369059	0.00156276	0.0643705	0.127454	0.466951	0.0654236	0.121345	0.440781
KEGG_GAP_JUNCTION	0.0530025	0.0885068	0.369059	0.000773183	0.0450238	0.147922	0.498798	0.0568605	0.0676548	0.33287
KEGG_AMYOTROPHIC_LATERAL_SCLEROSIS_ALS	0.0690617	0.0885582	0.369059	0.00106195	0.0651893	0.107933	0.427053	0.0550452	0.174653	0.505706
KEGG_BLADDER_CANCER	0.0762595	0.0877261	0.369059	0.00111403	0.0780179	0.0806574	0.393991	0.0736285	0.0992295	0.410772
BIOCARTA_SHH_PATHWAY	0.128221	0.0856894	0.369059	0.00314908	0.126047	0.0911344	0.398874	0.07084	0.342373	0.658671
REACTOME_VITAMIN_B5_PANTOTHENATE_METABOLISM	0.147894	0.0895213	0.369059	0.00321428	0.135963	0.118537	0.452926	0.0978117	0.261461	0.59451
REACTOME_SULFUR_AMINO_ACID_METABOLISM	0.100751	0.0877872	0.369059	0.00219631	0.091188	0.122312	0.461104	0.110397	0.0613969	0.310639
REACTOME_PRESYNAPTIC_NICOTINIC_ACETYLCHOLINE_RECEPTORS	0.142259	0.0880533	0.369059	0.00584864	0.150408	0.0713151	0.385186	0.171468	0.039785	0.253909
REACTOME_APOPTOSIS	0.0425677	0.0893162	0.369059	0.000327844	0.0419221	0.0954884	0.405923	0.0540151	0.0310918	0.228016
REACTOME_INFLUENZA_LIFE_CYCLE	0.0508822	0.0893259	0.369059	0.00152173	0.056768	0.0593638	0.36487	0.0624839	0.0379556	0.249451
REACTOME_LIPOPROTEIN_METABOLISM	0.0954821	0.0862107	0.369059	0.00422013	0.100841	0.0699815	0.385186	0.0891359	0.109223	0.428748
KEGG_ENDOCYTOSIS	0.0378328	0.0899477	0.369624	0.000353606	0.033369	0.13476	0.475755	0.0320607	0.150732	0.478069
REACTOME_METABOLISM_OF_RNA	0.0349182	0.0903416	0.370053	0.000748162	0.0318824	0.123848	0.46145	0.0420251	0.0420201	0.261345
REACTOME_REGULATION_OF_ORNITHINE_DECARBOXYLASE_ODC	0.072841	0.0914292	0.372123	0.00211558	0.0711318	0.103106	0.418431	0.0857477	0.0469247	0.271761
REACTOME_NEPHRIN_INTERACTIONS	0.111939	0.0913782	0.372123	0.00181328	0.094221	0.155327	0.510881	0.146301	0.0273565	0.212002
REACTOME_P53_INDEPENDENT_G1_S_DNA_DAMAGE_CHECKPOINT	0.073955	0.0938538	0.379573	0.00245968	0.075391	0.0913988	0.398874	0.0862285	0.0507658	0.281419
REACTOME_AXON_GUIDANCE	0.0323585	0.0937775	0.379573	0.000458309	0.025943	0.179099	0.534023	0.0397941	0.0393175	0.253909
KEGG_RNA_POLYMERASE	0.0985796	0.0948416	0.381156	0.00380139	0.123312	0.0366646	0.273033	0.0922999	0.117822	0.435522
BIOCARTA_MAPK_PATHWAY	0.0520777	0.0960996	0.382602	0.000728725	0.043939	0.16032	0.516093	0.0405049	0.195574	0.532977
REACTOME_IL_7_SIGNALING	0.145067	0.0958185	0.382602	0.00770282	0.150188	0.0846613	0.393991	0.0855664	0.325922	0.657517
PID_CONE_PATHWAY	0.100086	0.0968504	0.384394	0.0072598	0.0989639	0.100653	0.410974	0.128191	0.0334588	0.231848
REACTOME_RNA_POL_I_TRANSCRIPTION_INITIATION	0.0998145	0.0977606	0.386805	0.00268789	0.0916223	0.128534	0.467996	0.0684354	0.256265	0.587658
REACTOME_CROSS_PRESENTATION_OF_SOLUBLE_EXOGENOUS_ANTIGENS_ENDOSOMES	0.0716796	0.100479	0.392816	0.00237806	0.0705556	0.109955	0.431051	0.0940639	0.0311255	0.228016
REACTOME_CDK_MEDIATED_PHOSPHORYLATION_AND_REMOVAL_OF_CDC6	0.0742647	0.100376	0.392816	0.00263513	0.0739763	0.10595	0.423137	0.0848168	0.0605886	0.308043
REACTOME_PI3K_AKT_ACTIVATION	0.0802449	0.100817	0.392816	0.00214911	0.069687	0.154155	0.510387	0.0816525	0.0949812	0.399674
REACTOME_DOWNSTREAM_SIGNAL_TRANSDUCTION	0.0510722	0.100737	0.392816	0.00104917	0.0420738	0.176341	0.534023	0.0601454	0.053253	0.29016
BIOCARTA_AGPCR_PATHWAY	0.136086	0.102735	0.398223	0.00407482	0.137398	0.099463	0.410974	0.0569073	0.495021	0.768929
BIOCARTA_EGFR_SMRTE_PATHWAY	0.141962	0.103139	0.398223	0.00407277	0.123598	0.155903	0.510881	0.138793	0.111063	0.428748
KEGG_CALCIUM_SIGNALING_PATHWAY	0.0360911	0.105746	0.398848	0.000538638	0.0259043	0.245632	0.620389	0.0475736	0.0329877	0.231848
KEGG_DILATED_CARDIOMYOPATHY	0.0506165	0.105798	0.398848	0.00159226	0.0453396	0.147407	0.498798	0.108536	0.000524175	0.0238687
BIOCARTA_RB_PATHWAY	0.129967	0.104826	0.398848	0.00740112	0.138474	0.0839783	0.393991	0.122721	0.125652	0.446008
PID_PDGFRB_PATHWAY	0.0426279	0.106922	0.400722	0.000609647	0.033394	0.206607	0.575301	0.0519907	0.0502012	0.281256
REACTOME_SIGNALING_BY_TGF_BETA_RECEPTOR_COMPLEX	0.0635806	0.106734	0.400722	0.00112085	0.0574124	0.145239	0.494974	0.0554438	0.159543	0.490015
BIOCARTA_ERYTH_PATHWAY	0.120039	0.107634	0.401039	0.00282252	0.140415	0.059833	0.36487	0.121018	0.104796	0.424175
KEGG_HYPERTROPHIC_CARDIOMYOPATHY_HCM	0.0521129	0.108132	0.401724	0.00142667	0.0457813	0.158116	0.512874	0.112906	0.000499745	0.0235991
PID_P73PATHWAY	0.0528874	0.109609	0.405301	0.000675396	0.0538756	0.103134	0.418431	0.0112788	0.732949	0.879953
REACTOME_GPCR_LIGAND_BINDING	0.0240368	0.110761	0.407933	0.000601219	0.0233011	0.12212	0.461104	0.0498233	0.000947875	0.0355453
BIOCARTA_PDGF_PATHWAY	0.081138	0.112566	0.408137	0.00130741	0.0580774	0.256049	0.63294	0.0716047	0.161417	0.490015
REACTOME_GLYCOGEN_BREAKDOWN_GLYCOGENOLYSIS	0.127555	0.11143	0.408137	0.00476768	0.136598	0.0882612	0.393991	0.140856	0.0787846	0.359541
REACTOME_SIGNALING_BY_NOTCH2	0.131923	0.113691	0.408137	0.00366549	0.120282	0.149236	0.500588	0.0802689	0.335819	0.658671
REACTOME_FORMATION_OF_TRANSCRIPTION_COUPLED_NER_TC_NER_REPAIR_COMPLEX	0.0955605	0.112912	0.408137	0.00388435	0.104406	0.0832782	0.393991	0.0649399	0.281357	0.611211
KEGG_ALANINE_ASPARTATE_AND_GLUTAMATE_METABOLISM	0.0819437	0.114708	0.410107	0.00300267	0.0787432	0.129578	0.470024	0.0822186	0.113497	0.433261
KEGG_LONG_TERM_DEPRESSION	0.0552898	0.115784	0.410107	0.000527228	0.0440832	0.209864	0.579099	0.0624483	0.0756783	0.349601
REACTOME_NETRIN1_SIGNALING	0.0758388	0.115786	0.410107	0.00234832	0.0644973	0.181055	0.536467	0.0649981	0.177691	0.505706
REACTOME_CHOLESTEROL_BIOSYNTHESIS	0.0990497	0.116357	0.410107	0.00663167	0.113988	0.0707511	0.385186	0.0598759	0.342509	0.658671
ST_WNT_CA2_CYCLIC_GMP_PATHWAY	0.0998836	0.122249	0.425027	0.00288422	0.110648	0.0869072	0.393991	0.0924356	0.15267	0.483012
REACTOME_VIF_MEDIATED_DEGRADATION_OF_APOBEC3G	0.069826	0.122386	0.425027	0.00270929	0.0720518	0.115346	0.444014	0.0774538	0.0866045	0.382008
REACTOME_INSULIN_RECEPTOR_RECYCLING	0.0950661	0.12296	0.425098	0.00268793	0.0917847	0.136428	0.480317	0.104554	0.0898073	0.389471
KEGG_VALINE_LEUCINE_AND_ISOLEUCINE_DEGRADATION	0.066771	0.126003	0.432157	0.00495463	0.0887393	0.0420069	0.299915	0.00966874	0.824658	0.926557
KEGG_RENAL_CELL_CARCINOMA	0.0545738	0.12613	0.432157	0.000928114	0.0479574	0.178917	0.534023	0.0643285	0.0713997	0.344708
REACTOME_INHIBITION_OF_REPLICATION_INITIATION_OF_DAMAGED_DNA_BY_RB1_E2F1	0.132813	0.127312	0.43504	0.00460075	0.11609	0.1826	0.536467	0.136096	0.118175	0.435522
REACTOME_PEROXISOMAL_LIPID_METABOLISM	0.0982289	0.128561	0.438135	0.0069483	0.133164	0.0393689	0.284806	0.0790061	0.221562	0.555606
REACTOME_ER_PHAGOSOME_PATHWAY	0.0605105	0.131901	0.447133	0.00219445	0.0609712	0.1327	0.473718	0.06451	0.108224	0.428748
REACTOME_CELL_CYCLE_CHECKPOINTS	0.0426602	0.132468	0.447867	0.00188015	0.0435433	0.126427	0.46563	0.0382387	0.177495	0.505706
REACTOME_SCF_BETA_TRCP_MEDIATED_DEGRADATION_OF_EMI1	0.0663374	0.132881	0.448079	0.00262556	0.0641276	0.15104	0.501746	0.077103	0.0806856	0.363513
REACTOME_SYNTHESIS_OF_VERY_LONG_CHAIN_FATTY_ACYL_COAS	0.115712	0.134024	0.449562	0.00647411	0.108255	0.160959	0.516538	0.0246882	0.749194	0.885528
REACTOME_REGULATION_OF_INSULIN_SECRETION	0.0484998	0.134848	0.451142	0.00146736	0.0347133	0.284525	0.663546	0.0520179	0.108778	0.428748
BIOCARTA_BIOPEPTIDES_PATHWAY	0.0689914	0.136525	0.453191	0.00110043	0.0565077	0.222672	0.595358	0.0559098	0.227606	0.559147
BIOCARTA_ETS_PATHWAY	0.101513	0.136174	0.453191	0.00230165	0.105306	0.122134	0.461104	0.0773839	0.255964	0.587658
KEGG_BUTANOATE_METABOLISM	0.0734301	0.138863	0.457105	0.0033978	0.0846392	0.0880147	0.393991	0.0564846	0.254917	0.586678
ST_ADRENERGIC	0.0710801	0.140474	0.457105	0.000967416	0.0616055	0.20141	0.573279	0.0588715	0.222143	0.555606
SA_TRKA_RECEPTOR	0.107	0.138583	0.457105	0.00194957	0.075259	0.297535	0.677277	0.102695	0.155171	0.4861
REACTOME_MITOCHONDRIAL_PROTEIN_IMPORT	0.0622364	0.140565	0.457105	0.00124668	0.0538592	0.202194	0.574232	0.0215817	0.60933	0.828385
REACTOME_SIGNALLING_TO_ERKS	0.0722706	0.13945	0.457105	0.00154054	0.053075	0.277782	0.656202	0.0917464	0.0606422	0.308043
NABA_BASEMENT_MEMBRANES	0.0675912	0.13964	0.457105	0.00261368	0.0758915	0.0972116	0.407381	0.110148	0.0160775	0.15648
KEGG_CARDIAC_MUSCLE_CONTRACTION	0.0513698	0.141068	0.457576	0.0018962	0.034243	0.326537	0.702371	0.0752412	0.0311016	0.228016
REACTOME_FACTORS_INVOLVED_IN_MEGAKARYOCYTE_DEVELOPMENT_AND_PLATELET_PRODUCTION	0.0399854	0.141972	0.458182	0.000749666	0.04833	0.0771876	0.390458	0.0260539	0.340748	0.658671
REACTOME_SIGNALING_BY_NOTCH4	0.122342	0.142393	0.458385	0.00323573	0.112092	0.178939	0.534023	0.0769694	0.35606	0.667613
REACTOME_ELONGATION_ARREST_AND_RECOVERY	0.0943682	0.144271	0.460947	0.00436924	0.12381	0.055417	0.347171	0.0606135	0.348341	0.660914
PID_ERBB_NETWORK_PATHWAY	0.108836	0.144633	0.46095	0.00190667	0.109677	0.141554	0.487619	0.12253	0.100527	0.414796
PID_HES_HEY_PATHWAY	0.0608397	0.145455	0.462418	0.00108777	0.0521038	0.212494	0.581513	0.0368854	0.377457	0.683668
REACTOME_SIGNALING_BY_WNT	0.0567231	0.146433	0.463223	0.00212123	0.0519969	0.187114	0.547212	0.0895435	0.0218758	0.188457
KEGG_GLYCOSAMINOGLYCAN_BIOSYNTHESIS_HEPARAN_SULFATE	0.0822161	0.147107	0.463352	0.00230844	0.0731695	0.196949	0.566893	0.0890651	0.116275	0.435522
KEGG_P53_SIGNALING_PATHWAY	0.0513336	0.147199	0.463352	0.000963122	0.0529717	0.13472	0.475755	0.0254291	0.472736	0.755378
BIOCARTA_CDC42RAC_PATHWAY	0.120669	0.147933	0.464517	0.00301044	0.11345	0.173731	0.528705	0.130291	0.118229	0.435522
REACTOME_IL_6_SIGNALING	0.130861	0.151989	0.473761	0.00171385	0.134465	0.141022	0.487619	0.0996691	0.275235	0.605043
REACTOME_AUTODEGRADATION_OF_THE_E3_UBIQUITIN_LIGASE_COP1	0.0637944	0.153173	0.475912	0.00275003	0.0631654	0.162272	0.518459	0.0749438	0.0933373	0.398092
REACTOME_APOPTOTIC_EXECUTION_PHASE	0.0573255	0.153481	0.475912	0.00086621	0.0611477	0.127882	0.466951	0.0918803	0.0221542	0.189574
BIOCARTA_EDG1_PATHWAY	0.0803385	0.156566	0.479314	0.0019318	0.0798693	0.159001	0.514437	0.0714778	0.207503	0.54875
REACTOME_SIGNALING_BY_INSULIN_RECEPTOR	0.0403584	0.156611	0.479314	0.00072654	0.0360875	0.205281	0.575301	0.0365089	0.20004	0.538082
PID_HEDGEHOG_GLI_PATHWAY	0.0610278	0.157314	0.479825	0.00175368	0.0592442	0.169805	0.528117	0.072108	0.0947383	0.399674
KEGG_CELL_CYCLE	0.0376066	0.158348	0.48183	0.00203416	0.0378402	0.155782	0.510881	0.0326986	0.219997	0.555606
REACTOME_REGULATION_OF_WATER_BALANCE_BY_RENAL_AQUAPORINS	0.0689096	0.158801	0.482061	0.00260285	0.0579031	0.236396	0.609101	0.0928492	0.0576109	0.302555
ST_STAT3_PATHWAY	0.122507	0.159586	0.482569	0.0037197	0.105775	0.224608	0.596775	0.0702905	0.419676	0.721142
KEGG_TERPENOID_BACKBONE_BIOSYNTHESIS	0.104222	0.162439	0.489617	0.00427068	0.114899	0.123554	0.46145	0.0730881	0.327274	0.657827
KEGG_TIGHT_JUNCTION	0.0362652	0.163412	0.490391	0.000764873	0.0293252	0.259754	0.63595	0.0464025	0.0745456	0.348152
KEGG_ARRHYTHMOGENIC_RIGHT_VENTRICULAR_CARDIOMYOPATHY_ARVC	0.0476115	0.163551	0.490391	0.00242915	0.0436848	0.201137	0.573279	0.121589	0.000373744	0.019061
REACTOME_OPIOID_SIGNALLING	0.0496752	0.163847	0.490391	0.00133932	0.0504228	0.157598	0.512495	0.0766513	0.0316903	0.228016
KEGG_CHRONIC_MYELOID_LEUKEMIA	0.0466017	0.169743	0.498332	0.000987195	0.0383296	0.258769	0.63595	0.0498739	0.141716	0.469591
BIOCARTA_CHREBP2_PATHWAY	0.0643365	0.170508	0.498332	0.00122545	0.0623083	0.184389	0.540479	0.0686275	0.143746	0.471484
BIOCARTA_CK1_PATHWAY	0.102629	0.168954	0.498332	0.00424555	0.110845	0.137361	0.48095	0.0361537	0.627976	0.835195
REACTOME_ZINC_TRANSPORTERS	0.102654	0.168853	0.498332	0.00291308	0.114572	0.124626	0.462999	0.0793664	0.287433	0.613865
REACTOME_ASSEMBLY_OF_THE_PRE_REPLICATIVE_COMPLEX	0.0521955	0.170052	0.498332	0.00198698	0.0488191	0.203286	0.574777	0.0534521	0.160003	0.490015
REACTOME_KINESINS	0.0825906	0.170661	0.498332	0.00248125	0.082248	0.172442	0.528705	0.0407379	0.499172	0.768929
REACTOME_FGFR2C_LIGAND_BINDING_AND_ACTIVATION	0.11423	0.17079	0.498332	0.00299551	0.106179	0.202972	0.574777	0.0969498	0.245044	0.574731
NABA_CORE_MATRISOME	0.0245096	0.168603	0.498332	0.000522529	0.0218564	0.219577	0.591622	0.0230987	0.194483	0.532977
BIOCARTA_CREB_PATHWAY	0.0773571	0.172523	0.502242	0.00289223	0.0653601	0.249083	0.624465	0.0579379	0.306925	0.634736
PID_INTEGRIN4_PATHWAY	0.118467	0.173804	0.502539	0.00477567	0.122406	0.159931	0.516093	0.176086	0.0432195	0.263152
REACTOME_S_PHASE	0.0392536	0.176579	0.509408	0.000923665	0.0355562	0.22322	0.595565	0.0462986	0.110961	0.428748
BIOCARTA_ARENRF2_PATHWAY	0.112485	0.177417	0.510675	0.00316444	0.111172	0.182529	0.536467	0.11551	0.166046	0.498796
REACTOME_COLLAGEN_FORMATION	0.0524126	0.179633	0.514552	0.00138192	0.0469016	0.229833	0.6019	0.0549543	0.15944	0.490015
BIOCARTA_IL10_PATHWAY	0.0962805	0.182626	0.515222	0.00149325	0.0901177	0.212248	0.581513	0.0782821	0.278551	0.611211
REACTOME_ACTIVATED_NOTCH1_TRANSMITS_SIGNAL_TO_THE_NUCLEUS	0.0788371	0.181594	0.515222	0.00174843	0.0619273	0.294025	0.674459	0.0393649	0.504758	0.771238
REACTOME_TRAFFICKING_OF_AMPA_RECEPTORS	0.0770861	0.182516	0.515222	0.00303082	0.0619934	0.283699	0.663546	0.0619497	0.284039	0.611211
REACTOME_CHYLOMICRON_MEDIATED_LIPID_TRANSPORT	0.0997142	0.181387	0.515222	0.00388667	0.107952	0.147921	0.498798	0.121132	0.104468	0.424175
BIOCARTA_EGF_PATHWAY	0.0688869	0.184826	0.520282	0.00118119	0.0483594	0.351908	0.71975	0.0596431	0.250927	0.581695
BIOCARTA_LEPTIN_PATHWAY	0.114872	0.187233	0.524746	0.00240929	0.104093	0.232066	0.603794	0.122213	0.16059	0.490015
SIG_CHEMOTAXIS	0.0576279	0.191713	0.532629	0.00156096	0.0455976	0.30161	0.677277	0.0829291	0.0602842	0.308043
REACTOME_PLATELET_CALCIUM_HOMEOSTASIS	0.0944046	0.191298	0.532629	0.00478323	0.0894434	0.215689	0.586135	0.0857938	0.235008	0.566419
BIOCARTA_ERK_PATHWAY	0.0724067	0.193228	0.534515	0.00125235	0.0556192	0.317587	0.691441	0.0674585	0.225447	0.558145
REACTOME_MRNA_SPLICING_MINOR_PATHWAY	0.0802378	0.192959	0.534515	0.00271688	0.108316	0.0859532	0.393991	0.0711106	0.248589	0.579435
REACTOME_RAS_ACTIVATION_UOPN_CA2_INFUX_THROUGH_NMDA_RECEPTOR	0.0996676	0.196824	0.540947	0.00329267	0.0696512	0.367082	0.724021	0.120805	0.11773	0.435522
KEGG_PENTOSE_PHOSPHATE_PATHWAY	0.0726019	0.200444	0.549717	0.00369425	0.062343	0.271604	0.648921	0.0822172	0.147102	0.474061
REACTOME_BILE_SALT_AND_ORGANIC_ANION_SLC_TRANSPORTERS	0.111355	0.201098	0.550328	0.00614325	0.110576	0.204268	0.574919	0.0850316	0.328955	0.657827
REACTOME_GLUCONEOGENESIS	0.066953	0.204821	0.55932	0.00276261	0.0666216	0.207072	0.575301	0.0522482	0.32244	0.651797
KEGG_LONG_TERM_POTENTIATION	0.0465014	0.206412	0.561264	0.000804473	0.0347878	0.344546	0.71864	0.0325803	0.376027	0.683562
BIOCARTA_HDAC_PATHWAY	0.074254	0.208317	0.561666	0.001649	0.0730138	0.216017	0.586135	0.0557278	0.345025	0.65953
REACTOME_SIGNALING_BY_FGFR	0.0361157	0.211497	0.569037	0.0012634	0.0281285	0.33049	0.705816	0.02749	0.341585	0.658671
PID_MYC_ACTIV_PATHWAY	0.0422028	0.213711	0.572373	0.000709948	0.0431366	0.203753	0.574825	0.0314788	0.353689	0.665123
REACTOME_CELL_CYCLE	0.0192529	0.213599	0.572373	0.0010983	0.0215688	0.164079	0.520035	0.0155188	0.316745	0.647194
REACTOME_REGULATION_OF_PYRUVATE_DEHYDROGENASE_PDH_COMPLEX	0.1032	0.215933	0.574923	0.00486344	0.121497	0.14517	0.494974	0.0731797	0.380238	0.687665
REACTOME_PLC_BETA_MEDIATED_EVENTS	0.0578876	0.217504	0.575027	0.00216477	0.0569183	0.225306	0.596854	0.0858337	0.0674704	0.33287
REACTOME_CELL_CYCLE_MITOTIC	0.0211381	0.22073	0.580439	0.00104159	0.022282	0.197506	0.56722	0.0178947	0.29989	0.626828
KEGG_EPITHELIAL_CELL_SIGNALING_IN_HELICOBACTER_PYLORI_INFECTION	0.0431257	0.223326	0.581421	0.0011271	0.0367941	0.298831	0.677277	0.0697521	0.048888	0.278269
KEGG_ACUTE_MYELOID_LEUKEMIA	0.0467606	0.222994	0.581421	0.00118077	0.0326264	0.395182	0.743803	0.0397791	0.299894	0.626828
REACTOME_PRE_NOTCH_EXPRESSION_AND_PROCESSING	0.0570084	0.224572	0.582156	0.00193734	0.0556177	0.236083	0.609101	0.0548483	0.242629	0.574614
REACTOME_DOPAMINE_NEUROTRANSMITTER_RELEASE_CYCLE	0.110968	0.22445	0.582156	0.00193038	0.0827248	0.36515	0.723507	0.101409	0.266941	0.600263
REACTOME_NUCLEAR_SIGNALING_BY_ERBB4	0.0584381	0.225565	0.582368	0.000912531	0.0535275	0.266987	0.642579	0.0315685	0.512693	0.774506
REACTOME_HDL_MEDIATED_LIPID_TRANSPORT	0.093124	0.227849	0.584722	0.00713482	0.105147	0.173323	0.528705	0.051128	0.507916	0.773247
REACTOME_ACETYLCHOLINE_BINDING_AND_DOWNSTREAM_EVENTS	0.0900131	0.227636	0.584722	0.00358205	0.0896449	0.229544	0.6019	0.118623	0.111851	0.429547
REACTOME_SIGNALING_BY_ROBO_RECEPTOR	0.0671864	0.227323	0.584722	0.00165639	0.0470841	0.397519	0.746004	0.0886856	0.111025	0.428748
BIOCARTA_IGF1_PATHWAY	0.0758648	0.229094	0.586738	0.0022625	0.0413359	0.512273	0.819677	0.0702949	0.26511	0.598598
REACTOME_RESPIRATORY_ELECTRON_TRANSPORT_ATP_SYNTHESIS_BY_CHEMIOSMOTIC_COUPLING_AND_HEAT_PRODUCTION_BY_UNCOUPLING_PROTEINS_	0.040204	0.229944	0.587373	0.00505889	0.0386637	0.248293	0.624465	0.0159448	0.633993	0.837659
PID_IL8_CXCR1_PATHWAY	0.0666957	0.230735	0.58741	0.00282376	0.0507173	0.362113	0.722445	0.0658484	0.236714	0.568382
KEGG_PYRUVATE_METABOLISM	0.0560322	0.232609	0.588868	0.00183413	0.0702477	0.134524	0.475755	0.0144944	0.757492	0.887686
BIOCARTA_PS1_PATHWAY	0.0919692	0.233668	0.589267	0.00380209	0.0868998	0.260455	0.636406	0.0845127	0.273778	0.604211
PID_IL2_STAT5_PATHWAY	0.0628748	0.23377	0.589267	0.00101665	0.0467944	0.375523	0.72667	0.0416339	0.430435	0.724629
WNT_SIGNALING	0.0367875	0.234467	0.589859	0.000870307	0.0300439	0.331558	0.705816	0.0477858	0.122498	0.442993
PID_EPHA2_FWD_PATHWAY	0.0807091	0.236097	0.591632	0.00429848	0.0681193	0.31732	0.691441	0.0809549	0.234674	0.566419
REACTOME_TRANSFERRIN_ENDOCYTOSIS_AND_RECYCLING	0.0685161	0.236079	0.591632	0.00267784	0.062504	0.279752	0.659636	0.0693456	0.230455	0.560743
KEGG_SELENOAMINO_ACID_METABOLISM	0.0670117	0.237322	0.59286	0.00163809	0.0858751	0.129937	0.470024	0.0175637	0.756772	0.887657
PID_FOXM1_PATHWAY	0.053944	0.238443	0.59286	0.00155654	0.0504212	0.270506	0.648605	0.0620387	0.175167	0.505706
REACTOME_MRNA_DECAY_BY_3_TO_5_EXORIBONUCLEASE	0.102696	0.238391	0.59286	0.00443743	0.0937664	0.281703	0.663013	0.115405	0.185194	0.520094
REACTOME_ABORTIVE_ELONGATION_OF_HIV1_TRANSCRIPT_IN_THE_ABSENCE_OF_TAT	0.0945477	0.238044	0.59286	0.00709592	0.123578	0.123035	0.46145	0.0594157	0.458411	0.744277
REACTOME_SIGNALING_BY_ERBB2	0.0357754	0.239776	0.595017	0.00100013	0.0260732	0.39159	0.743803	0.0336029	0.269526	0.603395
KEGG_PROTEASOME	0.0536092	0.241369	0.595502	0.0024424	0.0532856	0.250177	0.624465	0.0768542	0.0930425	0.398092
REACTOME_REGULATION_OF_INSULIN_LIKE_GROWTH_FACTOR_IGF_ACTIVITY_BY_INSULIN_LIKE_GROWTH_FACTOR_BINDING_PROTEINS_IGFBPS	0.0847881	0.240541	0.595502	0.0040414	0.0827382	0.252101	0.62682	0.0601929	0.404738	0.708791
REACTOME_UNBLOCKING_OF_NMDA_RECEPTOR_GLUTAMATE_BINDING_AND_ACTIVATION	0.0874408	0.2412	0.595502	0.00564433	0.0552532	0.458952	0.781107	0.101504	0.173676	0.505706
ST_GAQ_PATHWAY	0.0639185	0.242175	0.596339	0.0012111	0.0539837	0.323261	0.699387	0.0917026	0.0933566	0.398092
REACTOME_SIGNALING_BY_FGFR_IN_DISEASE	0.0316253	0.243426	0.598266	0.00120276	0.025059	0.355346	0.720584	0.026244	0.333056	0.658671
REACTOME_NA_CL_DEPENDENT_NEUROTRANSMITTER_TRANSPORTERS	0.0815184	0.244816	0.599377	0.00500328	0.0667833	0.340689	0.715691	0.0653422	0.35121	0.663974
REACTOME_RNA_POL_I_RNA_POL_III_AND_MITOCHONDRIAL_TRANSCRIPTION	0.0356231	0.244357	0.599377	0.000796349	0.0366625	0.233448	0.605165	0.0302496	0.328259	0.657827
PID_REELIN_PATHWAY	0.0633007	0.246757	0.602973	0.00156152	0.0628596	0.250066	0.624465	0.0403814	0.459974	0.744277
REACTOME_ANTIVIRAL_MECHANISM_BY_IFN_STIMULATED_GENES	0.0428233	0.248416	0.604715	0.00116953	0.0406259	0.273527	0.649539	0.0384828	0.299636	0.626828
REACTOME_PEPTIDE_LIGAND_BINDING_RECEPTORS	0.0252018	0.248052	0.604715	0.000822763	0.0301133	0.167528	0.524885	0.0514108	0.0184569	0.170056
REACTOME_GLYCEROPHOSPHOLIPID_BIOSYNTHESIS	0.0366471	0.252736	0.611737	0.0013305	0.040458	0.206713	0.575301	0.0402704	0.208825	0.54875
REACTOME_REGULATION_OF_INSULIN_SECRETION_BY_GLUCAGON_LIKE_PEPTIDE1	0.0558378	0.253532	0.612502	0.00275612	0.0452729	0.354564	0.720584	0.0678672	0.165199	0.498796
REACTOME_SIGNALING_BY_NOTCH3	0.0950982	0.254174	0.612894	0.00399402	0.0852635	0.306616	0.677277	0.040257	0.629309	0.835195
REACTOME_DESTABILIZATION_OF_MRNA_BY_AUF1_HNRNP_D0	0.0489823	0.256358	0.614682	0.00256787	0.0479208	0.272161	0.648921	0.065388	0.129722	0.447564
REACTOME_SIGNALING_BY_NOTCH	0.03436	0.25631	0.614682	0.00108503	0.0225153	0.456975	0.781107	0.023043	0.446497	0.734559
REACTOME_ADP_SIGNALLING_THROUGH_P2RY1	0.0731401	0.257792	0.615809	0.00314234	0.0515395	0.425207	0.768357	0.0974969	0.131433	0.447822
BIOCARTA_EIF_PATHWAY	0.0896965	0.262991	0.622269	0.00320364	0.0957555	0.232102	0.603794	0.077239	0.335102	0.658671
REACTOME_ORC1_REMOVAL_FROM_CHROMATIN	0.0419469	0.26214	0.622269	0.0015863	0.0383492	0.309318	0.679951	0.039476	0.291293	0.617967
REACTOME_RETROGRADE_NEUROTROPHIN_SIGNALLING	0.101934	0.264473	0.622269	0.00299297	0.0978314	0.284184	0.663546	0.13364	0.143477	0.471484
REACTOME_MAP_KINASE_ACTIVATION_IN_TLR_CASCADE	0.0468808	0.261963	0.622269	0.00186865	0.0457595	0.273547	0.649539	0.0435238	0.297674	0.626295
REACTOME_SIGNAL_TRANSDUCTION_BY_L1	0.0587802	0.265639	0.622269	0.0012223	0.067944	0.198199	0.567934	0.0691482	0.190364	0.526494
KEGG_GNRH_SIGNALING_PATHWAY	0.0327404	0.271795	0.624023	0.000466988	0.0204825	0.491772	0.802853	0.031079	0.296871	0.625638
BIOCARTA_STRESS_PATHWAY	0.0635124	0.272066	0.624023	0.00154369	0.0540248	0.350176	0.71975	0.0900994	0.119213	0.435522
PID_UPA_UPAR_PATHWAY	0.0490294	0.272287	0.624023	0.00245977	0.0558279	0.211288	0.580701	0.0606223	0.17466	0.505706
PID_ERBB1_INTERNALIZATION_PATHWAY	0.0531711	0.270184	0.624023	0.00154426	0.0451047	0.349603	0.71975	0.0404407	0.401672	0.707049
PID_FAK_PATHWAY	0.0426654	0.270394	0.624023	0.00118243	0.0330564	0.393146	0.743803	0.0818316	0.0361642	0.242907
REACTOME_REGULATION_OF_APOPTOSIS	0.0446098	0.271301	0.624023	0.00154711	0.0421842	0.302978	0.677277	0.0529851	0.191348	0.52807
NABA_PROTEOGLYCANS	0.0546203	0.270934	0.624023	0.000796294	0.0592428	0.232447	0.603794	0.0736451	0.137711	0.459969
BIOCARTA_TNFR1_PATHWAY	0.0586672	0.274651	0.626793	0.00141059	0.0456644	0.395162	0.743803	0.0839577	0.117974	0.435522
REACTOME_CREB_PHOSPHORYLATION_THROUGH_THE_ACTIVATION_OF_RAS	0.0641222	0.277246	0.629344	0.0024876	0.0404445	0.493145	0.802853	0.0773744	0.189832	0.526165
REACTOME_METABOLISM_OF_PORPHYRINS	0.0871437	0.276819	0.629344	0.0026509	0.0974431	0.223977	0.596338	0.0679879	0.396193	0.700237
PID_AR_TF_PATHWAY	0.0436617	0.281618	0.637004	0.00100818	0.0367686	0.364562	0.723462	0.0234393	0.563258	0.801753
REACTOME_HORMONE_LIGAND_BINDING_RECEPTORS	0.0981638	0.282551	0.637985	0.00659597	0.0777506	0.394691	0.743803	0.100711	0.270249	0.603395
REACTOME_ACTIVATION_OF_BH3_ONLY_PROTEINS	0.0847322	0.29033	0.648674	0.00254824	0.0826977	0.302068	0.677277	0.0407814	0.610806	0.828385
PID_ALK2_PATHWAY	0.0916437	0.292739	0.651777	0.00308327	0.0932539	0.284341	0.663546	0.0690983	0.427606	0.724629
KEGG_INOSITOL_PHOSPHATE_METABOLISM	0.0413151	0.294561	0.653557	0.000382863	0.0375549	0.340707	0.715691	0.0434008	0.270862	0.603395
REACTOME_ACTIVATION_OF_NMDA_RECEPTOR_UPON_GLUTAMATE_BINDING_AND_POSTSYNAPTIC_EVENTS	0.0519301	0.295243	0.653934	0.00250185	0.030149	0.543403	0.828722	0.053072	0.284752	0.611211
REACTOME_SIGNALING_BY_SCF_KIT	0.0349391	0.296813	0.654011	0.00119638	0.0192376	0.565672	0.837276	0.0211134	0.5284	0.78409
PID_VEGFR1_2_PATHWAY	0.0371813	0.297375	0.654123	0.00064459	0.0336657	0.345402	0.71864	0.0549411	0.123603	0.442993
KEGG_INSULIN_SIGNALING_PATHWAY	0.0264045	0.299075	0.654731	0.000407639	0.0197542	0.437234	0.772442	0.0144776	0.569112	0.801788
SIG_PIP3_SIGNALING_IN_CARDIAC_MYOCTES	0.0373561	0.298766	0.654731	0.000616741	0.0282994	0.431188	0.769597	0.0369297	0.304318	0.632962
REACTOME_PRE_NOTCH_PROCESSING_IN_GOLGI	0.0746738	0.301307	0.654983	0.00242724	0.074485	0.302531	0.677277	0.0423488	0.557746	0.799958
REACTOME_APOPTOSIS_INDUCED_DNA_FRAGMENTATION	0.0828199	0.301353	0.654983	0.00292549	0.0935116	0.243227	0.616754	0.0715242	0.372087	0.681624
REACTOME_DESTABILIZATION_OF_MRNA_BY_KSRP	0.0725457	0.30066	0.654983	0.00323704	0.0583583	0.405068	0.751224	0.105558	0.132064	0.447822
PID_INTEGRIN_A4B1_PATHWAY	0.0527073	0.302652	0.656559	0.0030804	0.0488483	0.33943	0.715691	0.0489716	0.338212	0.658671
REACTOME_PRE_NOTCH_TRANSCRIPTION_AND_TRANSLATION	0.0620775	0.303106	0.656559	0.00301983	0.0616	0.306841	0.677277	0.0912659	0.130027	0.447564
PID_WNT_CANONICAL_PATHWAY	0.0664665	0.303775	0.656894	0.00149661	0.0615493	0.340949	0.715691	0.0537914	0.405261	0.708791
PID_DELTA_NP63_PATHWAY	0.0437937	0.304911	0.658238	0.00105565	0.0447651	0.294311	0.674459	0.0404732	0.343045	0.658708
REACTOME_PROLACTIN_RECEPTOR_SIGNALING	0.0854251	0.3057	0.658828	0.00538602	0.0928922	0.265357	0.64101	0.064354	0.440332	0.729063
BIOCARTA_MET_PATHWAY	0.0493198	0.306416	0.659258	0.00174822	0.0279997	0.56148	0.837276	0.0739749	0.130358	0.447564
PID_HNF3B_PATHWAY	0.0445745	0.307054	0.659521	0.0011347	0.0485583	0.265834	0.64101	0.0443861	0.309104	0.636685
REACTOME_TIE2_SIGNALING	0.0713781	0.308506	0.661529	0.00247811	0.053814	0.442624	0.77356	0.0403063	0.565254	0.801753
PID_PTP1B_PATHWAY	0.0416017	0.309702	0.661743	0.000413003	0.0381162	0.35199	0.71975	0.0355542	0.385299	0.689369
REACTOME_REGULATION_OF_KIT_SIGNALING	0.0729282	0.312749	0.661743	0.00360305	0.0335489	0.642373	0.86863	-0.000781825	0.991365	0.995369
REACTOME_PROCESSING_OF_CAPPED_INTRONLESS_PRE_MRNA	0.0708016	0.31243	0.661743	0.00509126	0.0609262	0.384715	0.73835	0.067752	0.333731	0.658671
REACTOME_TRAFFICKING_OF_GLUR2_CONTAINING_AMPA_RECEPTORS	0.0810207	0.311977	0.661743	0.00385052	0.08365	0.296535	0.676736	0.080964	0.312317	0.642264
REACTOME_POST_NMDA_RECEPTOR_ACTIVATION_EVENTS	0.0535485	0.310543	0.661743	0.00230103	0.0316425	0.549016	0.829469	0.0539844	0.306621	0.634736
REACTOME_HIGHLY_CALCIUM_PERMEABLE_POSTSYNAPTIC_NICOTINIC_ACETYLCHOLINE_RECEPTORS	0.0843333	0.311923	0.661743	0.00378296	0.0777063	0.351474	0.71975	0.105489	0.205919	0.547372
REACTOME_DEADENYLATION_DEPENDENT_MRNA_DECAY	0.0473238	0.313383	0.66199	0.00213313	0.0419001	0.372069	0.72667	0.0264776	0.572716	0.805975
KEGG_NITROGEN_METABOLISM	0.0615311	0.318107	0.66546	0.00257101	0.0692861	0.260936	0.636406	0.0744466	0.227082	0.558937
REACTOME_RNA_POL_III_TRANSCRIPTION_TERMINATION	0.0702178	0.316437	0.66546	0.0042199	0.110459	0.115041	0.444014	0.0903781	0.197247	0.535084
REACTOME_RNA_POL_I_TRANSCRIPTION	0.0378988	0.31914	0.66644	0.00120633	0.0274724	0.474027	0.78881	0.0258966	0.503514	0.771238
ST_MYOCYTE_AD_PATHWAY	0.0545606	0.326885	0.669485	0.00149666	0.0370439	0.505637	0.814886	0.0809261	0.145899	0.474061
PID_RETINOIC_ACID_PATHWAY	0.0518755	0.325902	0.669485	0.00249102	0.0388193	0.462251	0.781852	0.0360278	0.49506	0.768929
REACTOME_SIGNALING_BY_EGFR_IN_CANCER	0.0295177	0.3218	0.669485	0.00127129	0.0185915	0.532613	0.825066	0.0356441	0.231543	0.56125
REACTOME_AMINO_ACID_TRANSPORT_ACROSS_THE_PLASMA_MEMBRANE	0.0513168	0.323239	0.669485	0.00301851	0.0582931	0.261814	0.63733	0.0309402	0.551453	0.795786
REACTOME_SEMA3A_PAK_DEPENDENT_AXON_REPULSION	0.0757502	0.326626	0.669485	0.00352837	0.0694761	0.368287	0.725225	0.115034	0.13632	0.459969
REACTOME_ACTIVATION_OF_KAINATE_RECEPTORS_UPON_GLUTAMATE_BINDING	0.0608067	0.323838	0.669485	0.00370913	0.0412939	0.502856	0.814513	0.112325	0.068379	0.333857
REACTOME_REGULATION_OF_MRNA_STABILITY_BY_PROTEINS_THAT_BIND_AU_RICH_ELEMENTS	0.0331211	0.32266	0.669485	0.00148724	0.0283503	0.400384	0.748399	0.0587581	0.0793405	0.359997
KEGG_ARGININE_AND_PROLINE_METABOLISM	0.0385183	0.332953	0.669856	0.00199326	0.0468677	0.238778	0.611539	0.03081	0.438678	0.729063
KEGG_HEDGEHOG_SIGNALING_PATHWAY	0.0381516	0.333089	0.669856	0.000919827	0.0370165	0.347674	0.71975	0.0330623	0.401587	0.707049
PID_ERBB1_DOWNSTREAM_PATHWAY	0.0283987	0.333064	0.669856	0.000820233	0.0158748	0.588448	0.844036	0.010481	0.722264	0.874536
REACTOME_MYOGENESIS	0.0549114	0.332882	0.669856	0.00192763	0.0472105	0.405112	0.751224	0.029479	0.603174	0.826291
REACTOME_FORMATION_OF_INCISION_COMPLEX_IN_GG_NER	0.0624831	0.333673	0.669856	0.00246421	0.0512512	0.427801	0.769145	0.0582331	0.367597	0.67534
REACTOME_RNA_POL_III_CHAIN_ELONGATION	0.0729708	0.328051	0.669856	0.0053804	0.118054	0.113579	0.441883	0.0964602	0.196052	0.532977
REACTOME_SIGNALING_BY_ERBB4	0.0307232	0.334737	0.670523	0.00066572	0.0194366	0.541697	0.82796	0.0242819	0.445837	0.734421
REACTOME_ADENYLATE_CYCLASE_INHIBITORY_PATHWAY	0.0769608	0.336846	0.673691	0.00275196	0.0824903	0.303282	0.677277	0.113678	0.156011	0.487249
BIOCARTA_INSULIN_PATHWAY	0.0604256	0.338095	0.675133	0.00205414	0.0229157	0.716392	0.894965	0.0518352	0.41122	0.714997
REACTOME_INSULIN_RECEPTOR_SIGNALLING_CASCADE	0.0304092	0.3397	0.677281	0.000982627	0.026099	0.412544	0.759699	0.0232032	0.466303	0.750677
KEGG_PROGESTERONE_MEDIATED_OOCYTE_MATURATION	0.0301264	0.34421	0.68303	0.0013262	0.0272935	0.391483	0.743803	0.0397403	0.212134	0.5496
REACTOME_OTHER_SEMAPHORIN_INTERACTIONS	0.0706761	0.34349	0.68303	0.0019387	0.0801806	0.282517	0.663546	0.0820969	0.271173	0.603395
REACTOME_FATTY_ACID_TRIACYLGLYCEROL_AND_KETONE_BODY_METABOLISM	0.0213899	0.344722	0.68303	0.000535037	0.020684	0.360882	0.722445	0.00432916	0.848343	0.938578
REACTOME_GAP_JUNCTION_ASSEMBLY	0.0642895	0.345292	0.683101	0.00399723	0.0623757	0.359843	0.722445	0.126336	0.063655	0.318275
PID_TRKR_PATHWAY	0.0355431	0.346056	0.683226	0.00118307	0.0258645	0.492915	0.802853	0.0514461	0.172612	0.505706
REACTOME_MRNA_3_END_PROCESSING	0.052398	0.346424	0.683226	0.00448312	0.0340091	0.548687	0.829469	0.0454674	0.413923	0.715111
REACTOME_PI3K_EVENTS_IN_ERBB4_SIGNALING	0.0452024	0.348559	0.684268	0.00184848	0.0315061	0.513526	0.819677	0.0492822	0.306786	0.634736
REACTOME_FORMATION_OF_THE_TERNARY_COMPLEX_AND_SUBSEQUENTLY_THE_43S_COMPLEX	0.0493926	0.349592	0.685244	0.0022235	0.0679132	0.206023	0.575301	0.0728052	0.175205	0.505706
REACTOME_DOWNREGULATION_OF_SMAD2_3_SMAD4_TRANSCRIPTIONAL_ACTIVITY	0.0693288	0.352768	0.68895	0.00344861	0.0658289	0.377602	0.727867	0.0449663	0.546712	0.793012
REACTOME_SIGNALING_BY_BMP	0.0594987	0.357277	0.692868	0.00300746	0.061537	0.341045	0.715691	0.0213681	0.740941	0.882073
REACTOME_REGULATION_OF_MITOTIC_CELL_CYCLE	0.0319028	0.357254	0.692868	0.00263373	0.0360334	0.30188	0.677277	0.0369471	0.286349	0.612575
BIOCARTA_BAD_PATHWAY	0.0539955	0.360227	0.694412	0.00184362	0.0486469	0.409768	0.755676	0.0125317	0.831838	0.927903
SIG_PIP3_SIGNALING_IN_B_LYMPHOCYTES	0.044179	0.35958	0.694412	0.00161932	0.0350056	0.467882	0.786415	0.0731327	0.129371	0.447564
REACTOME_ACTIVATION_OF_THE_MRNA_UPON_BINDING_OF_THE_CAP_BINDING_COMPLEX_AND_EIFS_AND_SUBSEQUENT_BINDING_TO_43S	0.0430733	0.365201	0.701176	0.00206983	0.0559994	0.245525	0.620389	0.0611528	0.204742	0.547267
REACTOME_RNA_POL_III_TRANSCRIPTION	0.046752	0.368144	0.701835	0.00196448	0.0667648	0.198726	0.56817	0.044071	0.396247	0.700237
REACTOME_GLUCAGON_TYPE_LIGAND_RECEPTORS	0.0491482	0.368491	0.701835	0.00339521	0.0487519	0.372366	0.72667	0.0638927	0.242366	0.574614
REACTOME_CGMP_EFFECTS	0.0596362	0.368447	0.701835	0.00204631	0.0457145	0.490553	0.802853	0.0700043	0.291083	0.617967
REACTOME_RNA_POL_III_TRANSCRIPTION_INITIATION_FROM_TYPE_3_PROMOTER	0.0531678	0.367638	0.701835	0.00240139	0.0775497	0.18883	0.549715	0.0446231	0.449577	0.735829
PID_MTOR_4PATHWAY	0.0319069	0.374805	0.704414	0.000795612	0.0228682	0.524718	0.822797	0.0473544	0.187777	0.523884
PID_ALK1_PATHWAY	0.051376	0.374302	0.704414	0.00258869	0.0629311	0.276478	0.654332	0.035283	0.541765	0.791516
REACTOME_NRIF_SIGNALS_CELL_DEATH_FROM_THE_NUCLEUS	0.0743949	0.372377	0.704414	0.00347896	0.063317	0.447733	0.776395	0.0498386	0.550115	0.795235
REACTOME_POST_CHAPERONIN_TUBULIN_FOLDING_PATHWAY	0.0610083	0.37047	0.704414	0.0033022	0.0484629	0.476819	0.791396	0.0633791	0.352166	0.663974
REACTOME_DCC_MEDIATED_ATTRACTIVE_SIGNALING	0.0742521	0.373296	0.704414	0.00440796	0.0776859	0.351601	0.71975	0.113682	0.172852	0.505706
REACTOME_FGFR4_LIGAND_BINDING_AND_ACTIVATION	0.0740786	0.374413	0.704414	0.00344992	0.0621221	0.456349	0.781107	0.0444145	0.594345	0.821008
REACTOME_INTRINSIC_PATHWAY_FOR_APOPTOSIS	0.0504392	0.373755	0.704414	0.0012955	0.0515213	0.363592	0.722659	0.0260125	0.64644	0.840312
BIOCARTA_CBL_PATHWAY	0.0702538	0.38064	0.712597	0.00302104	0.0839234	0.294959	0.674459	0.037792	0.6372	0.839203
ST_INTEGRIN_SIGNALING_PATHWAY	0.0283893	0.381441	0.712597	0.000668943	0.0206299	0.524763	0.822797	0.0396755	0.221257	0.555606
PID_EPHA_FWDPATHWAY	0.0441005	0.381159	0.712597	0.00231721	0.0213953	0.670928	0.881074	0.0228641	0.649798	0.840312
REACTOME_METABOLISM_OF_PROTEINS	0.0132959	0.382453	0.712597	0.00029992	0.0118453	0.437102	0.772442	0.00180751	0.905609	0.966461
REACTOME_ACTIVATION_OF_GENES_BY_ATF4	0.0515379	0.382505	0.712597	0.00170281	0.0440292	0.455633	0.781107	0.0901158	0.126767	0.446487
PID_SYNDECAN_4_PATHWAY	0.0452595	0.383632	0.712618	0.00150021	0.050404	0.331921	0.705816	0.0656873	0.206069	0.547372
BIOCARTA_TALL1_PATHWAY	0.0670283	0.385401	0.714426	0.00517232	0.0752023	0.330137	0.705816	0.075536	0.327996	0.657827
REACTOME_PI3K_CASCADE	0.0305849	0.387797	0.715159	0.00095531	0.0325973	0.357342	0.722445	0.0273098	0.440626	0.729063
REACTOME_M_G1_TRANSITION	0.0292072	0.389494	0.716221	0.00157995	0.0250326	0.463857	0.782547	0.0371971	0.273106	0.604211
KEGG_PROXIMAL_TUBULE_BICARBONATE_RECLAMATION	0.0555031	0.390481	0.717003	0.00260114	0.0729698	0.258902	0.63595	0.0552086	0.393001	0.697878
REACTOME_METABOLISM_OF_VITAMINS_AND_COFACTORS	0.0350597	0.391942	0.718653	0.001071	0.036688	0.370327	0.725902	0.00847537	0.836045	0.930968
REACTOME_METABOLISM_OF_POLYAMINES	0.063482	0.394844	0.721903	0.00149803	0.0551224	0.460016	0.781107	0.0456448	0.540677	0.791462
REACTOME_CRMPS_IN_SEMA3A_SIGNALING	0.065716	0.394772	0.721903	0.00306055	0.0500473	0.516926	0.820663	0.0520914	0.499955	0.768929
REACTOME_PHOSPHOLIPASE_C_MEDIATED_CASCADE	0.0350503	0.396815	0.72447	0.00155534	0.0390539	0.345116	0.71864	0.0262874	0.525115	0.782176
BIOCARTA_RARRXR_PATHWAY	0.0630247	0.398258	0.725033	0.00271916	0.0388582	0.602487	0.850615	0.0485796	0.514966	0.777019
PID_MYC_PATHWAY	0.0498978	0.397832	0.725033	0.00279402	0.0356734	0.545531	0.829469	0.0307053	0.602863	0.826291
KEGG_MAPK_SIGNALING_PATHWAY	0.0153311	0.401224	0.727276	0.000327709	0.0105215	0.564557	0.837276	0.0134361	0.461936	0.746475
REACTOME_METABOLISM_OF_MRNA	0.0191052	0.402904	0.727276	0.00107746	0.0149085	0.516489	0.820663	0.0378063	0.0989017	0.410748
REACTOME_APC_C_CDC20_MEDIATED_DEGRADATION_OF_MITOTIC_PROTEINS	0.0316419	0.401558	0.727276	0.00287132	0.0360042	0.343934	0.71864	0.0406301	0.281426	0.611211
REACTOME_ANTIGEN_PRESENTATION_FOLDING_ASSEMBLY_AND_PEPTIDE_LOADING_OF_CLASS_I_MHC	0.0541243	0.402361	0.727276	0.00230492	0.0604392	0.349729	0.71975	0.0396074	0.540005	0.791462
REACTOME_CELL_EXTRACELLULAR_MATRIX_INTERACTIONS	0.0645	0.403577	0.727464	0.00336177	0.0535846	0.487746	0.801208	0.0710082	0.35782	0.669928
BIOCARTA_IL7_PATHWAY	0.058247	0.405964	0.728847	0.00252472	0.0499621	0.47596	0.790997	0.0180049	0.797273	0.912498
REACTOME_E2F_MEDIATED_REGULATION_OF_DNA_REPLICATION	0.0423891	0.407118	0.728847	0.00243461	0.0406826	0.426264	0.768357	0.0176602	0.729817	0.878675
PID_PS1_PATHWAY	0.0353097	0.408122	0.729482	0.00165486	0.032285	0.449445	0.777253	0.0306419	0.472851	0.755378
REACTOME_DOWNSTREAM_SIGNALING_OF_ACTIVATED_FGFR	0.0248259	0.409617	0.730112	0.0011899	0.0186671	0.535252	0.827149	0.0207153	0.491431	0.767851
REACTOME_CDT1_ASSOCIATION_WITH_THE_CDC6_ORC_ORIGIN_COMPLEX	0.0340136	0.410928	0.731429	0.00233252	0.0336093	0.421281	0.768357	0.03791	0.35943	0.671192
NABA_ECM_GLYCOPROTEINS	0.0171417	0.413839	0.734564	0.000456844	0.0139811	0.505102	0.814886	0.00810809	0.699116	0.862063
PID_CERAMIDE_PATHWAY	0.0341081	0.41442	0.734575	0.000848501	0.0251621	0.547123	0.829469	0.0342203	0.412888	0.715111
BIOCARTA_UCALPAIN_PATHWAY	0.0571011	0.415262	0.735049	0.00425345	0.0519025	0.458997	0.781107	0.137923	0.0562454	0.302555
KEGG_PROPANOATE_METABOLISM	0.0422506	0.416043	0.735413	0.00434485	0.0479909	0.35559	0.720584	-0.00629189	0.903599	0.966461
KEGG_TRYPTOPHAN_METABOLISM	0.0370254	0.418428	0.737588	0.00364163	0.0580362	0.204685	0.574919	0.00191574	0.966605	0.993974
BIOCARTA_HER2_PATHWAY	0.0498847	0.418291	0.737588	0.00145016	0.0254155	0.680067	0.883347	0.0370587	0.54765	0.79347
PID_LIS1_PATHWAY	0.0450283	0.42717	0.750834	0.00158175	0.0572438	0.312757	0.683253	0.037262	0.511123	0.774506
PID_P38_ALPHA_BETA_DOWNSTREAM_PATHWAY	0.0385314	0.430744	0.751843	0.00102779	0.0275514	0.573169	0.83792	0.0486066	0.320252	0.651797
PID_FGF_PATHWAY	0.0307394	0.43128	0.751843	0.00118654	0.0181404	0.642336	0.86863	0.0310726	0.426305	0.723753
REACTOME_SIGNALING_BY_ACTIVATED_POINT_MUTANTS_OF_FGFR1	0.0688051	0.429568	0.751843	0.00312868	0.071131	0.414138	0.761538	0.0498557	0.567066	0.801753
REACTOME_NCAM_SIGNALING_FOR_NEURITE_OUT_GROWTH	0.0284793	0.431809	0.751843	0.000723814	0.0107475	0.766729	0.916636	0.0173463	0.632081	0.835999
REACTOME_G_PROTEIN_BETA_GAMMA_SIGNALLING	0.0486921	0.429504	0.751843	0.00225373	0.0299833	0.626624	0.860177	0.110613	0.0726994	0.348152
BIOCARTA_41BB_PATHWAY	0.0548164	0.434171	0.752878	0.00137161	0.0582934	0.405591	0.751224	0.033986	0.627759	0.835195
REACTOME_CASPASE_MEDIATED_CLEAVAGE_OF_CYTOSKELETAL_PROTEINS	0.0650586	0.435342	0.753886	0.00497171	0.0660641	0.42828	0.769145	0.177045	0.0337665	0.232715
PID_BETA_CATENIN_DEG_PATHWAY	0.0544489	0.437259	0.755159	0.0017045	0.0621957	0.374889	0.72667	0.0634591	0.365265	0.673708
REACTOME_RNA_POL_III_TRANSCRIPTION_INITIATION_FROM_TYPE_2_PROMOTER	0.0487339	0.439767	0.757443	0.00266186	0.0829843	0.188322	0.549487	0.0776286	0.218452	0.555606
REACTOME_CELL_SURFACE_INTERACTIONS_AT_THE_VASCULAR_WALL	0.0246381	0.43919	0.757443	0.00156413	0.033506	0.292807	0.674459	0.0342264	0.282553	0.611211
REACTOME_GLUTAMATE_NEUROTRANSMITTER_RELEASE_CYCLE	0.0592949	0.442579	0.758755	0.00271806	0.0442598	0.566546	0.837276	0.0194949	0.800693	0.913951
KEGG_GLYCEROPHOSPHOLIPID_METABOLISM	0.0256334	0.44402	0.759649	0.000744363	0.0235618	0.481707	0.795929	0.0319234	0.340469	0.658671
KEGG_PROSTATE_CANCER	0.0236332	0.444988	0.760287	0.000893828	0.0132712	0.667991	0.879825	0.031875	0.302936	0.631116
ST_PHOSPHOINOSITIDE_3_KINASE_PATHWAY	0.0367766	0.445668	0.760432	0.00185097	0.0273476	0.570632	0.837276	0.0516658	0.28398	0.611211
BIOCARTA_PGC1A_PATHWAY	0.0502773	0.448306	0.761575	0.00191846	0.061821	0.351164	0.71975	0.0371572	0.575224	0.808611
KEGG_ALZHEIMERS_DISEASE	0.0179545	0.451926	0.7657	0.00140345	0.0134416	0.573342	0.83792	0.00983701	0.680251	0.854503
PID_RAC1_PATHWAY	0.0304612	0.452551	0.7657	0.000880101	0.0292162	0.471238	0.787696	0.0305591	0.455545	0.741788
REACTOME_SYNTHESIS_OF_SUBSTRATES_IN_N_GLYCAN_BIOSYTHESIS	0.0577552	0.454516	0.767334	0.00165609	0.0505376	0.512828	0.819677	0.0325352	0.673523	0.851671
BIOCARTA_IL2RB_PATHWAY	0.0344358	0.463197	0.768786	0.000910476	0.0208546	0.656848	0.873519	0.0183097	0.696496	0.862063
ST_GA13_PATHWAY	0.0354394	0.462384	0.768786	0.00101064	0.0198808	0.680136	0.883347	0.0581134	0.228154	0.559417
REACTOME_ACTIVATED_POINT_MUTANTS_OF_FGFR2	0.0533658	0.460096	0.768786	0.00241088	0.0571282	0.42908	0.769145	0.0367074	0.61138	0.828385
REACTOME_INSULIN_SYNTHESIS_AND_PROCESSING	0.0500347	0.462642	0.768786	0.00208805	0.0402665	0.554449	0.833977	0.0401674	0.555425	0.799152
REACTOME_HEPARAN_SULFATE_HEPARIN_HS_GAG_METABOLISM	0.0296072	0.465323	0.771314	0.00110641	0.0235905	0.560744	0.837276	0.0282163	0.486549	0.766339
PID_ERBB1_RECEPTOR_PROXIMAL_PATHWAY	0.0356196	0.466384	0.77207	0.00153372	0.0204024	0.67653	0.88225	0.053931	0.270106	0.603395
BIOCARTA_ALK_PATHWAY	0.0345987	0.467015	0.772115	0.00143813	0.0347796	0.464689	0.782547	0.0134471	0.777417	0.900278
REACTOME_TRANS_GOLGI_NETWORK_VESICLE_BUDDING	0.029065	0.469257	0.772931	0.000826247	0.025071	0.53247	0.825066	0.0310374	0.439644	0.729063
REACTOME_HEMOSTASIS	0.0103615	0.47175	0.773936	0.000475274	0.0120206	0.404331	0.751224	0.0168602	0.242146	0.574614
REACTOME_GLYCOSAMINOGLYCAN_METABOLISM	0.0200661	0.473034	0.775048	0.000353507	0.0165206	0.554679	0.833977	0.00424488	0.87935	0.955767
PID_RAC1_REG_PATHWAY	0.0335825	0.474354	0.776215	0.0011374	0.0205343	0.661788	0.87644	0.0406322	0.386713	0.689594
REACTOME_LYSOSOME_VESICLE_BIOGENESIS	0.0471878	0.476682	0.778033	0.001864	0.0400531	0.545812	0.829469	0.0351168	0.596388	0.82116
REACTOME_CREB_PHOSPHORYLATION_THROUGH_THE_ACTIVATION_OF_CAMKII	0.0593547	0.476656	0.778033	0.0038667	0.0257659	0.757363	0.91549	0.08983	0.281435	0.611211
BIOCARTA_NKCELLS_PATHWAY	0.0470072	0.478371	0.7788	0.00114123	0.0305958	0.644497	0.86863	0.081033	0.22168	0.555606
NABA_COLLAGENS	0.0308236	0.479988	0.780439	0.00190488	0.024981	0.567026	0.837276	0.0467187	0.28437	0.611211
SIG_CD40PATHWAYMAP	0.0346911	0.484412	0.780465	0.00171508	0.0293612	0.553988	0.833977	0.0385035	0.43771	0.729063
REACTOME_SYNTHESIS_OF_PA	0.0391224	0.482057	0.780465	0.00195633	0.0476161	0.392208	0.743803	0.039218	0.480989	0.76087
REACTOME_SIGNAL_AMPLIFICATION	0.0396079	0.48489	0.780465	0.00290512	0.0228238	0.687329	0.88718	0.0636098	0.261983	0.59451
REACTOME_AMINO_ACID_SYNTHESIS_AND_INTERCONVERSION_TRANSAMINATION	0.0507932	0.482006	0.780465	0.0037114	0.0415492	0.565208	0.837276	0.0519607	0.471994	0.755378
KEGG_CIRCADIAN_RHYTHM_MAMMAL	0.0557754	0.486405	0.780937	0.00434211	0.0397249	0.620079	0.855997	0.0555964	0.487805	0.766895
KEGG_THYROID_CANCER	0.0368733	0.492335	0.78478	0.00144738	0.0177961	0.740363	0.910309	0.03296	0.539393	0.791462
REACTOME_SIGNALLING_TO_RAS	0.0383909	0.490286	0.78478	0.00156524	0.0141714	0.798995	0.928287	0.0609772	0.273207	0.604211
REACTOME_AKT_PHOSPHORYLATES_TARGETS_IN_THE_CYTOSOL	0.0572426	0.492483	0.78478	0.00418048	0.0508476	0.54207	0.82796	0.0837726	0.315152	0.644973
KEGG_NON_SMALL_CELL_LUNG_CANCER	0.0268695	0.49544	0.787527	0.00112059	0.00856807	0.827918	0.938954	0.0226713	0.565176	0.801753
PID_LPA4_PATHWAY	0.0509309	0.494834	0.787527	0.00244789	0.0596339	0.424123	0.768357	0.092569	0.214707	0.549845
PID_S1P_META_PATHWAY	0.0426925	0.498526	0.791449	0.00195045	0.0357859	0.570498	0.837276	0.0787388	0.211937	0.5496
KEGG_ADIPOCYTOKINE_SIGNALING_PATHWAY	0.023768	0.502137	0.791632	0.00049371	0.021889	0.536527	0.827164	0.019487	0.58215	0.81208
BIOCARTA_ACTINY_PATHWAY	0.0459162	0.500284	0.791632	0.00329911	0.0365533	0.591546	0.84492	0.0734879	0.294426	0.623577
PID_HIF1A_PATHWAY	0.0485345	0.501701	0.791632	0.00285506	0.0740789	0.305175	0.677277	0.0546741	0.449171	0.735829
PID_NCADHERIN_PATHWAY	0.0349423	0.501187	0.791632	0.00166067	0.0320065	0.537823	0.827164	0.0713153	0.169819	0.505706
REACTOME_FGFR_LIGAND_BINDING_AND_ACTIVATION	0.0413421	0.502358	0.791632	0.00204053	0.0517791	0.400837	0.748399	0.0159437	0.795875	0.911717
BIOCARTA_CARDIACEGF_PATHWAY	0.0462761	0.509108	0.799248	0.00260525	0.0469687	0.502789	0.814513	0.0682859	0.329936	0.658322
PID_INTEGRIN5_PATHWAY	0.0461176	0.51056	0.799608	0.00226983	0.0618855	0.377275	0.727867	0.0768645	0.272801	0.604211
PID_ECADHERIN_STABILIZATION_PATHWAY	0.0299085	0.513358	0.799608	0.000972289	0.0262697	0.565904	0.837276	0.0392878	0.396526	0.700237
REACTOME_SIGNALLING_TO_P38_VIA_RIT_AND_RIN	0.0485465	0.515252	0.801085	0.00309435	0.027743	0.710006	0.894965	0.0402166	0.589863	0.817473
REACTOME_PKA_MEDIATED_PHOSPHORYLATION_OF_CREB	0.0467276	0.517759	0.802167	0.00190342	0.048216	0.504513	0.814886	0.0383171	0.595845	0.82116
REACTOME_ION_TRANSPORT_BY_P_TYPE_ATPASES	0.0330682	0.517831	0.802167	0.00153149	0.0287201	0.574349	0.83792	0.0330894	0.517563	0.779095
BIOCARTA_RAC1_PATHWAY	0.0387605	0.520229	0.803934	0.00187863	0.044516	0.46023	0.781107	0.0235856	0.695606	0.862063
BIOCARTA_TEL_PATHWAY	0.0448852	0.521924	0.805578	0.00195079	0.0451654	0.519329	0.821414	0.0620306	0.376158	0.683562
REACTOME_MITOTIC_M_M_G1_PHASES	0.0148525	0.523203	0.805606	0.00152234	0.0148413	0.524818	0.822797	0.00499785	0.829904	0.926557
REACTOME_DEADENYLATION_OF_MRNA	0.0442077	0.528225	0.81041	0.00276222	0.0431312	0.538318	0.827164	0.0354002	0.613518	0.830398
BIOCARTA_LONGEVITY_PATHWAY	0.0465458	0.532715	0.813101	0.00241759	0.0314209	0.673651	0.88134	0.0359657	0.629765	0.835195
PID_GLYPICAN_1PATHWAY	0.0348335	0.531361	0.813101	0.00190248	0.0292136	0.599623	0.848592	0.00224005	0.967892	0.99441
PID_IGF1_PATHWAY	0.0335096	0.53265	0.813101	0.00217179	0.0204216	0.703752	0.894965	0.0318376	0.553294	0.797119
REACTOME_CTNNB1_PHOSPHORYLATION_CASCADE	0.0479748	0.534432	0.813101	0.00434487	0.0392078	0.611647	0.855235	0.12324	0.110511	0.428748
PID_CASPASE_PATHWAY	0.0248625	0.535883	0.814339	0.0011309	0.0251374	0.531386	0.825066	0.0517655	0.201769	0.541591
REACTOME_SEMA3A_PLEXIN_REPULSION_SIGNALING_BY_INHIBITING_INTEGRIN_ADHESION	0.0493415	0.538061	0.814706	0.00452092	0.0431755	0.590025	0.844403	0.097533	0.22355	0.555606
REACTOME_METAL_ION_SLC_TRANSPORTERS	0.0378927	0.538675	0.814706	0.00183235	0.048734	0.429108	0.769145	0.0265821	0.666251	0.849469
REACTOME_CYTOSOLIC_TRNA_AMINOACYLATION	0.0360822	0.540936	0.815519	0.00243675	0.0441826	0.454064	0.780888	0.0252271	0.669042	0.849884
KEGG_AMINO_SUGAR_AND_NUCLEOTIDE_SUGAR_METABOLISM	0.0268202	0.543454	0.81604	0.000903299	0.0302577	0.493047	0.802853	0.0194628	0.659272	0.846497
BIOCARTA_PROTEASOME_PATHWAY	0.034962	0.545447	0.816411	0.00285285	0.0451086	0.435355	0.772442	0.0601277	0.29844	0.626828
REACTOME_PIP3_ACTIVATES_AKT_SIGNALING	0.0335841	0.54619	0.816411	0.00255312	0.0239934	0.666367	0.879735	0.0519806	0.35028	0.663607
BIOCARTA_P53_PATHWAY	0.0427922	0.55363	0.818599	0.00258245	0.0554117	0.443077	0.77356	0.00472927	0.947806	0.990042
PID_MYC_REPRESS_PATHWAY	0.0216582	0.553069	0.818599	0.0006765	0.0224941	0.537855	0.827164	0.0361504	0.322139	0.651797
REACTOME_CD28_DEPENDENT_PI3K_AKT_SIGNALING	0.0375617	0.551528	0.818599	0.0034387	0.0348803	0.580289	0.841782	0.00899614	0.886593	0.959597
REACTOME_DNA_REPLICATION	0.0129403	0.55529	0.819469	0.0012828	0.0127805	0.561271	0.837276	0.00384482	0.860879	0.943784
REACTOME_CTLA4_INHIBITORY_SIGNALING	0.0379642	0.556946	0.820966	0.00316439	0.01737	0.788123	0.925459	0.0724847	0.262082	0.59451
REACTOME_PI3K_EVENTS_IN_ERBB2_SIGNALING	0.0259134	0.561764	0.825213	0.00148126	0.0155802	0.7272	0.90327	0.0360482	0.419581	0.721142
REACTOME_NEGATIVE_REGULATION_OF_FGFR_SIGNALING	0.029161	0.562529	0.825387	0.00219125	0.0274604	0.585536	0.842697	-0.00232943	0.963104	0.992866
BIOCARTA_NKT_PATHWAY	0.0307002	0.567556	0.82801	0.00241332	0.0545614	0.309649	0.679951	0.0569637	0.28883	0.615817
BIOCARTA_CCR3_PATHWAY	0.0351288	0.568697	0.828728	0.00179884	0.0291021	0.636793	0.867614	0.0765218	0.214391	0.549845
REACTOME_SYNTHESIS_OF_PE	0.0492721	0.571613	0.832029	0.00244789	0.0545666	0.531012	0.825066	0.0599282	0.491442	0.767851
KEGG_GLYCOLYSIS_GLUCONEOGENESIS	0.0211572	0.574874	0.833926	0.00170851	0.0253485	0.501584	0.814513	-0.00676524	0.857663	0.942226
PID_INTEGRIN3_PATHWAY	0.024977	0.575986	0.834581	0.00176962	0.0456657	0.306548	0.677277	0.0565095	0.205766	0.547372
KEGG_PHENYLALANINE_METABOLISM	0.0387953	0.579923	0.835318	0.00337342	0.0660764	0.345824	0.71864	0.033748	0.630171	0.835195
KEGG_HUNTINGTONS_DISEASE	0.0127416	0.580409	0.835318	0.00135104	0.0126326	0.583655	0.842697	0.00822956	0.721069	0.873919
PID_ARF_3PATHWAY	0.0384061	0.58373	0.836216	0.00165608	0.0373895	0.593728	0.84492	0.0429326	0.540191	0.791462
REACTOME_APOPTOTIC_CLEAVAGE_OF_CELLULAR_PROTEINS	0.0256273	0.585105	0.836216	0.00123682	0.0264581	0.572998	0.83792	0.0818695	0.0811455	0.364298
REACTOME_GOLGI_ASSOCIATED_VESICLE_BIOGENESIS	0.0233888	0.587835	0.836216	0.00120287	0.0176517	0.682515	0.883743	0.0326632	0.449118	0.735829
REACTOME_PI_3K_CASCADE	0.0213402	0.58823	0.836216	0.00129426	0.020291	0.606704	0.852053	0.0151187	0.701302	0.862257
REACTOME_RECYCLING_PATHWAY_OF_L1	0.0328166	0.586173	0.836216	0.00358917	0.0331836	0.581992	0.842697	0.052532	0.383511	0.689369
REACTOME_EGFR_DOWNREGULATION	0.0366649	0.590414	0.836512	0.00238888	0.035177	0.60558	0.852053	0.0351107	0.60626	0.828377
KEGG_UBIQUITIN_MEDIATED_PROTEOLYSIS	0.0143577	0.591729	0.836537	0.00118924	0.00194543	0.942553	0.983333	-0.00850296	0.751777	0.885528
REACTOME_DAG_AND_IP3_SIGNALING	0.0297314	0.59317	0.836723	0.00282357	0.0284678	0.608971	0.853361	0.0345787	0.53437	0.789031
KEGG_OXIDATIVE_PHOSPHORYLATION	0.0144836	0.597987	0.837866	0.00269391	0.0146014	0.595014	0.84492	-0.00136067	0.960491	0.992866
BIOCARTA_G2_PATHWAY	0.0310137	0.599225	0.837866	0.00273805	0.0417638	0.47915	0.794233	0.0159383	0.787108	0.905743
BIOCARTA_EIF4_PATHWAY	0.0317344	0.598584	0.837866	0.00321964	0.0198184	0.742334	0.910464	0.0253041	0.674657	0.851671
PID_INSULIN_PATHWAY	0.0229508	0.598947	0.837866	0.00163444	0.00232921	0.957434	0.99077	0.0327093	0.453538	0.740412
PID_NOTCH_PATHWAY	0.0201834	0.598895	0.837866	0.00102207	0.0143756	0.707933	0.894965	0.0125151	0.744312	0.883554
PID_IL2_PI3K_PATHWAY	0.0261077	0.598735	0.837866	0.00109305	0.0207415	0.675904	0.88225	0.0194271	0.695378	0.862063
REACTOME_G_BETA_GAMMA_SIGNALLING_THROUGH_PI3KGAMMA	0.0350232	0.597366	0.837866	0.00250665	0.0135533	0.838041	0.943627	0.0984865	0.137467	0.459969
REACTOME_L1CAM_INTERACTIONS	0.0173926	0.596434	0.837866	0.000980379	0.0168406	0.608143	0.853135	0.0164677	0.616109	0.832139
REACTOME_NOTCH_HLH_TRANSCRIPTION_PATHWAY	0.0428962	0.607011	0.844662	0.00551827	0.0413194	0.62029	0.855997	0.0754474	0.365652	0.673708
PID_ER_NONGENOMIC_PATHWAY	0.0236093	0.610404	0.846092	0.001309	0.00398976	0.931387	0.978071	0.0403568	0.383803	0.689369
REACTOME_AQUAPORIN_MEDIATED_TRANSPORT	0.0227854	0.609922	0.846092	0.00264029	0.0151028	0.73524	0.909338	0.0543741	0.223422	0.555606
PID_PRL_SIGNALING_EVENTS_PATHWAY	0.0312002	0.612695	0.848347	0.00245056	0.0325153	0.597799	0.846993	0.0288247	0.640009	0.839584
REACTOME_NUCLEOTIDE_EXCISION_REPAIR	0.0220324	0.617686	0.853079	0.00173086	0.0241613	0.584132	0.842697	0.0202498	0.646417	0.840312
BIOCARTA_VITCB_PATHWAY	0.0433287	0.618876	0.853208	0.00386614	0.0495761	0.569242	0.837276	0.126425	0.146656	0.474061
KEGG_VIBRIO_CHOLERAE_INFECTION	0.0200025	0.625246	0.854811	0.00185472	0.0166437	0.68444	0.88449	0.0100345	0.806437	0.916355
BIOCARTA_PYK2_PATHWAY	0.0275791	0.633416	0.854811	0.00288493	0.00116607	0.983912	0.996134	0.0301117	0.602562	0.826291
ST_INTERFERON_GAMMA_PATHWAY	0.0439956	0.630073	0.854811	0.00187398	0.0435678	0.633405	0.865767	-0.011777	0.897418	0.964284
PID_AVB3_OPN_PATHWAY	0.0261604	0.626174	0.854811	0.00183007	0.0163817	0.760339	0.91549	0.0727501	0.175532	0.505706
PID_A6B1_A6B4_INTEGRIN_PATHWAY	0.0208016	0.629789	0.854811	0.00136016	0.0246298	0.568181	0.837276	0.0614085	0.154741	0.485948
PID_TGFBR_PATHWAY	0.0195952	0.625621	0.854811	0.00169436	0.0104822	0.794097	0.925459	0.00640078	0.873376	0.953223
REACTOME_ARMS_MEDIATED_ACTIVATION	0.0348371	0.629653	0.854811	0.00184977	0.019924	0.782711	0.924496	0.0435982	0.546185	0.793012
REACTOME_SEMAPHORIN_INTERACTIONS	0.0179181	0.629137	0.854811	0.000644314	0.020267	0.584895	0.842697	0.0465067	0.210031	0.54875
REACTOME_REGULATION_OF_AMPK_ACTIVITY_VIA_LKB1	0.0374245	0.627937	0.854811	0.00229402	0.0292701	0.704661	0.894965	0.0275871	0.720912	0.873919
REACTOME_AMYLOIDS	0.0192047	0.632524	0.854811	0.00212004	0.017366	0.668474	0.879825	0.0233498	0.568568	0.801788
BIOCARTA_GPCR_PATHWAY	0.024727	0.639591	0.85681	0.00169529	0.0127692	0.808921	0.934656	0.00169124	0.97445	0.9951
REACTOME_NUCLEAR_RECEPTOR_TRANSCRIPTION_PATHWAY	0.0197931	0.639299	0.85681	0.000730392	0.0157342	0.70947	0.894965	0.0245206	0.561497	0.801753
REACTOME_NITRIC_OXIDE_STIMULATES_GUANYLATE_CYCLASE	0.0273289	0.6365	0.85681	0.00137659	0.0201669	0.72728	0.90327	0.0397324	0.492027	0.767851
REACTOME_CLEAVAGE_OF_GROWING_TRANSCRIPT_IN_THE_TERMINATION_REGION_	0.0241807	0.636295	0.85681	0.00371874	0.00246661	0.96213	0.992415	0.0201946	0.692893	0.862063
KEGG_OOCYTE_MEIOSIS	0.0134404	0.646871	0.864056	0.00106486	0.0178793	0.542255	0.82796	0.0178571	0.542756	0.791777
PID_HDAC_CLASSI_PATHWAY	0.0166847	0.647704	0.864056	0.00143401	0.0141925	0.697499	0.89407	-0.00732563	0.840987	0.934023
REACTOME_ABCA_TRANSPORTERS_IN_LIPID_HOMEOSTASIS	0.0330301	0.647525	0.864056	0.00278646	0.0278093	0.700285	0.89407	0.0112598	0.876145	0.953223
REACTOME_SIGNALING_BY_FGFR3_MUTANTS	0.0393887	0.651118	0.864422	0.00288107	0.0386038	0.657623	0.873586	0.0109583	0.899883	0.965783
KEGG_PHOSPHATIDYLINOSITOL_SIGNALING_SYSTEM	0.0152196	0.653853	0.865101	0.000404633	0.0113958	0.737056	0.909338	0.0199863	0.555959	0.799152
BIOCARTA_IGF1R_PATHWAY	0.0276338	0.65389	0.865101	0.00243069	0.00929727	0.880094	0.96105	-0.00114362	0.985196	0.9951
REACTOME_MITOTIC_G2_G2_M_PHASES	0.0150148	0.653903	0.865101	0.000845839	0.0209551	0.531497	0.825066	0.0145794	0.663314	0.847969
PID_TELOMERASE_PATHWAY	0.015807	0.657749	0.868421	0.00108237	0.0262151	0.462504	0.781852	-0.00425529	0.905067	0.966461
REACTOME_TRANSCRIPTION_COUPLED_NER_TC_NER	0.0207947	0.657771	0.868421	0.00203446	0.0235723	0.615553	0.855997	0.022905	0.625587	0.835195
KEGG_ADHERENS_JUNCTION	0.0153112	0.660886	0.871632	0.000697558	0.0175432	0.615219	0.855997	0.0324839	0.352003	0.663974
BIOCARTA_CERAMIDE_PATHWAY	0.026458	0.667714	0.87792	0.00152235	0.0228723	0.710558	0.894965	0.0429497	0.485885	0.766339
BIOCARTA_VIP_PATHWAY	0.0258116	0.675363	0.882529	0.00281553	0.0164529	0.789507	0.925459	0.00111014	0.985629	0.9951
BIOCARTA_ACH_PATHWAY	0.0305035	0.672858	0.882529	0.00221596	0.0267518	0.711161	0.894965	0.0199135	0.782822	0.902993
REACTOME_GAP_JUNCTION_TRAFFICKING	0.0242286	0.675228	0.882529	0.00235555	0.0156892	0.786151	0.925459	0.0725279	0.209762	0.54875
NABA_SECRETED_FACTORS	0.00681213	0.673659	0.882529	0.000221017	0.0147214	0.362785	0.722445	0.0155245	0.3372	0.658671
REACTOME_NRAGE_SIGNALS_DEATH_THROUGH_JNK	0.0183908	0.676946	0.882792	0.000761264	0.00602065	0.89151	0.964733	0.00635979	0.885439	0.959163
BIOCARTA_MCALPAIN_PATHWAY	0.0243256	0.680202	0.885233	0.00283624	0.0235283	0.690131	0.888106	0.0372049	0.537112	0.791462
BIOCARTA_TPO_PATHWAY	0.0241416	0.682488	0.885502	0.0024515	-0.00229606	0.968965	0.993381	0.005427	0.926731	0.974979
PID_IL27_PATHWAY	0.0232241	0.682142	0.885502	0.000895181	0.0361338	0.523997	0.822797	-0.0156463	0.782616	0.902993
REACTOME_CELL_DEATH_SIGNALLING_VIA_NRAGE_NRIF_AND_NADE	0.0158391	0.68242	0.885502	0.000750878	0.00692415	0.858042	0.950997	-0.000457763	0.990565	0.995369
REACTOME_SYNTHESIS_OF_DNA	0.0127211	0.686111	0.888399	0.00102778	0.00889472	0.778767	0.922395	0.0197628	0.530107	0.78409
REACTOME_DESTABILIZATION_OF_MRNA_BY_TRISTETRAPROLIN_TTP	0.0279343	0.69023	0.890125	0.00391774	0.0130955	0.85179	0.948215	0.0552197	0.430799	0.724629
PID_HDAC_CLASSIII_PATHWAY	0.0228992	0.692109	0.89026	0.00202763	0.0286265	0.620575	0.855997	-0.00601351	0.917176	0.971729
BIOCARTA_SODD_PATHWAY	0.0358428	0.694782	0.890603	0.00342993	0.0240627	0.79223	0.925459	0.0175123	0.847971	0.938578
REACTOME_TRANSLATION	0.0110007	0.694039	0.890603	0.00138212	0.0152818	0.586468	0.843089	0.0339586	0.226752	0.558937
PID_ECADHERIN_KERATINOCYTE_PATHWAY	0.0257998	0.697208	0.891032	0.00266646	0.0110486	0.867665	0.954282	0.0606157	0.360634	0.672235
PID_IL8_CXCR2_PATHWAY	0.0200485	0.699553	0.89284	0.00215353	-0.000366524	0.994371	0.996772	0.0259741	0.617083	0.832573
REACTOME_TGF_BETA_RECEPTOR_SIGNALING_ACTIVATES_SMADS	0.0242006	0.701234	0.89284	0.00446974	0.0251649	0.689936	0.888106	0.0213961	0.734462	0.880535
REACTOME_CHONDROITIN_SULFATE_BIOSYNTHESIS	0.0254386	0.701242	0.89284	0.00247597	0.020848	0.753208	0.91549	0.0201493	0.761223	0.888831
REACTOME_IL_3_5_AND_GM_CSF_SIGNALING	0.0171234	0.701417	0.89284	0.0009269	0.00858666	0.847537	0.948215	-0.00650602	0.884178	0.959062
KEGG_PYRIMIDINE_METABOLISM	0.0114999	0.710144	0.893271	0.000740692	0.0246615	0.425434	0.768357	0.00356151	0.908363	0.966747
BIOCARTA_CDMAC_PATHWAY	0.0278213	0.709225	0.893271	0.00234172	0.00912509	0.902657	0.970223	0.0350255	0.638743	0.839584
PID_NETRIN_PATHWAY	0.0198716	0.706678	0.893271	0.00207795	0.00152297	0.976991	0.994521	0.0274365	0.603354	0.826291
REACTOME_GAB1_SIGNALOSOME	0.0182502	0.705086	0.893271	0.00175497	0.00820428	0.864903	0.954282	0.023649	0.623836	0.835195
REACTOME_CA_DEPENDENT_EVENTS	0.0216973	0.707504	0.893271	0.0024108	0.0222683	0.700175	0.89407	0.0256525	0.657326	0.84485
REACTOME_G_PROTEIN_ACTIVATION	0.0230477	0.708439	0.893271	0.004945	0.0228054	0.711367	0.894965	0.0961251	0.118843	0.435522
REACTOME_G_ALPHA_I_SIGNALLING_EVENTS	0.00814597	0.704373	0.893271	0.000927391	0.00781236	0.715947	0.894965	0.0441541	0.039726	0.253909
BIOCARTA_CALCINEURIN_PATHWAY	0.027462	0.712813	0.89401	0.00187204	0.0202975	0.785581	0.925459	0.00167995	0.982036	0.9951
BIOCARTA_KERATINOCYTE_PATHWAY	0.015843	0.713529	0.89401	0.00107356	0.0114912	0.790025	0.925459	0.0120109	0.780765	0.902516
KEGG_GLYCEROLIPID_METABOLISM	0.0150287	0.716372	0.896693	0.0018018	0.0204195	0.621568	0.855997	0.0153256	0.711019	0.86961
REACTOME_3_UTR_MEDIATED_TRANSLATIONAL_REGULATION	0.0123912	0.722568	0.900041	0.00193416	0.0162011	0.644914	0.86863	0.0486663	0.166265	0.498796
PID_NEPHRIN_NEPH1_PATHWAY	0.0183738	0.723573	0.900416	0.000988983	0.00423385	0.935045	0.981106	0.0284433	0.584022	0.813801
REACTOME_EFFECTS_OF_PIP2_HYDROLYSIS	0.0211367	0.725863	0.901509	0.00197024	0.0182018	0.762693	0.91597	-0.000755146	0.990005	0.995369
REACTOME_ADENYLATE_CYCLASE_ACTIVATING_PATHWAY	0.0319378	0.726619	0.901573	0.00289383	0.0412276	0.651757	0.873006	0.088701	0.33154	0.658671
BIOCARTA_GCR_PATHWAY	0.0246233	0.733227	0.902172	0.00165802	0.0293572	0.684476	0.88449	0.0621551	0.389596	0.693764
REACTOME_ASSOCIATION_OF_LICENSING_FACTORS_WITH_THE_PRE_REPLICATIVE_COMPLEX	0.0291047	0.738272	0.902172	0.00687819	0.0339363	0.696823	0.89407	-0.00156548	0.985661	0.9951
REACTOME_P38MAPK_EVENTS	0.0270823	0.735387	0.902172	0.0034382	0.00737741	0.926646	0.976302	0.0998246	0.21286	0.5496
REACTOME_MICRORNA_MIRNA_BIOGENESIS	0.0287437	0.730357	0.902172	0.00647422	0.0764195	0.359507	0.722445	-0.00858053	0.918055	0.971729
REACTOME_G_ALPHA_Z_SIGNALLING_EVENTS	0.015476	0.738397	0.902172	0.00247131	0.0199362	0.667029	0.879735	0.0581835	0.209255	0.54875
REACTOME_IL_2_SIGNALING	0.0154442	0.735728	0.902172	0.00107505	0.00198598	0.965382	0.99318	-0.0114299	0.802752	0.915482
REACTOME_AUTODEGRADATION_OF_CDH1_BY_CDH1_APC_C	0.0140337	0.731839	0.902172	0.00264213	0.0151384	0.714393	0.894965	0.0342931	0.402379	0.707049
REACTOME_IL_RECEPTOR_SHC_SIGNALING	0.0188321	0.739819	0.903046	0.00165119	0.0116999	0.836541	0.9436	-0.0291295	0.607476	0.828377
PID_ERBB2_ERBB3_PATHWAY	0.0145606	0.741504	0.904238	0.00153406	-0.00325993	0.941128	0.983333	-0.00233646	0.957787	0.992866
REACTOME_KERATAN_SULFATE_BIOSYNTHESIS	0.0184736	0.744598	0.906507	0.00175471	0.012852	0.820707	0.93718	-0.023722	0.675712	0.852159
REACTOME_GPVI_MEDIATED_ACTIVATION_CASCADE	0.0174318	0.745492	0.906507	0.00132184	-0.00770495	0.885919	0.962924	0.0362681	0.499466	0.768929
REACTOME_ADP_SIGNALLING_THROUGH_P2RY12	0.0234978	0.744987	0.906507	0.00371235	0.0121536	0.866402	0.954282	0.0591274	0.413105	0.715111
BIOCARTA_IL3_PATHWAY	0.024836	0.747744	0.906642	0.00255019	-0.000621651	0.993577	0.996772	0.00355566	0.963275	0.992866
BIOCARTA_TNFR2_PATHWAY	0.0212596	0.754973	0.909778	0.00224964	0.0085643	0.899951	0.969762	0.0433568	0.52447	0.782176
REACTOME_SIGNALING_BY_NODAL	0.0218444	0.755301	0.909778	0.00370678	0.0216864	0.757015	0.91549	-0.0503856	0.472229	0.755378
KEGG_STEROID_BIOSYNTHESIS	0.0216985	0.76391	0.909857	0.00570829	0.0359398	0.618852	0.855997	0.00308131	0.965979	0.993974
BIOCARTA_IL22BP_PATHWAY	0.0219665	0.761082	0.909857	0.00192086	0.0226904	0.753461	0.91549	0.0326757	0.651056	0.840312
BIOCARTA_PAR1_PATHWAY	0.0146172	0.761795	0.909857	0.000919356	0.00860032	0.858449	0.950997	0.00494153	0.91838	0.971729
PID_CD40_PATHWAY	0.0157569	0.761652	0.909857	0.000796293	0.0125391	0.809268	0.934656	0.0140681	0.786542	0.905743
PID_AJDISS_2PATHWAY	0.0131984	0.759727	0.909857	0.0010871	0.00986697	0.819148	0.936378	0.0165757	0.700905	0.862257
REACTOME_RAP1_SIGNALLING	0.0232263	0.763589	0.909857	0.0025969	0.00800266	0.917462	0.972236	0.0242503	0.753497	0.885528
REACTOME_APC_C_CDH1_MEDIATED_DEGRADATION_OF_CDC20_AND_OTHER_APC_C_CDH1_TARGETED_PROTEINS_IN_LATE_MITOSIS_EARLY_G1	0.0115622	0.761182	0.909857	0.00265885	0.0134027	0.726878	0.90327	0.0246293	0.517363	0.779095
KEGG_GLYCOSAMINOGLYCAN_BIOSYNTHESIS_CHONDROITIN_SULFATE	0.0182331	0.767355	0.911312	0.0025054	0.0022309	0.971125	0.993381	0.0012775	0.983463	0.9951
REACTOME_G_BETA_GAMMA_SIGNALLING_THROUGH_PLC_BETA	0.0218194	0.769942	0.911312	0.00412315	0.0087573	0.906562	0.971268	0.0816146	0.273998	0.604211
REACTOME_INTERACTION_BETWEEN_L1_AND_ANKYRINS	0.0184569	0.769828	0.911312	0.002744	0.00949051	0.880406	0.96105	0.00854618	0.892229	0.961617
BIOCARTA_IGF1MTOR_PATHWAY	0.0192402	0.77169	0.912322	0.00261265	0.0155739	0.814308	0.934656	0.0312167	0.637794	0.839203
REACTOME_SPHINGOLIPID_DE_NOVO_BIOSYNTHESIS	0.0152084	0.773338	0.913425	0.00274424	0.0100999	0.848315	0.948215	-0.0224038	0.671366	0.851671
REACTOME_INHIBITION_OF_INSULIN_SECRETION_BY_ADRENALINE_NORADRENALINE	0.0183049	0.777012	0.914112	0.00515789	0.0031526	0.961097	0.99215	0.0618589	0.338526	0.658671
REACTOME_MTORC1_MEDIATED_SIGNALLING	0.024163	0.781467	0.915412	0.0031534	0.0329672	0.705069	0.894965	0.0829146	0.34114	0.658671
BIOCARTA_HIVNEF_PATHWAY	0.010585	0.784517	0.916465	0.00104687	0.00586584	0.879559	0.96105	0.0276	0.475862	0.757458
PID_EPHB_FWD_PATHWAY	0.012846	0.784346	0.916465	0.00234086	0.00433204	0.926471	0.976302	0.0366292	0.435205	0.72863
KEGG_COLORECTAL_CANCER	0.0100283	0.786937	0.916853	0.00107094	0.00333589	0.928358	0.976495	0.0129375	0.727315	0.876491
BIOCARTA_SPPA_PATHWAY	0.0166784	0.786691	0.916853	0.00138185	0.0109704	0.858725	0.950997	0.00632057	0.918318	0.971729
BIOCARTA_ARAP_PATHWAY	0.0194245	0.788026	0.917211	0.00319381	0.0319167	0.658641	0.873586	0.0100181	0.889711	0.960333
PID_BETA_CATENIN_NUC_PATHWAY	0.00865747	0.793393	0.920761	0.000866422	0.00865935	0.793351	0.925459	0.0102694	0.756052	0.88763
REACTOME_GASTRIN_CREB_SIGNALLING_PATHWAY_VIA_PKC_AND_MAPK	0.0054787	0.793958	0.920761	0.000452803	-0.00030367	0.98845	0.996772	0.0256918	0.220677	0.555606
REACTOME_ACTIVATION_OF_THE_AP1_FAMILY_OF_TRANSCRIPTION_FACTORS	0.0234912	0.797055	0.921762	0.00408917	0.00231561	0.979776	0.994782	-0.00540441	0.952823	0.992866
REACTOME_BIOSYNTHESIS_OF_THE_N_GLYCAN_PRECURSOR_DOLICHOL_LIPID_LINKED_OLIGOSACCHARIDE_LLO_AND_TRANSFER_TO_A_NASCENT_PROTEIN	0.014057	0.800583	0.923416	0.00178717	0.00419026	0.93998	0.983333	-0.0169084	0.761258	0.888831
BIOCARTA_IL5_PATHWAY	0.0225854	0.804719	0.926978	0.00308699	0.0433472	0.635125	0.86719	2.45098e-05	0.999786	0.999786
BIOCARTA_MEF2D_PATHWAY	0.0178243	0.805122	0.926978	0.00233071	0.0346371	0.631621	0.865767	-0.00181659	0.979939	0.9951
REACTOME_PROSTACYCLIN_SIGNALLING_THROUGH_PROSTACYCLIN_RECEPTOR	0.0186335	0.809325	0.929306	0.00419223	0.00902707	0.906942	0.971268	0.0704827	0.361389	0.672658
REACTOME_IRON_UPTAKE_AND_TRANSPORT	0.0111002	0.817943	0.935839	0.0019213	0.0149166	0.757069	0.91549	0.0143089	0.766671	0.8927
PID_REG_GR_PATHWAY	0.0074253	0.818929	0.936128	0.000551172	0.0135473	0.676193	0.88225	-0.012775	0.69369	0.862063
REACTOME_P130CAS_LINKAGE_TO_MAPK_SIGNALING_FOR_INTEGRINS	0.0175313	0.820406	0.936978	0.00468624	0.0256716	0.73956	0.910309	0.0542283	0.482534	0.762367
BIOCARTA_RAS_PATHWAY	0.01426	0.82115	0.936991	0.00136884	-0.00598524	0.924406	0.976302	0.0330657	0.600143	0.82544
BIOCARTA_CARM1_PATHWAY	0.0187645	0.821983	0.937104	0.00148409	0.0130004	0.876127	0.95946	-0.0233002	0.779953	0.902396
REACTOME_FGFR1_LIGAND_BINDING_AND_ACTIVATION	0.0171201	0.824549	0.939192	0.00265352	0.0225458	0.770318	0.916636	0.00594654	0.938619	0.984161
PID_THROMBIN_PAR1_PATHWAY	0.00990236	0.826588	0.940112	0.00156701	-0.00259921	0.954143	0.989011	0.0350192	0.438479	0.729063
BIOCARTA_P38MAPK_PATHWAY	0.00961669	0.837677	0.948229	0.00177938	0.00865115	0.853781	0.948215	0.0101127	0.82943	0.926557
REACTOME_PROLONGED_ERK_ACTIVATION_EVENTS	0.0140165	0.836978	0.948229	0.00226704	0.000408797	0.995212	0.996772	0.0275665	0.685719	0.859677
REACTOME_INFLUENZA_VIRAL_RNA_TRANSCRIPTION_AND_REPLICATION	0.00756079	0.837232	0.948229	0.00235991	0.0181811	0.624112	0.857651	0.035511	0.338508	0.658671
KEGG_DORSO_VENTRAL_AXIS_FORMATION	0.0117362	0.842369	0.951274	0.00114042	0.00159548	0.978432	0.994778	0.0114525	0.846131	0.938578
REACTOME_TRANSPORT_OF_GLUCOSE_AND_OTHER_SUGARS_BILE_SALTS_AND_ORGANIC_ACIDS_METAL_IONS_AND_AMINE_COMPOUNDS	0.0060513	0.844088	0.951274	0.00210189	0.012756	0.678458	0.883347	-0.0163047	0.596181	0.82116
BIOCARTA_SRCRPTP_PATHWAY	0.0164723	0.850004	0.956255	0.00646805	0.0110114	0.899401	0.969762	0.0329307	0.705381	0.864769
SIG_IL4RECEPTOR_IN_B_LYPHOCYTES	0.010386	0.851953	0.956762	0.00130989	-0.0116022	0.834853	0.942528	0.00436412	0.937494	0.98379
BIOCARTA_STEM_PATHWAY	0.0138494	0.852737	0.956802	0.00271143	0.0404438	0.587764	0.844003	0.00139383	0.985095	0.9951
PID_SMAD2_3PATHWAY	0.0132687	0.854276	0.956965	0.00321658	0.0117551	0.870743	0.955201	-0.031411	0.663715	0.847969
REACTOME_THE_ACTIVATION_OF_ARYLSULFATASES	0.0151626	0.855734	0.956965	0.00408283	0.0216708	0.794986	0.925459	0.029327	0.725105	0.876232
REACTOME_FRS2_MEDIATED_CASCADE	0.00869868	0.856847	0.956965	0.00172869	0.00210996	0.965099	0.99318	-0.00899858	0.851968	0.938858
KEGG_GLUTATHIONE_METABOLISM	0.00729222	0.86007	0.957311	0.00175186	0.0141912	0.731549	0.90593	0.0130815	0.751823	0.885528
BIOCARTA_GLEEVEC_PATHWAY	0.0103365	0.863854	0.957311	0.00186256	-0.0193169	0.748632	0.91549	0.0114179	0.849772	0.938578
BIOCARTA_PTEN_PATHWAY	0.0114774	0.866201	0.957311	0.00442293	-0.0195678	0.77392	0.918356	0.0216579	0.750534	0.885528
BIOCARTA_TRKA_PATHWAY	0.0137647	0.868908	0.957311	0.00382383	-0.013797	0.868604	0.954493	0.00289082	0.972349	0.9951
ST_GA12_PATHWAY	0.0101872	0.865801	0.957311	0.00167014	-0.00704007	0.907029	0.971268	0.0274441	0.648918	0.840312
PID_PDGFRA_PATHWAY	0.0108942	0.859697	0.957311	0.00234076	-0.0138037	0.822783	0.93718	0.00288414	0.962676	0.992866
REACTOME_ACTIVATION_OF_NF_KAPPAB_IN_B_CELLS	0.00674768	0.862843	0.957311	0.00214112	0.00834223	0.832386	0.940574	0.0320697	0.411614	0.714997
REACTOME_SIGNALING_BY_NOTCH1	0.00603628	0.867672	0.957311	0.00149444	-0.0107552	0.766566	0.916636	-0.00339255	0.925393	0.974979
REACTOME_PERK_REGULATED_GENE_EXPRESSION	0.00963635	0.862528	0.957311	0.00185169	0.00984244	0.859618	0.951162	0.0434706	0.434726	0.72863
PID_TRAIL_PATHWAY	0.00892305	0.872613	0.959725	0.00187225	0.00939681	0.865913	0.954282	0.0208018	0.708561	0.867834
REACTOME_DOWNREGULATION_OF_TGF_BETA_RECEPTOR_SIGNALING	0.0109668	0.8721	0.959725	0.00490776	0.0165767	0.807739	0.934656	0.0275938	0.685424	0.859677
ST_ERK1_ERK2_MAPK_PATHWAY	0.00722125	0.889446	0.962436	0.00119109	-0.0119804	0.817613	0.93546	-0.00184892	0.971609	0.9951
ST_INTERLEUKIN_4_PATHWAY	0.00851503	0.880641	0.962436	0.000963299	-0.0075686	0.893824	0.966419	-0.0183949	0.74565	0.883554
PID_MET_PATHWAY	0.00484226	0.884282	0.962436	0.000750235	-0.00925571	0.780862	0.923633	0.0347268	0.29659	0.625638
PID_P38_ALPHA_BETA_PATHWAY	0.00720743	0.891432	0.962436	0.00146781	-0.0175223	0.740017	0.910309	0.016638	0.752698	0.885528
PID_CDC42_PATHWAY	0.00482425	0.891646	0.962436	0.000965468	-0.00832267	0.814205	0.934656	0.0101022	0.775451	0.899851
PID_INTEGRIN_A9B1_PATHWAY	0.00835909	0.885064	0.962436	0.0031391	0.0160574	0.781258	0.923633	0.0225046	0.69715	0.862063
PID_IL6_7_PATHWAY	0.00604355	0.88741	0.962436	0.00186138	-0.000743721	0.986099	0.996772	0.0071554	0.866875	0.947912
REACTOME_TGF_BETA_RECEPTOR_SIGNALING_IN_EMT_EPITHELIAL_TO_MESENCHYMAL_TRANSITION	0.0124878	0.885999	0.962436	0.00180082	-0.000829889	0.992398	0.996772	0.028329	0.745002	0.883554
REACTOME_MHC_CLASS_II_ANTIGEN_PRESENTATION	0.00492808	0.87924	0.962436	0.000542696	-0.00236036	0.941989	0.983333	0.000906984	0.977692	0.9951
REACTOME_AMINE_DERIVED_HORMONES	0.0101748	0.891525	0.962436	0.00276297	0.0299661	0.687946	0.88718	-0.0286818	0.70066	0.862257
REACTOME_ORGANIC_CATION_ANION_ZWITTERION_TRANSPORT	0.0111249	0.889583	0.962436	0.00442481	0.0394798	0.622239	0.855997	-0.0270697	0.735506	0.880535
REACTOME_CALNEXIN_CALRETICULIN_CYCLE	0.013022	0.881158	0.962436	0.00366719	0.0100645	0.908011	0.971268	-0.0497554	0.567846	0.801776
REACTOME_G2_M_CHECKPOINTS	0.00680337	0.880356	0.962436	0.0026742	0.0062048	0.890813	0.964733	-0.000832611	0.985303	0.9951
PID_HIF2PATHWAY	0.00674806	0.893398	0.962944	0.00134124	0.0154233	0.759391	0.91549	-0.0212479	0.673064	0.851671
REACTOME_G_ALPHA_Q_SIGNALLING_EVENTS	0.00295371	0.894082	0.962944	0.000503209	-0.000241721	0.991307	0.996772	0.0238735	0.28188	0.611211
REACTOME_MITOTIC_PROMETAPHASE	0.00420114	0.896945	0.964084	0.00206518	0.00705635	0.827782	0.938954	-0.0186001	0.566347	0.801753
PID_ATF2_PATHWAY	0.00483417	0.899747	0.965472	0.000798395	-0.00345797	0.928195	0.976495	0.00255925	0.946825	0.990042
KEGG_RENIN_ANGIOTENSIN_SYSTEM	0.0087493	0.90066	0.965641	0.00409923	0.0136582	0.8455	0.948215	0.000241701	0.997249	0.998107
SA_MMP_CYTOKINE_CONNECTION	0.00907235	0.903216	0.967308	0.00272549	0.0229047	0.758845	0.91549	0.0331371	0.656937	0.84485
BIOCARTA_PARKIN_PATHWAY	0.0100257	0.912606	0.969722	0.00171188	0.0409704	0.653788	0.873519	0.0619118	0.497928	0.768929
ST_DIFFERENTIATION_PATHWAY_IN_PC12_CELLS	0.00469907	0.913291	0.969722	0.00142313	-0.0044748	0.917414	0.972236	-0.00077265	0.985715	0.9951
PID_RAS_PATHWAY	0.00577576	0.912902	0.969722	0.00186051	-0.00588717	0.911228	0.971268	-0.0116052	0.826046	0.926557
BIOCARTA_PLCE_PATHWAY	0.00969519	0.915476	0.970936	0.00241558	0.00121294	0.989406	0.996772	-0.0416176	0.648684	0.840312
REACTOME_METABOLISM_OF_LIPIDS_AND_LIPOPROTEINS	0.00137438	0.920744	0.974905	0.000636464	0.00788355	0.5682	0.837276	-0.0118564	0.390729	0.694811
KEGG_BETA_ALANINE_METABOLISM	0.00531613	0.931263	0.975166	0.0047965	0.0131233	0.831384	0.940574	-0.0267383	0.664409	0.847969
BIOCARTA_CFTR_PATHWAY	0.00724557	0.933705	0.975166	0.00382754	0.010822	0.901122	0.970206	-0.0367859	0.672786	0.851671
BIOCARTA_GATA3_PATHWAY	0.0058958	0.937014	0.975166	0.00279396	0.00832414	0.911164	0.971268	-0.0824402	0.269173	0.603395
BIOCARTA_RACCYCD_PATHWAY	0.00494481	0.931856	0.975166	0.00310892	-0.00655211	0.909789	0.971268	0.0332056	0.565817	0.801753
BIOCARTA_RHO_PATHWAY	0.00459065	0.93188	0.975166	0.00224168	0.00803525	0.881064	0.96105	0.0497164	0.354579	0.665815
PID_TXA2PATHWAY	0.00336866	0.931893	0.975166	0.00143385	-0.00914748	0.816482	0.935004	0.00362111	0.926803	0.974979
REACTOME_PYRIMIDINE_CATABOLISM	0.00688941	0.936957	0.975166	0.00397459	0.0283666	0.744675	0.912459	-0.0485744	0.577072	0.810316
REACTOME_SPRY_REGULATION_OF_FGF_SIGNALING	0.00736932	0.935702	0.975166	0.00251227	-0.0216614	0.812557	0.934656	-0.0330515	0.717489	0.873467
REACTOME_KERATAN_SULFATE_DEGRADATION	0.00798014	0.927002	0.975166	0.00303543	0.0320649	0.712778	0.894965	0.0372093	0.669242	0.849884
REACTOME_ENOS_ACTIVATION_AND_REGULATION	0.00581894	0.935803	0.975166	0.00400401	0.00276637	0.969455	0.993381	0.0839312	0.245327	0.574731
REACTOME_MEIOTIC_SYNAPSIS	0.00309048	0.938082	0.975483	0.00205664	0.0120763	0.761475	0.91549	0.0166605	0.678268	0.852852
BIOCARTA_NUCLEARRS_PATHWAY	0.005905	0.939047	0.975693	0.00259605	8.75565e-06	0.99991	0.99991	-0.0189606	0.806044	0.916355
BIOCARTA_ATM_PATHWAY	0.00400172	0.950631	0.984241	0.0022404	0.0158182	0.806658	0.934641	-0.00841718	0.896384	0.964284
BIOCARTA_MCM_PATHWAY	0.00404362	0.952666	0.984241	0.00325751	-0.00247322	0.971038	0.993381	-0.0347972	0.609479	0.828385
BIOCARTA_NFAT_PATHWAY	0.00262821	0.94934	0.984241	0.00061265	-0.0042874	0.917451	0.972236	-0.0320939	0.442522	0.73085
BIOCARTA_AKAPCENTROSOME_PATHWAY	0.00497939	0.95239	0.984241	0.00401625	0.0102226	0.902444	0.970223	-0.0387248	0.642413	0.840079
REACTOME_CD28_CO_STIMULATION	0.00329693	0.950215	0.984241	0.00192925	-0.00455662	0.931235	0.978071	-0.0134111	0.799515	0.913424
KEGG_REGULATION_OF_ACTIN_CYTOSKELETON	0.00105015	0.959378	0.984807	0.000568231	-0.00526941	0.79828	0.928287	0.024813	0.229929	0.560743
REACTOME_DOWNSTREAM_SIGNALING_EVENTS_OF_B_CELL_RECEPTOR_BCR	0.0016796	0.957199	0.984807	0.00139329	-0.000758661	0.980771	0.994782	0.0221238	0.479611	0.760577
REACTOME_POL_SWITCHING	0.00411651	0.95903	0.984807	0.00379369	-0.0174088	0.828014	0.938954	0.0137635	0.863627	0.945983
REACTOME_N_GLYCAN_TRIMMING_IN_THE_ER_AND_CALNEXIN_CALRETICULIN_CYCLE	0.00433316	0.956876	0.984807	0.00310389	-0.0188701	0.813831	0.934656	-0.0602267	0.4523	0.739336
BIOCARTA_INFLAM_PATHWAY	0.00263592	0.960854	0.984842	0.00191032	0.0163055	0.76142	0.91549	-0.00478845	0.928952	0.976434
BIOCARTA_FAS_PATHWAY	0.00258518	0.960953	0.984842	0.00113208	-0.000364366	0.994494	0.996772	0.0253767	0.630818	0.835195
KEGG_PENTOSE_AND_GLUCURONATE_INTERCONVERSIONS	0.00273478	0.967102	0.985647	0.00451838	-0.0030244	0.96362	0.99315	-0.03666	0.580348	0.81208
KEGG_TAURINE_AND_HYPOTAURINE_METABOLISM	0.00358673	0.96868	0.985647	0.00281337	0.0171894	0.85074	0.948215	0.0101103	0.911872	0.968057
KEGG_ALPHA_LINOLENIC_ACID_METABOLISM	0.00307696	0.963972	0.985647	0.00275434	0.0125365	0.853987	0.948215	0.0106109	0.876217	0.953223
KEGG_VASCULAR_SMOOTH_MUSCLE_CONTRACTION	0.0012409	0.965095	0.985647	0.000312614	-0.00552575	0.845496	0.948215	0.0086411	0.76057	0.888831
BIOCARTA_CHEMICAL_PATHWAY	0.00254661	0.967041	0.985647	0.00314764	-0.000574456	0.992563	0.996772	0.0475019	0.440869	0.729063
PID_THROMBIN_PAR4_PATHWAY	0.00317451	0.968399	0.985647	0.00462137	-0.0180593	0.821693	0.93718	0.040291	0.615103	0.83166
REACTOME_RECRUITMENT_OF_NUMA_TO_MITOTIC_CENTROSOMES	0.00362345	0.968359	0.985647	0.00101933	0.0250184	0.784178	0.925374	0.000306373	0.997324	0.998107
BIOCARTA_EIF2_PATHWAY	0.00292717	0.973191	0.986222	0.00436808	0.0273195	0.753789	0.91549	-0.0135879	0.876034	0.953223
REACTOME_SIGNALING_BY_FGFR1_MUTANTS	0.00184472	0.972598	0.986222	0.00204758	0.000679661	0.989903	0.996772	0.0022428	0.966688	0.993974
REACTOME_GRB2_SOS_PROVIDES_LINKAGE_TO_MAPK_SIGNALING_FOR_INTERGRINS_	0.00237949	0.975418	0.986222	0.00406535	-0.00734599	0.924214	0.976302	0.0348911	0.651395	0.840312
REACTOME_GLOBAL_GENOMIC_NER_GG_NER	0.0017261	0.973072	0.986222	0.0018047	-0.00729423	0.886568	0.962924	0.00973058	0.849079	0.938578
BIOCARTA_IL4_PATHWAY	0.00233728	0.978592	0.987868	0.0026846	0.018731	0.829732	0.940069	-0.0227022	0.794373	0.911717
BIOCARTA_NGF_PATHWAY	0.00151125	0.9823	0.990047	0.00303626	-0.0407843	0.549368	0.829469	-0.0031417	0.963215	0.992866
REACTOME_NONSENSE_MEDIATED_DECAY_ENHANCED_BY_THE_EXON_JUNCTION_COMPLEX	0.000557551	0.987255	0.992692	0.00189082	-0.00132832	0.96986	0.993381	0.0279924	0.425893	0.723753
BIOCARTA_BARR_MAPK_PATHWAY	0.00118363	0.988677	0.99334	0.00292148	-0.0161663	0.846301	0.948215	-0.00140966	0.986514	0.9951
BIOCARTA_PPARA_PATHWAY	0.000176805	0.996388	0.99795	0.000605122	-0.00382474	0.921994	0.975421	-0.0181561	0.642049	0.840079
REACTOME_EXTRACELLULAR_MATRIX_ORGANIZATION	0.000175604	0.995601	0.99795	0.000618501	-0.00181341	0.954597	0.989011	0.00749008	0.814081	0.921806
