# Supplementary material for: Pan-mammalian analysis of molecular constraints underlying extended lifespan
Source: eLife. 2020 Feb 11;9:e51089. doi: 10.7554/eLife.51089 (PMC7012612; doi:10.7554/eLife.51089)
Supplement: Supplementary file 6. — Results from branch-site model tests on genes to detect genes under positive selection in species at both extremes of the 3L and ELL phenotypes. [file elife-51089-supp6.xlsx]

## Sheet: Full Branch-Site Model Results
Gene	M1lnL	bs1lnL	bs2lnL	LRTbs1m1	LRTbs2bs1	chisqp	Site class 0	Site class1	Site class 2A	Site class 2B	Omega0	Omega1	Omega2	Ssite class 0	Ssite class 1	Ssite class 2A	Ssite class 2B	Oomega0	Oomga1	Oomega2
ABCB4	-34713.9	-34657.1	-34657.1	113.602	0	1	0.675	0.115	0.179	0.031	0.062	1	1	0.675	0.115	0.179	0.031	0.062	1	1
ABCF3	-14876.9	-14855.7	-14855.7	42.412	0	1	0.881	0.042	0.074	0.004	0.016	1	1	0.881	0.042	0.074	0.004	0.016	1	1
ACTRT2	-13061.1	-13039.2	-13039.2	43.789	0	1	0.821	0.07	0.1	0.009	0.053	1	1	0.821	0.07	0.1	0.009	0.053	1	1
AK5	-14053.9	-14050.6	-14050.6	6.599	0	1	0.825	0.137	0.032	0.005	0.043	1	1	0.825	0.137	0.032	0.005	0.043	1	1
AKAP13	-107442	-107422	-107422	40.138	0	1	0.55	0.408	0.024	0.018	0.079	1	1	0.55	0.408	0.024	0.018	0.079	1	1
ALPK2	-101899	-101898	-101898	1.885	0.907	0.340912	0.342	0.638	0.007	0.013	0.139	1	1	0.343	0.641	0.006	0.01	0.14	1	2.95
ANGPT1	-9219.08	-9214.16	-9213.13	9.856	2.058	0.151409	0.896	0.044	0.057	0.003	0.035	1	1	0.917	0.045	0.036	0.002	0.035	1	2.199
APOLD1	-7101.66	-7100.73	-7100.73	1.867	0	1	0.734	0.162	0.085	0.019	0.082	1	1	0.734	0.162	0.085	0.019	0.082	1	1
ARHGEF25	-15126.3	-15125.8	-15125.8	0.896	0	1	0.772	0.217	0.008	0.002	0.055	1	1	0.772	0.217	0.008	0.002	0.055	1	1
ASB6	-10837.5	-10834.1	-10834.1	6.816	0	1	0.934	0.052	0.014	0.001	0.03	1	1	0.934	0.052	0.014	0.001	0.03	1	1
ATP2B1	-18631.2	-18631.2	-18631.2	0.007	0	1	0.979	0.02	0.001	0	0.009	1	1	0.979	0.02	0.001	0	0.009	1	1
B3GALNT2	-13951.1	-13947.9	-13947.8	6.263	0.257	0.612189	0.816	0.157	0.023	0.004	0.056	1	1	0.82	0.158	0.018	0.004	0.056	1	1.364
BHLHE40	-9400.75	-9400.75	-9400.75	0	0	1	0.886	0.114	0	0	0.045	1	1	0.886	0.114	0	0	0.045	1	1
BRWD1	-65507	-65456.7	-65456.7	100.763	0	1	0.74	0.212	0.037	0.011	0.061	1	1	0.74	0.212	0.037	0.011	0.061	1	1
C10orf12	-44459.6	-44453.7	-44453.7	11.815	0	1	0.512	0.438	0.027	0.023	0.113	1	1	0.512	0.438	0.027	0.023	0.113	1	1
C18orf63	-27954.7	-27946.6	-27946.3	16.343	0.566	0.451853	0.416	0.47	0.053	0.06	0.17	1	1	0.432	0.485	0.039	0.044	0.173	1	1.366
C2orf81	-28237.7	-28231.9	-28227.7	11.523	8.495	0.00356124	0.413	0.508	0.036	0.044	0.136	1	1	0.419	0.505	0.035	0.042	0.142	1	3.033
C3AR1	-19320.6	-19317.7	-19317.7	5.818	0	1	0.446	0.493	0.029	0.032	0.11	1	1	0.446	0.493	0.029	0.032	0.11	1	1
CA14	-10600.8	-10600.7	-10600.7	0.258	0	1	0.756	0.234	0.008	0.002	0.127	1	1	0.756	0.234	0.008	0.002	0.127	1	1
CASP10	-19141.5	-19141.2	-19136.9	0.458	8.721	0.00314565	0.471	0.498	0.015	0.016	0.146	1	1	0.467	0.491	0.02	0.021	0.147	1	16.724
CCDC168	-306791	-306738	-306701	107.251	73.496	1.0084e-17	0.265	0.454	0.104	0.177	0.366	1	1	0.311	0.526	0.061	0.102	0.377	1	2.11
CCNB3	-64965.7	-64957	-64931.3	17.323	51.545	6.99747e-13	0.242	0.575	0.054	0.129	0.235	1	1	0.236	0.552	0.063	0.148	0.241	1	2.405
CCRL1	-9939.95	-9935.12	-9935.12	9.67	0	1	0.819	0.145	0.031	0.005	0.079	1	1	0.819	0.145	0.031	0.005	0.079	1	1
CD101	-41866.3	-41855.4	-41855.4	21.711	0	1	0.534	0.347	0.073	0.047	0.19	1	1	0.534	0.347	0.073	0.047	0.19	1	1
CDH19	-27565.6	-27557.7	-27557.7	15.844	0	1	0.679	0.272	0.035	0.014	0.116	1	1	0.679	0.272	0.035	0.014	0.116	1	1
CEP164	-54008.8	-54002.3	-54001.4	12.924	1.875	0.170904	0.587	0.354	0.037	0.022	0.16	1	1	0.604	0.362	0.021	0.013	0.161	1	1.82
CEP350	-85205.4	-85199.1	-85199.1	12.685	0	1	0.718	0.259	0.017	0.006	0.091	1	1	0.718	0.259	0.017	0.006	0.091	1	1
CKM	-7424.44	-7399.26	-7399.26	50.374	0	1	0.91	0.014	0.075	0.001	0.009	1	1	0.91	0.014	0.075	0.001	0.009	1	1
COL28A1	-33412.1	-33287.8	-33281.9	248.534	11.839	0.00058003	0.264	0.127	0.411	0.198	0.082	1	1	0.353	0.168	0.324	0.154	0.082	1	1.702
CRIM1	-23990.4	-23981.8	-23981.8	17.27	0	1	0.891	0.079	0.028	0.002	0.057	1	1	0.891	0.079	0.028	0.002	0.057	1	1
DDX31	-30141.4	-30140.1	-30140.1	2.648	0	1	0.581	0.404	0.009	0.006	0.075	1	1	0.581	0.404	0.009	0.006	0.075	1	1
DHCR24	-10443.2	-10438.9	-10438.9	8.739	0	1	0.938	0.042	0.019	0.001	0.013	1	1	0.938	0.042	0.019	0.001	0.013	1	1
DMPK	-15453.2	-15446.4	-15446.4	13.671	0	1	0.776	0.153	0.059	0.012	0.056	1	1	0.776	0.153	0.059	0.012	0.056	1	1
DNAJA4	-9782.53	-9782.34	-9782.34	0.388	0	1	0.855	0.132	0.011	0.002	0.04	1	1	0.855	0.132	0.011	0.002	0.04	1	1
DNMBP	-53411.9	-53395.1	-53395.1	33.69	0	1	0.643	0.291	0.045	0.02	0.067	1	1	0.643	0.291	0.045	0.02	0.067	1	1
DRAM1	-5473.55	-5468.73	-5468.73	9.639	0	1	0.841	0.058	0.094	0.007	0.045	1	1	0.841	0.058	0.094	0.007	0.045	1	1
DRC1	-25515.5	-25505.6	-25505.6	19.64	0	1	0.711	0.23	0.045	0.014	0.079	1	1	0.711	0.23	0.045	0.014	0.079	1	1
EFCAB6	-63314.7	-63312.3	-63312.3	4.654	0	1	0.63	0.338	0.021	0.011	0.15	1	1	0.63	0.338	0.021	0.011	0.15	1	1
ELF4	-18282.5	-18256.5	-18256.5	51.942	0	1	0.666	0.207	0.097	0.03	0.08	1	1	0.666	0.207	0.097	0.03	0.08	1	1
ENTHD1	-24541.3	-24539.9	-24539.9	2.801	0	1	0.454	0.478	0.033	0.035	0.185	1	1	0.454	0.478	0.033	0.035	0.185	1	1
ESCO2	-19434.8	-19429.3	-19429.2	11.051	0.159	0.690079	0.53	0.403	0.038	0.029	0.109	1	1	0.539	0.408	0.03	0.023	0.11	1	1.289
FAM186B	-37466.7	-37458.5	-37458.5	16.464	0	1	0.494	0.401	0.058	0.047	0.191	1	1	0.494	0.401	0.058	0.047	0.191	1	1
FBXO36	-6475.04	-6472.98	-6472.69	4.107	0.575	0.448279	0.686	0.254	0.043	0.016	0.118	1	1	0.706	0.259	0.026	0.009	0.12	1	1.781
FKSG29	-6247.06	-6247.06	-6245.08	0	3.944	0.0470388	0.244	0.756	0	0	0.533	1	1	0.21	0.57	0.059	0.161	0.549	1	2.779
FOPNL	-5632.33	-5632.03	-5632.03	0.604	0	1	0.63	0.352	0.011	0.006	0.048	1	1	0.63	0.352	0.011	0.006	0.048	1	1
GCNT7	-15649.1	-15645.6	-15645.6	6.871	0	1	0.672	0.283	0.032	0.013	0.144	1	1	0.672	0.283	0.032	0.013	0.144	1	1
HELLS	-17416.6	-17413.7	-17413.7	5.852	0	1	0.876	0.109	0.013	0.002	0.047	1	1	0.876	0.109	0.013	0.002	0.047	1	1
HEPACAM	-9757.6	-9751.35	-9751.06	12.511	0.58	0.446312	0.88	0.058	0.058	0.004	0.041	1	1	0.9	0.059	0.038	0.002	0.042	1	1.696
IGSF10	-109201	-109153	-109153	95.325	0	1	0.476	0.378	0.082	0.065	0.154	1	1	0.476	0.378	0.082	0.065	0.154	1	1
IL17RC	-28326.4	-28319.9	-28319.9	13.026	0	1	0.652	0.266	0.058	0.024	0.157	1	1	0.652	0.266	0.058	0.024	0.157	1	1
ISG20L2	-10799.1	-10794	-10794	10.264	0	1	0.628	0.313	0.04	0.02	0.065	1	1	0.628	0.313	0.04	0.02	0.065	1	1
KIAA1614	-48845	-48825.3	-48824.5	39.457	1.658	0.197874	0.394	0.374	0.119	0.113	0.222	1	1	0.432	0.404	0.085	0.079	0.225	1	1.433
KIF24	-47149.6	-47149.6	-47149.6	0.051	0	1	0.525	0.471	0.002	0.002	0.098	1	1	0.525	0.471	0.002	0.002	0.098	1	1
KMT2C	-156591	-156495	-156495	193.127	0	1	0.724	0.205	0.056	0.016	0.074	1	1	0.724	0.205	0.056	0.016	0.074	1	1
KNTC1	-65546.2	-65534.6	-65534.6	23.203	0	1	0.808	0.155	0.03	0.006	0.104	1	1	0.808	0.155	0.03	0.006	0.104	1	1
KRT10	-15830.9	-15802.1	-15800.7	57.588	2.747	0.0974371	0.522	0.213	0.188	0.077	0.063	1	1	0.567	0.226	0.148	0.059	0.065	1	1.653
LINS	-30800.4	-30794.9	-30793	11.082	3.858	0.0495093	0.446	0.476	0.038	0.04	0.154	1	1	0.466	0.493	0.02	0.021	0.158	1	2.626
LOC730159	-6899.03	-6893.9	-6893.89	10.262	0.03	0.86249	0.204	0.217	0.281	0.298	0.24	1	1	0.212	0.225	0.273	0.29	0.24	1	1.066
LPAR2	-9084.9	-9068	-9068	33.809	0	1	0.909	0.054	0.034	0.002	0.032	1	1	0.909	0.054	0.034	0.002	0.032	1	1
LRRN1	-17221.6	-17220.1	-17220.1	2.926	0	1	0.95	0.044	0.006	0	0.032	1	1	0.95	0.044	0.006	0	0.032	1	1
MAP3K4	-44731.3	-44708.5	-44708.5	45.623	0	1	0.863	0.111	0.023	0.003	0.038	1	1	0.863	0.111	0.023	0.003	0.038	1	1
MDN1	-154024	-154022	-154022	5.053	0	1	0.777	0.209	0.011	0.003	0.085	1	1	0.777	0.209	0.011	0.003	0.085	1	1
METTL18	-12383.7	-12383.5	-12383.5	0.255	0	1	0.604	0.38	0.01	0.006	0.138	1	1	0.604	0.38	0.01	0.006	0.138	1	1
MFRP	-16303.8	-16299	-16299	9.592	0	1	0.526	0.391	0.047	0.035	0.111	1	1	0.526	0.391	0.047	0.035	0.111	1	1
MPHOSPH9	-34409	-34396.9	-34396.9	24.251	0	1	0.656	0.276	0.048	0.02	0.115	1	1	0.656	0.276	0.048	0.02	0.115	1	1
MYH13	-46786	-46528.2	-46528.2	515.67	0	1	0.669	0.044	0.27	0.018	0.031	1	1	0.669	0.044	0.27	0.018	0.031	1	1
MYH16	-15108.1	-15079.3	-15079.3	57.546	0	1	0.685	0.096	0.193	0.027	0.084	1	1	0.685	0.096	0.193	0.027	0.084	1	1
MYH4	-43221.4	-43055.5	-43055.5	331.644	0	1	0.765	0.061	0.161	0.013	0.017	1	1	0.765	0.061	0.161	0.013	0.017	1	1
MYL1	-3900.82	-3893.08	-3893.08	15.472	0	1	0.858	0.064	0.073	0.005	0.021	1	1	0.858	0.064	0.073	0.005	0.021	1	1
NACA	-30022.7	-30022.7	-30022.7	0	0	1	0.402	0.598	0	0	0.072	1	1	0.402	0.598	0	0	0.072	1	1
NEB	-154551	-154268	-154268	566.71	0	1	0.785	0.087	0.115	0.013	0.037	1	1	0.785	0.087	0.115	0.013	0.037	1	1
NEFL	-10247.5	-10205	-10205	85.167	0	1	0.844	0.04	0.111	0.005	0.02	1	1	0.844	0.04	0.111	0.005	0.02	1	1
NFATC2	-21364.2	-21359.6	-21359.6	9.139	0	1	0.904	0.078	0.017	0.001	0.051	1	1	0.904	0.078	0.017	0.001	0.051	1	1
NRG4	-3086.45	-3086.45	-3086.45	0	0	1	0.587	0.413	0	0	0.114	1	1	0.587	0.413	0	0	0.114	1	1
NUP214	-72236.8	-72223.5	-72223.5	26.601	0	1	0.697	0.265	0.028	0.011	0.103	1	1	0.697	0.265	0.028	0.011	0.103	1	1
OGG1	-13354.2	-13351.7	-13350.6	4.855	2.24	0.134481	0.608	0.356	0.022	0.013	0.071	1	1	0.62	0.362	0.011	0.007	0.073	1	3.067
OMP	-4072.55	-4052.16	-4052.16	40.768	0	1	0.755	0.043	0.191	0.011	0.043	1	1	0.755	0.043	0.191	0.011	0.043	1	1
OR10A4	-8768.79	-8741.69	-8741.69	54.207	0	1	0.664	0.142	0.16	0.034	0.045	1	1	0.664	0.142	0.16	0.034	0.045	1	1
OR51G1	-11136	-11109.9	-11109.9	52.237	0	1	0.601	0.089	0.27	0.04	0.065	1	1	0.601	0.089	0.27	0.04	0.065	1	1
OR51Q1	-11495.7	-11483.4	-11483.4	24.698	0	1	0.698	0.19	0.089	0.024	0.093	1	1	0.698	0.19	0.089	0.024	0.093	1	1
OSBPL2	-14109.5	-14107.3	-14107.3	4.401	0	1	0.868	0.12	0.01	0.001	0.041	1	1	0.868	0.12	0.01	0.001	0.041	1	1
OSGIN2	-12117	-12104.7	-12104.5	24.777	0.263	0.608067	0.804	0.09	0.095	0.011	0.06	1	1	0.824	0.092	0.075	0.008	0.06	1	1.311
PAPPA2	-54643.8	-54639.4	-54639.4	8.953	0	1	0.68	0.288	0.022	0.009	0.091	1	1	0.68	0.288	0.022	0.009	0.091	1	1
PARD6B	-9218.22	-9212.12	-9211.64	12.199	0.95	0.329719	0.915	0.075	0.009	0.001	0.027	1	1	0.916	0.074	0.008	0.001	0.027	1	1.752
PERP	-4730.6	-4712.48	-4712.48	36.239	0	1	0.803	0.096	0.09	0.011	0.03	1	1	0.803	0.096	0.09	0.011	0.03	1	1
PKHD1	-147784	-147782	-147782	4.268	0	1	0.615	0.364	0.013	0.008	0.143	1	1	0.615	0.364	0.013	0.008	0.143	1	1
PP2D1	-29279.8	-29271	-29270.7	17.725	0.488	0.484821	0.467	0.416	0.062	0.055	0.15	1	1	0.475	0.421	0.055	0.049	0.152	1	1.344
PRDM12	-5473.01	-5456.49	-5456.45	33.052	0.074	0.785599	0.957	0.003	0.04	0	0.007	1	1	0.96	0.003	0.037	0	0.007	1	1.143
PRKCH	-13723.4	-13719.6	-13719.6	7.504	0	1	0.947	0.023	0.029	0.001	0.016	1	1	0.947	0.023	0.029	0.001	0.016	1	1
PRR14L	-85697.2	-85697.2	-85692.2	0	10.061	0.00151441	0.336	0.664	0	0	0.178	1	1	0.334	0.659	0.002	0.004	0.178	1	8.047
RCCD1	-10298.4	-10294.5	-10294.3	7.744	0.553	0.457094	0.632	0.315	0.035	0.018	0.092	1	1	0.652	0.324	0.016	0.008	0.095	1	2.288
RGS22	-41377.4	-41368.6	-41368.6	17.8	0	1	0.664	0.294	0.029	0.013	0.099	1	1	0.664	0.294	0.029	0.013	0.099	1	1
RNF207	-18149	-18145.3	-18145.3	7.38	0	1	0.835	0.14	0.022	0.004	0.083	1	1	0.835	0.14	0.022	0.004	0.083	1	1
RNF213	-224826	-224768	-224768	116.804	0	1	0.604	0.328	0.044	0.024	0.105	1	1	0.604	0.328	0.044	0.024	0.105	1	1
RTTN	-74415.6	-74405.8	-74405.8	19.594	0	1	0.746	0.222	0.025	0.007	0.104	1	1	0.746	0.222	0.025	0.007	0.104	1	1
RYR3	-100620	-100576	-100576	88.336	0	1	0.911	0.049	0.037	0.002	0.026	1	1	0.911	0.049	0.037	0.002	0.026	1	1
SALL4	-37051.5	-36996.1	-36996.1	110.796	0	1	0.744	0.155	0.084	0.017	0.08	1	1	0.744	0.155	0.084	0.017	0.08	1	1
SASH1	-35167	-35149	-35147.8	35.849	2.368	0.123846	0.802	0.178	0.017	0.004	0.048	1	1	0.808	0.179	0.01	0.002	0.048	1	1.735
SDCCAG8	-22635.1	-22618.5	-22618.5	33.214	0	1	0.524	0.301	0.111	0.064	0.131	1	1	0.524	0.301	0.111	0.064	0.131	1	1
SEC14L4	-14129.6	-14084.2	-14084.2	90.797	0	1	0.636	0.12	0.205	0.039	0.09	1	1	0.636	0.12	0.205	0.039	0.09	1	1
SETX	-97420.8	-97408.3	-97408.3	25.089	0	1	0.587	0.384	0.017	0.011	0.08	1	1	0.587	0.384	0.017	0.011	0.08	1	1
SIDT1	-21135.1	-21066.3	-21065.6	137.712	1.418	0.233733	0.727	0.084	0.169	0.02	0.061	1	1	0.749	0.086	0.148	0.017	0.061	1	1.251
SLC25A11	-6430.79	-6425.19	-6425.19	11.191	0	1	0.914	0.051	0.033	0.002	0.015	1	1	0.914	0.051	0.033	0.002	0.015	1	1
SLC26A11	-19790.6	-19756.9	-19756.9	67.484	0	1	0.773	0.094	0.118	0.014	0.079	1	1	0.773	0.094	0.118	0.014	0.079	1	1
SLC35G6	-9790.97	-9692.52	-9690.12	196.913	4.787	0.0286753	0.146	0.013	0.773	0.068	0.099	1	1	0.3	0.026	0.619	0.054	0.099	1	1.619
SLC36A4	-11857.2	-11857.2	-11857.2	0	0	1	0.839	0.161	0	0	0.053	1	1	0.839	0.161	0	0	0.053	1	1
SLC4A1	-31583.1	-31549.6	-31549.5	67.144	0.01	0.920344	0.674	0.209	0.089	0.028	0.063	1	1	0.675	0.21	0.088	0.027	0.063	1	1.022
SOCS6	-14855.5	-14828.2	-14828.2	54.473	0	1	0.797	0.092	0.1	0.012	0.037	1	1	0.797	0.092	0.1	0.012	0.037	1	1
SPATA4	-12075.4	-12073.5	-12073.5	3.762	0	1	0.513	0.439	0.026	0.022	0.091	1	1	0.513	0.439	0.026	0.022	0.091	1	1
SSH2	-38146.6	-38146.6	-38146.6	0	0	1	0.681	0.319	0	0	0.054	1	1	0.681	0.319	0	0	0.054	1	1
STX1A	-5437.9	-5436.25	-5436.25	3.309	0	1	0.979	0.004	0.017	0	0.01	1	1	0.979	0.004	0.017	0	0.01	1	1
SULF1	-20702.7	-20698.3	-20698.3	8.708	0	1	0.899	0.077	0.023	0.002	0.026	1	1	0.899	0.077	0.023	0.002	0.026	1	1
TACC2	-123501	-123498	-123492	4.695	12.082	0.00050911	0.355	0.618	0.01	0.017	0.091	1	1	0.359	0.623	0.007	0.012	0.092	1	4.381
TET1	-83295.1	-83279.7	-83279.7	30.683	0	1	0.528	0.372	0.059	0.042	0.199	1	1	0.528	0.372	0.059	0.042	0.199	1	1
TEX36	-7851.33	-7842.41	-7842.41	17.841	0	1	0.501	0.318	0.111	0.07	0.11	1	1	0.501	0.318	0.111	0.07	0.11	1	1
TKT	-15263.8	-15250	-15250	27.603	0	1	0.878	0.059	0.059	0.004	0.027	1	1	0.878	0.059	0.059	0.004	0.027	1	1
TMLHE	-6859.25	-6858.66	-6858.66	1.186	0	1	0.759	0.192	0.039	0.01	0.057	1	1	0.759	0.192	0.039	0.01	0.057	1	1
TSPAN33	-5919.38	-5901.61	-5901.09	35.547	1.039	0.308054	0.761	0.059	0.167	0.013	0.043	1	1	0.801	0.061	0.128	0.01	0.043	1	1.497
TSSK6	-5806.11	-5803.69	-5803.69	4.844	0	1	0.977	0.01	0.013	0	0.008	1	1	0.977	0.01	0.013	0	0.008	1	1
TTF1	-33391.7	-33387.8	-33386.8	7.837	1.98	0.15939	0.497	0.454	0.026	0.024	0.112	1	1	0.502	0.46	0.019	0.018	0.113	1	1.912
UBA5	-8388.6	-8388.6	-8388.6	0	0	1	0.891	0.109	0	0	0.039	1	1	0.891	0.109	0	0	0.039	1	1
VWA3A	-44074.8	-44061.3	-44061.3	27.089	0.005	0.943628	0.628	0.301	0.048	0.023	0.147	1	1	0.629	0.302	0.047	0.022	0.147	1	1.02
WWC3	-33291	-33278.9	-33278.9	24.254	0	1	0.824	0.14	0.031	0.005	0.066	1	1	0.824	0.14	0.031	0.005	0.066	1	1
WWTR1	-9289.39	-9289.39	-9289.39	0	0	1	0.933	0.067	0	0	0.044	1	1	0.933	0.067	0	0	0.044	1	1
XCR1	-12845.3	-12828	-12823.5	34.539	8.911	0.00283458	0.658	0.211	0.1	0.032	0.087	1	1	0.674	0.21	0.088	0.028	0.091	1	2.335
ZNF672	-13367.2	-13308.8	-13308.8	116.818	0	1	0.396	0.084	0.43	0.091	0.048	1	1	0.396	0.084	0.43	0.091	0.048	1	1
ZP4	-19744.1	-19736.5	-19735.8	15.23	1.382	0.239761	0.49	0.33	0.108	0.072	0.168	1	1	0.531	0.355	0.068	0.045	0.169	1	1.767
ZSCAN16	-9335.88	-9333.9	-9332.17	3.97	3.453	0.0631371	0.653	0.283	0.044	0.019	0.154	1	1	0.687	0.299	0.01	0.004	0.158	1	12.294

## Sheet: 3L (PC1) Neg. Cor. BS Results
Gene	M1lnL	bs1lnL	bs2lnL	2(m1-bs1)	2(bs2-bs1)	Acc pval	Pos sel pval	Site class 0	Site class1	Site class 2A	Site class 2B	Omega0	Omega1	Omega2	Ssite class 0	Ssite class 1	Ssite class 2A	Ssite class 2B	Oomega0	Oomga1	Oomega2
AKAP13	-107442	-107422	-107422	40.138	0	2.36641e-10	1	0.55	0.408	0.024	0.018	0.079	1	1	0.55	0.408	0.024	0.018	0.079	1	1
ALPK2	-101899	-101898	-101898	1.884	0.908	0.16988	0.340646	0.342	0.638	0.007	0.013	0.139	1	1	0.343	0.641	0.006	0.01	0.14	1	2.95
ARHGEF25	-15126.3	-15125.8	-15125.8	0.896	0	0.343857	1	0.772	0.217	0.008	0.002	0.055	1	1	0.772	0.217	0.008	0.002	0.055	1	1
ASB6	-10837.5	-10834.1	-10834.1	6.816	0	0.00903447	1	0.934	0.052	0.014	0.001	0.03	1	1	0.934	0.052	0.014	0.001	0.03	1	1
B3GALNT2	-13951.1	-13947.9	-13947.8	6.262	0.258	0.0123355	0.611498	0.816	0.157	0.023	0.004	0.056	1	1	0.82	0.158	0.018	0.004	0.056	1	1.364
BHLHE40	-9400.75	-9400.75	-9400.75	0	0	1	1	0.886	0.114	0	0	0.045	1	1	0.886	0.114	0	0	0.045	1	1
BRWD1	-65507	-65456.7	-65456.7	100.762	0	1.03727e-23	1	0.74	0.212	0.037	0.011	0.061	1	1	0.74	0.212	0.037	0.011	0.061	1	1
C10orf12	-44459.6	-44453.7	-44453.7	11.814	0	0.00058787	1	0.512	0.438	0.027	0.023	0.113	1	1	0.512	0.438	0.027	0.023	0.113	1	1
C18orf63	-27954.7	-27946.6	-27946.3	16.342	0.566	5.28789e-05	0.451853	0.416	0.47	0.053	0.06	0.17	1	1	0.432	0.485	0.039	0.044	0.173	1	1.366
C2orf81	-28237.7	-28231.9	-28227.7	11.522	8.496	0.000687774	0.00355928	0.413	0.508	0.036	0.044	0.136	1	1	0.419	0.505	0.035	0.042	0.142	1	3.033
C3AR1	-19320.6	-19317.7	-19317.7	5.818	0	0.015863	1	0.446	0.493	0.029	0.032	0.11	1	1	0.446	0.493	0.029	0.032	0.11	1	1
CA14	-10600.8	-10600.7	-10600.7	0.258	0	0.611498	1	0.756	0.234	0.008	0.002	0.127	1	1	0.756	0.234	0.008	0.002	0.127	1	1
CASP10	-19141.5	-19141.2	-19136.9	0.458	8.72	0.49856	0.00314738	0.471	0.498	0.015	0.016	0.146	1	1	0.467	0.491	0.02	0.021	0.147	1	16.724
CCDC168	-306791	-306738	-306701	107.252	73.496	3.92015e-25	1.0084e-17	0.265	0.454	0.104	0.177	0.366	1	1	0.311	0.526	0.061	0.102	0.377	1	2.11
CCNB3	-64965.7	-64957	-64931.3	17.322	51.546	3.15513e-05	6.9939e-13	0.242	0.575	0.054	0.129	0.235	1	1	0.236	0.552	0.063	0.148	0.241	1	2.405
CCRL1	-9939.95	-9935.12	-9935.12	9.67	0	0.00187301	1	0.819	0.145	0.031	0.005	0.079	1	1	0.819	0.145	0.031	0.005	0.079	1	1
CD101	-41866.3	-41855.4	-41855.4	21.71	0	3.17134e-06	1	0.534	0.347	0.073	0.047	0.19	1	1	0.534	0.347	0.073	0.047	0.19	1	1
CDH19	-27565.6	-27557.7	-27557.7	15.844	0	6.87843e-05	1	0.679	0.272	0.035	0.014	0.116	1	1	0.679	0.272	0.035	0.014	0.116	1	1
CEP164	-54008.8	-54002.3	-54001.4	12.924	1.876	0.000324396	0.170789	0.587	0.354	0.037	0.022	0.16	1	1	0.604	0.362	0.021	0.013	0.161	1	1.82
CEP350	-85205.4	-85199.1	-85199.1	12.684	0	0.000368798	1	0.718	0.259	0.017	0.006	0.091	1	1	0.718	0.259	0.017	0.006	0.091	1	1
CRIM1	-23990.4	-23981.8	-23981.8	17.27	0	3.24266e-05	1	0.891	0.079	0.028	0.002	0.057	1	1	0.891	0.079	0.028	0.002	0.057	1	1
DDX31	-30141.4	-30140.1	-30140.1	2.648	0	0.10368	1	0.581	0.404	0.009	0.006	0.075	1	1	0.581	0.404	0.009	0.006	0.075	1	1
DRC1	-25515.5	-25505.6	-25505.6	19.64	0	9.34913e-06	1	0.711	0.23	0.045	0.014	0.079	1	1	0.711	0.23	0.045	0.014	0.079	1	1
EFCAB6	-63314.7	-63312.3	-63312.3	4.654	0	0.0309813	1	0.63	0.338	0.021	0.011	0.15	1	1	0.63	0.338	0.021	0.011	0.15	1	1
ELF4	-18282.5	-18256.5	-18256.5	51.942	0	5.71645e-13	1	0.666	0.207	0.097	0.03	0.08	1	1	0.666	0.207	0.097	0.03	0.08	1	1
ENTHD1	-24541.3	-24539.9	-24539.9	2.802	0	0.0941468	1	0.454	0.478	0.033	0.035	0.185	1	1	0.454	0.478	0.033	0.035	0.185	1	1
ESCO2	-19434.8	-19429.3	-19429.2	11.05	0.158	0.000886872	0.691005	0.53	0.403	0.038	0.029	0.109	1	1	0.539	0.408	0.03	0.023	0.11	1	1.289
FAM186B	-37466.7	-37458.5	-37458.5	16.464	0	4.95827e-05	1	0.494	0.401	0.058	0.047	0.191	1	1	0.494	0.401	0.058	0.047	0.191	1	1
FBXO36	-6475.04	-6472.98	-6472.69	4.106	0.576	0.0427313	0.447884	0.686	0.254	0.043	0.016	0.118	1	1	0.706	0.259	0.026	0.009	0.12	1	1.781
FOPNL	-5632.33	-5632.03	-5632.03	0.604	0	0.437056	1	0.63	0.352	0.011	0.006	0.048	1	1	0.63	0.352	0.011	0.006	0.048	1	1
GCNT7	-15649.1	-15645.6	-15645.6	6.872	0	0.00875566	1	0.672	0.283	0.032	0.013	0.144	1	1	0.672	0.283	0.032	0.013	0.144	1	1
HELLS	-17416.6	-17413.7	-17413.7	5.852	0	0.0155594	1	0.876	0.109	0.013	0.002	0.047	1	1	0.876	0.109	0.013	0.002	0.047	1	1
IGSF10	-109201	-109153	-109153	95.324	0	1.61642e-22	1	0.476	0.378	0.082	0.065	0.154	1	1	0.476	0.378	0.082	0.065	0.154	1	1
IL17RC	-28326.4	-28319.9	-28319.9	13.026	0	0.000307196	1	0.652	0.266	0.058	0.024	0.157	1	1	0.652	0.266	0.058	0.024	0.157	1	1
ISG20L2	-10799.1	-10794	-10794	10.266	0	0.00135504	1	0.628	0.313	0.04	0.02	0.065	1	1	0.628	0.313	0.04	0.02	0.065	1	1
KIAA1614	-48845	-48825.3	-48824.5	39.458	1.658	3.35192e-10	0.197874	0.394	0.374	0.119	0.113	0.222	1	1	0.432	0.404	0.085	0.079	0.225	1	1.433
KMT2C	-156591	-156495	-156495	193.128	0	6.60062e-44	1	0.724	0.205	0.056	0.016	0.074	1	1	0.724	0.205	0.056	0.016	0.074	1	1
KNTC1	-65546.2	-65534.6	-65534.6	23.204	0	1.45694e-06	1	0.808	0.155	0.03	0.006	0.104	1	1	0.808	0.155	0.03	0.006	0.104	1	1
LINS	-30800.4	-30794.9	-30793	11.082	3.858	0.000871697	0.0495093	0.446	0.476	0.038	0.04	0.154	1	1	0.466	0.493	0.02	0.021	0.158	1	2.626
LPAR2	-9084.9	-9068	-9068	33.81	0	6.07657e-09	1	0.909	0.054	0.034	0.002	0.032	1	1	0.909	0.054	0.034	0.002	0.032	1	1
LRRN1	-17221.6	-17220.1	-17220.1	2.926	0	0.0871632	1	0.95	0.044	0.006	0	0.032	1	1	0.95	0.044	0.006	0	0.032	1	1
MAP3K4	-44731.3	-44708.5	-44708.5	45.622	0	1.43422e-11	1	0.863	0.111	0.023	0.003	0.038	1	1	0.863	0.111	0.023	0.003	0.038	1	1
METTL18	-12383.7	-12383.5	-12383.5	0.254	0	0.614273	1	0.604	0.38	0.01	0.006	0.138	1	1	0.604	0.38	0.01	0.006	0.138	1	1
MFRP	-16303.8	-16299	-16299	9.592	0	0.00195427	1	0.526	0.391	0.047	0.035	0.111	1	1	0.526	0.391	0.047	0.035	0.111	1	1
MPHOSPH9	-34409	-34396.9	-34396.9	24.25	0	8.46071e-07	1	0.656	0.276	0.048	0.02	0.115	1	1	0.656	0.276	0.048	0.02	0.115	1	1
NFATC2	-21364.2	-21359.6	-21359.6	9.14	0	0.00250081	1	0.904	0.078	0.017	0.001	0.051	1	1	0.904	0.078	0.017	0.001	0.051	1	1
NRG4	-3086.45	-3086.45	-3086.45	0	0	1	1	0.587	0.413	0	0	0.114	1	1	0.587	0.413	0	0	0.114	1	1
NUP214	-72236.8	-72223.5	-72223.5	26.6	0	2.50244e-07	1	0.697	0.265	0.028	0.011	0.103	1	1	0.697	0.265	0.028	0.011	0.103	1	1
OGG1	-13354.2	-13351.7	-13350.6	4.854	2.24	0.0275821	0.134481	0.608	0.356	0.022	0.013	0.071	1	1	0.62	0.362	0.011	0.007	0.073	1	3.067
OSBPL2	-14109.5	-14107.3	-14107.3	4.402	0	0.0358968	1	0.868	0.12	0.01	0.001	0.041	1	1	0.868	0.12	0.01	0.001	0.041	1	1
PAPPA2	-54643.8	-54639.4	-54639.4	8.954	0	0.00276863	1	0.68	0.288	0.022	0.009	0.091	1	1	0.68	0.288	0.022	0.009	0.091	1	1
PARD6B	-9218.22	-9212.12	-9211.64	12.198	0.95	0.000478408	0.329719	0.915	0.075	0.009	0.001	0.027	1	1	0.916	0.074	0.008	0.001	0.027	1	1.752
PP2D1	-29279.8	-29271	-29270.7	17.724	0.49	2.55384e-05	0.483927	0.467	0.416	0.062	0.055	0.15	1	1	0.475	0.421	0.055	0.049	0.152	1	1.344
RCCD1	-10298.4	-10294.5	-10294.3	7.744	0.552	0.00538913	0.457502	0.632	0.315	0.035	0.018	0.092	1	1	0.652	0.324	0.016	0.008	0.095	1	2.288
RGS22	-41377.4	-41368.6	-41368.6	17.8	0	2.45383e-05	1	0.664	0.294	0.029	0.013	0.099	1	1	0.664	0.294	0.029	0.013	0.099	1	1
RNF207	-18149	-18145.3	-18145.3	7.38	0	0.00659532	1	0.835	0.14	0.022	0.004	0.083	1	1	0.835	0.14	0.022	0.004	0.083	1	1
RNF213	-224826	-224768	-224768	116.804	0	3.16886e-27	1	0.604	0.328	0.044	0.024	0.105	1	1	0.604	0.328	0.044	0.024	0.105	1	1
RTTN	-74415.6	-74405.8	-74405.8	19.594	0	9.57695e-06	1	0.746	0.222	0.025	0.007	0.104	1	1	0.746	0.222	0.025	0.007	0.104	1	1
SALL4	-37051.5	-36996.1	-36996.1	110.796	0	6.55839e-26	1	0.744	0.155	0.084	0.017	0.08	1	1	0.744	0.155	0.084	0.017	0.08	1	1
SASH1	-35167	-35149	-35147.8	35.85	2.368	2.13108e-09	0.123846	0.802	0.178	0.017	0.004	0.048	1	1	0.808	0.179	0.01	0.002	0.048	1	1.735
SDCCAG8	-22635.1	-22618.5	-22618.5	33.214	0	8.2554e-09	1	0.524	0.301	0.111	0.064	0.131	1	1	0.524	0.301	0.111	0.064	0.131	1	1
SETX	-97420.8	-97408.3	-97408.3	25.088	0	5.47727e-07	1	0.587	0.384	0.017	0.011	0.08	1	1	0.587	0.384	0.017	0.011	0.08	1	1
SLC26A11	-19790.6	-19756.9	-19756.9	67.484	0	2.12404e-16	1	0.773	0.094	0.118	0.014	0.079	1	1	0.773	0.094	0.118	0.014	0.079	1	1
SOCS6	-14855.5	-14828.2	-14828.2	54.474	0	1.57518e-13	1	0.797	0.092	0.1	0.012	0.037	1	1	0.797	0.092	0.1	0.012	0.037	1	1
SPATA4	-12075.4	-12073.5	-12073.5	3.762	0	0.0524298	1	0.513	0.439	0.026	0.022	0.091	1	1	0.513	0.439	0.026	0.022	0.091	1	1
TACC2	-123501	-123498	-123492	4.694	12.082	0.0302681	0.00050911	0.355	0.618	0.01	0.017	0.091	1	1	0.359	0.623	0.007	0.012	0.092	1	4.381
TET1	-83295.1	-83279.7	-83279.7	30.682	0	3.03972e-08	1	0.528	0.372	0.059	0.042	0.199	1	1	0.528	0.372	0.059	0.042	0.199	1	1
TEX36	-7851.33	-7842.41	-7842.41	17.842	0	2.40026e-05	1	0.501	0.318	0.111	0.07	0.11	1	1	0.501	0.318	0.111	0.07	0.11	1	1
TMLHE	-6859.25	-6858.66	-6858.66	1.186	0	0.276138	1	0.759	0.192	0.039	0.01	0.057	1	1	0.759	0.192	0.039	0.01	0.057	1	1
TTF1	-33391.7	-33387.8	-33386.8	7.838	1.98	0.00511592	0.15939	0.497	0.454	0.026	0.024	0.112	1	1	0.502	0.46	0.019	0.018	0.113	1	1.912
UBA5	-8388.6	-8388.6	-8388.6	0	0	1	1	0.891	0.109	0	0	0.039	1	1	0.891	0.109	0	0	0.039	1	1
VWA3A	-44074.8	-44061.3	-44061.3	27.088	0.006	1.94401e-07	0.938258	0.628	0.301	0.048	0.023	0.147	1	1	0.629	0.302	0.047	0.022	0.147	1	1.02
WWC3	-33291	-33278.9	-33278.9	24.254	0	8.44316e-07	1	0.824	0.14	0.031	0.005	0.066	1	1	0.824	0.14	0.031	0.005	0.066	1	1
WWTR1	-9289.39	-9289.39	-9289.39	0	0	1	1	0.933	0.067	0	0	0.044	1	1	0.933	0.067	0	0	0.044	1	1
XCR1	-12845.3	-12828	-12823.5	34.54	8.91	4.17581e-09	0.00283613	0.658	0.211	0.1	0.032	0.087	1	1	0.674	0.21	0.088	0.028	0.091	1	2.335
ZNF672	-13367.2	-13308.8	-13308.8	116.818	0	3.14657e-27	1	0.396	0.084	0.43	0.091	0.048	1	1	0.396	0.084	0.43	0.091	0.048	1	1
ZP4	-19744.1	-19736.5	-19735.8	15.228	1.384	9.52802e-05	0.239421	0.49	0.33	0.108	0.072	0.168	1	1	0.531	0.355	0.068	0.045	0.169	1	1.767
ZSCAN16	-9335.88	-9333.9	-9332.17	3.97	3.454	0.0463178	0.0630989	0.653	0.283	0.044	0.019	0.154	1	1	0.687	0.299	0.01	0.004	0.158	1	12.294

## Sheet: 3L (PC1) Pos. Cor. BS Results
Gene	M1lnL	bs1lnL	bs2lnL	2(m1-bs1)	2(bs2-bs1)	Acc pval	Pos sel pval	Site class 0	Site class1	Site class 2A	Site class 2B	Omega0	Omega1	Omega2	Ssite class 0	Ssite class 1	Ssite class 2A	Ssite class 2B	Oomega0	Oomga1	Oomega2
ABCB4	-34713.9	-34657.1	-34657.1	113.602	0	1.59274e-26	1	0.675	0.115	0.179	0.031	0.062	1	1	0.675	0.115	0.179	0.031	0.062	1	1
ABCF3	-14876.9	-14855.7	-14855.7	42.412	0	7.3935e-11	1	0.881	0.042	0.074	0.004	0.016	1	1	0.881	0.042	0.074	0.004	0.016	1	1
AK5	-14053.9	-14050.6	-14050.6	6.598	0	0.0102093	1	0.825	0.137	0.032	0.005	0.043	1	1	0.825	0.137	0.032	0.005	0.043	1	1
CKM	-7424.44	-7399.26	-7399.26	50.374	0	1.27067e-12	1	0.91	0.014	0.075	0.001	0.009	1	1	0.91	0.014	0.075	0.001	0.009	1	1
COL28A1	-33412.1	-33287.8	-33281.9	248.532	11.84	5.42601e-56	0.000579718	0.264	0.127	0.411	0.198	0.082	1	1	0.353	0.168	0.324	0.154	0.082	1	1.702
DHCR24	-10443.2	-10438.9	-10438.9	8.738	0	0.00311646	1	0.938	0.042	0.019	0.001	0.013	1	1	0.938	0.042	0.019	0.001	0.013	1	1
KRT10	-15830.9	-15802.1	-15800.7	57.588	2.748	3.23191e-14	0.0973762	0.522	0.213	0.188	0.077	0.063	1	1	0.567	0.226	0.148	0.059	0.065	1	1.653
MYH13	-46786	-46528.2	-46528.2	515.67	0	3.70338e-114	1	0.669	0.044	0.27	0.018	0.031	1	1	0.669	0.044	0.27	0.018	0.031	1	1
MYH16	-15108.1	-15079.3	-15079.3	57.546	0	3.30167e-14	1	0.685	0.096	0.193	0.027	0.084	1	1	0.685	0.096	0.193	0.027	0.084	1	1
MYH4	-43221.4	-43055.5	-43055.5	331.644	0	4.21429e-74	1	0.765	0.061	0.161	0.013	0.017	1	1	0.765	0.061	0.161	0.013	0.017	1	1
MYL1	-3900.82	-3893.08	-3893.08	15.472	0	8.37365e-05	1	0.858	0.064	0.073	0.005	0.021	1	1	0.858	0.064	0.073	0.005	0.021	1	1
NEB	-154551	-154268	-154268	566.71	0	2.91732e-125	1	0.785	0.087	0.115	0.013	0.037	1	1	0.785	0.087	0.115	0.013	0.037	1	1
NEFL	-10247.5	-10205	-10205	85.168	0	2.74061e-20	1	0.844	0.04	0.111	0.005	0.02	1	1	0.844	0.04	0.111	0.005	0.02	1	1
OMP	-4072.55	-4052.16	-4052.16	40.768	0	1.71417e-10	1	0.755	0.043	0.191	0.011	0.043	1	1	0.755	0.043	0.191	0.011	0.043	1	1
OR10A4	-8768.79	-8741.69	-8741.69	54.208	0	1.80351e-13	1	0.664	0.142	0.16	0.034	0.045	1	1	0.664	0.142	0.16	0.034	0.045	1	1
OR51G1	-11136	-11109.9	-11109.9	52.238	0	4.91655e-13	1	0.601	0.089	0.27	0.04	0.065	1	1	0.601	0.089	0.27	0.04	0.065	1	1
OR51Q1	-11495.7	-11483.4	-11483.4	24.698	0	6.70537e-07	1	0.698	0.19	0.089	0.024	0.093	1	1	0.698	0.19	0.089	0.024	0.093	1	1
PERP	-4730.6	-4712.48	-4712.48	36.238	0	1.74632e-09	1	0.803	0.096	0.09	0.011	0.03	1	1	0.803	0.096	0.09	0.011	0.03	1	1
PRDM12	-5473.01	-5456.49	-5456.45	33.052	0.076	8.97267e-09	0.782793	0.957	0.003	0.04	0	0.007	1	1	0.96	0.003	0.037	0	0.007	1	1.143
PRKCH	-13723.4	-13719.6	-13719.6	7.504	0	0.00615621	1	0.947	0.023	0.029	0.001	0.016	1	1	0.947	0.023	0.029	0.001	0.016	1	1
RYR3	-100620	-100576	-100576	88.336	0	5.52291e-21	1	0.911	0.049	0.037	0.002	0.026	1	1	0.911	0.049	0.037	0.002	0.026	1	1
SEC14L4	-14129.6	-14084.2	-14084.2	90.796	0	1.59275e-21	1	0.636	0.12	0.205	0.039	0.09	1	1	0.636	0.12	0.205	0.039	0.09	1	1
SIDT1	-21135.1	-21066.3	-21065.6	137.712	1.416	8.4251e-32	0.234063	0.727	0.084	0.169	0.02	0.061	1	1	0.749	0.086	0.148	0.017	0.061	1	1.251
SLC25A11	-6430.79	-6425.19	-6425.19	11.192	0	0.000821507	1	0.914	0.051	0.033	0.002	0.015	1	1	0.914	0.051	0.033	0.002	0.015	1	1
SLC4A1	-31583.1	-31549.6	-31549.5	67.144	0.01	2.52382e-16	0.920344	0.674	0.209	0.089	0.028	0.063	1	1	0.675	0.21	0.088	0.027	0.063	1	1.022
STX1A	-5437.9	-5436.25	-5436.25	3.31	0	0.0688595	1	0.979	0.004	0.017	0	0.01	1	1	0.979	0.004	0.017	0	0.01	1	1
SULF1	-20702.7	-20698.3	-20698.3	8.708	0	0.00316817	1	0.899	0.077	0.023	0.002	0.026	1	1	0.899	0.077	0.023	0.002	0.026	1	1
TKT	-15263.8	-15250	-15250	27.602	0	1.49025e-07	1	0.878	0.059	0.059	0.004	0.027	1	1	0.878	0.059	0.059	0.004	0.027	1	1
TSPAN33	-5919.38	-5901.61	-5901.09	35.546	1.04	2.49098e-09	0.307821	0.761	0.059	0.167	0.013	0.043	1	1	0.801	0.061	0.128	0.01	0.043	1	1.497
TSSK6	-5806.11	-5803.69	-5803.69	4.844	0	0.0277425	1	0.977	0.01	0.013	0	0.008	1	1	0.977	0.01	0.013	0	0.008	1	1

## Sheet: ELL (PC2) Neg. Cor. BS Results
Gene	M1lnL	bs1lnL	bs2lnL	2(m1-bs1)	2(bs2-bs1)	Acc pval	Pos sel pval	Site class 0	Site class1	Site class 2A	Site class 2B	Omega0	Omega1	Omega2	Ssite class 0	Ssite class 1	Ssite class 2A	Ssite class 2B	Oomega0	Oomga1	Oomega2
DMPK	-15453.2	-15446.4	-15446.4	13.67	0	0.000217908	1	0.776	0.153	0.059	0.012	0.056	1	1	0.776	0.153	0.059	0.012	0.056	1	1
DNMBP	-53411.9	-53395.1	-53395.1	33.69	0	6.46321e-09	1	0.643	0.291	0.045	0.02	0.067	1	1	0.643	0.291	0.045	0.02	0.067	1	1
FKSG29	-6247.06	-6247.06	-6245.08	0	3.944	1	0.0470388	0.244	0.756	0	0	0.533	1	1	0.21	0.57	0.059	0.161	0.549	1	2.779
KIF24	-47149.6	-47149.6	-47149.6	0.052	0	0.819619	1	0.525	0.471	0.002	0.002	0.098	1	1	0.525	0.471	0.002	0.002	0.098	1	1
MDN1	-154024	-154022	-154022	5.052	0	0.0245975	1	0.777	0.209	0.011	0.003	0.085	1	1	0.777	0.209	0.011	0.003	0.085	1	1
NACA	-30022.7	-30022.7	-30022.7	0	0	1	1	0.402	0.598	0	0	0.072	1	1	0.402	0.598	0	0	0.072	1	1
PKHD1	-147784	-147782	-147782	4.268	0	0.0388366	1	0.615	0.364	0.013	0.008	0.143	1	1	0.615	0.364	0.013	0.008	0.143	1	1
PRR14L	-85697.2	-85697.2	-85692.2	0	10.062	1	0.00151359	0.336	0.664	0	0	0.178	1	1	0.334	0.659	0.002	0.004	0.178	1	8.047
SLC36A4	-11857.2	-11857.2	-11857.2	0	0	1	1	0.839	0.161	0	0	0.053	1	1	0.839	0.161	0	0	0.053	1	1
SSH2	-38146.6	-38146.6	-38146.6	0	0	1	1	0.681	0.319	0	0	0.054	1	1	0.681	0.319	0	0	0.054	1	1

## Sheet: ELL (PC2) Pos. Cor. BS Results
Gene	M1lnL	bs1lnL	bs2lnL	2(m1-bs1)	2(bs2-bs1)	Acc pval	Pos sel pval	Site class 0	Site class1	Site class 2A	Site class 2B	Omega0	Omega1	Omega2	Ssite class 0	Ssite class 1	Ssite class 2A	Ssite class 2B	Oomega0	Oomga1	Oomega2
ACTRT2	-13061.1	-13039.2	-13039.2	43.788	0	3.65942e-11	1	0.821	0.07	0.1	0.009	0.053	1	1	0.821	0.07	0.1	0.009	0.053	1	1
ANGPT1	-9219.08	-9214.16	-9213.13	9.856	2.058	0.00169279	0.151409	0.896	0.044	0.057	0.003	0.035	1	1	0.917	0.045	0.036	0.002	0.035	1	2.199
APOLD1	-7101.66	-7100.73	-7100.73	1.866	0	0.171934	1	0.734	0.162	0.085	0.019	0.082	1	1	0.734	0.162	0.085	0.019	0.082	1	1
ATP2B1	-18631.2	-18631.2	-18631.2	0.008	0	0.92873	1	0.979	0.02	0.001	0	0.009	1	1	0.979	0.02	0.001	0	0.009	1	1
DNAJA4	-9782.53	-9782.34	-9782.34	0.388	0	0.533353	1	0.855	0.132	0.011	0.002	0.04	1	1	0.855	0.132	0.011	0.002	0.04	1	1
DRAM1	-5473.55	-5468.73	-5468.73	9.64	0	0.00190385	1	0.841	0.058	0.094	0.007	0.045	1	1	0.841	0.058	0.094	0.007	0.045	1	1
HEPACAM	-9757.6	-9751.35	-9751.06	12.51	0.58	0.00040478	0.446312	0.88	0.058	0.058	0.004	0.041	1	1	0.9	0.059	0.038	0.002	0.042	1	1.696
LOC730159	-6899.03	-6893.9	-6893.89	10.262	0.03	0.00135798	0.86249	0.204	0.217	0.281	0.298	0.24	1	1	0.212	0.225	0.273	0.29	0.24	1	1.066
OSGIN2	-12117	-12104.7	-12104.5	24.776	0.262	6.43943e-07	0.608749	0.804	0.09	0.095	0.011	0.06	1	1	0.824	0.092	0.075	0.008	0.06	1	1.311
SLC35G6	-9790.97	-9692.52	-9690.12	196.912	4.788	9.85663e-45	0.0286587	0.146	0.013	0.773	0.068	0.099	1	1	0.3	0.026	0.619	0.054	0.099	1	1.619

## Sheet: BS Model Background Test
Removed foreground branches prior to running tests
PC1pos
Gene	M1lnL	bs1lnL	bs2lnL	2(bs1-m1)	2(bs2-bs1)	Acc pval	Pos sel pval		M1lnL	M2lnL	M8AlnL	M8lnL	2(M2-M1)	2(M8-M8A)
COL28A1	-33412.1	-33287.8	-33281.9	248.532	11.84	5.42601e-56	0.000579718		-28453.9	-28430.8	-28440.4	-28420.4	46.1953	40.1563	1.07035e-11	2.3443e-10
PC1neg
Gene	M1lnL	bs1lnL	bs2lnL	2(m1-bs1)	2(bs2-bs1)	Acc pval	Pos sel pval
C2orf81	-28237.7	-28231.9	-28227.7	11.522	8.496	0.000687774	0.00355928		-22331.8	-22323.6	-22237.5	-22228.6	16.4632	17.7364	4.96038e-05	2.53724e-05
CCDC168	-306791	-306738	-306701	107.252	73.496	3.92015e-25	1.0084e-17		-239304	-238865	-239296	-238850	878.609	892.895	4.38591e-193	3.4389e-196
CCNB3	-64965.7	-64957	-64931.3	17.322	51.546	3.15513e-05	6.9939e-13		-48190.8	-48072.8	-48180.9	-48065.7	236.024	230.404	2.89523e-53	4.86714e-52
LINS	-30800.4	-30794.9	-30793	11.082	3.858	0.000871697	0.0495093		-24535.4	-24498.2	-24488.3	-24455.5	74.4649	65.5968	6.17262e-18	5.53285e-16
TACC2	-123501	-123498	-123492	4.694	12.082	0.0302681	0.00050911		-101828	-101599	-101622	-101406	458.828	433.731	8.64873e-102	2.50544e-96
XCR1	-12845.3	-12828	-12823.5	34.54	8.91	4.17581e-09	0.00283613		-9744.61	-9736.84	-9642.84	-9634.51	15.5503	16.6605	8.03394e-05	4.47018e-05
PC2pos
Gene	M1lnL	bs1lnL	bs2lnL	2(m1-bs1)	2(bs2-bs1)	Acc pval	Pos sel pval
SLC35G6	-9790.97	-9692.52	-9690.12	196.912	4.788	9.85663e-45	0.0286587		-7597.73	-7596.05	-7579.81	-7578.57	3.35497	2.48626	0.0670023	0.114844
